# Supplementary material for: Mixed heavy metal stress induces global iron starvation response
Source: PubMed Central journal article supplement (PMC9938188; doi:10.1038/s41396-022-01351-3), 2022-12-26
Supplement: 41396_2022_1351_MOESM2_ESM.pdf [file 41396_2022_1351_MOESM2_ESM.pdf]

| GenBank    | Protein Annotation (NCBI)                             | Sample          | Counts (mean) | Counts (SD) | CV%         |
|------------|-------------------------------------------------------|-----------------|---------------|-------------|-------------|
| UIJ64229.1 | SMI1/KNR4_family_protein_[Bacillus_cereus]            | CPTF_AI         | 899524.6667   | 17883.5373  | 1.988109716 |
| UIJ64229.1 | SMI1/KNR4_family_protein_[Bacillus_cereus]            | CPTF_Cd         | 890235        | 55576.76125 | 6.242931501 |
| UIJ64229.1 | SMI1/KNR4_family_protein_[Bacillus_cereus]            | CPTF_Co         | 937271        | 81179.59406 | 8.661272359 |
| UIJ64229.1 | SMI1/KNR4_family_protein_[Bacillus_cereus]            | CPTF_Cu         | 942984.6667   | 90831.30399 | 9.632320355 |
| UIJ64229.1 | SMI1/KNR4_family_protein_[Bacillus_cereus]            | CPTF_Fe         | 957257.9667   | 81659.93698 | 8.530609284 |
| UIJ64229.1 | SMI1/KNR4_family_protein_[Bacillus_cereus]            | CPTF_Mn         | 832944        | 126024.3302 | 15.12998835 |
| UIJ64229.1 | SMI1/KNR4_family_protein_[Bacillus_cereus]            | CPTF_Ni         | 940350.3333   | 97071.51397 | 10.32290951 |
| UIJ64229.1 | SMI1/KNR4_family_protein_[Bacillus_cereus]            | CPTF_U          | 803177.6667   | 297527.4208 | 37.0437866  |
| UIJ64229.1 | SMI1/KNR4_family_protein_[Bacillus_cereus]            | CPTF_metals_mix | 1107099       | 182904.9306 | 16.5210998  |
| UIJ64229.1 | SMI1/KNR4_family_protein_[Bacillus_cereus]            | CPTF_zcontrol   | 951413.3333   | 53065.9328  | 5.577589776 |
| UIJ64230.1 | HNH_endonuclease_[Bacillus_cereus]                    | CPTF_AI         | 330031.1333   | 31374.26281 | 9.506455496 |
| UIJ64230.1 | HNH_endonuclease_[Bacillus_cereus]                    | CPTF_Cd         | 53502.66667   | 92669.33701 | 173.2050808 |
| UIJ64230.1 | HNH_endonuclease_[Bacillus_cereus]                    | CPTF_Co         | 243520.9667   | 225297.7952 | 92.51679571 |
| UIJ64230.1 | HNH_endonuclease_[Bacillus_cereus]                    | CPTF_Cu         | 255097.0667   | 185803.8362 | 72.83652402 |
| UIJ64230.1 | HNH_endonuclease_[Bacillus_cereus]                    | CPTF_Fe         | 314353.7      | 126924.9182 | 40.3764671  |
| UIJ64230.1 | HNH_endonuclease_[Bacillus_cereus]                    | CPTF_Mn         | 140404.6667   | 122818.2544 | 87.47448168 |
| UIJ64230.1 | HNH_endonuclease_[Bacillus_cereus]                    | CPTF_Ni         | 287154.7333   | 98128.29738 | 34.17262054 |
| UIJ64230.1 | HNH_endonuclease_[Bacillus_cereus]                    | CPTF_U          | 206738.1333   | 168100.6731 | 81.31091754 |
| UIJ64230.1 | HNH_endonuclease_[Bacillus_cereus]                    | CPTF_metals_mix | 15839.6       | 14204.06825 | 89.67441257 |
| UIJ64230.1 | HNH_endonuclease_[Bacillus_cereus]                    | CPTF_zcontrol   | 379976.7667   | 76308.82592 | 20.08249783 |
| UIJ64234.1 | hypothetical_protein_LW858_14490_[Bacillus_cereus]    | CPTF_AI         | 50901.5       | 48734.30521 | 95.7423754  |
| UIJ64234.1 | hypothetical_protein_LW858_14490_[Bacillus_cereus]    | CPTF_Cd         | 0             | 0           | 0           |
| UIJ64234.1 | hypothetical_protein_LW858_14490_[Bacillus_cereus]    | CPTF_Co         | 16585.16667   | 28726.35132 | 173.2050808 |
| UIJ64234.1 | hypothetical_protein_LW858_14490_[Bacillus_cereus]    | CPTF_Cu         | 0             | 0           | 0           |
| UIJ64234.1 | hypothetical_protein_LW858_14490_[Bacillus_cereus]    | CPTF_Fe         | 45219.03333   | 39516.22565 | 87.38847944 |
| UIJ64234.1 | hypothetical_protein_LW858_14490_[Bacillus_cereus]    | CPTF_Mn         | 0             | 0           | 0           |
| UIJ64234.1 | hypothetical_protein_LW858_14490_[Bacillus_cereus]    | CPTF_Ni         | 0             | 0           | 0           |
| UIJ64234.1 | hypothetical_protein_LW858_14490_[Bacillus_cereus]    | CPTF_U          | 0             | 0           | 0           |
| UIJ64234.1 | hypothetical_protein_LW858_14490_[Bacillus_cereus]    | CPTF_metals_mix | 0             | 0           | 0           |
| UIJ64234.1 | hypothetical_protein_LW858_14490_[Bacillus_cereus]    | CPTF_zcontrol   | 0             | 0           | 0           |
| UIJ64240.1 | alpha/beta_hydrolase_[Bacillus_cereus]                | CPTF_AI         | 1093803.133   | 98187.95131 | 8.976748038 |
| UIJ64240.1 | alpha/beta_hydrolase_[Bacillus_cereus]                | CPTF_Cd         | 1182657.333   | 14702.74486 | 1.243195678 |
| UIJ64240.1 | alpha/beta_hydrolase_[Bacillus_cereus]                | CPTF_Co         | 777539.6667   | 196457.1658 | 25.26651363 |
| UIJ64240.1 | alpha/beta_hydrolase_[Bacillus_cereus]                | CPTF_Cu         | 869966        | 182051.7761 | 20.92630931 |
| UIJ64240.1 | alpha/beta_hydrolase_[Bacillus_cereus]                | CPTF_Fe         | 1104437.667   | 229769.391  | 20.80419728 |
| UIJ64240.1 | alpha/beta_hydrolase_[Bacillus_cereus]                | CPTF_Mn         | 759781.3333   | 140917.8122 | 18.54715376 |
| UIJ64240.1 | alpha/beta_hydrolase_[Bacillus_cereus]                | CPTF_Ni         | 726139.3      | 152532.4966 | 21.00595528 |
| UIJ64240.1 | alpha/beta_hydrolase_[Bacillus_cereus]                | CPTF_U          | 723781        | 247503.4321 | 34.1959007  |
| UIJ64240.1 | alpha/beta_hydrolase_[Bacillus_cereus]                | CPTF_metals_mix | 693420.4667   | 44146.93161 | 6.366545803 |
| UIJ64240.1 | alpha/beta_hydrolase_[Bacillus_cereus]                | CPTF_zcontrol   | 791938.6667   | 218457.0319 | 27.58509479 |
| UIJ64246.1 | ABC_transporter_ATP-binding_protein_[Bacillus_cereus] | CPTF_AI         | 359692.7333   | 137397.4965 | 38.19857444 |
| UIJ64246.1 | ABC_transporter_ATP-binding_protein_[Bacillus_cereus] | CPTF_Cd         | 155337.9667   | 146615.6439 | 94.38493824 |
| UIJ64246.1 | ABC_transporter_ATP-binding_protein_[Bacillus_cereus] | CPTF_Co         | 465027.4667   | 227339.696  | 48.88736952 |
| UIJ64246.1 | ABC_transporter_ATP-binding_protein_[Bacillus_cereus] | CPTF_Cu         | 420862.1      | 115669.8589 | 27.48402836 |
| UIJ64246.1 | ABC_transporter_ATP-binding_protein_[Bacillus_cereus] | CPTF_Fe         | 345491.1      | 158203.6921 | 45.79096019 |
| UIJ64246.1 | ABC_transporter_ATP-binding_protein_[Bacillus_cereus] | CPTF_Mn         | 354748.1667   | 68663.7378  | 19.35562865 |
| UIJ64246.1 | ABC_transporter_ATP-binding_protein_[Bacillus_cereus] | CPTF_Ni         | 533113.5333   | 107104.838  | 20.0904369  |
| UIJ64246.1 | ABC_transporter_ATP-binding_protein_[Bacillus_cereus] | CPTF_U          | 472544        | 311626.9673 | 65.94665625 |
| UIJ64246.1 | ABC_transporter_ATP-binding_protein_[Bacillus_cereus] | CPTF_metals_mix | 752348.2      | 89381.30262 | 11.88031056 |
| UIJ64246.1 | ABC_transporter_ATP-binding_protein_[Bacillus_cereus] | CPTF_zcontrol   | 306734.4667   | 130507.3455 | 42.54733644 |
| UIJ64281.1 | ABC_transporter_ATP-binding_protein_[Bacillus_cereus] | CPTF_AI         | 297091.6667   | 107552.564  | 36.20181112 |
| UIJ64281.1 | ABC_transporter_ATP-binding_protein_[Bacillus_cereus] | CPTF_Cd         | 618782.5      | 127047.7771 | 20.53189564 |
| UIJ64281.1 | ABC_transporter_ATP-binding_protein_[Bacillus_cereus] | CPTF_Co         | 240456.4667   | 240539.7931 | 100.0346534 |
| UIJ64281.1 | ABC_transporter_ATP-binding_protein_[Bacillus_cereus] | CPTF_Cu         | 113282.5667   | 108587.8178 | 95.85571815 |
| UIJ64281.1 | ABC_transporter_ATP-binding_protein_[Bacillus_cereus] | CPTF_Fe         | 434783        | 202242.2358 | 46.51567237 |
| UIJ64281.1 | ABC_transporter_ATP-binding_protein_[Bacillus_cereus] | CPTF_Mn         | 356405.3333   | 199694.1984 | 56.03008141 |
| UIJ64281.1 | ABC_transporter_ATP-binding_protein_[Bacillus_cereus] | CPTF_Ni         | 0             | 0           | 0           |
| UIJ64281.1 | ABC_transporter_ATP-binding_protein_[Bacillus_cereus] | CPTF_U          | 86443.26667   | 40896.04407 | 47.30969298 |
| UIJ64281.1 | ABC_transporter_ATP-binding_protein_[Bacillus_cereus] | CPTF_metals_mix | 357481.3333   | 46658.98253 | 13.05214515 |
| UIJ64281.1 | ABC_transporter_ATP-binding_protein_[Bacillus_cereus] | CPTF_zcontrol   | 277643        | 140167.2971 | 50.48472213 |

|            |                                                    |                 |             |             |             |
|------------|----------------------------------------------------|-----------------|-------------|-------------|-------------|
| UIJ64288.1 | tyrosine-protein_phosphatase [Bacillus cereus]     | CPTF_Al         | 10940.2     | 18948.98224 | 173.2050808 |
| UIJ64288.1 | tyrosine-protein_phosphatase [Bacillus cereus]     | CPTF_Cd         | 16454.4     | 28499.85681 | 173.2050808 |
| UIJ64288.1 | tyrosine-protein_phosphatase [Bacillus cereus]     | CPTF_Co         | 9608.733333 | 16642.81433 | 173.2050808 |
| UIJ64288.1 | tyrosine-protein_phosphatase [Bacillus cereus]     | CPTF_Cu         | 56305.06667 | 5048.791222 | 8.966850624 |
| UIJ64288.1 | tyrosine-protein_phosphatase [Bacillus cereus]     | CPTF_Fe         | 0           | 0           | 0           |
| UIJ64288.1 | tyrosine-protein_phosphatase [Bacillus cereus]     | CPTF_Mn         | 0           | 0           | 0           |
| UIJ64288.1 | tyrosine-protein_phosphatase [Bacillus cereus]     | CPTF_Ni         | 13222.96667 | 22902.85009 | 173.2050808 |
| UIJ64288.1 | tyrosine-protein_phosphatase [Bacillus cereus]     | CPTF_U          | 0           | 0           | 0           |
| UIJ64288.1 | tyrosine-protein_phosphatase [Bacillus cereus]     | CPTF_metals_mix | 99034.16667 | 17352.15088 | 17.52137819 |
| UIJ64288.1 | tyrosine-protein_phosphatase [Bacillus cereus]     | CPTF_zcontrol   | 27371.23333 | 24606.35556 | 89.89859997 |
| UIJ64311.1 | lactonase_family_protein [Bacillus cereus]         | CPTF_Al         | 360487.6667 | 145935.4939 | 40.48279799 |
| UIJ64311.1 | lactonase_family_protein [Bacillus cereus]         | CPTF_Cd         | 222952      | 48048.92383 | 21.55124145 |
| UIJ64311.1 | lactonase_family_protein [Bacillus cereus]         | CPTF_Co         | 222232.6667 | 51528.76131 | 23.18685281 |
| UIJ64311.1 | lactonase_family_protein [Bacillus cereus]         | CPTF_Cu         | 303139.3333 | 27183.05432 | 8.967181535 |
| UIJ64311.1 | lactonase_family_protein [Bacillus cereus]         | CPTF_Fe         | 293689.3333 | 41638.76588 | 14.1778271  |
| UIJ64311.1 | lactonase_family_protein [Bacillus cereus]         | CPTF_Mn         | 204506.3333 | 179121.578  | 87.58730115 |
| UIJ64311.1 | lactonase_family_protein [Bacillus cereus]         | CPTF_Ni         | 350408.3333 | 180702.4369 | 51.56910372 |
| UIJ64311.1 | lactonase_family_protein [Bacillus cereus]         | CPTF_U          | 337753.3333 | 3030.113089 | 0.897137878 |
| UIJ64311.1 | lactonase_family_protein [Bacillus cereus]         | CPTF_metals_mix | 554701.6667 | 91067.9655  | 16.41746744 |
| UIJ64311.1 | lactonase_family_protein [Bacillus cereus]         | CPTF_zcontrol   | 266715.3333 | 36396.24305 | 13.64610073 |
| UIJ64338.1 | oxidoreductase [Bacillus cereus]                   | CPTF_Al         | 23984.13333 | 41541.73751 | 173.2050808 |
| UIJ64338.1 | oxidoreductase [Bacillus cereus]                   | CPTF_Cd         | 57407.66667 | 35079.57671 | 61.10608347 |
| UIJ64338.1 | oxidoreductase [Bacillus cereus]                   | CPTF_Co         | 6465.433333 | 11198.45903 | 173.2050808 |
| UIJ64338.1 | oxidoreductase [Bacillus cereus]                   | CPTF_Cu         | 61913.76667 | 69545.18244 | 112.3258787 |
| UIJ64338.1 | oxidoreductase [Bacillus cereus]                   | CPTF_Fe         | 27269.7     | 34951.63424 | 128.1702191 |
| UIJ64338.1 | oxidoreductase [Bacillus cereus]                   | CPTF_Mn         | 38119.33333 | 66024.62208 | 173.2050808 |
| UIJ64338.1 | oxidoreductase [Bacillus cereus]                   | CPTF_Ni         | 0           | 0           | 0           |
| UIJ64338.1 | oxidoreductase [Bacillus cereus]                   | CPTF_U          | 38359.66667 | 66440.89163 | 173.2050808 |
| UIJ64338.1 | oxidoreductase [Bacillus cereus]                   | CPTF_metals_mix | 120183.7667 | 89793.55845 | 74.71354987 |
| UIJ64338.1 | oxidoreductase [Bacillus cereus]                   | CPTF_zcontrol   | 0           | 0           | 0           |
| UIJ64342.1 | aldo/keto_reductase [Bacillus cereus]              | CPTF_Al         | 0           | 0           | 0           |
| UIJ64342.1 | aldo/keto_reductase [Bacillus cereus]              | CPTF_Cd         | 23664.76667 | 40988.57822 | 173.2050808 |
| UIJ64342.1 | aldo/keto_reductase [Bacillus cereus]              | CPTF_Co         | 12439.63333 | 21546.07696 | 173.2050808 |
| UIJ64342.1 | aldo/keto_reductase [Bacillus cereus]              | CPTF_Cu         | 0           | 0           | 0           |
| UIJ64342.1 | aldo/keto_reductase [Bacillus cereus]              | CPTF_Fe         | 33176.5     | 28738.80003 | 86.62396584 |
| UIJ64342.1 | aldo/keto_reductase [Bacillus cereus]              | CPTF_Mn         | 11567.66667 | 20035.78639 | 173.2050808 |
| UIJ64342.1 | aldo/keto_reductase [Bacillus cereus]              | CPTF_Ni         | 13441.73333 | 23281.76508 | 173.2050808 |
| UIJ64342.1 | aldo/keto_reductase [Bacillus cereus]              | CPTF_U          | 6587.9      | 11410.57752 | 173.2050808 |
| UIJ64342.1 | aldo/keto_reductase [Bacillus cereus]              | CPTF_metals_mix | 0           | 0           | 0           |
| UIJ64342.1 | aldo/keto_reductase [Bacillus cereus]              | CPTF_zcontrol   | 0           | 0           | 0           |
| UIJ64363.1 | hypothetical_protein_LW858_15275 [Bacillus cereus] | CPTF_Al         | 117777.3333 | 122060.0558 | 103.6362875 |
| UIJ64363.1 | hypothetical_protein_LW858_15275 [Bacillus cereus] | CPTF_Cd         | 0           | 0           | 0           |
| UIJ64363.1 | hypothetical_protein_LW858_15275 [Bacillus cereus] | CPTF_Co         | 0           | 0           | 0           |
| UIJ64363.1 | hypothetical_protein_LW858_15275 [Bacillus cereus] | CPTF_Cu         | 51871.33333 | 89843.78479 | 173.2050808 |
| UIJ64363.1 | hypothetical_protein_LW858_15275 [Bacillus cereus] | CPTF_Fe         | 69129.66667 | 119736.095  | 173.2050808 |
| UIJ64363.1 | hypothetical_protein_LW858_15275 [Bacillus cereus] | CPTF_Mn         | 0           | 0           | 0           |
| UIJ64363.1 | hypothetical_protein_LW858_15275 [Bacillus cereus] | CPTF_Ni         | 52287       | 90563.74058 | 173.2050808 |
| UIJ64363.1 | hypothetical_protein_LW858_15275 [Bacillus cereus] | CPTF_U          | 83223.33333 | 144147.0417 | 173.2050808 |
| UIJ64363.1 | hypothetical_protein_LW858_15275 [Bacillus cereus] | CPTF_metals_mix | 0           | 0           | 0           |
| UIJ64363.1 | hypothetical_protein_LW858_15275 [Bacillus cereus] | CPTF_zcontrol   | 176503.6667 | 161353.9655 | 91.4167782  |
| UIJ64365.1 | hypothetical_protein_LW858_15285 [Bacillus cereus] | CPTF_Al         | 1182913.667 | 17824.1332  | 15.07499137 |
| UIJ64365.1 | hypothetical_protein_LW858_15285 [Bacillus cereus] | CPTF_Cd         | 1079352.467 | 58869.01638 | 5.454104956 |
| UIJ64365.1 | hypothetical_protein_LW858_15285 [Bacillus cereus] | CPTF_Co         | 982797.7333 | 164751.3017 | 16.76350037 |
| UIJ64365.1 | hypothetical_protein_LW858_15285 [Bacillus cereus] | CPTF_Cu         | 1091244.333 | 58118.50807 | 5.32589323  |
| UIJ64365.1 | hypothetical_protein_LW858_15285 [Bacillus cereus] | CPTF_Fe         | 1208055.467 | 119982.2913 | 9.931852846 |
| UIJ64365.1 | hypothetical_protein_LW858_15285 [Bacillus cereus] | CPTF_Mn         | 1179490.3   | 159098.4092 | 13.48874248 |
| UIJ64365.1 | hypothetical_protein_LW858_15285 [Bacillus cereus] | CPTF_Ni         | 742530.6333 | 84431.00306 | 11.37070974 |
| UIJ64365.1 | hypothetical_protein_LW858_15285 [Bacillus cereus] | CPTF_U          | 815994.3333 | 174086.5513 | 21.33428434 |
| UIJ64365.1 | hypothetical_protein_LW858_15285 [Bacillus cereus] | CPTF_metals_mix | 675245.2667 | 70582.74813 | 10.45290528 |
| UIJ64365.1 | hypothetical_protein_LW858_15285 [Bacillus cereus] | CPTF_zcontrol   | 1292069.367 | 186522.6376 | 14.4359616  |
| UIJ64366.1 | hydroxylamine_reductase [Bacillus cereus]          | CPTF_Al         | 1764617.233 | 740775.023  | 41.97936012 |

|            |                                                               |                 |             |             |             |
|------------|---------------------------------------------------------------|-----------------|-------------|-------------|-------------|
| UIJ64366.1 | hydroxylamine_reductase_[Bacillus_cereus]                     | CPTF_Cd         | 2282335.033 | 468598.3709 | 20.53153301 |
| UIJ64366.1 | hydroxylamine_reductase_[Bacillus_cereus]                     | CPTF_Co         | 1070715.167 | 814878.5849 | 76.10600935 |
| UIJ64366.1 | hydroxylamine_reductase_[Bacillus_cereus]                     | CPTF_Cu         | 1073086.5   | 55868.4754  | 5.206334755 |
| UIJ64366.1 | hydroxylamine_reductase_[Bacillus_cereus]                     | CPTF_Fe         | 2336912.6   | 1353403.081 | 57.91415055 |
| UIJ64366.1 | hydroxylamine_reductase_[Bacillus_cereus]                     | CPTF_Mn         | 2999703.233 | 3217172.29  | 107.2496857 |
| UIJ64366.1 | hydroxylamine_reductase_[Bacillus_cereus]                     | CPTF_Ni         | 588605.3    | 120278.5525 | 20.43450042 |
| UIJ64366.1 | hydroxylamine_reductase_[Bacillus_cereus]                     | CPTF_U          | 568295.2333 | 40157.48571 | 7.066306974 |
| UIJ64366.1 | hydroxylamine_reductase_[Bacillus_cereus]                     | CPTF_metals_mix | 2833817.1   | 373251.8075 | 13.17134431 |
| UIJ64366.1 | hydroxylamine_reductase_[Bacillus_cereus]                     | CPTF_zcontrol   | 1217357.833 | 311842.3362 | 25.61632477 |
| UIJ64381.1 | SDR_family_oxidoreductase_[Bacillus_cereus]                   | CPTF_Al         | 0           | 0           | 0           |
| UIJ64381.1 | SDR_family_oxidoreductase_[Bacillus_cereus]                   | CPTF_Cd         | 0           | 0           | 0           |
| UIJ64381.1 | SDR_family_oxidoreductase_[Bacillus_cereus]                   | CPTF_Co         | 0           | 0           | 0           |
| UIJ64381.1 | SDR_family_oxidoreductase_[Bacillus_cereus]                   | CPTF_Cu         | 0           | 0           | 0           |
| UIJ64381.1 | SDR_family_oxidoreductase_[Bacillus_cereus]                   | CPTF_Fe         | 0           | 0           | 0           |
| UIJ64381.1 | SDR_family_oxidoreductase_[Bacillus_cereus]                   | CPTF_Mn         | 20999.3     | 36371.85452 | 173.2050808 |
| UIJ64381.1 | SDR_family_oxidoreductase_[Bacillus_cereus]                   | CPTF_Ni         | 0           | 0           | 0           |
| UIJ64381.1 | SDR_family_oxidoreductase_[Bacillus_cereus]                   | CPTF_U          | 0           | 0           | 0           |
| UIJ64381.1 | SDR_family_oxidoreductase_[Bacillus_cereus]                   | CPTF_metals_mix | 1015951.867 | 171876.5708 | 16.9177868  |
| UIJ64381.1 | SDR_family_oxidoreductase_[Bacillus_cereus]                   | CPTF_zcontrol   | 0           | 0           | 0           |
| UIJ64382.1 | bacillithiol_biosynthesis_deacetylase_BshB2_[Bacillus_cereus] | CPTF_Al         | 694539.3333 | 230666.3769 | 33.21142027 |
| UIJ64382.1 | bacillithiol_biosynthesis_deacetylase_BshB2_[Bacillus_cereus] | CPTF_Cd         | 816071.3333 | 10641.34307 | 1.30397217  |
| UIJ64382.1 | bacillithiol_biosynthesis_deacetylase_BshB2_[Bacillus_cereus] | CPTF_Co         | 647503.6667 | 156505.2245 | 24.17055416 |
| UIJ64382.1 | bacillithiol_biosynthesis_deacetylase_BshB2_[Bacillus_cereus] | CPTF_Cu         | 805047.3333 | 60006.39969 | 7.453772867 |
| UIJ64382.1 | bacillithiol_biosynthesis_deacetylase_BshB2_[Bacillus_cereus] | CPTF_Fe         | 775344.1333 | 70607.27057 | 9.106571848 |
| UIJ64382.1 | bacillithiol_biosynthesis_deacetylase_BshB2_[Bacillus_cereus] | CPTF_Mn         | 584965.6    | 56183.63932 | 9.604605693 |
| UIJ64382.1 | bacillithiol_biosynthesis_deacetylase_BshB2_[Bacillus_cereus] | CPTF_Ni         | 730467.8333 | 44674.57623 | 6.115885491 |
| UIJ64382.1 | bacillithiol_biosynthesis_deacetylase_BshB2_[Bacillus_cereus] | CPTF_U          | 793740.3333 | 40935.82375 | 5.157331943 |
| UIJ64382.1 | bacillithiol_biosynthesis_deacetylase_BshB2_[Bacillus_cereus] | CPTF_metals_mix | 1237876.567 | 145442.6489 | 11.74936604 |
| UIJ64382.1 | bacillithiol_biosynthesis_deacetylase_BshB2_[Bacillus_cereus] | CPTF_zcontrol   | 677694.6667 | 87170.65502 | 12.86282146 |
| UIJ64383.1 | YojF_family_protein_[Bacillus_cereus]                         | CPTF_Al         | 0           | 0           | 0           |
| UIJ64383.1 | YojF_family_protein_[Bacillus_cereus]                         | CPTF_Cd         | 0           | 0           | 0           |
| UIJ64383.1 | YojF_family_protein_[Bacillus_cereus]                         | CPTF_Co         | 0           | 0           | 0           |
| UIJ64383.1 | YojF_family_protein_[Bacillus_cereus]                         | CPTF_Cu         | 166298.3333 | 172808.1372 | 103.9145334 |
| UIJ64383.1 | YojF_family_protein_[Bacillus_cereus]                         | CPTF_Fe         | 0           | 0           | 0           |
| UIJ64383.1 | YojF_family_protein_[Bacillus_cereus]                         | CPTF_Mn         | 0           | 0           | 0           |
| UIJ64383.1 | YojF_family_protein_[Bacillus_cereus]                         | CPTF_Ni         | 103406.6667 | 179105.6005 | 173.2050808 |
| UIJ64383.1 | YojF_family_protein_[Bacillus_cereus]                         | CPTF_U          | 66804       | 115707.9221 | 173.2050808 |
| UIJ64383.1 | YojF_family_protein_[Bacillus_cereus]                         | CPTF_metals_mix | 511305.6667 | 92305.82753 | 18.05296392 |
| UIJ64383.1 | YojF_family_protein_[Bacillus_cereus]                         | CPTF_zcontrol   | 92795       | 160725.6547 | 173.2050808 |
| UIJ64393.1 | DinB_family_protein_[Bacillus_cereus]                         | CPTF_Al         | 27722.73333 | 30855.89102 | 111.3017633 |
| UIJ64393.1 | DinB_family_protein_[Bacillus_cereus]                         | CPTF_Cd         | 15867.33333 | 27483.02751 | 173.2050808 |
| UIJ64393.1 | DinB_family_protein_[Bacillus_cereus]                         | CPTF_Co         | 36796.3     | 32000.11148 | 86.96556851 |
| UIJ64393.1 | DinB_family_protein_[Bacillus_cereus]                         | CPTF_Cu         | 0           | 0           | 0           |
| UIJ64393.1 | DinB_family_protein_[Bacillus_cereus]                         | CPTF_Fe         | 0           | 0           | 0           |
| UIJ64393.1 | DinB_family_protein_[Bacillus_cereus]                         | CPTF_Mn         | 0           | 0           | 0           |
| UIJ64393.1 | DinB_family_protein_[Bacillus_cereus]                         | CPTF_Ni         | 41661.83333 | 36082.20339 | 86.60733459 |
| UIJ64393.1 | DinB_family_protein_[Bacillus_cereus]                         | CPTF_U          | 0           | 0           | 0           |
| UIJ64393.1 | DinB_family_protein_[Bacillus_cereus]                         | CPTF_metals_mix | 0           | 0           | 0           |
| UIJ64393.1 | DinB_family_protein_[Bacillus_cereus]                         | CPTF_zcontrol   | 10025.53333 | 17364.73311 | 173.2050808 |
| UIJ64399.1 | phosphoglycerate_mutase_family_protein_[Bacillus_cereus]      | CPTF_Al         | 348553.3667 | 47764.52354 | 13.70364716 |
| UIJ64399.1 | phosphoglycerate_mutase_family_protein_[Bacillus_cereus]      | CPTF_Cd         | 532927      | 234539.2703 | 44.00964302 |
| UIJ64399.1 | phosphoglycerate_mutase_family_protein_[Bacillus_cereus]      | CPTF_Co         | 252556.6667 | 17586.72716 | 6.9634777   |
| UIJ64399.1 | phosphoglycerate_mutase_family_protein_[Bacillus_cereus]      | CPTF_Cu         | 373926.9    | 34770.33767 | 9.298699202 |
| UIJ64399.1 | phosphoglycerate_mutase_family_protein_[Bacillus_cereus]      | CPTF_Fe         | 229241      | 216790.5858 | 94.56885363 |
| UIJ64399.1 | phosphoglycerate_mutase_family_protein_[Bacillus_cereus]      | CPTF_Mn         | 334154.6333 | 17653.63392 | 5.283073213 |
| UIJ64399.1 | phosphoglycerate_mutase_family_protein_[Bacillus_cereus]      | CPTF_Ni         | 279286      | 65835.36639 | 23.57274134 |
| UIJ64399.1 | phosphoglycerate_mutase_family_protein_[Bacillus_cereus]      | CPTF_U          | 278635.3333 | 148923.0506 | 53.44729574 |
| UIJ64399.1 | phosphoglycerate_mutase_family_protein_[Bacillus_cereus]      | CPTF_metals_mix | 960550.6667 | 127101.2035 | 13.23211861 |
| UIJ64399.1 | phosphoglycerate_mutase_family_protein_[Bacillus_cereus]      | CPTF_zcontrol   | 230136.8333 | 154000.03   | 66.91672417 |
| UIJ64405.1 | oligoendopeptidase_F_[Bacillus_cereus]                        | CPTF_Al         | 984207.6    | 131616.4248 | 13.37283159 |
| UIJ64405.1 | oligoendopeptidase_F_[Bacillus_cereus]                        | CPTF_Cd         | 1179075.333 | 162315.3419 | 13.76632496 |

|            |                                                                  |                 |             |             |             |
|------------|------------------------------------------------------------------|-----------------|-------------|-------------|-------------|
| UIJ64405.1 | oligoendopeptidase_F [Bacillus cereus]                           | CPTF_Co         | 1023598.467 | 127855.295  | 12.49076656 |
| UIJ64405.1 | oligoendopeptidase_F [Bacillus cereus]                           | CPTF_Cu         | 940582.4667 | 187914.562  | 19.97853124 |
| UIJ64405.1 | oligoendopeptidase_F [Bacillus cereus]                           | CPTF_Fe         | 875738.9    | 43086.195   | 4.919981858 |
| UIJ64405.1 | oligoendopeptidase_F [Bacillus cereus]                           | CPTF_Mn         | 791840.9    | 264202.0455 | 33.36554673 |
| UIJ64405.1 | oligoendopeptidase_F [Bacillus cereus]                           | CPTF_Ni         | 689061.1    | 137425.7566 | 19.9439145  |
| UIJ64405.1 | oligoendopeptidase_F [Bacillus cereus]                           | CPTF_U          | 628052.3333 | 210158.2144 | 33.46189533 |
| UIJ64405.1 | oligoendopeptidase_F [Bacillus cereus]                           | CPTF_metals_mix | 1042496.333 | 34944.80763 | 3.352031706 |
| UIJ64405.1 | oligoendopeptidase_F [Bacillus cereus]                           | CPTF_zcontrol   | 897834.1    | 36247.60456 | 4.03722743  |
| UIJ64422.1 | YdiU_family_protein [Bacillus cereus]                            | CPTF_Al         | 0           | 0           | 0           |
| UIJ64422.1 | YdiU_family_protein [Bacillus cereus]                            | CPTF_Cd         | 0           | 0           | 0           |
| UIJ64422.1 | YdiU_family_protein [Bacillus cereus]                            | CPTF_Co         | 0           | 0           | 0           |
| UIJ64422.1 | YdiU_family_protein [Bacillus cereus]                            | CPTF_Cu         | 0           | 0           | 0           |
| UIJ64422.1 | YdiU_family_protein [Bacillus cereus]                            | CPTF_Fe         | 0           | 0           | 0           |
| UIJ64422.1 | YdiU_family_protein [Bacillus cereus]                            | CPTF_Mn         | 0           | 0           | 0           |
| UIJ64422.1 | YdiU_family_protein [Bacillus cereus]                            | CPTF_Ni         | 0           | 0           | 0           |
| UIJ64422.1 | YdiU_family_protein [Bacillus cereus]                            | CPTF_U          | 0           | 0           | 0           |
| UIJ64422.1 | YdiU_family_protein [Bacillus cereus]                            | CPTF_metals_mix | 149558.6333 | 97347.18165 | 65.08964376 |
| UIJ64422.1 | YdiU_family_protein [Bacillus cereus]                            | CPTF_zcontrol   | 0           | 0           | 0           |
| UIJ64423.1 | hypothetical_protein_LW858_15595 [Bacillus cereus]               | CPTF_Al         | 1115090.667 | 292251.9741 | 26.2088082  |
| UIJ64423.1 | hypothetical_protein_LW858_15595 [Bacillus cereus]               | CPTF_Cd         | 1005931.367 | 360543.1899 | 35.84172855 |
| UIJ64423.1 | hypothetical_protein_LW858_15595 [Bacillus cereus]               | CPTF_Co         | 1284420     | 578838.2094 | 45.06611618 |
| UIJ64423.1 | hypothetical_protein_LW858_15595 [Bacillus cereus]               | CPTF_Cu         | 480339.4333 | 169247.9988 | 35.23508317 |
| UIJ64423.1 | hypothetical_protein_LW858_15595 [Bacillus cereus]               | CPTF_Fe         | 900165.3333 | 242266.3724 | 26.91354171 |
| UIJ64423.1 | hypothetical_protein_LW858_15595 [Bacillus cereus]               | CPTF_Mn         | 669727      | 438029.0964 | 65.40412681 |
| UIJ64423.1 | hypothetical_protein_LW858_15595 [Bacillus cereus]               | CPTF_Ni         | 815544.0333 | 711088.6345 | 87.19193635 |
| UIJ64423.1 | hypothetical_protein_LW858_15595 [Bacillus cereus]               | CPTF_U          | 546698.6    | 370856.6104 | 67.83566126 |
| UIJ64423.1 | hypothetical_protein_LW858_15595 [Bacillus cereus]               | CPTF_metals_mix | 178003.7    | 41978.1691  | 23.58275086 |
| UIJ64423.1 | hypothetical_protein_LW858_15595 [Bacillus cereus]               | CPTF_zcontrol   | 1327790.333 | 429948.0974 | 32.38072206 |
| UIJ64425.1 | FMN-binding_negative_transcriptional_regulator [Bacillus cereus] | CPTF_Al         | 0           | 0           | 0           |
| UIJ64425.1 | FMN-binding_negative_transcriptional_regulator [Bacillus cereus] | CPTF_Cd         | 0           | 0           | 0           |
| UIJ64425.1 | FMN-binding_negative_transcriptional_regulator [Bacillus cereus] | CPTF_Co         | 0           | 0           | 0           |
| UIJ64425.1 | FMN-binding_negative_transcriptional_regulator [Bacillus cereus] | CPTF_Cu         | 0           | 0           | 0           |
| UIJ64425.1 | FMN-binding_negative_transcriptional_regulator [Bacillus cereus] | CPTF_Fe         | 0           | 0           | 0           |
| UIJ64425.1 | FMN-binding_negative_transcriptional_regulator [Bacillus cereus] | CPTF_Mn         | 0           | 0           | 0           |
| UIJ64425.1 | FMN-binding_negative_transcriptional_regulator [Bacillus cereus] | CPTF_Ni         | 0           | 0           | 0           |
| UIJ64425.1 | FMN-binding_negative_transcriptional_regulator [Bacillus cereus] | CPTF_U          | 0           | 0           | 0           |
| UIJ64425.1 | FMN-binding_negative_transcriptional_regulator [Bacillus cereus] | CPTF_metals_mix | 158173.6667 | 12218.96208 | 7.725029291 |
| UIJ64425.1 | FMN-binding_negative_transcriptional_regulator [Bacillus cereus] | CPTF_zcontrol   | 0           | 0           | 0           |
| UIJ64437.1 | VOC_family_protein [Bacillus cereus]                             | CPTF_Al         | 1339750     | 128334.603  | 9.578996305 |
| UIJ64437.1 | VOC_family_protein [Bacillus cereus]                             | CPTF_Cd         | 1279607.7   | 143122.1273 | 11.18484418 |
| UIJ64437.1 | VOC_family_protein [Bacillus cereus]                             | CPTF_Co         | 1444624.867 | 169885.3172 | 11.7598223  |
| UIJ64437.1 | VOC_family_protein [Bacillus cereus]                             | CPTF_Cu         | 1373777.3   | 80904.87071 | 5.889227512 |
| UIJ64437.1 | VOC_family_protein [Bacillus cereus]                             | CPTF_Fe         | 1134008.333 | 260548.3058 | 22.97587224 |
| UIJ64437.1 | VOC_family_protein [Bacillus cereus]                             | CPTF_Mn         | 1169533.4   | 86090.39326 | 7.361088898 |
| UIJ64437.1 | VOC_family_protein [Bacillus cereus]                             | CPTF_Ni         | 1212888.167 | 191458.7322 | 15.78535742 |
| UIJ64437.1 | VOC_family_protein [Bacillus cereus]                             | CPTF_U          | 1093360.833 | 200591.5724 | 18.34632871 |
| UIJ64437.1 | VOC_family_protein [Bacillus cereus]                             | CPTF_metals_mix | 1692366.5   | 207723.5346 | 12.27414597 |
| UIJ64437.1 | VOC_family_protein [Bacillus cereus]                             | CPTF_zcontrol   | 1175805.3   | 130753.3235 | 11.12032099 |
| UIJ64438.1 | VanW_family_protein [Bacillus cereus]                            | CPTF_Al         | 41403.33333 | 71712.67694 | 173.2050808 |
| UIJ64438.1 | VanW_family_protein [Bacillus cereus]                            | CPTF_Cd         | 345122      | 111859.0102 | 32.41144007 |
| UIJ64438.1 | VanW_family_protein [Bacillus cereus]                            | CPTF_Co         | 130800      | 120554.0958 | 92.16673989 |
| UIJ64438.1 | VanW_family_protein [Bacillus cereus]                            | CPTF_Cu         | 33432.33333 | 57906.49995 | 173.2050808 |
| UIJ64438.1 | VanW_family_protein [Bacillus cereus]                            | CPTF_Fe         | 169277      | 158375.9186 | 93.56021115 |
| UIJ64438.1 | VanW_family_protein [Bacillus cereus]                            | CPTF_Mn         | 0           | 0           | 0           |
| UIJ64438.1 | VanW_family_protein [Bacillus cereus]                            | CPTF_Ni         | 282152.0333 | 194302.1496 | 68.86434498 |
| UIJ64438.1 | VanW_family_protein [Bacillus cereus]                            | CPTF_U          | 163912.3333 | 179011.9739 | 109.2120222 |
| UIJ64438.1 | VanW_family_protein [Bacillus cereus]                            | CPTF_metals_mix | 188249      | 91767.80859 | 48.74809884 |
| UIJ64438.1 | VanW_family_protein [Bacillus cereus]                            | CPTF_zcontrol   | 150522.0667 | 130565.6293 | 86.74185264 |
| UIJ64444.1 | hypothetical_protein_LW858_15720 [Bacillus cereus]               | CPTF_Al         | 0           | 0           | 0           |
| UIJ64444.1 | hypothetical_protein_LW858_15720 [Bacillus cereus]               | CPTF_Cd         | 0           | 0           | 0           |
| UIJ64444.1 | hypothetical_protein_LW858_15720 [Bacillus cereus]               | CPTF_Co         | 0           | 0           | 0           |

|            |                                                              |                 |             |             |             |
|------------|--------------------------------------------------------------|-----------------|-------------|-------------|-------------|
| UIJ64444.1 | hypothetical_protein_LW858_15720 [Bacillus cereus]           | CPTF_Cu         | 0           | 0           | 0           |
| UIJ64444.1 | hypothetical_protein_LW858_15720 [Bacillus cereus]           | CPTF_Fe         | 0           | 0           | 0           |
| UIJ64444.1 | hypothetical_protein_LW858_15720 [Bacillus cereus]           | CPTF_Mn         | 0           | 0           | 0           |
| UIJ64444.1 | hypothetical_protein_LW858_15720 [Bacillus cereus]           | CPTF_Ni         | 0           | 0           | 0           |
| UIJ64444.1 | hypothetical_protein_LW858_15720 [Bacillus cereus]           | CPTF_U          | 0           | 0           | 0           |
| UIJ64444.1 | hypothetical_protein_LW858_15720 [Bacillus cereus]           | CPTF_metals_mix | 30438.26667 | 52720.62436 | 173.2050808 |
| UIJ64444.1 | hypothetical_protein_LW858_15720 [Bacillus cereus]           | CPTF_zcontrol   | 0           | 0           | 0           |
| UIJ64472.1 | hypothetical_protein_LW858_15860 [Bacillus cereus]           | CPTF_Al         | 336666.6667 | 583123.7719 | 173.2050808 |
| UIJ64472.1 | hypothetical_protein_LW858_15860 [Bacillus cereus]           | CPTF_Cd         | 708604.6667 | 619819.0227 | 87.47035573 |
| UIJ64472.1 | hypothetical_protein_LW858_15860 [Bacillus cereus]           | CPTF_Co         | 0           | 0           | 0           |
| UIJ64472.1 | hypothetical_protein_LW858_15860 [Bacillus cereus]           | CPTF_Cu         | 0           | 0           | 0           |
| UIJ64472.1 | hypothetical_protein_LW858_15860 [Bacillus cereus]           | CPTF_Fe         | 0           | 0           | 0           |
| UIJ64472.1 | hypothetical_protein_LW858_15860 [Bacillus cereus]           | CPTF_Mn         | 756666.6667 | 656226.5869 | 86.72598065 |
| UIJ64472.1 | hypothetical_protein_LW858_15860 [Bacillus cereus]           | CPTF_Ni         | 257810      | 446540.0187 | 173.2050808 |
| UIJ64472.1 | hypothetical_protein_LW858_15860 [Bacillus cereus]           | CPTF_U          | 0           | 0           | 0           |
| UIJ64472.1 | hypothetical_protein_LW858_15860 [Bacillus cereus]           | CPTF_metals_mix | 585287      | 593520.9896 | 101.4068294 |
| UIJ64472.1 | hypothetical_protein_LW858_15860 [Bacillus cereus]           | CPTF_zcontrol   | 743333.3333 | 645316.4598 | 86.81387352 |
| UIJ64495.1 | helix-turn-helix_transcriptional_regulator [Bacillus cereus] | CPTF_Al         | 0           | 0           | 0           |
| UIJ64495.1 | helix-turn-helix_transcriptional_regulator [Bacillus cereus] | CPTF_Cd         | 0           | 0           | 0           |
| UIJ64495.1 | helix-turn-helix_transcriptional_regulator [Bacillus cereus] | CPTF_Co         | 0           | 0           | 0           |
| UIJ64495.1 | helix-turn-helix_transcriptional_regulator [Bacillus cereus] | CPTF_Cu         | 0           | 0           | 0           |
| UIJ64495.1 | helix-turn-helix_transcriptional_regulator [Bacillus cereus] | CPTF_Fe         | 0           | 0           | 0           |
| UIJ64495.1 | helix-turn-helix_transcriptional_regulator [Bacillus cereus] | CPTF_Mn         | 0           | 0           | 0           |
| UIJ64495.1 | helix-turn-helix_transcriptional_regulator [Bacillus cereus] | CPTF_Ni         | 0           | 0           | 0           |
| UIJ64495.1 | helix-turn-helix_transcriptional_regulator [Bacillus cereus] | CPTF_U          | 0           | 0           | 0           |
| UIJ64495.1 | helix-turn-helix_transcriptional_regulator [Bacillus cereus] | CPTF_metals_mix | 7956.2      | 13780.54264 | 173.2050808 |
| UIJ64495.1 | helix-turn-helix_transcriptional_regulator [Bacillus cereus] | CPTF_zcontrol   | 0           | 0           | 0           |
| UIJ64509.1 | cold_shock-like_protein_CspB [Bacillus cereus]               | CPTF_Al         | 7523009.333 | 1322552.533 | 17.58009959 |
| UIJ64509.1 | cold_shock-like_protein_CspB [Bacillus cereus]               | CPTF_Cd         | 15280000    | 1211321.592 | 7.927497332 |
| UIJ64509.1 | cold_shock-like_protein_CspB [Bacillus cereus]               | CPTF_Co         | 10254293.67 | 711991.3028 | 6.943348084 |
| UIJ64509.1 | cold_shock-like_protein_CspB [Bacillus cereus]               | CPTF_Cu         | 8823523     | 1740513.215 | 19.72583077 |
| UIJ64509.1 | cold_shock-like_protein_CspB [Bacillus cereus]               | CPTF_Fe         | 10446172    | 4239067.921 | 40.5801084  |
| UIJ64509.1 | cold_shock-like_protein_CspB [Bacillus cereus]               | CPTF_Mn         | 10584570    | 7189211.421 | 67.92162007 |
| UIJ64509.1 | cold_shock-like_protein_CspB [Bacillus cereus]               | CPTF_Ni         | 9351878.333 | 2874909.938 | 30.74152417 |
| UIJ64509.1 | cold_shock-like_protein_CspB [Bacillus cereus]               | CPTF_U          | 13430000    | 3635945.544 | 27.07331008 |
| UIJ64509.1 | cold_shock-like_protein_CspB [Bacillus cereus]               | CPTF_metals_mix | 33017893.87 | 3459589.3   | 10.47792241 |
| UIJ64509.1 | cold_shock-like_protein_CspB [Bacillus cereus]               | CPTF_zcontrol   | 5780326     | 979261.9867 | 16.94129339 |
| UIJ64511.1 | flavodoxin [Bacillus cereus]                                 | CPTF_Al         | 0           | 0           | 0           |
| UIJ64511.1 | flavodoxin [Bacillus cereus]                                 | CPTF_Cd         | 0           | 0           | 0           |
| UIJ64511.1 | flavodoxin [Bacillus cereus]                                 | CPTF_Co         | 0           | 0           | 0           |
| UIJ64511.1 | flavodoxin [Bacillus cereus]                                 | CPTF_Cu         | 107975.6667 | 93642.21177 | 86.72529159 |
| UIJ64511.1 | flavodoxin [Bacillus cereus]                                 | CPTF_Fe         | 0           | 0           | 0           |
| UIJ64511.1 | flavodoxin [Bacillus cereus]                                 | CPTF_Mn         | 0           | 0           | 0           |
| UIJ64511.1 | flavodoxin [Bacillus cereus]                                 | CPTF_Ni         | 0           | 0           | 0           |
| UIJ64511.1 | flavodoxin [Bacillus cereus]                                 | CPTF_U          | 0           | 0           | 0           |
| UIJ64511.1 | flavodoxin [Bacillus cereus]                                 | CPTF_metals_mix | 324219.6667 | 41900.28337 | 12.92342436 |
| UIJ64511.1 | flavodoxin [Bacillus cereus]                                 | CPTF_zcontrol   | 0           | 0           | 0           |
| UIJ64516.1 | (S)-benzoin_forming_benzil_reductase [Bacillus cereus]       | CPTF_Al         | 86558.33333 | 75776.51753 | 87.54387314 |
| UIJ64516.1 | (S)-benzoin_forming_benzil_reductase [Bacillus cereus]       | CPTF_Cd         | 26512.1     | 45920.30422 | 173.2050808 |
| UIJ64516.1 | (S)-benzoin_forming_benzil_reductase [Bacillus cereus]       | CPTF_Co         | 0           | 0           | 0           |
| UIJ64516.1 | (S)-benzoin_forming_benzil_reductase [Bacillus cereus]       | CPTF_Cu         | 160981.5667 | 90657.21377 | 56.31527612 |
| UIJ64516.1 | (S)-benzoin_forming_benzil_reductase [Bacillus cereus]       | CPTF_Fe         | 129872.4333 | 56870.15427 | 43.78924211 |
| UIJ64516.1 | (S)-benzoin_forming_benzil_reductase [Bacillus cereus]       | CPTF_Mn         | 30234.26667 | 52367.286   | 173.2050808 |
| UIJ64516.1 | (S)-benzoin_forming_benzil_reductase [Bacillus cereus]       | CPTF_Ni         | 78676.3     | 89017.4386  | 113.1439056 |
| UIJ64516.1 | (S)-benzoin_forming_benzil_reductase [Bacillus cereus]       | CPTF_U          | 27740.86667 | 48048.59051 | 173.2050808 |
| UIJ64516.1 | (S)-benzoin_forming_benzil_reductase [Bacillus cereus]       | CPTF_metals_mix | 173938.3333 | 112028.2957 | 64.40690419 |
| UIJ64516.1 | (S)-benzoin_forming_benzil_reductase [Bacillus cereus]       | CPTF_zcontrol   | 32195.33333 | 55763.9531  | 173.2050808 |
| UIJ64517.1 | GNAT_family_N-acetyltransferase [Bacillus cereus]            | CPTF_Al         | 380023.7    | 12791.20831 | 3.365897523 |
| UIJ64517.1 | GNAT_family_N-acetyltransferase [Bacillus cereus]            | CPTF_Cd         | 434857.0333 | 197961.4891 | 45.52334996 |
| UIJ64517.1 | GNAT_family_N-acetyltransferase [Bacillus cereus]            | CPTF_Co         | 418747.3333 | 21583.06119 | 5.15419669  |
| UIJ64517.1 | GNAT_family_N-acetyltransferase [Bacillus cereus]            | CPTF_Cu         | 406181.1    | 192129.4957 | 47.30143664 |

|            |                                                                     |                 |             |             |             |
|------------|---------------------------------------------------------------------|-----------------|-------------|-------------|-------------|
| UIJ64517.1 | GNAT_family_N-acetyltransferase_[Bacillus_cereus]                   | CPTF_Fe         | 512801.0333 | 48994.29351 | 9.554250153 |
| UIJ64517.1 | GNAT_family_N-acetyltransferase_[Bacillus_cereus]                   | CPTF_Mn         | 265915.7    | 246584.4104 | 92.73029401 |
| UIJ64517.1 | GNAT_family_N-acetyltransferase_[Bacillus_cereus]                   | CPTF_Ni         | 439718.3667 | 52267.05954 | 11.88648542 |
| UIJ64517.1 | GNAT_family_N-acetyltransferase_[Bacillus_cereus]                   | CPTF_U          | 329197.5    | 205547.1927 | 62.43886807 |
| UIJ64517.1 | GNAT_family_N-acetyltransferase_[Bacillus_cereus]                   | CPTF_metals_mix | 538525.1    | 59045.48684 | 10.96429616 |
| UIJ64517.1 | GNAT_family_N-acetyltransferase_[Bacillus_cereus]                   | CPTF_zcontrol   | 405843.4    | 46863.40462 | 11.54716444 |
| UIJ64523.1 | aldehyde_dehydrogenase_DhaS_[Bacillus_cereus]                       | CPTF_AI         | 9214149.333 | 615625.0418 | 6.681300894 |
| UIJ64523.1 | aldehyde_dehydrogenase_DhaS_[Bacillus_cereus]                       | CPTF_Cd         | 8681086.4   | 583054.8073 | 6.716380651 |
| UIJ64523.1 | aldehyde_dehydrogenase_DhaS_[Bacillus_cereus]                       | CPTF_Co         | 8497890.333 | 574464.3798 | 6.760082295 |
| UIJ64523.1 | aldehyde_dehydrogenase_DhaS_[Bacillus_cereus]                       | CPTF_Cu         | 6698906.1   | 518157.5294 | 7.734957345 |
| UIJ64523.1 | aldehyde_dehydrogenase_DhaS_[Bacillus_cereus]                       | CPTF_Fe         | 8366797.9   | 415906.386  | 4.970914691 |
| UIJ64523.1 | aldehyde_dehydrogenase_DhaS_[Bacillus_cereus]                       | CPTF_Mn         | 8818396.8   | 394571.8235 | 4.47441675  |
| UIJ64523.1 | aldehyde_dehydrogenase_DhaS_[Bacillus_cereus]                       | CPTF_Ni         | 8963762.033 | 895532.6014 | 9.990588751 |
| UIJ64523.1 | aldehyde_dehydrogenase_DhaS_[Bacillus_cereus]                       | CPTF_U          | 8847571.667 | 1360734.893 | 15.37975554 |
| UIJ64523.1 | aldehyde_dehydrogenase_DhaS_[Bacillus_cereus]                       | CPTF_metals_mix | 6256393.7   | 75973.31073 | 1.214330721 |
| UIJ64523.1 | aldehyde_dehydrogenase_DhaS_[Bacillus_cereus]                       | CPTF_zcontrol   | 8766672.233 | 19015.14985 | 0.216902712 |
| UIJ64524.1 | 3-oxoacyl-ACP_reductase_FabG_[Bacillus_cereus]                      | CPTF_AI         | 29508       | 51109.35523 | 173.2050808 |
| UIJ64524.1 | 3-oxoacyl-ACP_reductase_FabG_[Bacillus_cereus]                      | CPTF_Cd         | 0           | 0           | 0           |
| UIJ64524.1 | 3-oxoacyl-ACP_reductase_FabG_[Bacillus_cereus]                      | CPTF_Co         | 32600.7     | 56466.06876 | 173.2050808 |
| UIJ64524.1 | 3-oxoacyl-ACP_reductase_FabG_[Bacillus_cereus]                      | CPTF_Cu         | 68573.5     | 59490.54781 | 86.75442818 |
| UIJ64524.1 | 3-oxoacyl-ACP_reductase_FabG_[Bacillus_cereus]                      | CPTF_Fe         | 0           | 0           | 0           |
| UIJ64524.1 | 3-oxoacyl-ACP_reductase_FabG_[Bacillus_cereus]                      | CPTF_Mn         | 0           | 0           | 0           |
| UIJ64524.1 | 3-oxoacyl-ACP_reductase_FabG_[Bacillus_cereus]                      | CPTF_Ni         | 73654.06667 | 65733.26689 | 89.24594373 |
| UIJ64524.1 | 3-oxoacyl-ACP_reductase_FabG_[Bacillus_cereus]                      | CPTF_U          | 28320.46667 | 49052.48716 | 173.2050808 |
| UIJ64524.1 | 3-oxoacyl-ACP_reductase_FabG_[Bacillus_cereus]                      | CPTF_metals_mix | 135611.4333 | 69557.84147 | 51.2920185  |
| UIJ64524.1 | 3-oxoacyl-ACP_reductase_FabG_[Bacillus_cereus]                      | CPTF_zcontrol   | 0           | 0           | 0           |
| UIJ64548.1 | tubulin-like_doman-containing_protein_[Bacillus_cereus]             | CPTF_AI         | 295299.6667 | 20695.82244 | 7.008413748 |
| UIJ64548.1 | tubulin-like_doman-containing_protein_[Bacillus_cereus]             | CPTF_Cd         | 167314.6667 | 148068.4031 | 88.49696564 |
| UIJ64548.1 | tubulin-like_doman-containing_protein_[Bacillus_cereus]             | CPTF_Co         | 109654.6667 | 189927.454  | 173.2050808 |
| UIJ64548.1 | tubulin-like_doman-containing_protein_[Bacillus_cereus]             | CPTF_Cu         | 187892.6667 | 162905.8015 | 86.70152188 |
| UIJ64548.1 | tubulin-like_doman-containing_protein_[Bacillus_cereus]             | CPTF_Fe         | 187352      | 162514.481  | 86.74285889 |
| UIJ64548.1 | tubulin-like_doman-containing_protein_[Bacillus_cereus]             | CPTF_Mn         | 261277      | 40470.20915 | 15.48938833 |
| UIJ64548.1 | tubulin-like_doman-containing_protein_[Bacillus_cereus]             | CPTF_Ni         | 85280.66667 | 147710.4476 | 173.2050808 |
| UIJ64548.1 | tubulin-like_doman-containing_protein_[Bacillus_cereus]             | CPTF_U          | 0           | 0           | 0           |
| UIJ64548.1 | tubulin-like_doman-containing_protein_[Bacillus_cereus]             | CPTF_metals_mix | 0           | 0           | 0           |
| UIJ64548.1 | tubulin-like_doman-containing_protein_[Bacillus_cereus]             | CPTF_zcontrol   | 111082.3333 | 192400.2452 | 173.2050808 |
| UIJ64554.1 | peptide_ABC_transporter_substrate-binding_protein_[Bacillus_cereus] | CPTF_AI         | 3005104.567 | 516118.8393 | 17.17473811 |
| UIJ64554.1 | peptide_ABC_transporter_substrate-binding_protein_[Bacillus_cereus] | CPTF_Cd         | 3367667.233 | 694917.0225 | 20.63496701 |
| UIJ64554.1 | peptide_ABC_transporter_substrate-binding_protein_[Bacillus_cereus] | CPTF_Co         | 2732070.633 | 177085.6922 | 6.481739163 |
| UIJ64554.1 | peptide_ABC_transporter_substrate-binding_protein_[Bacillus_cereus] | CPTF_Cu         | 1790578.533 | 173518.3449 | 9.690630246 |
| UIJ64554.1 | peptide_ABC_transporter_substrate-binding_protein_[Bacillus_cereus] | CPTF_Fe         | 3647711.767 | 617690.3203 | 16.9336384  |
| UIJ64554.1 | peptide_ABC_transporter_substrate-binding_protein_[Bacillus_cereus] | CPTF_Mn         | 2445839.533 | 586044.5749 | 23.96087589 |
| UIJ64554.1 | peptide_ABC_transporter_substrate-binding_protein_[Bacillus_cereus] | CPTF_Ni         | 2420756.4   | 495618.1986 | 20.47369156 |
| UIJ64554.1 | peptide_ABC_transporter_substrate-binding_protein_[Bacillus_cereus] | CPTF_U          | 2258283.067 | 917221.2967 | 40.61586921 |
| UIJ64554.1 | peptide_ABC_transporter_substrate-binding_protein_[Bacillus_cereus] | CPTF_metals_mix | 988863.4333 | 59312.57523 | 5.998055265 |
| UIJ64554.1 | peptide_ABC_transporter_substrate-binding_protein_[Bacillus_cereus] | CPTF_zcontrol   | 1749014.967 | 130605.5604 | 7.467378089 |
| UIJ64556.1 | peptide_ABC_transporter_substrate-binding_protein_[Bacillus_cereus] | CPTF_AI         | 41751144.53 | 2687344.397 | 6.436576595 |
| UIJ64556.1 | peptide_ABC_transporter_substrate-binding_protein_[Bacillus_cereus] | CPTF_Cd         | 42282861.63 | 2953185.979 | 6.984356936 |
| UIJ64556.1 | peptide_ABC_transporter_substrate-binding_protein_[Bacillus_cereus] | CPTF_Co         | 40236166.9  | 3099185.602 | 7.702487192 |
| UIJ64556.1 | peptide_ABC_transporter_substrate-binding_protein_[Bacillus_cereus] | CPTF_Cu         | 31084547.17 | 1938010.799 | 6.23464382  |
| UIJ64556.1 | peptide_ABC_transporter_substrate-binding_protein_[Bacillus_cereus] | CPTF_Fe         | 39641977.97 | 1895625.786 | 4.781864789 |
| UIJ64556.1 | peptide_ABC_transporter_substrate-binding_protein_[Bacillus_cereus] | CPTF_Mn         | 39996484.57 | 1608999.751 | 4.022852928 |
| UIJ64556.1 | peptide_ABC_transporter_substrate-binding_protein_[Bacillus_cereus] | CPTF_Ni         | 38294524.07 | 2049672.231 | 5.352389882 |
| UIJ64556.1 | peptide_ABC_transporter_substrate-binding_protein_[Bacillus_cereus] | CPTF_U          | 36244222.1  | 1774710.59  | 4.896533813 |
| UIJ64556.1 | peptide_ABC_transporter_substrate-binding_protein_[Bacillus_cereus] | CPTF_metals_mix | 22631518.13 | 670840.3252 | 2.964186146 |
| UIJ64556.1 | peptide_ABC_transporter_substrate-binding_protein_[Bacillus_cereus] | CPTF_zcontrol   | 41030474.2  | 727831.0269 | 1.77387915  |
| UIJ64566.1 | oxidoreductase_[Bacillus_cereus]                                    | CPTF_AI         | 91540.76667 | 93273.265   | 101.8925976 |
| UIJ64566.1 | oxidoreductase_[Bacillus_cereus]                                    | CPTF_Cd         | 148743      | 45841.57707 | 30.81931726 |
| UIJ64566.1 | oxidoreductase_[Bacillus_cereus]                                    | CPTF_Co         | 54531.2     | 48641.24433 | 89.19892526 |
| UIJ64566.1 | oxidoreductase_[Bacillus_cereus]                                    | CPTF_Cu         | 162715      | 32318.71823 | 19.86216282 |
| UIJ64566.1 | oxidoreductase_[Bacillus_cereus]                                    | CPTF_Fe         | 52598       | 91102.40838 | 173.2050808 |

|            |                                                                                      |                 |             |             |             |
|------------|--------------------------------------------------------------------------------------|-----------------|-------------|-------------|-------------|
| UIJ64566.1 | oxidoreductase [Bacillus cereus]                                                     | CPTF_Mn         | 36436.66667 | 63110.15793 | 173.2050808 |
| UIJ64566.1 | oxidoreductase [Bacillus cereus]                                                     | CPTF_Ni         | 100188.3333 | 93149.57108 | 92.97446916 |
| UIJ64566.1 | oxidoreductase [Bacillus cereus]                                                     | CPTF_U          | 47573.33333 | 82399.43042 | 173.2050808 |
| UIJ64566.1 | oxidoreductase [Bacillus cereus]                                                     | CPTF_metals_mix | 104948.1    | 32215.96848 | 30.69704785 |
| UIJ64566.1 | oxidoreductase [Bacillus cereus]                                                     | CPTF_zcontrol   | 36888.26667 | 32441.43604 | 87.94513532 |
| UIJ64567.1 | DNA_topoisomerase_IV_subunit_A [Bacillus cereus]                                     | CPTF_Al         | 68439.43333 | 59585.19208 | 87.06266136 |
| UIJ64567.1 | DNA_topoisomerase_IV_subunit_A [Bacillus cereus]                                     | CPTF_Cd         | 37845.33333 | 65550.04016 | 173.2050808 |
| UIJ64567.1 | DNA_topoisomerase_IV_subunit_A [Bacillus cereus]                                     | CPTF_Co         | 121671.9    | 112503.6244 | 92.46475514 |
| UIJ64567.1 | DNA_topoisomerase_IV_subunit_A [Bacillus cereus]                                     | CPTF_Cu         | 60694.7     | 56662.40764 | 93.35643416 |
| UIJ64567.1 | DNA_topoisomerase_IV_subunit_A [Bacillus cereus]                                     | CPTF_Fe         | 9364.833333 | 16220.36714 | 173.2050808 |
| UIJ64567.1 | DNA_topoisomerase_IV_subunit_A [Bacillus cereus]                                     | CPTF_Mn         | 28300.7     | 49018.25029 | 173.2050808 |
| UIJ64567.1 | DNA_topoisomerase_IV_subunit_A [Bacillus cereus]                                     | CPTF_Ni         | 36699       | 63564.53259 | 173.2050808 |
| UIJ64567.1 | DNA_topoisomerase_IV_subunit_A [Bacillus cereus]                                     | CPTF_U          | 33060.13333 | 57261.83064 | 173.2050808 |
| UIJ64567.1 | DNA_topoisomerase_IV_subunit_A [Bacillus cereus]                                     | CPTF_metals_mix | 86380.1     | 37024.33582 | 42.86211271 |
| UIJ64567.1 | DNA_topoisomerase_IV_subunit_A [Bacillus cereus]                                     | CPTF_zcontrol   | 102820.4333 | 16315.26098 | 15.86772244 |
| UIJ64568.1 | DNA_topoisomerase_IV_subunit_B [Bacillus cereus]                                     | CPTF_Al         | 184826.3667 | 57487.65924 | 31.10360295 |
| UIJ64568.1 | DNA_topoisomerase_IV_subunit_B [Bacillus cereus]                                     | CPTF_Cd         | 166610.8333 | 113422.8487 | 68.07651484 |
| UIJ64568.1 | DNA_topoisomerase_IV_subunit_B [Bacillus cereus]                                     | CPTF_Co         | 170319.8333 | 71416.74761 | 41.93096377 |
| UIJ64568.1 | DNA_topoisomerase_IV_subunit_B [Bacillus cereus]                                     | CPTF_Cu         | 167461.4    | 63368.34366 | 37.84056723 |
| UIJ64568.1 | DNA_topoisomerase_IV_subunit_B [Bacillus cereus]                                     | CPTF_Fe         | 156670.7667 | 90884.17349 | 58.00965644 |
| UIJ64568.1 | DNA_topoisomerase_IV_subunit_B [Bacillus cereus]                                     | CPTF_Mn         | 69423.26667 | 76304.37646 | 109.9118208 |
| UIJ64568.1 | DNA_topoisomerase_IV_subunit_B [Bacillus cereus]                                     | CPTF_Ni         | 141803.1667 | 104671.7042 | 73.81478613 |
| UIJ64568.1 | DNA_topoisomerase_IV_subunit_B [Bacillus cereus]                                     | CPTF_U          | 20935.13333 | 36260.7146  | 173.2050808 |
| UIJ64568.1 | DNA_topoisomerase_IV_subunit_B [Bacillus cereus]                                     | CPTF_metals_mix | 173044.3667 | 48936.48382 | 28.2797324  |
| UIJ64568.1 | DNA_topoisomerase_IV_subunit_B [Bacillus cereus]                                     | CPTF_zcontrol   | 114911.2    | 63987.67679 | 55.68445617 |
| UIJ64569.1 | CoA-binding_protein [Bacillus cereus]                                                | CPTF_Al         | 3460746.667 | 180902.0653 | 5.22725352  |
| UIJ64569.1 | CoA-binding_protein [Bacillus cereus]                                                | CPTF_Cd         | 4493574.667 | 1170480.717 | 26.0478751  |
| UIJ64569.1 | CoA-binding_protein [Bacillus cereus]                                                | CPTF_Co         | 3026263.667 | 470505.6146 | 15.54740982 |
| UIJ64569.1 | CoA-binding_protein [Bacillus cereus]                                                | CPTF_Cu         | 3597813.667 | 241800.4796 | 6.720761608 |
| UIJ64569.1 | CoA-binding_protein [Bacillus cereus]                                                | CPTF_Fe         | 3220778.6   | 31066.82897 | 0.964575118 |
| UIJ64569.1 | CoA-binding_protein [Bacillus cereus]                                                | CPTF_Mn         | 3686432.233 | 554169.2533 | 15.03267165 |
| UIJ64569.1 | CoA-binding_protein [Bacillus cereus]                                                | CPTF_Ni         | 2316620.333 | 170342.0483 | 7.353041234 |
| UIJ64569.1 | CoA-binding_protein [Bacillus cereus]                                                | CPTF_U          | 2964198.3   | 257587.8691 | 8.689967506 |
| UIJ64569.1 | CoA-binding_protein [Bacillus cereus]                                                | CPTF_metals_mix | 3758785     | 256423.8145 | 6.821986747 |
| UIJ64569.1 | CoA-binding_protein [Bacillus cereus]                                                | CPTF_zcontrol   | 4407768.667 | 1075971.492 | 24.41079768 |
| UIJ64570.1 | trypsin-like_peptidase_domain-containing_protein [Bacillus cereus]                   | CPTF_Al         | 1329737.533 | 193397.95   | 14.54406942 |
| UIJ64570.1 | trypsin-like_peptidase_domain-containing_protein [Bacillus cereus]                   | CPTF_Cd         | 1369271.567 | 143463.6126 | 10.47736739 |
| UIJ64570.1 | trypsin-like_peptidase_domain-containing_protein [Bacillus cereus]                   | CPTF_Co         | 1150578.533 | 191657.2066 | 16.65746414 |
| UIJ64570.1 | trypsin-like_peptidase_domain-containing_protein [Bacillus cereus]                   | CPTF_Cu         | 2834554.733 | 85968.57756 | 3.03287767  |
| UIJ64570.1 | trypsin-like_peptidase_domain-containing_protein [Bacillus cereus]                   | CPTF_Fe         | 1202968.167 | 199896.1565 | 16.61691157 |
| UIJ64570.1 | trypsin-like_peptidase_domain-containing_protein [Bacillus cereus]                   | CPTF_Mn         | 1088446.5   | 117340.7199 | 10.78056845 |
| UIJ64570.1 | trypsin-like_peptidase_domain-containing_protein [Bacillus cereus]                   | CPTF_Ni         | 872215.7667 | 363781.9253 | 41.70779057 |
| UIJ64570.1 | trypsin-like_peptidase_domain-containing_protein [Bacillus cereus]                   | CPTF_U          | 838462.1333 | 338581.265  | 40.38122314 |
| UIJ64570.1 | trypsin-like_peptidase_domain-containing_protein [Bacillus cereus]                   | CPTF_metals_mix | 5154305.767 | 305232.4067 | 5.921891725 |
| UIJ64570.1 | trypsin-like_peptidase_domain-containing_protein [Bacillus cereus]                   | CPTF_zcontrol   | 1310315.333 | 109622.1587 | 8.366089893 |
| UIJ64571.1 | response_regulator_transcription_factor [Bacillus cereus]                            | CPTF_Al         | 1515865.167 | 300003.4664 | 19.79090707 |
| UIJ64571.1 | response_regulator_transcription_factor [Bacillus cereus]                            | CPTF_Cd         | 1336619.033 | 810670.3795 | 60.65081817 |
| UIJ64571.1 | response_regulator_transcription_factor [Bacillus cereus]                            | CPTF_Co         | 1385876.9   | 105206.774  | 7.591350574 |
| UIJ64571.1 | response_regulator_transcription_factor [Bacillus cereus]                            | CPTF_Cu         | 1389118.567 | 109417.8071 | 7.876779545 |
| UIJ64571.1 | response_regulator_transcription_factor [Bacillus cereus]                            | CPTF_Fe         | 1605016.533 | 202170.4978 | 12.59616294 |
| UIJ64571.1 | response_regulator_transcription_factor [Bacillus cereus]                            | CPTF_Mn         | 1633243.9   | 92289.37438 | 5.650679263 |
| UIJ64571.1 | response_regulator_transcription_factor [Bacillus cereus]                            | CPTF_Ni         | 1392852.2   | 61807.25392 | 4.437459619 |
| UIJ64571.1 | response_regulator_transcription_factor [Bacillus cereus]                            | CPTF_U          | 1642602.033 | 277849.1797 | 16.91518543 |
| UIJ64571.1 | response_regulator_transcription_factor [Bacillus cereus]                            | CPTF_metals_mix | 1689981.567 | 53057.49212 | 3.139530819 |
| UIJ64571.1 | response_regulator_transcription_factor [Bacillus cereus]                            | CPTF_zcontrol   | 1521205.5   | 260640.542  | 17.13381538 |
| UIJ64572.1 | anaerobic_ribonucleoside-triphosphate_reductase_activating_protein [Bacillus cereus] | CPTF_Al         | 81426.36667 | 3953.618122 | 4.855451967 |
| UIJ64572.1 | anaerobic_ribonucleoside-triphosphate_reductase_activating_protein [Bacillus cereus] | CPTF_Cd         | 27415.93333 | 23753.73957 | 86.64209708 |
| UIJ64572.1 | anaerobic_ribonucleoside-triphosphate_reductase_activating_protein [Bacillus cereus] | CPTF_Co         | 36977.06667 | 23165.44193 | 62.64813307 |
| UIJ64572.1 | anaerobic_ribonucleoside-triphosphate_reductase_activating_protein [Bacillus cereus] | CPTF_Cu         | 27626.66667 | 26321.72975 | 95.27653142 |
| UIJ64572.1 | anaerobic_ribonucleoside-triphosphate_reductase_activating_protein [Bacillus cereus] | CPTF_Fe         | 50706.26667 | 44698.5246  | 88.15187459 |
| UIJ64572.1 | anaerobic_ribonucleoside-triphosphate_reductase_activating_protein [Bacillus cereus] | CPTF_Mn         | 65393.73333 | 13918.88249 | 21.28473445 |

|            |                                                                                      |                 |             |             |             |
|------------|--------------------------------------------------------------------------------------|-----------------|-------------|-------------|-------------|
| UIJ64572.1 | anaerobic_ribonucleoside-triphosphate_reductase_activating_protein_[Bacillus_cereus] | CPTF_Ni         | 45168.46667 | 15763.12905 | 34.89852592 |
| UIJ64572.1 | anaerobic_ribonucleoside-triphosphate_reductase_activating_protein_[Bacillus_cereus] | CPTF_U          | 0           | 0           | 0           |
| UIJ64572.1 | anaerobic_ribonucleoside-triphosphate_reductase_activating_protein_[Bacillus_cereus] | CPTF_metals_mix | 4716.366667 | 8168.986694 | 173.2050808 |
| UIJ64572.1 | anaerobic_ribonucleoside-triphosphate_reductase_activating_protein_[Bacillus_cereus] | CPTF_zcontrol   | 62231.5     | 54302.86217 | 87.25944605 |
| UIJ64573.1 | anaerobic_ribonucleoside_triphosphate_reductase_[Bacillus_cereus]                    | CPTF_Al         | 776882.0333 | 128691.7645 | 16.56516163 |
| UIJ64573.1 | anaerobic_ribonucleoside_triphosphate_reductase_[Bacillus_cereus]                    | CPTF_Cd         | 599666.4333 | 133721.3582 | 22.29929021 |
| UIJ64573.1 | anaerobic_ribonucleoside_triphosphate_reductase_[Bacillus_cereus]                    | CPTF_Co         | 798002.4667 | 71300.01836 | 8.934811775 |
| UIJ64573.1 | anaerobic_ribonucleoside_triphosphate_reductase_[Bacillus_cereus]                    | CPTF_Cu         | 1025893.6   | 105388.8479 | 10.27288287 |
| UIJ64573.1 | anaerobic_ribonucleoside_triphosphate_reductase_[Bacillus_cereus]                    | CPTF_Fe         | 706971.7667 | 76119.36122 | 10.76695914 |
| UIJ64573.1 | anaerobic_ribonucleoside_triphosphate_reductase_[Bacillus_cereus]                    | CPTF_Mn         | 607789.8667 | 127073.1784 | 19.85936012 |
| UIJ64573.1 | anaerobic_ribonucleoside_triphosphate_reductase_[Bacillus_cereus]                    | CPTF_Ni         | 853489.8333 | 173434.7401 | 20.32065683 |
| UIJ64573.1 | anaerobic_ribonucleoside_triphosphate_reductase_[Bacillus_cereus]                    | CPTF_U          | 669010.4667 | 276912.6056 | 41.3913712  |
| UIJ64573.1 | anaerobic_ribonucleoside_triphosphate_reductase_[Bacillus_cereus]                    | CPTF_metals_mix | 1277694.033 | 170742.1201 | 13.36330261 |
| UIJ64573.1 | anaerobic_ribonucleoside_triphosphate_reductase_[Bacillus_cereus]                    | CPTF_zcontrol   | 755222.5333 | 22959.56131 | 3.040105438 |
| UIJ64574.1 | glycerol-3-phosphate_1-O-acyltransferase_PlsY_[Bacillus_cereus]                      | CPTF_Al         | 56156.13333 | 8178.868486 | 14.56451504 |
| UIJ64574.1 | glycerol-3-phosphate_1-O-acyltransferase_PlsY_[Bacillus_cereus]                      | CPTF_Cd         | 48594.26667 | 12844.35246 | 26.43182692 |
| UIJ64574.1 | glycerol-3-phosphate_1-O-acyltransferase_PlsY_[Bacillus_cereus]                      | CPTF_Co         | 51435.73333 | 11122.16219 | 21.62341522 |
| UIJ64574.1 | glycerol-3-phosphate_1-O-acyltransferase_PlsY_[Bacillus_cereus]                      | CPTF_Cu         | 52984.2     | 4759.162066 | 8.982228789 |
| UIJ64574.1 | glycerol-3-phosphate_1-O-acyltransferase_PlsY_[Bacillus_cereus]                      | CPTF_Fe         | 48418.53333 | 7413.551407 | 15.31139193 |
| UIJ64574.1 | glycerol-3-phosphate_1-O-acyltransferase_PlsY_[Bacillus_cereus]                      | CPTF_Mn         | 39819.66667 | 35786.4859  | 89.87138492 |
| UIJ64574.1 | glycerol-3-phosphate_1-O-acyltransferase_PlsY_[Bacillus_cereus]                      | CPTF_Ni         | 38063.36667 | 33610.52718 | 88.30150911 |
| UIJ64574.1 | glycerol-3-phosphate_1-O-acyltransferase_PlsY_[Bacillus_cereus]                      | CPTF_U          | 27735.66667 | 27053.10971 | 97.53906418 |
| UIJ64574.1 | glycerol-3-phosphate_1-O-acyltransferase_PlsY_[Bacillus_cereus]                      | CPTF_metals_mix | 37631.43333 | 6569.299284 | 17.45694677 |
| UIJ64574.1 | glycerol-3-phosphate_1-O-acyltransferase_PlsY_[Bacillus_cereus]                      | CPTF_zcontrol   | 45045.43333 | 6318.664382 | 14.02731401 |
| UIJ64576.1 | acyl-CoA_thioesterase_[Bacillus_cereus]                                              | CPTF_Al         | 522920.3333 | 75715.09679 | 14.47927953 |
| UIJ64576.1 | acyl-CoA_thioesterase_[Bacillus_cereus]                                              | CPTF_Cd         | 702549      | 21835.97424 | 3.108106942 |
| UIJ64576.1 | acyl-CoA_thioesterase_[Bacillus_cereus]                                              | CPTF_Co         | 529457      | 86698.91797 | 16.37506312 |
| UIJ64576.1 | acyl-CoA_thioesterase_[Bacillus_cereus]                                              | CPTF_Cu         | 531496.9667 | 28558.56652 | 5.373232268 |
| UIJ64576.1 | acyl-CoA_thioesterase_[Bacillus_cereus]                                              | CPTF_Fe         | 572968.3333 | 82882.59306 | 14.46547536 |
| UIJ64576.1 | acyl-CoA_thioesterase_[Bacillus_cereus]                                              | CPTF_Mn         | 349176.6667 | 325203.7309 | 93.13443936 |
| UIJ64576.1 | acyl-CoA_thioesterase_[Bacillus_cereus]                                              | CPTF_Ni         | 106266      | 184058.1111 | 173.2050808 |
| UIJ64576.1 | acyl-CoA_thioesterase_[Bacillus_cereus]                                              | CPTF_U          | 283534.6667 | 292439.5652 | 103.1406736 |
| UIJ64576.1 | acyl-CoA_thioesterase_[Bacillus_cereus]                                              | CPTF_metals_mix | 731348.9333 | 27833.95056 | 3.805837308 |
| UIJ64576.1 | acyl-CoA_thioesterase_[Bacillus_cereus]                                              | CPTF_zcontrol   | 548042.6667 | 130171.1726 | 23.7520143  |
| UIJ64582.1 | aconitate_hydratase_AcnA_[Bacillus_cereus]                                           | CPTF_Al         | 39958779.93 | 1664556.081 | 4.165682945 |
| UIJ64582.1 | aconitate_hydratase_AcnA_[Bacillus_cereus]                                           | CPTF_Cd         | 40686447.13 | 1063517.89  | 2.613936495 |
| UIJ64582.1 | aconitate_hydratase_AcnA_[Bacillus_cereus]                                           | CPTF_Co         | 38545995.9  | 4121095.327 | 10.69137074 |
| UIJ64582.1 | aconitate_hydratase_AcnA_[Bacillus_cereus]                                           | CPTF_Cu         | 37427698.67 | 2439913.539 | 6.519004976 |
| UIJ64582.1 | aconitate_hydratase_AcnA_[Bacillus_cereus]                                           | CPTF_Fe         | 39785849.93 | 724611.56   | 1.821279579 |
| UIJ64582.1 | aconitate_hydratase_AcnA_[Bacillus_cereus]                                           | CPTF_Mn         | 40522366.23 | 6697633.426 | 16.52823872 |
| UIJ64582.1 | aconitate_hydratase_AcnA_[Bacillus_cereus]                                           | CPTF_Ni         | 35669836.93 | 1519809.636 | 4.260769789 |
| UIJ64582.1 | aconitate_hydratase_AcnA_[Bacillus_cereus]                                           | CPTF_U          | 31364576.43 | 1454259.475 | 4.636630366 |
| UIJ64582.1 | aconitate_hydratase_AcnA_[Bacillus_cereus]                                           | CPTF_metals_mix | 38944800.3  | 2729631.402 | 7.008957519 |
| UIJ64582.1 | aconitate_hydratase_AcnA_[Bacillus_cereus]                                           | CPTF_zcontrol   | 37674479.4  | 1861130.013 | 4.940028482 |
| UIJ64600.1 | CsbD_family_protein_[Bacillus_cereus]                                                | CPTF_Al         | 1268153.267 | 114653.8671 | 9.041010269 |
| UIJ64600.1 | CsbD_family_protein_[Bacillus_cereus]                                                | CPTF_Cd         | 1197722.733 | 149337.1742 | 12.46842613 |
| UIJ64600.1 | CsbD_family_protein_[Bacillus_cereus]                                                | CPTF_Co         | 1117003.167 | 134916.9723 | 12.07847715 |
| UIJ64600.1 | CsbD_family_protein_[Bacillus_cereus]                                                | CPTF_Cu         | 1406322.467 | 96441.05495 | 6.857677185 |
| UIJ64600.1 | CsbD_family_protein_[Bacillus_cereus]                                                | CPTF_Fe         | 1249709.667 | 111167.3855 | 8.895456959 |
| UIJ64600.1 | CsbD_family_protein_[Bacillus_cereus]                                                | CPTF_Mn         | 1042794     | 93988.32757 | 9.013125082 |
| UIJ64600.1 | CsbD_family_protein_[Bacillus_cereus]                                                | CPTF_Ni         | 1299550     | 160636.2077 | 12.36091014 |
| UIJ64600.1 | CsbD_family_protein_[Bacillus_cereus]                                                | CPTF_U          | 1382498.333 | 563572.4483 | 40.7647832  |
| UIJ64600.1 | CsbD_family_protein_[Bacillus_cereus]                                                | CPTF_metals_mix | 1395382.333 | 21802.15369 | 1.562450173 |
| UIJ64600.1 | CsbD_family_protein_[Bacillus_cereus]                                                | CPTF_zcontrol   | 939306      | 316372.4121 | 33.68150657 |
| UIJ64612.1 | alkene_reductase_[Bacillus_cereus]                                                   | CPTF_Al         | 0           | 0           | 0           |
| UIJ64612.1 | alkene_reductase_[Bacillus_cereus]                                                   | CPTF_Cd         | 30775.16667 | 53304.15228 | 173.2050808 |
| UIJ64612.1 | alkene_reductase_[Bacillus_cereus]                                                   | CPTF_Co         | 0           | 0           | 0           |
| UIJ64612.1 | alkene_reductase_[Bacillus_cereus]                                                   | CPTF_Cu         | 10039.16667 | 17388.34673 | 173.2050808 |
| UIJ64612.1 | alkene_reductase_[Bacillus_cereus]                                                   | CPTF_Fe         | 0           | 0           | 0           |
| UIJ64612.1 | alkene_reductase_[Bacillus_cereus]                                                   | CPTF_Mn         | 13521.4     | 23419.75179 | 173.2050808 |
| UIJ64612.1 | alkene_reductase_[Bacillus_cereus]                                                   | CPTF_Ni         | 11662.76667 | 20200.50442 | 173.2050808 |



|            |                                                             |                 |             |             |             |
|------------|-------------------------------------------------------------|-----------------|-------------|-------------|-------------|
| UIJ64612.1 | alkene_reductase [Bacillus cereus]                          | CPTF_U          | 0           | 0           | 0           |
| UIJ64612.1 | alkene_reductase [Bacillus cereus]                          | CPTF_metals_mix | 92939.16667 | 38064.76386 | 40.95664425 |
| UIJ64612.1 | alkene_reductase [Bacillus cereus]                          | CPTF_zcontrol   | 0           | 0           | 0           |
| UIJ64615.1 | imidazolonepropionase [Bacillus cereus]                     | CPTF_Al         | 194052      | 20323.24991 | 10.4730948  |
| UIJ64615.1 | imidazolonepropionase [Bacillus cereus]                     | CPTF_Cd         | 234702      | 49062.17391 | 20.9040289  |
| UIJ64615.1 | imidazolonepropionase [Bacillus cereus]                     | CPTF_Co         | 157506.0333 | 88696.4257  | 56.31303374 |
| UIJ64615.1 | imidazolonepropionase [Bacillus cereus]                     | CPTF_Cu         | 67510.56667 | 62326.62322 | 92.32128584 |
| UIJ64615.1 | imidazolonepropionase [Bacillus cereus]                     | CPTF_Fe         | 200483.7667 | 41260.60044 | 20.58051937 |
| UIJ64615.1 | imidazolonepropionase [Bacillus cereus]                     | CPTF_Mn         | 122590.1333 | 109601.8979 | 89.40515429 |
| UIJ64615.1 | imidazolonepropionase [Bacillus cereus]                     | CPTF_Ni         | 128522.6667 | 111987.6226 | 87.13453084 |
| UIJ64615.1 | imidazolonepropionase [Bacillus cereus]                     | CPTF_U          | 202937.9333 | 177799.7469 | 87.61286958 |
| UIJ64615.1 | imidazolonepropionase [Bacillus cereus]                     | CPTF_metals_mix | 0           | 0           | 0           |
| UIJ64615.1 | imidazolonepropionase [Bacillus cereus]                     | CPTF_zcontrol   | 292685.6667 | 89238.04996 | 30.48938165 |
| UIJ64616.1 | urocanate_hydratase [Bacillus cereus]                       | CPTF_Al         | 1786848.233 | 249846.4121 | 13.98252003 |
| UIJ64616.1 | urocanate_hydratase [Bacillus cereus]                       | CPTF_Cd         | 1595063.233 | 102676.0167 | 6.43711262  |
| UIJ64616.1 | urocanate_hydratase [Bacillus cereus]                       | CPTF_Co         | 1717457.033 | 103686.9275 | 6.037235603 |
| UIJ64616.1 | urocanate_hydratase [Bacillus cereus]                       | CPTF_Cu         | 1396961.9   | 188340.3526 | 13.48213954 |
| UIJ64616.1 | urocanate_hydratase [Bacillus cereus]                       | CPTF_Fe         | 1544906.333 | 373020.5593 | 24.14518934 |
| UIJ64616.1 | urocanate_hydratase [Bacillus cereus]                       | CPTF_Mn         | 1549544.233 | 249052.4851 | 16.07262831 |
| UIJ64616.1 | urocanate_hydratase [Bacillus cereus]                       | CPTF_Ni         | 1693523.667 | 229089.4486 | 13.52738395 |
| UIJ64616.1 | urocanate_hydratase [Bacillus cereus]                       | CPTF_U          | 1369393.667 | 156087.8635 | 11.39831937 |
| UIJ64616.1 | urocanate_hydratase [Bacillus cereus]                       | CPTF_metals_mix | 831814.3667 | 119508.6021 | 14.36722025 |
| UIJ64616.1 | urocanate_hydratase [Bacillus cereus]                       | CPTF_zcontrol   | 1893386.7   | 102499.0519 | 5.413529727 |
| UIJ64617.1 | hut_operon_transcriptional_regulator_HutP [Bacillus cereus] | CPTF_Al         | 0           | 0           | 0           |
| UIJ64617.1 | hut_operon_transcriptional_regulator_HutP [Bacillus cereus] | CPTF_Cd         | 21665.53333 | 37525.80451 | 173.2050808 |
| UIJ64617.1 | hut_operon_transcriptional_regulator_HutP [Bacillus cereus] | CPTF_Co         | 0           | 0           | 0           |
| UIJ64617.1 | hut_operon_transcriptional_regulator_HutP [Bacillus cereus] | CPTF_Cu         | 19502.2     | 33778.80126 | 173.2050808 |
| UIJ64617.1 | hut_operon_transcriptional_regulator_HutP [Bacillus cereus] | CPTF_Fe         | 28202.1     | 48847.47008 | 173.2050808 |
| UIJ64617.1 | hut_operon_transcriptional_regulator_HutP [Bacillus cereus] | CPTF_Mn         | 0           | 0           | 0           |
| UIJ64617.1 | hut_operon_transcriptional_regulator_HutP [Bacillus cereus] | CPTF_Ni         | 0           | 0           | 0           |
| UIJ64617.1 | hut_operon_transcriptional_regulator_HutP [Bacillus cereus] | CPTF_U          | 17136.83333 | 29681.86601 | 173.2050808 |
| UIJ64617.1 | hut_operon_transcriptional_regulator_HutP [Bacillus cereus] | CPTF_metals_mix | 91670.66667 | 86139.02032 | 93.96574002 |
| UIJ64617.1 | hut_operon_transcriptional_regulator_HutP [Bacillus cereus] | CPTF_zcontrol   | 23897.86667 | 41392.31926 | 173.2050808 |
| UIJ64621.1 | hypothetical_protein_LW858_16650 [Bacillus cereus]          | CPTF_Al         | 0           | 0           | 0           |
| UIJ64621.1 | hypothetical_protein_LW858_16650 [Bacillus cereus]          | CPTF_Cd         | 0           | 0           | 0           |
| UIJ64621.1 | hypothetical_protein_LW858_16650 [Bacillus cereus]          | CPTF_Co         | 41818.1     | 43323.08213 | 103.5988774 |
| UIJ64621.1 | hypothetical_protein_LW858_16650 [Bacillus cereus]          | CPTF_Cu         | 38019.96667 | 35228.54451 | 92.65801    |
| UIJ64621.1 | hypothetical_protein_LW858_16650 [Bacillus cereus]          | CPTF_Fe         | 36034.66667 | 62413.8735  | 173.2050808 |
| UIJ64621.1 | hypothetical_protein_LW858_16650 [Bacillus cereus]          | CPTF_Mn         | 16052.56667 | 27803.86106 | 173.2050808 |
| UIJ64621.1 | hypothetical_protein_LW858_16650 [Bacillus cereus]          | CPTF_Ni         | 19450.66667 | 19147.89512 | 98.44338729 |
| UIJ64621.1 | hypothetical_protein_LW858_16650 [Bacillus cereus]          | CPTF_U          | 24555.5     | 42531.37361 | 173.2050808 |
| UIJ64621.1 | hypothetical_protein_LW858_16650 [Bacillus cereus]          | CPTF_metals_mix | 18006.6     | 31188.34607 | 173.2050808 |
| UIJ64621.1 | hypothetical_protein_LW858_16650 [Bacillus cereus]          | CPTF_zcontrol   | 10510.7     | 18205.06642 | 173.2050808 |
| UIJ64640.1 | YneF_family_protein [Bacillus cereus]                       | CPTF_Al         | 454476.3333 | 49653.66482 | 10.92546766 |
| UIJ64640.1 | YneF_family_protein [Bacillus cereus]                       | CPTF_Cd         | 467124.3333 | 61669.17634 | 13.20187623 |
| UIJ64640.1 | YneF_family_protein [Bacillus cereus]                       | CPTF_Co         | 630861.3333 | 50686.79381 | 8.03453804  |
| UIJ64640.1 | YneF_family_protein [Bacillus cereus]                       | CPTF_Cu         | 669211      | 22534.94901 | 3.367390705 |
| UIJ64640.1 | YneF_family_protein [Bacillus cereus]                       | CPTF_Fe         | 474947      | 95060.11167 | 20.01488833 |
| UIJ64640.1 | YneF_family_protein [Bacillus cereus]                       | CPTF_Mn         | 482793.3333 | 26127.69619 | 5.411776507 |
| UIJ64640.1 | YneF_family_protein [Bacillus cereus]                       | CPTF_Ni         | 572691.3333 | 58109.06293 | 10.14666358 |
| UIJ64640.1 | YneF_family_protein [Bacillus cereus]                       | CPTF_U          | 423433      | 110898.3715 | 26.19029963 |
| UIJ64640.1 | YneF_family_protein [Bacillus cereus]                       | CPTF_metals_mix | 807052.6667 | 38426.9617  | 4.761394551 |
| UIJ64640.1 | YneF_family_protein [Bacillus cereus]                       | CPTF_zcontrol   | 526838.6667 | 38566.447   | 7.320352404 |
| UIJ64642.1 | transketolase [Bacillus cereus]                             | CPTF_Al         | 17802388.17 | 540430.8648 | 3.035721162 |
| UIJ64642.1 | transketolase [Bacillus cereus]                             | CPTF_Cd         | 18368080.17 | 68985.68638 | 0.375573744 |
| UIJ64642.1 | transketolase [Bacillus cereus]                             | CPTF_Co         | 18476804.33 | 465119.3471 | 2.517314892 |
| UIJ64642.1 | transketolase [Bacillus cereus]                             | CPTF_Cu         | 18433281.03 | 250727.2751 | 1.360187992 |
| UIJ64642.1 | transketolase [Bacillus cereus]                             | CPTF_Fe         | 18053903.8  | 1033778.011 | 5.726063583 |
| UIJ64642.1 | transketolase [Bacillus cereus]                             | CPTF_Mn         | 18621564.87 | 1994030.907 | 10.7081812  |
| UIJ64642.1 | transketolase [Bacillus cereus]                             | CPTF_Ni         | 15351756.37 | 721455.2482 | 4.699496468 |
| UIJ64642.1 | transketolase [Bacillus cereus]                             | CPTF_U          | 14832030.43 | 1371136.101 | 9.244426155 |

|            |                                                                         |                 |             |             |             |
|------------|-------------------------------------------------------------------------|-----------------|-------------|-------------|-------------|
| UIJ64642.1 | transketolase [Bacillus cereus]                                         | CPTF_metals_mix | 22715530.27 | 527801.5864 | 2.323527473 |
| UIJ64642.1 | transketolase [Bacillus cereus]                                         | CPTF_zcontrol   | 17508398.87 | 912227.822  | 5.210229838 |
| UIJ64646.1 | DUF896_domain-containing_protein [Bacillus cereus]                      | CPTF_Al         | 105951.3333 | 92079.39722 | 86.90725668 |
| UIJ64646.1 | DUF896_domain-containing_protein [Bacillus cereus]                      | CPTF_Cd         | 205583.6667 | 24288.12914 | 11.81423093 |
| UIJ64646.1 | DUF896_domain-containing_protein [Bacillus cereus]                      | CPTF_Co         | 137865.1    | 44806.7362  | 32.50041976 |
| UIJ64646.1 | DUF896_domain-containing_protein [Bacillus cereus]                      | CPTF_Cu         | 104001.6667 | 90105.70578 | 86.63871327 |
| UIJ64646.1 | DUF896_domain-containing_protein [Bacillus cereus]                      | CPTF_Fe         | 116386      | 111594.3662 | 95.88298093 |
| UIJ64646.1 | DUF896_domain-containing_protein [Bacillus cereus]                      | CPTF_Mn         | 169325.6667 | 43598.01058 | 25.7480224  |
| UIJ64646.1 | DUF896_domain-containing_protein [Bacillus cereus]                      | CPTF_Ni         | 0           | 0           | 0           |
| UIJ64646.1 | DUF896_domain-containing_protein [Bacillus cereus]                      | CPTF_U          | 0           | 0           | 0           |
| UIJ64646.1 | DUF896_domain-containing_protein [Bacillus cereus]                      | CPTF_metals_mix | 589479      | 84180.39766 | 14.2804744  |
| UIJ64646.1 | DUF896_domain-containing_protein [Bacillus cereus]                      | CPTF_zcontrol   | 103606.3333 | 90814.06574 | 87.65300616 |
| UIJ64648.1 | transcriptional_repressor_LexA [Bacillus cereus]                        | CPTF_Al         | 1012747.767 | 13585.90863 | 1.341489863 |
| UIJ64648.1 | transcriptional_repressor_LexA [Bacillus cereus]                        | CPTF_Cd         | 1139826.067 | 104305.0246 | 9.150959754 |
| UIJ64648.1 | transcriptional_repressor_LexA [Bacillus cereus]                        | CPTF_Co         | 936839.3333 | 58544.59826 | 6.249161001 |
| UIJ64648.1 | transcriptional_repressor_LexA [Bacillus cereus]                        | CPTF_Cu         | 899175.7333 | 122363.1937 | 13.60837367 |
| UIJ64648.1 | transcriptional_repressor_LexA [Bacillus cereus]                        | CPTF_Fe         | 1160924.8   | 71280.23986 | 6.139953239 |
| UIJ64648.1 | transcriptional_repressor_LexA [Bacillus cereus]                        | CPTF_Mn         | 805463.1667 | 577918.1493 | 71.74979233 |
| UIJ64648.1 | transcriptional_repressor_LexA [Bacillus cereus]                        | CPTF_Ni         | 984651.7667 | 117530.223  | 11.93622222 |
| UIJ64648.1 | transcriptional_repressor_LexA [Bacillus cereus]                        | CPTF_U          | 1228110.667 | 115862.4923 | 9.434206172 |
| UIJ64648.1 | transcriptional_repressor_LexA [Bacillus cereus]                        | CPTF_metals_mix | 818416      | 92760.59865 | 11.33416241 |
| UIJ64648.1 | transcriptional_repressor_LexA [Bacillus cereus]                        | CPTF_zcontrol   | 1083721.667 | 63567.79568 | 5.865693991 |
| UIJ64659.1 | type_I_glutamate--ammonia_ligase [Bacillus cereus]                      | CPTF_Al         | 9770089.233 | 1012860.162 | 10.36694894 |
| UIJ64659.1 | type_I_glutamate--ammonia_ligase [Bacillus cereus]                      | CPTF_Cd         | 10120730.43 | 755439.9663 | 7.46428305  |
| UIJ64659.1 | type_I_glutamate--ammonia_ligase [Bacillus cereus]                      | CPTF_Co         | 10209888.77 | 728952.4735 | 7.13967106  |
| UIJ64659.1 | type_I_glutamate--ammonia_ligase [Bacillus cereus]                      | CPTF_Cu         | 10046681.8  | 673557.7681 | 6.704280891 |
| UIJ64659.1 | type_I_glutamate--ammonia_ligase [Bacillus cereus]                      | CPTF_Fe         | 10350908.87 | 625448.4991 | 6.04245006  |
| UIJ64659.1 | type_I_glutamate--ammonia_ligase [Bacillus cereus]                      | CPTF_Mn         | 10806140.67 | 437919.7351 | 4.052508186 |
| UIJ64659.1 | type_I_glutamate--ammonia_ligase [Bacillus cereus]                      | CPTF_Ni         | 10164206.63 | 548273.3742 | 5.394158088 |
| UIJ64659.1 | type_I_glutamate--ammonia_ligase [Bacillus cereus]                      | CPTF_U          | 10670999    | 1542142.676 | 14.45171793 |
| UIJ64659.1 | type_I_glutamate--ammonia_ligase [Bacillus cereus]                      | CPTF_metals_mix | 11343743.83 | 1465801.656 | 12.92167452 |
| UIJ64659.1 | type_I_glutamate--ammonia_ligase [Bacillus cereus]                      | CPTF_zcontrol   | 10421341.23 | 95264.89228 | 0.914132741 |
| UIJ64665.1 | tyrosine-type_recombinase/integrase [Bacillus cereus]                   | CPTF_Al         | 44235.96667 | 42901.15429 | 96.9825179  |
| UIJ64665.1 | tyrosine-type_recombinase/integrase [Bacillus cereus]                   | CPTF_Cd         | 92917.13333 | 16819.03701 | 18.10111484 |
| UIJ64665.1 | tyrosine-type_recombinase/integrase [Bacillus cereus]                   | CPTF_Co         | 99036.26667 | 90805.19646 | 91.6888323  |
| UIJ64665.1 | tyrosine-type_recombinase/integrase [Bacillus cereus]                   | CPTF_Cu         | 161971.6333 | 44794.19586 | 27.65558076 |
| UIJ64665.1 | tyrosine-type_recombinase/integrase [Bacillus cereus]                   | CPTF_Fe         | 73869.73333 | 19970.62971 | 27.03492866 |
| UIJ64665.1 | tyrosine-type_recombinase/integrase [Bacillus cereus]                   | CPTF_Mn         | 19630.16667 | 34000.44603 | 173.2050808 |
| UIJ64665.1 | tyrosine-type_recombinase/integrase [Bacillus cereus]                   | CPTF_Ni         | 38859.8     | 33882.85782 | 87.19256872 |
| UIJ64665.1 | tyrosine-type_recombinase/integrase [Bacillus cereus]                   | CPTF_U          | 0           | 0           | 0           |
| UIJ64665.1 | tyrosine-type_recombinase/integrase [Bacillus cereus]                   | CPTF_metals_mix | 275987.9667 | 79322.81893 | 28.74140489 |
| UIJ64665.1 | tyrosine-type_recombinase/integrase [Bacillus cereus]                   | CPTF_zcontrol   | 33644.8     | 29143.88547 | 86.62225804 |
| UIJ64666.1 | RNA_chaperone_Hfq [Bacillus cereus]                                     | CPTF_Al         | 332772.3333 | 292575.5316 | 87.9206299  |
| UIJ64666.1 | RNA_chaperone_Hfq [Bacillus cereus]                                     | CPTF_Cd         | 65528.43333 | 73829.28869 | 112.6675627 |
| UIJ64666.1 | RNA_chaperone_Hfq [Bacillus cereus]                                     | CPTF_Co         | 401518.3333 | 107680.8766 | 26.81842089 |
| UIJ64666.1 | RNA_chaperone_Hfq [Bacillus cereus]                                     | CPTF_Cu         | 474937      | 70363.43071 | 14.81531881 |
| UIJ64666.1 | RNA_chaperone_Hfq [Bacillus cereus]                                     | CPTF_Fe         | 278800.6    | 264270.1822 | 94.78824012 |
| UIJ64666.1 | RNA_chaperone_Hfq [Bacillus cereus]                                     | CPTF_Mn         | 114503      | 198325.0136 | 173.2050808 |
| UIJ64666.1 | RNA_chaperone_Hfq [Bacillus cereus]                                     | CPTF_Ni         | 183898.2667 | 318521.1413 | 173.2050808 |
| UIJ64666.1 | RNA_chaperone_Hfq [Bacillus cereus]                                     | CPTF_U          | 265409.5333 | 289827.9858 | 109.2002921 |
| UIJ64666.1 | RNA_chaperone_Hfq [Bacillus cereus]                                     | CPTF_metals_mix | 844777.2    | 103498.2645 | 12.25154567 |
| UIJ64666.1 | RNA_chaperone_Hfq [Bacillus cereus]                                     | CPTF_zcontrol   | 118191.8333 | 140774.0901 | 119.1064442 |
| UIJ64667.1 | tRNA_(adenosine(37)-N6)-dimethylallyltransferase_MiaA [Bacillus cereus] | CPTF_Al         | 0           | 0           | 0           |
| UIJ64667.1 | tRNA_(adenosine(37)-N6)-dimethylallyltransferase_MiaA [Bacillus cereus] | CPTF_Cd         | 0           | 0           | 0           |
| UIJ64667.1 | tRNA_(adenosine(37)-N6)-dimethylallyltransferase_MiaA [Bacillus cereus] | CPTF_Co         | 0           | 0           | 0           |
| UIJ64667.1 | tRNA_(adenosine(37)-N6)-dimethylallyltransferase_MiaA [Bacillus cereus] | CPTF_Cu         | 9903.733333 | 17153.76932 | 173.2050808 |
| UIJ64667.1 | tRNA_(adenosine(37)-N6)-dimethylallyltransferase_MiaA [Bacillus cereus] | CPTF_Fe         | 0           | 0           | 0           |
| UIJ64667.1 | tRNA_(adenosine(37)-N6)-dimethylallyltransferase_MiaA [Bacillus cereus] | CPTF_Mn         | 0           | 0           | 0           |
| UIJ64667.1 | tRNA_(adenosine(37)-N6)-dimethylallyltransferase_MiaA [Bacillus cereus] | CPTF_Ni         | 0           | 0           | 0           |
| UIJ64667.1 | tRNA_(adenosine(37)-N6)-dimethylallyltransferase_MiaA [Bacillus cereus] | CPTF_U          | 0           | 0           | 0           |
| UIJ64667.1 | tRNA_(adenosine(37)-N6)-dimethylallyltransferase_MiaA [Bacillus cereus] | CPTF_metals_mix | 35142.53333 | 10571.44607 | 30.08162779 |

|            |                                                                              |                 |             |             |             |
|------------|------------------------------------------------------------------------------|-----------------|-------------|-------------|-------------|
| UIJ64667.1 | tRNA (adenosine(37)-N6)-dimethylallyltransferase_MiaA [Bacillus_cereus]      | CPTF_zcontrol   | 0           | 0           | 0           |
| UIJ64673.1 | iron-containing_alcohol_dehydrogenase [Bacillus_cereus]                      | CPTF_Al         | 513799.3667 | 107650.995  | 20.95195168 |
| UIJ64673.1 | iron-containing_alcohol_dehydrogenase [Bacillus_cereus]                      | CPTF_Cd         | 482779.6667 | 102210.1025 | 21.1711697  |
| UIJ64673.1 | iron-containing_alcohol_dehydrogenase [Bacillus_cereus]                      | CPTF_Co         | 442968      | 31078.95087 | 7.016071334 |
| UIJ64673.1 | iron-containing_alcohol_dehydrogenase [Bacillus_cereus]                      | CPTF_Cu         | 670792.4333 | 127788.6066 | 19.05039476 |
| UIJ64673.1 | iron-containing_alcohol_dehydrogenase [Bacillus_cereus]                      | CPTF_Fe         | 523483.3333 | 103019.5797 | 19.67962934 |
| UIJ64673.1 | iron-containing_alcohol_dehydrogenase [Bacillus_cereus]                      | CPTF_Mn         | 420698.2667 | 99840.42855 | 23.73207509 |
| UIJ64673.1 | iron-containing_alcohol_dehydrogenase [Bacillus_cereus]                      | CPTF_Ni         | 514565.3333 | 207674.4964 | 40.35920863 |
| UIJ64673.1 | iron-containing_alcohol_dehydrogenase [Bacillus_cereus]                      | CPTF_U          | 650359.6667 | 69032.39657 | 10.61449535 |
| UIJ64673.1 | iron-containing_alcohol_dehydrogenase [Bacillus_cereus]                      | CPTF_metals_mix | 963853.4    | 67344.4503  | 6.987001374 |
| UIJ64673.1 | iron-containing_alcohol_dehydrogenase [Bacillus_cereus]                      | CPTF_zcontrol   | 577938      | 65181.41108 | 11.27827052 |
| UIJ64680.1 | HU_family_DNA-binding_protein [Bacillus_cereus]                              | CPTF_Al         | 644481.4067 | 35779.22147 | 5.551629745 |
| UIJ64680.1 | HU_family_DNA-binding_protein [Bacillus_cereus]                              | CPTF_Cd         | 597502.6667 | 162760.4076 | 27.240114   |
| UIJ64680.1 | HU_family_DNA-binding_protein [Bacillus_cereus]                              | CPTF_Co         | 716137.6    | 82130.09917 | 11.46848024 |
| UIJ64680.1 | HU_family_DNA-binding_protein [Bacillus_cereus]                              | CPTF_Cu         | 847873.3333 | 67878.41967 | 8.005726445 |
| UIJ64680.1 | HU_family_DNA-binding_protein [Bacillus_cereus]                              | CPTF_Fe         | 521652.9    | 143918.0143 | 27.58884583 |
| UIJ64680.1 | HU_family_DNA-binding_protein [Bacillus_cereus]                              | CPTF_Mn         | 519474.4333 | 67341.58532 | 12.96340705 |
| UIJ64680.1 | HU_family_DNA-binding_protein [Bacillus_cereus]                              | CPTF_Ni         | 671826.9667 | 55620.39114 | 8.278975674 |
| UIJ64680.1 | HU_family_DNA-binding_protein [Bacillus_cereus]                              | CPTF_U          | 358094.6667 | 42308.6534  | 11.81493536 |
| UIJ64680.1 | HU_family_DNA-binding_protein [Bacillus_cereus]                              | CPTF_metals_mix | 899542.0333 | 121301.7692 | 13.48483614 |
| UIJ64680.1 | HU_family_DNA-binding_protein [Bacillus_cereus]                              | CPTF_zcontrol   | 503635.1667 | 99825.459   | 19.82098662 |
| UIJ64682.1 | heavy_metal_translocating_P-type_ATPase [Bacillus_cereus]                    | CPTF_Al         | 0           | 0           | 0           |
| UIJ64682.1 | heavy_metal_translocating_P-type_ATPase [Bacillus_cereus]                    | CPTF_Cd         | 0           | 0           | 0           |
| UIJ64682.1 | heavy_metal_translocating_P-type_ATPase [Bacillus_cereus]                    | CPTF_Co         | 0           | 0           | 0           |
| UIJ64682.1 | heavy_metal_translocating_P-type_ATPase [Bacillus_cereus]                    | CPTF_Cu         | 0           | 0           | 0           |
| UIJ64682.1 | heavy_metal_translocating_P-type_ATPase [Bacillus_cereus]                    | CPTF_Fe         | 0           | 0           | 0           |
| UIJ64682.1 | heavy_metal_translocating_P-type_ATPase [Bacillus_cereus]                    | CPTF_Mn         | 0           | 0           | 0           |
| UIJ64682.1 | heavy_metal_translocating_P-type_ATPase [Bacillus_cereus]                    | CPTF_Ni         | 0           | 0           | 0           |
| UIJ64682.1 | heavy_metal_translocating_P-type_ATPase [Bacillus_cereus]                    | CPTF_U          | 0           | 0           | 0           |
| UIJ64682.1 | heavy_metal_translocating_P-type_ATPase [Bacillus_cereus]                    | CPTF_metals_mix | 61160.86667 | 22309.70835 | 36.47709649 |
| UIJ64682.1 | heavy_metal_translocating_P-type_ATPase [Bacillus_cereus]                    | CPTF_zcontrol   | 0           | 0           | 0           |
| UIJ64683.1 | copper_chaperone_CopZ [Bacillus_cereus]                                      | CPTF_Al         | 0           | 0           | 0           |
| UIJ64683.1 | copper_chaperone_CopZ [Bacillus_cereus]                                      | CPTF_Cd         | 7578.4      | 13126.17384 | 173.2050808 |
| UIJ64683.1 | copper_chaperone_CopZ [Bacillus_cereus]                                      | CPTF_Co         | 18677.4     | 16361.82117 | 87.60224214 |
| UIJ64683.1 | copper_chaperone_CopZ [Bacillus_cereus]                                      | CPTF_Cu         | 126007.6667 | 109587.139  | 86.96862806 |
| UIJ64683.1 | copper_chaperone_CopZ [Bacillus_cereus]                                      | CPTF_Fe         | 0           | 0           | 0           |
| UIJ64683.1 | copper_chaperone_CopZ [Bacillus_cereus]                                      | CPTF_Mn         | 0           | 0           | 0           |
| UIJ64683.1 | copper_chaperone_CopZ [Bacillus_cereus]                                      | CPTF_Ni         | 57373.86667 | 22999.73536 | 40.08747658 |
| UIJ64683.1 | copper_chaperone_CopZ [Bacillus_cereus]                                      | CPTF_U          | 0           | 0           | 0           |
| UIJ64683.1 | copper_chaperone_CopZ [Bacillus_cereus]                                      | CPTF_metals_mix | 418628.3333 | 49950.09496 | 11.93184765 |
| UIJ64683.1 | copper_chaperone_CopZ [Bacillus_cereus]                                      | CPTF_zcontrol   | 0           | 0           | 0           |
| UIJ64690.1 | iron-hydroxamate_ABC_transporter_substrate-binding_protein [Bacillus_cereus] | CPTF_Al         | 0           | 0           | 0           |
| UIJ64690.1 | iron-hydroxamate_ABC_transporter_substrate-binding_protein [Bacillus_cereus] | CPTF_Cd         | 52392.96667 | 53902.62358 | 102.8814114 |
| UIJ64690.1 | iron-hydroxamate_ABC_transporter_substrate-binding_protein [Bacillus_cereus] | CPTF_Co         | 52560.33333 | 91037.1678  | 173.2050808 |
| UIJ64690.1 | iron-hydroxamate_ABC_transporter_substrate-binding_protein [Bacillus_cereus] | CPTF_Cu         | 1057220.4   | 121993.1932 | 11.53905025 |
| UIJ64690.1 | iron-hydroxamate_ABC_transporter_substrate-binding_protein [Bacillus_cereus] | CPTF_Fe         | 0           | 0           | 0           |
| UIJ64690.1 | iron-hydroxamate_ABC_transporter_substrate-binding_protein [Bacillus_cereus] | CPTF_Mn         | 54598.03333 | 60980.08811 | 111.6891661 |
| UIJ64690.1 | iron-hydroxamate_ABC_transporter_substrate-binding_protein [Bacillus_cereus] | CPTF_Ni         | 0           | 0           | 0           |
| UIJ64690.1 | iron-hydroxamate_ABC_transporter_substrate-binding_protein [Bacillus_cereus] | CPTF_U          | 0           | 0           | 0           |
| UIJ64690.1 | iron-hydroxamate_ABC_transporter_substrate-binding_protein [Bacillus_cereus] | CPTF_metals_mix | 1934260.533 | 72555.35151 | 3.751064051 |
| UIJ64690.1 | iron-hydroxamate_ABC_transporter_substrate-binding_protein [Bacillus_cereus] | CPTF_zcontrol   | 0           | 0           | 0           |
| UIJ64695.1 | peptidase_T [Bacillus_cereus]                                                | CPTF_Al         | 801034.3667 | 70908.13567 | 8.852071599 |
| UIJ64695.1 | peptidase_T [Bacillus_cereus]                                                | CPTF_Cd         | 816874.1333 | 28898.31492 | 3.537670461 |
| UIJ64695.1 | peptidase_T [Bacillus_cereus]                                                | CPTF_Co         | 540809.6667 | 128404.5316 | 23.74301709 |
| UIJ64695.1 | peptidase_T [Bacillus_cereus]                                                | CPTF_Cu         | 574867.0667 | 84783.40978 | 14.74835048 |
| UIJ64695.1 | peptidase_T [Bacillus_cereus]                                                | CPTF_Fe         | 670649.3667 | 83946.04083 | 12.51712818 |
| UIJ64695.1 | peptidase_T [Bacillus_cereus]                                                | CPTF_Mn         | 516760.8333 | 106977.8154 | 20.7016106  |
| UIJ64695.1 | peptidase_T [Bacillus_cereus]                                                | CPTF_Ni         | 467366.3333 | 104177.9581 | 22.29042845 |
| UIJ64695.1 | peptidase_T [Bacillus_cereus]                                                | CPTF_U          | 419871.9667 | 188236.6296 | 44.83191175 |
| UIJ64695.1 | peptidase_T [Bacillus_cereus]                                                | CPTF_metals_mix | 1006478.733 | 153796.986  | 15.28069902 |
| UIJ64695.1 | peptidase_T [Bacillus_cereus]                                                | CPTF_zcontrol   | 536448.1333 | 79030.92727 | 14.73225879 |

|            |                                                                                     |                 |             |             |             |
|------------|-------------------------------------------------------------------------------------|-----------------|-------------|-------------|-------------|
| UIJ64720.1 | DNA_mismatch_repair_endonuclease_MutL_[Bacillus_cereus]                             | CPTF_AI         | 0           | 0           | 0           |
| UIJ64720.1 | DNA_mismatch_repair_endonuclease_MutL_[Bacillus_cereus]                             | CPTF_Cd         | 7343.466667 | 12719.25737 | 173.2050808 |
| UIJ64720.1 | DNA_mismatch_repair_endonuclease_MutL_[Bacillus_cereus]                             | CPTF_Co         | 0           | 0           | 0           |
| UIJ64720.1 | DNA_mismatch_repair_endonuclease_MutL_[Bacillus_cereus]                             | CPTF_Cu         | 0           | 0           | 0           |
| UIJ64720.1 | DNA_mismatch_repair_endonuclease_MutL_[Bacillus_cereus]                             | CPTF_Fe         | 0           | 0           | 0           |
| UIJ64720.1 | DNA_mismatch_repair_endonuclease_MutL_[Bacillus_cereus]                             | CPTF_Mn         | 0           | 0           | 0           |
| UIJ64720.1 | DNA_mismatch_repair_endonuclease_MutL_[Bacillus_cereus]                             | CPTF_Ni         | 0           | 0           | 0           |
| UIJ64720.1 | DNA_mismatch_repair_endonuclease_MutL_[Bacillus_cereus]                             | CPTF_U          | 0           | 0           | 0           |
| UIJ64720.1 | DNA_mismatch_repair_endonuclease_MutL_[Bacillus_cereus]                             | CPTF_metals_mix | 94162.6     | 24601.46896 | 26.12658206 |
| UIJ64720.1 | DNA_mismatch_repair_endonuclease_MutL_[Bacillus_cereus]                             | CPTF_zcontrol   | 0           | 0           | 0           |
| UIJ64721.1 | DNA_mismatch_repair_protein_MutS_[Bacillus_cereus]                                  | CPTF_AI         | 444210.3333 | 46165.70775 | 10.39275863 |
| UIJ64721.1 | DNA_mismatch_repair_protein_MutS_[Bacillus_cereus]                                  | CPTF_Cd         | 434400.3667 | 10225.08625 | 2.353839231 |
| UIJ64721.1 | DNA_mismatch_repair_protein_MutS_[Bacillus_cereus]                                  | CPTF_Co         | 390446.9    | 31142.56863 | 7.976134176 |
| UIJ64721.1 | DNA_mismatch_repair_protein_MutS_[Bacillus_cereus]                                  | CPTF_Cu         | 437118.6667 | 103565.5661 | 23.69278048 |
| UIJ64721.1 | DNA_mismatch_repair_protein_MutS_[Bacillus_cereus]                                  | CPTF_Fe         | 437727.3333 | 25898.38652 | 5.916556849 |
| UIJ64721.1 | DNA_mismatch_repair_protein_MutS_[Bacillus_cereus]                                  | CPTF_Mn         | 388991.5667 | 25817.43894 | 6.637017651 |
| UIJ64721.1 | DNA_mismatch_repair_protein_MutS_[Bacillus_cereus]                                  | CPTF_Ni         | 321889.4667 | 38389.59018 | 11.92632694 |
| UIJ64721.1 | DNA_mismatch_repair_protein_MutS_[Bacillus_cereus]                                  | CPTF_U          | 388346.7667 | 26024.51241 | 6.701359364 |
| UIJ64721.1 | DNA_mismatch_repair_protein_MutS_[Bacillus_cereus]                                  | CPTF_metals_mix | 284748.9    | 22911.67868 | 8.046274693 |
| UIJ64721.1 | DNA_mismatch_repair_protein_MutS_[Bacillus_cereus]                                  | CPTF_zcontrol   | 418895.5333 | 28895.55887 | 6.89803461  |
| UIJ64724.1 | tRNA_(N6-isopentenyl_adenosine(37)-C2)-methylthiotransferase_MiaB_[Bacillus_cereus] | CPTF_AI         | 1158247.133 | 280156.3317 | 24.18795814 |
| UIJ64724.1 | tRNA_(N6-isopentenyl_adenosine(37)-C2)-methylthiotransferase_MiaB_[Bacillus_cereus] | CPTF_Cd         | 1391208.633 | 241654.6319 | 17.37012164 |
| UIJ64724.1 | tRNA_(N6-isopentenyl_adenosine(37)-C2)-methylthiotransferase_MiaB_[Bacillus_cereus] | CPTF_Co         | 1274054.667 | 268468.3695 | 21.07196626 |
| UIJ64724.1 | tRNA_(N6-isopentenyl_adenosine(37)-C2)-methylthiotransferase_MiaB_[Bacillus_cereus] | CPTF_Cu         | 1170559.733 | 368328.732  | 31.46603471 |
| UIJ64724.1 | tRNA_(N6-isopentenyl_adenosine(37)-C2)-methylthiotransferase_MiaB_[Bacillus_cereus] | CPTF_Fe         | 1079778     | 400194.1175 | 37.06262931 |
| UIJ64724.1 | tRNA_(N6-isopentenyl_adenosine(37)-C2)-methylthiotransferase_MiaB_[Bacillus_cereus] | CPTF_Mn         | 1147376.5   | 501821.4129 | 43.73642069 |
| UIJ64724.1 | tRNA_(N6-isopentenyl_adenosine(37)-C2)-methylthiotransferase_MiaB_[Bacillus_cereus] | CPTF_Ni         | 1115628.133 | 179320.4713 | 16.0734985  |
| UIJ64724.1 | tRNA_(N6-isopentenyl_adenosine(37)-C2)-methylthiotransferase_MiaB_[Bacillus_cereus] | CPTF_U          | 917977.6667 | 222836.4597 | 24.27471471 |
| UIJ64724.1 | tRNA_(N6-isopentenyl_adenosine(37)-C2)-methylthiotransferase_MiaB_[Bacillus_cereus] | CPTF_metals_mix | 1563639.1   | 231535.832  | 14.80749823 |
| UIJ64724.1 | tRNA_(N6-isopentenyl_adenosine(37)-C2)-methylthiotransferase_MiaB_[Bacillus_cereus] | CPTF_zcontrol   | 787007.8    | 575402.0197 | 73.11261968 |
| UIJ64725.1 | 2-oxoacid:ferredoxin_oxidoreductase_subunit_beta_[Bacillus_cereus]                  | CPTF_AI         | 1326086.1   | 424392.0062 | 32.00335229 |
| UIJ64725.1 | 2-oxoacid:ferredoxin_oxidoreductase_subunit_beta_[Bacillus_cereus]                  | CPTF_Cd         | 905682.9667 | 142361.5095 | 15.71869128 |
| UIJ64725.1 | 2-oxoacid:ferredoxin_oxidoreductase_subunit_beta_[Bacillus_cereus]                  | CPTF_Co         | 1160003.4   | 610016.7375 | 52.58749565 |
| UIJ64725.1 | 2-oxoacid:ferredoxin_oxidoreductase_subunit_beta_[Bacillus_cereus]                  | CPTF_Cu         | 1461016.433 | 947793.7447 | 64.87221657 |
| UIJ64725.1 | 2-oxoacid:ferredoxin_oxidoreductase_subunit_beta_[Bacillus_cereus]                  | CPTF_Fe         | 945402.7667 | 549948.6438 | 58.17083081 |
| UIJ64725.1 | 2-oxoacid:ferredoxin_oxidoreductase_subunit_beta_[Bacillus_cereus]                  | CPTF_Mn         | 1266174.433 | 541463.6867 | 42.76375138 |
| UIJ64725.1 | 2-oxoacid:ferredoxin_oxidoreductase_subunit_beta_[Bacillus_cereus]                  | CPTF_Ni         | 961134.8333 | 360386.8546 | 37.49597268 |
| UIJ64725.1 | 2-oxoacid:ferredoxin_oxidoreductase_subunit_beta_[Bacillus_cereus]                  | CPTF_U          | 807310.0667 | 48633.49146 | 6.024140348 |
| UIJ64725.1 | 2-oxoacid:ferredoxin_oxidoreductase_subunit_beta_[Bacillus_cereus]                  | CPTF_metals_mix | 1434029.967 | 607414.2151 | 42.35714938 |
| UIJ64725.1 | 2-oxoacid:ferredoxin_oxidoreductase_subunit_beta_[Bacillus_cereus]                  | CPTF_zcontrol   | 1124649.433 | 485177.0804 | 43.14029474 |
| UIJ64726.1 | 2-oxoacid:acceptor_oxidoreductase_subunit_alpha_[Bacillus_cereus]                   | CPTF_AI         | 6318594.333 | 203246.987  | 3.216648771 |
| UIJ64726.1 | 2-oxoacid:acceptor_oxidoreductase_subunit_alpha_[Bacillus_cereus]                   | CPTF_Cd         | 6133859     | 175975.6623 | 2.868922522 |
| UIJ64726.1 | 2-oxoacid:acceptor_oxidoreductase_subunit_alpha_[Bacillus_cereus]                   | CPTF_Co         | 5779206.233 | 406583.4244 | 7.035281455 |
| UIJ64726.1 | 2-oxoacid:acceptor_oxidoreductase_subunit_alpha_[Bacillus_cereus]                   | CPTF_Cu         | 6506998.667 | 295617.2434 | 4.54306599  |
| UIJ64726.1 | 2-oxoacid:acceptor_oxidoreductase_subunit_alpha_[Bacillus_cereus]                   | CPTF_Fe         | 5960237.2   | 319819.5308 | 5.365885955 |
| UIJ64726.1 | 2-oxoacid:acceptor_oxidoreductase_subunit_alpha_[Bacillus_cereus]                   | CPTF_Mn         | 5884803.333 | 630615.372  | 10.7159974  |
| UIJ64726.1 | 2-oxoacid:acceptor_oxidoreductase_subunit_alpha_[Bacillus_cereus]                   | CPTF_Ni         | 6373256.333 | 317640.0895 | 4.984656741 |
| UIJ64726.1 | 2-oxoacid:acceptor_oxidoreductase_subunit_alpha_[Bacillus_cereus]                   | CPTF_U          | 6006466.367 | 748374.5118 | 12.4594806  |
| UIJ64726.1 | 2-oxoacid:acceptor_oxidoreductase_subunit_alpha_[Bacillus_cereus]                   | CPTF_metals_mix | 6784586.367 | 292984.0511 | 4.318377499 |
| UIJ64726.1 | 2-oxoacid:acceptor_oxidoreductase_subunit_alpha_[Bacillus_cereus]                   | CPTF_zcontrol   | 6096010.667 | 226974.759  | 3.723332707 |
| UIJ64728.1 | stage_V_sporulation_protein_SpoVS_[Bacillus_cereus]                                 | CPTF_AI         | 3392491.667 | 503974.5744 | 14.85558769 |
| UIJ64728.1 | stage_V_sporulation_protein_SpoVS_[Bacillus_cereus]                                 | CPTF_Cd         | 4081393.667 | 450277.4638 | 11.03244383 |
| UIJ64728.1 | stage_V_sporulation_protein_SpoVS_[Bacillus_cereus]                                 | CPTF_Co         | 3415782     | 282656.1134 | 8.275004476 |
| UIJ64728.1 | stage_V_sporulation_protein_SpoVS_[Bacillus_cereus]                                 | CPTF_Cu         | 2772034.233 | 391577.3332 | 14.12599197 |
| UIJ64728.1 | stage_V_sporulation_protein_SpoVS_[Bacillus_cereus]                                 | CPTF_Fe         | 3458490.333 | 110390.7794 | 3.191877632 |
| UIJ64728.1 | stage_V_sporulation_protein_SpoVS_[Bacillus_cereus]                                 | CPTF_Mn         | 2989079.333 | 810698.4696 | 27.12201247 |
| UIJ64728.1 | stage_V_sporulation_protein_SpoVS_[Bacillus_cereus]                                 | CPTF_Ni         | 2082183.367 | 528315.6649 | 25.37315749 |
| UIJ64728.1 | stage_V_sporulation_protein_SpoVS_[Bacillus_cereus]                                 | CPTF_U          | 1798703.533 | 524727.4476 | 29.17253666 |
| UIJ64728.1 | stage_V_sporulation_protein_SpoVS_[Bacillus_cereus]                                 | CPTF_metals_mix | 2255307.567 | 52318.52053 | 2.319795371 |
| UIJ64728.1 | stage_V_sporulation_protein_SpoVS_[Bacillus_cereus]                                 | CPTF_zcontrol   | 2612351.933 | 215787.646  | 8.260282363 |
| UIJ64729.1 | TIGR00282_family_metallophosphoesterase_[Bacillus_cereus]                           | CPTF_AI         | 488543      | 239310.9492 | 48.98462349 |

|            |                                                            |                 |             |             |             |
|------------|------------------------------------------------------------|-----------------|-------------|-------------|-------------|
| UIJ64729.1 | TIGR00282_family_metallophosphoesterase_[Bacillus_cereus]  | CPTF_Cd         | 258476.9667 | 208356.6434 | 80.60936573 |
| UIJ64729.1 | TIGR00282_family_metallophosphoesterase_[Bacillus_cereus]  | CPTF_Co         | 353455.5667 | 228020.0123 | 64.51164836 |
| UIJ64729.1 | TIGR00282_family_metallophosphoesterase_[Bacillus_cereus]  | CPTF_Cu         | 335373.8333 | 239933.6457 | 71.54214844 |
| UIJ64729.1 | TIGR00282_family_metallophosphoesterase_[Bacillus_cereus]  | CPTF_Fe         | 402456.1333 | 26023.65561 | 6.466209222 |
| UIJ64729.1 | TIGR00282_family_metallophosphoesterase_[Bacillus_cereus]  | CPTF_Mn         | 544148.4    | 54367.2449  | 9.991253287 |
| UIJ64729.1 | TIGR00282_family_metallophosphoesterase_[Bacillus_cereus]  | CPTF_Ni         | 296033.3333 | 227341.8359 | 76.79602611 |
| UIJ64729.1 | TIGR00282_family_metallophosphoesterase_[Bacillus_cereus]  | CPTF_U          | 475250.7667 | 112912.441  | 23.75849739 |
| UIJ64729.1 | TIGR00282_family_metallophosphoesterase_[Bacillus_cereus]  | CPTF_metals_mix | 353306.9    | 175650.4614 | 49.71611406 |
| UIJ64729.1 | TIGR00282_family_metallophosphoesterase_[Bacillus_cereus]  | CPTF_zcontrol   | 577532.6667 | 227369.8073 | 39.36916825 |
| UIJ64730.1 | ribonuclease_Y_[Bacillus_cereus]                           | CPTF_AI         | 1243994     | 282608.0769 | 22.71780064 |
| UIJ64730.1 | ribonuclease_Y_[Bacillus_cereus]                           | CPTF_Cd         | 1172162.6   | 351119.9322 | 29.95488272 |
| UIJ64730.1 | ribonuclease_Y_[Bacillus_cereus]                           | CPTF_Co         | 1460615.567 | 160748.8027 | 11.0055518  |
| UIJ64730.1 | ribonuclease_Y_[Bacillus_cereus]                           | CPTF_Cu         | 1273865.533 | 414375.0283 | 32.52894575 |
| UIJ64730.1 | ribonuclease_Y_[Bacillus_cereus]                           | CPTF_Fe         | 1054593.333 | 240494.7788 | 22.804504   |
| UIJ64730.1 | ribonuclease_Y_[Bacillus_cereus]                           | CPTF_Mn         | 1234357.767 | 218619.9339 | 17.71122925 |
| UIJ64730.1 | ribonuclease_Y_[Bacillus_cereus]                           | CPTF_Ni         | 1011060.067 | 255898.9046 | 25.3099606  |
| UIJ64730.1 | ribonuclease_Y_[Bacillus_cereus]                           | CPTF_U          | 1020794.667 | 301924.6709 | 29.57741462 |
| UIJ64730.1 | ribonuclease_Y_[Bacillus_cereus]                           | CPTF_metals_mix | 1855680.833 | 219373.1956 | 11.8217094  |
| UIJ64730.1 | ribonuclease_Y_[Bacillus_cereus]                           | CPTF_zcontrol   | 1227129.933 | 219312.3073 | 17.87197112 |
| UIJ64731.1 | recombinase_RecA_[Bacillus_cereus]                         | CPTF_AI         | 2478987.367 | 140388.1999 | 5.663126881 |
| UIJ64731.1 | recombinase_RecA_[Bacillus_cereus]                         | CPTF_Cd         | 2515762.667 | 94121.78581 | 3.741282398 |
| UIJ64731.1 | recombinase_RecA_[Bacillus_cereus]                         | CPTF_Co         | 2484120.367 | 426161.3956 | 17.15542457 |
| UIJ64731.1 | recombinase_RecA_[Bacillus_cereus]                         | CPTF_Cu         | 2410754.633 | 112515.0453 | 4.667212653 |
| UIJ64731.1 | recombinase_RecA_[Bacillus_cereus]                         | CPTF_Fe         | 2519044.7   | 120275.8433 | 4.774660937 |
| UIJ64731.1 | recombinase_RecA_[Bacillus_cereus]                         | CPTF_Mn         | 2428024.6   | 287313.8235 | 11.83323363 |
| UIJ64731.1 | recombinase_RecA_[Bacillus_cereus]                         | CPTF_Ni         | 2132141.2   | 231910.5022 | 10.87688293 |
| UIJ64731.1 | recombinase_RecA_[Bacillus_cereus]                         | CPTF_U          | 2348814.867 | 318471.0475 | 13.55879733 |
| UIJ64731.1 | recombinase_RecA_[Bacillus_cereus]                         | CPTF_metals_mix | 2733129.467 | 268768.0153 | 9.833709622 |
| UIJ64731.1 | recombinase_RecA_[Bacillus_cereus]                         | CPTF_zcontrol   | 2156543.217 | 189558.1727 | 8.789908369 |
| UIJ64732.1 | competence/damage-inducible_protein_CinA_[Bacillus_cereus] | CPTF_AI         | 474877.3667 | 114189.2309 | 24.04604619 |
| UIJ64732.1 | competence/damage-inducible_protein_CinA_[Bacillus_cereus] | CPTF_Cd         | 425017.3333 | 158896.6789 | 37.38592909 |
| UIJ64732.1 | competence/damage-inducible_protein_CinA_[Bacillus_cereus] | CPTF_Co         | 734118.6    | 69046.94662 | 9.405421224 |
| UIJ64732.1 | competence/damage-inducible_protein_CinA_[Bacillus_cereus] | CPTF_Cu         | 427887.7667 | 269927.8623 | 63.08379985 |
| UIJ64732.1 | competence/damage-inducible_protein_CinA_[Bacillus_cereus] | CPTF_Fe         | 579361.5    | 262719.0012 | 45.34629954 |
| UIJ64732.1 | competence/damage-inducible_protein_CinA_[Bacillus_cereus] | CPTF_Mn         | 452028.1333 | 55248.21282 | 12.2222952  |
| UIJ64732.1 | competence/damage-inducible_protein_CinA_[Bacillus_cereus] | CPTF_Ni         | 529470.5667 | 276375.6519 | 52.1984921  |
| UIJ64732.1 | competence/damage-inducible_protein_CinA_[Bacillus_cereus] | CPTF_U          | 282957.7    | 82523.61166 | 29.16464605 |
| UIJ64732.1 | competence/damage-inducible_protein_CinA_[Bacillus_cereus] | CPTF_metals_mix | 830420.0667 | 150177.709  | 18.08454721 |
| UIJ64732.1 | competence/damage-inducible_protein_CinA_[Bacillus_cereus] | CPTF_zcontrol   | 236837.0667 | 165872.4839 | 70.03653872 |
| UIJ64734.1 | DUF4115_domain-containing_protein_[Bacillus_cereus]        | CPTF_AI         | 160364.0667 | 28367.82179 | 17.68963733 |
| UIJ64734.1 | DUF4115_domain-containing_protein_[Bacillus_cereus]        | CPTF_Cd         | 172521.2    | 66598.28385 | 38.60295653 |
| UIJ64734.1 | DUF4115_domain-containing_protein_[Bacillus_cereus]        | CPTF_Co         | 141361.8667 | 66605.74545 | 47.11719434 |
| UIJ64734.1 | DUF4115_domain-containing_protein_[Bacillus_cereus]        | CPTF_Cu         | 170679.1333 | 20044.28491 | 11.74384034 |
| UIJ64734.1 | DUF4115_domain-containing_protein_[Bacillus_cereus]        | CPTF_Fe         | 159851.9667 | 73496.00773 | 45.97754364 |
| UIJ64734.1 | DUF4115_domain-containing_protein_[Bacillus_cereus]        | CPTF_Mn         | 100833.7667 | 98020.56332 | 97.21005825 |
| UIJ64734.1 | DUF4115_domain-containing_protein_[Bacillus_cereus]        | CPTF_Ni         | 143693.8333 | 50863.88528 | 35.39740301 |
| UIJ64734.1 | DUF4115_domain-containing_protein_[Bacillus_cereus]        | CPTF_U          | 51383.1     | 57941.06642 | 112.7628859 |
| UIJ64734.1 | DUF4115_domain-containing_protein_[Bacillus_cereus]        | CPTF_metals_mix | 162322.3667 | 21415.12594 | 13.19296063 |
| UIJ64734.1 | DUF4115_domain-containing_protein_[Bacillus_cereus]        | CPTF_zcontrol   | 140583.9    | 28641.06313 | 20.37293255 |
| UIJ64735.1 | DUF3388_domain-containing_protein_[Bacillus_cereus]        | CPTF_AI         | 0           | 0           | 0           |
| UIJ64735.1 | DUF3388_domain-containing_protein_[Bacillus_cereus]        | CPTF_Cd         | 0           | 0           | 0           |
| UIJ64735.1 | DUF3388_domain-containing_protein_[Bacillus_cereus]        | CPTF_Co         | 0           | 0           | 0           |
| UIJ64735.1 | DUF3388_domain-containing_protein_[Bacillus_cereus]        | CPTF_Cu         | 0           | 0           | 0           |
| UIJ64735.1 | DUF3388_domain-containing_protein_[Bacillus_cereus]        | CPTF_Fe         | 0           | 0           | 0           |
| UIJ64735.1 | DUF3388_domain-containing_protein_[Bacillus_cereus]        | CPTF_Mn         | 0           | 0           | 0           |
| UIJ64735.1 | DUF3388_domain-containing_protein_[Bacillus_cereus]        | CPTF_Ni         | 0           | 0           | 0           |
| UIJ64735.1 | DUF3388_domain-containing_protein_[Bacillus_cereus]        | CPTF_U          | 17706.23333 | 30668.09574 | 173.2050808 |
| UIJ64735.1 | DUF3388_domain-containing_protein_[Bacillus_cereus]        | CPTF_metals_mix | 0           | 0           | 0           |
| UIJ64735.1 | DUF3388_domain-containing_protein_[Bacillus_cereus]        | CPTF_zcontrol   | 0           | 0           | 0           |
| UIJ64738.1 | insulinase_family_protein_[Bacillus_cereus]                | CPTF_AI         | 0           | 0           | 0           |
| UIJ64738.1 | insulinase_family_protein_[Bacillus_cereus]                | CPTF_Cd         | 64473.9     | 17645.24589 | 27.36804488 |

|            |                                                                        |                 |             |             |             |
|------------|------------------------------------------------------------------------|-----------------|-------------|-------------|-------------|
| UIJ64738.1 | insulinase_family_protein_[Bacillus_cereus]                            | CPTF_Co         | 16866.6     | 29213.80815 | 173.2050808 |
| UIJ64738.1 | insulinase_family_protein_[Bacillus_cereus]                            | CPTF_Cu         | 22268.6     | 38570.34661 | 173.2050808 |
| UIJ64738.1 | insulinase_family_protein_[Bacillus_cereus]                            | CPTF_Fe         | 23307.3     | 40369.42779 | 173.2050808 |
| UIJ64738.1 | insulinase_family_protein_[Bacillus_cereus]                            | CPTF_Mn         | 20532.2     | 35562.81359 | 173.2050808 |
| UIJ64738.1 | insulinase_family_protein_[Bacillus_cereus]                            | CPTF_Ni         | 0           | 0           | 0           |
| UIJ64738.1 | insulinase_family_protein_[Bacillus_cereus]                            | CPTF_U          | 0           | 0           | 0           |
| UIJ64738.1 | insulinase_family_protein_[Bacillus_cereus]                            | CPTF_metals_mix | 116756.8    | 39926.48816 | 34.19628506 |
| UIJ64738.1 | insulinase_family_protein_[Bacillus_cereus]                            | CPTF_zcontrol   | 0           | 0           | 0           |
| UIJ64739.1 | insulinase_family_protein_[Bacillus_cereus]                            | CPTF_Al         | 104797.3333 | 119123.9959 | 113.6708274 |
| UIJ64739.1 | insulinase_family_protein_[Bacillus_cereus]                            | CPTF_Cd         | 166077.3333 | 37065.27804 | 22.31808357 |
| UIJ64739.1 | insulinase_family_protein_[Bacillus_cereus]                            | CPTF_Co         | 79420       | 70079.8002  | 88.23948653 |
| UIJ64739.1 | insulinase_family_protein_[Bacillus_cereus]                            | CPTF_Cu         | 258541      | 61084.00268 | 23.62642779 |
| UIJ64739.1 | insulinase_family_protein_[Bacillus_cereus]                            | CPTF_Fe         | 121350.6667 | 107416.7117 | 88.51761153 |
| UIJ64739.1 | insulinase_family_protein_[Bacillus_cereus]                            | CPTF_Mn         | 115231      | 115908.3355 | 100.5878067 |
| UIJ64739.1 | insulinase_family_protein_[Bacillus_cereus]                            | CPTF_Ni         | 29473.23333 | 51049.1376  | 173.2050808 |
| UIJ64739.1 | insulinase_family_protein_[Bacillus_cereus]                            | CPTF_U          | 82244       | 78942.47536 | 95.98569544 |
| UIJ64739.1 | insulinase_family_protein_[Bacillus_cereus]                            | CPTF_metals_mix | 778431.3    | 151720.4437 | 19.4905374  |
| UIJ64739.1 | insulinase_family_protein_[Bacillus_cereus]                            | CPTF_zcontrol   | 126791.3333 | 26009.17723 | 20.5133715  |
| UIJ64740.1 | ABC_transporter_permease_[Bacillus_cereus]                             | CPTF_Al         | 109473.6667 | 94812.50088 | 86.60758679 |
| UIJ64740.1 | ABC_transporter_permease_[Bacillus_cereus]                             | CPTF_Cd         | 55991       | 96979.25677 | 173.2050808 |
| UIJ64740.1 | ABC_transporter_permease_[Bacillus_cereus]                             | CPTF_Co         | 58755.33333 | 51798.01271 | 88.15882707 |
| UIJ64740.1 | ABC_transporter_permease_[Bacillus_cereus]                             | CPTF_Cu         | 85783.86667 | 94436.44454 | 110.0864862 |
| UIJ64740.1 | ABC_transporter_permease_[Bacillus_cereus]                             | CPTF_Fe         | 120947.8333 | 54403.91722 | 44.98130783 |
| UIJ64740.1 | ABC_transporter_permease_[Bacillus_cereus]                             | CPTF_Mn         | 0           | 0           | 0           |
| UIJ64740.1 | ABC_transporter_permease_[Bacillus_cereus]                             | CPTF_Ni         | 32717.63333 | 56668.60324 | 173.2050808 |
| UIJ64740.1 | ABC_transporter_permease_[Bacillus_cereus]                             | CPTF_U          | 0           | 0           | 0           |
| UIJ64740.1 | ABC_transporter_permease_[Bacillus_cereus]                             | CPTF_metals_mix | 286570.1    | 84552.51541 | 29.50500258 |
| UIJ64740.1 | ABC_transporter_permease_[Bacillus_cereus]                             | CPTF_zcontrol   | 0           | 0           | 0           |
| UIJ64742.1 | ABC_transporter_ATP-binding_protein_[Bacillus_cereus]                  | CPTF_Al         | 2476971.5   | 12654.24067 | 0.510875506 |
| UIJ64742.1 | ABC_transporter_ATP-binding_protein_[Bacillus_cereus]                  | CPTF_Cd         | 2041827.3   | 443656.3188 | 21.72839587 |
| UIJ64742.1 | ABC_transporter_ATP-binding_protein_[Bacillus_cereus]                  | CPTF_Co         | 2377713.033 | 213748.7648 | 8.989678815 |
| UIJ64742.1 | ABC_transporter_ATP-binding_protein_[Bacillus_cereus]                  | CPTF_Cu         | 1382610.567 | 20842.40606 | 1.507467581 |
| UIJ64742.1 | ABC_transporter_ATP-binding_protein_[Bacillus_cereus]                  | CPTF_Fe         | 2181099.467 | 728127.2594 | 33.38349628 |
| UIJ64742.1 | ABC_transporter_ATP-binding_protein_[Bacillus_cereus]                  | CPTF_Mn         | 2472354.1   | 179307.7658 | 7.252511516 |
| UIJ64742.1 | ABC_transporter_ATP-binding_protein_[Bacillus_cereus]                  | CPTF_Ni         | 1754699.333 | 538533.387  | 30.69092105 |
| UIJ64742.1 | ABC_transporter_ATP-binding_protein_[Bacillus_cereus]                  | CPTF_U          | 2187496.233 | 437767.1705 | 20.01224797 |
| UIJ64742.1 | ABC_transporter_ATP-binding_protein_[Bacillus_cereus]                  | CPTF_metals_mix | 1880504.067 | 201105.7161 | 10.69424521 |
| UIJ64742.1 | ABC_transporter_ATP-binding_protein_[Bacillus_cereus]                  | CPTF_zcontrol   | 2769467.733 | 251526.6865 | 9.082130962 |
| UIJ64743.1 | BMP_family_ABC_transporter_substrate-binding_protein_[Bacillus_cereus] | CPTF_Al         | 24907376.17 | 998137.2777 | 4.007396327 |
| UIJ64743.1 | BMP_family_ABC_transporter_substrate-binding_protein_[Bacillus_cereus] | CPTF_Cd         | 24232182.73 | 784817.5847 | 3.238740783 |
| UIJ64743.1 | BMP_family_ABC_transporter_substrate-binding_protein_[Bacillus_cereus] | CPTF_Co         | 24154036.87 | 901317.1237 | 3.731538246 |
| UIJ64743.1 | BMP_family_ABC_transporter_substrate-binding_protein_[Bacillus_cereus] | CPTF_Cu         | 20721274.7  | 271912.7706 | 1.312239592 |
| UIJ64743.1 | BMP_family_ABC_transporter_substrate-binding_protein_[Bacillus_cereus] | CPTF_Fe         | 23321289.4  | 1111848.54  | 4.76752602  |
| UIJ64743.1 | BMP_family_ABC_transporter_substrate-binding_protein_[Bacillus_cereus] | CPTF_Mn         | 24487990.1  | 1702841.829 | 6.953783557 |
| UIJ64743.1 | BMP_family_ABC_transporter_substrate-binding_protein_[Bacillus_cereus] | CPTF_Ni         | 22154201.93 | 1371416.598 | 6.190322732 |
| UIJ64743.1 | BMP_family_ABC_transporter_substrate-binding_protein_[Bacillus_cereus] | CPTF_U          | 20111793.33 | 2476531.23  | 12.31382597 |
| UIJ64743.1 | BMP_family_ABC_transporter_substrate-binding_protein_[Bacillus_cereus] | CPTF_metals_mix | 21831958.13 | 722710.8124 | 3.310334364 |
| UIJ64743.1 | BMP_family_ABC_transporter_substrate-binding_protein_[Bacillus_cereus] | CPTF_zcontrol   | 23921152    | 425374.9078 | 1.778237552 |
| UIJ64744.1 | GntR_family_transcriptional_regulator_[Bacillus_cereus]                | CPTF_Al         | 2124076.167 | 159081.8345 | 7.489459984 |
| UIJ64744.1 | GntR_family_transcriptional_regulator_[Bacillus_cereus]                | CPTF_Cd         | 1838380.6   | 236145.9726 | 12.84532553 |
| UIJ64744.1 | GntR_family_transcriptional_regulator_[Bacillus_cereus]                | CPTF_Co         | 1935513.667 | 156548.4011 | 8.088209544 |
| UIJ64744.1 | GntR_family_transcriptional_regulator_[Bacillus_cereus]                | CPTF_Cu         | 1688941.867 | 35668.87862 | 2.111906829 |
| UIJ64744.1 | GntR_family_transcriptional_regulator_[Bacillus_cereus]                | CPTF_Fe         | 1990934.967 | 72321.60324 | 3.632544732 |
| UIJ64744.1 | GntR_family_transcriptional_regulator_[Bacillus_cereus]                | CPTF_Mn         | 1942736.333 | 291105.2855 | 14.98429203 |
| UIJ64744.1 | GntR_family_transcriptional_regulator_[Bacillus_cereus]                | CPTF_Ni         | 1888848.167 | 273932.7602 | 14.50263526 |
| UIJ64744.1 | GntR_family_transcriptional_regulator_[Bacillus_cereus]                | CPTF_U          | 1925368.133 | 426610.1223 | 22.15732747 |
| UIJ64744.1 | GntR_family_transcriptional_regulator_[Bacillus_cereus]                | CPTF_metals_mix | 1688815.633 | 193622.1996 | 11.46496964 |
| UIJ64744.1 | GntR_family_transcriptional_regulator_[Bacillus_cereus]                | CPTF_zcontrol   | 2227803.267 | 74530.15988 | 3.345455184 |
| UIJ64748.1 | ribonuclease_J_[Bacillus_cereus]                                       | CPTF_Al         | 742152      | 77511.34964 | 10.44413404 |
| UIJ64748.1 | ribonuclease_J_[Bacillus_cereus]                                       | CPTF_Cd         | 754866.7    | 148781.8427 | 19.70968419 |
| UIJ64748.1 | ribonuclease_J_[Bacillus_cereus]                                       | CPTF_Co         | 949265.6667 | 53558.98031 | 5.642148683 |

|            |                                                             |                 |             |             |             |
|------------|-------------------------------------------------------------|-----------------|-------------|-------------|-------------|
| UIJ64748.1 | ribonuclease_J [Bacillus_cereus]                            | CPTF_Cu         | 787665.7333 | 124773.5474 | 15.84092618 |
| UIJ64748.1 | ribonuclease_J [Bacillus_cereus]                            | CPTF_Fe         | 704494.3333 | 21181.86548 | 3.006676488 |
| UIJ64748.1 | ribonuclease_J [Bacillus_cereus]                            | CPTF_Mn         | 670838.4    | 236823.6234 | 35.30263375 |
| UIJ64748.1 | ribonuclease_J [Bacillus_cereus]                            | CPTF_Ni         | 638614      | 5208.544998 | 0.815601443 |
| UIJ64748.1 | ribonuclease_J [Bacillus_cereus]                            | CPTF_U          | 596295.3333 | 178730.949  | 29.97356158 |
| UIJ64748.1 | ribonuclease_J [Bacillus_cereus]                            | CPTF_metals_mix | 1274150.9   | 132334.3307 | 10.38607991 |
| UIJ64748.1 | ribonuclease_J [Bacillus_cereus]                            | CPTF_zcontrol   | 664866      | 119834.6086 | 18.02387377 |
| UIJ64749.1 | 4-hydroxy-tetrahydrodipicolinate_synthase [Bacillus_cereus] | CPTF_Al         | 3908374.667 | 32952.31061 | 0.843120566 |
| UIJ64749.1 | 4-hydroxy-tetrahydrodipicolinate_synthase [Bacillus_cereus] | CPTF_Cd         | 3644310.667 | 325039.2411 | 8.919087061 |
| UIJ64749.1 | 4-hydroxy-tetrahydrodipicolinate_synthase [Bacillus_cereus] | CPTF_Co         | 4184430.033 | 144229.4567 | 3.446812483 |
| UIJ64749.1 | 4-hydroxy-tetrahydrodipicolinate_synthase [Bacillus_cereus] | CPTF_Cu         | 4907276.633 | 251294.7094 | 5.120858843 |
| UIJ64749.1 | 4-hydroxy-tetrahydrodipicolinate_synthase [Bacillus_cereus] | CPTF_Fe         | 3380518.1   | 418995.4897 | 12.3944164  |
| UIJ64749.1 | 4-hydroxy-tetrahydrodipicolinate_synthase [Bacillus_cereus] | CPTF_Mn         | 3666854     | 902131.5169 | 24.60232987 |
| UIJ64749.1 | 4-hydroxy-tetrahydrodipicolinate_synthase [Bacillus_cereus] | CPTF_Ni         | 3833327.233 | 291698.3177 | 7.60953344  |
| UIJ64749.1 | 4-hydroxy-tetrahydrodipicolinate_synthase [Bacillus_cereus] | CPTF_U          | 2634687.667 | 391254.6981 | 14.85013587 |
| UIJ64749.1 | 4-hydroxy-tetrahydrodipicolinate_synthase [Bacillus_cereus] | CPTF_metals_mix | 6472858.8   | 250087.4179 | 3.863631598 |
| UIJ64749.1 | 4-hydroxy-tetrahydrodipicolinate_synthase [Bacillus_cereus] | CPTF_zcontrol   | 3562197.333 | 164111.7527 | 4.6070371   |
| UIJ64750.1 | aspartate_kinase [Bacillus_cereus]                          | CPTF_Al         | 140301.3333 | 16574.92095 | 11.81380145 |
| UIJ64750.1 | aspartate_kinase [Bacillus_cereus]                          | CPTF_Cd         | 108921.1    | 32107.86723 | 29.47809674 |
| UIJ64750.1 | aspartate_kinase [Bacillus_cereus]                          | CPTF_Co         | 151206.3333 | 15464.34655 | 10.22731404 |
| UIJ64750.1 | aspartate_kinase [Bacillus_cereus]                          | CPTF_Cu         | 167954.3333 | 9183.056372 | 5.467591214 |
| UIJ64750.1 | aspartate_kinase [Bacillus_cereus]                          | CPTF_Fe         | 118975.6667 | 14111.43367 | 11.86077294 |
| UIJ64750.1 | aspartate_kinase [Bacillus_cereus]                          | CPTF_Mn         | 144088.1333 | 31933.2698  | 22.16231764 |
| UIJ64750.1 | aspartate_kinase [Bacillus_cereus]                          | CPTF_Ni         | 186811.4    | 22924.47107 | 12.27145188 |
| UIJ64750.1 | aspartate_kinase [Bacillus_cereus]                          | CPTF_U          | 96521.66667 | 83620.47807 | 86.63389367 |
| UIJ64750.1 | aspartate_kinase [Bacillus_cereus]                          | CPTF_metals_mix | 517212.2333 | 331336.8824 | 64.06207377 |
| UIJ64750.1 | aspartate_kinase [Bacillus_cereus]                          | CPTF_zcontrol   | 134270.8333 | 65366.94129 | 48.68290429 |
| UIJ64751.1 | aspartate-semialdehyde_dehydrogenase [Bacillus_cereus]      | CPTF_Al         | 10132207.83 | 513547.4388 | 5.068465307 |
| UIJ64751.1 | aspartate-semialdehyde_dehydrogenase [Bacillus_cereus]      | CPTF_Cd         | 9602751     | 681427.5002 | 7.096169631 |
| UIJ64751.1 | aspartate-semialdehyde_dehydrogenase [Bacillus_cereus]      | CPTF_Co         | 10303161.07 | 250432.6872 | 2.43063935  |
| UIJ64751.1 | aspartate-semialdehyde_dehydrogenase [Bacillus_cereus]      | CPTF_Cu         | 10805509.23 | 953175.9881 | 8.821203772 |
| UIJ64751.1 | aspartate-semialdehyde_dehydrogenase [Bacillus_cereus]      | CPTF_Fe         | 9481475.4   | 699257.762  | 7.374988939 |
| UIJ64751.1 | aspartate-semialdehyde_dehydrogenase [Bacillus_cereus]      | CPTF_Mn         | 9319967.633 | 1128865.795 | 12.11233601 |
| UIJ64751.1 | aspartate-semialdehyde_dehydrogenase [Bacillus_cereus]      | CPTF_Ni         | 9394970.2   | 1033730.528 | 11.00302083 |
| UIJ64751.1 | aspartate-semialdehyde_dehydrogenase [Bacillus_cereus]      | CPTF_U          | 8134977.2   | 926111.979  | 11.38432175 |
| UIJ64751.1 | aspartate-semialdehyde_dehydrogenase [Bacillus_cereus]      | CPTF_metals_mix | 12745299.33 | 165592.5372 | 1.299244003 |
| UIJ64751.1 | aspartate-semialdehyde_dehydrogenase [Bacillus_cereus]      | CPTF_zcontrol   | 9351700.8   | 389231.7598 | 4.162149411 |
| UIJ64755.1 | insulinase_family_protein [Bacillus_cereus]                 | CPTF_Al         | 289798.6667 | 150413.4555 | 51.90274241 |
| UIJ64755.1 | insulinase_family_protein [Bacillus_cereus]                 | CPTF_Cd         | 378498.5    | 20959.7344  | 5.537600386 |
| UIJ64755.1 | insulinase_family_protein [Bacillus_cereus]                 | CPTF_Co         | 405816.4333 | 105225.5045 | 25.9293549  |
| UIJ64755.1 | insulinase_family_protein [Bacillus_cereus]                 | CPTF_Cu         | 502060.3    | 144885.7718 | 28.85824109 |
| UIJ64755.1 | insulinase_family_protein [Bacillus_cereus]                 | CPTF_Fe         | 440684.6667 | 39660.49022 | 8.99974363  |
| UIJ64755.1 | insulinase_family_protein [Bacillus_cereus]                 | CPTF_Mn         | 308259.2    | 73665.46684 | 23.89724843 |
| UIJ64755.1 | insulinase_family_protein [Bacillus_cereus]                 | CPTF_Ni         | 200293.8667 | 77997.64896 | 38.94160628 |
| UIJ64755.1 | insulinase_family_protein [Bacillus_cereus]                 | CPTF_U          | 190033.9333 | 79932.74175 | 42.06235189 |
| UIJ64755.1 | insulinase_family_protein [Bacillus_cereus]                 | CPTF_metals_mix | 776127.5    | 66371.18202 | 8.551582313 |
| UIJ64755.1 | insulinase_family_protein [Bacillus_cereus]                 | CPTF_zcontrol   | 267118.7667 | 51908.43899 | 19.43271887 |
| UIJ64757.1 | polyribonucleotide_nucleotidyltransferase [Bacillus_cereus] | CPTF_Al         | 6115733.1   | 444527.6717 | 7.268591753 |
| UIJ64757.1 | polyribonucleotide_nucleotidyltransferase [Bacillus_cereus] | CPTF_Cd         | 5756523     | 718280.0847 | 12.47767245 |
| UIJ64757.1 | polyribonucleotide_nucleotidyltransferase [Bacillus_cereus] | CPTF_Co         | 6810878.267 | 438464.8937 | 6.43771444  |
| UIJ64757.1 | polyribonucleotide_nucleotidyltransferase [Bacillus_cereus] | CPTF_Cu         | 6000840.1   | 761439.3614 | 12.68887937 |
| UIJ64757.1 | polyribonucleotide_nucleotidyltransferase [Bacillus_cereus] | CPTF_Fe         | 6137957.067 | 139971.8759 | 2.280431003 |
| UIJ64757.1 | polyribonucleotide_nucleotidyltransferase [Bacillus_cereus] | CPTF_Mn         | 5710970.6   | 763160.5729 | 13.36306254 |
| UIJ64757.1 | polyribonucleotide_nucleotidyltransferase [Bacillus_cereus] | CPTF_Ni         | 5622925     | 990762.9176 | 17.62006282 |
| UIJ64757.1 | polyribonucleotide_nucleotidyltransferase [Bacillus_cereus] | CPTF_U          | 4652272.567 | 533861.5936 | 11.47528624 |
| UIJ64757.1 | polyribonucleotide_nucleotidyltransferase [Bacillus_cereus] | CPTF_metals_mix | 5550606.7   | 188163.2821 | 3.389958834 |
| UIJ64757.1 | polyribonucleotide_nucleotidyltransferase [Bacillus_cereus] | CPTF_zcontrol   | 5602904.467 | 370843.4394 | 6.618771418 |
| UIJ64758.1 | 30S_ribosomal_protein_S15 [Bacillus_cereus]                 | CPTF_Al         | 6870144.633 | 858439.0958 | 12.49521141 |
| UIJ64758.1 | 30S_ribosomal_protein_S15 [Bacillus_cereus]                 | CPTF_Cd         | 7545554.867 | 455182.2305 | 6.03245538  |
| UIJ64758.1 | 30S_ribosomal_protein_S15 [Bacillus_cereus]                 | CPTF_Co         | 7832340.867 | 243312.9637 | 3.10651653  |
| UIJ64758.1 | 30S_ribosomal_protein_S15 [Bacillus_cereus]                 | CPTF_Cu         | 6589557.233 | 507205.621  | 7.69711231  |

|            |                                                                 |                 |             |             |             |
|------------|-----------------------------------------------------------------|-----------------|-------------|-------------|-------------|
| UIJ64758.1 | 30S_ribosomal_protein_S15_[Bacillus_cereus]                     | CPTF_Fe         | 7277651     | 881312.8966 | 12.10985381 |
| UIJ64758.1 | 30S_ribosomal_protein_S15_[Bacillus_cereus]                     | CPTF_Mn         | 7655760.333 | 1655184.203 | 21.6201152  |
| UIJ64758.1 | 30S_ribosomal_protein_S15_[Bacillus_cereus]                     | CPTF_Ni         | 5661642.333 | 538739.1428 | 9.51559832  |
| UIJ64758.1 | 30S_ribosomal_protein_S15_[Bacillus_cereus]                     | CPTF_U          | 4518644.233 | 2467695.835 | 54.61142121 |
| UIJ64758.1 | 30S_ribosomal_protein_S15_[Bacillus_cereus]                     | CPTF_metals_mix | 5963192.667 | 341767.9993 | 5.731292252 |
| UIJ64758.1 | 30S_ribosomal_protein_S15_[Bacillus_cereus]                     | CPTF_zcontrol   | 6708049     | 313503.3958 | 4.673540635 |
| UIJ64759.1 | bifunctional_riboflavin_kinase/FAD_synthetase_[Bacillus_cereus] | CPTF_Al         | 0           | 0           | 0           |
| UIJ64759.1 | bifunctional_riboflavin_kinase/FAD_synthetase_[Bacillus_cereus] | CPTF_Cd         | 18695.43333 | 32381.4404  | 173.2050808 |
| UIJ64759.1 | bifunctional_riboflavin_kinase/FAD_synthetase_[Bacillus_cereus] | CPTF_Co         | 0           | 0           | 0           |
| UIJ64759.1 | bifunctional_riboflavin_kinase/FAD_synthetase_[Bacillus_cereus] | CPTF_Cu         | 0           | 0           | 0           |
| UIJ64759.1 | bifunctional_riboflavin_kinase/FAD_synthetase_[Bacillus_cereus] | CPTF_Fe         | 0           | 0           | 0           |
| UIJ64759.1 | bifunctional_riboflavin_kinase/FAD_synthetase_[Bacillus_cereus] | CPTF_Mn         | 12956.3     | 22440.96988 | 173.2050808 |
| UIJ64759.1 | bifunctional_riboflavin_kinase/FAD_synthetase_[Bacillus_cereus] | CPTF_Ni         | 0           | 0           | 0           |
| UIJ64759.1 | bifunctional_riboflavin_kinase/FAD_synthetase_[Bacillus_cereus] | CPTF_U          | 0           | 0           | 0           |
| UIJ64759.1 | bifunctional_riboflavin_kinase/FAD_synthetase_[Bacillus_cereus] | CPTF_metals_mix | 74575.03333 | 23376.42846 | 31.34618574 |
| UIJ64759.1 | bifunctional_riboflavin_kinase/FAD_synthetase_[Bacillus_cereus] | CPTF_zcontrol   | 0           | 0           | 0           |
| UIJ64761.1 | 30S_ribosome-binding_factor_RbfA_[Bacillus_cereus]              | CPTF_Al         | 8857.5      | 15341.64003 | 173.2050808 |
| UIJ64761.1 | 30S_ribosome-binding_factor_RbfA_[Bacillus_cereus]              | CPTF_Cd         | 45378.6     | 19645.20467 | 43.29178219 |
| UIJ64761.1 | 30S_ribosome-binding_factor_RbfA_[Bacillus_cereus]              | CPTF_Co         | 396973.9333 | 653634.7492 | 164.6543247 |
| UIJ64761.1 | 30S_ribosome-binding_factor_RbfA_[Bacillus_cereus]              | CPTF_Cu         | 670110.6667 | 598784.8289 | 89.35611067 |
| UIJ64761.1 | 30S_ribosome-binding_factor_RbfA_[Bacillus_cereus]              | CPTF_Fe         | 23807.43333 | 23552.28696 | 98.92829113 |
| UIJ64761.1 | 30S_ribosome-binding_factor_RbfA_[Bacillus_cereus]              | CPTF_Mn         | 506719.2667 | 851679.5898 | 168.0772068 |
| UIJ64761.1 | 30S_ribosome-binding_factor_RbfA_[Bacillus_cereus]              | CPTF_Ni         | 513195      | 559703.4698 | 109.0625337 |
| UIJ64761.1 | 30S_ribosome-binding_factor_RbfA_[Bacillus_cereus]              | CPTF_U          | 869235.3333 | 606570.9441 | 69.78213158 |
| UIJ64761.1 | 30S_ribosome-binding_factor_RbfA_[Bacillus_cereus]              | CPTF_metals_mix | 239462.1667 | 78458.30827 | 32.76438586 |
| UIJ64761.1 | 30S_ribosome-binding_factor_RbfA_[Bacillus_cereus]              | CPTF_zcontrol   | 399339.3333 | 544827.8163 | 136.4322948 |
| UIJ64763.1 | translation_initiation_factor_IF-2_[Bacillus_cereus]            | CPTF_Al         | 6018703.3   | 865852.6431 | 14.386033   |
| UIJ64763.1 | translation_initiation_factor_IF-2_[Bacillus_cereus]            | CPTF_Cd         | 7294290.2   | 264930.913  | 3.632031434 |
| UIJ64763.1 | translation_initiation_factor_IF-2_[Bacillus_cereus]            | CPTF_Co         | 5792196.8   | 521323.0555 | 9.000437545 |
| UIJ64763.1 | translation_initiation_factor_IF-2_[Bacillus_cereus]            | CPTF_Cu         | 4918057.1   | 24250.55272 | 0.493092134 |
| UIJ64763.1 | translation_initiation_factor_IF-2_[Bacillus_cereus]            | CPTF_Fe         | 6106343.033 | 1519128.709 | 24.87788028 |
| UIJ64763.1 | translation_initiation_factor_IF-2_[Bacillus_cereus]            | CPTF_Mn         | 6943817.4   | 2925183.327 | 42.12644369 |
| UIJ64763.1 | translation_initiation_factor_IF-2_[Bacillus_cereus]            | CPTF_Ni         | 3463053.567 | 755725.1084 | 21.82250704 |
| UIJ64763.1 | translation_initiation_factor_IF-2_[Bacillus_cereus]            | CPTF_U          | 3780558.667 | 1182652.306 | 31.28247463 |
| UIJ64763.1 | translation_initiation_factor_IF-2_[Bacillus_cereus]            | CPTF_metals_mix | 13507608.8  | 1198386.371 | 8.871935726 |
| UIJ64763.1 | translation_initiation_factor_IF-2_[Bacillus_cereus]            | CPTF_zcontrol   | 5628891.467 | 648519.6509 | 11.52126764 |
| UIJ64765.1 | YlxR_family_protein_[Bacillus_cereus]                           | CPTF_Al         | 101913.0667 | 146468.6672 | 143.7192227 |
| UIJ64765.1 | YlxR_family_protein_[Bacillus_cereus]                           | CPTF_Cd         | 0           | 0           | 0           |
| UIJ64765.1 | YlxR_family_protein_[Bacillus_cereus]                           | CPTF_Co         | 77374       | 134015.6992 | 173.2050808 |
| UIJ64765.1 | YlxR_family_protein_[Bacillus_cereus]                           | CPTF_Cu         | 45217.66667 | 78319.29607 | 173.2050808 |
| UIJ64765.1 | YlxR_family_protein_[Bacillus_cereus]                           | CPTF_Fe         | 58424.66667 | 101194.4911 | 173.2050808 |
| UIJ64765.1 | YlxR_family_protein_[Bacillus_cereus]                           | CPTF_Mn         | 181060.3333 | 162800.078  | 89.91482289 |
| UIJ64765.1 | YlxR_family_protein_[Bacillus_cereus]                           | CPTF_Ni         | 115482      | 111841.2864 | 96.84737568 |
| UIJ64765.1 | YlxR_family_protein_[Bacillus_cereus]                           | CPTF_U          | 193162.6667 | 168829.5835 | 87.40280224 |
| UIJ64765.1 | YlxR_family_protein_[Bacillus_cereus]                           | CPTF_metals_mix | 12332.2     | 21359.99697 | 173.2050808 |
| UIJ64765.1 | YlxR_family_protein_[Bacillus_cereus]                           | CPTF_zcontrol   | 0           | 0           | 0           |
| UIJ64766.1 | transcription_termination_factor_NusA_[Bacillus_cereus]         | CPTF_Al         | 897097.2333 | 421209.8593 | 46.9525313  |
| UIJ64766.1 | transcription_termination_factor_NusA_[Bacillus_cereus]         | CPTF_Cd         | 969186.8667 | 476188.8052 | 49.13281655 |
| UIJ64766.1 | transcription_termination_factor_NusA_[Bacillus_cereus]         | CPTF_Co         | 2200699.967 | 1787589.823 | 81.22823872 |
| UIJ64766.1 | transcription_termination_factor_NusA_[Bacillus_cereus]         | CPTF_Cu         | 1749959.767 | 863432.753  | 49.34014881 |
| UIJ64766.1 | transcription_termination_factor_NusA_[Bacillus_cereus]         | CPTF_Fe         | 1163953.467 | 771056.392  | 66.24460634 |
| UIJ64766.1 | transcription_termination_factor_NusA_[Bacillus_cereus]         | CPTF_Mn         | 2321275.533 | 1502675.045 | 64.73488492 |
| UIJ64766.1 | transcription_termination_factor_NusA_[Bacillus_cereus]         | CPTF_Ni         | 2314462.833 | 2895385.137 | 125.0996601 |
| UIJ64766.1 | transcription_termination_factor_NusA_[Bacillus_cereus]         | CPTF_U          | 2920896.833 | 2131459.583 | 72.97277874 |
| UIJ64766.1 | transcription_termination_factor_NusA_[Bacillus_cereus]         | CPTF_metals_mix | 1562712.387 | 109585.4945 | 7.012518456 |
| UIJ64766.1 | transcription_termination_factor_NusA_[Bacillus_cereus]         | CPTF_zcontrol   | 1081042.167 | 879514.1425 | 81.35798673 |
| UIJ64767.1 | ribosome_maturation_factor_RimP_[Bacillus_cereus]               | CPTF_Al         | 178558.1333 | 276161.8295 | 154.6621397 |
| UIJ64767.1 | ribosome_maturation_factor_RimP_[Bacillus_cereus]               | CPTF_Cd         | 293890.0667 | 257854.6507 | 87.73847094 |
| UIJ64767.1 | ribosome_maturation_factor_RimP_[Bacillus_cereus]               | CPTF_Co         | 175217.9    | 257271.2948 | 146.8293449 |
| UIJ64767.1 | ribosome_maturation_factor_RimP_[Bacillus_cereus]               | CPTF_Cu         | 254801.5333 | 207245.8484 | 81.33618572 |
| UIJ64767.1 | ribosome_maturation_factor_RimP_[Bacillus_cereus]               | CPTF_Fe         | 307060.3667 | 217941.9695 | 70.97691305 |



|            |                                                                            |                 |             |             |             |
|------------|----------------------------------------------------------------------------|-----------------|-------------|-------------|-------------|
| UIJ64767.1 | ribosome_maturaton_factor_RimP_[ <i>Bacillus_cereus</i> ]                  | CPTF_Mn         | 306163      | 265268.6469 | 86.64294735 |
| UIJ64767.1 | ribosome_maturaton_factor_RimP_[ <i>Bacillus_cereus</i> ]                  | CPTF_Ni         | 190987.7    | 274923.2867 | 143.9481635 |
| UIJ64767.1 | ribosome_maturaton_factor_RimP_[ <i>Bacillus_cereus</i> ]                  | CPTF_U          | 356897.3333 | 309125.1929 | 86.61459865 |
| UIJ64767.1 | ribosome_maturaton_factor_RimP_[ <i>Bacillus_cereus</i> ]                  | CPTF_metals_mix | 294717.2    | 27644.46213 | 9.37999619  |
| UIJ64767.1 | ribosome_maturaton_factor_RimP_[ <i>Bacillus_cereus</i> ]                  | CPTF_zcontrol   | 493346.3333 | 23062.75127 | 4.674758829 |
| UIJ64768.1 | PoIc-type_DNA_polymerase_III_[ <i>Bacillus_cereus</i> ]                    | CPTF_Al         | 98641.83333 | 58132.71226 | 58.93312228 |
| UIJ64768.1 | PoIc-type_DNA_polymerase_III_[ <i>Bacillus_cereus</i> ]                    | CPTF_Cd         | 129342.2633 | 95108.55143 | 73.53246261 |
| UIJ64768.1 | PoIc-type_DNA_polymerase_III_[ <i>Bacillus_cereus</i> ]                    | CPTF_Co         | 79156.14333 | 28164.90919 | 35.58145711 |
| UIJ64768.1 | PoIc-type_DNA_polymerase_III_[ <i>Bacillus_cereus</i> ]                    | CPTF_Cu         | 247607.6    | 168696.648  | 68.13064218 |
| UIJ64768.1 | PoIc-type_DNA_polymerase_III_[ <i>Bacillus_cereus</i> ]                    | CPTF_Fe         | 184695.8667 | 55216.83432 | 29.89608556 |
| UIJ64768.1 | PoIc-type_DNA_polymerase_III_[ <i>Bacillus_cereus</i> ]                    | CPTF_Mn         | 172618.3333 | 227442.0941 | 131.7601032 |
| UIJ64768.1 | PoIc-type_DNA_polymerase_III_[ <i>Bacillus_cereus</i> ]                    | CPTF_Ni         | 111631.0667 | 59622.6365  | 53.41043338 |
| UIJ64768.1 | PoIc-type_DNA_polymerase_III_[ <i>Bacillus_cereus</i> ]                    | CPTF_U          | 165083.3    | 149431.9671 | 90.5191301  |
| UIJ64768.1 | PoIc-type_DNA_polymerase_III_[ <i>Bacillus_cereus</i> ]                    | CPTF_metals_mix | 151409.7033 | 58511.23202 | 38.64430795 |
| UIJ64768.1 | PoIc-type_DNA_polymerase_III_[ <i>Bacillus_cereus</i> ]                    | CPTF_zcontrol   | 185719.6    | 197464.777  | 106.3241451 |
| UIJ64769.1 | proline--tRNA_ligase_[ <i>Bacillus_cereus</i> ]                            | CPTF_Al         | 480696.8333 | 35672.56834 | 7.421011719 |
| UIJ64769.1 | proline--tRNA_ligase_[ <i>Bacillus_cereus</i> ]                            | CPTF_Cd         | 716076.6667 | 527865.5351 | 73.71634346 |
| UIJ64769.1 | proline--tRNA_ligase_[ <i>Bacillus_cereus</i> ]                            | CPTF_Co         | 540412.6333 | 68359.26049 | 12.64945641 |
| UIJ64769.1 | proline--tRNA_ligase_[ <i>Bacillus_cereus</i> ]                            | CPTF_Cu         | 691467.6667 | 267044.1084 | 38.61989813 |
| UIJ64769.1 | proline--tRNA_ligase_[ <i>Bacillus_cereus</i> ]                            | CPTF_Fe         | 581362.4    | 351608.3533 | 60.4800643  |
| UIJ64769.1 | proline--tRNA_ligase_[ <i>Bacillus_cereus</i> ]                            | CPTF_Mn         | 1070798.633 | 685055.6161 | 63.97613845 |
| UIJ64769.1 | proline--tRNA_ligase_[ <i>Bacillus_cereus</i> ]                            | CPTF_Ni         | 495529.5667 | 59454.64959 | 11.99820426 |
| UIJ64769.1 | proline--tRNA_ligase_[ <i>Bacillus_cereus</i> ]                            | CPTF_U          | 346090.0667 | 337906.4449 | 97.63540693 |
| UIJ64769.1 | proline--tRNA_ligase_[ <i>Bacillus_cereus</i> ]                            | CPTF_metals_mix | 1041779.667 | 678240.3962 | 65.10401555 |
| UIJ64769.1 | proline--tRNA_ligase_[ <i>Bacillus_cereus</i> ]                            | CPTF_zcontrol   | 419564.9333 | 8899.412527 | 2.12110494  |
| UIJ64770.1 | RIP_metalloprotease_RseP_[ <i>Bacillus_cereus</i> ]                        | CPTF_Al         | 282131      | 92097.14185 | 32.64339681 |
| UIJ64770.1 | RIP_metalloprotease_RseP_[ <i>Bacillus_cereus</i> ]                        | CPTF_Cd         | 139486.9    | 90918.1955  | 65.18045458 |
| UIJ64770.1 | RIP_metalloprotease_RseP_[ <i>Bacillus_cereus</i> ]                        | CPTF_Co         | 365604.6667 | 97156.38518 | 26.57416444 |
| UIJ64770.1 | RIP_metalloprotease_RseP_[ <i>Bacillus_cereus</i> ]                        | CPTF_Cu         | 350230.6667 | 104462.2964 | 29.82671318 |
| UIJ64770.1 | RIP_metalloprotease_RseP_[ <i>Bacillus_cereus</i> ]                        | CPTF_Fe         | 226696.6667 | 21840.64775 | 9.634304763 |
| UIJ64770.1 | RIP_metalloprotease_RseP_[ <i>Bacillus_cereus</i> ]                        | CPTF_Mn         | 179650.2667 | 95774.45119 | 53.31161093 |
| UIJ64770.1 | RIP_metalloprotease_RseP_[ <i>Bacillus_cereus</i> ]                        | CPTF_Ni         | 315431      | 87843.77387 | 27.8488081  |
| UIJ64770.1 | RIP_metalloprotease_RseP_[ <i>Bacillus_cereus</i> ]                        | CPTF_U          | 248929.3333 | 62530.29324 | 25.11969658 |
| UIJ64770.1 | RIP_metalloprotease_RseP_[ <i>Bacillus_cereus</i> ]                        | CPTF_metals_mix | 316201      | 112618.2148 | 35.61602109 |
| UIJ64770.1 | RIP_metalloprotease_RseP_[ <i>Bacillus_cereus</i> ]                        | CPTF_zcontrol   | 325694.3333 | 130347.1698 | 40.02131953 |
| UIJ64771.1 | 1-deoxy-D-xylulose-5-phosphate_reductoisomerase_[ <i>Bacillus_cereus</i> ] | CPTF_Al         | 1116666.667 | 72341.78138 | 6.478368482 |
| UIJ64771.1 | 1-deoxy-D-xylulose-5-phosphate_reductoisomerase_[ <i>Bacillus_cereus</i> ] | CPTF_Cd         | 558282.3333 | 483493.1647 | 86.60370136 |
| UIJ64771.1 | 1-deoxy-D-xylulose-5-phosphate_reductoisomerase_[ <i>Bacillus_cereus</i> ] | CPTF_Co         | 634405.3333 | 556476.1818 | 87.71618909 |
| UIJ64771.1 | 1-deoxy-D-xylulose-5-phosphate_reductoisomerase_[ <i>Bacillus_cereus</i> ] | CPTF_Cu         | 961555      | 199035.6953 | 20.69935628 |
| UIJ64771.1 | 1-deoxy-D-xylulose-5-phosphate_reductoisomerase_[ <i>Bacillus_cereus</i> ] | CPTF_Fe         | 685501.3333 | 604087.4721 | 88.12345692 |
| UIJ64771.1 | 1-deoxy-D-xylulose-5-phosphate_reductoisomerase_[ <i>Bacillus_cereus</i> ] | CPTF_Mn         | 299709.3333 | 519111.7928 | 173.2050808 |
| UIJ64771.1 | 1-deoxy-D-xylulose-5-phosphate_reductoisomerase_[ <i>Bacillus_cereus</i> ] | CPTF_Ni         | 583964.6667 | 516023.6652 | 88.36556296 |
| UIJ64771.1 | 1-deoxy-D-xylulose-5-phosphate_reductoisomerase_[ <i>Bacillus_cereus</i> ] | CPTF_U          | 694502      | 621925.9474 | 89.54991452 |
| UIJ64771.1 | 1-deoxy-D-xylulose-5-phosphate_reductoisomerase_[ <i>Bacillus_cereus</i> ] | CPTF_metals_mix | 0           | 0           | 0           |
| UIJ64771.1 | 1-deoxy-D-xylulose-5-phosphate_reductoisomerase_[ <i>Bacillus_cereus</i> ] | CPTF_zcontrol   | 941635.6667 | 115519.4091 | 12.26795174 |
| UIJ64774.1 | ribosome_recycling_factor_[ <i>Bacillus_cereus</i> ]                       | CPTF_Al         | 5540425     | 1012554.447 | 18.27575407 |
| UIJ64774.1 | ribosome_recycling_factor_[ <i>Bacillus_cereus</i> ]                       | CPTF_Cd         | 7341615.333 | 454383.0575 | 6.189142809 |
| UIJ64774.1 | ribosome_recycling_factor_[ <i>Bacillus_cereus</i> ]                       | CPTF_Co         | 4152785     | 1563103.751 | 37.63989109 |
| UIJ64774.1 | ribosome_recycling_factor_[ <i>Bacillus_cereus</i> ]                       | CPTF_Cu         | 3956389.667 | 308216.5979 | 7.790349886 |
| UIJ64774.1 | ribosome_recycling_factor_[ <i>Bacillus_cereus</i> ]                       | CPTF_Fe         | 5639539.133 | 1518921.31  | 26.93342973 |
| UIJ64774.1 | ribosome_recycling_factor_[ <i>Bacillus_cereus</i> ]                       | CPTF_Mn         | 6304880     | 2081650.446 | 33.01649588 |
| UIJ64774.1 | ribosome_recycling_factor_[ <i>Bacillus_cereus</i> ]                       | CPTF_Ni         | 2468949.667 | 68999.2393  | 2.794679869 |
| UIJ64774.1 | ribosome_recycling_factor_[ <i>Bacillus_cereus</i> ]                       | CPTF_U          | 3734296.667 | 162220.0172 | 4.344058111 |
| UIJ64774.1 | ribosome_recycling_factor_[ <i>Bacillus_cereus</i> ]                       | CPTF_metals_mix | 7881660     | 1268376.681 | 16.09276068 |
| UIJ64774.1 | ribosome_recycling_factor_[ <i>Bacillus_cereus</i> ]                       | CPTF_zcontrol   | 4700891.667 | 1796385.407 | 38.21371634 |
| UIJ64775.1 | UMP_kinase_[ <i>Bacillus_cereus</i> ]                                      | CPTF_Al         | 2059809     | 385097.0838 | 18.69576663 |
| UIJ64775.1 | UMP_kinase_[ <i>Bacillus_cereus</i> ]                                      | CPTF_Cd         | 2546488.9   | 72371.27476 | 2.842002365 |
| UIJ64775.1 | UMP_kinase_[ <i>Bacillus_cereus</i> ]                                      | CPTF_Co         | 1997008.333 | 244107.4452 | 12.22365681 |
| UIJ64775.1 | UMP_kinase_[ <i>Bacillus_cereus</i> ]                                      | CPTF_Cu         | 1704528.367 | 135124.3361 | 7.927373854 |
| UIJ64775.1 | UMP_kinase_[ <i>Bacillus_cereus</i> ]                                      | CPTF_Fe         | 2132648.333 | 362607.42   | 17.00268227 |
| UIJ64775.1 | UMP_kinase_[ <i>Bacillus_cereus</i> ]                                      | CPTF_Mn         | 1996973     | 671130.8085 | 33.60740523 |

|            |                                                                                                              |                 |             |             |             |
|------------|--------------------------------------------------------------------------------------------------------------|-----------------|-------------|-------------|-------------|
| UIJ64775.1 | UMP_kinase_[Bacillus_cereus]                                                                                 | CPTF_Ni         | 686900.8333 | 295645.1785 | 43.04044546 |
| UIJ64775.1 | UMP_kinase_[Bacillus_cereus]                                                                                 | CPTF_U          | 1230245.333 | 343979.6832 | 27.96025101 |
| UIJ64775.1 | UMP_kinase_[Bacillus_cereus]                                                                                 | CPTF_metals_mix | 2001135     | 37959.36463 | 1.896891745 |
| UIJ64775.1 | UMP_kinase_[Bacillus_cereus]                                                                                 | CPTF_zcontrol   | 1873539.667 | 571123.2555 | 30.48364898 |
| UIJ64776.1 | translation_elongation_factor_Ts_[Bacillus_cereus]                                                           | CPTF_Al         | 17015798.63 | 978993.4957 | 5.753438418 |
| UIJ64776.1 | translation_elongation_factor_Ts_[Bacillus_cereus]                                                           | CPTF_Cd         | 16560167.1  | 1265614.967 | 7.642525338 |
| UIJ64776.1 | translation_elongation_factor_Ts_[Bacillus_cereus]                                                           | CPTF_Co         | 18286523.3  | 738742.2297 | 4.039817835 |
| UIJ64776.1 | translation_elongation_factor_Ts_[Bacillus_cereus]                                                           | CPTF_Cu         | 16541666.03 | 673793.0674 | 4.073308372 |
| UIJ64776.1 | translation_elongation_factor_Ts_[Bacillus_cereus]                                                           | CPTF_Fe         | 15648478.43 | 596586.0104 | 3.812421846 |
| UIJ64776.1 | translation_elongation_factor_Ts_[Bacillus_cereus]                                                           | CPTF_Mn         | 16837043.57 | 1865738.79  | 11.08115438 |
| UIJ64776.1 | translation_elongation_factor_Ts_[Bacillus_cereus]                                                           | CPTF_Ni         | 16169523.1  | 563411.4856 | 3.484403851 |
| UIJ64776.1 | translation_elongation_factor_Ts_[Bacillus_cereus]                                                           | CPTF_U          | 13456077.9  | 789054.1444 | 5.863923725 |
| UIJ64776.1 | translation_elongation_factor_Ts_[Bacillus_cereus]                                                           | CPTF_metals_mix | 16841332.17 | 391273.0821 | 2.32329057  |
| UIJ64776.1 | translation_elongation_factor_Ts_[Bacillus_cereus]                                                           | CPTF_zcontrol   | 15318670.87 | 506989.8371 | 3.309620277 |
| UIJ64777.1 | 30S_ribosomal_protein_S2_[Bacillus_cereus]                                                                   | CPTF_Al         | 9959371.167 | 942316.9684 | 9.461611106 |
| UIJ64777.1 | 30S_ribosomal_protein_S2_[Bacillus_cereus]                                                                   | CPTF_Cd         | 10404130.13 | 963070.2324 | 9.256614633 |
| UIJ64777.1 | 30S_ribosomal_protein_S2_[Bacillus_cereus]                                                                   | CPTF_Co         | 11377116.07 | 85343.6956  | 0.750134701 |
| UIJ64777.1 | 30S_ribosomal_protein_S2_[Bacillus_cereus]                                                                   | CPTF_Cu         | 11200485.9  | 553977.4286 | 4.946012464 |
| UIJ64777.1 | 30S_ribosomal_protein_S2_[Bacillus_cereus]                                                                   | CPTF_Fe         | 9753693.867 | 577277.6077 | 5.918553684 |
| UIJ64777.1 | 30S_ribosomal_protein_S2_[Bacillus_cereus]                                                                   | CPTF_Mn         | 9890232.433 | 2274474.208 | 22.99717649 |
| UIJ64777.1 | 30S_ribosomal_protein_S2_[Bacillus_cereus]                                                                   | CPTF_Ni         | 9116967.167 | 1191341.571 | 13.06730132 |
| UIJ64777.1 | 30S_ribosomal_protein_S2_[Bacillus_cereus]                                                                   | CPTF_U          | 7540704.967 | 898521.33   | 11.91561444 |
| UIJ64777.1 | 30S_ribosomal_protein_S2_[Bacillus_cereus]                                                                   | CPTF_metals_mix | 11119053.37 | 1114248.341 | 10.02107197 |
| UIJ64777.1 | 30S_ribosomal_protein_S2_[Bacillus_cereus]                                                                   | CPTF_zcontrol   | 9799585.167 | 456188.2519 | 4.655179215 |
| UIJ64778.1 | GTP-sensing_pleiotropic_transcriptional_regulator_CodY_[Bacillus_cereus]                                     | CPTF_Al         | 6657470.333 | 453061.0158 | 6.805302813 |
| UIJ64778.1 | GTP-sensing_pleiotropic_transcriptional_regulator_CodY_[Bacillus_cereus]                                     | CPTF_Cd         | 7688845.667 | 190237.2918 | 2.47419834  |
| UIJ64778.1 | GTP-sensing_pleiotropic_transcriptional_regulator_CodY_[Bacillus_cereus]                                     | CPTF_Co         | 7205657.333 | 616118.7457 | 8.550486336 |
| UIJ64778.1 | GTP-sensing_pleiotropic_transcriptional_regulator_CodY_[Bacillus_cereus]                                     | CPTF_Cu         | 7207018     | 580424.6377 | 8.053603276 |
| UIJ64778.1 | GTP-sensing_pleiotropic_transcriptional_regulator_CodY_[Bacillus_cereus]                                     | CPTF_Fe         | 7277652     | 932506.6571 | 12.81329002 |
| UIJ64778.1 | GTP-sensing_pleiotropic_transcriptional_regulator_CodY_[Bacillus_cereus]                                     | CPTF_Mn         | 7195192.7   | 923521.5923 | 12.83525863 |
| UIJ64778.1 | GTP-sensing_pleiotropic_transcriptional_regulator_CodY_[Bacillus_cereus]                                     | CPTF_Ni         | 6154961.333 | 324371.0565 | 5.270074643 |
| UIJ64778.1 | GTP-sensing_pleiotropic_transcriptional_regulator_CodY_[Bacillus_cereus]                                     | CPTF_U          | 6385201.033 | 1360665.454 | 21.3096729  |
| UIJ64778.1 | GTP-sensing_pleiotropic_transcriptional_regulator_CodY_[Bacillus_cereus]                                     | CPTF_metals_mix | 10671316    | 528025.9015 | 4.94808608  |
| UIJ64778.1 | GTP-sensing_pleiotropic_transcriptional_regulator_CodY_[Bacillus_cereus]                                     | CPTF_zcontrol   | 7024979     | 500818.5447 | 7.129110916 |
| UIJ64779.1 | ATP-dependent_protease_ATPase_subunit_HslU_[Bacillus_cereus]                                                 | CPTF_Al         | 3323256.633 | 367525.0588 | 11.05918379 |
| UIJ64779.1 | ATP-dependent_protease_ATPase_subunit_HslU_[Bacillus_cereus]                                                 | CPTF_Cd         | 4069565.6   | 490373.4547 | 12.04977393 |
| UIJ64779.1 | ATP-dependent_protease_ATPase_subunit_HslU_[Bacillus_cereus]                                                 | CPTF_Co         | 3697872.733 | 544877.737  | 14.73489696 |
| UIJ64779.1 | ATP-dependent_protease_ATPase_subunit_HslU_[Bacillus_cereus]                                                 | CPTF_Cu         | 3359687.267 | 381884.6132 | 11.36667145 |
| UIJ64779.1 | ATP-dependent_protease_ATPase_subunit_HslU_[Bacillus_cereus]                                                 | CPTF_Fe         | 3481026.567 | 387225.4193 | 11.12388578 |
| UIJ64779.1 | ATP-dependent_protease_ATPase_subunit_HslU_[Bacillus_cereus]                                                 | CPTF_Mn         | 3735714.167 | 767459.6289 | 20.54385305 |
| UIJ64779.1 | ATP-dependent_protease_ATPase_subunit_HslU_[Bacillus_cereus]                                                 | CPTF_Ni         | 3750483.033 | 888390.4425 | 23.68736066 |
| UIJ64779.1 | ATP-dependent_protease_ATPase_subunit_HslU_[Bacillus_cereus]                                                 | CPTF_U          | 3294428.667 | 288554.5245 | 8.75886394  |
| UIJ64779.1 | ATP-dependent_protease_ATPase_subunit_HslU_[Bacillus_cereus]                                                 | CPTF_metals_mix | 7186197.233 | 831265.1659 | 11.56752506 |
| UIJ64779.1 | ATP-dependent_protease_ATPase_subunit_HslU_[Bacillus_cereus]                                                 | CPTF_zcontrol   | 3031733     | 142050.6649 | 4.68546092  |
| UIJ64780.1 | ATP-dependent_protease_proteolytic_subunit_HslV_[Bacillus_cereus]                                            | CPTF_Al         | 0           | 0           | 0           |
| UIJ64780.1 | ATP-dependent_protease_proteolytic_subunit_HslV_[Bacillus_cereus]                                            | CPTF_Cd         | 0           | 0           | 0           |
| UIJ64780.1 | ATP-dependent_protease_proteolytic_subunit_HslV_[Bacillus_cereus]                                            | CPTF_Co         | 0           | 0           | 0           |
| UIJ64780.1 | ATP-dependent_protease_proteolytic_subunit_HslV_[Bacillus_cereus]                                            | CPTF_Cu         | 0           | 0           | 0           |
| UIJ64780.1 | ATP-dependent_protease_proteolytic_subunit_HslV_[Bacillus_cereus]                                            | CPTF_Fe         | 0           | 0           | 0           |
| UIJ64780.1 | ATP-dependent_protease_proteolytic_subunit_HslV_[Bacillus_cereus]                                            | CPTF_Mn         | 55986.66667 | 96971.75121 | 173.2050808 |
| UIJ64780.1 | ATP-dependent_protease_proteolytic_subunit_HslV_[Bacillus_cereus]                                            | CPTF_Ni         | 0           | 0           | 0           |
| UIJ64780.1 | ATP-dependent_protease_proteolytic_subunit_HslV_[Bacillus_cereus]                                            | CPTF_U          | 0           | 0           | 0           |
| UIJ64780.1 | ATP-dependent_protease_proteolytic_subunit_HslV_[Bacillus_cereus]                                            | CPTF_metals_mix | 140261.6667 | 242940.333  | 173.2050808 |
| UIJ64780.1 | ATP-dependent_protease_proteolytic_subunit_HslV_[Bacillus_cereus]                                            | CPTF_zcontrol   | 0           | 0           | 0           |
| UIJ64782.1 | FADH(2)-oxidizing_methylenetetrahydrofolate-tRNA-(uracil(54)-C(5))-methyltransferase_TrmFO_[Bacillus_cereus] | CPTF_Al         | 305539.7    | 83685.56388 | 27.38942399 |
| UIJ64782.1 | FADH(2)-oxidizing_methylenetetrahydrofolate-tRNA-(uracil(54)-C(5))-methyltransferase_TrmFO_[Bacillus_cereus] | CPTF_Cd         | 331763.3333 | 145651.0916 | 43.90210641 |
| UIJ64782.1 | FADH(2)-oxidizing_methylenetetrahydrofolate-tRNA-(uracil(54)-C(5))-methyltransferase_TrmFO_[Bacillus_cereus] | CPTF_Co         | 420358.9333 | 114840.0541 | 27.31952767 |
| UIJ64782.1 | FADH(2)-oxidizing_methylenetetrahydrofolate-tRNA-(uracil(54)-C(5))-methyltransferase_TrmFO_[Bacillus_cereus] | CPTF_Cu         | 424904.5333 | 110889.4858 | 26.09750595 |
| UIJ64782.1 | FADH(2)-oxidizing_methylenetetrahydrofolate-tRNA-(uracil(54)-C(5))-methyltransferase_TrmFO_[Bacillus_cereus] | CPTF_Fe         | 267629.3333 | 232088.4435 | 86.72010673 |
| UIJ64782.1 | FADH(2)-oxidizing_methylenetetrahydrofolate-tRNA-(uracil(54)-C(5))-methyltransferase_TrmFO_[Bacillus_cereus] | CPTF_Mn         | 340512      | 66428.54237 | 19.50842918 |
| UIJ64782.1 | FADH(2)-oxidizing_methylenetetrahydrofolate-tRNA-(uracil(54)-C(5))-methyltransferase_TrmFO_[Bacillus_cereus] | CPTF_Ni         | 437708.4667 | 22900.4145  | 5.231887488 |

|            |                                                                                                              |                 |             |             |             |
|------------|--------------------------------------------------------------------------------------------------------------|-----------------|-------------|-------------|-------------|
| UIJ64782.1 | FADH(2)-oxidizing_methylenetetrahydrofolate-tRNA-(uracil(54)-C(5))-methyltransferase_TrmFO [Bacillus_cereus] | CPTF_U          | 261097      | 226184.8716 | 86.62867501 |
| UIJ64782.1 | FADH(2)-oxidizing_methylenetetrahydrofolate-tRNA-(uracil(54)-C(5))-methyltransferase_TrmFO [Bacillus_cereus] | CPTF_metals_mix | 447438.0667 | 49666.54335 | 11.10020516 |
| UIJ64782.1 | FADH(2)-oxidizing_methylenetetrahydrofolate-tRNA-(uracil(54)-C(5))-methyltransferase_TrmFO [Bacillus_cereus] | CPTF_zcontrol   | 261399      | 227016.2262 | 86.84663148 |
| UIJ64783.1 | type_I_DNA_topoisomerase [Bacillus_cereus]                                                                   | CPTF_Al         | 641905.5    | 245504.4071 | 38.24619155 |
| UIJ64783.1 | type_I_DNA_topoisomerase [Bacillus_cereus]                                                                   | CPTF_Cd         | 524232.8667 | 99363.71479 | 18.95411774 |
| UIJ64783.1 | type_I_DNA_topoisomerase [Bacillus_cereus]                                                                   | CPTF_Co         | 1008372     | 83166.42657 | 8.247593801 |
| UIJ64783.1 | type_I_DNA_topoisomerase [Bacillus_cereus]                                                                   | CPTF_Cu         | 1411964.433 | 252755.5473 | 17.90098542 |
| UIJ64783.1 | type_I_DNA_topoisomerase [Bacillus_cereus]                                                                   | CPTF_Fe         | 704660.1333 | 189891.888  | 26.94801068 |
| UIJ64783.1 | type_I_DNA_topoisomerase [Bacillus_cereus]                                                                   | CPTF_Mn         | 608014.2333 | 476908.2346 | 78.43701816 |
| UIJ64783.1 | type_I_DNA_topoisomerase [Bacillus_cereus]                                                                   | CPTF_Ni         | 716196.5    | 108619.917  | 15.16621723 |
| UIJ64783.1 | type_I_DNA_topoisomerase [Bacillus_cereus]                                                                   | CPTF_U          | 205247.4667 | 167036.9838 | 81.3832134  |
| UIJ64783.1 | type_I_DNA_topoisomerase [Bacillus_cereus]                                                                   | CPTF_metals_mix | 925828.1    | 212057.2062 | 22.90459819 |
| UIJ64783.1 | type_I_DNA_topoisomerase [Bacillus_cereus]                                                                   | CPTF_zcontrol   | 689024.3667 | 103202.7967 | 14.97810553 |
| UIJ64785.1 | succinate-CoA_ligase_subunit_alpha [Bacillus_cereus]                                                         | CPTF_Al         | 5434155.333 | 810842.1201 | 14.9212172  |
| UIJ64785.1 | succinate-CoA_ligase_subunit_alpha [Bacillus_cereus]                                                         | CPTF_Cd         | 7058864.067 | 963872.8201 | 13.65478654 |
| UIJ64785.1 | succinate-CoA_ligase_subunit_alpha [Bacillus_cereus]                                                         | CPTF_Co         | 4581536.633 | 883269.6034 | 19.27889427 |
| UIJ64785.1 | succinate-CoA_ligase_subunit_alpha [Bacillus_cereus]                                                         | CPTF_Cu         | 4889389.933 | 278334.5699 | 5.692623695 |
| UIJ64785.1 | succinate-CoA_ligase_subunit_alpha [Bacillus_cereus]                                                         | CPTF_Fe         | 5190152.667 | 611758.0226 | 11.78689842 |
| UIJ64785.1 | succinate-CoA_ligase_subunit_alpha [Bacillus_cereus]                                                         | CPTF_Mn         | 5706681.8   | 1848514.696 | 32.39211087 |
| UIJ64785.1 | succinate-CoA_ligase_subunit_alpha [Bacillus_cereus]                                                         | CPTF_Ni         | 3630817.6   | 451157.8402 | 12.42579193 |
| UIJ64785.1 | succinate-CoA_ligase_subunit_alpha [Bacillus_cereus]                                                         | CPTF_U          | 3310879.767 | 351478.041  | 10.61585034 |
| UIJ64785.1 | succinate-CoA_ligase_subunit_alpha [Bacillus_cereus]                                                         | CPTF_metals_mix | 8330408.9   | 551104.3385 | 6.615573679 |
| UIJ64785.1 | succinate-CoA_ligase_subunit_alpha [Bacillus_cereus]                                                         | CPTF_zcontrol   | 4744039.333 | 325741.2774 | 6.8663275   |
| UIJ64786.1 | ADP-forming_succinate-CoA_ligase_subunit_beta [Bacillus_cereus]                                              | CPTF_Al         | 10421510.4  | 281935.2782 | 2.705320701 |
| UIJ64786.1 | ADP-forming_succinate-CoA_ligase_subunit_beta [Bacillus_cereus]                                              | CPTF_Cd         | 11014600.9  | 310990.4232 | 2.823437962 |
| UIJ64786.1 | ADP-forming_succinate-CoA_ligase_subunit_beta [Bacillus_cereus]                                              | CPTF_Co         | 11182954.4  | 369079.0204 | 3.300371326 |
| UIJ64786.1 | ADP-forming_succinate-CoA_ligase_subunit_beta [Bacillus_cereus]                                              | CPTF_Cu         | 11152597.63 | 1191652.922 | 10.68498085 |
| UIJ64786.1 | ADP-forming_succinate-CoA_ligase_subunit_beta [Bacillus_cereus]                                              | CPTF_Fe         | 9616329.7   | 1044416.263 | 10.86086163 |
| UIJ64786.1 | ADP-forming_succinate-CoA_ligase_subunit_beta [Bacillus_cereus]                                              | CPTF_Mn         | 10504297.77 | 1749669.235 | 16.65669875 |
| UIJ64786.1 | ADP-forming_succinate-CoA_ligase_subunit_beta [Bacillus_cereus]                                              | CPTF_Ni         | 10116553.6  | 1179400.768 | 11.658128   |
| UIJ64786.1 | ADP-forming_succinate-CoA_ligase_subunit_beta [Bacillus_cereus]                                              | CPTF_U          | 8411011.333 | 307353.4805 | 3.65417984  |
| UIJ64786.1 | ADP-forming_succinate-CoA_ligase_subunit_beta [Bacillus_cereus]                                              | CPTF_metals_mix | 12298596.33 | 1435139.682 | 11.66913397 |
| UIJ64786.1 | ADP-forming_succinate-CoA_ligase_subunit_beta [Bacillus_cereus]                                              | CPTF_zcontrol   | 10207836.57 | 364573.3116 | 3.571504199 |
| UIJ64788.1 | ribosome_biogenesis_GTPase_YlqF [Bacillus_cereus]                                                            | CPTF_Al         | 240452      | 127304.5423 | 52.94384838 |
| UIJ64788.1 | ribosome_biogenesis_GTPase_YlqF [Bacillus_cereus]                                                            | CPTF_Cd         | 527604.7333 | 323910.8309 | 61.39270755 |
| UIJ64788.1 | ribosome_biogenesis_GTPase_YlqF [Bacillus_cereus]                                                            | CPTF_Co         | 295797      | 12771.00157 | 4.317488536 |
| UIJ64788.1 | ribosome_biogenesis_GTPase_YlqF [Bacillus_cereus]                                                            | CPTF_Cu         | 249969.6    | 83647.53081 | 33.46308143 |
| UIJ64788.1 | ribosome_biogenesis_GTPase_YlqF [Bacillus_cereus]                                                            | CPTF_Fe         | 439184.3333 | 108289.66   | 24.6569952  |
| UIJ64788.1 | ribosome_biogenesis_GTPase_YlqF [Bacillus_cereus]                                                            | CPTF_Mn         | 352165      | 173253.4093 | 49.19665762 |
| UIJ64788.1 | ribosome_biogenesis_GTPase_YlqF [Bacillus_cereus]                                                            | CPTF_Ni         | 200858.7667 | 25175.50356 | 12.53393316 |
| UIJ64788.1 | ribosome_biogenesis_GTPase_YlqF [Bacillus_cereus]                                                            | CPTF_U          | 245433.1    | 109298.2698 | 44.5328156  |
| UIJ64788.1 | ribosome_biogenesis_GTPase_YlqF [Bacillus_cereus]                                                            | CPTF_metals_mix | 540980.6    | 134435.4425 | 24.85032596 |
| UIJ64788.1 | ribosome_biogenesis_GTPase_YlqF [Bacillus_cereus]                                                            | CPTF_zcontrol   | 202240.1    | 122219.5119 | 60.43287749 |
| UIJ64789.1 | signal_peptidase_I [Bacillus_cereus]                                                                         | CPTF_Al         | 0           | 0           | 0           |
| UIJ64789.1 | signal_peptidase_I [Bacillus_cereus]                                                                         | CPTF_Cd         | 143326.1    | 33741.26788 | 23.54160748 |
| UIJ64789.1 | signal_peptidase_I [Bacillus_cereus]                                                                         | CPTF_Co         | 59863.63333 | 52961.00958 | 88.46942063 |
| UIJ64789.1 | signal_peptidase_I [Bacillus_cereus]                                                                         | CPTF_Cu         | 66034.1     | 58152.67048 | 88.06460674 |
| UIJ64789.1 | signal_peptidase_I [Bacillus_cereus]                                                                         | CPTF_Fe         | 0           | 0           | 0           |
| UIJ64789.1 | signal_peptidase_I [Bacillus_cereus]                                                                         | CPTF_Mn         | 0           | 0           | 0           |
| UIJ64789.1 | signal_peptidase_I [Bacillus_cereus]                                                                         | CPTF_Ni         | 124549.6    | 24557.47432 | 19.71702384 |
| UIJ64789.1 | signal_peptidase_I [Bacillus_cereus]                                                                         | CPTF_U          | 108074.3333 | 95325.30862 | 88.20346671 |
| UIJ64789.1 | signal_peptidase_I [Bacillus_cereus]                                                                         | CPTF_metals_mix | 22856.66667 | 39588.90796 | 173.2050808 |
| UIJ64789.1 | signal_peptidase_I [Bacillus_cereus]                                                                         | CPTF_zcontrol   | 0           | 0           | 0           |
| UIJ64790.1 | 50S_ribosomal_protein_L19 [Bacillus_cereus]                                                                  | CPTF_Al         | 19221701.67 | 562410.8792 | 2.92591618  |
| UIJ64790.1 | 50S_ribosomal_protein_L19 [Bacillus_cereus]                                                                  | CPTF_Cd         | 18786139    | 870253.6097 | 4.632423989 |
| UIJ64790.1 | 50S_ribosomal_protein_L19 [Bacillus_cereus]                                                                  | CPTF_Co         | 20095652.33 | 1695776.995 | 8.438526734 |
| UIJ64790.1 | 50S_ribosomal_protein_L19 [Bacillus_cereus]                                                                  | CPTF_Cu         | 19444093    | 1840235.374 | 9.464238696 |
| UIJ64790.1 | 50S_ribosomal_protein_L19 [Bacillus_cereus]                                                                  | CPTF_Fe         | 20240171.33 | 798912.3411 | 3.947161948 |
| UIJ64790.1 | 50S_ribosomal_protein_L19 [Bacillus_cereus]                                                                  | CPTF_Mn         | 19931834.33 | 588161.097  | 2.950862862 |
| UIJ64790.1 | 50S_ribosomal_protein_L19 [Bacillus_cereus]                                                                  | CPTF_Ni         | 20199591.33 | 1262251.341 | 6.248895439 |
| UIJ64790.1 | 50S_ribosomal_protein_L19 [Bacillus_cereus]                                                                  | CPTF_U          | 21471021.33 | 1700308.86  | 7.919087002 |

|            |                                                                    |                 |             |             |             |
|------------|--------------------------------------------------------------------|-----------------|-------------|-------------|-------------|
| UIJ64790.1 | 50S_ribosomal_protein_L19_[Bacillus_cereus]                        | CPTF_metals_mix | 18353894    | 1484620.357 | 8.088857639 |
| UIJ64790.1 | 50S_ribosomal_protein_L19_[Bacillus_cereus]                        | CPTF_zcontrol   | 20303365.33 | 974547.8641 | 4.799932662 |
| UIJ64792.1 | ribosome_maturation_factor_RimM_[Bacillus_cereus]                  | CPTF_Al         | 54623       | 94609.81126 | 173.2050808 |
| UIJ64792.1 | ribosome_maturation_factor_RimM_[Bacillus_cereus]                  | CPTF_Cd         | 34572       | 59880.46052 | 173.2050808 |
| UIJ64792.1 | ribosome_maturation_factor_RimM_[Bacillus_cereus]                  | CPTF_Co         | 73463.63333 | 65739.88282 | 89.48629387 |
| UIJ64792.1 | ribosome_maturation_factor_RimM_[Bacillus_cereus]                  | CPTF_Cu         | 11723       | 20304.83162 | 173.2050808 |
| UIJ64792.1 | ribosome_maturation_factor_RimM_[Bacillus_cereus]                  | CPTF_Fe         | 75175.56667 | 68597.287   | 91.2494452  |
| UIJ64792.1 | ribosome_maturation_factor_RimM_[Bacillus_cereus]                  | CPTF_Mn         | 60802.33333 | 105312.7306 | 173.2050808 |
| UIJ64792.1 | ribosome_maturation_factor_RimM_[Bacillus_cereus]                  | CPTF_Ni         | 8627.966667 | 14944.07663 | 173.2050808 |
| UIJ64792.1 | ribosome_maturation_factor_RimM_[Bacillus_cereus]                  | CPTF_U          | 67826.66667 | 117479.2328 | 173.2050808 |
| UIJ64792.1 | ribosome_maturation_factor_RimM_[Bacillus_cereus]                  | CPTF_metals_mix | 26711.76667 | 23147.26442 | 86.65568515 |
| UIJ64792.1 | ribosome_maturation_factor_RimM_[Bacillus_cereus]                  | CPTF_zcontrol   | 0           | 0           | 0           |
| UIJ64794.1 | 30S_ribosomal_protein_S16_[Bacillus_cereus]                        | CPTF_Al         | 2143333.333 | 275741.4248 | 12.86507425 |
| UIJ64794.1 | 30S_ribosomal_protein_S16_[Bacillus_cereus]                        | CPTF_Cd         | 2083333.333 | 143643.0762 | 6.894867656 |
| UIJ64794.1 | 30S_ribosomal_protein_S16_[Bacillus_cereus]                        | CPTF_Co         | 2200000     | 112694.2767 | 5.122467123 |
| UIJ64794.1 | 30S_ribosomal_protein_S16_[Bacillus_cereus]                        | CPTF_Cu         | 2090000     | 43588.98944 | 2.085597581 |
| UIJ64794.1 | 30S_ribosomal_protein_S16_[Bacillus_cereus]                        | CPTF_Fe         | 2203333.333 | 190875.1774 | 8.66301864  |
| UIJ64794.1 | 30S_ribosomal_protein_S16_[Bacillus_cereus]                        | CPTF_Mn         | 2301260.333 | 723078.8306 | 31.42099223 |
| UIJ64794.1 | 30S_ribosomal_protein_S16_[Bacillus_cereus]                        | CPTF_Ni         | 2100000     | 130766.9683 | 6.226998491 |
| UIJ64794.1 | 30S_ribosomal_protein_S16_[Bacillus_cereus]                        | CPTF_U          | 2120000     | 345976.8778 | 16.31966405 |
| UIJ64794.1 | 30S_ribosomal_protein_S16_[Bacillus_cereus]                        | CPTF_metals_mix | 4009634     | 651951.6055 | 16.25962882 |
| UIJ64794.1 | 30S_ribosomal_protein_S16_[Bacillus_cereus]                        | CPTF_zcontrol   | 1976666.667 | 68068.59286 | 3.443650353 |
| UIJ64795.1 | signal_recognition_particle_protein_[Bacillus_cereus]              | CPTF_Al         | 852981.4667 | 151934.2314 | 17.81213746 |
| UIJ64795.1 | signal_recognition_particle_protein_[Bacillus_cereus]              | CPTF_Cd         | 1153844.533 | 68772.62961 | 5.960302937 |
| UIJ64795.1 | signal_recognition_particle_protein_[Bacillus_cereus]              | CPTF_Co         | 1027278.6   | 168069.3577 | 16.36064041 |
| UIJ64795.1 | signal_recognition_particle_protein_[Bacillus_cereus]              | CPTF_Cu         | 819167.2    | 96306.60764 | 11.75664842 |
| UIJ64795.1 | signal_recognition_particle_protein_[Bacillus_cereus]              | CPTF_Fe         | 953154.3    | 163957.9481 | 17.20161658 |
| UIJ64795.1 | signal_recognition_particle_protein_[Bacillus_cereus]              | CPTF_Mn         | 947883.5667 | 326216.9167 | 34.41529405 |
| UIJ64795.1 | signal_recognition_particle_protein_[Bacillus_cereus]              | CPTF_Ni         | 543729.4667 | 74616.74264 | 13.72313756 |
| UIJ64795.1 | signal_recognition_particle_protein_[Bacillus_cereus]              | CPTF_U          | 702904.6    | 104505.1442 | 14.86761421 |
| UIJ64795.1 | signal_recognition_particle_protein_[Bacillus_cereus]              | CPTF_metals_mix | 1866639.367 | 46579.68541 | 2.495376785 |
| UIJ64795.1 | signal_recognition_particle_protein_[Bacillus_cereus]              | CPTF_zcontrol   | 718240.5333 | 106800.4676 | 14.86973551 |
| UIJ64797.1 | signal_recognition_particle-docking_protein_FtsY_[Bacillus_cereus] | CPTF_Al         | 1231185.667 | 212384.3302 | 17.25039008 |
| UIJ64797.1 | signal_recognition_particle-docking_protein_FtsY_[Bacillus_cereus] | CPTF_Cd         | 1458253.667 | 163764.7393 | 11.23019562 |
| UIJ64797.1 | signal_recognition_particle-docking_protein_FtsY_[Bacillus_cereus] | CPTF_Co         | 1267437.667 | 204919.0452 | 16.16797817 |
| UIJ64797.1 | signal_recognition_particle-docking_protein_FtsY_[Bacillus_cereus] | CPTF_Cu         | 1369387.6   | 32362.42766 | 2.3632774   |
| UIJ64797.1 | signal_recognition_particle-docking_protein_FtsY_[Bacillus_cereus] | CPTF_Fe         | 1265303     | 265142.0264 | 20.95482476 |
| UIJ64797.1 | signal_recognition_particle-docking_protein_FtsY_[Bacillus_cereus] | CPTF_Mn         | 1132652.667 | 325025.3106 | 28.69593832 |
| UIJ64797.1 | signal_recognition_particle-docking_protein_FtsY_[Bacillus_cereus] | CPTF_Ni         | 908221.6667 | 68574.04047 | 7.550363858 |
| UIJ64797.1 | signal_recognition_particle-docking_protein_FtsY_[Bacillus_cereus] | CPTF_U          | 1089409     | 276857.5547 | 25.41355494 |
| UIJ64797.1 | signal_recognition_particle-docking_protein_FtsY_[Bacillus_cereus] | CPTF_metals_mix | 1331108     | 148983.969  | 11.19247792 |
| UIJ64797.1 | signal_recognition_particle-docking_protein_FtsY_[Bacillus_cereus] | CPTF_zcontrol   | 1106900     | 182313.4123 | 16.47063079 |
| UIJ64799.1 | ribonuclease_III_[Bacillus_cereus]                                 | CPTF_Al         | 632548.5667 | 303368.9543 | 47.95978844 |
| UIJ64799.1 | ribonuclease_III_[Bacillus_cereus]                                 | CPTF_Cd         | 484325.0333 | 52885.5448  | 10.91943244 |
| UIJ64799.1 | ribonuclease_III_[Bacillus_cereus]                                 | CPTF_Co         | 816561.6333 | 284975.429  | 34.89943899 |
| UIJ64799.1 | ribonuclease_III_[Bacillus_cereus]                                 | CPTF_Cu         | 929067.9    | 353118.8251 | 38.00785982 |
| UIJ64799.1 | ribonuclease_III_[Bacillus_cereus]                                 | CPTF_Fe         | 850119.7333 | 432815.0164 | 50.91224206 |
| UIJ64799.1 | ribonuclease_III_[Bacillus_cereus]                                 | CPTF_Mn         | 795275.1333 | 646935.3759 | 81.34736631 |
| UIJ64799.1 | ribonuclease_III_[Bacillus_cereus]                                 | CPTF_Ni         | 858386.4333 | 280510.3443 | 32.67879517 |
| UIJ64799.1 | ribonuclease_III_[Bacillus_cereus]                                 | CPTF_U          | 618605      | 183121.8335 | 29.60238497 |
| UIJ64799.1 | ribonuclease_III_[Bacillus_cereus]                                 | CPTF_metals_mix | 288965.3333 | 81980.49818 | 28.37035752 |
| UIJ64799.1 | ribonuclease_III_[Bacillus_cereus]                                 | CPTF_zcontrol   | 854468.9667 | 406183.7997 | 47.53640162 |
| UIJ64800.1 | 3-oxoacyl-[acyl-carrier-protein]_reductase_[Bacillus_cereus]       | CPTF_Al         | 1355530.3   | 480882.0991 | 35.4755699  |
| UIJ64800.1 | 3-oxoacyl-[acyl-carrier-protein]_reductase_[Bacillus_cereus]       | CPTF_Cd         | 1999720.9   | 464533.6025 | 23.22992186 |
| UIJ64800.1 | 3-oxoacyl-[acyl-carrier-protein]_reductase_[Bacillus_cereus]       | CPTF_Co         | 1399460     | 253993.2226 | 18.14937351 |
| UIJ64800.1 | 3-oxoacyl-[acyl-carrier-protein]_reductase_[Bacillus_cereus]       | CPTF_Cu         | 1359902.7   | 195723.3963 | 14.3924559  |
| UIJ64800.1 | 3-oxoacyl-[acyl-carrier-protein]_reductase_[Bacillus_cereus]       | CPTF_Fe         | 1324659.6   | 335847.7534 | 25.35351372 |
| UIJ64800.1 | 3-oxoacyl-[acyl-carrier-protein]_reductase_[Bacillus_cereus]       | CPTF_Mn         | 1493732     | 875604.7674 | 58.61859874 |
| UIJ64800.1 | 3-oxoacyl-[acyl-carrier-protein]_reductase_[Bacillus_cereus]       | CPTF_Ni         | 988429.3333 | 32157.04903 | 3.253348312 |
| UIJ64800.1 | 3-oxoacyl-[acyl-carrier-protein]_reductase_[Bacillus_cereus]       | CPTF_U          | 701106.3667 | 145476.8574 | 20.74961295 |
| UIJ64800.1 | 3-oxoacyl-[acyl-carrier-protein]_reductase_[Bacillus_cereus]       | CPTF_metals_mix | 4093701     | 724851.2031 | 17.70650087 |

|            |                                                                       |                 |             |             |             |
|------------|-----------------------------------------------------------------------|-----------------|-------------|-------------|-------------|
| UIJ64800.1 | 3-oxoacyl-[acyl-carrier-protein]_reductase_[Bacillus_cereus]          | CPTF_zcontrol   | 1119395.733 | 189798.1501 | 16.95541125 |
| UIJ64801.1 | ACP_S-malonyltransferase_[Bacillus_cereus]                            | CPTF_Al         | 743104.6333 | 78740.06066 | 10.59609335 |
| UIJ64801.1 | ACP_S-malonyltransferase_[Bacillus_cereus]                            | CPTF_Cd         | 673766.3333 | 37893.3287  | 5.624105395 |
| UIJ64801.1 | ACP_S-malonyltransferase_[Bacillus_cereus]                            | CPTF_Co         | 667452.4    | 40647.14676 | 6.089894464 |
| UIJ64801.1 | ACP_S-malonyltransferase_[Bacillus_cereus]                            | CPTF_Cu         | 630396.6667 | 46519.51726 | 7.379404068 |
| UIJ64801.1 | ACP_S-malonyltransferase_[Bacillus_cereus]                            | CPTF_Fe         | 765781.2    | 73340.63497 | 9.577231064 |
| UIJ64801.1 | ACP_S-malonyltransferase_[Bacillus_cereus]                            | CPTF_Mn         | 767017.6667 | 240827.5951 | 31.39792022 |
| UIJ64801.1 | ACP_S-malonyltransferase_[Bacillus_cereus]                            | CPTF_Ni         | 696562.3333 | 75949.70765 | 10.90350483 |
| UIJ64801.1 | ACP_S-malonyltransferase_[Bacillus_cereus]                            | CPTF_U          | 908006      | 113539.3269 | 12.50424853 |
| UIJ64801.1 | ACP_S-malonyltransferase_[Bacillus_cereus]                            | CPTF_metals_mix | 930655.5    | 171257.2903 | 18.40179211 |
| UIJ64801.1 | ACP_S-malonyltransferase_[Bacillus_cereus]                            | CPTF_zcontrol   | 803490.3333 | 86703.95493 | 10.79091451 |
| UIJ64802.1 | phosphate_acyltransferase_PlsX_[Bacillus_cereus]                      | CPTF_Al         | 111268.6667 | 109697.3034 | 98.58777561 |
| UIJ64802.1 | phosphate_acyltransferase_PlsX_[Bacillus_cereus]                      | CPTF_Cd         | 0           | 0           | 0           |
| UIJ64802.1 | phosphate_acyltransferase_PlsX_[Bacillus_cereus]                      | CPTF_Co         | 0           | 0           | 0           |
| UIJ64802.1 | phosphate_acyltransferase_PlsX_[Bacillus_cereus]                      | CPTF_Cu         | 0           | 0           | 0           |
| UIJ64802.1 | phosphate_acyltransferase_PlsX_[Bacillus_cereus]                      | CPTF_Fe         | 0           | 0           | 0           |
| UIJ64802.1 | phosphate_acyltransferase_PlsX_[Bacillus_cereus]                      | CPTF_Mn         | 0           | 0           | 0           |
| UIJ64802.1 | phosphate_acyltransferase_PlsX_[Bacillus_cereus]                      | CPTF_Ni         | 0           | 0           | 0           |
| UIJ64802.1 | phosphate_acyltransferase_PlsX_[Bacillus_cereus]                      | CPTF_U          | 93588.3333  | 162099.7483 | 173.2050808 |
| UIJ64802.1 | phosphate_acyltransferase_PlsX_[Bacillus_cereus]                      | CPTF_metals_mix | 352249.6667 | 277353.4307 | 78.73774114 |
| UIJ64802.1 | phosphate_acyltransferase_PlsX_[Bacillus_cereus]                      | CPTF_zcontrol   | 0           | 0           | 0           |
| UIJ64803.1 | transcription_factor_FapR_[Bacillus_cereus]                           | CPTF_Al         | 72038.36667 | 63582.10524 | 88.2614476  |
| UIJ64803.1 | transcription_factor_FapR_[Bacillus_cereus]                           | CPTF_Cd         | 102475.1667 | 7426.569943 | 7.247189914 |
| UIJ64803.1 | transcription_factor_FapR_[Bacillus_cereus]                           | CPTF_Co         | 50831.16667 | 44024.71309 | 86.60968451 |
| UIJ64803.1 | transcription_factor_FapR_[Bacillus_cereus]                           | CPTF_Cu         | 96726.66667 | 35552.4995  | 36.75563391 |
| UIJ64803.1 | transcription_factor_FapR_[Bacillus_cereus]                           | CPTF_Fe         | 29483.33333 | 35136.36702 | 119.1736586 |
| UIJ64803.1 | transcription_factor_FapR_[Bacillus_cereus]                           | CPTF_Mn         | 24458.96667 | 22128.53709 | 90.47208491 |
| UIJ64803.1 | transcription_factor_FapR_[Bacillus_cereus]                           | CPTF_Ni         | 406767.6667 | 510818.0838 | 125.5798151 |
| UIJ64803.1 | transcription_factor_FapR_[Bacillus_cereus]                           | CPTF_U          | 0           | 0           | 0           |
| UIJ64803.1 | transcription_factor_FapR_[Bacillus_cereus]                           | CPTF_metals_mix | 13342.5     | 23109.8879  | 173.2050808 |
| UIJ64803.1 | transcription_factor_FapR_[Bacillus_cereus]                           | CPTF_zcontrol   | 56219.46667 | 55657.77122 | 99.0008799  |
| UIJ64805.1 | DAK2_domain-containing_protein_[Bacillus_cereus]                      | CPTF_Al         | 5159093.8   | 385957.3196 | 7.481106849 |
| UIJ64805.1 | DAK2_domain-containing_protein_[Bacillus_cereus]                      | CPTF_Cd         | 5160938.967 | 603413.2366 | 11.69192739 |
| UIJ64805.1 | DAK2_domain-containing_protein_[Bacillus_cereus]                      | CPTF_Co         | 5836244.433 | 266290.8301 | 4.562708659 |
| UIJ64805.1 | DAK2_domain-containing_protein_[Bacillus_cereus]                      | CPTF_Cu         | 5808418.733 | 293459.9517 | 5.052320867 |
| UIJ64805.1 | DAK2_domain-containing_protein_[Bacillus_cereus]                      | CPTF_Fe         | 5095996.333 | 266365.9683 | 5.226965462 |
| UIJ64805.1 | DAK2_domain-containing_protein_[Bacillus_cereus]                      | CPTF_Mn         | 5024605.5   | 281290.1438 | 5.598253312 |
| UIJ64805.1 | DAK2_domain-containing_protein_[Bacillus_cereus]                      | CPTF_Ni         | 4720814.8   | 755358.034  | 16.00058604 |
| UIJ64805.1 | DAK2_domain-containing_protein_[Bacillus_cereus]                      | CPTF_U          | 4953821.833 | 369099.7273 | 7.450807471 |
| UIJ64805.1 | DAK2_domain-containing_protein_[Bacillus_cereus]                      | CPTF_metals_mix | 5928711.433 | 43969.41911 | 0.741635338 |
| UIJ64805.1 | DAK2_domain-containing_protein_[Bacillus_cereus]                      | CPTF_zcontrol   | 5352763.7   | 146395.1632 | 2.734945375 |
| UIJ64806.1 | Asp23/Gls24_family_envelope_stress_response_protein_[Bacillus_cereus] | CPTF_Al         | 3116666.667 | 479200.7234 | 15.37542428 |
| UIJ64806.1 | Asp23/Gls24_family_envelope_stress_response_protein_[Bacillus_cereus] | CPTF_Cd         | 2963333.333 | 142243.922  | 4.800132349 |
| UIJ64806.1 | Asp23/Gls24_family_envelope_stress_response_protein_[Bacillus_cereus] | CPTF_Co         | 2973333.333 | 239652.5262 | 8.060062542 |
| UIJ64806.1 | Asp23/Gls24_family_envelope_stress_response_protein_[Bacillus_cereus] | CPTF_Cu         | 2863333.333 | 284487.8439 | 9.935547517 |
| UIJ64806.1 | Asp23/Gls24_family_envelope_stress_response_protein_[Bacillus_cereus] | CPTF_Fe         | 3053333.333 | 202072.5942 | 6.618098064 |
| UIJ64806.1 | Asp23/Gls24_family_envelope_stress_response_protein_[Bacillus_cereus] | CPTF_Mn         | 3323333.333 | 267644.0422 | 8.053481712 |
| UIJ64806.1 | Asp23/Gls24_family_envelope_stress_response_protein_[Bacillus_cereus] | CPTF_Ni         | 320000      | 160000      | 5           |
| UIJ64806.1 | Asp23/Gls24_family_envelope_stress_response_protein_[Bacillus_cereus] | CPTF_U          | 3390000     | 205182.8453 | 6.052591306 |
| UIJ64806.1 | Asp23/Gls24_family_envelope_stress_response_protein_[Bacillus_cereus] | CPTF_metals_mix | 2077626.233 | 100499.9866 | 4.837250559 |
| UIJ64806.1 | Asp23/Gls24_family_envelope_stress_response_protein_[Bacillus_cereus] | CPTF_zcontrol   | 3720000     | 235796.5225 | 6.338616195 |
| UIJ64807.1 | 50S_ribosomal_protein_L28_[Bacillus_cereus]                           | CPTF_Al         | 1425548.833 | 182254.6956 | 12.78487915 |
| UIJ64807.1 | 50S_ribosomal_protein_L28_[Bacillus_cereus]                           | CPTF_Cd         | 1394773.233 | 196869.0096 | 14.11476825 |
| UIJ64807.1 | 50S_ribosomal_protein_L28_[Bacillus_cereus]                           | CPTF_Co         | 1563201.867 | 274948.0618 | 17.58877517 |
| UIJ64807.1 | 50S_ribosomal_protein_L28_[Bacillus_cereus]                           | CPTF_Cu         | 1485864.867 | 261994.7319 | 17.6324737  |
| UIJ64807.1 | 50S_ribosomal_protein_L28_[Bacillus_cereus]                           | CPTF_Fe         | 1496077.567 | 159919.781  | 10.6892707  |
| UIJ64807.1 | 50S_ribosomal_protein_L28_[Bacillus_cereus]                           | CPTF_Mn         | 1614540.6   | 198305.3881 | 12.28246525 |
| UIJ64807.1 | 50S_ribosomal_protein_L28_[Bacillus_cereus]                           | CPTF_Ni         | 1516262.6   | 142527.2233 | 9.399903637 |
| UIJ64807.1 | 50S_ribosomal_protein_L28_[Bacillus_cereus]                           | CPTF_U          | 1683968.333 | 353401.7394 | 20.98624615 |
| UIJ64807.1 | 50S_ribosomal_protein_L28_[Bacillus_cereus]                           | CPTF_metals_mix | 1107483.5   | 228955.5363 | 20.67349413 |
| UIJ64807.1 | 50S_ribosomal_protein_L28_[Bacillus_cereus]                           | CPTF_zcontrol   | 1749033     | 309022.3913 | 17.66818529 |

|            |                                                                        |                 |             |             |             |
|------------|------------------------------------------------------------------------|-----------------|-------------|-------------|-------------|
| UIJ64809.1 | ribulose-phosphate_3-epimerase [Bacillus_cereus]                       | CPTF_Al         | 85130.26667 | 44860.28154 | 52.69604254 |
| UIJ64809.1 | ribulose-phosphate_3-epimerase [Bacillus_cereus]                       | CPTF_Cd         | 98995.96667 | 34318.0584  | 34.66611778 |
| UIJ64809.1 | ribulose-phosphate_3-epimerase [Bacillus_cereus]                       | CPTF_Co         | 61532.03333 | 10991.78029 | 17.86350896 |
| UIJ64809.1 | ribulose-phosphate_3-epimerase [Bacillus_cereus]                       | CPTF_Cu         | 112744      | 20991.64579 | 18.61885847 |
| UIJ64809.1 | ribulose-phosphate_3-epimerase [Bacillus_cereus]                       | CPTF_Fe         | 32442.23333 | 28665.85431 | 88.35968232 |
| UIJ64809.1 | ribulose-phosphate_3-epimerase [Bacillus_cereus]                       | CPTF_Mn         | 35695.26667 | 31184.33275 | 87.36265522 |
| UIJ64809.1 | ribulose-phosphate_3-epimerase [Bacillus_cereus]                       | CPTF_Ni         | 55961.86667 | 55835.92899 | 99.77495804 |
| UIJ64809.1 | ribulose-phosphate_3-epimerase [Bacillus_cereus]                       | CPTF_U          | 58579.13333 | 51107.50444 | 87.24523826 |
| UIJ64809.1 | ribulose-phosphate_3-epimerase [Bacillus_cereus]                       | CPTF_metals_mix | 111345.8333 | 15701.4218  | 14.10149022 |
| UIJ64809.1 | ribulose-phosphate_3-epimerase [Bacillus_cereus]                       | CPTF_zcontrol   | 22151.33333 | 38367.23479 | 173.2050808 |
| UIJ64812.1 | Stp1/IreP_family_PP2C-type_Ser/Thr_phosphatase [Bacillus_cereus]       | CPTF_Al         | 0           | 0           | 0           |
| UIJ64812.1 | Stp1/IreP_family_PP2C-type_Ser/Thr_phosphatase [Bacillus_cereus]       | CPTF_Cd         | 6969.233333 | 12071.06622 | 173.2050808 |
| UIJ64812.1 | Stp1/IreP_family_PP2C-type_Ser/Thr_phosphatase [Bacillus_cereus]       | CPTF_Co         | 0           | 0           | 0           |
| UIJ64812.1 | Stp1/IreP_family_PP2C-type_Ser/Thr_phosphatase [Bacillus_cereus]       | CPTF_Cu         | 36243.8     | 31706.02649 | 87.47986273 |
| UIJ64812.1 | Stp1/IreP_family_PP2C-type_Ser/Thr_phosphatase [Bacillus_cereus]       | CPTF_Fe         | 21868.03333 | 37876.54479 | 173.2050808 |
| UIJ64812.1 | Stp1/IreP_family_PP2C-type_Ser/Thr_phosphatase [Bacillus_cereus]       | CPTF_Mn         | 25174.6     | 43603.68626 | 173.2050808 |
| UIJ64812.1 | Stp1/IreP_family_PP2C-type_Ser/Thr_phosphatase [Bacillus_cereus]       | CPTF_Ni         | 0           | 0           | 0           |
| UIJ64812.1 | Stp1/IreP_family_PP2C-type_Ser/Thr_phosphatase [Bacillus_cereus]       | CPTF_U          | 26919.6     | 46626.11492 | 173.2050808 |
| UIJ64812.1 | Stp1/IreP_family_PP2C-type_Ser/Thr_phosphatase [Bacillus_cereus]       | CPTF_metals_mix | 11215.46667 | 19425.7581  | 173.2050808 |
| UIJ64812.1 | Stp1/IreP_family_PP2C-type_Ser/Thr_phosphatase [Bacillus_cereus]       | CPTF_zcontrol   | 34553.13333 | 32770.93547 | 94.84215267 |
| UIJ64813.1 | 23S_rRNA_(adenine(2503)-C(2))-methyltransferase_RlmN [Bacillus_cereus] | CPTF_Al         | 186211.5    | 66485.48629 | 35.70428587 |
| UIJ64813.1 | 23S_rRNA_(adenine(2503)-C(2))-methyltransferase_RlmN [Bacillus_cereus] | CPTF_Cd         | 251269.2333 | 63341.77185 | 25.20872572 |
| UIJ64813.1 | 23S_rRNA_(adenine(2503)-C(2))-methyltransferase_RlmN [Bacillus_cereus] | CPTF_Co         | 223714.9    | 36128.92246 | 16.14953785 |
| UIJ64813.1 | 23S_rRNA_(adenine(2503)-C(2))-methyltransferase_RlmN [Bacillus_cereus] | CPTF_Cu         | 171775.4333 | 10682.2587  | 6.21873483  |
| UIJ64813.1 | 23S_rRNA_(adenine(2503)-C(2))-methyltransferase_RlmN [Bacillus_cereus] | CPTF_Fe         | 250885.8333 | 12685.84576 | 5.056421716 |
| UIJ64813.1 | 23S_rRNA_(adenine(2503)-C(2))-methyltransferase_RlmN [Bacillus_cereus] | CPTF_Mn         | 129974.4333 | 63985.45267 | 49.22926074 |
| UIJ64813.1 | 23S_rRNA_(adenine(2503)-C(2))-methyltransferase_RlmN [Bacillus_cereus] | CPTF_Ni         | 8439.6      | 14617.816   | 173.2050808 |
| UIJ64813.1 | 23S_rRNA_(adenine(2503)-C(2))-methyltransferase_RlmN [Bacillus_cereus] | CPTF_U          | 58275.23333 | 100935.665  | 173.2050808 |
| UIJ64813.1 | 23S_rRNA_(adenine(2503)-C(2))-methyltransferase_RlmN [Bacillus_cereus] | CPTF_metals_mix | 134098.7667 | 28176.16528 | 21.01150218 |
| UIJ64813.1 | 23S_rRNA_(adenine(2503)-C(2))-methyltransferase_RlmN [Bacillus_cereus] | CPTF_zcontrol   | 185272.9667 | 11552.3136  | 6.23529369  |
| UIJ64815.1 | methionyl-tRNA_formyltransferase [Bacillus_cereus]                     | CPTF_Al         | 0           | 0           | 0           |
| UIJ64815.1 | methionyl-tRNA_formyltransferase [Bacillus_cereus]                     | CPTF_Cd         | 0           | 0           | 0           |
| UIJ64815.1 | methionyl-tRNA_formyltransferase [Bacillus_cereus]                     | CPTF_Co         | 0           | 0           | 0           |
| UIJ64815.1 | methionyl-tRNA_formyltransferase [Bacillus_cereus]                     | CPTF_Cu         | 0           | 0           | 0           |
| UIJ64815.1 | methionyl-tRNA_formyltransferase [Bacillus_cereus]                     | CPTF_Fe         | 0           | 0           | 0           |
| UIJ64815.1 | methionyl-tRNA_formyltransferase [Bacillus_cereus]                     | CPTF_Mn         | 0           | 0           | 0           |
| UIJ64815.1 | methionyl-tRNA_formyltransferase [Bacillus_cereus]                     | CPTF_Ni         | 0           | 0           | 0           |
| UIJ64815.1 | methionyl-tRNA_formyltransferase [Bacillus_cereus]                     | CPTF_U          | 0           | 0           | 0           |
| UIJ64815.1 | methionyl-tRNA_formyltransferase [Bacillus_cereus]                     | CPTF_metals_mix | 514220.6    | 139313.8235 | 27.09222919 |
| UIJ64815.1 | methionyl-tRNA_formyltransferase [Bacillus_cereus]                     | CPTF_zcontrol   | 0           | 0           | 0           |
| UIJ64819.1 | DNA-directed_RNA_polymerase_subunit_omega [Bacillus_cereus]            | CPTF_Al         | 0           | 0           | 0           |
| UIJ64819.1 | DNA-directed_RNA_polymerase_subunit_omega [Bacillus_cereus]            | CPTF_Cd         | 274477      | 41939.58587 | 15.27981793 |
| UIJ64819.1 | DNA-directed_RNA_polymerase_subunit_omega [Bacillus_cereus]            | CPTF_Co         | 0           | 0           | 0           |
| UIJ64819.1 | DNA-directed_RNA_polymerase_subunit_omega [Bacillus_cereus]            | CPTF_Cu         | 0           | 0           | 0           |
| UIJ64819.1 | DNA-directed_RNA_polymerase_subunit_omega [Bacillus_cereus]            | CPTF_Fe         | 55113       | 95458.51616 | 173.2050808 |
| UIJ64819.1 | DNA-directed_RNA_polymerase_subunit_omega [Bacillus_cereus]            | CPTF_Mn         | 129310      | 223971.4899 | 173.2050808 |
| UIJ64819.1 | DNA-directed_RNA_polymerase_subunit_omega [Bacillus_cereus]            | CPTF_Ni         | 0           | 0           | 0           |
| UIJ64819.1 | DNA-directed_RNA_polymerase_subunit_omega [Bacillus_cereus]            | CPTF_U          | 0           | 0           | 0           |
| UIJ64819.1 | DNA-directed_RNA_polymerase_subunit_omega [Bacillus_cereus]            | CPTF_metals_mix | 825148.3333 | 48940.76507 | 5.931147539 |
| UIJ64819.1 | DNA-directed_RNA_polymerase_subunit_omega [Bacillus_cereus]            | CPTF_zcontrol   | 0           | 0           | 0           |
| UIJ64820.1 | guanylate_kinase [Bacillus_cereus]                                     | CPTF_Al         | 759177.6667 | 137248.6635 | 18.07859603 |
| UIJ64820.1 | guanylate_kinase [Bacillus_cereus]                                     | CPTF_Cd         | 701080.6667 | 88496.72622 | 12.6229021  |
| UIJ64820.1 | guanylate_kinase [Bacillus_cereus]                                     | CPTF_Co         | 822386.1667 | 97880.14237 | 11.90196848 |
| UIJ64820.1 | guanylate_kinase [Bacillus_cereus]                                     | CPTF_Cu         | 707451      | 106613.1118 | 15.07003478 |
| UIJ64820.1 | guanylate_kinase [Bacillus_cereus]                                     | CPTF_Fe         | 661395.3333 | 97570.36013 | 14.75219966 |
| UIJ64820.1 | guanylate_kinase [Bacillus_cereus]                                     | CPTF_Mn         | 752701.1333 | 174433.2662 | 23.1743063  |
| UIJ64820.1 | guanylate_kinase [Bacillus_cereus]                                     | CPTF_Ni         | 780569.5333 | 120578.3383 | 15.44748202 |
| UIJ64820.1 | guanylate_kinase [Bacillus_cereus]                                     | CPTF_U          | 706703.3333 | 64523.55381 | 9.130217839 |
| UIJ64820.1 | guanylate_kinase [Bacillus_cereus]                                     | CPTF_metals_mix | 412014.5333 | 78368.36858 | 19.02077772 |
| UIJ64820.1 | guanylate_kinase [Bacillus_cereus]                                     | CPTF_zcontrol   | 811299.0333 | 63762.64243 | 7.859326809 |
| UIJ64824.1 | NFACT_RNA_binding_domain-containing_protein [Bacillus_cereus]          | CPTF_Al         | 159015.3    | 244982.5448 | 154.0622473 |

|            |                                                                      |                 |             |             |             |
|------------|----------------------------------------------------------------------|-----------------|-------------|-------------|-------------|
| UIJ64824.1 | NFACT_RNA_binding_domain-containing_protein_[Bacillus_cereus]        | CPTF_Cd         | 133934.3    | 156484.6342 | 116.8368627 |
| UIJ64824.1 | NFACT_RNA_binding_domain-containing_protein_[Bacillus_cereus]        | CPTF_Co         | 57215.43333 | 72477.3325  | 126.6744448 |
| UIJ64824.1 | NFACT_RNA_binding_domain-containing_protein_[Bacillus_cereus]        | CPTF_Cu         | 66796.93333 | 67104.58717 | 100.4605808 |
| UIJ64824.1 | NFACT_RNA_binding_domain-containing_protein_[Bacillus_cereus]        | CPTF_Fe         | 175273.6667 | 303582.8959 | 173.2050808 |
| UIJ64824.1 | NFACT_RNA_binding_domain-containing_protein_[Bacillus_cereus]        | CPTF_Mn         | 12170.26667 | 21079.52021 | 173.2050808 |
| UIJ64824.1 | NFACT_RNA_binding_domain-containing_protein_[Bacillus_cereus]        | CPTF_Ni         | 0           | 0           | 0           |
| UIJ64824.1 | NFACT_RNA_binding_domain-containing_protein_[Bacillus_cereus]        | CPTF_U          | 633231.4333 | 274631.0923 | 43.36978202 |
| UIJ64824.1 | NFACT_RNA_binding_domain-containing_protein_[Bacillus_cereus]        | CPTF_metals_mix | 515663.2333 | 107669.694  | 20.87984697 |
| UIJ64824.1 | NFACT_RNA_binding_domain-containing_protein_[Bacillus_cereus]        | CPTF_zcontrol   | 198082.6667 | 343089.2428 | 173.2050808 |
| UIJ64826.1 | DinB_family_protein_[Bacillus_cereus]                                | CPTF_Al         | 42451.7     | 37141.26027 | 87.49063117 |
| UIJ64826.1 | DinB_family_protein_[Bacillus_cereus]                                | CPTF_Cd         | 44103.66667 | 3938.591203 | 8.930303307 |
| UIJ64826.1 | DinB_family_protein_[Bacillus_cereus]                                | CPTF_Co         | 35383.56667 | 32858.98568 | 92.86510315 |
| UIJ64826.1 | DinB_family_protein_[Bacillus_cereus]                                | CPTF_Cu         | 26290.46667 | 22905.45769 | 87.12457629 |
| UIJ64826.1 | DinB_family_protein_[Bacillus_cereus]                                | CPTF_Fe         | 37260.33333 | 42908.81152 | 115.1594945 |
| UIJ64826.1 | DinB_family_protein_[Bacillus_cereus]                                | CPTF_Mn         | 0           | 0           | 0           |
| UIJ64826.1 | DinB_family_protein_[Bacillus_cereus]                                | CPTF_Ni         | 0           | 0           | 0           |
| UIJ64826.1 | DinB_family_protein_[Bacillus_cereus]                                | CPTF_U          | 0           | 0           | 0           |
| UIJ64826.1 | DinB_family_protein_[Bacillus_cereus]                                | CPTF_metals_mix | 169691.1667 | 69292.19002 | 40.83429408 |
| UIJ64826.1 | DinB_family_protein_[Bacillus_cereus]                                | CPTF_zcontrol   | 0           | 0           | 0           |
| UIJ64828.1 | orotate_phosphoribosyltransferase_[Bacillus_cereus]                  | CPTF_Al         | 2028936.667 | 379466.9699 | 18.70275086 |
| UIJ64828.1 | orotate_phosphoribosyltransferase_[Bacillus_cereus]                  | CPTF_Cd         | 2029221     | 549008.7048 | 27.05514603 |
| UIJ64828.1 | orotate_phosphoribosyltransferase_[Bacillus_cereus]                  | CPTF_Co         | 1988486     | 541549.9093 | 27.23428324 |
| UIJ64828.1 | orotate_phosphoribosyltransferase_[Bacillus_cereus]                  | CPTF_Cu         | 2067062.667 | 429319.2867 | 20.76953416 |
| UIJ64828.1 | orotate_phosphoribosyltransferase_[Bacillus_cereus]                  | CPTF_Fe         | 1944768.333 | 189624.5964 | 9.750497946 |
| UIJ64828.1 | orotate_phosphoribosyltransferase_[Bacillus_cereus]                  | CPTF_Mn         | 1927747.667 | 330352.0358 | 17.13668451 |
| UIJ64828.1 | orotate_phosphoribosyltransferase_[Bacillus_cereus]                  | CPTF_Ni         | 2110568.333 | 268057.0876 | 12.70070641 |
| UIJ64828.1 | orotate_phosphoribosyltransferase_[Bacillus_cereus]                  | CPTF_U          | 2112867.333 | 419465.0207 | 19.85288021 |
| UIJ64828.1 | orotate_phosphoribosyltransferase_[Bacillus_cereus]                  | CPTF_metals_mix | 1698089.667 | 266381.5394 | 15.68713034 |
| UIJ64828.1 | orotate_phosphoribosyltransferase_[Bacillus_cereus]                  | CPTF_zcontrol   | 1756452.333 | 146102.3235 | 8.31803521  |
| UIJ64829.1 | orotidine-5'-phosphate_decarboxylase_[Bacillus_cereus]               | CPTF_Al         | 1272964.5   | 269470.1065 | 21.16870553 |
| UIJ64829.1 | orotidine-5'-phosphate_decarboxylase_[Bacillus_cereus]               | CPTF_Cd         | 1330100.133 | 151669.7185 | 11.40287973 |
| UIJ64829.1 | orotidine-5'-phosphate_decarboxylase_[Bacillus_cereus]               | CPTF_Co         | 1335130.6   | 216196.5133 | 16.19291126 |
| UIJ64829.1 | orotidine-5'-phosphate_decarboxylase_[Bacillus_cereus]               | CPTF_Cu         | 1443383.033 | 42275.47929 | 2.928916186 |
| UIJ64829.1 | orotidine-5'-phosphate_decarboxylase_[Bacillus_cereus]               | CPTF_Fe         | 1382784.333 | 78970.36949 | 5.710967906 |
| UIJ64829.1 | orotidine-5'-phosphate_decarboxylase_[Bacillus_cereus]               | CPTF_Mn         | 1236085.967 | 196932.3464 | 15.93192963 |
| UIJ64829.1 | orotidine-5'-phosphate_decarboxylase_[Bacillus_cereus]               | CPTF_Ni         | 1011592     | 78426.5727  | 7.752786963 |
| UIJ64829.1 | orotidine-5'-phosphate_decarboxylase_[Bacillus_cereus]               | CPTF_U          | 1016689.433 | 259756.874  | 25.54928433 |
| UIJ64829.1 | orotidine-5'-phosphate_decarboxylase_[Bacillus_cereus]               | CPTF_metals_mix | 1028806.133 | 53047.33362 | 5.156202921 |
| UIJ64829.1 | orotidine-5'-phosphate_decarboxylase_[Bacillus_cereus]               | CPTF_zcontrol   | 1388381.5   | 58093.46232 | 4.18425788  |
| UIJ64830.1 | dihydroorotate_oxidase_B_catalytic_subunit_[Bacillus_cereus]         | CPTF_Al         | 736045.6667 | 124492.6678 | 16.9137152  |
| UIJ64830.1 | dihydroorotate_oxidase_B_catalytic_subunit_[Bacillus_cereus]         | CPTF_Cd         | 725014      | 24103.98164 | 3.324622923 |
| UIJ64830.1 | dihydroorotate_oxidase_B_catalytic_subunit_[Bacillus_cereus]         | CPTF_Co         | 809415.3333 | 336248.8076 | 41.54218406 |
| UIJ64830.1 | dihydroorotate_oxidase_B_catalytic_subunit_[Bacillus_cereus]         | CPTF_Cu         | 687252.3667 | 231514.1626 | 33.68692111 |
| UIJ64830.1 | dihydroorotate_oxidase_B_catalytic_subunit_[Bacillus_cereus]         | CPTF_Fe         | 672274.3333 | 76421.37192 | 11.36758733 |
| UIJ64830.1 | dihydroorotate_oxidase_B_catalytic_subunit_[Bacillus_cereus]         | CPTF_Mn         | 462476.2667 | 233494.4845 | 50.48788474 |
| UIJ64830.1 | dihydroorotate_oxidase_B_catalytic_subunit_[Bacillus_cereus]         | CPTF_Ni         | 588855      | 148233.8706 | 25.173238   |
| UIJ64830.1 | dihydroorotate_oxidase_B_catalytic_subunit_[Bacillus_cereus]         | CPTF_U          | 496317.6667 | 87522.91994 | 17.63445588 |
| UIJ64830.1 | dihydroorotate_oxidase_B_catalytic_subunit_[Bacillus_cereus]         | CPTF_metals_mix | 559516.3333 | 92173.01994 | 16.47369602 |
| UIJ64830.1 | dihydroorotate_oxidase_B_catalytic_subunit_[Bacillus_cereus]         | CPTF_zcontrol   | 653555      | 141039.4441 | 21.58034811 |
| UIJ64831.1 | dihydroorotate_oxidase_B_electron_transfer_subunit_[Bacillus_cereus] | CPTF_Al         | 66779.66667 | 115665.7756 | 173.2050808 |
| UIJ64831.1 | dihydroorotate_oxidase_B_electron_transfer_subunit_[Bacillus_cereus] | CPTF_Cd         | 112046.6    | 30503.36556 | 27.22382076 |
| UIJ64831.1 | dihydroorotate_oxidase_B_electron_transfer_subunit_[Bacillus_cereus] | CPTF_Co         | 134659.6667 | 118283.0128 | 87.83848629 |
| UIJ64831.1 | dihydroorotate_oxidase_B_electron_transfer_subunit_[Bacillus_cereus] | CPTF_Cu         | 113078.3333 | 103568.4793 | 91.59002992 |
| UIJ64831.1 | dihydroorotate_oxidase_B_electron_transfer_subunit_[Bacillus_cereus] | CPTF_Fe         | 160760.3333 | 139233.8919 | 86.60960635 |
| UIJ64831.1 | dihydroorotate_oxidase_B_electron_transfer_subunit_[Bacillus_cereus] | CPTF_Mn         | 32980.56667 | 57124.01713 | 173.2050808 |
| UIJ64831.1 | dihydroorotate_oxidase_B_electron_transfer_subunit_[Bacillus_cereus] | CPTF_Ni         | 185501      | 53767.39505 | 28.98496237 |
| UIJ64831.1 | dihydroorotate_oxidase_B_electron_transfer_subunit_[Bacillus_cereus] | CPTF_U          | 99187.06667 | 120669.0368 | 121.6580355 |
| UIJ64831.1 | dihydroorotate_oxidase_B_electron_transfer_subunit_[Bacillus_cereus] | CPTF_metals_mix | 0           | 0           | 0           |
| UIJ64831.1 | dihydroorotate_oxidase_B_electron_transfer_subunit_[Bacillus_cereus] | CPTF_zcontrol   | 46098       | 79844.07813 | 173.2050808 |
| UIJ64832.1 | carbamoyl-phosphate_synthase_large_subunit_[Bacillus_cereus]         | CPTF_Al         | 5315128     | 471926.7076 | 8.878934009 |
| UIJ64832.1 | carbamoyl-phosphate_synthase_large_subunit_[Bacillus_cereus]         | CPTF_Cd         | 6236827.067 | 610316.3235 | 9.785686167 |

|            |                                                                                                                      |                 |             |             |             |
|------------|----------------------------------------------------------------------------------------------------------------------|-----------------|-------------|-------------|-------------|
| UIJ64832.1 | carbamoyl-phosphate_synthase_large_subunit_[ <i>Bacillus_cereus</i> ]                                                | CPTF_Co         | 5191094.933 | 1020913.786 | 19.66663678 |
| UIJ64832.1 | carbamoyl-phosphate_synthase_large_subunit_[ <i>Bacillus_cereus</i> ]                                                | CPTF_Cu         | 5823878.7   | 537422.7645 | 9.227918234 |
| UIJ64832.1 | carbamoyl-phosphate_synthase_large_subunit_[ <i>Bacillus_cereus</i> ]                                                | CPTF_Fe         | 5362665.5   | 221026.2675 | 4.121574756 |
| UIJ64832.1 | carbamoyl-phosphate_synthase_large_subunit_[ <i>Bacillus_cereus</i> ]                                                | CPTF_Mn         | 5367710.5   | 1047897.361 | 19.5224066  |
| UIJ64832.1 | carbamoyl-phosphate_synthase_large_subunit_[ <i>Bacillus_cereus</i> ]                                                | CPTF_Ni         | 4478675.8   | 519392.1237 | 11.59700204 |
| UIJ64832.1 | carbamoyl-phosphate_synthase_large_subunit_[ <i>Bacillus_cereus</i> ]                                                | CPTF_U          | 5064647.167 | 392783.7995 | 7.755403024 |
| UIJ64832.1 | carbamoyl-phosphate_synthase_large_subunit_[ <i>Bacillus_cereus</i> ]                                                | CPTF_metals_mix | 10218621.7  | 1228481.763 | 12.02199083 |
| UIJ64832.1 | carbamoyl-phosphate_synthase_large_subunit_[ <i>Bacillus_cereus</i> ]                                                | CPTF_zcontrol   | 5019167.933 | 632966.3625 | 12.61098196 |
| UIJ64833.1 | carbamoyl_phosphate_synthase_small_subunit_[ <i>Bacillus_cereus</i> ]                                                | CPTF_Al         | 6187521.133 | 48459.50775 | 0.783181289 |
| UIJ64833.1 | carbamoyl_phosphate_synthase_small_subunit_[ <i>Bacillus_cereus</i> ]                                                | CPTF_Cd         | 6030741.333 | 304330.44   | 5.046318904 |
| UIJ64833.1 | carbamoyl_phosphate_synthase_small_subunit_[ <i>Bacillus_cereus</i> ]                                                | CPTF_Co         | 5563649.033 | 533589.0028 | 9.590630171 |
| UIJ64833.1 | carbamoyl_phosphate_synthase_small_subunit_[ <i>Bacillus_cereus</i> ]                                                | CPTF_Cu         | 5892843.467 | 199861.424  | 3.391595672 |
| UIJ64833.1 | carbamoyl_phosphate_synthase_small_subunit_[ <i>Bacillus_cereus</i> ]                                                | CPTF_Fe         | 6168462     | 754571.4892 | 12.23273304 |
| UIJ64833.1 | carbamoyl_phosphate_synthase_small_subunit_[ <i>Bacillus_cereus</i> ]                                                | CPTF_Mn         | 6166298.933 | 516669.9831 | 8.376215041 |
| UIJ64833.1 | carbamoyl_phosphate_synthase_small_subunit_[ <i>Bacillus_cereus</i> ]                                                | CPTF_Ni         | 6257011.167 | 377254.0214 | 6.029300754 |
| UIJ64833.1 | carbamoyl_phosphate_synthase_small_subunit_[ <i>Bacillus_cereus</i> ]                                                | CPTF_U          | 7109972.4   | 696853.6025 | 9.801073243 |
| UIJ64833.1 | carbamoyl_phosphate_synthase_small_subunit_[ <i>Bacillus_cereus</i> ]                                                | CPTF_metals_mix | 4950460.067 | 83402.63975 | 1.684745228 |
| UIJ64833.1 | carbamoyl_phosphate_synthase_small_subunit_[ <i>Bacillus_cereus</i> ]                                                | CPTF_zcontrol   | 6612801.333 | 474473.9993 | 7.175083227 |
| UIJ64834.1 | dihydroorotase_[ <i>Bacillus_cereus</i> ]                                                                            | CPTF_Al         | 818817      | 146621.0202 | 17.90644554 |
| UIJ64834.1 | dihydroorotase_[ <i>Bacillus_cereus</i> ]                                                                            | CPTF_Cd         | 712665.3333 | 28124.22517 | 3.946343936 |
| UIJ64834.1 | dihydroorotase_[ <i>Bacillus_cereus</i> ]                                                                            | CPTF_Co         | 804382.0667 | 384635.9209 | 47.81756541 |
| UIJ64834.1 | dihydroorotase_[ <i>Bacillus_cereus</i> ]                                                                            | CPTF_Cu         | 806273.6667 | 307844.3233 | 38.18112087 |
| UIJ64834.1 | dihydroorotase_[ <i>Bacillus_cereus</i> ]                                                                            | CPTF_Fe         | 814432.6667 | 88453.81218 | 10.86078884 |
| UIJ64834.1 | dihydroorotase_[ <i>Bacillus_cereus</i> ]                                                                            | CPTF_Mn         | 521845.6667 | 101550.2925 | 19.45983248 |
| UIJ64834.1 | dihydroorotase_[ <i>Bacillus_cereus</i> ]                                                                            | CPTF_Ni         | 677271      | 206974.233  | 30.5600318  |
| UIJ64834.1 | dihydroorotase_[ <i>Bacillus_cereus</i> ]                                                                            | CPTF_U          | 731846.6667 | 285541.4947 | 39.01657378 |
| UIJ64834.1 | dihydroorotase_[ <i>Bacillus_cereus</i> ]                                                                            | CPTF_metals_mix | 1186692.6   | 365851.3267 | 30.82949423 |
| UIJ64834.1 | dihydroorotase_[ <i>Bacillus_cereus</i> ]                                                                            | CPTF_zcontrol   | 724478.3333 | 66041.57385 | 9.115741743 |
| UIJ64835.1 | aspartate_carbamoyltransferase_[ <i>Bacillus_cereus</i> ]                                                            | CPTF_Al         | 1052799.767 | 103869.5215 | 9.866028161 |
| UIJ64835.1 | aspartate_carbamoyltransferase_[ <i>Bacillus_cereus</i> ]                                                            | CPTF_Cd         | 1260024.533 | 125449.4303 | 9.95611014  |
| UIJ64835.1 | aspartate_carbamoyltransferase_[ <i>Bacillus_cereus</i> ]                                                            | CPTF_Co         | 1128460.567 | 131654.6305 | 11.66674622 |
| UIJ64835.1 | aspartate_carbamoyltransferase_[ <i>Bacillus_cereus</i> ]                                                            | CPTF_Cu         | 1144277.7   | 70011.53061 | 6.118403829 |
| UIJ64835.1 | aspartate_carbamoyltransferase_[ <i>Bacillus_cereus</i> ]                                                            | CPTF_Fe         | 1285470.933 | 75734.69095 | 5.891591088 |
| UIJ64835.1 | aspartate_carbamoyltransferase_[ <i>Bacillus_cereus</i> ]                                                            | CPTF_Mn         | 1003503.633 | 50193.87949 | 5.001863254 |
| UIJ64835.1 | aspartate_carbamoyltransferase_[ <i>Bacillus_cereus</i> ]                                                            | CPTF_Ni         | 1101181.2   | 269821.371  | 24.50290388 |
| UIJ64835.1 | aspartate_carbamoyltransferase_[ <i>Bacillus_cereus</i> ]                                                            | CPTF_U          | 1165947.567 | 164524.4327 | 14.11079172 |
| UIJ64835.1 | aspartate_carbamoyltransferase_[ <i>Bacillus_cereus</i> ]                                                            | CPTF_metals_mix | 455661.4    | 288255.5444 | 63.26090916 |
| UIJ64835.1 | aspartate_carbamoyltransferase_[ <i>Bacillus_cereus</i> ]                                                            | CPTF_zcontrol   | 1157651.233 | 134103.3638 | 11.58409026 |
| UIJ64837.1 | bifunctional_pyrimidine_operon_transcriptional_regulator/uracil_phosphoribosyltransferase_[ <i>Bacillus_cereus</i> ] | CPTF_Al         | 1197868.8   | 418512.1314 | 34.93806094 |
| UIJ64837.1 | bifunctional_pyrimidine_operon_transcriptional_regulator/uracil_phosphoribosyltransferase_[ <i>Bacillus_cereus</i> ] | CPTF_Cd         | 1473841.433 | 265071.0967 | 17.98504851 |
| UIJ64837.1 | bifunctional_pyrimidine_operon_transcriptional_regulator/uracil_phosphoribosyltransferase_[ <i>Bacillus_cereus</i> ] | CPTF_Co         | 1209402.2   | 198161.9729 | 16.38511762 |
| UIJ64837.1 | bifunctional_pyrimidine_operon_transcriptional_regulator/uracil_phosphoribosyltransferase_[ <i>Bacillus_cereus</i> ] | CPTF_Cu         | 1299690.467 | 346038.6948 | 26.62470055 |
| UIJ64837.1 | bifunctional_pyrimidine_operon_transcriptional_regulator/uracil_phosphoribosyltransferase_[ <i>Bacillus_cereus</i> ] | CPTF_Fe         | 1029095.133 | 238754.5113 | 23.20043148 |
| UIJ64837.1 | bifunctional_pyrimidine_operon_transcriptional_regulator/uracil_phosphoribosyltransferase_[ <i>Bacillus_cereus</i> ] | CPTF_Mn         | 1198555.8   | 425687.6684 | 35.51671674 |
| UIJ64837.1 | bifunctional_pyrimidine_operon_transcriptional_regulator/uracil_phosphoribosyltransferase_[ <i>Bacillus_cereus</i> ] | CPTF_Ni         | 949038.3333 | 224109.9342 | 23.61442382 |
| UIJ64837.1 | bifunctional_pyrimidine_operon_transcriptional_regulator/uracil_phosphoribosyltransferase_[ <i>Bacillus_cereus</i> ] | CPTF_U          | 1216494.8   | 279197.2239 | 22.95095909 |
| UIJ64837.1 | bifunctional_pyrimidine_operon_transcriptional_regulator/uracil_phosphoribosyltransferase_[ <i>Bacillus_cereus</i> ] | CPTF_metals_mix | 2754353.133 | 340817.1948 | 12.37376539 |
| UIJ64837.1 | bifunctional_pyrimidine_operon_transcriptional_regulator/uracil_phosphoribosyltransferase_[ <i>Bacillus_cereus</i> ] | CPTF_zcontrol   | 1442996.333 | 132030.5653 | 9.149750577 |
| UIJ64841.1 | isoleucine--tRNA_ligase_[ <i>Bacillus_cereus</i> ]                                                                   | CPTF_Al         | 4775857.333 | 180259.9502 | 3.774399812 |
| UIJ64841.1 | isoleucine--tRNA_ligase_[ <i>Bacillus_cereus</i> ]                                                                   | CPTF_Cd         | 5503162.6   | 876449.2719 | 15.9262834  |
| UIJ64841.1 | isoleucine--tRNA_ligase_[ <i>Bacillus_cereus</i> ]                                                                   | CPTF_Co         | 5321381.5   | 363482.7582 | 6.830608897 |
| UIJ64841.1 | isoleucine--tRNA_ligase_[ <i>Bacillus_cereus</i> ]                                                                   | CPTF_Cu         | 5768534.567 | 497131.3451 | 8.617983291 |
| UIJ64841.1 | isoleucine--tRNA_ligase_[ <i>Bacillus_cereus</i> ]                                                                   | CPTF_Fe         | 4628706.667 | 415704.2453 | 8.981002152 |
| UIJ64841.1 | isoleucine--tRNA_ligase_[ <i>Bacillus_cereus</i> ]                                                                   | CPTF_Mn         | 4645805.867 | 290634.1728 | 6.255839807 |
| UIJ64841.1 | isoleucine--tRNA_ligase_[ <i>Bacillus_cereus</i> ]                                                                   | CPTF_Ni         | 4827173.533 | 583906.6271 | 12.09624272 |
| UIJ64841.1 | isoleucine--tRNA_ligase_[ <i>Bacillus_cereus</i> ]                                                                   | CPTF_U          | 4001202.267 | 778911.0732 | 19.46692572 |
| UIJ64841.1 | isoleucine--tRNA_ligase_[ <i>Bacillus_cereus</i> ]                                                                   | CPTF_metals_mix | 6291215.267 | 472733.5329 | 7.514184666 |
| UIJ64841.1 | isoleucine--tRNA_ligase_[ <i>Bacillus_cereus</i> ]                                                                   | CPTF_zcontrol   | 4191451.9   | 270055.6639 | 6.443009973 |
| UIJ64842.1 | septum_site-determining_protein_DivIVA_[ <i>Bacillus_cereus</i> ]                                                    | CPTF_Al         | 3954242.467 | 122735.7804 | 3.103901227 |
| UIJ64842.1 | septum_site-determining_protein_DivIVA_[ <i>Bacillus_cereus</i> ]                                                    | CPTF_Cd         | 4203469.7   | 142736.9502 | 3.395693568 |
| UIJ64842.1 | septum_site-determining_protein_DivIVA_[ <i>Bacillus_cereus</i> ]                                                    | CPTF_Co         | 4074188.733 | 149980.0748 | 3.681225505 |



|            |                                                                    |                 |             |             |             |
|------------|--------------------------------------------------------------------|-----------------|-------------|-------------|-------------|
| UIJ64842.1 | septum_site-determining_protein_DivIVA [Bacillus cereus]           | CPTF_Cu         | 3853851.233 | 130434.513  | 3.384523822 |
| UIJ64842.1 | septum_site-determining_protein_DivIVA [Bacillus cereus]           | CPTF_Fe         | 3969082.967 | 385399.9901 | 9.710051247 |
| UIJ64842.1 | septum_site-determining_protein_DivIVA [Bacillus cereus]           | CPTF_Mn         | 4293759.667 | 286610.2488 | 6.675041712 |
| UIJ64842.1 | septum_site-determining_protein_DivIVA [Bacillus cereus]           | CPTF_Ni         | 32626.4135  | 162626.4135 | 4.981543719 |
| UIJ64842.1 | septum_site-determining_protein_DivIVA [Bacillus cereus]           | CPTF_U          | 3676457     | 1326831.547 | 36.08995147 |
| UIJ64842.1 | septum_site-determining_protein_DivIVA [Bacillus cereus]           | CPTF_metals_mix | 5738662.167 | 777066.4848 | 13.54089964 |
| UIJ64842.1 | septum_site-determining_protein_DivIVA [Bacillus cereus]           | CPTF_zcontrol   | 4166130.433 | 275055.3332 | 6.602177767 |
| UIJ64844.1 | YggT_family_protein [Bacillus cereus]                              | CPTF_Al         | 637390      | 63011.0392  | 9.885790364 |
| UIJ64844.1 | YggT_family_protein [Bacillus cereus]                              | CPTF_Cd         | 596343.6667 | 57627.70726 | 9.66350621  |
| UIJ64844.1 | YggT_family_protein [Bacillus cereus]                              | CPTF_Co         | 667175.3333 | 26112.70013 | 3.9139187   |
| UIJ64844.1 | YggT_family_protein [Bacillus cereus]                              | CPTF_Cu         | 672058      | 69131.92528 | 10.28660105 |
| UIJ64844.1 | YggT_family_protein [Bacillus cereus]                              | CPTF_Fe         | 658898.6667 | 100411.8047 | 15.23933949 |
| UIJ64844.1 | YggT_family_protein [Bacillus cereus]                              | CPTF_Mn         | 651369.3333 | 160284.353  | 24.60729187 |
| UIJ64844.1 | YggT_family_protein [Bacillus cereus]                              | CPTF_Ni         | 705312.6667 | 57416.24182 | 8.140537457 |
| UIJ64844.1 | YggT_family_protein [Bacillus cereus]                              | CPTF_U          | 730161.6667 | 74845.64397 | 10.25055784 |
| UIJ64844.1 | YggT_family_protein [Bacillus cereus]                              | CPTF_metals_mix | 368858.6667 | 30928.36532 | 8.384882372 |
| UIJ64844.1 | YggT_family_protein [Bacillus cereus]                              | CPTF_zcontrol   | 705058.3333 | 4473.740754 | 0.634520655 |
| UIJ64845.1 | cell_division_protein_SepF [Bacillus cereus]                       | CPTF_Al         | 150321.6667 | 15457.65378 | 10.28305109 |
| UIJ64845.1 | cell_division_protein_SepF [Bacillus cereus]                       | CPTF_Cd         | 91523       | 79435.28767 | 86.7927053  |
| UIJ64845.1 | cell_division_protein_SepF [Bacillus cereus]                       | CPTF_Co         | 213078.8    | 116031.9845 | 54.4549643  |
| UIJ64845.1 | cell_division_protein_SepF [Bacillus cereus]                       | CPTF_Cu         | 59024.66667 | 102233.7216 | 173.2050808 |
| UIJ64845.1 | cell_division_protein_SepF [Bacillus cereus]                       | CPTF_Fe         | 101283      | 88674.49413 | 87.55121208 |
| UIJ64845.1 | cell_division_protein_SepF [Bacillus cereus]                       | CPTF_Mn         | 65516       | 113477.0407 | 173.2050808 |
| UIJ64845.1 | cell_division_protein_SepF [Bacillus cereus]                       | CPTF_Ni         | 67719.33333 | 117293.326  | 173.2050808 |
| UIJ64845.1 | cell_division_protein_SepF [Bacillus cereus]                       | CPTF_U          | 33698.33333 | 58367.22546 | 173.2050808 |
| UIJ64845.1 | cell_division_protein_SepF [Bacillus cereus]                       | CPTF_metals_mix | 220626.6333 | 41842.46124 | 18.96528112 |
| UIJ64845.1 | cell_division_protein_SepF [Bacillus cereus]                       | CPTF_zcontrol   | 260366.7    | 46349.11208 | 17.80147464 |
| UIJ64846.1 | YggS_family_pyridoxal_phosphate-dependent_enzyme [Bacillus cereus] | CPTF_Al         | 334423.7667 | 188202.8491 | 56.27675657 |
| UIJ64846.1 | YggS_family_pyridoxal_phosphate-dependent_enzyme [Bacillus cereus] | CPTF_Cd         | 394592.6667 | 63022.865   | 15.97162601 |
| UIJ64846.1 | YggS_family_pyridoxal_phosphate-dependent_enzyme [Bacillus cereus] | CPTF_Co         | 512393.3    | 37923.22128 | 7.401193825 |
| UIJ64846.1 | YggS_family_pyridoxal_phosphate-dependent_enzyme [Bacillus cereus] | CPTF_Cu         | 455805.7    | 13818.72523 | 3.031714003 |
| UIJ64846.1 | YggS_family_pyridoxal_phosphate-dependent_enzyme [Bacillus cereus] | CPTF_Fe         | 318081.7333 | 197761.2117 | 62.17308038 |
| UIJ64846.1 | YggS_family_pyridoxal_phosphate-dependent_enzyme [Bacillus cereus] | CPTF_Mn         | 278473.2    | 231179.4717 | 83.01677565 |
| UIJ64846.1 | YggS_family_pyridoxal_phosphate-dependent_enzyme [Bacillus cereus] | CPTF_Ni         | 216977.5667 | 94691.73634 | 43.64125647 |
| UIJ64846.1 | YggS_family_pyridoxal_phosphate-dependent_enzyme [Bacillus cereus] | CPTF_U          | 211450.7667 | 229783.2814 | 108.6698739 |
| UIJ64846.1 | YggS_family_pyridoxal_phosphate-dependent_enzyme [Bacillus cereus] | CPTF_metals_mix | 823747.2667 | 60621.37661 | 7.359220365 |
| UIJ64846.1 | YggS_family_pyridoxal_phosphate-dependent_enzyme [Bacillus cereus] | CPTF_zcontrol   | 316505.1    | 215198.89   | 67.99223456 |
| UIJ64847.1 | peptidoglycan_editing_factor_PgeF [Bacillus cereus]                | CPTF_Al         | 619027      | 179678.3815 | 29.02593611 |
| UIJ64847.1 | peptidoglycan_editing_factor_PgeF [Bacillus cereus]                | CPTF_Cd         | 755393.6667 | 46833.96377 | 6.19994128  |
| UIJ64847.1 | peptidoglycan_editing_factor_PgeF [Bacillus cereus]                | CPTF_Co         | 744711.1667 | 136529.6445 | 18.3332345  |
| UIJ64847.1 | peptidoglycan_editing_factor_PgeF [Bacillus cereus]                | CPTF_Cu         | 828316.6667 | 22197.79571 | 2.679868292 |
| UIJ64847.1 | peptidoglycan_editing_factor_PgeF [Bacillus cereus]                | CPTF_Fe         | 542766      | 209573.1613 | 38.61206511 |
| UIJ64847.1 | peptidoglycan_editing_factor_PgeF [Bacillus cereus]                | CPTF_Mn         | 494029.3333 | 162596.2026 | 32.91225675 |
| UIJ64847.1 | peptidoglycan_editing_factor_PgeF [Bacillus cereus]                | CPTF_Ni         | 770869.3333 | 75446.19031 | 9.787156791 |
| UIJ64847.1 | peptidoglycan_editing_factor_PgeF [Bacillus cereus]                | CPTF_U          | 634662.3333 | 188334.877  | 29.67481558 |
| UIJ64847.1 | peptidoglycan_editing_factor_PgeF [Bacillus cereus]                | CPTF_metals_mix | 866822.9667 | 65855.81542 | 7.597377775 |
| UIJ64847.1 | peptidoglycan_editing_factor_PgeF [Bacillus cereus]                | CPTF_zcontrol   | 716701      | 37126.5094  | 5.180195004 |
| UIJ64852.1 | cell_division_protein_FtsZ [Bacillus cereus]                       | CPTF_Al         | 12321092.43 | 139933.9705 | 1.135726976 |
| UIJ64852.1 | cell_division_protein_FtsZ [Bacillus cereus]                       | CPTF_Cd         | 13635674.37 | 1504685.012 | 11.03491453 |
| UIJ64852.1 | cell_division_protein_FtsZ [Bacillus cereus]                       | CPTF_Co         | 12178427.9  | 96444.46492 | 0.791928693 |
| UIJ64852.1 | cell_division_protein_FtsZ [Bacillus cereus]                       | CPTF_Cu         | 12287759    | 1284232.518 | 10.45131597 |
| UIJ64852.1 | cell_division_protein_FtsZ [Bacillus cereus]                       | CPTF_Fe         | 12701357.87 | 1221227.228 | 9.614934406 |
| UIJ64852.1 | cell_division_protein_FtsZ [Bacillus cereus]                       | CPTF_Mn         | 12845000.13 | 1088697.441 | 8.475651461 |
| UIJ64852.1 | cell_division_protein_FtsZ [Bacillus cereus]                       | CPTF_Ni         | 13266264.67 | 1216152.436 | 9.167255945 |
| UIJ64852.1 | cell_division_protein_FtsZ [Bacillus cereus]                       | CPTF_U          | 12314575.5  | 999893.4079 | 8.11959298  |
| UIJ64852.1 | cell_division_protein_FtsZ [Bacillus cereus]                       | CPTF_metals_mix | 14301724.47 | 1223448.597 | 8.554552986 |
| UIJ64852.1 | cell_division_protein_FtsZ [Bacillus cereus]                       | CPTF_zcontrol   | 12838838.8  | 893685.1542 | 6.96079426  |
| UIJ64853.1 | cell_division_protein_FtsA [Bacillus cereus]                       | CPTF_Al         | 2765151.933 | 134756.6699 | 4.87339116  |
| UIJ64853.1 | cell_division_protein_FtsA [Bacillus cereus]                       | CPTF_Cd         | 2773678.067 | 28252.16093 | 1.018581113 |
| UIJ64853.1 | cell_division_protein_FtsA [Bacillus cereus]                       | CPTF_Co         | 2647844.167 | 111988.6141 | 4.22942617  |
| UIJ64853.1 | cell_division_protein_FtsA [Bacillus cereus]                       | CPTF_Cu         | 2537146.767 | 81947.33938 | 3.229901417 |

|            |                                                                                         |                 |             |             |             |
|------------|-----------------------------------------------------------------------------------------|-----------------|-------------|-------------|-------------|
| UIJ64853.1 | cell_division_protein_FtsA [Bacillus_cereus]                                            | CPTF_Fe         | 2561054.1   | 259562.2543 | 10.1349774  |
| UIJ64853.1 | cell_division_protein_FtsA [Bacillus_cereus]                                            | CPTF_Mn         | 2366264.5   | 460016.095  | 19.44060332 |
| UIJ64853.1 | cell_division_protein_FtsA [Bacillus_cereus]                                            | CPTF_Ni         | 2714052.933 | 149695.8939 | 5.515584903 |
| UIJ64853.1 | cell_division_protein_FtsA [Bacillus_cereus]                                            | CPTF_U          | 2896095     | 68866.75753 | 2.377917766 |
| UIJ64853.1 | cell_division_protein_FtsA [Bacillus_cereus]                                            | CPTF_metals_mix | 2746559.8   | 487287.4989 | 17.74174001 |
| UIJ64853.1 | cell_division_protein_FtsA [Bacillus_cereus]                                            | CPTF_zcontrol   | 2760321.867 | 65776.31893 | 2.382922069 |
| UIJ64859.1 | UDP-N-acetylmuramoyl-L-alanyl-D-glutamate--2,6-diaminopimelate_ligase [Bacillus_cereus] | CPTF_AI         | 214667.3333 | 30072.76569 | 14.00900883 |
| UIJ64859.1 | UDP-N-acetylmuramoyl-L-alanyl-D-glutamate--2,6-diaminopimelate_ligase [Bacillus_cereus] | CPTF_Cd         | 225276.6    | 7634.593105 | 3.388986297 |
| UIJ64859.1 | UDP-N-acetylmuramoyl-L-alanyl-D-glutamate--2,6-diaminopimelate_ligase [Bacillus_cereus] | CPTF_Co         | 221396.7    | 7080.165935 | 3.197954592 |
| UIJ64859.1 | UDP-N-acetylmuramoyl-L-alanyl-D-glutamate--2,6-diaminopimelate_ligase [Bacillus_cereus] | CPTF_Cu         | 208093.3333 | 34823.3223  | 16.73447282 |
| UIJ64859.1 | UDP-N-acetylmuramoyl-L-alanyl-D-glutamate--2,6-diaminopimelate_ligase [Bacillus_cereus] | CPTF_Fe         | 212972.3333 | 21544.68494 | 10.11618956 |
| UIJ64859.1 | UDP-N-acetylmuramoyl-L-alanyl-D-glutamate--2,6-diaminopimelate_ligase [Bacillus_cereus] | CPTF_Mn         | 218360.6667 | 36669.25416 | 16.79297591 |
| UIJ64859.1 | UDP-N-acetylmuramoyl-L-alanyl-D-glutamate--2,6-diaminopimelate_ligase [Bacillus_cereus] | CPTF_Ni         | 218644.6667 | 6221.989821 | 2.84570848  |
| UIJ64859.1 | UDP-N-acetylmuramoyl-L-alanyl-D-glutamate--2,6-diaminopimelate_ligase [Bacillus_cereus] | CPTF_U          | 240137      | 28594.42423 | 11.9075462  |
| UIJ64859.1 | UDP-N-acetylmuramoyl-L-alanyl-D-glutamate--2,6-diaminopimelate_ligase [Bacillus_cereus] | CPTF_metals_mix | 143901.6667 | 21111.62737 | 14.67087065 |
| UIJ64859.1 | UDP-N-acetylmuramoyl-L-alanyl-D-glutamate--2,6-diaminopimelate_ligase [Bacillus_cereus] | CPTF_zcontrol   | 222219.3333 | 16774.98901 | 7.54884319  |
| UIJ64863.1 | 16S_rRNA (cytosine(1402)-N(4))-methyltransferase_RsmH [Bacillus_cereus]                 | CPTF_AI         | 0           | 0           | 0           |
| UIJ64863.1 | 16S_rRNA (cytosine(1402)-N(4))-methyltransferase_RsmH [Bacillus_cereus]                 | CPTF_Cd         | 0           | 0           | 0           |
| UIJ64863.1 | 16S_rRNA (cytosine(1402)-N(4))-methyltransferase_RsmH [Bacillus_cereus]                 | CPTF_Co         | 0           | 0           | 0           |
| UIJ64863.1 | 16S_rRNA (cytosine(1402)-N(4))-methyltransferase_RsmH [Bacillus_cereus]                 | CPTF_Cu         | 103774.7667 | 90283.26098 | 86.99924257 |
| UIJ64863.1 | 16S_rRNA (cytosine(1402)-N(4))-methyltransferase_RsmH [Bacillus_cereus]                 | CPTF_Fe         | 71106       | 123159.2047 | 173.2050808 |
| UIJ64863.1 | 16S_rRNA (cytosine(1402)-N(4))-methyltransferase_RsmH [Bacillus_cereus]                 | CPTF_Mn         | 0           | 0           | 0           |
| UIJ64863.1 | 16S_rRNA (cytosine(1402)-N(4))-methyltransferase_RsmH [Bacillus_cereus]                 | CPTF_Ni         | 59585       | 103204.2474 | 173.2050808 |
| UIJ64863.1 | 16S_rRNA (cytosine(1402)-N(4))-methyltransferase_RsmH [Bacillus_cereus]                 | CPTF_U          | 0           | 0           | 0           |
| UIJ64863.1 | 16S_rRNA (cytosine(1402)-N(4))-methyltransferase_RsmH [Bacillus_cereus]                 | CPTF_metals_mix | 129890.7    | 37535.42382 | 28.89769924 |
| UIJ64863.1 | 16S_rRNA (cytosine(1402)-N(4))-methyltransferase_RsmH [Bacillus_cereus]                 | CPTF_zcontrol   | 33863.66667 | 58653.5912  | 173.2050808 |
| UIJ64864.1 | bacillithiol_biosynthesis_cysteine-adding_enzyme_BshC [Bacillus_cereus]                 | CPTF_AI         | 0           | 0           | 0           |
| UIJ64864.1 | bacillithiol_biosynthesis_cysteine-adding_enzyme_BshC [Bacillus_cereus]                 | CPTF_Cd         | 0           | 0           | 0           |
| UIJ64864.1 | bacillithiol_biosynthesis_cysteine-adding_enzyme_BshC [Bacillus_cereus]                 | CPTF_Co         | 0           | 0           | 0           |
| UIJ64864.1 | bacillithiol_biosynthesis_cysteine-adding_enzyme_BshC [Bacillus_cereus]                 | CPTF_Cu         | 17265.23333 | 29904.26134 | 173.2050808 |
| UIJ64864.1 | bacillithiol_biosynthesis_cysteine-adding_enzyme_BshC [Bacillus_cereus]                 | CPTF_Fe         | 0           | 0           | 0           |
| UIJ64864.1 | bacillithiol_biosynthesis_cysteine-adding_enzyme_BshC [Bacillus_cereus]                 | CPTF_Mn         | 0           | 0           | 0           |
| UIJ64864.1 | bacillithiol_biosynthesis_cysteine-adding_enzyme_BshC [Bacillus_cereus]                 | CPTF_Ni         | 0           | 0           | 0           |
| UIJ64864.1 | bacillithiol_biosynthesis_cysteine-adding_enzyme_BshC [Bacillus_cereus]                 | CPTF_U          | 0           | 0           | 0           |
| UIJ64864.1 | bacillithiol_biosynthesis_cysteine-adding_enzyme_BshC [Bacillus_cereus]                 | CPTF_metals_mix | 102175.8    | 53261.95325 | 52.1277575  |
| UIJ64864.1 | bacillithiol_biosynthesis_cysteine-adding_enzyme_BshC [Bacillus_cereus]                 | CPTF_zcontrol   | 0           | 0           | 0           |
| UIJ64865.1 | N-acetyltransferase [Bacillus_cereus]                                                   | CPTF_AI         | 19208.43333 | 33269.98247 | 173.2050808 |
| UIJ64865.1 | N-acetyltransferase [Bacillus_cereus]                                                   | CPTF_Cd         | 77451.96667 | 33095.05539 | 42.72978055 |
| UIJ64865.1 | N-acetyltransferase [Bacillus_cereus]                                                   | CPTF_Co         | 6897.733333 | 11947.22459 | 173.2050808 |
| UIJ64865.1 | N-acetyltransferase [Bacillus_cereus]                                                   | CPTF_Cu         | 9001        | 15590.18932 | 173.2050808 |
| UIJ64865.1 | N-acetyltransferase [Bacillus_cereus]                                                   | CPTF_Fe         | 212401.0333 | 153124.631  | 72.09222505 |
| UIJ64865.1 | N-acetyltransferase [Bacillus_cereus]                                                   | CPTF_Mn         | 30453.93333 | 52747.75982 | 173.2050808 |
| UIJ64865.1 | N-acetyltransferase [Bacillus_cereus]                                                   | CPTF_Ni         | 0           | 0           | 0           |
| UIJ64865.1 | N-acetyltransferase [Bacillus_cereus]                                                   | CPTF_U          | 69748.33333 | 120807.6571 | 173.2050808 |
| UIJ64865.1 | N-acetyltransferase [Bacillus_cereus]                                                   | CPTF_metals_mix | 0           | 0           | 0           |
| UIJ64865.1 | N-acetyltransferase [Bacillus_cereus]                                                   | CPTF_zcontrol   | 92775.66667 | 160692.1684 | 173.2050808 |
| UIJ64867.1 | 50S_ribosomal_protein_L32 [Bacillus_cereus]                                             | CPTF_AI         | 487280.6667 | 154292.1626 | 31.66392043 |
| UIJ64867.1 | 50S_ribosomal_protein_L32 [Bacillus_cereus]                                             | CPTF_Cd         | 113625.6667 | 196805.4277 | 173.2050808 |
| UIJ64867.1 | 50S_ribosomal_protein_L32 [Bacillus_cereus]                                             | CPTF_Co         | 320973.3333 | 278141.4062 | 86.65561194 |
| UIJ64867.1 | 50S_ribosomal_protein_L32 [Bacillus_cereus]                                             | CPTF_Cu         | 296977.3333 | 257253.0485 | 86.62379908 |
| UIJ64867.1 | 50S_ribosomal_protein_L32 [Bacillus_cereus]                                             | CPTF_Fe         | 278180      | 251917.7527 | 90.55926114 |
| UIJ64867.1 | 50S_ribosomal_protein_L32 [Bacillus_cereus]                                             | CPTF_Mn         | 435235.6667 | 69144.52971 | 15.88668738 |
| UIJ64867.1 | 50S_ribosomal_protein_L32 [Bacillus_cereus]                                             | CPTF_Ni         | 151628.3333 | 262627.9772 | 173.2050808 |
| UIJ64867.1 | 50S_ribosomal_protein_L32 [Bacillus_cereus]                                             | CPTF_U          | 232269.3333 | 402302.2864 | 173.2050808 |
| UIJ64867.1 | 50S_ribosomal_protein_L32 [Bacillus_cereus]                                             | CPTF_metals_mix | 555768.3333 | 145972.7115 | 26.26502857 |
| UIJ64867.1 | 50S_ribosomal_protein_L32 [Bacillus_cereus]                                             | CPTF_zcontrol   | 183365.6667 | 317598.651  | 173.2050808 |
| UIJ64868.1 | DUF177_domain-containing_protein [Bacillus_cereus]                                      | CPTF_AI         | 82464.43333 | 4384.390266 | 5.316704534 |
| UIJ64868.1 | DUF177_domain-containing_protein [Bacillus_cereus]                                      | CPTF_Cd         | 36513.66667 | 63243.52584 | 173.2050808 |
| UIJ64868.1 | DUF177_domain-containing_protein [Bacillus_cereus]                                      | CPTF_Co         | 75412.13333 | 37028.51196 | 49.10153091 |
| UIJ64868.1 | DUF177_domain-containing_protein [Bacillus_cereus]                                      | CPTF_Cu         | 83171.36667 | 76525.96745 | 92.00999156 |
| UIJ64868.1 | DUF177_domain-containing_protein [Bacillus_cereus]                                      | CPTF_Fe         | 56276.46667 | 48834.9161  | 86.77679853 |

|            |                                                             |                 |             |             |             |
|------------|-------------------------------------------------------------|-----------------|-------------|-------------|-------------|
| UIJ64868.1 | DUF177_domain-containing_protein_[Bacillus_cereus]          | CPTF_Mn         | 0           | 0           | 0           |
| UIJ64868.1 | DUF177_domain-containing_protein_[Bacillus_cereus]          | CPTF_Ni         | 27428.63333 | 47507.78652 | 173.2050808 |
| UIJ64868.1 | DUF177_domain-containing_protein_[Bacillus_cereus]          | CPTF_U          | 0           | 0           | 0           |
| UIJ64868.1 | DUF177_domain-containing_protein_[Bacillus_cereus]          | CPTF_metals_mix | 209028      | 19506.9554  | 9.33221234  |
| UIJ64868.1 | DUF177_domain-containing_protein_[Bacillus_cereus]          | CPTF_zcontrol   | 0           | 0           | 0           |
| UIJ64870.1 | PDZ_domain-containing_protein_[Bacillus_cereus]             | CPTF_Al         | 85874.66667 | 78027.70727 | 90.86231167 |
| UIJ64870.1 | PDZ_domain-containing_protein_[Bacillus_cereus]             | CPTF_Cd         | 17141.76667 | 29690.4108  | 173.2050808 |
| UIJ64870.1 | PDZ_domain-containing_protein_[Bacillus_cereus]             | CPTF_Co         | 0           | 0           | 0           |
| UIJ64870.1 | PDZ_domain-containing_protein_[Bacillus_cereus]             | CPTF_Cu         | 0           | 0           | 0           |
| UIJ64870.1 | PDZ_domain-containing_protein_[Bacillus_cereus]             | CPTF_Fe         | 21056.7     | 36471.27424 | 173.2050808 |
| UIJ64870.1 | PDZ_domain-containing_protein_[Bacillus_cereus]             | CPTF_Mn         | 32902.3     | 56988.45529 | 173.2050808 |
| UIJ64870.1 | PDZ_domain-containing_protein_[Bacillus_cereus]             | CPTF_Ni         | 0           | 0           | 0           |
| UIJ64870.1 | PDZ_domain-containing_protein_[Bacillus_cereus]             | CPTF_U          | 0           | 0           | 0           |
| UIJ64870.1 | PDZ_domain-containing_protein_[Bacillus_cereus]             | CPTF_metals_mix | 87452.66667 | 80073.52057 | 91.56212569 |
| UIJ64870.1 | PDZ_domain-containing_protein_[Bacillus_cereus]             | CPTF_zcontrol   | 0           | 0           | 0           |
| UIJ64873.1 | pantetheine-phosphate_adenylyltransferase_[Bacillus_cereus] | CPTF_Al         | 847074.6667 | 40680.15685 | 4.802428694 |
| UIJ64873.1 | pantetheine-phosphate_adenylyltransferase_[Bacillus_cereus] | CPTF_Cd         | 979026.3333 | 76534.12165 | 7.8173711   |
| UIJ64873.1 | pantetheine-phosphate_adenylyltransferase_[Bacillus_cereus] | CPTF_Co         | 1040308     | 131367.6719 | 12.62776716 |
| UIJ64873.1 | pantetheine-phosphate_adenylyltransferase_[Bacillus_cereus] | CPTF_Cu         | 947842.6667 | 65685.81784 | 6.930033871 |
| UIJ64873.1 | pantetheine-phosphate_adenylyltransferase_[Bacillus_cereus] | CPTF_Fe         | 960581      | 103401.4153 | 10.76446601 |
| UIJ64873.1 | pantetheine-phosphate_adenylyltransferase_[Bacillus_cereus] | CPTF_Mn         | 863435.6667 | 240308.5353 | 27.83166651 |
| UIJ64873.1 | pantetheine-phosphate_adenylyltransferase_[Bacillus_cereus] | CPTF_Ni         | 1076986.267 | 179171.9949 | 16.63642337 |
| UIJ64873.1 | pantetheine-phosphate_adenylyltransferase_[Bacillus_cereus] | CPTF_U          | 1152712.667 | 56599.07845 | 4.910076907 |
| UIJ64873.1 | pantetheine-phosphate_adenylyltransferase_[Bacillus_cereus] | CPTF_metals_mix | 788741.3333 | 63138.89074 | 8.005018639 |
| UIJ64873.1 | pantetheine-phosphate_adenylyltransferase_[Bacillus_cereus] | CPTF_zcontrol   | 911106.3333 | 225257.0352 | 24.72346278 |
| UIJ64875.1 | methylthioribose_kinase_[Bacillus_cereus]                   | CPTF_Al         | 50882.1     | 67895.95934 | 133.4378089 |
| UIJ64875.1 | methylthioribose_kinase_[Bacillus_cereus]                   | CPTF_Cd         | 81126.7     | 79449.30085 | 97.93237103 |
| UIJ64875.1 | methylthioribose_kinase_[Bacillus_cereus]                   | CPTF_Co         | 46257.36667 | 61776.16836 | 133.5488222 |
| UIJ64875.1 | methylthioribose_kinase_[Bacillus_cereus]                   | CPTF_Cu         | 136339.3667 | 91133.14792 | 66.84287169 |
| UIJ64875.1 | methylthioribose_kinase_[Bacillus_cereus]                   | CPTF_Fe         | 51559.4     | 51054.22961 | 99.02021671 |
| UIJ64875.1 | methylthioribose_kinase_[Bacillus_cereus]                   | CPTF_Mn         | 89746.66667 | 80656.2028  | 89.87097325 |
| UIJ64875.1 | methylthioribose_kinase_[Bacillus_cereus]                   | CPTF_Ni         | 98378.3     | 86736.6691  | 88.16646466 |
| UIJ64875.1 | methylthioribose_kinase_[Bacillus_cereus]                   | CPTF_U          | 32800.06667 | 56811.38196 | 173.2050808 |
| UIJ64875.1 | methylthioribose_kinase_[Bacillus_cereus]                   | CPTF_metals_mix | 153605.9    | 113522.554  | 73.90507394 |
| UIJ64875.1 | methylthioribose_kinase_[Bacillus_cereus]                   | CPTF_zcontrol   | 37074.33333 | 64214.62899 | 173.2050808 |
| UIJ64881.1 | YugN-like_family_protein_[Bacillus_cereus]                  | CPTF_Al         | 215950.7    | 156221.3922 | 72.34122983 |
| UIJ64881.1 | YugN-like_family_protein_[Bacillus_cereus]                  | CPTF_Cd         | 159698.3333 | 140974.4828 | 88.27548781 |
| UIJ64881.1 | YugN-like_family_protein_[Bacillus_cereus]                  | CPTF_Co         | 254835.1333 | 222407.1679 | 87.27492359 |
| UIJ64881.1 | YugN-like_family_protein_[Bacillus_cereus]                  | CPTF_Cu         | 157789      | 140948.2812 | 89.32706409 |
| UIJ64881.1 | YugN-like_family_protein_[Bacillus_cereus]                  | CPTF_Fe         | 113674.7    | 196890.3559 | 173.2050808 |
| UIJ64881.1 | YugN-like_family_protein_[Bacillus_cereus]                  | CPTF_Mn         | 246333      | 261532.1742 | 106.1701738 |
| UIJ64881.1 | YugN-like_family_protein_[Bacillus_cereus]                  | CPTF_Ni         | 183804      | 160276.7399 | 87.19981059 |
| UIJ64881.1 | YugN-like_family_protein_[Bacillus_cereus]                  | CPTF_U          | 0           | 0           | 0           |
| UIJ64881.1 | YugN-like_family_protein_[Bacillus_cereus]                  | CPTF_metals_mix | 792876.6667 | 101689.8784 | 12.82543461 |
| UIJ64881.1 | YugN-like_family_protein_[Bacillus_cereus]                  | CPTF_zcontrol   | 10919.66667 | 18913.41747 | 173.2050808 |
| UIJ64882.1 | formamidase_[Bacillus_cereus]                               | CPTF_Al         | 167435.4    | 135040.8647 | 80.65251713 |
| UIJ64882.1 | formamidase_[Bacillus_cereus]                               | CPTF_Cd         | 296589.1    | 179692.4918 | 60.58634382 |
| UIJ64882.1 | formamidase_[Bacillus_cereus]                               | CPTF_Co         | 208862.7667 | 55892.0436  | 26.76017583 |
| UIJ64882.1 | formamidase_[Bacillus_cereus]                               | CPTF_Cu         | 159375.3    | 108334.2372 | 67.97429541 |
| UIJ64882.1 | formamidase_[Bacillus_cereus]                               | CPTF_Fe         | 193390.2333 | 13947.47294 | 7.212087551 |
| UIJ64882.1 | formamidase_[Bacillus_cereus]                               | CPTF_Mn         | 215884.7333 | 30086.55385 | 13.93639716 |
| UIJ64882.1 | formamidase_[Bacillus_cereus]                               | CPTF_Ni         | 114035.3    | 104281.1925 | 91.44641392 |
| UIJ64882.1 | formamidase_[Bacillus_cereus]                               | CPTF_U          | 101902.1667 | 138789.9012 | 136.199166  |
| UIJ64882.1 | formamidase_[Bacillus_cereus]                               | CPTF_metals_mix | 351914.9    | 63794.10627 | 18.12770822 |
| UIJ64882.1 | formamidase_[Bacillus_cereus]                               | CPTF_zcontrol   | 104862.9333 | 126757.7158 | 120.8794297 |
| UIJ64890.1 | pyruvate_carboxylase_[Bacillus_cereus]                      | CPTF_Al         | 8602699.7   | 439706.7449 | 5.111264605 |
| UIJ64890.1 | pyruvate_carboxylase_[Bacillus_cereus]                      | CPTF_Cd         | 10154783.83 | 960779.4678 | 9.461348302 |
| UIJ64890.1 | pyruvate_carboxylase_[Bacillus_cereus]                      | CPTF_Co         | 8319890.4   | 1299514.698 | 15.6193728  |
| UIJ64890.1 | pyruvate_carboxylase_[Bacillus_cereus]                      | CPTF_Cu         | 9775350.167 | 496610.6867 | 5.080234244 |
| UIJ64890.1 | pyruvate_carboxylase_[Bacillus_cereus]                      | CPTF_Fe         | 8419561     | 1336355.089 | 15.87202811 |
| UIJ64890.1 | pyruvate_carboxylase_[Bacillus_cereus]                      | CPTF_Mn         | 8305753.5   | 848285.7756 | 10.21323081 |

|            |                                                                    |                 |             |             |             |
|------------|--------------------------------------------------------------------|-----------------|-------------|-------------|-------------|
| UIJ64890.1 | pyruvate_carboxylase [Bacillus_cereus]                             | CPTF_Ni         | 7028979.267 | 1910157.742 | 27.17546417 |
| UIJ64890.1 | pyruvate_carboxylase [Bacillus_cereus]                             | CPTF_U          | 7694832     | 359862.7389 | 4.676680907 |
| UIJ64890.1 | pyruvate_carboxylase [Bacillus_cereus]                             | CPTF_metals_mix | 17325812.57 | 1075077.68  | 6.205063549 |
| UIJ64890.1 | pyruvate_carboxylase [Bacillus_cereus]                             | CPTF_zcontrol   | 8002208.5   | 49657.82149 | 0.620551458 |
| UIJ64892.1 | YlaN_family_protein [Bacillus_cereus]                              | CPTF_Al         | 725852      | 103008.0458 | 14.19132907 |
| UIJ64892.1 | YlaN_family_protein [Bacillus_cereus]                              | CPTF_Cd         | 736215.4    | 116669.3266 | 15.8471728  |
| UIJ64892.1 | YlaN_family_protein [Bacillus_cereus]                              | CPTF_Co         | 294704.3333 | 335715.5623 | 113.916059  |
| UIJ64892.1 | YlaN_family_protein [Bacillus_cereus]                              | CPTF_Cu         | 229483      | 397476.2155 | 173.2050808 |
| UIJ64892.1 | YlaN_family_protein [Bacillus_cereus]                              | CPTF_Fe         | 335303      | 419243.0316 | 125.0340831 |
| UIJ64892.1 | YlaN_family_protein [Bacillus_cereus]                              | CPTF_Mn         | 595491.3333 | 544314.5733 | 91.40596056 |
| UIJ64892.1 | YlaN_family_protein [Bacillus_cereus]                              | CPTF_Ni         | 477847      | 413912.2067 | 86.62023759 |
| UIJ64892.1 | YlaN_family_protein [Bacillus_cereus]                              | CPTF_U          | 295226.3333 | 511347.0091 | 173.2050808 |
| UIJ64892.1 | YlaN_family_protein [Bacillus_cereus]                              | CPTF_metals_mix | 2157207.167 | 425291.31   | 19.71490344 |
| UIJ64892.1 | YlaN_family_protein [Bacillus_cereus]                              | CPTF_zcontrol   | 430269.3333 | 372669.2475 | 86.61301622 |
| UIJ64893.1 | peptidyl-prolyl_cis-trans_isomerase [Bacillus_cereus]              | CPTF_Al         | 131839.4    | 37631.34779 | 28.54332452 |
| UIJ64893.1 | peptidyl-prolyl_cis-trans_isomerase [Bacillus_cereus]              | CPTF_Cd         | 85125       | 69462.45839 | 81.60053849 |
| UIJ64893.1 | peptidyl-prolyl_cis-trans_isomerase [Bacillus_cereus]              | CPTF_Co         | 93748.9     | 38534.09772 | 41.10351985 |
| UIJ64893.1 | peptidyl-prolyl_cis-trans_isomerase [Bacillus_cereus]              | CPTF_Cu         | 81305.86667 | 60962.98991 | 74.97981684 |
| UIJ64893.1 | peptidyl-prolyl_cis-trans_isomerase [Bacillus_cereus]              | CPTF_Fe         | 86148.6     | 16914.99058 | 19.63466682 |
| UIJ64893.1 | peptidyl-prolyl_cis-trans_isomerase [Bacillus_cereus]              | CPTF_Mn         | 34451.66667 | 59672.03707 | 173.2050808 |
| UIJ64893.1 | peptidyl-prolyl_cis-trans_isomerase [Bacillus_cereus]              | CPTF_Ni         | 8636.66667  | 14959.14547 | 173.2050808 |
| UIJ64893.1 | peptidyl-prolyl_cis-trans_isomerase [Bacillus_cereus]              | CPTF_U          | 0           | 0           | 0           |
| UIJ64893.1 | peptidyl-prolyl_cis-trans_isomerase [Bacillus_cereus]              | CPTF_metals_mix | 270570.7667 | 206665.1055 | 76.38116567 |
| UIJ64893.1 | peptidyl-prolyl_cis-trans_isomerase [Bacillus_cereus]              | CPTF_zcontrol   | 8232.5      | 14259.10827 | 173.2050808 |
| UIJ64894.1 | PhoH_family_protein [Bacillus_cereus]                              | CPTF_Al         | 69800.6     | 77938.61552 | 111.6589478 |
| UIJ64894.1 | PhoH_family_protein [Bacillus_cereus]                              | CPTF_Cd         | 15245.46667 | 26405.92285 | 173.2050808 |
| UIJ64894.1 | PhoH_family_protein [Bacillus_cereus]                              | CPTF_Co         | 80810.76667 | 76135.64457 | 94.21472869 |
| UIJ64894.1 | PhoH_family_protein [Bacillus_cereus]                              | CPTF_Cu         | 111765.4    | 102822.67   | 91.99865974 |
| UIJ64894.1 | PhoH_family_protein [Bacillus_cereus]                              | CPTF_Fe         | 53339.9     | 92387.41687 | 173.2050808 |
| UIJ64894.1 | PhoH_family_protein [Bacillus_cereus]                              | CPTF_Mn         | 46507.63333 | 45744.18823 | 98.35845205 |
| UIJ64894.1 | PhoH_family_protein [Bacillus_cereus]                              | CPTF_Ni         | 80047.73333 | 38751.77252 | 48.41083052 |
| UIJ64894.1 | PhoH_family_protein [Bacillus_cereus]                              | CPTF_U          | 17055.96667 | 29541.80084 | 173.2050808 |
| UIJ64894.1 | PhoH_family_protein [Bacillus_cereus]                              | CPTF_metals_mix | 65479.8     | 50778.63965 | 77.54855643 |
| UIJ64894.1 | PhoH_family_protein [Bacillus_cereus]                              | CPTF_zcontrol   | 34023.53333 | 58930.48839 | 173.2050808 |
| UIJ64895.1 | pyridoxamine_5'-phosphate_oxidase_family_protein [Bacillus_cereus] | CPTF_Al         | 156437.5667 | 138268.0489 | 88.38545101 |
| UIJ64895.1 | pyridoxamine_5'-phosphate_oxidase_family_protein [Bacillus_cereus] | CPTF_Cd         | 254926.6667 | 182432.7146 | 71.56282119 |
| UIJ64895.1 | pyridoxamine_5'-phosphate_oxidase_family_protein [Bacillus_cereus] | CPTF_Co         | 0           | 0           | 0           |
| UIJ64895.1 | pyridoxamine_5'-phosphate_oxidase_family_protein [Bacillus_cereus] | CPTF_Cu         | 14918.46667 | 25839.54224 | 173.2050808 |
| UIJ64895.1 | pyridoxamine_5'-phosphate_oxidase_family_protein [Bacillus_cereus] | CPTF_Fe         | 73163.06667 | 107901.5483 | 147.4808988 |
| UIJ64895.1 | pyridoxamine_5'-phosphate_oxidase_family_protein [Bacillus_cereus] | CPTF_Mn         | 82001.26667 | 127418.7875 | 155.3863649 |
| UIJ64895.1 | pyridoxamine_5'-phosphate_oxidase_family_protein [Bacillus_cereus] | CPTF_Ni         | 0           | 0           | 0           |
| UIJ64895.1 | pyridoxamine_5'-phosphate_oxidase_family_protein [Bacillus_cereus] | CPTF_U          | 9047.933333 | 15671.48024 | 173.2050808 |
| UIJ64895.1 | pyridoxamine_5'-phosphate_oxidase_family_protein [Bacillus_cereus] | CPTF_metals_mix | 356556.8333 | 334764.5904 | 93.88814323 |
| UIJ64895.1 | pyridoxamine_5'-phosphate_oxidase_family_protein [Bacillus_cereus] | CPTF_zcontrol   | 0           | 0           | 0           |
| UIJ64899.1 | translational_GTPase_TypA [Bacillus_cereus]                        | CPTF_Al         | 2299978.333 | 84726.65983 | 3.683802521 |
| UIJ64899.1 | translational_GTPase_TypA [Bacillus_cereus]                        | CPTF_Cd         | 2551840.167 | 90414.76472 | 3.543120212 |
| UIJ64899.1 | translational_GTPase_TypA [Bacillus_cereus]                        | CPTF_Co         | 2575244.633 | 105237.4485 | 4.086502973 |
| UIJ64899.1 | translational_GTPase_TypA [Bacillus_cereus]                        | CPTF_Cu         | 2642971.3   | 200838.3078 | 7.598959089 |
| UIJ64899.1 | translational_GTPase_TypA [Bacillus_cereus]                        | CPTF_Fe         | 2236023.067 | 105212.5015 | 4.705340616 |
| UIJ64899.1 | translational_GTPase_TypA [Bacillus_cereus]                        | CPTF_Mn         | 2452489.867 | 356004.1159 | 14.51602801 |
| UIJ64899.1 | translational_GTPase_TypA [Bacillus_cereus]                        | CPTF_Ni         | 2189997.8   | 295486.9285 | 13.49256737 |
| UIJ64899.1 | translational_GTPase_TypA [Bacillus_cereus]                        | CPTF_U          | 2070462.4   | 159007.9518 | 7.679828032 |
| UIJ64899.1 | translational_GTPase_TypA [Bacillus_cereus]                        | CPTF_metals_mix | 4154082.033 | 648709.0114 | 15.61618202 |
| UIJ64899.1 | translational_GTPase_TypA [Bacillus_cereus]                        | CPTF_zcontrol   | 2204036.667 | 276270.3106 | 12.53474204 |
| UIJ64901.1 | inositol_monophosphatase_family_protein [Bacillus_cereus]          | CPTF_Al         | 12077.43333 | 20918.72816 | 173.2050808 |
| UIJ64901.1 | inositol_monophosphatase_family_protein [Bacillus_cereus]          | CPTF_Cd         | 31917.5     | 27641.40587 | 86.60266584 |
| UIJ64901.1 | inositol_monophosphatase_family_protein [Bacillus_cereus]          | CPTF_Co         | 35317.96667 | 33707.6334  | 95.44047005 |
| UIJ64901.1 | inositol_monophosphatase_family_protein [Bacillus_cereus]          | CPTF_Cu         | 19098.2     | 33079.05273 | 173.2050808 |
| UIJ64901.1 | inositol_monophosphatase_family_protein [Bacillus_cereus]          | CPTF_Fe         | 40201.46667 | 15046.82969 | 37.42855904 |
| UIJ64901.1 | inositol_monophosphatase_family_protein [Bacillus_cereus]          | CPTF_Mn         | 0           | 0           | 0           |
| UIJ64901.1 | inositol_monophosphatase_family_protein [Bacillus_cereus]          | CPTF_Ni         | 35133.53333 | 30531.62853 | 86.90167379 |

|            |                                                                                                |                 |             |             |             |
|------------|------------------------------------------------------------------------------------------------|-----------------|-------------|-------------|-------------|
| UIJ64901.1 | inositol_monophosphatase_family_protein_[Bacillus_cereus]                                      | CPTF_U          | 0           | 0           | 0           |
| UIJ64901.1 | inositol_monophosphatase_family_protein_[Bacillus_cereus]                                      | CPTF_metals_mix | 0           | 0           | 0           |
| UIJ64901.1 | inositol_monophosphatase_family_protein_[Bacillus_cereus]                                      | CPTF_zcontrol   | 11124.3     | 19267.8528  | 173.2050808 |
| UIJ64905.1 | arginine_decarboxylase_[Bacillus_cereus]                                                       | CPTF_AI         | 128000.4667 | 48101.40477 | 37.57908547 |
| UIJ64905.1 | arginine_decarboxylase_[Bacillus_cereus]                                                       | CPTF_Cd         | 66368.36667 | 57712.1097  | 86.95725479 |
| UIJ64905.1 | arginine_decarboxylase_[Bacillus_cereus]                                                       | CPTF_Co         | 155770.5    | 136068.5358 | 87.35192852 |
| UIJ64905.1 | arginine_decarboxylase_[Bacillus_cereus]                                                       | CPTF_Cu         | 175665.6333 | 69216.92785 | 39.4026575  |
| UIJ64905.1 | arginine_decarboxylase_[Bacillus_cereus]                                                       | CPTF_Fe         | 144380.7    | 47662.33113 | 33.01156673 |
| UIJ64905.1 | arginine_decarboxylase_[Bacillus_cereus]                                                       | CPTF_Mn         | 155423.5667 | 134619.5672 | 86.61464289 |
| UIJ64905.1 | arginine_decarboxylase_[Bacillus_cereus]                                                       | CPTF_Ni         | 64340.26667 | 111440.6108 | 173.2050808 |
| UIJ64905.1 | arginine_decarboxylase_[Bacillus_cereus]                                                       | CPTF_U          | 193920.9    | 37475.50071 | 19.32514789 |
| UIJ64905.1 | arginine_decarboxylase_[Bacillus_cereus]                                                       | CPTF_metals_mix | 182058.1333 | 83922.76049 | 46.09668294 |
| UIJ64905.1 | arginine_decarboxylase_[Bacillus_cereus]                                                       | CPTF_zcontrol   | 132110.5    | 26640.83961 | 20.16557322 |
| UIJ64909.1 | GapA-binding_peptide_SR1P_[Bacillus_cereus]                                                    | CPTF_AI         | 0           | 0           | 0           |
| UIJ64909.1 | GapA-binding_peptide_SR1P_[Bacillus_cereus]                                                    | CPTF_Cd         | 0           | 0           | 0           |
| UIJ64909.1 | GapA-binding_peptide_SR1P_[Bacillus_cereus]                                                    | CPTF_Co         | 0           | 0           | 0           |
| UIJ64909.1 | GapA-binding_peptide_SR1P_[Bacillus_cereus]                                                    | CPTF_Cu         | 0           | 0           | 0           |
| UIJ64909.1 | GapA-binding_peptide_SR1P_[Bacillus_cereus]                                                    | CPTF_Fe         | 0           | 0           | 0           |
| UIJ64909.1 | GapA-binding_peptide_SR1P_[Bacillus_cereus]                                                    | CPTF_Mn         | 0           | 0           | 0           |
| UIJ64909.1 | GapA-binding_peptide_SR1P_[Bacillus_cereus]                                                    | CPTF_Ni         | 0           | 0           | 0           |
| UIJ64909.1 | GapA-binding_peptide_SR1P_[Bacillus_cereus]                                                    | CPTF_U          | 0           | 0           | 0           |
| UIJ64909.1 | GapA-binding_peptide_SR1P_[Bacillus_cereus]                                                    | CPTF_metals_mix | 218043.3333 | 52353.10043 | 24.01041097 |
| UIJ64909.1 | GapA-binding_peptide_SR1P_[Bacillus_cereus]                                                    | CPTF_zcontrol   | 0           | 0           | 0           |
| UIJ64910.1 | DUF1885_family_protein_[Bacillus_cereus]                                                       | CPTF_AI         | 17632.76667 | 30540.84774 | 173.2050808 |
| UIJ64910.1 | DUF1885_family_protein_[Bacillus_cereus]                                                       | CPTF_Cd         | 0           | 0           | 0           |
| UIJ64910.1 | DUF1885_family_protein_[Bacillus_cereus]                                                       | CPTF_Co         | 0           | 0           | 0           |
| UIJ64910.1 | DUF1885_family_protein_[Bacillus_cereus]                                                       | CPTF_Cu         | 0           | 0           | 0           |
| UIJ64910.1 | DUF1885_family_protein_[Bacillus_cereus]                                                       | CPTF_Fe         | 0           | 0           | 0           |
| UIJ64910.1 | DUF1885_family_protein_[Bacillus_cereus]                                                       | CPTF_Mn         | 0           | 0           | 0           |
| UIJ64910.1 | DUF1885_family_protein_[Bacillus_cereus]                                                       | CPTF_Ni         | 0           | 0           | 0           |
| UIJ64910.1 | DUF1885_family_protein_[Bacillus_cereus]                                                       | CPTF_U          | 0           | 0           | 0           |
| UIJ64910.1 | DUF1885_family_protein_[Bacillus_cereus]                                                       | CPTF_metals_mix | 32291.86667 | 28332.37094 | 87.73841177 |
| UIJ64910.1 | DUF1885_family_protein_[Bacillus_cereus]                                                       | CPTF_zcontrol   | 0           | 0           | 0           |
| UIJ64912.1 | dihydrolipoyl_dehydrogenase_[Bacillus_cereus]                                                  | CPTF_AI         | 27403953.77 | 2660344.404 | 9.707885319 |
| UIJ64912.1 | dihydrolipoyl_dehydrogenase_[Bacillus_cereus]                                                  | CPTF_Cd         | 29339017.62 | 2628742.646 | 8.959886374 |
| UIJ64912.1 | dihydrolipoyl_dehydrogenase_[Bacillus_cereus]                                                  | CPTF_Co         | 25307364.07 | 2587381.17  | 10.2238272  |
| UIJ64912.1 | dihydrolipoyl_dehydrogenase_[Bacillus_cereus]                                                  | CPTF_Cu         | 26058653.1  | 863542.0589 | 3.313839958 |
| UIJ64912.1 | dihydrolipoyl_dehydrogenase_[Bacillus_cereus]                                                  | CPTF_Fe         | 26395398.3  | 521046.2952 | 1.974004292 |
| UIJ64912.1 | dihydrolipoyl_dehydrogenase_[Bacillus_cereus]                                                  | CPTF_Mn         | 26517649.87 | 2465044.174 | 9.295862139 |
| UIJ64912.1 | dihydrolipoyl_dehydrogenase_[Bacillus_cereus]                                                  | CPTF_Ni         | 22502936.03 | 1524502.792 | 6.774683935 |
| UIJ64912.1 | dihydrolipoyl_dehydrogenase_[Bacillus_cereus]                                                  | CPTF_U          | 22587884.3  | 1764821.693 | 7.813134112 |
| UIJ64912.1 | dihydrolipoyl_dehydrogenase_[Bacillus_cereus]                                                  | CPTF_metals_mix | 26655826.6  | 1570913.077 | 5.893319687 |
| UIJ64912.1 | dihydrolipoyl_dehydrogenase_[Bacillus_cereus]                                                  | CPTF_zcontrol   | 25151592.83 | 348377.8556 | 1.385112497 |
| UIJ64913.1 | pyruvate_dehydrogenase_complex_dihydrolipoyllysine-residue_acetyltransferase_[Bacillus_cereus] | CPTF_AI         | 28477194.8  | 2379379.341 | 8.355385275 |
| UIJ64913.1 | pyruvate_dehydrogenase_complex_dihydrolipoyllysine-residue_acetyltransferase_[Bacillus_cereus] | CPTF_Cd         | 28273088.27 | 663491.2612 | 2.346723693 |
| UIJ64913.1 | pyruvate_dehydrogenase_complex_dihydrolipoyllysine-residue_acetyltransferase_[Bacillus_cereus] | CPTF_Co         | 26814894.13 | 1113671.208 | 4.153181446 |
| UIJ64913.1 | pyruvate_dehydrogenase_complex_dihydrolipoyllysine-residue_acetyltransferase_[Bacillus_cereus] | CPTF_Cu         | 26920938.9  | 769870.268  | 2.859745237 |
| UIJ64913.1 | pyruvate_dehydrogenase_complex_dihydrolipoyllysine-residue_acetyltransferase_[Bacillus_cereus] | CPTF_Fe         | 26658844.53 | 325586.3511 | 1.221307063 |
| UIJ64913.1 | pyruvate_dehydrogenase_complex_dihydrolipoyllysine-residue_acetyltransferase_[Bacillus_cereus] | CPTF_Mn         | 28484515.93 | 1576694.911 | 5.535270162 |
| UIJ64913.1 | pyruvate_dehydrogenase_complex_dihydrolipoyllysine-residue_acetyltransferase_[Bacillus_cereus] | CPTF_Ni         | 26338389    | 1082265.953 | 4.109081817 |
| UIJ64913.1 | pyruvate_dehydrogenase_complex_dihydrolipoyllysine-residue_acetyltransferase_[Bacillus_cereus] | CPTF_U          | 28294660    | 1570504.509 | 5.550533241 |
| UIJ64913.1 | pyruvate_dehydrogenase_complex_dihydrolipoyllysine-residue_acetyltransferase_[Bacillus_cereus] | CPTF_metals_mix | 20746746.97 | 752421.6446 | 3.626696975 |
| UIJ64913.1 | pyruvate_dehydrogenase_complex_dihydrolipoyllysine-residue_acetyltransferase_[Bacillus_cereus] | CPTF_zcontrol   | 29067075.4  | 1712393.301 | 5.891178514 |
| UIJ64914.1 | pyruvate_dehydrogenase_complex_E1_component_subunit_beta_[Bacillus_cereus]                     | CPTF_AI         | 30685309.1  | 2859199.338 | 9.317811753 |
| UIJ64914.1 | pyruvate_dehydrogenase_complex_E1_component_subunit_beta_[Bacillus_cereus]                     | CPTF_Cd         | 33039879.7  | 1274609.758 | 3.857791764 |
| UIJ64914.1 | pyruvate_dehydrogenase_complex_E1_component_subunit_beta_[Bacillus_cereus]                     | CPTF_Co         | 28900476.67 | 1607976.055 | 5.563839219 |
| UIJ64914.1 | pyruvate_dehydrogenase_complex_E1_component_subunit_beta_[Bacillus_cereus]                     | CPTF_Cu         | 29008544.97 | 441750.8094 | 1.522829945 |
| UIJ64914.1 | pyruvate_dehydrogenase_complex_E1_component_subunit_beta_[Bacillus_cereus]                     | CPTF_Fe         | 29491482.7  | 2097828.936 | 7.113338307 |
| UIJ64914.1 | pyruvate_dehydrogenase_complex_E1_component_subunit_beta_[Bacillus_cereus]                     | CPTF_Mn         | 31992732.23 | 6876778.262 | 21.49481392 |
| UIJ64914.1 | pyruvate_dehydrogenase_complex_E1_component_subunit_beta_[Bacillus_cereus]                     | CPTF_Ni         | 24575282.37 | 1993558.267 | 8.112046231 |
| UIJ64914.1 | pyruvate_dehydrogenase_complex_E1_component_subunit_beta_[Bacillus_cereus]                     | CPTF_U          | 25744059.9  | 1446827.489 | 5.620043981 |

|            |                                                                                         |                 |             |             |             |
|------------|-----------------------------------------------------------------------------------------|-----------------|-------------|-------------|-------------|
| UIJ64914.1 | pyruvate_dehydrogenase_complex_E1_component_subunit_beta_[Bacillus_cereus]              | CPTF_metals_mix | 25307399.27 | 20253.75753 | 0.080030972 |
| UIJ64914.1 | pyruvate_dehydrogenase_complex_E1_component_subunit_beta_[Bacillus_cereus]              | CPTF_zcontrol   | 30123512.7  | 1275216.745 | 4.233293631 |
| UIJ64915.1 | pyruvate_dehydrogenase_E1_component_subunit_alpha_[Bacillus_cereus]                     | CPTF_Al         | 17963264.93 | 1988348.233 | 11.06896904 |
| UIJ64915.1 | pyruvate_dehydrogenase_E1_component_subunit_alpha_[Bacillus_cereus]                     | CPTF_Cd         | 19342189.17 | 406286.4872 | 2.100519665 |
| UIJ64915.1 | pyruvate_dehydrogenase_E1_component_subunit_alpha_[Bacillus_cereus]                     | CPTF_Co         | 16122913.67 | 1209084.847 | 7.499170882 |
| UIJ64915.1 | pyruvate_dehydrogenase_E1_component_subunit_alpha_[Bacillus_cereus]                     | CPTF_Cu         | 16055031    | 1800567.609 | 11.21497435 |
| UIJ64915.1 | pyruvate_dehydrogenase_E1_component_subunit_alpha_[Bacillus_cereus]                     | CPTF_Fe         | 16810451.33 | 1381496.688 | 8.218082075 |
| UIJ64915.1 | pyruvate_dehydrogenase_E1_component_subunit_alpha_[Bacillus_cereus]                     | CPTF_Mn         | 17743054.67 | 2587686.92  | 14.58422447 |
| UIJ64915.1 | pyruvate_dehydrogenase_E1_component_subunit_alpha_[Bacillus_cereus]                     | CPTF_Ni         | 13172349    | 689897.7447 | 5.237469374 |
| UIJ64915.1 | pyruvate_dehydrogenase_E1_component_subunit_alpha_[Bacillus_cereus]                     | CPTF_U          | 13877051    | 769556.8459 | 5.545535906 |
| UIJ64915.1 | pyruvate_dehydrogenase_E1_component_subunit_alpha_[Bacillus_cereus]                     | CPTF_metals_mix | 12579862.6  | 747067.5574 | 5.938598705 |
| UIJ64915.1 | pyruvate_dehydrogenase_E1_component_subunit_alpha_[Bacillus_cereus]                     | CPTF_zcontrol   | 17498232.5  | 353764.5282 | 2.021715783 |
| UIJ64917.1 | peptide_deformylase_[Bacillus_cereus]                                                   | CPTF_Al         | 752890.5333 | 30035.18539 | 3.989316383 |
| UIJ64917.1 | peptide_deformylase_[Bacillus_cereus]                                                   | CPTF_Cd         | 645701.6667 | 156213.4678 | 24.192824   |
| UIJ64917.1 | peptide_deformylase_[Bacillus_cereus]                                                   | CPTF_Co         | 758789.3333 | 78829.4987  | 10.38885172 |
| UIJ64917.1 | peptide_deformylase_[Bacillus_cereus]                                                   | CPTF_Cu         | 916496.6    | 9741.136878 | 1.062866668 |
| UIJ64917.1 | peptide_deformylase_[Bacillus_cereus]                                                   | CPTF_Fe         | 640423.6667 | 196737.6441 | 30.71992094 |
| UIJ64917.1 | peptide_deformylase_[Bacillus_cereus]                                                   | CPTF_Mn         | 702667.3    | 58487.33385 | 8.323616859 |
| UIJ64917.1 | peptide_deformylase_[Bacillus_cereus]                                                   | CPTF_Ni         | 631278.3    | 203467.1441 | 32.2309739  |
| UIJ64917.1 | peptide_deformylase_[Bacillus_cereus]                                                   | CPTF_U          | 534155      | 147522.4686 | 27.61791401 |
| UIJ64917.1 | peptide_deformylase_[Bacillus_cereus]                                                   | CPTF_metals_mix | 577359.7333 | 152311.9247 | 26.38076677 |
| UIJ64917.1 | peptide_deformylase_[Bacillus_cereus]                                                   | CPTF_zcontrol   | 706659.5333 | 45831.00647 | 6.485585251 |
| UIJ64918.1 | Cof-type_HAD-IIB_family_hydrolase_[Bacillus_cereus]                                     | CPTF_Al         | 25261.93333 | 43754.95203 | 173.2050808 |
| UIJ64918.1 | Cof-type_HAD-IIB_family_hydrolase_[Bacillus_cereus]                                     | CPTF_Cd         | 0           | 0           | 0           |
| UIJ64918.1 | Cof-type_HAD-IIB_family_hydrolase_[Bacillus_cereus]                                     | CPTF_Co         | 27842.6     | 24960.8976  | 89.65002406 |
| UIJ64918.1 | Cof-type_HAD-IIB_family_hydrolase_[Bacillus_cereus]                                     | CPTF_Cu         | 17850.86667 | 16724.1452  | 93.68814137 |
| UIJ64918.1 | Cof-type_HAD-IIB_family_hydrolase_[Bacillus_cereus]                                     | CPTF_Fe         | 5671.766667 | 9823.788035 | 173.2050808 |
| UIJ64918.1 | Cof-type_HAD-IIB_family_hydrolase_[Bacillus_cereus]                                     | CPTF_Mn         | 23266.46667 | 22861.90271 | 98.26117147 |
| UIJ64918.1 | Cof-type_HAD-IIB_family_hydrolase_[Bacillus_cereus]                                     | CPTF_Ni         | 0           | 0           | 0           |
| UIJ64918.1 | Cof-type_HAD-IIB_family_hydrolase_[Bacillus_cereus]                                     | CPTF_U          | 34717       | 60131.60789 | 173.2050808 |
| UIJ64918.1 | Cof-type_HAD-IIB_family_hydrolase_[Bacillus_cereus]                                     | CPTF_metals_mix | 162252.6333 | 37465.0034  | 23.09053642 |
| UIJ64918.1 | Cof-type_HAD-IIB_family_hydrolase_[Bacillus_cereus]                                     | CPTF_zcontrol   | 28998.36667 | 50226.6444  | 173.2050808 |
| UIJ64919.1 | DNA-dependent_RNA_polymerase_auxiliary_subunit_epsilon_family_protein_[Bacillus_cereus] | CPTF_Al         | 0           | 0           | 0           |
| UIJ64919.1 | DNA-dependent_RNA_polymerase_auxiliary_subunit_epsilon_family_protein_[Bacillus_cereus] | CPTF_Cd         | 0           | 0           | 0           |
| UIJ64919.1 | DNA-dependent_RNA_polymerase_auxiliary_subunit_epsilon_family_protein_[Bacillus_cereus] | CPTF_Co         | 0           | 0           | 0           |
| UIJ64919.1 | DNA-dependent_RNA_polymerase_auxiliary_subunit_epsilon_family_protein_[Bacillus_cereus] | CPTF_Cu         | 0           | 0           | 0           |
| UIJ64919.1 | DNA-dependent_RNA_polymerase_auxiliary_subunit_epsilon_family_protein_[Bacillus_cereus] | CPTF_Fe         | 0           | 0           | 0           |
| UIJ64919.1 | DNA-dependent_RNA_polymerase_auxiliary_subunit_epsilon_family_protein_[Bacillus_cereus] | CPTF_Mn         | 0           | 0           | 0           |
| UIJ64919.1 | DNA-dependent_RNA_polymerase_auxiliary_subunit_epsilon_family_protein_[Bacillus_cereus] | CPTF_Ni         | 0           | 0           | 0           |
| UIJ64919.1 | DNA-dependent_RNA_polymerase_auxiliary_subunit_epsilon_family_protein_[Bacillus_cereus] | CPTF_U          | 0           | 0           | 0           |
| UIJ64919.1 | DNA-dependent_RNA_polymerase_auxiliary_subunit_epsilon_family_protein_[Bacillus_cereus] | CPTF_metals_mix | 158957      | 164518.7944 | 103.4989302 |
| UIJ64919.1 | DNA-dependent_RNA_polymerase_auxiliary_subunit_epsilon_family_protein_[Bacillus_cereus] | CPTF_zcontrol   | 0           | 0           | 0           |
| UIJ64920.1 | ribonuclease_J1_[Bacillus_cereus]                                                       | CPTF_Al         | 4051165.833 | 902441.0339 | 22.27608227 |
| UIJ64920.1 | ribonuclease_J1_[Bacillus_cereus]                                                       | CPTF_Cd         | 4247121.367 | 1030136.101 | 24.25492496 |
| UIJ64920.1 | ribonuclease_J1_[Bacillus_cereus]                                                       | CPTF_Co         | 4441857.4   | 536718.9409 | 12.08320963 |
| UIJ64920.1 | ribonuclease_J1_[Bacillus_cereus]                                                       | CPTF_Cu         | 4465074.933 | 443197.236  | 9.925863343 |
| UIJ64920.1 | ribonuclease_J1_[Bacillus_cereus]                                                       | CPTF_Fe         | 4611708.133 | 926771.2458 | 20.09605159 |
| UIJ64920.1 | ribonuclease_J1_[Bacillus_cereus]                                                       | CPTF_Mn         | 4029454.967 | 290497.867  | 7.20935882  |
| UIJ64920.1 | ribonuclease_J1_[Bacillus_cereus]                                                       | CPTF_Ni         | 3541748.233 | 221830.3951 | 6.263302202 |
| UIJ64920.1 | ribonuclease_J1_[Bacillus_cereus]                                                       | CPTF_U          | 3529498.433 | 493701.5599 | 13.98786738 |
| UIJ64920.1 | ribonuclease_J1_[Bacillus_cereus]                                                       | CPTF_metals_mix | 6503246.167 | 592062.9957 | 9.104114783 |
| UIJ64920.1 | ribonuclease_J1_[Bacillus_cereus]                                                       | CPTF_zcontrol   | 4333252.567 | 727276.9137 | 16.78362621 |
| UIJ64921.1 | TrkA_family_potassium_uptake_protein_[Bacillus_cereus]                                  | CPTF_Al         | 213972.3333 | 10000.4858  | 4.673728444 |
| UIJ64921.1 | TrkA_family_potassium_uptake_protein_[Bacillus_cereus]                                  | CPTF_Cd         | 179110.2    | 76730.19241 | 42.83965537 |
| UIJ64921.1 | TrkA_family_potassium_uptake_protein_[Bacillus_cereus]                                  | CPTF_Co         | 219473      | 6678.036613 | 3.042759981 |
| UIJ64921.1 | TrkA_family_potassium_uptake_protein_[Bacillus_cereus]                                  | CPTF_Cu         | 207584.3333 | 22629.82723 | 10.90151018 |
| UIJ64921.1 | TrkA_family_potassium_uptake_protein_[Bacillus_cereus]                                  | CPTF_Fe         | 225151.6667 | 36309.78601 | 16.12681201 |
| UIJ64921.1 | TrkA_family_potassium_uptake_protein_[Bacillus_cereus]                                  | CPTF_Mn         | 224853      | 9291.105639 | 4.13207991  |
| UIJ64921.1 | TrkA_family_potassium_uptake_protein_[Bacillus_cereus]                                  | CPTF_Ni         | 247344      | 25719.36914 | 10.39821833 |
| UIJ64921.1 | TrkA_family_potassium_uptake_protein_[Bacillus_cereus]                                  | CPTF_U          | 283067.6667 | 87451.75295 | 30.89429251 |
| UIJ64921.1 | TrkA_family_potassium_uptake_protein_[Bacillus_cereus]                                  | CPTF_metals_mix | 205350.3    | 36031.34637 | 17.54628377 |

|            |                                                                                    |                 |             |             |             |
|------------|------------------------------------------------------------------------------------|-----------------|-------------|-------------|-------------|
| UIJ64921.1 | TrkA_family_potassium_uptake_protein_[Bacillus_cereus]                             | CPTF_zcontrol   | 196585      | 45906.93008 | 23.35220392 |
| UIJ64923.1 | N-acetyldiaminopimelate_deacetylase_[Bacillus_cereus]                              | CPTF_Al         | 297293.6667 | 257564.9281 | 86.63653383 |
| UIJ64923.1 | N-acetyldiaminopimelate_deacetylase_[Bacillus_cereus]                              | CPTF_Cd         | 379441.6667 | 23308.64604 | 6.142879944 |
| UIJ64923.1 | N-acetyldiaminopimelate_deacetylase_[Bacillus_cereus]                              | CPTF_Co         | 181052.8333 | 185859.1728 | 102.6546613 |
| UIJ64923.1 | N-acetyldiaminopimelate_deacetylase_[Bacillus_cereus]                              | CPTF_Cu         | 401693.6333 | 30816.40883 | 7.67161993  |
| UIJ64923.1 | N-acetyldiaminopimelate_deacetylase_[Bacillus_cereus]                              | CPTF_Fe         | 437815.5333 | 26251.03373 | 5.995911915 |
| UIJ64923.1 | N-acetyldiaminopimelate_deacetylase_[Bacillus_cereus]                              | CPTF_Mn         | 161355.7333 | 279476.3282 | 173.2050808 |
| UIJ64923.1 | N-acetyldiaminopimelate_deacetylase_[Bacillus_cereus]                              | CPTF_Ni         | 397974.9667 | 141548.9284 | 35.56729449 |
| UIJ64923.1 | N-acetyldiaminopimelate_deacetylase_[Bacillus_cereus]                              | CPTF_U          | 481102.6667 | 51563.0593  | 10.71768312 |
| UIJ64923.1 | N-acetyldiaminopimelate_deacetylase_[Bacillus_cereus]                              | CPTF_metals_mix | 122958.3333 | 212970.0805 | 173.2050808 |
| UIJ64923.1 | N-acetyldiaminopimelate_deacetylase_[Bacillus_cereus]                              | CPTF_zcontrol   | 499801.9667 | 42012.77565 | 8.40588442  |
| UIJ64924.1 | 2,3,4,5-tetrahydropyridine-2,6-dicarboxylate_N-acetyltransferase_[Bacillus_cereus] | CPTF_Al         | 5995299     | 454360.9404 | 7.578620188 |
| UIJ64924.1 | 2,3,4,5-tetrahydropyridine-2,6-dicarboxylate_N-acetyltransferase_[Bacillus_cereus] | CPTF_Cd         | 7158233.333 | 806085.218  | 11.26095198 |
| UIJ64924.1 | 2,3,4,5-tetrahydropyridine-2,6-dicarboxylate_N-acetyltransferase_[Bacillus_cereus] | CPTF_Co         | 6079198.1   | 557852.1471 | 9.176410077 |
| UIJ64924.1 | 2,3,4,5-tetrahydropyridine-2,6-dicarboxylate_N-acetyltransferase_[Bacillus_cereus] | CPTF_Cu         | 6133018.967 | 51676.48714 | 0.842594608 |
| UIJ64924.1 | 2,3,4,5-tetrahydropyridine-2,6-dicarboxylate_N-acetyltransferase_[Bacillus_cereus] | CPTF_Fe         | 6412776.133 | 183703.5907 | 2.864649988 |
| UIJ64924.1 | 2,3,4,5-tetrahydropyridine-2,6-dicarboxylate_N-acetyltransferase_[Bacillus_cereus] | CPTF_Mn         | 6614468.9   | 140958.8002 | 2.131067548 |
| UIJ64924.1 | 2,3,4,5-tetrahydropyridine-2,6-dicarboxylate_N-acetyltransferase_[Bacillus_cereus] | CPTF_Ni         | 5331916.867 | 96660.92322 | 1.812873787 |
| UIJ64924.1 | 2,3,4,5-tetrahydropyridine-2,6-dicarboxylate_N-acetyltransferase_[Bacillus_cereus] | CPTF_U          | 6604942     | 210270.5824 | 3.183534124 |
| UIJ64924.1 | 2,3,4,5-tetrahydropyridine-2,6-dicarboxylate_N-acetyltransferase_[Bacillus_cereus] | CPTF_metals_mix | 7989914.933 | 1458767.95  | 18.25761554 |
| UIJ64924.1 | 2,3,4,5-tetrahydropyridine-2,6-dicarboxylate_N-acetyltransferase_[Bacillus_cereus] | CPTF_zcontrol   | 6813536.333 | 487463.4848 | 7.154338965 |
| UIJ64930.1 | YkuJ_family_protein_[Bacillus_cereus]                                              | CPTF_Al         | 1614856.333 | 75426.92871 | 4.670813567 |
| UIJ64930.1 | YkuJ_family_protein_[Bacillus_cereus]                                              | CPTF_Cd         | 1409777.333 | 439217.8407 | 31.15512147 |
| UIJ64930.1 | YkuJ_family_protein_[Bacillus_cereus]                                              | CPTF_Co         | 1660717.667 | 183102.3252 | 11.02549391 |
| UIJ64930.1 | YkuJ_family_protein_[Bacillus_cereus]                                              | CPTF_Cu         | 1701388.667 | 17151.7117  | 1.008100738 |
| UIJ64930.1 | YkuJ_family_protein_[Bacillus_cereus]                                              | CPTF_Fe         | 1658959     | 142451.5955 | 8.586806277 |
| UIJ64930.1 | YkuJ_family_protein_[Bacillus_cereus]                                              | CPTF_Mn         | 1628183     | 120464.2037 | 7.398689438 |
| UIJ64930.1 | YkuJ_family_protein_[Bacillus_cereus]                                              | CPTF_Ni         | 1398787.333 | 343255.6211 | 24.53951454 |
| UIJ64930.1 | YkuJ_family_protein_[Bacillus_cereus]                                              | CPTF_U          | 1132149.333 | 328720.2814 | 29.03506381 |
| UIJ64930.1 | YkuJ_family_protein_[Bacillus_cereus]                                              | CPTF_metals_mix | 1536180.133 | 13155.48239 | 0.856376287 |
| UIJ64930.1 | YkuJ_family_protein_[Bacillus_cereus]                                              | CPTF_zcontrol   | 1628604.667 | 80196.3397  | 4.924236148 |
| UIJ64934.1 | 2,4-dienoyl-CoA_reductase_[Bacillus_cereus]                                        | CPTF_Al         | 2173495.567 | 295312.0474 | 13.58696341 |
| UIJ64934.1 | 2,4-dienoyl-CoA_reductase_[Bacillus_cereus]                                        | CPTF_Cd         | 3202785.033 | 480198.835  | 14.99316447 |
| UIJ64934.1 | 2,4-dienoyl-CoA_reductase_[Bacillus_cereus]                                        | CPTF_Co         | 1749347.367 | 159102.1293 | 9.094942053 |
| UIJ64934.1 | 2,4-dienoyl-CoA_reductase_[Bacillus_cereus]                                        | CPTF_Cu         | 1603373.6   | 161303.3301 | 10.0602461  |
| UIJ64934.1 | 2,4-dienoyl-CoA_reductase_[Bacillus_cereus]                                        | CPTF_Fe         | 2330555.2   | 658357.3013 | 28.24894691 |
| UIJ64934.1 | 2,4-dienoyl-CoA_reductase_[Bacillus_cereus]                                        | CPTF_Mn         | 2355857.367 | 1403082.824 | 59.55720596 |
| UIJ64934.1 | 2,4-dienoyl-CoA_reductase_[Bacillus_cereus]                                        | CPTF_Ni         | 965826.1333 | 415833.4324 | 43.05468842 |
| UIJ64934.1 | 2,4-dienoyl-CoA_reductase_[Bacillus_cereus]                                        | CPTF_U          | 729803.5667 | 371512.5334 | 50.90582594 |
| UIJ64934.1 | 2,4-dienoyl-CoA_reductase_[Bacillus_cereus]                                        | CPTF_metals_mix | 2348219.667 | 238370.5749 | 10.15111909 |
| UIJ64934.1 | 2,4-dienoyl-CoA_reductase_[Bacillus_cereus]                                        | CPTF_zcontrol   | 1727834.767 | 435189.0242 | 25.18695842 |
| UIJ64938.1 | cytoplasmic_protein_[Bacillus_cereus]                                              | CPTF_Al         | 13673.56667 | 23683.31219 | 173.2050808 |
| UIJ64938.1 | cytoplasmic_protein_[Bacillus_cereus]                                              | CPTF_Cd         | 0           | 0           | 0           |
| UIJ64938.1 | cytoplasmic_protein_[Bacillus_cereus]                                              | CPTF_Co         | 17389.1     | 30118.8047  | 173.2050808 |
| UIJ64938.1 | cytoplasmic_protein_[Bacillus_cereus]                                              | CPTF_Cu         | 0           | 0           | 0           |
| UIJ64938.1 | cytoplasmic_protein_[Bacillus_cereus]                                              | CPTF_Fe         | 13538.13333 | 23448.73477 | 173.2050808 |
| UIJ64938.1 | cytoplasmic_protein_[Bacillus_cereus]                                              | CPTF_Mn         | 41688.83333 | 37379.80662 | 89.66383473 |
| UIJ64938.1 | cytoplasmic_protein_[Bacillus_cereus]                                              | CPTF_Ni         | 0           | 0           | 0           |
| UIJ64938.1 | cytoplasmic_protein_[Bacillus_cereus]                                              | CPTF_U          | 0           | 0           | 0           |
| UIJ64938.1 | cytoplasmic_protein_[Bacillus_cereus]                                              | CPTF_metals_mix | 73734       | 9989.28161  | 13.54772779 |
| UIJ64938.1 | cytoplasmic_protein_[Bacillus_cereus]                                              | CPTF_zcontrol   | 21446.6     | 37146.60085 | 173.2050808 |
| UIJ64939.1 | YkyA_family_protein_[Bacillus_cereus]                                              | CPTF_Al         | 0           | 0           | 0           |
| UIJ64939.1 | YkyA_family_protein_[Bacillus_cereus]                                              | CPTF_Cd         | 0           | 0           | 0           |
| UIJ64939.1 | YkyA_family_protein_[Bacillus_cereus]                                              | CPTF_Co         | 11027.43333 | 19100.07481 | 173.2050808 |
| UIJ64939.1 | YkyA_family_protein_[Bacillus_cereus]                                              | CPTF_Cu         | 0           | 0           | 0           |
| UIJ64939.1 | YkyA_family_protein_[Bacillus_cereus]                                              | CPTF_Fe         | 0           | 0           | 0           |
| UIJ64939.1 | YkyA_family_protein_[Bacillus_cereus]                                              | CPTF_Mn         | 0           | 0           | 0           |
| UIJ64939.1 | YkyA_family_protein_[Bacillus_cereus]                                              | CPTF_Ni         | 0           | 0           | 0           |
| UIJ64939.1 | YkyA_family_protein_[Bacillus_cereus]                                              | CPTF_U          | 0           | 0           | 0           |
| UIJ64939.1 | YkyA_family_protein_[Bacillus_cereus]                                              | CPTF_metals_mix | 9746.9      | 16882.12602 | 173.2050808 |
| UIJ64939.1 | YkyA_family_protein_[Bacillus_cereus]                                              | CPTF_zcontrol   | 0           | 0           | 0           |

|            |                                                                                                 |                 |             |             |             |
|------------|-------------------------------------------------------------------------------------------------|-----------------|-------------|-------------|-------------|
| UIJ64945.1 | 5-methyltetrahydropteroyltrimethylglutamate--homocysteine_S-methyltransferase_[Bacillus_cereus] | CPTF_Al         | 1411097.867 | 274601.0399 | 19.46009886 |
| UIJ64945.1 | 5-methyltetrahydropteroyltrimethylglutamate--homocysteine_S-methyltransferase_[Bacillus_cereus] | CPTF_Cd         | 1796765.167 | 322136.354  | 17.92868428 |
| UIJ64945.1 | 5-methyltetrahydropteroyltrimethylglutamate--homocysteine_S-methyltransferase_[Bacillus_cereus] | CPTF_Co         | 1574693.1   | 120632.6092 | 7.660706027 |
| UIJ64945.1 | 5-methyltetrahydropteroyltrimethylglutamate--homocysteine_S-methyltransferase_[Bacillus_cereus] | CPTF_Cu         | 1179195.9   | 224296.8669 | 19.02117086 |
| UIJ64945.1 | 5-methyltetrahydropteroyltrimethylglutamate--homocysteine_S-methyltransferase_[Bacillus_cereus] | CPTF_Fe         | 1058855.667 | 374499.9933 | 35.36837031 |
| UIJ64945.1 | 5-methyltetrahydropteroyltrimethylglutamate--homocysteine_S-methyltransferase_[Bacillus_cereus] | CPTF_Mn         | 1074382.067 | 266670.9899 | 24.82087129 |
| UIJ64945.1 | 5-methyltetrahydropteroyltrimethylglutamate--homocysteine_S-methyltransferase_[Bacillus_cereus] | CPTF_Ni         | 1046316.6   | 210113.4537 | 20.08125014 |
| UIJ64945.1 | 5-methyltetrahydropteroyltrimethylglutamate--homocysteine_S-methyltransferase_[Bacillus_cereus] | CPTF_U          | 1284077.333 | 259974.8917 | 20.24604632 |
| UIJ64945.1 | 5-methyltetrahydropteroyltrimethylglutamate--homocysteine_S-methyltransferase_[Bacillus_cereus] | CPTF_metals_mix | 2359848.733 | 34173.50556 | 1.448122716 |
| UIJ64945.1 | 5-methyltetrahydropteroyltrimethylglutamate--homocysteine_S-methyltransferase_[Bacillus_cereus] | CPTF_zcontrol   | 1396364     | 419085.9772 | 30.01265982 |
| UIJ64949.1 | hypothetical_protein_LW858_18470_[Bacillus_cereus]                                              | CPTF_Al         | 131584.8    | 60761.4143  | 46.17662094 |
| UIJ64949.1 | hypothetical_protein_LW858_18470_[Bacillus_cereus]                                              | CPTF_Cd         | 140497.6667 | 33531.59323 | 23.86629901 |
| UIJ64949.1 | hypothetical_protein_LW858_18470_[Bacillus_cereus]                                              | CPTF_Co         | 124191.8667 | 56275.93118 | 45.31370104 |
| UIJ64949.1 | hypothetical_protein_LW858_18470_[Bacillus_cereus]                                              | CPTF_Cu         | 123256.9    | 78503.69634 | 63.69111696 |
| UIJ64949.1 | hypothetical_protein_LW858_18470_[Bacillus_cereus]                                              | CPTF_Fe         | 99657.7     | 62649.4638  | 62.86464949 |
| UIJ64949.1 | hypothetical_protein_LW858_18470_[Bacillus_cereus]                                              | CPTF_Mn         | 91121.46667 | 43883.76027 | 48.15962898 |
| UIJ64949.1 | hypothetical_protein_LW858_18470_[Bacillus_cereus]                                              | CPTF_Ni         | 255157.5333 | 32897.37437 | 12.89296614 |
| UIJ64949.1 | hypothetical_protein_LW858_18470_[Bacillus_cereus]                                              | CPTF_U          | 39282.33333 | 68038.99717 | 173.2050808 |
| UIJ64949.1 | hypothetical_protein_LW858_18470_[Bacillus_cereus]                                              | CPTF_metals_mix | 114935.2667 | 39104.44525 | 34.02301694 |
| UIJ64949.1 | hypothetical_protein_LW858_18470_[Bacillus_cereus]                                              | CPTF_zcontrol   | 152166.3333 | 42485.53218 | 27.92045471 |
| UIJ64950.1 | aminotransferase_A_[Bacillus_cereus]                                                            | CPTF_Al         | 74204       | 128525.0981 | 173.2050808 |
| UIJ64950.1 | aminotransferase_A_[Bacillus_cereus]                                                            | CPTF_Cd         | 78141       | 75264.77332 | 96.31918368 |
| UIJ64950.1 | aminotransferase_A_[Bacillus_cereus]                                                            | CPTF_Co         | 97566.66667 | 86754.76399 | 88.91844618 |
| UIJ64950.1 | aminotransferase_A_[Bacillus_cereus]                                                            | CPTF_Cu         | 157596.6667 | 146665.5802 | 93.06388475 |
| UIJ64950.1 | aminotransferase_A_[Bacillus_cereus]                                                            | CPTF_Fe         | 0           | 0           | 0           |
| UIJ64950.1 | aminotransferase_A_[Bacillus_cereus]                                                            | CPTF_Mn         | 166152.6667 | 287784.8605 | 173.2050808 |
| UIJ64950.1 | aminotransferase_A_[Bacillus_cereus]                                                            | CPTF_Ni         | 423172      | 374445.6214 | 88.48544361 |
| UIJ64950.1 | aminotransferase_A_[Bacillus_cereus]                                                            | CPTF_U          | 48931.33333 | 84751.55542 | 173.2050808 |
| UIJ64950.1 | aminotransferase_A_[Bacillus_cereus]                                                            | CPTF_metals_mix | 191112.8333 | 149181.9274 | 78.05960739 |
| UIJ64950.1 | aminotransferase_A_[Bacillus_cereus]                                                            | CPTF_zcontrol   | 0           | 0           | 0           |
| UIJ64954.1 | extracellular_solute-binding_protein_[Bacillus_cereus]                                          | CPTF_Al         | 92309.26667 | 31341.73633 | 33.9529686  |
| UIJ64954.1 | extracellular_solute-binding_protein_[Bacillus_cereus]                                          | CPTF_Cd         | 90990.9     | 18145.95327 | 19.94260224 |
| UIJ64954.1 | extracellular_solute-binding_protein_[Bacillus_cereus]                                          | CPTF_Co         | 93111.16667 | 47261.22767 | 50.75785146 |
| UIJ64954.1 | extracellular_solute-binding_protein_[Bacillus_cereus]                                          | CPTF_Cu         | 131865.1667 | 29082.19795 | 22.05449603 |
| UIJ64954.1 | extracellular_solute-binding_protein_[Bacillus_cereus]                                          | CPTF_Fe         | 128690.3333 | 17036.79378 | 13.23859636 |
| UIJ64954.1 | extracellular_solute-binding_protein_[Bacillus_cereus]                                          | CPTF_Mn         | 130049.7    | 54141.69493 | 41.63154158 |
| UIJ64954.1 | extracellular_solute-binding_protein_[Bacillus_cereus]                                          | CPTF_Ni         | 112232.8333 | 31292.23687 | 27.88153515 |
| UIJ64954.1 | extracellular_solute-binding_protein_[Bacillus_cereus]                                          | CPTF_U          | 148600      | 35234.11916 | 23.71071276 |
| UIJ64954.1 | extracellular_solute-binding_protein_[Bacillus_cereus]                                          | CPTF_metals_mix | 16993.5     | 16016.82523 | 94.25265681 |
| UIJ64954.1 | extracellular_solute-binding_protein_[Bacillus_cereus]                                          | CPTF_zcontrol   | 41975       | 11424.8645  | 27.21825967 |
| UIJ64957.1 | sn-glycerol-3-phosphate_ABC_transporter_ATP-binding_protein_UgpC_[Bacillus_cereus]              | CPTF_Al         | 0           | 0           | 0           |
| UIJ64957.1 | sn-glycerol-3-phosphate_ABC_transporter_ATP-binding_protein_UgpC_[Bacillus_cereus]              | CPTF_Cd         | 0           | 0           | 0           |
| UIJ64957.1 | sn-glycerol-3-phosphate_ABC_transporter_ATP-binding_protein_UgpC_[Bacillus_cereus]              | CPTF_Co         | 0           | 0           | 0           |
| UIJ64957.1 | sn-glycerol-3-phosphate_ABC_transporter_ATP-binding_protein_UgpC_[Bacillus_cereus]              | CPTF_Cu         | 0           | 0           | 0           |
| UIJ64957.1 | sn-glycerol-3-phosphate_ABC_transporter_ATP-binding_protein_UgpC_[Bacillus_cereus]              | CPTF_Fe         | 0           | 0           | 0           |
| UIJ64957.1 | sn-glycerol-3-phosphate_ABC_transporter_ATP-binding_protein_UgpC_[Bacillus_cereus]              | CPTF_Mn         | 0           | 0           | 0           |
| UIJ64957.1 | sn-glycerol-3-phosphate_ABC_transporter_ATP-binding_protein_UgpC_[Bacillus_cereus]              | CPTF_Ni         | 0           | 0           | 0           |
| UIJ64957.1 | sn-glycerol-3-phosphate_ABC_transporter_ATP-binding_protein_UgpC_[Bacillus_cereus]              | CPTF_U          | 0           | 0           | 0           |
| UIJ64957.1 | sn-glycerol-3-phosphate_ABC_transporter_ATP-binding_protein_UgpC_[Bacillus_cereus]              | CPTF_metals_mix | 593946      | 514439.3175 | 86.61381969 |
| UIJ64957.1 | sn-glycerol-3-phosphate_ABC_transporter_ATP-binding_protein_UgpC_[Bacillus_cereus]              | CPTF_zcontrol   | 0           | 0           | 0           |
| UIJ64964.1 | acetyl-CoA_C-acetyltransferase_[Bacillus_cereus]                                                | CPTF_Al         | 21007541.1  | 256463.3022 | 1.220815425 |
| UIJ64964.1 | acetyl-CoA_C-acetyltransferase_[Bacillus_cereus]                                                | CPTF_Cd         | 20184219.4  | 1163617.14  | 5.764984602 |
| UIJ64964.1 | acetyl-CoA_C-acetyltransferase_[Bacillus_cereus]                                                | CPTF_Co         | 18523445.7  | 886852.671  | 4.787730563 |
| UIJ64964.1 | acetyl-CoA_C-acetyltransferase_[Bacillus_cereus]                                                | CPTF_Cu         | 21276864.5  | 360873.3539 | 1.696083339 |
| UIJ64964.1 | acetyl-CoA_C-acetyltransferase_[Bacillus_cereus]                                                | CPTF_Fe         | 21138920.37 | 1015714.925 | 4.804951753 |
| UIJ64964.1 | acetyl-CoA_C-acetyltransferase_[Bacillus_cereus]                                                | CPTF_Mn         | 21203532.37 | 1903067.251 | 8.975236851 |
| UIJ64964.1 | acetyl-CoA_C-acetyltransferase_[Bacillus_cereus]                                                | CPTF_Ni         | 20907760.57 | 2205650.619 | 10.54943504 |
| UIJ64964.1 | acetyl-CoA_C-acetyltransferase_[Bacillus_cereus]                                                | CPTF_U          | 19208323.67 | 1713712.208 | 8.921716635 |
| UIJ64964.1 | acetyl-CoA_C-acetyltransferase_[Bacillus_cereus]                                                | CPTF_metals_mix | 17194916.2  | 1832532.434 | 10.65740834 |
| UIJ64964.1 | acetyl-CoA_C-acetyltransferase_[Bacillus_cereus]                                                | CPTF_zcontrol   | 20190460.13 | 696457.9459 | 3.449440683 |
| UIJ64965.1 | NUDIX_hydrolase_[Bacillus_cereus]                                                               | CPTF_Al         | 86620.33333 | 150030.8183 | 173.2050808 |



|            |                                                   |                 |             |             |             |
|------------|---------------------------------------------------|-----------------|-------------|-------------|-------------|
| UIJ64965.1 | NUDIX_hydrolase_[Bacillus_cereus]                 | CPTF_Cd         | 107185.0333 | 121280.5454 | 113.1506346 |
| UIJ64965.1 | NUDIX_hydrolase_[Bacillus_cereus]                 | CPTF_Co         | 112969.6667 | 195669.2024 | 173.2050808 |
| UIJ64965.1 | NUDIX_hydrolase_[Bacillus_cereus]                 | CPTF_Cu         | 91303.33333 | 158142.0122 | 173.2050808 |
| UIJ64965.1 | NUDIX_hydrolase_[Bacillus_cereus]                 | CPTF_Fe         | 0           | 0           | 0           |
| UIJ64965.1 | NUDIX_hydrolase_[Bacillus_cereus]                 | CPTF_Mn         | 64800       | 62558.18112 | 96.54040296 |
| UIJ64965.1 | NUDIX_hydrolase_[Bacillus_cereus]                 | CPTF_Ni         | 0           | 0           | 0           |
| UIJ64965.1 | NUDIX_hydrolase_[Bacillus_cereus]                 | CPTF_U          | 117174.9    | 101481.907  | 86.60720594 |
| UIJ64965.1 | NUDIX_hydrolase_[Bacillus_cereus]                 | CPTF_metals_mix | 18381.53333 | 31837.74965 | 173.2050808 |
| UIJ64965.1 | NUDIX_hydrolase_[Bacillus_cereus]                 | CPTF_zcontrol   | 171679.3333 | 169335.7898 | 98.63492976 |
| UIJ64966.1 | DUF3928_family_protein_[Bacillus_cereus]          | CPTF_Al         | 2073810.333 | 85996.66851 | 4.146795255 |
| UIJ64966.1 | DUF3928_family_protein_[Bacillus_cereus]          | CPTF_Cd         | 2518728.667 | 535968.8085 | 21.27933888 |
| UIJ64966.1 | DUF3928_family_protein_[Bacillus_cereus]          | CPTF_Co         | 1873408     | 132508.8907 | 7.073146413 |
| UIJ64966.1 | DUF3928_family_protein_[Bacillus_cereus]          | CPTF_Cu         | 1774397     | 17786.37605 | 1.002389885 |
| UIJ64966.1 | DUF3928_family_protein_[Bacillus_cereus]          | CPTF_Fe         | 2330711     | 619462.7832 | 26.57827518 |
| UIJ64966.1 | DUF3928_family_protein_[Bacillus_cereus]          | CPTF_Mn         | 2409849     | 413371.6476 | 17.15342528 |
| UIJ64966.1 | DUF3928_family_protein_[Bacillus_cereus]          | CPTF_Ni         | 2103405.667 | 99471.90856 | 4.72908817  |
| UIJ64966.1 | DUF3928_family_protein_[Bacillus_cereus]          | CPTF_U          | 1320634.667 | 489475.221  | 37.06363564 |
| UIJ64966.1 | DUF3928_family_protein_[Bacillus_cereus]          | CPTF_metals_mix | 3126109.533 | 176167.1643 | 5.635348422 |
| UIJ64966.1 | DUF3928_family_protein_[Bacillus_cereus]          | CPTF_zcontrol   | 2058928     | 320321.6    | 15.55768827 |
| UIJ64970.1 | 3-hydroxybutyrate_dehydrogenase_[Bacillus_cereus] | CPTF_Al         | 2394020.867 | 1259116.508 | 52.59421609 |
| UIJ64970.1 | 3-hydroxybutyrate_dehydrogenase_[Bacillus_cereus] | CPTF_Cd         | 2449560.033 | 1276807.334 | 52.12394537 |
| UIJ64970.1 | 3-hydroxybutyrate_dehydrogenase_[Bacillus_cereus] | CPTF_Co         | 2498885.733 | 1108612.531 | 44.36427468 |
| UIJ64970.1 | 3-hydroxybutyrate_dehydrogenase_[Bacillus_cereus] | CPTF_Cu         | 2092487.2   | 1119276.269 | 53.49023252 |
| UIJ64970.1 | 3-hydroxybutyrate_dehydrogenase_[Bacillus_cereus] | CPTF_Fe         | 1437792.367 | 736835.1692 | 51.24767569 |
| UIJ64970.1 | 3-hydroxybutyrate_dehydrogenase_[Bacillus_cereus] | CPTF_Mn         | 1588182.967 | 909983.3629 | 57.29713654 |
| UIJ64970.1 | 3-hydroxybutyrate_dehydrogenase_[Bacillus_cereus] | CPTF_Ni         | 1583687.967 | 957596.5772 | 60.46624066 |
| UIJ64970.1 | 3-hydroxybutyrate_dehydrogenase_[Bacillus_cereus] | CPTF_U          | 917593.0667 | 63829.91414 | 6.956233265 |
| UIJ64970.1 | 3-hydroxybutyrate_dehydrogenase_[Bacillus_cereus] | CPTF_metals_mix | 640404.3    | 21098.24047 | 3.294518864 |
| UIJ64970.1 | 3-hydroxybutyrate_dehydrogenase_[Bacillus_cereus] | CPTF_zcontrol   | 891895.7333 | 8447.983371 | 0.947194056 |
| UIJ64978.1 | cupin_domain-containing_protein_[Bacillus_cereus] | CPTF_Al         | 159613.1333 | 142520.6359 | 89.29129635 |
| UIJ64978.1 | cupin_domain-containing_protein_[Bacillus_cereus] | CPTF_Cd         | 167307.8    | 152290.6354 | 91.02422924 |
| UIJ64978.1 | cupin_domain-containing_protein_[Bacillus_cereus] | CPTF_Co         | 141215.3333 | 122966.4877 | 87.0772917  |
| UIJ64978.1 | cupin_domain-containing_protein_[Bacillus_cereus] | CPTF_Cu         | 102483      | 93776.56002 | 91.5045032  |
| UIJ64978.1 | cupin_domain-containing_protein_[Bacillus_cereus] | CPTF_Fe         | 181352.3333 | 177190.0812 | 97.70488083 |
| UIJ64978.1 | cupin_domain-containing_protein_[Bacillus_cereus] | CPTF_Mn         | 221817.8    | 105861.9655 | 47.72473874 |
| UIJ64978.1 | cupin_domain-containing_protein_[Bacillus_cereus] | CPTF_Ni         | 13500.23333 | 23383.09005 | 173.2050808 |
| UIJ64978.1 | cupin_domain-containing_protein_[Bacillus_cereus] | CPTF_U          | 79417.66667 | 137555.4337 | 173.2050808 |
| UIJ64978.1 | cupin_domain-containing_protein_[Bacillus_cereus] | CPTF_metals_mix | 288182.4667 | 37638.05307 | 13.06049376 |
| UIJ64978.1 | cupin_domain-containing_protein_[Bacillus_cereus] | CPTF_zcontrol   | 262419      | 79860.24033 | 30.43233925 |
| UIJ64980.1 | DUF3909_family_protein_[Bacillus_cereus]          | CPTF_Al         | 603884      | 43638.45395 | 7.226297426 |
| UIJ64980.1 | DUF3909_family_protein_[Bacillus_cereus]          | CPTF_Cd         | 614389.6667 | 31724.65981 | 5.163605694 |
| UIJ64980.1 | DUF3909_family_protein_[Bacillus_cereus]          | CPTF_Co         | 567334.3333 | 57408.74909 | 10.11903312 |
| UIJ64980.1 | DUF3909_family_protein_[Bacillus_cereus]          | CPTF_Cu         | 639669.6667 | 42452.23303 | 6.636586858 |
| UIJ64980.1 | DUF3909_family_protein_[Bacillus_cereus]          | CPTF_Fe         | 615563      | 23585.77921 | 3.831578443 |
| UIJ64980.1 | DUF3909_family_protein_[Bacillus_cereus]          | CPTF_Mn         | 566898      | 26042.80632 | 4.593913953 |
| UIJ64980.1 | DUF3909_family_protein_[Bacillus_cereus]          | CPTF_Ni         | 611190.6667 | 73913.24764 | 12.09332074 |
| UIJ64980.1 | DUF3909_family_protein_[Bacillus_cereus]          | CPTF_U          | 649963.3333 | 113152.277  | 17.40902467 |
| UIJ64980.1 | DUF3909_family_protein_[Bacillus_cereus]          | CPTF_metals_mix | 512923.6667 | 21468.52061 | 4.185519602 |
| UIJ64980.1 | DUF3909_family_protein_[Bacillus_cereus]          | CPTF_zcontrol   | 675747.3333 | 60394.03229 | 8.937368941 |
| UIJ64981.1 | NAD(P)-dependent_oxidoreductase_[Bacillus_cereus] | CPTF_Al         | 713580.0333 | 311171.4299 | 43.60708195 |
| UIJ64981.1 | NAD(P)-dependent_oxidoreductase_[Bacillus_cereus] | CPTF_Cd         | 911088.6667 | 385484.8994 | 42.31036051 |
| UIJ64981.1 | NAD(P)-dependent_oxidoreductase_[Bacillus_cereus] | CPTF_Co         | 968731.5    | 199123.5183 | 20.5550783  |
| UIJ64981.1 | NAD(P)-dependent_oxidoreductase_[Bacillus_cereus] | CPTF_Cu         | 823441.7667 | 309728.9052 | 37.61394159 |
| UIJ64981.1 | NAD(P)-dependent_oxidoreductase_[Bacillus_cereus] | CPTF_Fe         | 693141.2667 | 335096.3567 | 48.34459767 |
| UIJ64981.1 | NAD(P)-dependent_oxidoreductase_[Bacillus_cereus] | CPTF_Mn         | 429588.8    | 22000.95955 | 5.121399707 |
| UIJ64981.1 | NAD(P)-dependent_oxidoreductase_[Bacillus_cereus] | CPTF_Ni         | 1213368.133 | 205555.1379 | 16.94087163 |
| UIJ64981.1 | NAD(P)-dependent_oxidoreductase_[Bacillus_cereus] | CPTF_U          | 503078.2667 | 33542.90933 | 6.667532976 |
| UIJ64981.1 | NAD(P)-dependent_oxidoreductase_[Bacillus_cereus] | CPTF_metals_mix | 1096676.59  | 238230.3746 | 21.7229379  |
| UIJ64981.1 | NAD(P)-dependent_oxidoreductase_[Bacillus_cereus] | CPTF_zcontrol   | 668781.8333 | 468025.2518 | 69.98175316 |
| UIJ64984.1 | nitroreductase_family_protein_[Bacillus_cereus]   | CPTF_Al         | 0           | 0           | 0           |
| UIJ64984.1 | nitroreductase_family_protein_[Bacillus_cereus]   | CPTF_Cd         | 0           | 0           | 0           |

|            |                                                                   |                 |             |             |             |
|------------|-------------------------------------------------------------------|-----------------|-------------|-------------|-------------|
| UIJ64984.1 | nitroreductase_family_protein_[Bacillus_cereus]                   | CPTF_Co         | 0           | 0           | 0           |
| UIJ64984.1 | nitroreductase_family_protein_[Bacillus_cereus]                   | CPTF_Cu         | 18963.43333 | 32845.63002 | 173.2050808 |
| UIJ64984.1 | nitroreductase_family_protein_[Bacillus_cereus]                   | CPTF_Fe         | 0           | 0           | 0           |
| UIJ64984.1 | nitroreductase_family_protein_[Bacillus_cereus]                   | CPTF_Mn         | 0           | 0           | 0           |
| UIJ64984.1 | nitroreductase_family_protein_[Bacillus_cereus]                   | CPTF_Ni         | 20578.33333 | 35642.71887 | 173.2050808 |
| UIJ64984.1 | nitroreductase_family_protein_[Bacillus_cereus]                   | CPTF_U          | 0           | 0           | 0           |
| UIJ64984.1 | nitroreductase_family_protein_[Bacillus_cereus]                   | CPTF_metals_mix | 263063.3    | 20664.13769 | 7.85519595  |
| UIJ64984.1 | nitroreductase_family_protein_[Bacillus_cereus]                   | CPTF_zcontrol   | 0           | 0           | 0           |
| UIJ64987.1 | phosphoenolpyruvate--protein_phosphotransferase_[Bacillus_cereus] | CPTF_Al         | 6323533.593 | 529172.6174 | 8.368305625 |
| UIJ64987.1 | phosphoenolpyruvate--protein_phosphotransferase_[Bacillus_cereus] | CPTF_Cd         | 7323222.6   | 298619.7795 | 4.07770999  |
| UIJ64987.1 | phosphoenolpyruvate--protein_phosphotransferase_[Bacillus_cereus] | CPTF_Co         | 7436929.5   | 671402.3308 | 9.027950726 |
| UIJ64987.1 | phosphoenolpyruvate--protein_phosphotransferase_[Bacillus_cereus] | CPTF_Cu         | 6967903.167 | 529813.4075 | 7.603627588 |
| UIJ64987.1 | phosphoenolpyruvate--protein_phosphotransferase_[Bacillus_cereus] | CPTF_Fe         | 6403866.867 | 869472.6188 | 13.57730629 |
| UIJ64987.1 | phosphoenolpyruvate--protein_phosphotransferase_[Bacillus_cereus] | CPTF_Mn         | 6996408.667 | 1767093.332 | 25.25714858 |
| UIJ64987.1 | phosphoenolpyruvate--protein_phosphotransferase_[Bacillus_cereus] | CPTF_Ni         | 5833394.4   | 1056698.947 | 18.11464946 |
| UIJ64987.1 | phosphoenolpyruvate--protein_phosphotransferase_[Bacillus_cereus] | CPTF_U          | 6176632.533 | 248946.0656 | 4.030449671 |
| UIJ64987.1 | phosphoenolpyruvate--protein_phosphotransferase_[Bacillus_cereus] | CPTF_metals_mix | 12326848.6  | 619989.6294 | 5.029587444 |
| UIJ64987.1 | phosphoenolpyruvate--protein_phosphotransferase_[Bacillus_cereus] | CPTF_zcontrol   | 6534101.867 | 1408498.87  | 21.55612047 |
| UIJ64988.1 | phosphocarrier_protein_HPr_[Bacillus_cereus]                      | CPTF_Al         | 1407996     | 248889.9017 | 17.67688983 |
| UIJ64988.1 | phosphocarrier_protein_HPr_[Bacillus_cereus]                      | CPTF_Cd         | 1813084.667 | 153566.5984 | 8.469907734 |
| UIJ64988.1 | phosphocarrier_protein_HPr_[Bacillus_cereus]                      | CPTF_Co         | 1827132.667 | 248575.1577 | 13.60465839 |
| UIJ64988.1 | phosphocarrier_protein_HPr_[Bacillus_cereus]                      | CPTF_Cu         | 2082582.667 | 266464.966  | 12.79492864 |
| UIJ64988.1 | phosphocarrier_protein_HPr_[Bacillus_cereus]                      | CPTF_Fe         | 1742016.667 | 344136.3291 | 19.75505377 |
| UIJ64988.1 | phosphocarrier_protein_HPr_[Bacillus_cereus]                      | CPTF_Mn         | 1536683     | 946822.5409 | 61.61469483 |
| UIJ64988.1 | phosphocarrier_protein_HPr_[Bacillus_cereus]                      | CPTF_Ni         | 1176853.333 | 455439.9933 | 38.69980909 |
| UIJ64988.1 | phosphocarrier_protein_HPr_[Bacillus_cereus]                      | CPTF_U          | 634546.6667 | 70979.86536 | 11.1859173  |
| UIJ64988.1 | phosphocarrier_protein_HPr_[Bacillus_cereus]                      | CPTF_metals_mix | 3122279.2   | 182479.8027 | 5.844442184 |
| UIJ64988.1 | phosphocarrier_protein_HPr_[Bacillus_cereus]                      | CPTF_zcontrol   | 1422975     | 66575.44225 | 4.67860941  |
| UIJ64989.1 | PTS_glucose_transporter_subunit_IIABC_[Bacillus_cereus]           | CPTF_Al         | 9325593.767 | 910385.6367 | 9.762227044 |
| UIJ64989.1 | PTS_glucose_transporter_subunit_IIABC_[Bacillus_cereus]           | CPTF_Cd         | 10904922.53 | 803150.1927 | 7.365024283 |
| UIJ64989.1 | PTS_glucose_transporter_subunit_IIABC_[Bacillus_cereus]           | CPTF_Co         | 9877523.133 | 334083.1845 | 3.382256665 |
| UIJ64989.1 | PTS_glucose_transporter_subunit_IIABC_[Bacillus_cereus]           | CPTF_Cu         | 8528470.933 | 537930.0278 | 6.307461583 |
| UIJ64989.1 | PTS_glucose_transporter_subunit_IIABC_[Bacillus_cereus]           | CPTF_Fe         | 9782024.367 | 1190096.244 | 12.16615498 |
| UIJ64989.1 | PTS_glucose_transporter_subunit_IIABC_[Bacillus_cereus]           | CPTF_Mn         | 9486456.433 | 1804275.003 | 19.01948337 |
| UIJ64989.1 | PTS_glucose_transporter_subunit_IIABC_[Bacillus_cereus]           | CPTF_Ni         | 6378524.333 | 337354.5455 | 5.288912104 |
| UIJ64989.1 | PTS_glucose_transporter_subunit_IIABC_[Bacillus_cereus]           | CPTF_U          | 7753150.433 | 775925.5071 | 10.00787375 |
| UIJ64989.1 | PTS_glucose_transporter_subunit_IIABC_[Bacillus_cereus]           | CPTF_metals_mix | 11442120.1  | 403258.4151 | 3.524333005 |
| UIJ64989.1 | PTS_glucose_transporter_subunit_IIABC_[Bacillus_cereus]           | CPTF_zcontrol   | 9544188.4   | 1625079.31  | 17.02689891 |
| UIJ64992.1 | glucosamine-6-phosphate_deaminase_[Bacillus_cereus]               | CPTF_Al         | 187909.4333 | 88149.69918 | 46.91073653 |
| UIJ64992.1 | glucosamine-6-phosphate_deaminase_[Bacillus_cereus]               | CPTF_Cd         | 171894.7667 | 40478.81748 | 23.54860376 |
| UIJ64992.1 | glucosamine-6-phosphate_deaminase_[Bacillus_cereus]               | CPTF_Co         | 221300.6667 | 65167.96365 | 29.44770327 |
| UIJ64992.1 | glucosamine-6-phosphate_deaminase_[Bacillus_cereus]               | CPTF_Cu         | 225719.2333 | 29056.15363 | 12.87269729 |
| UIJ64992.1 | glucosamine-6-phosphate_deaminase_[Bacillus_cereus]               | CPTF_Fe         | 160812.7    | 27514.61126 | 17.10972533 |
| UIJ64992.1 | glucosamine-6-phosphate_deaminase_[Bacillus_cereus]               | CPTF_Mn         | 132909.5667 | 66228.46847 | 49.82972267 |
| UIJ64992.1 | glucosamine-6-phosphate_deaminase_[Bacillus_cereus]               | CPTF_Ni         | 92669.53333 | 99502.26464 | 107.373223  |
| UIJ64992.1 | glucosamine-6-phosphate_deaminase_[Bacillus_cereus]               | CPTF_U          | 183489.4333 | 62058.99817 | 33.82156511 |
| UIJ64992.1 | glucosamine-6-phosphate_deaminase_[Bacillus_cereus]               | CPTF_metals_mix | 260514.4    | 81141.81122 | 31.14676625 |
| UIJ64992.1 | glucosamine-6-phosphate_deaminase_[Bacillus_cereus]               | CPTF_zcontrol   | 135642.0667 | 48170.4252  | 35.51289536 |
| UIJ64998.1 | GNAT_family_N-acetyltransferase_RibT_[Bacillus_cereus]            | CPTF_Al         | 60779.86667 | 54225.01345 | 89.21542021 |
| UIJ64998.1 | GNAT_family_N-acetyltransferase_RibT_[Bacillus_cereus]            | CPTF_Cd         | 31433.66667 | 54444.70773 | 173.2050808 |
| UIJ64998.1 | GNAT_family_N-acetyltransferase_RibT_[Bacillus_cereus]            | CPTF_Co         | 61473.16667 | 7262.835513 | 11.81464354 |
| UIJ64998.1 | GNAT_family_N-acetyltransferase_RibT_[Bacillus_cereus]            | CPTF_Cu         | 44895.66667 | 77761.57571 | 173.2050808 |
| UIJ64998.1 | GNAT_family_N-acetyltransferase_RibT_[Bacillus_cereus]            | CPTF_Fe         | 26459.6     | 45829.37155 | 173.2050808 |
| UIJ64998.1 | GNAT_family_N-acetyltransferase_RibT_[Bacillus_cereus]            | CPTF_Mn         | 35967.9     | 34487.30169 | 95.88355642 |
| UIJ64998.1 | GNAT_family_N-acetyltransferase_RibT_[Bacillus_cereus]            | CPTF_Ni         | 29879.93333 | 51753.56266 | 173.2050808 |
| UIJ64998.1 | GNAT_family_N-acetyltransferase_RibT_[Bacillus_cereus]            | CPTF_U          | 0           | 0           | 0           |
| UIJ64998.1 | GNAT_family_N-acetyltransferase_RibT_[Bacillus_cereus]            | CPTF_metals_mix | 29221.26667 | 27270.79675 | 93.32516987 |
| UIJ64998.1 | GNAT_family_N-acetyltransferase_RibT_[Bacillus_cereus]            | CPTF_zcontrol   | 0           | 0           | 0           |
| UIJ64999.1 | peptidylprolyl_isomerase_[Bacillus_cereus]                        | CPTF_Al         | 1914831.067 | 341897.0683 | 17.85520792 |
| UIJ64999.1 | peptidylprolyl_isomerase_[Bacillus_cereus]                        | CPTF_Cd         | 2472164.967 | 154982.6521 | 6.269106399 |
| UIJ64999.1 | peptidylprolyl_isomerase_[Bacillus_cereus]                        | CPTF_Co         | 2202249     | 174250.5343 | 7.912390211 |

|            |                                                                |                 |             |             |              |
|------------|----------------------------------------------------------------|-----------------|-------------|-------------|--------------|
| UIJ64999.1 | peptidylprolyl_isomerase_[Bacillus_cereus]                     | CPTF_Cu         | 2132898.333 | 526237.1609 | 24.67239778  |
| UIJ64999.1 | peptidylprolyl_isomerase_[Bacillus_cereus]                     | CPTF_Fe         | 2202513.233 | 312920.4939 | 14.20742855  |
| UIJ64999.1 | peptidylprolyl_isomerase_[Bacillus_cereus]                     | CPTF_Mn         | 1933267     | 748945.8845 | 38.73990941  |
| UIJ64999.1 | peptidylprolyl_isomerase_[Bacillus_cereus]                     | CPTF_Ni         | 1007322.333 | 315662.6564 | 31.3368071   |
| UIJ64999.1 | peptidylprolyl_isomerase_[Bacillus_cereus]                     | CPTF_U          | 904537.0667 | 347189.8696 | 38.38315559  |
| UIJ64999.1 | peptidylprolyl_isomerase_[Bacillus_cereus]                     | CPTF_metals_mix | 2591227.267 | 88318.5747  | 3.40836853   |
| UIJ64999.1 | peptidylprolyl_isomerase_[Bacillus_cereus]                     | CPTF_zcontrol   | 1604709.567 | 388381.0458 | 24.20257559  |
| UIJ65000.1 | DUF1002_domain-containing_protein_[Bacillus_cereus]            | CPTF_Al         | 0           | 0           | 0            |
| UIJ65000.1 | DUF1002_domain-containing_protein_[Bacillus_cereus]            | CPTF_Cd         | 0           | 0           | 0            |
| UIJ65000.1 | DUF1002_domain-containing_protein_[Bacillus_cereus]            | CPTF_Co         | 0           | 0           | 0            |
| UIJ65000.1 | DUF1002_domain-containing_protein_[Bacillus_cereus]            | CPTF_Cu         | 0           | 0           | 0            |
| UIJ65000.1 | DUF1002_domain-containing_protein_[Bacillus_cereus]            | CPTF_Fe         | 0           | 0           | 0            |
| UIJ65000.1 | DUF1002_domain-containing_protein_[Bacillus_cereus]            | CPTF_Mn         | 0           | 0           | 0            |
| UIJ65000.1 | DUF1002_domain-containing_protein_[Bacillus_cereus]            | CPTF_Ni         | 0           | 0           | 0            |
| UIJ65000.1 | DUF1002_domain-containing_protein_[Bacillus_cereus]            | CPTF_U          | 0           | 0           | 0            |
| UIJ65000.1 | DUF1002_domain-containing_protein_[Bacillus_cereus]            | CPTF_metals_mix | 152435.6667 | 37456.63482 | 24.57209369  |
| UIJ65000.1 | DUF1002_domain-containing_protein_[Bacillus_cereus]            | CPTF_zcontrol   | 0           | 0           | 0            |
| UIJ65009.1 | RNA_polymerase_sporulation_sigma_factor_SigF_[Bacillus_cereus] | CPTF_Al         | 81606.53333 | 44664.74912 | 54.73183003  |
| UIJ65009.1 | RNA_polymerase_sporulation_sigma_factor_SigF_[Bacillus_cereus] | CPTF_Cd         | 142774.8333 | 95227.86708 | 66.69793608  |
| UIJ65009.1 | RNA_polymerase_sporulation_sigma_factor_SigF_[Bacillus_cereus] | CPTF_Co         | 99210.3     | 112559.4942 | 113.45454519 |
| UIJ65009.1 | RNA_polymerase_sporulation_sigma_factor_SigF_[Bacillus_cereus] | CPTF_Cu         | 47395.76667 | 32626.19878 | 68.83779096  |
| UIJ65009.1 | RNA_polymerase_sporulation_sigma_factor_SigF_[Bacillus_cereus] | CPTF_Fe         | 120899.2333 | 95006.82118 | 78.58347697  |
| UIJ65009.1 | RNA_polymerase_sporulation_sigma_factor_SigF_[Bacillus_cereus] | CPTF_Mn         | 71344.33333 | 123572.0102 | 173.2050808  |
| UIJ65009.1 | RNA_polymerase_sporulation_sigma_factor_SigF_[Bacillus_cereus] | CPTF_Ni         | 48173.46667 | 32446.00203 | 67.35243335  |
| UIJ65009.1 | RNA_polymerase_sporulation_sigma_factor_SigF_[Bacillus_cereus] | CPTF_U          | 89466.33333 | 96504.70018 | 107.8670563  |
| UIJ65009.1 | RNA_polymerase_sporulation_sigma_factor_SigF_[Bacillus_cereus] | CPTF_metals_mix | 39659.26667 | 55724.26771 | 140.5075595  |
| UIJ65009.1 | RNA_polymerase_sporulation_sigma_factor_SigF_[Bacillus_cereus] | CPTF_zcontrol   | 14486.4     | 25091.18082 | 173.2050808  |
| UIJ65018.1 | MarR_family_transcriptional_regulator_[Bacillus_cereus]        | CPTF_Al         | 0           | 0           | 0            |
| UIJ65018.1 | MarR_family_transcriptional_regulator_[Bacillus_cereus]        | CPTF_Cd         | 0           | 0           | 0            |
| UIJ65018.1 | MarR_family_transcriptional_regulator_[Bacillus_cereus]        | CPTF_Co         | 0           | 0           | 0            |
| UIJ65018.1 | MarR_family_transcriptional_regulator_[Bacillus_cereus]        | CPTF_Cu         | 0           | 0           | 0            |
| UIJ65018.1 | MarR_family_transcriptional_regulator_[Bacillus_cereus]        | CPTF_Fe         | 0           | 0           | 0            |
| UIJ65018.1 | MarR_family_transcriptional_regulator_[Bacillus_cereus]        | CPTF_Mn         | 0           | 0           | 0            |
| UIJ65018.1 | MarR_family_transcriptional_regulator_[Bacillus_cereus]        | CPTF_Ni         | 0           | 0           | 0            |
| UIJ65018.1 | MarR_family_transcriptional_regulator_[Bacillus_cereus]        | CPTF_U          | 0           | 0           | 0            |
| UIJ65018.1 | MarR_family_transcriptional_regulator_[Bacillus_cereus]        | CPTF_metals_mix | 33480.66667 | 57990.21574 | 173.2050808  |
| UIJ65018.1 | MarR_family_transcriptional_regulator_[Bacillus_cereus]        | CPTF_zcontrol   | 0           | 0           | 0            |
| UIJ65022.1 | pyrimidine-nucleoside_phosphorylase_[Bacillus_cereus]          | CPTF_Al         | 101911.0333 | 81535.73059 | 80.00677446  |
| UIJ65022.1 | pyrimidine-nucleoside_phosphorylase_[Bacillus_cereus]          | CPTF_Cd         | 97065.6     | 63628.10603 | 65.55165376  |
| UIJ65022.1 | pyrimidine-nucleoside_phosphorylase_[Bacillus_cereus]          | CPTF_Co         | 52619.1     | 51036.00445 | 96.99140511  |
| UIJ65022.1 | pyrimidine-nucleoside_phosphorylase_[Bacillus_cereus]          | CPTF_Cu         | 83276.86667 | 40581.41954 | 48.73072339  |
| UIJ65022.1 | pyrimidine-nucleoside_phosphorylase_[Bacillus_cereus]          | CPTF_Fe         | 71659.5     | 48637.15774 | 67.87258876  |
| UIJ65022.1 | pyrimidine-nucleoside_phosphorylase_[Bacillus_cereus]          | CPTF_Mn         | 14820.23333 | 12874.97165 | 86.87428438  |
| UIJ65022.1 | pyrimidine-nucleoside_phosphorylase_[Bacillus_cereus]          | CPTF_Ni         | 86742.9     | 86299.36843 | 99.48868257  |
| UIJ65022.1 | pyrimidine-nucleoside_phosphorylase_[Bacillus_cereus]          | CPTF_U          | 42008.86667 | 36830.74752 | 87.6737471   |
| UIJ65022.1 | pyrimidine-nucleoside_phosphorylase_[Bacillus_cereus]          | CPTF_metals_mix | 449706.4333 | 173138.939  | 38.50043633  |
| UIJ65022.1 | pyrimidine-nucleoside_phosphorylase_[Bacillus_cereus]          | CPTF_zcontrol   | 28075.2     | 27955.03496 | 99.57198867  |
| UIJ65023.1 | purine-nucleoside_phosphorylase_[Bacillus_cereus]              | CPTF_Al         | 14354.6     | 24862.89652 | 173.2050808  |
| UIJ65023.1 | purine-nucleoside_phosphorylase_[Bacillus_cereus]              | CPTF_Cd         | 48044       | 83214.649   | 173.2050808  |
| UIJ65023.1 | purine-nucleoside_phosphorylase_[Bacillus_cereus]              | CPTF_Co         | 29770.5     | 51564.01857 | 173.2050808  |
| UIJ65023.1 | purine-nucleoside_phosphorylase_[Bacillus_cereus]              | CPTF_Cu         | 44374.66667 | 76859.17724 | 173.2050808  |
| UIJ65023.1 | purine-nucleoside_phosphorylase_[Bacillus_cereus]              | CPTF_Fe         | 0           | 0           | 0            |
| UIJ65023.1 | purine-nucleoside_phosphorylase_[Bacillus_cereus]              | CPTF_Mn         | 46024.76667 | 42010.07086 | 91.27709688  |
| UIJ65023.1 | purine-nucleoside_phosphorylase_[Bacillus_cereus]              | CPTF_Ni         | 0           | 0           | 0            |
| UIJ65023.1 | purine-nucleoside_phosphorylase_[Bacillus_cereus]              | CPTF_U          | 0           | 0           | 0            |
| UIJ65023.1 | purine-nucleoside_phosphorylase_[Bacillus_cereus]              | CPTF_metals_mix | 347870.3333 | 27157.62104 | 7.806822955  |
| UIJ65023.1 | purine-nucleoside_phosphorylase_[Bacillus_cereus]              | CPTF_zcontrol   | 10266.93333 | 17782.85017 | 173.2050808  |
| UIJ65024.1 | phosphopentomutase_[Bacillus_cereus]                           | CPTF_Al         | 1495075.233 | 202244.254  | 13.527363    |
| UIJ65024.1 | phosphopentomutase_[Bacillus_cereus]                           | CPTF_Cd         | 1688566.9   | 304443.7288 | 18.0297108   |
| UIJ65024.1 | phosphopentomutase_[Bacillus_cereus]                           | CPTF_Co         | 1471028.667 | 413663.2954 | 28.12068213  |
| UIJ65024.1 | phosphopentomutase_[Bacillus_cereus]                           | CPTF_Cu         | 1104910.867 | 302144.018  | 27.34555584  |

|            |                                                   |                 |             |             |             |
|------------|---------------------------------------------------|-----------------|-------------|-------------|-------------|
| UIJ65024.1 | phosphopentomutase [Bacillus cereus]              | CPTF_Fe         | 1353938.133 | 133230.3559 | 9.840210021 |
| UIJ65024.1 | phosphopentomutase [Bacillus cereus]              | CPTF_Mn         | 1429903     | 211423.2556 | 14.785846   |
| UIJ65024.1 | phosphopentomutase [Bacillus cereus]              | CPTF_Ni         | 1409123.867 | 24333.30053 | 1.726839003 |
| UIJ65024.1 | phosphopentomutase [Bacillus cereus]              | CPTF_U          | 1775822.933 | 59645.92203 | 3.358776425 |
| UIJ65024.1 | phosphopentomutase [Bacillus cereus]              | CPTF_metals_mix | 1740534.133 | 113049.537  | 6.495106005 |
| UIJ65024.1 | phosphopentomutase [Bacillus cereus]              | CPTF_zcontrol   | 1535224.533 | 185664.0862 | 12.09361121 |
| UIJ65025.1 | FixH_family_protein [Bacillus cereus]             | CPTF_Al         | 501451.3333 | 119342.087  | 23.79933587 |
| UIJ65025.1 | FixH_family_protein [Bacillus cereus]             | CPTF_Cd         | 338214.6667 | 328762.9055 | 97.20539584 |
| UIJ65025.1 | FixH_family_protein [Bacillus cereus]             | CPTF_Co         | 147718.3333 | 128305.3645 | 86.85811816 |
| UIJ65025.1 | FixH_family_protein [Bacillus cereus]             | CPTF_Cu         | 327050.6667 | 63922.29051 | 19.54507268 |
| UIJ65025.1 | FixH_family_protein [Bacillus cereus]             | CPTF_Fe         | 0           | 0           | 0           |
| UIJ65025.1 | FixH_family_protein [Bacillus cereus]             | CPTF_Mn         | 142086.6667 | 135552.2464 | 95.40110245 |
| UIJ65025.1 | FixH_family_protein [Bacillus cereus]             | CPTF_Ni         | 233322.6667 | 35638.74805 | 15.27444742 |
| UIJ65025.1 | FixH_family_protein [Bacillus cereus]             | CPTF_U          | 0           | 0           | 0           |
| UIJ65025.1 | FixH_family_protein [Bacillus cereus]             | CPTF_metals_mix | 1039380.967 | 344004.5534 | 33.09706108 |
| UIJ65025.1 | FixH_family_protein [Bacillus cereus]             | CPTF_zcontrol   | 0           | 0           | 0           |
| UIJ65028.1 | transcriptional_repressor [Bacillus cereus]       | CPTF_Al         | 441360.3    | 48982.15813 | 11.09799819 |
| UIJ65028.1 | transcriptional_repressor [Bacillus cereus]       | CPTF_Cd         | 529725.6667 | 121644.5714 | 22.96369215 |
| UIJ65028.1 | transcriptional_repressor [Bacillus cereus]       | CPTF_Co         | 460740.6667 | 80961.17356 | 17.57196172 |
| UIJ65028.1 | transcriptional_repressor [Bacillus cereus]       | CPTF_Cu         | 433360.7    | 82753.3972  | 19.09573185 |
| UIJ65028.1 | transcriptional_repressor [Bacillus cereus]       | CPTF_Fe         | 456114      | 80234.54663 | 17.59089759 |
| UIJ65028.1 | transcriptional_repressor [Bacillus cereus]       | CPTF_Mn         | 315035.3333 | 172519.142  | 54.76183898 |
| UIJ65028.1 | transcriptional_repressor [Bacillus cereus]       | CPTF_Ni         | 436370.6667 | 50078.8631  | 11.47622123 |
| UIJ65028.1 | transcriptional_repressor [Bacillus cereus]       | CPTF_U          | 328480.6667 | 99195.17698 | 30.19817817 |
| UIJ65028.1 | transcriptional_repressor [Bacillus cereus]       | CPTF_metals_mix | 1069407.333 | 309620.1394 | 28.95249824 |
| UIJ65028.1 | transcriptional_repressor [Bacillus cereus]       | CPTF_zcontrol   | 390484.0667 | 63003.37838 | 16.13468609 |
| UIJ65030.1 | GNAT_family_N-acetyltransferase [Bacillus cereus] | CPTF_Al         | 202924.2667 | 137961.1558 | 67.98652427 |
| UIJ65030.1 | GNAT_family_N-acetyltransferase [Bacillus cereus] | CPTF_Cd         | 5972.9      | 10345.36627 | 173.2050808 |
| UIJ65030.1 | GNAT_family_N-acetyltransferase [Bacillus cereus] | CPTF_Co         | 443683.7333 | 55710.26842 | 12.55630176 |
| UIJ65030.1 | GNAT_family_N-acetyltransferase [Bacillus cereus] | CPTF_Cu         | 452565.5333 | 85823.19229 | 18.96370492 |
| UIJ65030.1 | GNAT_family_N-acetyltransferase [Bacillus cereus] | CPTF_Fe         | 127213.1    | 104702.5988 | 82.30488749 |
| UIJ65030.1 | GNAT_family_N-acetyltransferase [Bacillus cereus] | CPTF_Mn         | 99145.96667 | 47971.38797 | 48.38460865 |
| UIJ65030.1 | GNAT_family_N-acetyltransferase [Bacillus cereus] | CPTF_Ni         | 519077.6667 | 82316.75362 | 15.85827303 |
| UIJ65030.1 | GNAT_family_N-acetyltransferase [Bacillus cereus] | CPTF_U          | 86027.7     | 113109.9108 | 131.480803  |
| UIJ65030.1 | GNAT_family_N-acetyltransferase [Bacillus cereus] | CPTF_metals_mix | 588680.4667 | 104378.9244 | 17.73099845 |
| UIJ65030.1 | GNAT_family_N-acetyltransferase [Bacillus cereus] | CPTF_zcontrol   | 100561.6667 | 174177.916  | 173.2050808 |
| UIJ65031.1 | NUDIX_hydrolase [Bacillus cereus]                 | CPTF_Al         | 1289518.5   | 391367.0028 | 30.34985561 |
| UIJ65031.1 | NUDIX_hydrolase [Bacillus cereus]                 | CPTF_Cd         | 1402269.667 | 484540.947  | 34.55404894 |
| UIJ65031.1 | NUDIX_hydrolase [Bacillus cereus]                 | CPTF_Co         | 1451931.1   | 218063.8147 | 15.01888173 |
| UIJ65031.1 | NUDIX_hydrolase [Bacillus cereus]                 | CPTF_Cu         | 1575502.333 | 11808.76714 | 0.749523938 |
| UIJ65031.1 | NUDIX_hydrolase [Bacillus cereus]                 | CPTF_Fe         | 1532855.6   | 86144.6774  | 5.619882094 |
| UIJ65031.1 | NUDIX_hydrolase [Bacillus cereus]                 | CPTF_Mn         | 1473247.667 | 415420.4523 | 28.19759785 |
| UIJ65031.1 | NUDIX_hydrolase [Bacillus cereus]                 | CPTF_Ni         | 1238918.267 | 210092.7546 | 16.95775744 |
| UIJ65031.1 | NUDIX_hydrolase [Bacillus cereus]                 | CPTF_U          | 1149311.667 | 404276.8667 | 35.17556451 |
| UIJ65031.1 | NUDIX_hydrolase [Bacillus cereus]                 | CPTF_metals_mix | 1559763.333 | 24300.21941 | 1.557942727 |
| UIJ65031.1 | NUDIX_hydrolase [Bacillus cereus]                 | CPTF_zcontrol   | 1441934.9   | 341342.7977 | 23.6725526  |
| UIJ65033.1 | aldo/keto_reductase [Bacillus cereus]             | CPTF_Al         | 0           | 0           | 0           |
| UIJ65033.1 | aldo/keto_reductase [Bacillus cereus]             | CPTF_Cd         | 0           | 0           | 0           |
| UIJ65033.1 | aldo/keto_reductase [Bacillus cereus]             | CPTF_Co         | 0           | 0           | 0           |
| UIJ65033.1 | aldo/keto_reductase [Bacillus cereus]             | CPTF_Cu         | 30955.26667 | 53616.09463 | 173.2050808 |
| UIJ65033.1 | aldo/keto_reductase [Bacillus cereus]             | CPTF_Fe         | 0           | 0           | 0           |
| UIJ65033.1 | aldo/keto_reductase [Bacillus cereus]             | CPTF_Mn         | 92171       | 88479.8471  | 95.99532076 |
| UIJ65033.1 | aldo/keto_reductase [Bacillus cereus]             | CPTF_Ni         | 0           | 0           | 0           |
| UIJ65033.1 | aldo/keto_reductase [Bacillus cereus]             | CPTF_U          | 0           | 0           | 0           |
| UIJ65033.1 | aldo/keto_reductase [Bacillus cereus]             | CPTF_metals_mix | 195590      | 21104.72504 | 10.79028838 |
| UIJ65033.1 | aldo/keto_reductase [Bacillus cereus]             | CPTF_zcontrol   | 0           | 0           | 0           |
| UIJ65034.1 | aldo/keto_reductase [Bacillus cereus]             | CPTF_Al         | 166069      | 15651.97036 | 9.424980192 |
| UIJ65034.1 | aldo/keto_reductase [Bacillus cereus]             | CPTF_Cd         | 129213.6667 | 16339.40851 | 12.64526341 |
| UIJ65034.1 | aldo/keto_reductase [Bacillus cereus]             | CPTF_Co         | 141552.3333 | 14854.71162 | 10.49414819 |
| UIJ65034.1 | aldo/keto_reductase [Bacillus cereus]             | CPTF_Cu         | 195926.3333 | 6487.230251 | 3.311055814 |
| UIJ65034.1 | aldo/keto_reductase [Bacillus cereus]             | CPTF_Fe         | 92590.93333 | 28406.26821 | 30.67931944 |

|            |                                                                                                                                             |                 |             |             |             |
|------------|---------------------------------------------------------------------------------------------------------------------------------------------|-----------------|-------------|-------------|-------------|
| UIJ65034.1 | aldo/keto_reductase [Bacillus cereus]                                                                                                       | CPTF_Mn         | 117217      | 12981.59039 | 11.07483589 |
| UIJ65034.1 | aldo/keto_reductase [Bacillus cereus]                                                                                                       | CPTF_Ni         | 62044.93333 | 54908.98748 | 88.49874523 |
| UIJ65034.1 | aldo/keto_reductase [Bacillus cereus]                                                                                                       | CPTF_U          | 193673.3333 | 140461.9775 | 72.52520266 |
| UIJ65034.1 | aldo/keto_reductase [Bacillus cereus]                                                                                                       | CPTF_metals_mix | 166201.6667 | 82946.13443 | 49.90692097 |
| UIJ65034.1 | aldo/keto_reductase [Bacillus cereus]                                                                                                       | CPTF_zcontrol   | 100643.9667 | 43291.3641  | 43.01436592 |
| UIJ65035.1 | YqkE_family_protein [Bacillus cereus]                                                                                                       | CPTF_Al         | 0           | 0           | 0           |
| UIJ65035.1 | YqkE_family_protein [Bacillus cereus]                                                                                                       | CPTF_Cd         | 6551.4      | 11347.35766 | 173.2050808 |
| UIJ65035.1 | YqkE_family_protein [Bacillus cereus]                                                                                                       | CPTF_Co         | 11169.56667 | 19346.25697 | 173.2050808 |
| UIJ65035.1 | YqkE_family_protein [Bacillus cereus]                                                                                                       | CPTF_Cu         | 0           | 0           | 0           |
| UIJ65035.1 | YqkE_family_protein [Bacillus cereus]                                                                                                       | CPTF_Fe         | 0           | 0           | 0           |
| UIJ65035.1 | YqkE_family_protein [Bacillus cereus]                                                                                                       | CPTF_Mn         | 0           | 0           | 0           |
| UIJ65035.1 | YqkE_family_protein [Bacillus cereus]                                                                                                       | CPTF_Ni         | 0           | 0           | 0           |
| UIJ65035.1 | YqkE_family_protein [Bacillus cereus]                                                                                                       | CPTF_U          | 0           | 0           | 0           |
| UIJ65035.1 | YqkE_family_protein [Bacillus cereus]                                                                                                       | CPTF_metals_mix | 29337.83333 | 35175.10564 | 119.8967396 |
| UIJ65035.1 | YqkE_family_protein [Bacillus cereus]                                                                                                       | CPTF_zcontrol   | 0           | 0           | 0           |
| UIJ65036.1 | 5'-nucleotidase_C-terminal_domain-containing_protein [Bacillus cereus]                                                                      | CPTF_Al         | 855897.2    | 186854.0216 | 21.83136265 |
| UIJ65036.1 | 5'-nucleotidase_C-terminal_domain-containing_protein [Bacillus cereus]                                                                      | CPTF_Cd         | 856333.8333 | 145644.2365 | 17.00788067 |
| UIJ65036.1 | 5'-nucleotidase_C-terminal_domain-containing_protein [Bacillus cereus]                                                                      | CPTF_Co         | 856825.7667 | 152505.6438 | 17.79890962 |
| UIJ65036.1 | 5'-nucleotidase_C-terminal_domain-containing_protein [Bacillus cereus]                                                                      | CPTF_Cu         | 160633.0667 | 259399.9183 | 161.4860027 |
| UIJ65036.1 | 5'-nucleotidase_C-terminal_domain-containing_protein [Bacillus cereus]                                                                      | CPTF_Fe         | 392821      | 503555.2005 | 128.1894808 |
| UIJ65036.1 | 5'-nucleotidase_C-terminal_domain-containing_protein [Bacillus cereus]                                                                      | CPTF_Mn         | 447020.0667 | 388576.2781 | 86.92591386 |
| UIJ65036.1 | 5'-nucleotidase_C-terminal_domain-containing_protein [Bacillus cereus]                                                                      | CPTF_Ni         | 609425.1    | 380931.4849 | 62.50669441 |
| UIJ65036.1 | 5'-nucleotidase_C-terminal_domain-containing_protein [Bacillus cereus]                                                                      | CPTF_U          | 634829.5333 | 330200.467  | 52.01403679 |
| UIJ65036.1 | 5'-nucleotidase_C-terminal_domain-containing_protein [Bacillus cereus]                                                                      | CPTF_metals_mix | 142681.5667 | 162478.152  | 113.8746622 |
| UIJ65036.1 | 5'-nucleotidase_C-terminal_domain-containing_protein [Bacillus cereus]                                                                      | CPTF_zcontrol   | 1022879.933 | 163095.0242 | 15.944689   |
| UIJ65044.1 | CDGSH_iron-sulfur_domain-containing_protein [Bacillus cereus]                                                                               | CPTF_Al         | 40524.26667 | 41704.36464 | 102.9120773 |
| UIJ65044.1 | CDGSH_iron-sulfur_domain-containing_protein [Bacillus cereus]                                                                               | CPTF_Cd         | 0           | 0           | 0           |
| UIJ65044.1 | CDGSH_iron-sulfur_domain-containing_protein [Bacillus cereus]                                                                               | CPTF_Co         | 56506.2     | 65716.43196 | 116.2995609 |
| UIJ65044.1 | CDGSH_iron-sulfur_domain-containing_protein [Bacillus cereus]                                                                               | CPTF_Cu         | 0           | 0           | 0           |
| UIJ65044.1 | CDGSH_iron-sulfur_domain-containing_protein [Bacillus cereus]                                                                               | CPTF_Fe         | 92821       | 80643.65803 | 86.88083304 |
| UIJ65044.1 | CDGSH_iron-sulfur_domain-containing_protein [Bacillus cereus]                                                                               | CPTF_Mn         | 53322.3     | 46944.32476 | 88.03882196 |
| UIJ65044.1 | CDGSH_iron-sulfur_domain-containing_protein [Bacillus cereus]                                                                               | CPTF_Ni         | 0           | 0           | 0           |
| UIJ65044.1 | CDGSH_iron-sulfur_domain-containing_protein [Bacillus cereus]                                                                               | CPTF_U          | 0           | 0           | 0           |
| UIJ65044.1 | CDGSH_iron-sulfur_domain-containing_protein [Bacillus cereus]                                                                               | CPTF_metals_mix | 19066.93333 | 20686.83054 | 108.4958455 |
| UIJ65044.1 | CDGSH_iron-sulfur_domain-containing_protein [Bacillus cereus]                                                                               | CPTF_zcontrol   | 38374.2     | 38267.00425 | 99.72065672 |
| UIJ65045.1 | bifunctional_diaminohydroxyphosphoribosylaminopyrimidine_deaminase/5-amino-6-(5-phosphoribosylamino)uracil_reductase_RibD [Bacillus cereus] | CPTF_Al         | 4564.866667 | 7906.580996 | 173.2050808 |
| UIJ65045.1 | bifunctional_diaminohydroxyphosphoribosylaminopyrimidine_deaminase/5-amino-6-(5-phosphoribosylamino)uracil_reductase_RibD [Bacillus cereus] | CPTF_Cd         | 3357.2      | 5814.840971 | 173.2050808 |
| UIJ65045.1 | bifunctional_diaminohydroxyphosphoribosylaminopyrimidine_deaminase/5-amino-6-(5-phosphoribosylamino)uracil_reductase_RibD [Bacillus cereus] | CPTF_Co         | 0           | 0           | 0           |
| UIJ65045.1 | bifunctional_diaminohydroxyphosphoribosylaminopyrimidine_deaminase/5-amino-6-(5-phosphoribosylamino)uracil_reductase_RibD [Bacillus cereus] | CPTF_Cu         | 10957.33333 | 18978.65805 | 173.2050808 |
| UIJ65045.1 | bifunctional_diaminohydroxyphosphoribosylaminopyrimidine_deaminase/5-amino-6-(5-phosphoribosylamino)uracil_reductase_RibD [Bacillus cereus] | CPTF_Fe         | 5989.733333 | 10374.52246 | 173.2050808 |
| UIJ65045.1 | bifunctional_diaminohydroxyphosphoribosylaminopyrimidine_deaminase/5-amino-6-(5-phosphoribosylamino)uracil_reductase_RibD [Bacillus cereus] | CPTF_Mn         | 5919.7      | 10253.22117 | 173.2050808 |
| UIJ65045.1 | bifunctional_diaminohydroxyphosphoribosylaminopyrimidine_deaminase/5-amino-6-(5-phosphoribosylamino)uracil_reductase_RibD [Bacillus cereus] | CPTF_Ni         | 5509.5      | 9542.733924 | 173.2050808 |
| UIJ65045.1 | bifunctional_diaminohydroxyphosphoribosylaminopyrimidine_deaminase/5-amino-6-(5-phosphoribosylamino)uracil_reductase_RibD [Bacillus cereus] | CPTF_U          | 0           | 0           | 0           |
| UIJ65045.1 | bifunctional_diaminohydroxyphosphoribosylaminopyrimidine_deaminase/5-amino-6-(5-phosphoribosylamino)uracil_reductase_RibD [Bacillus cereus] | CPTF_metals_mix | 22429.46667 | 12966.24605 | 57.80898067 |
| UIJ65045.1 | bifunctional_diaminohydroxyphosphoribosylaminopyrimidine_deaminase/5-amino-6-(5-phosphoribosylamino)uracil_reductase_RibD [Bacillus cereus] | CPTF_zcontrol   | 0           | 0           | 0           |
| UIJ65047.1 | bifunctional_3,4-dihydroxy-2-butanone_4-phosphate_synthase/GTP_cyclohydrolase_II [Bacillus cereus]                                          | CPTF_Al         | 376997.3333 | 236833.8472 | 62.82109349 |
| UIJ65047.1 | bifunctional_3,4-dihydroxy-2-butanone_4-phosphate_synthase/GTP_cyclohydrolase_II [Bacillus cereus]                                          | CPTF_Cd         | 351552.3333 | 176563.353  | 50.22391725 |
| UIJ65047.1 | bifunctional_3,4-dihydroxy-2-butanone_4-phosphate_synthase/GTP_cyclohydrolase_II [Bacillus cereus]                                          | CPTF_Co         | 318859.4333 | 30270.7054  | 9.493432603 |
| UIJ65047.1 | bifunctional_3,4-dihydroxy-2-butanone_4-phosphate_synthase/GTP_cyclohydrolase_II [Bacillus cereus]                                          | CPTF_Cu         | 272149      | 10231.40171 | 3.759485323 |
| UIJ65047.1 | bifunctional_3,4-dihydroxy-2-butanone_4-phosphate_synthase/GTP_cyclohydrolase_II [Bacillus cereus]                                          | CPTF_Fe         | 271603.5667 | 220359.708  | 81.13284765 |
| UIJ65047.1 | bifunctional_3,4-dihydroxy-2-butanone_4-phosphate_synthase/GTP_cyclohydrolase_II [Bacillus cereus]                                          | CPTF_Mn         | 183861.8    | 143177.5069 | 77.87235133 |
| UIJ65047.1 | bifunctional_3,4-dihydroxy-2-butanone_4-phosphate_synthase/GTP_cyclohydrolase_II [Bacillus cereus]                                          | CPTF_Ni         | 350694      | 414286.713  | 118.1333907 |
| UIJ65047.1 | bifunctional_3,4-dihydroxy-2-butanone_4-phosphate_synthase/GTP_cyclohydrolase_II [Bacillus cereus]                                          | CPTF_U          | 534281.8333 | 226359.0844 | 42.3669813  |
| UIJ65047.1 | bifunctional_3,4-dihydroxy-2-butanone_4-phosphate_synthase/GTP_cyclohydrolase_II [Bacillus cereus]                                          | CPTF_metals_mix | 568401.2    | 142217.7649 | 25.02066585 |
| UIJ65047.1 | bifunctional_3,4-dihydroxy-2-butanone_4-phosphate_synthase/GTP_cyclohydrolase_II [Bacillus cereus]                                          | CPTF_zcontrol   | 76103.8     | 68507.52328 | 90.01853163 |
| UIJ65048.1 | 6,7-dimethyl-8-ribityllumazine_synthase [Bacillus cereus]                                                                                   | CPTF_Al         | 637020.6    | 17900.60005 | 2.810050421 |
| UIJ65048.1 | 6,7-dimethyl-8-ribityllumazine_synthase [Bacillus cereus]                                                                                   | CPTF_Cd         | 726122.9    | 69121.63451 | 9.519274837 |
| UIJ65048.1 | 6,7-dimethyl-8-ribityllumazine_synthase [Bacillus cereus]                                                                                   | CPTF_Co         | 541374.6667 | 115314.0884 | 21.30023724 |
| UIJ65048.1 | 6,7-dimethyl-8-ribityllumazine_synthase [Bacillus cereus]                                                                                   | CPTF_Cu         | 576377.6667 | 80525.81038 | 13.97101502 |
| UIJ65048.1 | 6,7-dimethyl-8-ribityllumazine_synthase [Bacillus cereus]                                                                                   | CPTF_Fe         | 479535.3333 | 90517.90684 | 18.87617044 |
| UIJ65048.1 | 6,7-dimethyl-8-ribityllumazine_synthase [Bacillus cereus]                                                                                   | CPTF_Mn         | 514556.9333 | 134082.6209 | 26.05787858 |

|            |                                                                                                |                 |             |             |             |
|------------|------------------------------------------------------------------------------------------------|-----------------|-------------|-------------|-------------|
| UIJ65048.1 | 6,7-dimethyl-8-ribityllumazine_synthase [Bacillus_cereus]                                      | CPTF_Ni         | 455639.1667 | 215776.1044 | 47.35679462 |
| UIJ65048.1 | 6,7-dimethyl-8-ribityllumazine_synthase [Bacillus_cereus]                                      | CPTF_U          | 248273.9667 | 123048.5024 | 49.56158073 |
| UIJ65048.1 | 6,7-dimethyl-8-ribityllumazine_synthase [Bacillus_cereus]                                      | CPTF_metals_mix | 1069919.9   | 162028.1184 | 15.14394847 |
| UIJ65048.1 | 6,7-dimethyl-8-ribityllumazine_synthase [Bacillus_cereus]                                      | CPTF_zcontrol   | 484154.5    | 27950.88688 | 5.773133757 |
| UIJ65056.1 | hypothetical_protein_LW858_19100 [Bacillus_cereus]                                             | CPTF_Al         | 910000      | 1576166.235 | 173.2050808 |
| UIJ65056.1 | hypothetical_protein_LW858_19100 [Bacillus_cereus]                                             | CPTF_Cd         | 0           | 0           | 0           |
| UIJ65056.1 | hypothetical_protein_LW858_19100 [Bacillus_cereus]                                             | CPTF_Co         | 900000      | 780448.589  | 86.71650988 |
| UIJ65056.1 | hypothetical_protein_LW858_19100 [Bacillus_cereus]                                             | CPTF_Cu         | 0           | 0           | 0           |
| UIJ65056.1 | hypothetical_protein_LW858_19100 [Bacillus_cereus]                                             | CPTF_Fe         | 0           | 0           | 0           |
| UIJ65056.1 | hypothetical_protein_LW858_19100 [Bacillus_cereus]                                             | CPTF_Mn         | 590000      | 1021909.976 | 173.2050808 |
| UIJ65056.1 | hypothetical_protein_LW858_19100 [Bacillus_cereus]                                             | CPTF_Ni         | 251418      | 435468.7499 | 173.2050808 |
| UIJ65056.1 | hypothetical_protein_LW858_19100 [Bacillus_cereus]                                             | CPTF_U          | 533333.3333 | 923760.4307 | 173.2050808 |
| UIJ65056.1 | hypothetical_protein_LW858_19100 [Bacillus_cereus]                                             | CPTF_metals_mix | 640055.3333 | 554304.885  | 86.60265076 |
| UIJ65056.1 | hypothetical_protein_LW858_19100 [Bacillus_cereus]                                             | CPTF_zcontrol   | 933333.3333 | 873059.7536 | 93.54211646 |
| UIJ65058.1 | bifunctional_2',3'-cyclic-nucleotide_2'-phosphodiesterase/3'-nucleotidase [Bacillus_cereus]    | CPTF_Al         | 1066831.167 | 370539.7426 | 34.73274443 |
| UIJ65058.1 | bifunctional_2',3'-cyclic-nucleotide_2'-phosphodiesterase/3'-nucleotidase [Bacillus_cereus]    | CPTF_Cd         | 849313.7667 | 442355.5589 | 52.08387951 |
| UIJ65058.1 | bifunctional_2',3'-cyclic-nucleotide_2'-phosphodiesterase/3'-nucleotidase [Bacillus_cereus]    | CPTF_Co         | 779506.8667 | 214222.4881 | 27.48179615 |
| UIJ65058.1 | bifunctional_2',3'-cyclic-nucleotide_2'-phosphodiesterase/3'-nucleotidase [Bacillus_cereus]    | CPTF_Cu         | 526670.9333 | 173339.5082 | 32.91229821 |
| UIJ65058.1 | bifunctional_2',3'-cyclic-nucleotide_2'-phosphodiesterase/3'-nucleotidase [Bacillus_cereus]    | CPTF_Fe         | 1254838.6   | 236516.1989 | 18.84833626 |
| UIJ65058.1 | bifunctional_2',3'-cyclic-nucleotide_2'-phosphodiesterase/3'-nucleotidase [Bacillus_cereus]    | CPTF_Mn         | 609596.4    | 322558.963  | 52.9135282  |
| UIJ65058.1 | bifunctional_2',3'-cyclic-nucleotide_2'-phosphodiesterase/3'-nucleotidase [Bacillus_cereus]    | CPTF_Ni         | 935073.3    | 602280.2633 | 64.40995196 |
| UIJ65058.1 | bifunctional_2',3'-cyclic-nucleotide_2'-phosphodiesterase/3'-nucleotidase [Bacillus_cereus]    | CPTF_U          | 1486053.5   | 213594.8723 | 14.37329627 |
| UIJ65058.1 | bifunctional_2',3'-cyclic-nucleotide_2'-phosphodiesterase/3'-nucleotidase [Bacillus_cereus]    | CPTF_metals_mix | 342871.4    | 319301.2815 | 93.12566797 |
| UIJ65058.1 | bifunctional_2',3'-cyclic-nucleotide_2'-phosphodiesterase/3'-nucleotidase [Bacillus_cereus]    | CPTF_zcontrol   | 1088830.3   | 300740.523  | 27.62051377 |
| UIJ65063.1 | ornithine_carbamoyltransferase [Bacillus_cereus]                                               | CPTF_Al         | 1699119.133 | 467478.7875 | 27.51300826 |
| UIJ65063.1 | ornithine_carbamoyltransferase [Bacillus_cereus]                                               | CPTF_Cd         | 1456915.133 | 257379.6425 | 17.66606967 |
| UIJ65063.1 | ornithine_carbamoyltransferase [Bacillus_cereus]                                               | CPTF_Co         | 1841539.5   | 363577.2928 | 19.74311672 |
| UIJ65063.1 | ornithine_carbamoyltransferase [Bacillus_cereus]                                               | CPTF_Cu         | 1931936.867 | 527942.8347 | 27.32712667 |
| UIJ65063.1 | ornithine_carbamoyltransferase [Bacillus_cereus]                                               | CPTF_Fe         | 1330329.9   | 422019.5521 | 31.72292468 |
| UIJ65063.1 | ornithine_carbamoyltransferase [Bacillus_cereus]                                               | CPTF_Mn         | 1610683.433 | 255139.7057 | 15.84046253 |
| UIJ65063.1 | ornithine_carbamoyltransferase [Bacillus_cereus]                                               | CPTF_Ni         | 1430159.667 | 140211.0982 | 9.803877248 |
| UIJ65063.1 | ornithine_carbamoyltransferase [Bacillus_cereus]                                               | CPTF_U          | 1393870.333 | 908566.1501 | 65.18297494 |
| UIJ65063.1 | ornithine_carbamoyltransferase [Bacillus_cereus]                                               | CPTF_metals_mix | 4000971.933 | 305616.3209 | 7.638551982 |
| UIJ65063.1 | ornithine_carbamoyltransferase [Bacillus_cereus]                                               | CPTF_zcontrol   | 1836622     | 725421.6866 | 39.49760411 |
| UIJ65064.1 | acetylornithine_transaminase [Bacillus_cereus]                                                 | CPTF_Al         | 449474.8    | 85981.31857 | 19.12928568 |
| UIJ65064.1 | acetylornithine_transaminase [Bacillus_cereus]                                                 | CPTF_Cd         | 606852.4667 | 143325.1006 | 23.61778331 |
| UIJ65064.1 | acetylornithine_transaminase [Bacillus_cereus]                                                 | CPTF_Co         | 713817.6333 | 107608.2876 | 15.07503914 |
| UIJ65064.1 | acetylornithine_transaminase [Bacillus_cereus]                                                 | CPTF_Cu         | 808384.5667 | 25789.07516 | 3.190198851 |
| UIJ65064.1 | acetylornithine_transaminase [Bacillus_cereus]                                                 | CPTF_Fe         | 527301.4333 | 71357.36403 | 13.53255643 |
| UIJ65064.1 | acetylornithine_transaminase [Bacillus_cereus]                                                 | CPTF_Mn         | 400628.6333 | 76673.56639 | 19.13831414 |
| UIJ65064.1 | acetylornithine_transaminase [Bacillus_cereus]                                                 | CPTF_Ni         | 401317.4    | 188819.0341 | 47.04980002 |
| UIJ65064.1 | acetylornithine_transaminase [Bacillus_cereus]                                                 | CPTF_U          | 495174.6667 | 99088.69635 | 20.01085738 |
| UIJ65064.1 | acetylornithine_transaminase [Bacillus_cereus]                                                 | CPTF_metals_mix | 1250662.2   | 96958.99995 | 7.752612972 |
| UIJ65064.1 | acetylornithine_transaminase [Bacillus_cereus]                                                 | CPTF_zcontrol   | 400800.6667 | 45544.87629 | 11.36347319 |
| UIJ65065.1 | acetylglutamate_kinase [Bacillus_cereus]                                                       | CPTF_Al         | 0           | 0           | 0           |
| UIJ65065.1 | acetylglutamate_kinase [Bacillus_cereus]                                                       | CPTF_Cd         | 0           | 0           | 0           |
| UIJ65065.1 | acetylglutamate_kinase [Bacillus_cereus]                                                       | CPTF_Co         | 4863.9      | 8424.521923 | 173.2050808 |
| UIJ65065.1 | acetylglutamate_kinase [Bacillus_cereus]                                                       | CPTF_Cu         | 0           | 0           | 0           |
| UIJ65065.1 | acetylglutamate_kinase [Bacillus_cereus]                                                       | CPTF_Fe         | 0           | 0           | 0           |
| UIJ65065.1 | acetylglutamate_kinase [Bacillus_cereus]                                                       | CPTF_Mn         | 0           | 0           | 0           |
| UIJ65065.1 | acetylglutamate_kinase [Bacillus_cereus]                                                       | CPTF_Ni         | 0           | 0           | 0           |
| UIJ65065.1 | acetylglutamate_kinase [Bacillus_cereus]                                                       | CPTF_U          | 0           | 0           | 0           |
| UIJ65065.1 | acetylglutamate_kinase [Bacillus_cereus]                                                       | CPTF_metals_mix | 66757.3     | 69478.71077 | 104.0765741 |
| UIJ65065.1 | acetylglutamate_kinase [Bacillus_cereus]                                                       | CPTF_zcontrol   | 0           | 0           | 0           |
| UIJ65066.1 | bifunctional_glutamate_N-acetyltransferase/amino-acid_acetyltransferase_ArgJ [Bacillus_cereus] | CPTF_Al         | 0           | 0           | 0           |
| UIJ65066.1 | bifunctional_glutamate_N-acetyltransferase/amino-acid_acetyltransferase_ArgJ [Bacillus_cereus] | CPTF_Cd         | 0           | 0           | 0           |
| UIJ65066.1 | bifunctional_glutamate_N-acetyltransferase/amino-acid_acetyltransferase_ArgJ [Bacillus_cereus] | CPTF_Co         | 0           | 0           | 0           |
| UIJ65066.1 | bifunctional_glutamate_N-acetyltransferase/amino-acid_acetyltransferase_ArgJ [Bacillus_cereus] | CPTF_Cu         | 0           | 0           | 0           |
| UIJ65066.1 | bifunctional_glutamate_N-acetyltransferase/amino-acid_acetyltransferase_ArgJ [Bacillus_cereus] | CPTF_Fe         | 0           | 0           | 0           |
| UIJ65066.1 | bifunctional_glutamate_N-acetyltransferase/amino-acid_acetyltransferase_ArgJ [Bacillus_cereus] | CPTF_Mn         | 0           | 0           | 0           |
| UIJ65066.1 | bifunctional_glutamate_N-acetyltransferase/amino-acid_acetyltransferase_ArgJ [Bacillus_cereus] | CPTF_Ni         | 0           | 0           | 0           |

|            |                                                                                                |                 |             |             |             |
|------------|------------------------------------------------------------------------------------------------|-----------------|-------------|-------------|-------------|
| UIJ65066.1 | bifunctional_glutamate_N-acetyltransferase/amino-acid_acetyltransferase_ArgI_[Bacillus_cereus] | CPTF_U          | 0           | 0           | 0           |
| UIJ65066.1 | bifunctional_glutamate_N-acetyltransferase/amino-acid_acetyltransferase_ArgI_[Bacillus_cereus] | CPTF_metals_mix | 58994.4     | 61607.01709 | 104.4285849 |
| UIJ65066.1 | bifunctional_glutamate_N-acetyltransferase/amino-acid_acetyltransferase_ArgI_[Bacillus_cereus] | CPTF_zcontrol   | 0           | 0           | 0           |
| UIJ65067.1 | N-acetyl-gamma-glutamyl-phosphate_reductase_[Bacillus_cereus]                                  | CPTF_Al         | 251842.6667 | 18021.86035 | 7.15599965  |
| UIJ65067.1 | N-acetyl-gamma-glutamyl-phosphate_reductase_[Bacillus_cereus]                                  | CPTF_Cd         | 281660      | 72054.36279 | 25.58203607 |
| UIJ65067.1 | N-acetyl-gamma-glutamyl-phosphate_reductase_[Bacillus_cereus]                                  | CPTF_Co         | 222702      | 50219.44254 | 22.55006356 |
| UIJ65067.1 | N-acetyl-gamma-glutamyl-phosphate_reductase_[Bacillus_cereus]                                  | CPTF_Cu         | 250449.6667 | 12118.01074 | 4.838501445 |
| UIJ65067.1 | N-acetyl-gamma-glutamyl-phosphate_reductase_[Bacillus_cereus]                                  | CPTF_Fe         | 238398.3333 | 64493.13692 | 27.05267944 |
| UIJ65067.1 | N-acetyl-gamma-glutamyl-phosphate_reductase_[Bacillus_cereus]                                  | CPTF_Mn         | 185246.1333 | 98322.19382 | 53.07651612 |
| UIJ65067.1 | N-acetyl-gamma-glutamyl-phosphate_reductase_[Bacillus_cereus]                                  | CPTF_Ni         | 227859.6667 | 36583.09722 | 16.05509995 |
| UIJ65067.1 | N-acetyl-gamma-glutamyl-phosphate_reductase_[Bacillus_cereus]                                  | CPTF_U          | 294239.6667 | 38222.77411 | 12.99035393 |
| UIJ65067.1 | N-acetyl-gamma-glutamyl-phosphate_reductase_[Bacillus_cereus]                                  | CPTF_metals_mix | 792417.4667 | 122776.0163 | 15.49385538 |
| UIJ65067.1 | N-acetyl-gamma-glutamyl-phosphate_reductase_[Bacillus_cereus]                                  | CPTF_zcontrol   | 210707.3333 | 29913.16435 | 14.1965464  |
| UIJ65072.1 | L-serine_ammonia-lyase_iron-sulfur-dependent_subunit_alpha_[Bacillus_cereus]                   | CPTF_Al         | 375751.1333 | 501346.49   | 133.4251438 |
| UIJ65072.1 | L-serine_ammonia-lyase_iron-sulfur-dependent_subunit_alpha_[Bacillus_cereus]                   | CPTF_Cd         | 44670.93333 | 41355.41145 | 92.57789878 |
| UIJ65072.1 | L-serine_ammonia-lyase_iron-sulfur-dependent_subunit_alpha_[Bacillus_cereus]                   | CPTF_Co         | 121918.6    | 70113.26705 | 57.50826129 |
| UIJ65072.1 | L-serine_ammonia-lyase_iron-sulfur-dependent_subunit_alpha_[Bacillus_cereus]                   | CPTF_Cu         | 640853.3333 | 276809.0192 | 43.19381749 |
| UIJ65072.1 | L-serine_ammonia-lyase_iron-sulfur-dependent_subunit_alpha_[Bacillus_cereus]                   | CPTF_Fe         | 282388.9667 | 259876.1366 | 92.02772322 |
| UIJ65072.1 | L-serine_ammonia-lyase_iron-sulfur-dependent_subunit_alpha_[Bacillus_cereus]                   | CPTF_Mn         | 355133.3    | 501204.1845 | 141.1312835 |
| UIJ65072.1 | L-serine_ammonia-lyase_iron-sulfur-dependent_subunit_alpha_[Bacillus_cereus]                   | CPTF_Ni         | 69582.7     | 84669.59691 | 121.6819654 |
| UIJ65072.1 | L-serine_ammonia-lyase_iron-sulfur-dependent_subunit_alpha_[Bacillus_cereus]                   | CPTF_U          | 119300.8333 | 23926.04875 | 20.05522349 |
| UIJ65072.1 | L-serine_ammonia-lyase_iron-sulfur-dependent_subunit_alpha_[Bacillus_cereus]                   | CPTF_metals_mix | 743001      | 179380.4606 | 24.14269437 |
| UIJ65072.1 | L-serine_ammonia-lyase_iron-sulfur-dependent_subunit_alpha_[Bacillus_cereus]                   | CPTF_zcontrol   | 42892.8     | 39800.89446 | 92.79155117 |
| UIJ65076.1 | tripeptidase_T_[Bacillus_cereus]                                                               | CPTF_Al         | 10692651    | 465972.0103 | 4.357871685 |
| UIJ65076.1 | tripeptidase_T_[Bacillus_cereus]                                                               | CPTF_Cd         | 11426905    | 711301.4862 | 6.224795657 |
| UIJ65076.1 | tripeptidase_T_[Bacillus_cereus]                                                               | CPTF_Co         | 9672606.667 | 913960.2907 | 9.448955408 |
| UIJ65076.1 | tripeptidase_T_[Bacillus_cereus]                                                               | CPTF_Cu         | 10389730.23 | 484594.4294 | 4.664167582 |
| UIJ65076.1 | tripeptidase_T_[Bacillus_cereus]                                                               | CPTF_Fe         | 10528603.43 | 1199827.797 | 11.39588745 |
| UIJ65076.1 | tripeptidase_T_[Bacillus_cereus]                                                               | CPTF_Mn         | 10890185.57 | 1758445.217 | 16.14706385 |
| UIJ65076.1 | tripeptidase_T_[Bacillus_cereus]                                                               | CPTF_Ni         | 8414434.033 | 1017043.149 | 12.08688718 |
| UIJ65076.1 | tripeptidase_T_[Bacillus_cereus]                                                               | CPTF_U          | 9160753.833 | 232019.1269 | 2.532751465 |
| UIJ65076.1 | tripeptidase_T_[Bacillus_cereus]                                                               | CPTF_metals_mix | 12489657.2  | 706659.5219 | 5.657957705 |
| UIJ65076.1 | tripeptidase_T_[Bacillus_cereus]                                                               | CPTF_zcontrol   | 10445166.33 | 368437.9334 | 3.527353434 |
| UIJ65077.1 | GNAT_family_N-acetyltransferase_[Bacillus_cereus]                                              | CPTF_Al         | 0           | 0           | 0           |
| UIJ65077.1 | GNAT_family_N-acetyltransferase_[Bacillus_cereus]                                              | CPTF_Cd         | 0           | 0           | 0           |
| UIJ65077.1 | GNAT_family_N-acetyltransferase_[Bacillus_cereus]                                              | CPTF_Co         | 0           | 0           | 0           |
| UIJ65077.1 | GNAT_family_N-acetyltransferase_[Bacillus_cereus]                                              | CPTF_Cu         | 0           | 0           | 0           |
| UIJ65077.1 | GNAT_family_N-acetyltransferase_[Bacillus_cereus]                                              | CPTF_Fe         | 0           | 0           | 0           |
| UIJ65077.1 | GNAT_family_N-acetyltransferase_[Bacillus_cereus]                                              | CPTF_Mn         | 0           | 0           | 0           |
| UIJ65077.1 | GNAT_family_N-acetyltransferase_[Bacillus_cereus]                                              | CPTF_Ni         | 0           | 0           | 0           |
| UIJ65077.1 | GNAT_family_N-acetyltransferase_[Bacillus_cereus]                                              | CPTF_U          | 0           | 0           | 0           |
| UIJ65077.1 | GNAT_family_N-acetyltransferase_[Bacillus_cereus]                                              | CPTF_metals_mix | 475867.1667 | 100048.9965 | 21.02456389 |
| UIJ65077.1 | GNAT_family_N-acetyltransferase_[Bacillus_cereus]                                              | CPTF_zcontrol   | 0           | 0           | 0           |
| UIJ65082.1 | amino_acid_ABC_transporter_ATP-binding_protein_[Bacillus_cereus]                               | CPTF_Al         | 2690707.667 | 128139.3556 | 4.762291988 |
| UIJ65082.1 | amino_acid_ABC_transporter_ATP-binding_protein_[Bacillus_cereus]                               | CPTF_Cd         | 2341525.333 | 82165.6112  | 3.509063517 |
| UIJ65082.1 | amino_acid_ABC_transporter_ATP-binding_protein_[Bacillus_cereus]                               | CPTF_Co         | 2376387     | 567690.0921 | 23.88878967 |
| UIJ65082.1 | amino_acid_ABC_transporter_ATP-binding_protein_[Bacillus_cereus]                               | CPTF_Cu         | 2423014.333 | 122015.7859 | 5.035702191 |
| UIJ65082.1 | amino_acid_ABC_transporter_ATP-binding_protein_[Bacillus_cereus]                               | CPTF_Fe         | 2365560     | 484948.13   | 20.50035213 |
| UIJ65082.1 | amino_acid_ABC_transporter_ATP-binding_protein_[Bacillus_cereus]                               | CPTF_Mn         | 2371432.333 | 328146.3025 | 13.83747273 |
| UIJ65082.1 | amino_acid_ABC_transporter_ATP-binding_protein_[Bacillus_cereus]                               | CPTF_Ni         | 2256298.667 | 124510.6225 | 5.518357315 |
| UIJ65082.1 | amino_acid_ABC_transporter_ATP-binding_protein_[Bacillus_cereus]                               | CPTF_U          | 2661109.667 | 502084.739  | 18.86749521 |
| UIJ65082.1 | amino_acid_ABC_transporter_ATP-binding_protein_[Bacillus_cereus]                               | CPTF_metals_mix | 2951206     | 427513.8633 | 14.48607326 |
| UIJ65082.1 | amino_acid_ABC_transporter_ATP-binding_protein_[Bacillus_cereus]                               | CPTF_zcontrol   | 2757831.333 | 268478.7953 | 9.73514196  |
| UIJ65083.1 | amino_acid_ABC_transporter_permease_[Bacillus_cereus]                                          | CPTF_Al         | 633777.3    | 99284.99829 | 15.66559709 |
| UIJ65083.1 | amino_acid_ABC_transporter_permease_[Bacillus_cereus]                                          | CPTF_Cd         | 508147.4333 | 122998.1684 | 24.20521297 |
| UIJ65083.1 | amino_acid_ABC_transporter_permease_[Bacillus_cereus]                                          | CPTF_Co         | 674703.6667 | 83368.34657 | 12.35629072 |
| UIJ65083.1 | amino_acid_ABC_transporter_permease_[Bacillus_cereus]                                          | CPTF_Cu         | 639345.5333 | 47378.96999 | 7.410542112 |
| UIJ65083.1 | amino_acid_ABC_transporter_permease_[Bacillus_cereus]                                          | CPTF_Fe         | 583944.1667 | 120401.2158 | 20.61861778 |
| UIJ65083.1 | amino_acid_ABC_transporter_permease_[Bacillus_cereus]                                          | CPTF_Mn         | 559430.4333 | 69091.27878 | 12.35028963 |
| UIJ65083.1 | amino_acid_ABC_transporter_permease_[Bacillus_cereus]                                          | CPTF_Ni         | 685899.0333 | 190530.9197 | 27.77827499 |
| UIJ65083.1 | amino_acid_ABC_transporter_permease_[Bacillus_cereus]                                          | CPTF_U          | 558809.3333 | 50554.00008 | 9.046735097 |

|            |                                                                                    |                 |             |             |             |
|------------|------------------------------------------------------------------------------------|-----------------|-------------|-------------|-------------|
| UIJ65083.1 | amino_acid_ABC_transporter_permease_[ <i>Bacillus_cereus</i> ]                     | CPTF_metals_mix | 750627.0333 | 63513.72583 | 8.461422652 |
| UIJ65083.1 | amino_acid_ABC_transporter_permease_[ <i>Bacillus_cereus</i> ]                     | CPTF_zcontrol   | 590405.3667 | 87291.86538 | 14.78507316 |
| UIJ65084.1 | transporter_substrate-binding_domain-containing_protein_[ <i>Bacillus_cereus</i> ] | CPTF_Al         | 5491414.433 | 443942.989  | 8.084310415 |
| UIJ65084.1 | transporter_substrate-binding_domain-containing_protein_[ <i>Bacillus_cereus</i> ] | CPTF_Cd         | 5515083.067 | 548760.649  | 9.950179215 |
| UIJ65084.1 | transporter_substrate-binding_domain-containing_protein_[ <i>Bacillus_cereus</i> ] | CPTF_Co         | 5953983.9   | 401670.8636 | 6.746253774 |
| UIJ65084.1 | transporter_substrate-binding_domain-containing_protein_[ <i>Bacillus_cereus</i> ] | CPTF_Cu         | 5759478.833 | 631221.2984 | 10.95969473 |
| UIJ65084.1 | transporter_substrate-binding_domain-containing_protein_[ <i>Bacillus_cereus</i> ] | CPTF_Fe         | 5304894.667 | 133598.9567 | 2.518409225 |
| UIJ65084.1 | transporter_substrate-binding_domain-containing_protein_[ <i>Bacillus_cereus</i> ] | CPTF_Mn         | 6003704.833 | 1361762.301 | 22.68203282 |
| UIJ65084.1 | transporter_substrate-binding_domain-containing_protein_[ <i>Bacillus_cereus</i> ] | CPTF_Ni         | 4197955.033 | 747143.5572 | 17.79779801 |
| UIJ65084.1 | transporter_substrate-binding_domain-containing_protein_[ <i>Bacillus_cereus</i> ] | CPTF_U          | 4691230.667 | 468359.6491 | 9.983726711 |
| UIJ65084.1 | transporter_substrate-binding_domain-containing_protein_[ <i>Bacillus_cereus</i> ] | CPTF_metals_mix | 8488736.067 | 606472.4457 | 7.144437534 |
| UIJ65084.1 | transporter_substrate-binding_domain-containing_protein_[ <i>Bacillus_cereus</i> ] | CPTF_zcontrol   | 4960983.4   | 525756.8086 | 10.59783447 |
| UIJ65088.1 | 2-oxo_acid_dehydrogenase_subunit_E2_[ <i>Bacillus_cereus</i> ]                     | CPTF_Al         | 2358691.633 | 179169.9924 | 7.596160087 |
| UIJ65088.1 | 2-oxo_acid_dehydrogenase_subunit_E2_[ <i>Bacillus_cereus</i> ]                     | CPTF_Cd         | 2082684.333 | 769473.0284 | 36.94621485 |
| UIJ65088.1 | 2-oxo_acid_dehydrogenase_subunit_E2_[ <i>Bacillus_cereus</i> ]                     | CPTF_Co         | 2257827     | 194018.107  | 8.593134326 |
| UIJ65088.1 | 2-oxo_acid_dehydrogenase_subunit_E2_[ <i>Bacillus_cereus</i> ]                     | CPTF_Cu         | 2454080.933 | 111015.4122 | 4.523706236 |
| UIJ65088.1 | 2-oxo_acid_dehydrogenase_subunit_E2_[ <i>Bacillus_cereus</i> ]                     | CPTF_Fe         | 1907240.333 | 572617.2517 | 30.02334009 |
| UIJ65088.1 | 2-oxo_acid_dehydrogenase_subunit_E2_[ <i>Bacillus_cereus</i> ]                     | CPTF_Mn         | 2473872.633 | 115137.7651 | 4.654150889 |
| UIJ65088.1 | 2-oxo_acid_dehydrogenase_subunit_E2_[ <i>Bacillus_cereus</i> ]                     | CPTF_Ni         | 2350050.067 | 243314.4608 | 10.35358626 |
| UIJ65088.1 | 2-oxo_acid_dehydrogenase_subunit_E2_[ <i>Bacillus_cereus</i> ]                     | CPTF_U          | 1932419.667 | 849064.9095 | 43.93791495 |
| UIJ65088.1 | 2-oxo_acid_dehydrogenase_subunit_E2_[ <i>Bacillus_cereus</i> ]                     | CPTF_metals_mix | 3527558.167 | 592937.1064 | 16.80871238 |
| UIJ65088.1 | 2-oxo_acid_dehydrogenase_subunit_E2_[ <i>Bacillus_cereus</i> ]                     | CPTF_zcontrol   | 2115954.667 | 498011.3518 | 23.53601236 |
| UIJ65089.1 | 3-methyl-2-oxobutanoate_dehydrogenase_subunit_beta_[ <i>Bacillus_cereus</i> ]      | CPTF_Al         | 1353412.767 | 339406.9325 | 25.07785806 |
| UIJ65089.1 | 3-methyl-2-oxobutanoate_dehydrogenase_subunit_beta_[ <i>Bacillus_cereus</i> ]      | CPTF_Cd         | 1842177     | 133417.3748 | 7.242375449 |
| UIJ65089.1 | 3-methyl-2-oxobutanoate_dehydrogenase_subunit_beta_[ <i>Bacillus_cereus</i> ]      | CPTF_Co         | 1289303.167 | 247160.6967 | 19.17009925 |
| UIJ65089.1 | 3-methyl-2-oxobutanoate_dehydrogenase_subunit_beta_[ <i>Bacillus_cereus</i> ]      | CPTF_Cu         | 1278471.667 | 104959.7744 | 8.209784946 |
| UIJ65089.1 | 3-methyl-2-oxobutanoate_dehydrogenase_subunit_beta_[ <i>Bacillus_cereus</i> ]      | CPTF_Fe         | 1493936.067 | 255415.2351 | 17.09679824 |
| UIJ65089.1 | 3-methyl-2-oxobutanoate_dehydrogenase_subunit_beta_[ <i>Bacillus_cereus</i> ]      | CPTF_Mn         | 1446840.7   | 201346.5963 | 13.91629337 |
| UIJ65089.1 | 3-methyl-2-oxobutanoate_dehydrogenase_subunit_beta_[ <i>Bacillus_cereus</i> ]      | CPTF_Ni         | 959210.0333 | 152158.5099 | 15.86289808 |
| UIJ65089.1 | 3-methyl-2-oxobutanoate_dehydrogenase_subunit_beta_[ <i>Bacillus_cereus</i> ]      | CPTF_U          | 1061656     | 203037.8317 | 19.12463469 |
| UIJ65089.1 | 3-methyl-2-oxobutanoate_dehydrogenase_subunit_beta_[ <i>Bacillus_cereus</i> ]      | CPTF_metals_mix | 3902791.667 | 605812.5128 | 15.52254295 |
| UIJ65089.1 | 3-methyl-2-oxobutanoate_dehydrogenase_subunit_beta_[ <i>Bacillus_cereus</i> ]      | CPTF_zcontrol   | 1203508.667 | 194612.0814 | 16.17039301 |
| UIJ65090.1 | 3-methyl-2-oxobutanoate_dehydrogenase_subunit_alpha_[ <i>Bacillus_cereus</i> ]     | CPTF_Al         | 1961571.833 | 219669.0488 | 11.19862373 |
| UIJ65090.1 | 3-methyl-2-oxobutanoate_dehydrogenase_subunit_alpha_[ <i>Bacillus_cereus</i> ]     | CPTF_Cd         | 2098761.867 | 58589.95079 | 2.791643574 |
| UIJ65090.1 | 3-methyl-2-oxobutanoate_dehydrogenase_subunit_alpha_[ <i>Bacillus_cereus</i> ]     | CPTF_Co         | 1998405.167 | 147173.8568 | 7.364565467 |
| UIJ65090.1 | 3-methyl-2-oxobutanoate_dehydrogenase_subunit_alpha_[ <i>Bacillus_cereus</i> ]     | CPTF_Cu         | 2218667.6   | 217076.9453 | 9.784113011 |
| UIJ65090.1 | 3-methyl-2-oxobutanoate_dehydrogenase_subunit_alpha_[ <i>Bacillus_cereus</i> ]     | CPTF_Fe         | 2137977.633 | 143299.7247 | 6.702582967 |
| UIJ65090.1 | 3-methyl-2-oxobutanoate_dehydrogenase_subunit_alpha_[ <i>Bacillus_cereus</i> ]     | CPTF_Mn         | 2065590.733 | 201145.6843 | 9.73792538  |
| UIJ65090.1 | 3-methyl-2-oxobutanoate_dehydrogenase_subunit_alpha_[ <i>Bacillus_cereus</i> ]     | CPTF_Ni         | 1715567.167 | 757556.6658 | 44.15779694 |
| UIJ65090.1 | 3-methyl-2-oxobutanoate_dehydrogenase_subunit_alpha_[ <i>Bacillus_cereus</i> ]     | CPTF_U          | 1908702.6   | 430576.9616 | 22.55861975 |
| UIJ65090.1 | 3-methyl-2-oxobutanoate_dehydrogenase_subunit_alpha_[ <i>Bacillus_cereus</i> ]     | CPTF_metals_mix | 2267418.067 | 35455.3194  | 1.563686905 |
| UIJ65090.1 | 3-methyl-2-oxobutanoate_dehydrogenase_subunit_alpha_[ <i>Bacillus_cereus</i> ]     | CPTF_zcontrol   | 2100997.567 | 70089.91988 | 3.336030512 |
| UIJ65091.1 | dihydropolipoyl_dehydrogenase_[ <i>Bacillus_cereus</i> ]                           | CPTF_Al         | 1293733.5   | 631675.0107 | 48.82574431 |
| UIJ65091.1 | dihydropolipoyl_dehydrogenase_[ <i>Bacillus_cereus</i> ]                           | CPTF_Cd         | 2273100.333 | 113432.7732 | 4.990222892 |
| UIJ65091.1 | dihydropolipoyl_dehydrogenase_[ <i>Bacillus_cereus</i> ]                           | CPTF_Co         | 1346673.8   | 443498.3695 | 32.93287279 |
| UIJ65091.1 | dihydropolipoyl_dehydrogenase_[ <i>Bacillus_cereus</i> ]                           | CPTF_Cu         | 1218026.867 | 216405.3852 | 17.7668811  |
| UIJ65091.1 | dihydropolipoyl_dehydrogenase_[ <i>Bacillus_cereus</i> ]                           | CPTF_Fe         | 1657838     | 394840.6433 | 23.81659989 |
| UIJ65091.1 | dihydropolipoyl_dehydrogenase_[ <i>Bacillus_cereus</i> ]                           | CPTF_Mn         | 1465803.333 | 994709.7988 | 67.86106814 |
| UIJ65091.1 | dihydropolipoyl_dehydrogenase_[ <i>Bacillus_cereus</i> ]                           | CPTF_Ni         | 207496.7    | 222557.6053 | 107.258383  |
| UIJ65091.1 | dihydropolipoyl_dehydrogenase_[ <i>Bacillus_cereus</i> ]                           | CPTF_U          | 1035835.8   | 511152.4488 | 49.34686065 |
| UIJ65091.1 | dihydropolipoyl_dehydrogenase_[ <i>Bacillus_cereus</i> ]                           | CPTF_metals_mix | 2991661.1   | 165896.4145 | 5.545294369 |
| UIJ65091.1 | dihydropolipoyl_dehydrogenase_[ <i>Bacillus_cereus</i> ]                           | CPTF_zcontrol   | 1125754     | 560303.7707 | 49.7714217  |
| UIJ65092.1 | butyrate_kinase_[ <i>Bacillus_cereus</i> ]                                         | CPTF_Al         | 141320      | 14104.72655 | 9.980700926 |
| UIJ65092.1 | butyrate_kinase_[ <i>Bacillus_cereus</i> ]                                         | CPTF_Cd         | 129286.8    | 33965.25488 | 26.27124724 |
| UIJ65092.1 | butyrate_kinase_[ <i>Bacillus_cereus</i> ]                                         | CPTF_Co         | 146355.0333 | 45908.1944  | 31.36769085 |
| UIJ65092.1 | butyrate_kinase_[ <i>Bacillus_cereus</i> ]                                         | CPTF_Cu         | 132639.1667 | 30222.27908 | 22.78533547 |
| UIJ65092.1 | butyrate_kinase_[ <i>Bacillus_cereus</i> ]                                         | CPTF_Fe         | 133483.1667 | 27789.62856 | 20.81882627 |
| UIJ65092.1 | butyrate_kinase_[ <i>Bacillus_cereus</i> ]                                         | CPTF_Mn         | 194981.6    | 127903.4655 | 65.59771051 |
| UIJ65092.1 | butyrate_kinase_[ <i>Bacillus_cereus</i> ]                                         | CPTF_Ni         | 122420.3333 | 18620.12396 | 15.20999286 |
| UIJ65092.1 | butyrate_kinase_[ <i>Bacillus_cereus</i> ]                                         | CPTF_U          | 148801      | 41044.33325 | 27.58337192 |
| UIJ65092.1 | butyrate_kinase_[ <i>Bacillus_cereus</i> ]                                         | CPTF_metals_mix | 1004244.233 | 242776.0406 | 24.17499972 |



|            |                                                           |                 |             |             |             |
|------------|-----------------------------------------------------------|-----------------|-------------|-------------|-------------|
| UIJ65092.1 | butyrate_kinase_[Bacillus_cereus]                         | CPTF_zcontrol   | 117132.0333 | 30075.40061 | 25.67649494 |
| UIJ65093.1 | leucine_dehydrogenase_[Bacillus_cereus]                   | CPTF_Al         | 7410487.7   | 512563.0717 | 6.91672522  |
| UIJ65093.1 | leucine_dehydrogenase_[Bacillus_cereus]                   | CPTF_Cd         | 7925406     | 309656.8482 | 3.90714177  |
| UIJ65093.1 | leucine_dehydrogenase_[Bacillus_cereus]                   | CPTF_Co         | 7548645.8   | 728162.2573 | 9.646263404 |
| UIJ65093.1 | leucine_dehydrogenase_[Bacillus_cereus]                   | CPTF_Cu         | 7758026.733 | 485819.2881 | 6.26215022  |
| UIJ65093.1 | leucine_dehydrogenase_[Bacillus_cereus]                   | CPTF_Fe         | 7615900     | 798714.0245 | 10.4874542  |
| UIJ65093.1 | leucine_dehydrogenase_[Bacillus_cereus]                   | CPTF_Mn         | 7300114.467 | 873181.9113 | 11.96120849 |
| UIJ65093.1 | leucine_dehydrogenase_[Bacillus_cereus]                   | CPTF_Ni         | 6914912.967 | 501172.3748 | 7.247703294 |
| UIJ65093.1 | leucine_dehydrogenase_[Bacillus_cereus]                   | CPTF_U          | 6925508     | 1122541.19  | 16.20879205 |
| UIJ65093.1 | leucine_dehydrogenase_[Bacillus_cereus]                   | CPTF_metals_mix | 12550386.4  | 1995854.991 | 15.90273739 |
| UIJ65093.1 | leucine_dehydrogenase_[Bacillus_cereus]                   | CPTF_zcontrol   | 6812733.5   | 216111.2272 | 3.172166168 |
| UIJ65097.1 | glycerophosphodiester_phosphodiesterase_[Bacillus_cereus] | CPTF_Al         | 0           | 0           | 0           |
| UIJ65097.1 | glycerophosphodiester_phosphodiesterase_[Bacillus_cereus] | CPTF_Cd         | 0           | 0           | 0           |
| UIJ65097.1 | glycerophosphodiester_phosphodiesterase_[Bacillus_cereus] | CPTF_Co         | 48137.33333 | 83376.30707 | 173.2050808 |
| UIJ65097.1 | glycerophosphodiester_phosphodiesterase_[Bacillus_cereus] | CPTF_Cu         | 0           | 0           | 0           |
| UIJ65097.1 | glycerophosphodiester_phosphodiesterase_[Bacillus_cereus] | CPTF_Fe         | 64225.33333 | 111241.5405 | 173.2050808 |
| UIJ65097.1 | glycerophosphodiester_phosphodiesterase_[Bacillus_cereus] | CPTF_Mn         | 0           | 0           | 0           |
| UIJ65097.1 | glycerophosphodiester_phosphodiesterase_[Bacillus_cereus] | CPTF_Ni         | 0           | 0           | 0           |
| UIJ65097.1 | glycerophosphodiester_phosphodiesterase_[Bacillus_cereus] | CPTF_U          | 0           | 0           | 0           |
| UIJ65097.1 | glycerophosphodiester_phosphodiesterase_[Bacillus_cereus] | CPTF_metals_mix | 210416.4333 | 98305.89242 | 46.71968385 |
| UIJ65097.1 | glycerophosphodiester_phosphodiesterase_[Bacillus_cereus] | CPTF_zcontrol   | 0           | 0           | 0           |
| UIJ65100.1 | sporulation_transcription_factor_Spo0A_[Bacillus_cereus]  | CPTF_Al         | 167373.63   | 101945.9812 | 60.90922517 |
| UIJ65100.1 | sporulation_transcription_factor_Spo0A_[Bacillus_cereus]  | CPTF_Cd         | 105973.1667 | 39548.87091 | 37.31970286 |
| UIJ65100.1 | sporulation_transcription_factor_Spo0A_[Bacillus_cereus]  | CPTF_Co         | 389183.3    | 169865.4025 | 43.64663194 |
| UIJ65100.1 | sporulation_transcription_factor_Spo0A_[Bacillus_cereus]  | CPTF_Cu         | 171669.8333 | 28023.18419 | 16.32388385 |
| UIJ65100.1 | sporulation_transcription_factor_Spo0A_[Bacillus_cereus]  | CPTF_Fe         | 249750.2333 | 91091.70712 | 36.47312193 |
| UIJ65100.1 | sporulation_transcription_factor_Spo0A_[Bacillus_cereus]  | CPTF_Mn         | 211599.1333 | 245274.4722 | 115.9146866 |
| UIJ65100.1 | sporulation_transcription_factor_Spo0A_[Bacillus_cereus]  | CPTF_Ni         | 89536.16667 | 5737.064565 | 6.40753874  |
| UIJ65100.1 | sporulation_transcription_factor_Spo0A_[Bacillus_cereus]  | CPTF_U          | 152520      | 8687.199606 | 5.695777345 |
| UIJ65100.1 | sporulation_transcription_factor_Spo0A_[Bacillus_cereus]  | CPTF_metals_mix | 574747.7667 | 82115.27252 | 14.28718427 |
| UIJ65100.1 | sporulation_transcription_factor_Spo0A_[Bacillus_cereus]  | CPTF_zcontrol   | 291459.5333 | 228535.9439 | 78.41086592 |
| UIJ65103.1 | arginine_repressor_ArgR_[Bacillus_cereus]                 | CPTF_Al         | 2717748.767 | 176356.5144 | 6.489066118 |
| UIJ65103.1 | arginine_repressor_ArgR_[Bacillus_cereus]                 | CPTF_Cd         | 2700143     | 60088.94224 | 2.225398515 |
| UIJ65103.1 | arginine_repressor_ArgR_[Bacillus_cereus]                 | CPTF_Co         | 2723340.333 | 165894.2451 | 6.09157229  |
| UIJ65103.1 | arginine_repressor_ArgR_[Bacillus_cereus]                 | CPTF_Cu         | 2922667.333 | 84912.72468 | 2.905316103 |
| UIJ65103.1 | arginine_repressor_ArgR_[Bacillus_cereus]                 | CPTF_Fe         | 2702711.667 | 81102.32007 | 3.00077589  |
| UIJ65103.1 | arginine_repressor_ArgR_[Bacillus_cereus]                 | CPTF_Mn         | 2667040.667 | 440680.6808 | 16.52320815 |
| UIJ65103.1 | arginine_repressor_ArgR_[Bacillus_cereus]                 | CPTF_Ni         | 2737883.333 | 40322.50156 | 1.472761862 |
| UIJ65103.1 | arginine_repressor_ArgR_[Bacillus_cereus]                 | CPTF_U          | 2914282     | 186113.6133 | 6.386259574 |
| UIJ65103.1 | arginine_repressor_ArgR_[Bacillus_cereus]                 | CPTF_metals_mix | 2260062     | 79241.09652 | 3.506147022 |
| UIJ65103.1 | arginine_repressor_ArgR_[Bacillus_cereus]                 | CPTF_zcontrol   | 3002704.233 | 201332.2999 | 6.705032671 |
| UIJ65105.1 | 1-deoxy-D-xylulose-5-phosphate_synthase_[Bacillus_cereus] | CPTF_Al         | 143437.2667 | 95499.0355  | 66.57895658 |
| UIJ65105.1 | 1-deoxy-D-xylulose-5-phosphate_synthase_[Bacillus_cereus] | CPTF_Cd         | 183459.6    | 6925.46477  | 3.774926343 |
| UIJ65105.1 | 1-deoxy-D-xylulose-5-phosphate_synthase_[Bacillus_cereus] | CPTF_Co         | 204815.7333 | 120914.9205 | 59.03595323 |
| UIJ65105.1 | 1-deoxy-D-xylulose-5-phosphate_synthase_[Bacillus_cereus] | CPTF_Cu         | 274902.3333 | 105775.7759 | 38.47758389 |
| UIJ65105.1 | 1-deoxy-D-xylulose-5-phosphate_synthase_[Bacillus_cereus] | CPTF_Fe         | 252309.3    | 59679.40102 | 23.65327042 |
| UIJ65105.1 | 1-deoxy-D-xylulose-5-phosphate_synthase_[Bacillus_cereus] | CPTF_Mn         | 130175.6667 | 104465.8455 | 80.24990242 |
| UIJ65105.1 | 1-deoxy-D-xylulose-5-phosphate_synthase_[Bacillus_cereus] | CPTF_Ni         | 228513.1667 | 51108.46858 | 22.36565592 |
| UIJ65105.1 | 1-deoxy-D-xylulose-5-phosphate_synthase_[Bacillus_cereus] | CPTF_U          | 209183.4333 | 111178.5804 | 53.14884577 |
| UIJ65105.1 | 1-deoxy-D-xylulose-5-phosphate_synthase_[Bacillus_cereus] | CPTF_metals_mix | 276016.6    | 107155.5695 | 38.82214675 |
| UIJ65105.1 | 1-deoxy-D-xylulose-5-phosphate_synthase_[Bacillus_cereus] | CPTF_zcontrol   | 229303.1667 | 82600.41939 | 36.02236314 |
| UIJ65106.1 | (2E,6E)-farnesyl_diphosphate_synthase_[Bacillus_cereus]   | CPTF_Al         | 104156.3333 | 91742.67075 | 88.08170162 |
| UIJ65106.1 | (2E,6E)-farnesyl_diphosphate_synthase_[Bacillus_cereus]   | CPTF_Cd         | 106343.9    | 44913.22671 | 42.23394732 |
| UIJ65106.1 | (2E,6E)-farnesyl_diphosphate_synthase_[Bacillus_cereus]   | CPTF_Co         | 124460      | 10998.37006 | 8.836871333 |
| UIJ65106.1 | (2E,6E)-farnesyl_diphosphate_synthase_[Bacillus_cereus]   | CPTF_Cu         | 109249.7667 | 17822.96825 | 16.31396459 |
| UIJ65106.1 | (2E,6E)-farnesyl_diphosphate_synthase_[Bacillus_cereus]   | CPTF_Fe         | 84872.63333 | 36562.32659 | 43.07905287 |
| UIJ65106.1 | (2E,6E)-farnesyl_diphosphate_synthase_[Bacillus_cereus]   | CPTF_Mn         | 87240       | 86879.27507 | 99.58651429 |
| UIJ65106.1 | (2E,6E)-farnesyl_diphosphate_synthase_[Bacillus_cereus]   | CPTF_Ni         | 97143       | 85240.76864 | 87.74772103 |
| UIJ65106.1 | (2E,6E)-farnesyl_diphosphate_synthase_[Bacillus_cereus]   | CPTF_U          | 114430.3333 | 109460.1966 | 95.6566265  |
| UIJ65106.1 | (2E,6E)-farnesyl_diphosphate_synthase_[Bacillus_cereus]   | CPTF_metals_mix | 88123.66667 | 8277.49419  | 9.393043325 |
| UIJ65106.1 | (2E,6E)-farnesyl_diphosphate_synthase_[Bacillus_cereus]   | CPTF_zcontrol   | 132598      | 12989.26815 | 9.795975918 |

|            |                                                                                                                    |                 |             |             |             |
|------------|--------------------------------------------------------------------------------------------------------------------|-----------------|-------------|-------------|-------------|
| UIJ65109.1 | bifunctional_methylenetetrahydrofolate_dehydrogenase/methenyltetrahydrofolate_cyclohydrolase_FoD_[Bacillus_cereus] | CPTF_Al         | 13369616.27 | 921043.5965 | 6.889080271 |
| UIJ65109.1 | bifunctional_methylenetetrahydrofolate_dehydrogenase/methenyltetrahydrofolate_cyclohydrolase_FoD_[Bacillus_cereus] | CPTF_Cd         | 12298507.97 | 509675.5935 | 4.144206719 |
| UIJ65109.1 | bifunctional_methylenetetrahydrofolate_dehydrogenase/methenyltetrahydrofolate_cyclohydrolase_FoD_[Bacillus_cereus] | CPTF_Co         | 12640814.7  | 443666.9972 | 3.509797491 |
| UIJ65109.1 | bifunctional_methylenetetrahydrofolate_dehydrogenase/methenyltetrahydrofolate_cyclohydrolase_FoD_[Bacillus_cereus] | CPTF_Cu         | 10987489.3  | 1273693.309 | 11.59221432 |
| UIJ65109.1 | bifunctional_methylenetetrahydrofolate_dehydrogenase/methenyltetrahydrofolate_cyclohydrolase_FoD_[Bacillus_cereus] | CPTF_Fe         | 11894022    | 524441.3369 | 4.409285075 |
| UIJ65109.1 | bifunctional_methylenetetrahydrofolate_dehydrogenase/methenyltetrahydrofolate_cyclohydrolase_FoD_[Bacillus_cereus] | CPTF_Mn         | 13096390    | 754623.3467 | 5.762071431 |
| UIJ65109.1 | bifunctional_methylenetetrahydrofolate_dehydrogenase/methenyltetrahydrofolate_cyclohydrolase_FoD_[Bacillus_cereus] | CPTF_Ni         | 12591498.1  | 627294.6374 | 4.981890418 |
| UIJ65109.1 | bifunctional_methylenetetrahydrofolate_dehydrogenase/methenyltetrahydrofolate_cyclohydrolase_FoD_[Bacillus_cereus] | CPTF_U          | 12425802.67 | 706785.5157 | 5.68804716  |
| UIJ65109.1 | bifunctional_methylenetetrahydrofolate_dehydrogenase/methenyltetrahydrofolate_cyclohydrolase_FoD_[Bacillus_cereus] | CPTF_metals_mix | 12064657.43 | 555680.6595 | 4.605855264 |
| UIJ65109.1 | bifunctional_methylenetetrahydrofolate_dehydrogenase/methenyltetrahydrofolate_cyclohydrolase_FoD_[Bacillus_cereus] | CPTF_zcontrol   | 13997078.33 | 623807.8875 | 4.456700696 |
| UIJ65110.1 | N_utilization_substance_protein_NusB_[Bacillus_cereus]                                                             | CPTF_Al         | 274714.3333 | 475819.1829 | 173.2050808 |
| UIJ65110.1 | N_utilization_substance_protein_NusB_[Bacillus_cereus]                                                             | CPTF_Cd         | 95052.66667 | 82362.25884 | 86.64907754 |
| UIJ65110.1 | N_utilization_substance_protein_NusB_[Bacillus_cereus]                                                             | CPTF_Co         | 251104.3333 | 434925.4633 | 173.2050808 |
| UIJ65110.1 | N_utilization_substance_protein_NusB_[Bacillus_cereus]                                                             | CPTF_Cu         | 841047.3333 | 29620.61507 | 3.521872539 |
| UIJ65110.1 | N_utilization_substance_protein_NusB_[Bacillus_cereus]                                                             | CPTF_Fe         | 0           | 0           | 0           |
| UIJ65110.1 | N_utilization_substance_protein_NusB_[Bacillus_cereus]                                                             | CPTF_Mn         | 615308      | 543516.4069 | 88.33241351 |
| UIJ65110.1 | N_utilization_substance_protein_NusB_[Bacillus_cereus]                                                             | CPTF_Ni         | 777994.3333 | 162518.7468 | 20.88945122 |
| UIJ65110.1 | N_utilization_substance_protein_NusB_[Bacillus_cereus]                                                             | CPTF_U          | 691544.3333 | 105224.2135 | 15.21583048 |
| UIJ65110.1 | N_utilization_substance_protein_NusB_[Bacillus_cereus]                                                             | CPTF_metals_mix | 934292.9    | 133914.0453 | 14.33319737 |
| UIJ65110.1 | N_utilization_substance_protein_NusB_[Bacillus_cereus]                                                             | CPTF_zcontrol   | 526477.3333 | 480469.1282 | 91.26112328 |
| UIJ65111.1 | Asp23/Gls24_family_envelope_stress_response_protein_[Bacillus_cereus]                                              | CPTF_Al         | 6012000     | 110161.547  | 1.832361061 |
| UIJ65111.1 | Asp23/Gls24_family_envelope_stress_response_protein_[Bacillus_cereus]                                              | CPTF_Cd         | 6255089.467 | 109695.0846 | 1.753693295 |
| UIJ65111.1 | Asp23/Gls24_family_envelope_stress_response_protein_[Bacillus_cereus]                                              | CPTF_Co         | 5904095.933 | 168109.7225 | 2.847340632 |
| UIJ65111.1 | Asp23/Gls24_family_envelope_stress_response_protein_[Bacillus_cereus]                                              | CPTF_Cu         | 6129713.233 | 250293.5885 | 4.083283818 |
| UIJ65111.1 | Asp23/Gls24_family_envelope_stress_response_protein_[Bacillus_cereus]                                              | CPTF_Fe         | 6119514.867 | 184466.2063 | 3.014392649 |
| UIJ65111.1 | Asp23/Gls24_family_envelope_stress_response_protein_[Bacillus_cereus]                                              | CPTF_Mn         | 6090818.2   | 646448.1083 | 10.61348553 |
| UIJ65111.1 | Asp23/Gls24_family_envelope_stress_response_protein_[Bacillus_cereus]                                              | CPTF_Ni         | 5872906.1   | 96702.20741 | 1.646581876 |
| UIJ65111.1 | Asp23/Gls24_family_envelope_stress_response_protein_[Bacillus_cereus]                                              | CPTF_U          | 5990617.667 | 248423.8839 | 4.146882638 |
| UIJ65111.1 | Asp23/Gls24_family_envelope_stress_response_protein_[Bacillus_cereus]                                              | CPTF_metals_mix | 4398678.3   | 200705.9535 | 4.562869568 |
| UIJ65111.1 | Asp23/Gls24_family_envelope_stress_response_protein_[Bacillus_cereus]                                              | CPTF_zcontrol   | 6252367.567 | 97315.73937 | 1.556462225 |
| UIJ65112.1 | acetyl-CoA_carboxylase_biotin_carboxylase_subunit_[Bacillus_cereus]                                                | CPTF_Al         | 5239871.333 | 711273.0835 | 13.57424712 |
| UIJ65112.1 | acetyl-CoA_carboxylase_biotin_carboxylase_subunit_[Bacillus_cereus]                                                | CPTF_Cd         | 6364316.667 | 326650.0814 | 5.132524017 |
| UIJ65112.1 | acetyl-CoA_carboxylase_biotin_carboxylase_subunit_[Bacillus_cereus]                                                | CPTF_Co         | 5025513.333 | 233519.3708 | 4.646676971 |
| UIJ65112.1 | acetyl-CoA_carboxylase_biotin_carboxylase_subunit_[Bacillus_cereus]                                                | CPTF_Cu         | 4663252.8   | 148737.9413 | 3.189574911 |
| UIJ65112.1 | acetyl-CoA_carboxylase_biotin_carboxylase_subunit_[Bacillus_cereus]                                                | CPTF_Fe         | 5407863.033 | 591432.7365 | 10.93653321 |
| UIJ65112.1 | acetyl-CoA_carboxylase_biotin_carboxylase_subunit_[Bacillus_cereus]                                                | CPTF_Mn         | 5373015.333 | 758220.9813 | 14.11164745 |
| UIJ65112.1 | acetyl-CoA_carboxylase_biotin_carboxylase_subunit_[Bacillus_cereus]                                                | CPTF_Ni         | 4336390.267 | 306808.0854 | 7.075195417 |
| UIJ65112.1 | acetyl-CoA_carboxylase_biotin_carboxylase_subunit_[Bacillus_cereus]                                                | CPTF_U          | 4783734.667 | 664891.035  | 13.89899485 |
| UIJ65112.1 | acetyl-CoA_carboxylase_biotin_carboxylase_subunit_[Bacillus_cereus]                                                | CPTF_metals_mix | 7030516.133 | 320405.686  | 4.557356528 |
| UIJ65112.1 | acetyl-CoA_carboxylase_biotin_carboxylase_subunit_[Bacillus_cereus]                                                | CPTF_zcontrol   | 4882935.667 | 359797.2919 | 7.368462673 |
| UIJ65113.1 | acetyl-CoA_carboxylase_biotin_carboxyl_carrier_protein_[Bacillus_cereus]                                           | CPTF_Al         | 462559.6667 | 47858.13948 | 10.34637106 |
| UIJ65113.1 | acetyl-CoA_carboxylase_biotin_carboxyl_carrier_protein_[Bacillus_cereus]                                           | CPTF_Cd         | 485048      | 63228.7791  | 13.03557155 |
| UIJ65113.1 | acetyl-CoA_carboxylase_biotin_carboxyl_carrier_protein_[Bacillus_cereus]                                           | CPTF_Co         | 555818      | 101413.9662 | 18.24589456 |
| UIJ65113.1 | acetyl-CoA_carboxylase_biotin_carboxyl_carrier_protein_[Bacillus_cereus]                                           | CPTF_Cu         | 427154.6667 | 177724.2054 | 41.60652319 |
| UIJ65113.1 | acetyl-CoA_carboxylase_biotin_carboxyl_carrier_protein_[Bacillus_cereus]                                           | CPTF_Fe         | 526083.6667 | 127663.7098 | 24.26680733 |
| UIJ65113.1 | acetyl-CoA_carboxylase_biotin_carboxyl_carrier_protein_[Bacillus_cereus]                                           | CPTF_Mn         | 433015.3333 | 82315.08279 | 19.00973856 |
| UIJ65113.1 | acetyl-CoA_carboxylase_biotin_carboxyl_carrier_protein_[Bacillus_cereus]                                           | CPTF_Ni         | 419142      | 206458.66   | 49.25744974 |
| UIJ65113.1 | acetyl-CoA_carboxylase_biotin_carboxyl_carrier_protein_[Bacillus_cereus]                                           | CPTF_U          | 65414.5     | 60428.52045 | 92.37786799 |
| UIJ65113.1 | acetyl-CoA_carboxylase_biotin_carboxyl_carrier_protein_[Bacillus_cereus]                                           | CPTF_metals_mix | 393321.1333 | 107492.5337 | 27.32945795 |
| UIJ65113.1 | acetyl-CoA_carboxylase_biotin_carboxyl_carrier_protein_[Bacillus_cereus]                                           | CPTF_zcontrol   | 408417.6667 | 171640.9337 | 42.02583475 |
| UIJ65126.1 | elongation_factor_P_[Bacillus_cereus]                                                                              | CPTF_Al         | 0           | 0           | 0           |
| UIJ65126.1 | elongation_factor_P_[Bacillus_cereus]                                                                              | CPTF_Cd         | 0           | 0           | 0           |
| UIJ65126.1 | elongation_factor_P_[Bacillus_cereus]                                                                              | CPTF_Co         | 0           | 0           | 0           |
| UIJ65126.1 | elongation_factor_P_[Bacillus_cereus]                                                                              | CPTF_Cu         | 0           | 0           | 0           |
| UIJ65126.1 | elongation_factor_P_[Bacillus_cereus]                                                                              | CPTF_Fe         | 0           | 0           | 0           |
| UIJ65126.1 | elongation_factor_P_[Bacillus_cereus]                                                                              | CPTF_Mn         | 0           | 0           | 0           |
| UIJ65126.1 | elongation_factor_P_[Bacillus_cereus]                                                                              | CPTF_Ni         | 0           | 0           | 0           |
| UIJ65126.1 | elongation_factor_P_[Bacillus_cereus]                                                                              | CPTF_U          | 0           | 0           | 0           |
| UIJ65126.1 | elongation_factor_P_[Bacillus_cereus]                                                                              | CPTF_metals_mix | 532754.3333 | 260197.7912 | 48.84010789 |
| UIJ65126.1 | elongation_factor_P_[Bacillus_cereus]                                                                              | CPTF_zcontrol   | 0           | 0           | 0           |
| UIJ65131.1 | HAD_family_hydrolase_[Bacillus_cereus]                                                                             | CPTF_Al         | 266679      | 2351.995111 | 0.881957376 |

|            |                                                                            |                 |             |             |             |
|------------|----------------------------------------------------------------------------|-----------------|-------------|-------------|-------------|
| UIJ65131.1 | HAD_family_hydrolase_[Bacillus_cereus]                                     | CPTF_Cd         | 136631.3333 | 119569.7743 | 87.51270402 |
| UIJ65131.1 | HAD_family_hydrolase_[Bacillus_cereus]                                     | CPTF_Co         | 92643.66667 | 160463.5377 | 173.2050808 |
| UIJ65131.1 | HAD_family_hydrolase_[Bacillus_cereus]                                     | CPTF_Cu         | 159733      | 163802.3519 | 102.5475962 |
| UIJ65131.1 | HAD_family_hydrolase_[Bacillus_cereus]                                     | CPTF_Fe         | 218937.6667 | 190228.1365 | 86.88689315 |
| UIJ65131.1 | HAD_family_hydrolase_[Bacillus_cereus]                                     | CPTF_Mn         | 223807      | 199050.5656 | 88.93848967 |
| UIJ65131.1 | HAD_family_hydrolase_[Bacillus_cereus]                                     | CPTF_Ni         | 186028      | 162386.147  | 87.29123951 |
| UIJ65131.1 | HAD_family_hydrolase_[Bacillus_cereus]                                     | CPTF_U          | 244775.3333 | 246026.4    | 100.5111081 |
| UIJ65131.1 | HAD_family_hydrolase_[Bacillus_cereus]                                     | CPTF_metals_mix | 0           | 0           | 0           |
| UIJ65131.1 | HAD_family_hydrolase_[Bacillus_cereus]                                     | CPTF_zcontrol   | 223274.6667 | 199372.4634 | 89.29470878 |
| UIJ65132.1 | transcriptional_regulator_MntR_[Bacillus_cereus]                           | CPTF_Al         | 117367.5667 | 31503.53924 | 26.84177591 |
| UIJ65132.1 | transcriptional_regulator_MntR_[Bacillus_cereus]                           | CPTF_Cd         | 131114.2    | 56019.96188 | 42.72608297 |
| UIJ65132.1 | transcriptional_regulator_MntR_[Bacillus_cereus]                           | CPTF_Co         | 44465.6     | 39254.72876 | 88.28111789 |
| UIJ65132.1 | transcriptional_regulator_MntR_[Bacillus_cereus]                           | CPTF_Cu         | 116988.0667 | 63400.09744 | 54.19364492 |
| UIJ65132.1 | transcriptional_regulator_MntR_[Bacillus_cereus]                           | CPTF_Fe         | 79936.03333 | 7874.747349 | 9.85131113  |
| UIJ65132.1 | transcriptional_regulator_MntR_[Bacillus_cereus]                           | CPTF_Mn         | 69803.76667 | 5873.697478 | 8.414585285 |
| UIJ65132.1 | transcriptional_regulator_MntR_[Bacillus_cereus]                           | CPTF_Ni         | 78475.5     | 70689.03924 | 90.07784498 |
| UIJ65132.1 | transcriptional_regulator_MntR_[Bacillus_cereus]                           | CPTF_U          | 158287.7333 | 118867.8839 | 75.09608066 |
| UIJ65132.1 | transcriptional_regulator_MntR_[Bacillus_cereus]                           | CPTF_metals_mix | 60104.56667 | 53356.99301 | 88.77360901 |
| UIJ65132.1 | transcriptional_regulator_MntR_[Bacillus_cereus]                           | CPTF_zcontrol   | 113633.0333 | 33629.54053 | 29.59486299 |
| UIJ65137.1 | lipoate--protein_ligase_family_protein_[Bacillus_cereus]                   | CPTF_Al         | 0           | 0           | 0           |
| UIJ65137.1 | lipoate--protein_ligase_family_protein_[Bacillus_cereus]                   | CPTF_Cd         | 23096.5     | 40004.31148 | 173.2050808 |
| UIJ65137.1 | lipoate--protein_ligase_family_protein_[Bacillus_cereus]                   | CPTF_Co         | 0           | 0           | 0           |
| UIJ65137.1 | lipoate--protein_ligase_family_protein_[Bacillus_cereus]                   | CPTF_Cu         | 0           | 0           | 0           |
| UIJ65137.1 | lipoate--protein_ligase_family_protein_[Bacillus_cereus]                   | CPTF_Fe         | 0           | 0           | 0           |
| UIJ65137.1 | lipoate--protein_ligase_family_protein_[Bacillus_cereus]                   | CPTF_Mn         | 0           | 0           | 0           |
| UIJ65137.1 | lipoate--protein_ligase_family_protein_[Bacillus_cereus]                   | CPTF_Ni         | 0           | 0           | 0           |
| UIJ65137.1 | lipoate--protein_ligase_family_protein_[Bacillus_cereus]                   | CPTF_U          | 0           | 0           | 0           |
| UIJ65137.1 | lipoate--protein_ligase_family_protein_[Bacillus_cereus]                   | CPTF_metals_mix | 95203.03333 | 19194.38527 | 20.161527   |
| UIJ65137.1 | lipoate--protein_ligase_family_protein_[Bacillus_cereus]                   | CPTF_zcontrol   | 0           | 0           | 0           |
| UIJ65138.1 | rhodanese-like_domain-containing_protein_[Bacillus_cereus]                 | CPTF_Al         | 237928.6667 | 38807.54566 | 16.31058006 |
| UIJ65138.1 | rhodanese-like_domain-containing_protein_[Bacillus_cereus]                 | CPTF_Cd         | 239006.6667 | 55197.19001 | 23.09441439 |
| UIJ65138.1 | rhodanese-like_domain-containing_protein_[Bacillus_cereus]                 | CPTF_Co         | 303921.4333 | 42704.92719 | 14.05130488 |
| UIJ65138.1 | rhodanese-like_domain-containing_protein_[Bacillus_cereus]                 | CPTF_Cu         | 279946.9667 | 41850.18785 | 14.94932713 |
| UIJ65138.1 | rhodanese-like_domain-containing_protein_[Bacillus_cereus]                 | CPTF_Fe         | 226160.6667 | 32354.9032  | 14.3061584  |
| UIJ65138.1 | rhodanese-like_domain-containing_protein_[Bacillus_cereus]                 | CPTF_Mn         | 261537.3333 | 138906.3201 | 53.11146916 |
| UIJ65138.1 | rhodanese-like_domain-containing_protein_[Bacillus_cereus]                 | CPTF_Ni         | 245014.3333 | 21224.0892  | 8.662386772 |
| UIJ65138.1 | rhodanese-like_domain-containing_protein_[Bacillus_cereus]                 | CPTF_U          | 208698      | 31857.41936 | 15.26484171 |
| UIJ65138.1 | rhodanese-like_domain-containing_protein_[Bacillus_cereus]                 | CPTF_metals_mix | 962645.9667 | 85801.90634 | 8.913132066 |
| UIJ65138.1 | rhodanese-like_domain-containing_protein_[Bacillus_cereus]                 | CPTF_zcontrol   | 251367.3333 | 36120.47909 | 14.3695995  |
| UIJ65145.1 | aminomethyl-transferring_glycine_dehydrogenase_subunit_2_[Bacillus_cereus] | CPTF_Al         | 16317418.67 | 301464.7349 | 1.847502605 |
| UIJ65145.1 | aminomethyl-transferring_glycine_dehydrogenase_subunit_2_[Bacillus_cereus] | CPTF_Cd         | 17230979.97 | 543323.5845 | 3.153178667 |
| UIJ65145.1 | aminomethyl-transferring_glycine_dehydrogenase_subunit_2_[Bacillus_cereus] | CPTF_Co         | 16626565.2  | 1968062.933 | 14.83685812 |
| UIJ65145.1 | aminomethyl-transferring_glycine_dehydrogenase_subunit_2_[Bacillus_cereus] | CPTF_Cu         | 15485017.1  | 2281087.802 | 14.73093499 |
| UIJ65145.1 | aminomethyl-transferring_glycine_dehydrogenase_subunit_2_[Bacillus_cereus] | CPTF_Fe         | 16055899.87 | 1461800.968 | 9.104447465 |
| UIJ65145.1 | aminomethyl-transferring_glycine_dehydrogenase_subunit_2_[Bacillus_cereus] | CPTF_Mn         | 16387025.3  | 2154409.113 | 13.14704209 |
| UIJ65145.1 | aminomethyl-transferring_glycine_dehydrogenase_subunit_2_[Bacillus_cereus] | CPTF_Ni         | 15191822.33 | 1163762.599 | 7.660454248 |
| UIJ65145.1 | aminomethyl-transferring_glycine_dehydrogenase_subunit_2_[Bacillus_cereus] | CPTF_U          | 16921429.8  | 2797101.825 | 16.52993782 |
| UIJ65145.1 | aminomethyl-transferring_glycine_dehydrogenase_subunit_2_[Bacillus_cereus] | CPTF_metals_mix | 19591188.9  | 1010486.535 | 5.157862241 |
| UIJ65145.1 | aminomethyl-transferring_glycine_dehydrogenase_subunit_2_[Bacillus_cereus] | CPTF_zcontrol   | 16549490.17 | 630388.9096 | 3.809113775 |
| UIJ65146.1 | aminomethyl-transferring_glycine_dehydrogenase_subunit_1_[Bacillus_cereus] | CPTF_Al         | 7341053.933 | 444548.7471 | 6.05652924  |
| UIJ65146.1 | aminomethyl-transferring_glycine_dehydrogenase_subunit_1_[Bacillus_cereus] | CPTF_Cd         | 7459886.333 | 227269.1161 | 3.046549317 |
| UIJ65146.1 | aminomethyl-transferring_glycine_dehydrogenase_subunit_1_[Bacillus_cereus] | CPTF_Co         | 6711940.467 | 668933.4187 | 9.966319309 |
| UIJ65146.1 | aminomethyl-transferring_glycine_dehydrogenase_subunit_1_[Bacillus_cereus] | CPTF_Cu         | 6513840.3   | 89985.78624 | 1.381455211 |
| UIJ65146.1 | aminomethyl-transferring_glycine_dehydrogenase_subunit_1_[Bacillus_cereus] | CPTF_Fe         | 6977311.9   | 351507.8621 | 5.037869413 |
| UIJ65146.1 | aminomethyl-transferring_glycine_dehydrogenase_subunit_1_[Bacillus_cereus] | CPTF_Mn         | 6485650     | 818088.5755 | 12.61382553 |
| UIJ65146.1 | aminomethyl-transferring_glycine_dehydrogenase_subunit_1_[Bacillus_cereus] | CPTF_Ni         | 5332707.2   | 785659.8569 | 14.73285195 |
| UIJ65146.1 | aminomethyl-transferring_glycine_dehydrogenase_subunit_1_[Bacillus_cereus] | CPTF_U          | 5538932.667 | 224779.2964 | 4.058169867 |
| UIJ65146.1 | aminomethyl-transferring_glycine_dehydrogenase_subunit_1_[Bacillus_cereus] | CPTF_metals_mix | 5695902.467 | 372256.9635 | 6.535522082 |
| UIJ65146.1 | aminomethyl-transferring_glycine_dehydrogenase_subunit_1_[Bacillus_cereus] | CPTF_zcontrol   | 6931869     | 471708.0456 | 6.804918639 |
| UIJ65147.1 | glycine_cleavage_system_aminomethyltransferase_GcvT_[Bacillus_cereus]      | CPTF_Al         | 8253857.267 | 684281.8875 | 8.290449731 |
| UIJ65147.1 | glycine_cleavage_system_aminomethyltransferase_GcvT_[Bacillus_cereus]      | CPTF_Cd         | 9065086.067 | 752303.9422 | 8.298916709 |

|            |                                                                                                     |                 |              |             |             |
|------------|-----------------------------------------------------------------------------------------------------|-----------------|--------------|-------------|-------------|
| UIJ65147.1 | glycine_cleavage_system_aminomethyltransferase_GcvT_[Bacillus_cereus]                               | CPTF_Co         | 7961615.8    | 467364.0071 | 5.87021553  |
| UIJ65147.1 | glycine_cleavage_system_aminomethyltransferase_GcvT_[Bacillus_cereus]                               | CPTF_Cu         | 7566758.133  | 698526.879  | 9.23152117  |
| UIJ65147.1 | glycine_cleavage_system_aminomethyltransferase_GcvT_[Bacillus_cereus]                               | CPTF_Fe         | 7531270.567  | 920680.9375 | 12.22477574 |
| UIJ65147.1 | glycine_cleavage_system_aminomethyltransferase_GcvT_[Bacillus_cereus]                               | CPTF_Mn         | 8130290.933  | 2498517.308 | 30.73097049 |
| UIJ65147.1 | glycine_cleavage_system_aminomethyltransferase_GcvT_[Bacillus_cereus]                               | CPTF_Ni         | 6314941.867  | 1101427.157 | 17.44160405 |
| UIJ65147.1 | glycine_cleavage_system_aminomethyltransferase_GcvT_[Bacillus_cereus]                               | CPTF_U          | 5580850.467  | 337396.5464 | 6.045611657 |
| UIJ65147.1 | glycine_cleavage_system_aminomethyltransferase_GcvT_[Bacillus_cereus]                               | CPTF_metals_mix | 11703525.633 | 888820.7148 | 7.594469757 |
| UIJ65147.1 | glycine_cleavage_system_aminomethyltransferase_GcvT_[Bacillus_cereus]                               | CPTF_zcontrol   | 7640444.267  | 469360.7795 | 6.143108479 |
| UIJ65168.1 | 2OG-Fe(II)_oxygenase_[Bacillus_cereus]                                                              | CPTF_Al         | 12259.96667  | 21234.88517 | 173.2050808 |
| UIJ65168.1 | 2OG-Fe(II)_oxygenase_[Bacillus_cereus]                                                              | CPTF_Cd         | 74988.9      | 22560.14337 | 30.08464368 |
| UIJ65168.1 | 2OG-Fe(II)_oxygenase_[Bacillus_cereus]                                                              | CPTF_Co         | 23643.76667  | 40952.20515 | 173.2050808 |
| UIJ65168.1 | 2OG-Fe(II)_oxygenase_[Bacillus_cereus]                                                              | CPTF_Cu         | 22820.56667  | 21584.53727 | 94.58370418 |
| UIJ65168.1 | 2OG-Fe(II)_oxygenase_[Bacillus_cereus]                                                              | CPTF_Fe         | 0            | 0           | 0           |
| UIJ65168.1 | 2OG-Fe(II)_oxygenase_[Bacillus_cereus]                                                              | CPTF_Mn         | 20290.76667  | 35144.63879 | 173.2050808 |
| UIJ65168.1 | 2OG-Fe(II)_oxygenase_[Bacillus_cereus]                                                              | CPTF_Ni         | 0            | 0           | 0           |
| UIJ65168.1 | 2OG-Fe(II)_oxygenase_[Bacillus_cereus]                                                              | CPTF_U          | 0            | 0           | 0           |
| UIJ65168.1 | 2OG-Fe(II)_oxygenase_[Bacillus_cereus]                                                              | CPTF_metals_mix | 117096.9667  | 34025.31814 | 29.05738646 |
| UIJ65168.1 | 2OG-Fe(II)_oxygenase_[Bacillus_cereus]                                                              | CPTF_zcontrol   | 16288.7      | 28212.85599 | 173.2050808 |
| UIJ65175.1 | helix-turn-helix_domain-containing_protein_[Bacillus_cereus]                                        | CPTF_Al         | 7215.3       | 12497.26619 | 173.2050808 |
| UIJ65175.1 | helix-turn-helix_domain-containing_protein_[Bacillus_cereus]                                        | CPTF_Cd         | 20543.1      | 35581.69294 | 173.2050808 |
| UIJ65175.1 | helix-turn-helix_domain-containing_protein_[Bacillus_cereus]                                        | CPTF_Co         | 40115.66667  | 35598.30118 | 88.73914892 |
| UIJ65175.1 | helix-turn-helix_domain-containing_protein_[Bacillus_cereus]                                        | CPTF_Cu         | 88133.4      | 21936.63709 | 24.89026532 |
| UIJ65175.1 | helix-turn-helix_domain-containing_protein_[Bacillus_cereus]                                        | CPTF_Fe         | 23426.13333  | 40575.25316 | 173.2050808 |
| UIJ65175.1 | helix-turn-helix_domain-containing_protein_[Bacillus_cereus]                                        | CPTF_Mn         | 6216.16667   | 10766.71649 | 173.2050808 |
| UIJ65175.1 | helix-turn-helix_domain-containing_protein_[Bacillus_cereus]                                        | CPTF_Ni         | 26780.2      | 25931.57639 | 96.83115283 |
| UIJ65175.1 | helix-turn-helix_domain-containing_protein_[Bacillus_cereus]                                        | CPTF_U          | 0            | 0           | 0           |
| UIJ65175.1 | helix-turn-helix_domain-containing_protein_[Bacillus_cereus]                                        | CPTF_metals_mix | 1858073.3    | 75336.44755 | 4.054546586 |
| UIJ65175.1 | helix-turn-helix_domain-containing_protein_[Bacillus_cereus]                                        | CPTF_zcontrol   | 15868.96667  | 27485.85653 | 173.2050808 |
| UIJ65177.1 | L-cystine_transporter_[Bacillus_cereus]                                                             | CPTF_Al         | 28297.2      | 30239.25244 | 106.8630552 |
| UIJ65177.1 | L-cystine_transporter_[Bacillus_cereus]                                                             | CPTF_Cd         | 71171.33333  | 53305.13983 | 74.89692456 |
| UIJ65177.1 | L-cystine_transporter_[Bacillus_cereus]                                                             | CPTF_Co         | 52393.33333  | 47228.47865 | 90.14215291 |
| UIJ65177.1 | L-cystine_transporter_[Bacillus_cereus]                                                             | CPTF_Cu         | 48831.46667  | 14901.76419 | 30.51672458 |
| UIJ65177.1 | L-cystine_transporter_[Bacillus_cereus]                                                             | CPTF_Fe         | 47922        | 23459.24403 | 48.95297364 |
| UIJ65177.1 | L-cystine_transporter_[Bacillus_cereus]                                                             | CPTF_Mn         | 27264.7      | 27095.17168 | 99.37821316 |
| UIJ65177.1 | L-cystine_transporter_[Bacillus_cereus]                                                             | CPTF_Ni         | 21831.8      | 37813.78682 | 173.2050808 |
| UIJ65177.1 | L-cystine_transporter_[Bacillus_cereus]                                                             | CPTF_U          | 20810.5      | 36044.84333 | 173.2050808 |
| UIJ65177.1 | L-cystine_transporter_[Bacillus_cereus]                                                             | CPTF_metals_mix | 113167.5333  | 33533.54817 | 29.6317744  |
| UIJ65177.1 | L-cystine_transporter_[Bacillus_cereus]                                                             | CPTF_zcontrol   | 15971.9      | 27664.14229 | 173.2050808 |
| UIJ65181.1 | hypothetical_protein_LW858_19795_[Bacillus_cereus]                                                  | CPTF_Al         | 120627.2667  | 64544.62505 | 53.50749199 |
| UIJ65181.1 | hypothetical_protein_LW858_19795_[Bacillus_cereus]                                                  | CPTF_Cd         | 145237       | 60264.34141 | 41.49379387 |
| UIJ65181.1 | hypothetical_protein_LW858_19795_[Bacillus_cereus]                                                  | CPTF_Co         | 129414.9667  | 79594.58712 | 61.50338649 |
| UIJ65181.1 | hypothetical_protein_LW858_19795_[Bacillus_cereus]                                                  | CPTF_Cu         | 92828.8      | 71164.86348 | 76.66248349 |
| UIJ65181.1 | hypothetical_protein_LW858_19795_[Bacillus_cereus]                                                  | CPTF_Fe         | 49286.96667  | 43225.26709 | 87.70121192 |
| UIJ65181.1 | hypothetical_protein_LW858_19795_[Bacillus_cereus]                                                  | CPTF_Mn         | 89204.46667  | 39708.72864 | 44.51428289 |
| UIJ65181.1 | hypothetical_protein_LW858_19795_[Bacillus_cereus]                                                  | CPTF_Ni         | 78043.7      | 9536.113389 | 12.21894066 |
| UIJ65181.1 | hypothetical_protein_LW858_19795_[Bacillus_cereus]                                                  | CPTF_U          | 19301.3      | 22577.19582 | 116.9724102 |
| UIJ65181.1 | hypothetical_protein_LW858_19795_[Bacillus_cereus]                                                  | CPTF_metals_mix | 104943.5667  | 64991.13767 | 61.92960629 |
| UIJ65181.1 | hypothetical_protein_LW858_19795_[Bacillus_cereus]                                                  | CPTF_zcontrol   | 89141.46667  | 7799.416976 | 8.749482443 |
| UIJ65186.1 | bifunctional_homocysteine_S-methyltransferase/methylenetetrahydrofolate_reductase_[Bacillus_cereus] | CPTF_Al         | 273830       | 237163.6849 | 86.60982541 |
| UIJ65186.1 | bifunctional_homocysteine_S-methyltransferase/methylenetetrahydrofolate_reductase_[Bacillus_cereus] | CPTF_Cd         | 246959.6667  | 427746.6901 | 173.2050808 |
| UIJ65186.1 | bifunctional_homocysteine_S-methyltransferase/methylenetetrahydrofolate_reductase_[Bacillus_cereus] | CPTF_Co         | 361826.6667  | 626702.1702 | 173.2050808 |
| UIJ65186.1 | bifunctional_homocysteine_S-methyltransferase/methylenetetrahydrofolate_reductase_[Bacillus_cereus] | CPTF_Cu         | 698944.3333  | 694315.7353 | 99.33777301 |
| UIJ65186.1 | bifunctional_homocysteine_S-methyltransferase/methylenetetrahydrofolate_reductase_[Bacillus_cereus] | CPTF_Fe         | 292758.3333  | 507072.3077 | 173.2050808 |
| UIJ65186.1 | bifunctional_homocysteine_S-methyltransferase/methylenetetrahydrofolate_reductase_[Bacillus_cereus] | CPTF_Mn         | 711700.6667  | 689888.1097 | 96.93515013 |
| UIJ65186.1 | bifunctional_homocysteine_S-methyltransferase/methylenetetrahydrofolate_reductase_[Bacillus_cereus] | CPTF_Ni         | 394472.6667  | 347679.5865 | 88.13781433 |
| UIJ65186.1 | bifunctional_homocysteine_S-methyltransferase/methylenetetrahydrofolate_reductase_[Bacillus_cereus] | CPTF_U          | 785573       | 774670.4617 | 98.61215466 |
| UIJ65186.1 | bifunctional_homocysteine_S-methyltransferase/methylenetetrahydrofolate_reductase_[Bacillus_cereus] | CPTF_metals_mix | 0            | 0           | 0           |
| UIJ65186.1 | bifunctional_homocysteine_S-methyltransferase/methylenetetrahydrofolate_reductase_[Bacillus_cereus] | CPTF_zcontrol   | 570784       | 17937.39839 | 3.142589559 |
| UIJ65187.1 | cystathionine_gamma-synthase/O-acetylhomoserine_thiolylase_[Bacillus_cereus]                        | CPTF_Al         | 29074.56667  | 50358.62667 | 173.2050808 |
| UIJ65187.1 | cystathionine_gamma-synthase/O-acetylhomoserine_thiolylase_[Bacillus_cereus]                        | CPTF_Cd         | 21105.5      | 36555.79832 | 173.2050808 |
| UIJ65187.1 | cystathionine_gamma-synthase/O-acetylhomoserine_thiolylase_[Bacillus_cereus]                        | CPTF_Co         | 48121.73333  | 44985.46526 | 93.48263693 |

|            |                                                                              |                 |             |             |             |
|------------|------------------------------------------------------------------------------|-----------------|-------------|-------------|-------------|
| UIJ65187.1 | cystathionine_gamma-synthase/O-acetylhomoserine_thiolylase_[Bacillus_cereus] | CPTF_Cu         | 0           | 0           | 0           |
| UIJ65187.1 | cystathionine_gamma-synthase/O-acetylhomoserine_thiolylase_[Bacillus_cereus] | CPTF_Fe         | 59003.4     | 16267.90324 | 27.57112852 |
| UIJ65187.1 | cystathionine_gamma-synthase/O-acetylhomoserine_thiolylase_[Bacillus_cereus] | CPTF_Mn         | 28268.4     | 48962.30505 | 173.2050808 |
| UIJ65187.1 | cystathionine_gamma-synthase/O-acetylhomoserine_thiolylase_[Bacillus_cereus] | CPTF_Ni         | 19092.63333 | 33069.41098 | 173.2050808 |
| UIJ65187.1 | cystathionine_gamma-synthase/O-acetylhomoserine_thiolylase_[Bacillus_cereus] | CPTF_U          | 56720.9     | 54890.63892 | 96.77321574 |
| UIJ65187.1 | cystathionine_gamma-synthase/O-acetylhomoserine_thiolylase_[Bacillus_cereus] | CPTF_metals_mix | 3694.8      | 6399.581324 | 173.2050808 |
| UIJ65187.1 | cystathionine_gamma-synthase/O-acetylhomoserine_thiolylase_[Bacillus_cereus] | CPTF_zcontrol   | 25105.93333 | 43484.7521  | 173.2050808 |
| UIJ65190.1 | metalloregulator_ArsR/SmtB_family_transcription_factor_[Bacillus_cereus]     | CPTF_Al         | 2040767.167 | 113686.4076 | 5.570768165 |
| UIJ65190.1 | metalloregulator_ArsR/SmtB_family_transcription_factor_[Bacillus_cereus]     | CPTF_Cd         | 2088054.1   | 316371.0555 | 15.1514779  |
| UIJ65190.1 | metalloregulator_ArsR/SmtB_family_transcription_factor_[Bacillus_cereus]     | CPTF_Co         | 2271279.667 | 131324.1024 | 5.781943296 |
| UIJ65190.1 | metalloregulator_ArsR/SmtB_family_transcription_factor_[Bacillus_cereus]     | CPTF_Cu         | 1758968     | 101966.505  | 5.796950543 |
| UIJ65190.1 | metalloregulator_ArsR/SmtB_family_transcription_factor_[Bacillus_cereus]     | CPTF_Fe         | 2133331.133 | 370310.2526 | 17.35831099 |
| UIJ65190.1 | metalloregulator_ArsR/SmtB_family_transcription_factor_[Bacillus_cereus]     | CPTF_Mn         | 2325280.033 | 485515.1958 | 20.87985915 |
| UIJ65190.1 | metalloregulator_ArsR/SmtB_family_transcription_factor_[Bacillus_cereus]     | CPTF_Ni         | 2206890.667 | 386583.0961 | 17.51709325 |
| UIJ65190.1 | metalloregulator_ArsR/SmtB_family_transcription_factor_[Bacillus_cereus]     | CPTF_U          | 863333      | 9097.38979  | 1.05375212  |
| UIJ65190.1 | metalloregulator_ArsR/SmtB_family_transcription_factor_[Bacillus_cereus]     | CPTF_metals_mix | 1126068     | 94458.12356 | 8.388314344 |
| UIJ65190.1 | metalloregulator_ArsR/SmtB_family_transcription_factor_[Bacillus_cereus]     | CPTF_zcontrol   | 2028286     | 242126.5626 | 11.93749612 |
| UIJ65192.1 | MBL_fold_metallo-hydrolase_[Bacillus_cereus]                                 | CPTF_Al         | 186874.3333 | 24094.86174 | 12.8936175  |
| UIJ65192.1 | MBL_fold_metallo-hydrolase_[Bacillus_cereus]                                 | CPTF_Cd         | 193808.3333 | 16402.44132 | 8.463228098 |
| UIJ65192.1 | MBL_fold_metallo-hydrolase_[Bacillus_cereus]                                 | CPTF_Co         | 219019.6667 | 19509.86895 | 8.907816017 |
| UIJ65192.1 | MBL_fold_metallo-hydrolase_[Bacillus_cereus]                                 | CPTF_Cu         | 202516      | 3820.176305 | 1.886357772 |
| UIJ65192.1 | MBL_fold_metallo-hydrolase_[Bacillus_cereus]                                 | CPTF_Fe         | 219196.6667 | 8898.713915 | 4.059693995 |
| UIJ65192.1 | MBL_fold_metallo-hydrolase_[Bacillus_cereus]                                 | CPTF_Mn         | 226768      | 52847.80655 | 23.30479016 |
| UIJ65192.1 | MBL_fold_metallo-hydrolase_[Bacillus_cereus]                                 | CPTF_Ni         | 193587      | 37764.80212 | 19.5079226  |
| UIJ65192.1 | MBL_fold_metallo-hydrolase_[Bacillus_cereus]                                 | CPTF_U          | 224034.6667 | 20662.2305  | 9.22278271  |
| UIJ65192.1 | MBL_fold_metallo-hydrolase_[Bacillus_cereus]                                 | CPTF_metals_mix | 146600.6667 | 26015.27217 | 17.74567113 |
| UIJ65192.1 | MBL_fold_metallo-hydrolase_[Bacillus_cereus]                                 | CPTF_zcontrol   | 201268.6667 | 40763.32883 | 20.25319167 |
| UIJ65194.1 | glucokinase_[Bacillus_cereus]                                                | CPTF_Al         | 2800016.767 | 95690.64805 | 3.41750268  |
| UIJ65194.1 | glucokinase_[Bacillus_cereus]                                                | CPTF_Cd         | 2984120.833 | 74021.83044 | 2.480523899 |
| UIJ65194.1 | glucokinase_[Bacillus_cereus]                                                | CPTF_Co         | 2666500.333 | 387312.7231 | 14.52513312 |
| UIJ65194.1 | glucokinase_[Bacillus_cereus]                                                | CPTF_Cu         | 2468267.5   | 390938.0692 | 15.83856163 |
| UIJ65194.1 | glucokinase_[Bacillus_cereus]                                                | CPTF_Fe         | 2743596.133 | 151362.5825 | 5.516941091 |
| UIJ65194.1 | glucokinase_[Bacillus_cereus]                                                | CPTF_Mn         | 2530180     | 512996.3589 | 20.27509343 |
| UIJ65194.1 | glucokinase_[Bacillus_cereus]                                                | CPTF_Ni         | 2100987.167 | 390650.9605 | 18.59368618 |
| UIJ65194.1 | glucokinase_[Bacillus_cereus]                                                | CPTF_U          | 2216078.4   | 586542.1521 | 26.46757227 |
| UIJ65194.1 | glucokinase_[Bacillus_cereus]                                                | CPTF_metals_mix | 2997928.467 | 251895.2353 | 8.402309732 |
| UIJ65194.1 | glucokinase_[Bacillus_cereus]                                                | CPTF_zcontrol   | 2819426.8   | 165767.327  | 5.879469083 |
| UIJ65199.1 | phosphate_signaling_complex_protein_PhoU_[Bacillus_cereus]                   | CPTF_Al         | 163302.6667 | 26811.2279  | 16.41812007 |
| UIJ65199.1 | phosphate_signaling_complex_protein_PhoU_[Bacillus_cereus]                   | CPTF_Cd         | 0           | 0           | 0           |
| UIJ65199.1 | phosphate_signaling_complex_protein_PhoU_[Bacillus_cereus]                   | CPTF_Co         | 61619       | 106727.2387 | 173.2050808 |
| UIJ65199.1 | phosphate_signaling_complex_protein_PhoU_[Bacillus_cereus]                   | CPTF_Cu         | 116450.5    | 23608.91977 | 20.27378137 |
| UIJ65199.1 | phosphate_signaling_complex_protein_PhoU_[Bacillus_cereus]                   | CPTF_Fe         | 0           | 0           | 0           |
| UIJ65199.1 | phosphate_signaling_complex_protein_PhoU_[Bacillus_cereus]                   | CPTF_Mn         | 0           | 0           | 0           |
| UIJ65199.1 | phosphate_signaling_complex_protein_PhoU_[Bacillus_cereus]                   | CPTF_Ni         | 27689.33333 | 47959.33216 | 173.2050808 |
| UIJ65199.1 | phosphate_signaling_complex_protein_PhoU_[Bacillus_cereus]                   | CPTF_U          | 65309       | 113118.5062 | 173.2050808 |
| UIJ65199.1 | phosphate_signaling_complex_protein_PhoU_[Bacillus_cereus]                   | CPTF_metals_mix | 0           | 0           | 0           |
| UIJ65199.1 | phosphate_signaling_complex_protein_PhoU_[Bacillus_cereus]                   | CPTF_zcontrol   | 47747.33333 | 82700.80726 | 173.2050808 |
| UIJ65204.1 | penicillin-binding_protein_2_[Bacillus_cereus]                               | CPTF_Al         | 62533.8     | 68503.17348 | 109.5458352 |
| UIJ65204.1 | penicillin-binding_protein_2_[Bacillus_cereus]                               | CPTF_Cd         | 26366       | 45667.25159 | 173.2050808 |
| UIJ65204.1 | penicillin-binding_protein_2_[Bacillus_cereus]                               | CPTF_Co         | 24705.66667 | 42791.4699  | 173.2050808 |
| UIJ65204.1 | penicillin-binding_protein_2_[Bacillus_cereus]                               | CPTF_Cu         | 47942.33333 | 83038.55717 | 173.2050808 |
| UIJ65204.1 | penicillin-binding_protein_2_[Bacillus_cereus]                               | CPTF_Fe         | 36499.33333 | 63218.69978 | 173.2050808 |
| UIJ65204.1 | penicillin-binding_protein_2_[Bacillus_cereus]                               | CPTF_Mn         | 0           | 0           | 0           |
| UIJ65204.1 | penicillin-binding_protein_2_[Bacillus_cereus]                               | CPTF_Ni         | 0           | 0           | 0           |
| UIJ65204.1 | penicillin-binding_protein_2_[Bacillus_cereus]                               | CPTF_U          | 22591.06667 | 39128.87526 | 173.2050808 |
| UIJ65204.1 | penicillin-binding_protein_2_[Bacillus_cereus]                               | CPTF_metals_mix | 74370.26667 | 43659.98612 | 58.70623849 |
| UIJ65204.1 | penicillin-binding_protein_2_[Bacillus_cereus]                               | CPTF_zcontrol   | 0           | 0           | 0           |
| UIJ65206.1 | superoxide_dismutase_[Mn]_[Bacillus_cereus]                                  | CPTF_Al         | 18108266.07 | 1076546.45  | 5.945055402 |
| UIJ65206.1 | superoxide_dismutase_[Mn]_[Bacillus_cereus]                                  | CPTF_Cd         | 21652885.6  | 1251987.577 | 5.782081891 |
| UIJ65206.1 | superoxide_dismutase_[Mn]_[Bacillus_cereus]                                  | CPTF_Co         | 16051875.17 | 738660.3675 | 4.60170765  |
| UIJ65206.1 | superoxide_dismutase_[Mn]_[Bacillus_cereus]                                  | CPTF_Cu         | 16467061.07 | 449196.2553 | 2.727847145 |

|            |                                                                      |                 |             |             |             |
|------------|----------------------------------------------------------------------|-----------------|-------------|-------------|-------------|
| UIJ65206.1 | superoxide_dismutase_[Mn]_[Bacillus_cereus]                          | CPTF_Fe         | 17376375.47 | 1137645.421 | 6.547081256 |
| UIJ65206.1 | superoxide_dismutase_[Mn]_[Bacillus_cereus]                          | CPTF_Mn         | 16691867.47 | 874796.1334 | 5.24085238  |
| UIJ65206.1 | superoxide_dismutase_[Mn]_[Bacillus_cereus]                          | CPTF_Ni         | 13343695    | 706774.8244 | 5.296694989 |
| UIJ65206.1 | superoxide_dismutase_[Mn]_[Bacillus_cereus]                          | CPTF_U          | 15316712.1  | 658719.2524 | 4.300657009 |
| UIJ65206.1 | superoxide_dismutase_[Mn]_[Bacillus_cereus]                          | CPTF_metals_mix | 19106882.67 | 212031.5337 | 1.109712858 |
| UIJ65206.1 | superoxide_dismutase_[Mn]_[Bacillus_cereus]                          | CPTF_zcontrol   | 16502492.9  | 1154581.58  | 6.996407071 |
| UIJ65207.1 | DUF1189_domain-containing_protein_[Bacillus_cereus]                  | CPTF_AI         | 81470.36667 | 30507.32174 | 37.44591192 |
| UIJ65207.1 | DUF1189_domain-containing_protein_[Bacillus_cereus]                  | CPTF_Cd         | 103731.3    | 19984.77599 | 19.26590719 |
| UIJ65207.1 | DUF1189_domain-containing_protein_[Bacillus_cereus]                  | CPTF_Co         | 55495.73333 | 28704.40798 | 51.72363037 |
| UIJ65207.1 | DUF1189_domain-containing_protein_[Bacillus_cereus]                  | CPTF_Cu         | 81496.1     | 6961.914526 | 8.542635201 |
| UIJ65207.1 | DUF1189_domain-containing_protein_[Bacillus_cereus]                  | CPTF_Fe         | 77399.93333 | 12291.66694 | 15.88072032 |
| UIJ65207.1 | DUF1189_domain-containing_protein_[Bacillus_cereus]                  | CPTF_Mn         | 57870.4     | 51141.08447 | 88.37174872 |
| UIJ65207.1 | DUF1189_domain-containing_protein_[Bacillus_cereus]                  | CPTF_Ni         | 18003.96667 | 31183.785   | 173.2050808 |
| UIJ65207.1 | DUF1189_domain-containing_protein_[Bacillus_cereus]                  | CPTF_U          | 16633.56667 | 28810.18258 | 173.2050808 |
| UIJ65207.1 | DUF1189_domain-containing_protein_[Bacillus_cereus]                  | CPTF_metals_mix | 110213      | 2716.168809 | 2.464472258 |
| UIJ65207.1 | DUF1189_domain-containing_protein_[Bacillus_cereus]                  | CPTF_zcontrol   | 46329.93333 | 49384.29944 | 106.5926408 |
| UIJ65211.1 | metal_ABC_transporter_ATP-binding_protein_[Bacillus_cereus]          | CPTF_AI         | 0           | 0           | 0           |
| UIJ65211.1 | metal_ABC_transporter_ATP-binding_protein_[Bacillus_cereus]          | CPTF_Cd         | 0           | 0           | 0           |
| UIJ65211.1 | metal_ABC_transporter_ATP-binding_protein_[Bacillus_cereus]          | CPTF_Co         | 68586.66667 | 59417.4977  | 86.63126609 |
| UIJ65211.1 | metal_ABC_transporter_ATP-binding_protein_[Bacillus_cereus]          | CPTF_Cu         | 104885.6667 | 90839.77254 | 86.60837598 |
| UIJ65211.1 | metal_ABC_transporter_ATP-binding_protein_[Bacillus_cereus]          | CPTF_Fe         | 0           | 0           | 0           |
| UIJ65211.1 | metal_ABC_transporter_ATP-binding_protein_[Bacillus_cereus]          | CPTF_Mn         | 47495.93333 | 42071.5051  | 88.57917331 |
| UIJ65211.1 | metal_ABC_transporter_ATP-binding_protein_[Bacillus_cereus]          | CPTF_Ni         | 0           | 0           | 0           |
| UIJ65211.1 | metal_ABC_transporter_ATP-binding_protein_[Bacillus_cereus]          | CPTF_U          | 90523.33333 | 81495.37764 | 90.02692968 |
| UIJ65211.1 | metal_ABC_transporter_ATP-binding_protein_[Bacillus_cereus]          | CPTF_metals_mix | 0           | 0           | 0           |
| UIJ65211.1 | metal_ABC_transporter_ATP-binding_protein_[Bacillus_cereus]          | CPTF_zcontrol   | 20568.66667 | 35625.97571 | 173.2050808 |
| UIJ65214.1 | deoxyribonuclease_IV_[Bacillus_cereus]                               | CPTF_AI         | 107238      | 185741.6645 | 173.2050808 |
| UIJ65214.1 | deoxyribonuclease_IV_[Bacillus_cereus]                               | CPTF_Cd         | 0           | 0           | 0           |
| UIJ65214.1 | deoxyribonuclease_IV_[Bacillus_cereus]                               | CPTF_Co         | 0           | 0           | 0           |
| UIJ65214.1 | deoxyribonuclease_IV_[Bacillus_cereus]                               | CPTF_Cu         | 137164.6667 | 237576.1717 | 173.2050808 |
| UIJ65214.1 | deoxyribonuclease_IV_[Bacillus_cereus]                               | CPTF_Fe         | 0           | 0           | 0           |
| UIJ65214.1 | deoxyribonuclease_IV_[Bacillus_cereus]                               | CPTF_Mn         | 0           | 0           | 0           |
| UIJ65214.1 | deoxyribonuclease_IV_[Bacillus_cereus]                               | CPTF_Ni         | 0           | 0           | 0           |
| UIJ65214.1 | deoxyribonuclease_IV_[Bacillus_cereus]                               | CPTF_U          | 0           | 0           | 0           |
| UIJ65214.1 | deoxyribonuclease_IV_[Bacillus_cereus]                               | CPTF_metals_mix | 375320.3333 | 32246.06925 | 8.591612655 |
| UIJ65214.1 | deoxyribonuclease_IV_[Bacillus_cereus]                               | CPTF_zcontrol   | 105135.3333 | 182099.739  | 173.2050808 |
| UIJ65215.1 | DEAD/DEAH_box_helicase_[Bacillus_cereus]                             | CPTF_AI         | 568600.4333 | 91187.47137 | 16.03717937 |
| UIJ65215.1 | DEAD/DEAH_box_helicase_[Bacillus_cereus]                             | CPTF_Cd         | 560331.5333 | 117190.7937 | 20.91454554 |
| UIJ65215.1 | DEAD/DEAH_box_helicase_[Bacillus_cereus]                             | CPTF_Co         | 661659.6    | 67117.56532 | 10.14382098 |
| UIJ65215.1 | DEAD/DEAH_box_helicase_[Bacillus_cereus]                             | CPTF_Cu         | 610068.9333 | 64118.56821 | 10.510053   |
| UIJ65215.1 | DEAD/DEAH_box_helicase_[Bacillus_cereus]                             | CPTF_Fe         | 583030.1667 | 60882.1281  | 10.44236329 |
| UIJ65215.1 | DEAD/DEAH_box_helicase_[Bacillus_cereus]                             | CPTF_Mn         | 582703.3    | 46803.59581 | 8.032148746 |
| UIJ65215.1 | DEAD/DEAH_box_helicase_[Bacillus_cereus]                             | CPTF_Ni         | 541878      | 45105.2507  | 8.323875614 |
| UIJ65215.1 | DEAD/DEAH_box_helicase_[Bacillus_cereus]                             | CPTF_U          | 642663.3333 | 245211.813  | 38.15556299 |
| UIJ65215.1 | DEAD/DEAH_box_helicase_[Bacillus_cereus]                             | CPTF_metals_mix | 469674.5    | 141884.096  | 30.20902689 |
| UIJ65215.1 | DEAD/DEAH_box_helicase_[Bacillus_cereus]                             | CPTF_zcontrol   | 684958.5333 | 114000.0778 | 16.64335464 |
| UIJ65217.1 | 4-hydroxy-3-methylbut-2-enyl_diphosphate_reductase_[Bacillus_cereus] | CPTF_AI         | 0           | 0           | 0           |
| UIJ65217.1 | 4-hydroxy-3-methylbut-2-enyl_diphosphate_reductase_[Bacillus_cereus] | CPTF_Cd         | 0           | 0           | 0           |
| UIJ65217.1 | 4-hydroxy-3-methylbut-2-enyl_diphosphate_reductase_[Bacillus_cereus] | CPTF_Co         | 43943.26667 | 38700.96533 | 88.07029669 |
| UIJ65217.1 | 4-hydroxy-3-methylbut-2-enyl_diphosphate_reductase_[Bacillus_cereus] | CPTF_Cu         | 0           | 0           | 0           |
| UIJ65217.1 | 4-hydroxy-3-methylbut-2-enyl_diphosphate_reductase_[Bacillus_cereus] | CPTF_Fe         | 6195.833333 | 10731.49813 | 173.2050808 |
| UIJ65217.1 | 4-hydroxy-3-methylbut-2-enyl_diphosphate_reductase_[Bacillus_cereus] | CPTF_Mn         | 0           | 0           | 0           |
| UIJ65217.1 | 4-hydroxy-3-methylbut-2-enyl_diphosphate_reductase_[Bacillus_cereus] | CPTF_Ni         | 0           | 0           | 0           |
| UIJ65217.1 | 4-hydroxy-3-methylbut-2-enyl_diphosphate_reductase_[Bacillus_cereus] | CPTF_U          | 0           | 0           | 0           |
| UIJ65217.1 | 4-hydroxy-3-methylbut-2-enyl_diphosphate_reductase_[Bacillus_cereus] | CPTF_metals_mix | 49107.3     | 44674.16194 | 90.97254775 |
| UIJ65217.1 | 4-hydroxy-3-methylbut-2-enyl_diphosphate_reductase_[Bacillus_cereus] | CPTF_zcontrol   | 0           | 0           | 0           |
| UIJ65218.1 | Nif3-like_dinuclear_metal_center_hexameric_protein_[Bacillus_cereus] | CPTF_AI         | 14605.4     | 25297.29486 | 173.2050808 |
| UIJ65218.1 | Nif3-like_dinuclear_metal_center_hexameric_protein_[Bacillus_cereus] | CPTF_Cd         | 0           | 0           | 0           |
| UIJ65218.1 | Nif3-like_dinuclear_metal_center_hexameric_protein_[Bacillus_cereus] | CPTF_Co         | 0           | 0           | 0           |
| UIJ65218.1 | Nif3-like_dinuclear_metal_center_hexameric_protein_[Bacillus_cereus] | CPTF_Cu         | 41535       | 71940.73029 | 173.2050808 |
| UIJ65218.1 | Nif3-like_dinuclear_metal_center_hexameric_protein_[Bacillus_cereus] | CPTF_Fe         | 41787       | 72377.2071  | 173.2050808 |

|            |                                                                      |                 |             |             |             |
|------------|----------------------------------------------------------------------|-----------------|-------------|-------------|-------------|
| UIJ65218.1 | Nif3-like_dinuclear_metal_center_hexameric_protein_[Bacillus_cereus] | CPTF_Mn         | 47517.66667 | 82303.01292 | 173.2050808 |
| UIJ65218.1 | Nif3-like_dinuclear_metal_center_hexameric_protein_[Bacillus_cereus] | CPTF_Ni         | 87450.66667 | 75927.05408 | 86.82272757 |
| UIJ65218.1 | Nif3-like_dinuclear_metal_center_hexameric_protein_[Bacillus_cereus] | CPTF_U          | 43602       | 75520.87931 | 173.2050808 |
| UIJ65218.1 | Nif3-like_dinuclear_metal_center_hexameric_protein_[Bacillus_cereus] | CPTF_metals_mix | 0           | 0           | 0           |
| UIJ65218.1 | Nif3-like_dinuclear_metal_center_hexameric_protein_[Bacillus_cereus] | CPTF_zcontrol   | 0           | 0           | 0           |
| UIJ65219.1 | tRNA_(adenine(22)-N(1))-methyltransferase_TrmK_[Bacillus_cereus]     | CPTF_Al         | 0           | 0           | 0           |
| UIJ65219.1 | tRNA_(adenine(22)-N(1))-methyltransferase_TrmK_[Bacillus_cereus]     | CPTF_Cd         | 55332.1     | 49045.29318 | 88.63804768 |
| UIJ65219.1 | tRNA_(adenine(22)-N(1))-methyltransferase_TrmK_[Bacillus_cereus]     | CPTF_Co         | 0           | 0           | 0           |
| UIJ65219.1 | tRNA_(adenine(22)-N(1))-methyltransferase_TrmK_[Bacillus_cereus]     | CPTF_Cu         | 8639.2      | 14963.53334 | 173.2050808 |
| UIJ65219.1 | tRNA_(adenine(22)-N(1))-methyltransferase_TrmK_[Bacillus_cereus]     | CPTF_Fe         | 9071.53333  | 15712.35664 | 173.2050808 |
| UIJ65219.1 | tRNA_(adenine(22)-N(1))-methyltransferase_TrmK_[Bacillus_cereus]     | CPTF_Mn         | 0           | 0           | 0           |
| UIJ65219.1 | tRNA_(adenine(22)-N(1))-methyltransferase_TrmK_[Bacillus_cereus]     | CPTF_Ni         | 0           | 0           | 0           |
| UIJ65219.1 | tRNA_(adenine(22)-N(1))-methyltransferase_TrmK_[Bacillus_cereus]     | CPTF_U          | 0           | 0           | 0           |
| UIJ65219.1 | tRNA_(adenine(22)-N(1))-methyltransferase_TrmK_[Bacillus_cereus]     | CPTF_metals_mix | 77737.23333 | 32567.40697 | 41.89421925 |
| UIJ65219.1 | tRNA_(adenine(22)-N(1))-methyltransferase_TrmK_[Bacillus_cereus]     | CPTF_zcontrol   | 0           | 0           | 0           |
| UIJ65221.1 | RNA_polymerase_sigma_factor_RpoD_[Bacillus_cereus]                   | CPTF_Al         | 5809411.3   | 1089493.867 | 18.75394615 |
| UIJ65221.1 | RNA_polymerase_sigma_factor_RpoD_[Bacillus_cereus]                   | CPTF_Cd         | 5752770.1   | 913078.8809 | 15.87198628 |
| UIJ65221.1 | RNA_polymerase_sigma_factor_RpoD_[Bacillus_cereus]                   | CPTF_Co         | 5698618.833 | 231683.5755 | 4.065609268 |
| UIJ65221.1 | RNA_polymerase_sigma_factor_RpoD_[Bacillus_cereus]                   | CPTF_Cu         | 4700498.167 | 385762.6698 | 8.206846511 |
| UIJ65221.1 | RNA_polymerase_sigma_factor_RpoD_[Bacillus_cereus]                   | CPTF_Fe         | 5248125.2   | 501614.9635 | 9.557983935 |
| UIJ65221.1 | RNA_polymerase_sigma_factor_RpoD_[Bacillus_cereus]                   | CPTF_Mn         | 6092524.3   | 1129022.796 | 18.53128097 |
| UIJ65221.1 | RNA_polymerase_sigma_factor_RpoD_[Bacillus_cereus]                   | CPTF_Ni         | 4646947.167 | 327280.393  | 7.042911857 |
| UIJ65221.1 | RNA_polymerase_sigma_factor_RpoD_[Bacillus_cereus]                   | CPTF_U          | 5988340     | 579681.0563 | 9.680162721 |
| UIJ65221.1 | RNA_polymerase_sigma_factor_RpoD_[Bacillus_cereus]                   | CPTF_metals_mix | 6722283.2   | 1116028.488 | 16.60192609 |
| UIJ65221.1 | RNA_polymerase_sigma_factor_RpoD_[Bacillus_cereus]                   | CPTF_zcontrol   | 5631991.87  | 322301.221  | 5.722686191 |
| UIJ65224.1 | kinase/pyrophosphorylase_[Bacillus_cereus]                           | CPTF_Al         | 1889894.367 | 246892.6618 | 13.06383395 |
| UIJ65224.1 | kinase/pyrophosphorylase_[Bacillus_cereus]                           | CPTF_Cd         | 2169798.333 | 102168.9406 | 4.708683706 |
| UIJ65224.1 | kinase/pyrophosphorylase_[Bacillus_cereus]                           | CPTF_Co         | 1704914.333 | 61260.96905 | 3.593199251 |
| UIJ65224.1 | kinase/pyrophosphorylase_[Bacillus_cereus]                           | CPTF_Cu         | 1695216     | 125903.8887 | 7.427011585 |
| UIJ65224.1 | kinase/pyrophosphorylase_[Bacillus_cereus]                           | CPTF_Fe         | 1752124.567 | 138646.3256 | 7.913040447 |
| UIJ65224.1 | kinase/pyrophosphorylase_[Bacillus_cereus]                           | CPTF_Mn         | 1795408.1   | 173375.7911 | 9.656622977 |
| UIJ65224.1 | kinase/pyrophosphorylase_[Bacillus_cereus]                           | CPTF_Ni         | 1404194.133 | 116927.4906 | 8.327017458 |
| UIJ65224.1 | kinase/pyrophosphorylase_[Bacillus_cereus]                           | CPTF_U          | 1391925.033 | 51188.26736 | 3.677516111 |
| UIJ65224.1 | kinase/pyrophosphorylase_[Bacillus_cereus]                           | CPTF_metals_mix | 2172898.033 | 58409.56798 | 2.688095211 |
| UIJ65224.1 | kinase/pyrophosphorylase_[Bacillus_cereus]                           | CPTF_zcontrol   | 1623402.533 | 267778.0222 | 16.4948629  |
| UIJ65227.1 | GTPase_Era_[Bacillus_cereus]                                         | CPTF_Al         | 20772.13333 | 22772.09111 | 109.6280808 |
| UIJ65227.1 | GTPase_Era_[Bacillus_cereus]                                         | CPTF_Cd         | 52015.16667 | 26962.26952 | 51.83539965 |
| UIJ65227.1 | GTPase_Era_[Bacillus_cereus]                                         | CPTF_Co         | 0           | 0           | 0           |
| UIJ65227.1 | GTPase_Era_[Bacillus_cereus]                                         | CPTF_Cu         | 0           | 0           | 0           |
| UIJ65227.1 | GTPase_Era_[Bacillus_cereus]                                         | CPTF_Fe         | 0           | 0           | 0           |
| UIJ65227.1 | GTPase_Era_[Bacillus_cereus]                                         | CPTF_Mn         | 19838.5     | 34361.28995 | 173.2050808 |
| UIJ65227.1 | GTPase_Era_[Bacillus_cereus]                                         | CPTF_Ni         | 0           | 0           | 0           |
| UIJ65227.1 | GTPase_Era_[Bacillus_cereus]                                         | CPTF_U          | 14110.86667 | 24440.73801 | 173.2050808 |
| UIJ65227.1 | GTPase_Era_[Bacillus_cereus]                                         | CPTF_metals_mix | 207995.4667 | 29201.45273 | 14.03946596 |
| UIJ65227.1 | GTPase_Era_[Bacillus_cereus]                                         | CPTF_zcontrol   | 13139.63333 | 22758.51253 | 173.2050808 |
| UIJ65230.1 | rRNA_maturatation_RNase_YbeY_[Bacillus_cereus]                       | CPTF_Al         | 28444.33333 | 49267.03052 | 173.2050808 |
| UIJ65230.1 | rRNA_maturatation_RNase_YbeY_[Bacillus_cereus]                       | CPTF_Cd         | 0           | 0           | 0           |
| UIJ65230.1 | rRNA_maturatation_RNase_YbeY_[Bacillus_cereus]                       | CPTF_Co         | 0           | 0           | 0           |
| UIJ65230.1 | rRNA_maturatation_RNase_YbeY_[Bacillus_cereus]                       | CPTF_Cu         | 33968       | 58834.30183 | 173.2050808 |
| UIJ65230.1 | rRNA_maturatation_RNase_YbeY_[Bacillus_cereus]                       | CPTF_Fe         | 34404.66667 | 59590.63068 | 173.2050808 |
| UIJ65230.1 | rRNA_maturatation_RNase_YbeY_[Bacillus_cereus]                       | CPTF_Mn         | 0           | 0           | 0           |
| UIJ65230.1 | rRNA_maturatation_RNase_YbeY_[Bacillus_cereus]                       | CPTF_Ni         | 41117.33333 | 71217.31041 | 173.2050808 |
| UIJ65230.1 | rRNA_maturatation_RNase_YbeY_[Bacillus_cereus]                       | CPTF_U          | 35824.33333 | 62049.56548 | 173.2050808 |
| UIJ65230.1 | rRNA_maturatation_RNase_YbeY_[Bacillus_cereus]                       | CPTF_metals_mix | 14115.7     | 24449.10958 | 173.2050808 |
| UIJ65230.1 | rRNA_maturatation_RNase_YbeY_[Bacillus_cereus]                       | CPTF_zcontrol   | 0           | 0           | 0           |
| UIJ65232.1 | PhoH_family_protein_[Bacillus_cereus]                                | CPTF_Al         | 48947.06667 | 10368.58037 | 21.18325178 |
| UIJ65232.1 | PhoH_family_protein_[Bacillus_cereus]                                | CPTF_Cd         | 0           | 0           | 0           |
| UIJ65232.1 | PhoH_family_protein_[Bacillus_cereus]                                | CPTF_Co         | 37662.63333 | 33660.56704 | 89.37390739 |
| UIJ65232.1 | PhoH_family_protein_[Bacillus_cereus]                                | CPTF_Cu         | 78984.13333 | 21802.5387  | 27.60369428 |
| UIJ65232.1 | PhoH_family_protein_[Bacillus_cereus]                                | CPTF_Fe         | 44762.96667 | 40601.81603 | 90.70403295 |
| UIJ65232.1 | PhoH_family_protein_[Bacillus_cereus]                                | CPTF_Mn         | 0           | 0           | 0           |

|            |                                                                                                |                 |             |             |             |
|------------|------------------------------------------------------------------------------------------------|-----------------|-------------|-------------|-------------|
| UIJ65232.1 | PhoH_family_protein_[Bacillus_cereus]                                                          | CPTF_Ni         | 114868.4333 | 17423.17503 | 15.1679398  |
| UIJ65232.1 | PhoH_family_protein_[Bacillus_cereus]                                                          | CPTF_U          | 71633       | 62355.93147 | 87.04916933 |
| UIJ65232.1 | PhoH_family_protein_[Bacillus_cereus]                                                          | CPTF_metals_mix | 361690.9    | 76831.95055 | 21.24243395 |
| UIJ65232.1 | PhoH_family_protein_[Bacillus_cereus]                                                          | CPTF_zcontrol   | 10474.5     | 18142.36618 | 173.2050808 |
| UIJ65235.1 | GatB/YqeY_domain-containing_protein_[Bacillus_cereus]                                          | CPTF_Al         | 1772463.667 | 317092.884  | 17.88995115 |
| UIJ65235.1 | GatB/YqeY_domain-containing_protein_[Bacillus_cereus]                                          | CPTF_Cd         | 1963301.333 | 126282.1672 | 6.432133726 |
| UIJ65235.1 | GatB/YqeY_domain-containing_protein_[Bacillus_cereus]                                          | CPTF_Co         | 1902168.667 | 365889.4951 | 19.23538651 |
| UIJ65235.1 | GatB/YqeY_domain-containing_protein_[Bacillus_cereus]                                          | CPTF_Cu         | 1656880.333 | 260850.4605 | 15.74347014 |
| UIJ65235.1 | GatB/YqeY_domain-containing_protein_[Bacillus_cereus]                                          | CPTF_Fe         | 1906416.3   | 570886.877  | 29.94555161 |
| UIJ65235.1 | GatB/YqeY_domain-containing_protein_[Bacillus_cereus]                                          | CPTF_Mn         | 2037514     | 270050.3044 | 13.2539116  |
| UIJ65235.1 | GatB/YqeY_domain-containing_protein_[Bacillus_cereus]                                          | CPTF_Ni         | 1549168     | 536509.2216 | 34.63208778 |
| UIJ65235.1 | GatB/YqeY_domain-containing_protein_[Bacillus_cereus]                                          | CPTF_U          | 1205651     | 321654.1868 | 26.67888027 |
| UIJ65235.1 | GatB/YqeY_domain-containing_protein_[Bacillus_cereus]                                          | CPTF_metals_mix | 1901716.667 | 152574.3057 | 8.022977784 |
| UIJ65235.1 | GatB/YqeY_domain-containing_protein_[Bacillus_cereus]                                          | CPTF_zcontrol   | 1816576.667 | 268179.5357 | 14.76290765 |
| UIJ65236.1 | 30S_ribosomal_protein_S21_[Bacillus_cereus]                                                    | CPTF_Al         | 8922037     | 162792.3466 | 1.824609633 |
| UIJ65236.1 | 30S_ribosomal_protein_S21_[Bacillus_cereus]                                                    | CPTF_Cd         | 9146369     | 237851.8499 | 2.600505729 |
| UIJ65236.1 | 30S_ribosomal_protein_S21_[Bacillus_cereus]                                                    | CPTF_Co         | 8937360.667 | 567565.0256 | 6.350476911 |
| UIJ65236.1 | 30S_ribosomal_protein_S21_[Bacillus_cereus]                                                    | CPTF_Cu         | 8125509.333 | 412784.0575 | 5.080100713 |
| UIJ65236.1 | 30S_ribosomal_protein_S21_[Bacillus_cereus]                                                    | CPTF_Fe         | 9166312.333 | 238978.8205 | 2.607142456 |
| UIJ65236.1 | 30S_ribosomal_protein_S21_[Bacillus_cereus]                                                    | CPTF_Mn         | 9153692     | 277182.0392 | 3.028090077 |
| UIJ65236.1 | 30S_ribosomal_protein_S21_[Bacillus_cereus]                                                    | CPTF_Ni         | 8431969.667 | 479585.7575 | 5.687707338 |
| UIJ65236.1 | 30S_ribosomal_protein_S21_[Bacillus_cereus]                                                    | CPTF_U          | 9147564.333 | 450252.1749 | 4.922099025 |
| UIJ65236.1 | 30S_ribosomal_protein_S21_[Bacillus_cereus]                                                    | CPTF_metals_mix | 5997651     | 170344.5629 | 2.840187982 |
| UIJ65236.1 | 30S_ribosomal_protein_S21_[Bacillus_cereus]                                                    | CPTF_zcontrol   | 9622176.667 | 414945.555  | 4.312387617 |
| UIJ65237.1 | tRNA_(N(6)-L-threonylcarbamoyladenosine(37)-C(2))-methylthiotransferase_MtaB_[Bacillus_cereus] | CPTF_Al         | 9394.9      | 16272.44413 | 173.2050808 |
| UIJ65237.1 | tRNA_(N(6)-L-threonylcarbamoyladenosine(37)-C(2))-methylthiotransferase_MtaB_[Bacillus_cereus] | CPTF_Cd         | 51177.46667 | 21433.78848 | 41.88130026 |
| UIJ65237.1 | tRNA_(N(6)-L-threonylcarbamoyladenosine(37)-C(2))-methylthiotransferase_MtaB_[Bacillus_cereus] | CPTF_Co         | 25114.6     | 24741.59152 | 98.51477435 |
| UIJ65237.1 | tRNA_(N(6)-L-threonylcarbamoyladenosine(37)-C(2))-methylthiotransferase_MtaB_[Bacillus_cereus] | CPTF_Cu         | 19525.13333 | 17400.8077  | 89.12004545 |
| UIJ65237.1 | tRNA_(N(6)-L-threonylcarbamoyladenosine(37)-C(2))-methylthiotransferase_MtaB_[Bacillus_cereus] | CPTF_Fe         | 61770       | 27254.41449 | 44.12241296 |
| UIJ65237.1 | tRNA_(N(6)-L-threonylcarbamoyladenosine(37)-C(2))-methylthiotransferase_MtaB_[Bacillus_cereus] | CPTF_Mn         | 0           | 0           | 0           |
| UIJ65237.1 | tRNA_(N(6)-L-threonylcarbamoyladenosine(37)-C(2))-methylthiotransferase_MtaB_[Bacillus_cereus] | CPTF_Ni         | 13817.86667 | 23933.24712 | 173.2050808 |
| UIJ65237.1 | tRNA_(N(6)-L-threonylcarbamoyladenosine(37)-C(2))-methylthiotransferase_MtaB_[Bacillus_cereus] | CPTF_U          | 56477.46667 | 33065.21307 | 58.54585027 |
| UIJ65237.1 | tRNA_(N(6)-L-threonylcarbamoyladenosine(37)-C(2))-methylthiotransferase_MtaB_[Bacillus_cereus] | CPTF_metals_mix | 0           | 0           | 0           |
| UIJ65237.1 | tRNA_(N(6)-L-threonylcarbamoyladenosine(37)-C(2))-methylthiotransferase_MtaB_[Bacillus_cereus] | CPTF_zcontrol   | 27834.43333 | 26648.28564 | 95.73855994 |
| UIJ65239.1 | 50S_ribosomal_protein_L11_methyltransferase_[Bacillus_cereus]                                  | CPTF_Al         | 0           | 0           | 0           |
| UIJ65239.1 | 50S_ribosomal_protein_L11_methyltransferase_[Bacillus_cereus]                                  | CPTF_Cd         | 0           | 0           | 0           |
| UIJ65239.1 | 50S_ribosomal_protein_L11_methyltransferase_[Bacillus_cereus]                                  | CPTF_Co         | 0           | 0           | 0           |
| UIJ65239.1 | 50S_ribosomal_protein_L11_methyltransferase_[Bacillus_cereus]                                  | CPTF_Cu         | 0           | 0           | 0           |
| UIJ65239.1 | 50S_ribosomal_protein_L11_methyltransferase_[Bacillus_cereus]                                  | CPTF_Fe         | 0           | 0           | 0           |
| UIJ65239.1 | 50S_ribosomal_protein_L11_methyltransferase_[Bacillus_cereus]                                  | CPTF_Mn         | 49009.33333 | 84886.65538 | 173.2050808 |
| UIJ65239.1 | 50S_ribosomal_protein_L11_methyltransferase_[Bacillus_cereus]                                  | CPTF_Ni         | 0           | 0           | 0           |
| UIJ65239.1 | 50S_ribosomal_protein_L11_methyltransferase_[Bacillus_cereus]                                  | CPTF_U          | 0           | 0           | 0           |
| UIJ65239.1 | 50S_ribosomal_protein_L11_methyltransferase_[Bacillus_cereus]                                  | CPTF_metals_mix | 117016.3333 | 23296.29499 | 19.90858398 |
| UIJ65239.1 | 50S_ribosomal_protein_L11_methyltransferase_[Bacillus_cereus]                                  | CPTF_zcontrol   | 0           | 0           | 0           |
| UIJ65240.1 | chaperone_protein_DnaJ_[Bacillus_cereus]                                                       | CPTF_Al         | 2285746.333 | 26584.35597 | 1.163049267 |
| UIJ65240.1 | chaperone_protein_DnaJ_[Bacillus_cereus]                                                       | CPTF_Cd         | 2325172     | 225867.9384 | 9.714031411 |
| UIJ65240.1 | chaperone_protein_DnaJ_[Bacillus_cereus]                                                       | CPTF_Co         | 2052845.333 | 13425.55181 | 0.653997239 |
| UIJ65240.1 | chaperone_protein_DnaJ_[Bacillus_cereus]                                                       | CPTF_Cu         | 2036923.633 | 135255.9142 | 6.640205455 |
| UIJ65240.1 | chaperone_protein_DnaJ_[Bacillus_cereus]                                                       | CPTF_Fe         | 2257810.333 | 185322.6751 | 8.208070997 |
| UIJ65240.1 | chaperone_protein_DnaJ_[Bacillus_cereus]                                                       | CPTF_Mn         | 2044022.333 | 512950.8889 | 25.09517047 |
| UIJ65240.1 | chaperone_protein_DnaJ_[Bacillus_cereus]                                                       | CPTF_Ni         | 2054831     | 220394.5003 | 10.72567527 |
| UIJ65240.1 | chaperone_protein_DnaJ_[Bacillus_cereus]                                                       | CPTF_U          | 2022784.267 | 256401.1431 | 12.67565441 |
| UIJ65240.1 | chaperone_protein_DnaJ_[Bacillus_cereus]                                                       | CPTF_metals_mix | 1680214.333 | 260807.0017 | 15.5224598  |
| UIJ65240.1 | chaperone_protein_DnaJ_[Bacillus_cereus]                                                       | CPTF_zcontrol   | 2166435     | 172687.6827 | 7.971053029 |
| UIJ65241.1 | chaperone_protein_DnaK_[Bacillus_cereus]                                                       | CPTF_Al         | 46540033.63 | 4576838.995 | 9.834197867 |
| UIJ65241.1 | chaperone_protein_DnaK_[Bacillus_cereus]                                                       | CPTF_Cd         | 52763692.08 | 933556.231  | 1.769315592 |
| UIJ65241.1 | chaperone_protein_DnaK_[Bacillus_cereus]                                                       | CPTF_Co         | 45654191.73 | 2849664.356 | 6.241846035 |
| UIJ65241.1 | chaperone_protein_DnaK_[Bacillus_cereus]                                                       | CPTF_Cu         | 47569740.1  | 1177929.552 | 2.476216076 |
| UIJ65241.1 | chaperone_protein_DnaK_[Bacillus_cereus]                                                       | CPTF_Fe         | 48010709.2  | 5953502.099 | 12.40036275 |
| UIJ65241.1 | chaperone_protein_DnaK_[Bacillus_cereus]                                                       | CPTF_Mn         | 48147657    | 8321907.829 | 17.28413873 |
| UIJ65241.1 | chaperone_protein_DnaK_[Bacillus_cereus]                                                       | CPTF_Ni         | 32419016.33 | 2738386.598 | 8.446852829 |



|            |                                                        |                 |             |             |             |
|------------|--------------------------------------------------------|-----------------|-------------|-------------|-------------|
| UIJ65241.1 | chaperone_protein_DnaK_[Bacillus_cereus]               | CPTF_U          | 35075218.27 | 3197200.431 | 9.11526881  |
| UIJ65241.1 | chaperone_protein_DnaK_[Bacillus_cereus]               | CPTF_metals_mix | 59126879.33 | 2436534.815 | 4.120858131 |
| UIJ65241.1 | chaperone_protein_DnaK_[Bacillus_cereus]               | CPTF_zcontrol   | 44522689.2  | 6552401.348 | 14.71699366 |
| UIJ65242.1 | nucleotide_exchange_factor_GrpE_[Bacillus_cereus]      | CPTF_Al         | 2379626.2   | 521951.0495 | 21.93416132 |
| UIJ65242.1 | nucleotide_exchange_factor_GrpE_[Bacillus_cereus]      | CPTF_Cd         | 2973078.3   | 163654.7803 | 5.504556683 |
| UIJ65242.1 | nucleotide_exchange_factor_GrpE_[Bacillus_cereus]      | CPTF_Co         | 2398233.333 | 168568.5764 | 7.02886471  |
| UIJ65242.1 | nucleotide_exchange_factor_GrpE_[Bacillus_cereus]      | CPTF_Cu         | 2846713.467 | 282960.5482 | 9.939902682 |
| UIJ65242.1 | nucleotide_exchange_factor_GrpE_[Bacillus_cereus]      | CPTF_Fe         | 2234086.433 | 363507.2517 | 16.27095739 |
| UIJ65242.1 | nucleotide_exchange_factor_GrpE_[Bacillus_cereus]      | CPTF_Mn         | 2240917.1   | 560706.7653 | 25.02130781 |
| UIJ65242.1 | nucleotide_exchange_factor_GrpE_[Bacillus_cereus]      | CPTF_Ni         | 1704493     | 243790.1264 | 14.30279422 |
| UIJ65242.1 | nucleotide_exchange_factor_GrpE_[Bacillus_cereus]      | CPTF_U          | 1708232     | 558868.2744 | 32.71618108 |
| UIJ65242.1 | nucleotide_exchange_factor_GrpE_[Bacillus_cereus]      | CPTF_metals_mix | 3917632.767 | 198046.6868 | 5.055264202 |
| UIJ65242.1 | nucleotide_exchange_factor_GrpE_[Bacillus_cereus]      | CPTF_zcontrol   | 1876215.2   | 444897.5413 | 23.71250064 |
| UIJ65247.1 | elongation_factor_4_[Bacillus_cereus]                  | CPTF_Al         | 294675.3667 | 176767.6531 | 59.98725142 |
| UIJ65247.1 | elongation_factor_4_[Bacillus_cereus]                  | CPTF_Cd         | 336265.5333 | 166478.4093 | 49.50802054 |
| UIJ65247.1 | elongation_factor_4_[Bacillus_cereus]                  | CPTF_Co         | 439132.7    | 233931.3002 | 53.2712094  |
| UIJ65247.1 | elongation_factor_4_[Bacillus_cereus]                  | CPTF_Cu         | 306532.9333 | 164443.019  | 53.64611796 |
| UIJ65247.1 | elongation_factor_4_[Bacillus_cereus]                  | CPTF_Fe         | 228088.9333 | 123615.0815 | 54.1960014  |
| UIJ65247.1 | elongation_factor_4_[Bacillus_cereus]                  | CPTF_Mn         | 255491.4667 | 153590.0016 | 60.11551133 |
| UIJ65247.1 | elongation_factor_4_[Bacillus_cereus]                  | CPTF_Ni         | 444956.3    | 163736.611  | 36.79835772 |
| UIJ65247.1 | elongation_factor_4_[Bacillus_cereus]                  | CPTF_U          | 146371.4333 | 77796.03167 | 53.14973687 |
| UIJ65247.1 | elongation_factor_4_[Bacillus_cereus]                  | CPTF_metals_mix | 1047381.967 | 46147.17226 | 4.405954439 |
| UIJ65247.1 | elongation_factor_4_[Bacillus_cereus]                  | CPTF_zcontrol   | 180899.7333 | 110286.8981 | 60.96576044 |
| UIJ65250.1 | 30S_ribosomal_protein_S20_[Bacillus_cereus]            | CPTF_Al         | 937489.4667 | 309819.7135 | 33.04780742 |
| UIJ65250.1 | 30S_ribosomal_protein_S20_[Bacillus_cereus]            | CPTF_Cd         | 1129239.533 | 172515.7814 | 15.27716453 |
| UIJ65250.1 | 30S_ribosomal_protein_S20_[Bacillus_cereus]            | CPTF_Co         | 998336.7667 | 72284.93485 | 7.240536187 |
| UIJ65250.1 | 30S_ribosomal_protein_S20_[Bacillus_cereus]            | CPTF_Cu         | 862159.3    | 170894.9754 | 19.82174006 |
| UIJ65250.1 | 30S_ribosomal_protein_S20_[Bacillus_cereus]            | CPTF_Fe         | 913129.3    | 382540.2807 | 41.89333107 |
| UIJ65250.1 | 30S_ribosomal_protein_S20_[Bacillus_cereus]            | CPTF_Mn         | 978077.5    | 633074.3739 | 64.72640193 |
| UIJ65250.1 | 30S_ribosomal_protein_S20_[Bacillus_cereus]            | CPTF_Ni         | 735783.5333 | 103914.1435 | 14.12292322 |
| UIJ65250.1 | 30S_ribosomal_protein_S20_[Bacillus_cereus]            | CPTF_U          | 425512.8    | 153568.5118 | 36.09022144 |
| UIJ65250.1 | 30S_ribosomal_protein_S20_[Bacillus_cereus]            | CPTF_metals_mix | 1971380.2   | 113323.96   | 5.748457856 |
| UIJ65250.1 | 30S_ribosomal_protein_S20_[Bacillus_cereus]            | CPTF_zcontrol   | 488987.8    | 198451.732  | 40.58418882 |
| UIJ65263.1 | ribosome_biogenesis_GTPase_YqeH_[Bacillus_cereus]      | CPTF_Al         | 125143.3333 | 22393.82811 | 17.89454341 |
| UIJ65263.1 | ribosome_biogenesis_GTPase_YqeH_[Bacillus_cereus]      | CPTF_Cd         | 154692.3333 | 47689.57216 | 30.82865914 |
| UIJ65263.1 | ribosome_biogenesis_GTPase_YqeH_[Bacillus_cereus]      | CPTF_Co         | 163834      | 9460.906246 | 5.774690386 |
| UIJ65263.1 | ribosome_biogenesis_GTPase_YqeH_[Bacillus_cereus]      | CPTF_Cu         | 162110.0333 | 19176.40449 | 11.82925208 |
| UIJ65263.1 | ribosome_biogenesis_GTPase_YqeH_[Bacillus_cereus]      | CPTF_Fe         | 169656.6667 | 34870.54761 | 20.55359703 |
| UIJ65263.1 | ribosome_biogenesis_GTPase_YqeH_[Bacillus_cereus]      | CPTF_Mn         | 120979.3667 | 50321.85706 | 41.59540461 |
| UIJ65263.1 | ribosome_biogenesis_GTPase_YqeH_[Bacillus_cereus]      | CPTF_Ni         | 121598.3333 | 15541.35877 | 12.78089785 |
| UIJ65263.1 | ribosome_biogenesis_GTPase_YqeH_[Bacillus_cereus]      | CPTF_U          | 102088.6667 | 90053.68563 | 88.21124673 |
| UIJ65263.1 | ribosome_biogenesis_GTPase_YqeH_[Bacillus_cereus]      | CPTF_metals_mix | 186237      | 3712.09523  | 1.993210388 |
| UIJ65263.1 | ribosome_biogenesis_GTPase_YqeH_[Bacillus_cereus]      | CPTF_zcontrol   | 128192      | 12746.28491 | 9.943120405 |
| UIJ65266.1 | phosphatidylserine_decarboxylase_[Bacillus_cereus]     | CPTF_Al         | 4562.833333 | 7903.05916  | 173.2050808 |
| UIJ65266.1 | phosphatidylserine_decarboxylase_[Bacillus_cereus]     | CPTF_Cd         | 0           | 0           | 0           |
| UIJ65266.1 | phosphatidylserine_decarboxylase_[Bacillus_cereus]     | CPTF_Co         | 11785.13333 | 20412.44971 | 173.2050808 |
| UIJ65266.1 | phosphatidylserine_decarboxylase_[Bacillus_cereus]     | CPTF_Cu         | 7747.233333 | 13418.60175 | 173.2050808 |
| UIJ65266.1 | phosphatidylserine_decarboxylase_[Bacillus_cereus]     | CPTF_Fe         | 0           | 0           | 0           |
| UIJ65266.1 | phosphatidylserine_decarboxylase_[Bacillus_cereus]     | CPTF_Mn         | 0           | 0           | 0           |
| UIJ65266.1 | phosphatidylserine_decarboxylase_[Bacillus_cereus]     | CPTF_Ni         | 0           | 0           | 0           |
| UIJ65266.1 | phosphatidylserine_decarboxylase_[Bacillus_cereus]     | CPTF_U          | 0           | 0           | 0           |
| UIJ65266.1 | phosphatidylserine_decarboxylase_[Bacillus_cereus]     | CPTF_metals_mix | 0           | 0           | 0           |
| UIJ65266.1 | phosphatidylserine_decarboxylase_[Bacillus_cereus]     | CPTF_zcontrol   | 0           | 0           | 0           |
| UIJ65271.1 | GTP_pyrophosphokinase_family_protein_[Bacillus_cereus] | CPTF_Al         | 0           | 0           | 0           |
| UIJ65271.1 | GTP_pyrophosphokinase_family_protein_[Bacillus_cereus] | CPTF_Cd         | 0           | 0           | 0           |
| UIJ65271.1 | GTP_pyrophosphokinase_family_protein_[Bacillus_cereus] | CPTF_Co         | 0           | 0           | 0           |
| UIJ65271.1 | GTP_pyrophosphokinase_family_protein_[Bacillus_cereus] | CPTF_Cu         | 0           | 0           | 0           |
| UIJ65271.1 | GTP_pyrophosphokinase_family_protein_[Bacillus_cereus] | CPTF_Fe         | 0           | 0           | 0           |
| UIJ65271.1 | GTP_pyrophosphokinase_family_protein_[Bacillus_cereus] | CPTF_Mn         | 0           | 0           | 0           |
| UIJ65271.1 | GTP_pyrophosphokinase_family_protein_[Bacillus_cereus] | CPTF_Ni         | 0           | 0           | 0           |
| UIJ65271.1 | GTP_pyrophosphokinase_family_protein_[Bacillus_cereus] | CPTF_U          | 0           | 0           | 0           |

|            |                                                                                     |                 |             |             |             |
|------------|-------------------------------------------------------------------------------------|-----------------|-------------|-------------|-------------|
| UIJ65271.1 | GTP_pyrophosphokinase_family_protein_[Bacillus_cereus]                              | CPTF_metals_mix | 11058.5     | 19153.88386 | 173.2050808 |
| UIJ65271.1 | GTP_pyrophosphokinase_family_protein_[Bacillus_cereus]                              | CPTF_zcontrol   | 0           | 0           | 0           |
| UIJ65281.1 | aromatic_amino_acid_hydroxylase_[Bacillus_cereus]                                   | CPTF_Al         | 0           | 0           | 0           |
| UIJ65281.1 | aromatic_amino_acid_hydroxylase_[Bacillus_cereus]                                   | CPTF_Cd         | 0           | 0           | 0           |
| UIJ65281.1 | aromatic_amino_acid_hydroxylase_[Bacillus_cereus]                                   | CPTF_Co         | 0           | 0           | 0           |
| UIJ65281.1 | aromatic_amino_acid_hydroxylase_[Bacillus_cereus]                                   | CPTF_Cu         | 12725.33333 | 22040.92388 | 173.2050808 |
| UIJ65281.1 | aromatic_amino_acid_hydroxylase_[Bacillus_cereus]                                   | CPTF_Fe         | 0           | 0           | 0           |
| UIJ65281.1 | aromatic_amino_acid_hydroxylase_[Bacillus_cereus]                                   | CPTF_Mn         | 0           | 0           | 0           |
| UIJ65281.1 | aromatic_amino_acid_hydroxylase_[Bacillus_cereus]                                   | CPTF_Ni         | 0           | 0           | 0           |
| UIJ65281.1 | aromatic_amino_acid_hydroxylase_[Bacillus_cereus]                                   | CPTF_U          | 0           | 0           | 0           |
| UIJ65281.1 | aromatic_amino_acid_hydroxylase_[Bacillus_cereus]                                   | CPTF_metals_mix | 30776.33333 | 33183.32668 | 107.820923  |
| UIJ65281.1 | aromatic_amino_acid_hydroxylase_[Bacillus_cereus]                                   | CPTF_zcontrol   | 0           | 0           | 0           |
| UIJ65286.1 | enoyl-CoA_hydratase_[Bacillus_cereus]                                               | CPTF_Al         | 346025.3333 | 44244.95456 | 12.78662291 |
| UIJ65286.1 | enoyl-CoA_hydratase_[Bacillus_cereus]                                               | CPTF_Cd         | 387899.6667 | 31247.71746 | 8.055618538 |
| UIJ65286.1 | enoyl-CoA_hydratase_[Bacillus_cereus]                                               | CPTF_Co         | 301067.6667 | 40767.75331 | 13.54105998 |
| UIJ65286.1 | enoyl-CoA_hydratase_[Bacillus_cereus]                                               | CPTF_Cu         | 273361.6667 | 29774.31504 | 10.89191305 |
| UIJ65286.1 | enoyl-CoA_hydratase_[Bacillus_cereus]                                               | CPTF_Fe         | 437898.3333 | 39495.86095 | 9.019413399 |
| UIJ65286.1 | enoyl-CoA_hydratase_[Bacillus_cereus]                                               | CPTF_Mn         | 386770.6333 | 43488.81818 | 11.24408485 |
| UIJ65286.1 | enoyl-CoA_hydratase_[Bacillus_cereus]                                               | CPTF_Ni         | 384704      | 23857.65204 | 6.201560692 |
| UIJ65286.1 | enoyl-CoA_hydratase_[Bacillus_cereus]                                               | CPTF_U          | 373719.3333 | 18040.59313 | 4.827310636 |
| UIJ65286.1 | enoyl-CoA_hydratase_[Bacillus_cereus]                                               | CPTF_metals_mix | 206961.3667 | 18145.61619 | 8.767634501 |
| UIJ65286.1 | enoyl-CoA_hydratase_[Bacillus_cereus]                                               | CPTF_zcontrol   | 329045.6667 | 27187.63234 | 8.262571155 |
| UIJ65292.1 | ABC_transporter_substrate-binding_protein_[Bacillus_cereus]                         | CPTF_Al         | 0           | 0           | 0           |
| UIJ65292.1 | ABC_transporter_substrate-binding_protein_[Bacillus_cereus]                         | CPTF_Cd         | 0           | 0           | 0           |
| UIJ65292.1 | ABC_transporter_substrate-binding_protein_[Bacillus_cereus]                         | CPTF_Co         | 0           | 0           | 0           |
| UIJ65292.1 | ABC_transporter_substrate-binding_protein_[Bacillus_cereus]                         | CPTF_Cu         | 0           | 0           | 0           |
| UIJ65292.1 | ABC_transporter_substrate-binding_protein_[Bacillus_cereus]                         | CPTF_Fe         | 0           | 0           | 0           |
| UIJ65292.1 | ABC_transporter_substrate-binding_protein_[Bacillus_cereus]                         | CPTF_Mn         | 0           | 0           | 0           |
| UIJ65292.1 | ABC_transporter_substrate-binding_protein_[Bacillus_cereus]                         | CPTF_Ni         | 0           | 0           | 0           |
| UIJ65292.1 | ABC_transporter_substrate-binding_protein_[Bacillus_cereus]                         | CPTF_U          | 0           | 0           | 0           |
| UIJ65292.1 | ABC_transporter_substrate-binding_protein_[Bacillus_cereus]                         | CPTF_metals_mix | 293182      | 21365.87309 | 7.287580101 |
| UIJ65292.1 | ABC_transporter_substrate-binding_protein_[Bacillus_cereus]                         | CPTF_zcontrol   | 0           | 0           | 0           |
| UIJ65294.1 | bifunctional_acetaldehyde-CoA/alcohol_dehydrogenase_[Bacillus_cereus]               | CPTF_Al         | 426765      | 265852.036  | 62.29471395 |
| UIJ65294.1 | bifunctional_acetaldehyde-CoA/alcohol_dehydrogenase_[Bacillus_cereus]               | CPTF_Cd         | 513871.7333 | 195443.8959 | 38.0335954  |
| UIJ65294.1 | bifunctional_acetaldehyde-CoA/alcohol_dehydrogenase_[Bacillus_cereus]               | CPTF_Co         | 1568106.133 | 774033.0061 | 49.36100878 |
| UIJ65294.1 | bifunctional_acetaldehyde-CoA/alcohol_dehydrogenase_[Bacillus_cereus]               | CPTF_Cu         | 698586.1667 | 174994.8245 | 25.04985539 |
| UIJ65294.1 | bifunctional_acetaldehyde-CoA/alcohol_dehydrogenase_[Bacillus_cereus]               | CPTF_Fe         | 737162.2    | 165317.9067 | 22.42625933 |
| UIJ65294.1 | bifunctional_acetaldehyde-CoA/alcohol_dehydrogenase_[Bacillus_cereus]               | CPTF_Mn         | 557400.7    | 93130.48564 | 16.70799582 |
| UIJ65294.1 | bifunctional_acetaldehyde-CoA/alcohol_dehydrogenase_[Bacillus_cereus]               | CPTF_Ni         | 769991.0667 | 332646.5327 | 43.20134961 |
| UIJ65294.1 | bifunctional_acetaldehyde-CoA/alcohol_dehydrogenase_[Bacillus_cereus]               | CPTF_U          | 128768      | 223032.7184 | 173.2050808 |
| UIJ65294.1 | bifunctional_acetaldehyde-CoA/alcohol_dehydrogenase_[Bacillus_cereus]               | CPTF_metals_mix | 2220225.7   | 561938.0614 | 25.30995211 |
| UIJ65294.1 | bifunctional_acetaldehyde-CoA/alcohol_dehydrogenase_[Bacillus_cereus]               | CPTF_zcontrol   | 50276.7     | 45477.61413 | 90.45465222 |
| UIJ65295.1 | bifunctional_cystathionine_gamma-lyase/homocysteine_desulfhydrase_[Bacillus_cereus] | CPTF_Al         | 11131145.13 | 618105.4154 | 5.552936449 |
| UIJ65295.1 | bifunctional_cystathionine_gamma-lyase/homocysteine_desulfhydrase_[Bacillus_cereus] | CPTF_Cd         | 12896233.67 | 233580.4342 | 1.811229854 |
| UIJ65295.1 | bifunctional_cystathionine_gamma-lyase/homocysteine_desulfhydrase_[Bacillus_cereus] | CPTF_Co         | 12407176.9  | 313786.8503 | 2.529075331 |
| UIJ65295.1 | bifunctional_cystathionine_gamma-lyase/homocysteine_desulfhydrase_[Bacillus_cereus] | CPTF_Cu         | 14388282    | 396582.383  | 2.756287255 |
| UIJ65295.1 | bifunctional_cystathionine_gamma-lyase/homocysteine_desulfhydrase_[Bacillus_cereus] | CPTF_Fe         | 11470448.33 | 205772.3125 | 1.793943448 |
| UIJ65295.1 | bifunctional_cystathionine_gamma-lyase/homocysteine_desulfhydrase_[Bacillus_cereus] | CPTF_Mn         | 11463119.1  | 705329.9038 | 6.153036514 |
| UIJ65295.1 | bifunctional_cystathionine_gamma-lyase/homocysteine_desulfhydrase_[Bacillus_cereus] | CPTF_Ni         | 11401895.77 | 209846.9011 | 1.840456231 |
| UIJ65295.1 | bifunctional_cystathionine_gamma-lyase/homocysteine_desulfhydrase_[Bacillus_cereus] | CPTF_U          | 10861802.6  | 313828.0138 | 2.889281138 |
| UIJ65295.1 | bifunctional_cystathionine_gamma-lyase/homocysteine_desulfhydrase_[Bacillus_cereus] | CPTF_metals_mix | 20826819.33 | 1001274.17  | 4.807619224 |
| UIJ65295.1 | bifunctional_cystathionine_gamma-lyase/homocysteine_desulfhydrase_[Bacillus_cereus] | CPTF_zcontrol   | 11118628.93 | 984791.788  | 8.85713332  |
| UIJ65296.1 | O-acetylserine_dependent_cystathionine_beta-synthase_[Bacillus_cereus]              | CPTF_Al         | 1183520.133 | 305245.2107 | 25.79129853 |
| UIJ65296.1 | O-acetylserine_dependent_cystathionine_beta-synthase_[Bacillus_cereus]              | CPTF_Cd         | 1540118.033 | 168478.3843 | 10.93931638 |
| UIJ65296.1 | O-acetylserine_dependent_cystathionine_beta-synthase_[Bacillus_cereus]              | CPTF_Co         | 1588462.833 | 459691.0828 | 28.93936661 |
| UIJ65296.1 | O-acetylserine_dependent_cystathionine_beta-synthase_[Bacillus_cereus]              | CPTF_Cu         | 2088464.867 | 257084.6041 | 12.30974043 |
| UIJ65296.1 | O-acetylserine_dependent_cystathionine_beta-synthase_[Bacillus_cereus]              | CPTF_Fe         | 1162685.933 | 330820.4256 | 28.45312015 |
| UIJ65296.1 | O-acetylserine_dependent_cystathionine_beta-synthase_[Bacillus_cereus]              | CPTF_Mn         | 1109436.5   | 343651.5892 | 30.97532749 |
| UIJ65296.1 | O-acetylserine_dependent_cystathionine_beta-synthase_[Bacillus_cereus]              | CPTF_Ni         | 938855.3333 | 423439.1405 | 45.10163872 |
| UIJ65296.1 | O-acetylserine_dependent_cystathionine_beta-synthase_[Bacillus_cereus]              | CPTF_U          | 1199423.333 | 344933.1932 | 28.7582527  |
| UIJ65296.1 | O-acetylserine_dependent_cystathionine_beta-synthase_[Bacillus_cereus]              | CPTF_metals_mix | 4735573.133 | 107199.0653 | 2.263697809 |

|            |                                                                                       |                 |             |             |             |
|------------|---------------------------------------------------------------------------------------|-----------------|-------------|-------------|-------------|
| UIJ65296.1 | O-acetylserine_dependent_cystathionine_beta-synthase_[ <i>Bacillus_cereus</i> ]       | CPTF_zcontrol   | 1144537.567 | 213330.1164 | 18.63897897 |
| UIJ65297.1 | 5'-methylthioadenosine/S-adenosylhomocysteine_nucleosidase_[ <i>Bacillus_cereus</i> ] | CPTF_Al         | 1771810.7   | 240032.0766 | 13.54727548 |
| UIJ65297.1 | 5'-methylthioadenosine/S-adenosylhomocysteine_nucleosidase_[ <i>Bacillus_cereus</i> ] | CPTF_Cd         | 1861553.867 | 20296.92672 | 1.090321751 |
| UIJ65297.1 | 5'-methylthioadenosine/S-adenosylhomocysteine_nucleosidase_[ <i>Bacillus_cereus</i> ] | CPTF_Co         | 2043524.333 | 76621.65862 | 3.749485992 |
| UIJ65297.1 | 5'-methylthioadenosine/S-adenosylhomocysteine_nucleosidase_[ <i>Bacillus_cereus</i> ] | CPTF_Cu         | 2422183.467 | 37921.43194 | 1.565588753 |
| UIJ65297.1 | 5'-methylthioadenosine/S-adenosylhomocysteine_nucleosidase_[ <i>Bacillus_cereus</i> ] | CPTF_Fe         | 1679756.333 | 189910.9172 | 11.30586106 |
| UIJ65297.1 | 5'-methylthioadenosine/S-adenosylhomocysteine_nucleosidase_[ <i>Bacillus_cereus</i> ] | CPTF_Mn         | 1579830.4   | 258553.5135 | 16.36590317 |
| UIJ65297.1 | 5'-methylthioadenosine/S-adenosylhomocysteine_nucleosidase_[ <i>Bacillus_cereus</i> ] | CPTF_Ni         | 1726677.667 | 195282.845  | 11.30974523 |
| UIJ65297.1 | 5'-methylthioadenosine/S-adenosylhomocysteine_nucleosidase_[ <i>Bacillus_cereus</i> ] | CPTF_U          | 1359430.333 | 30705.27734 | 2.258687083 |
| UIJ65297.1 | 5'-methylthioadenosine/S-adenosylhomocysteine_nucleosidase_[ <i>Bacillus_cereus</i> ] | CPTF_metals_mix | 4875573.667 | 1095341.34  | 22.46589662 |
| UIJ65297.1 | 5'-methylthioadenosine/S-adenosylhomocysteine_nucleosidase_[ <i>Bacillus_cereus</i> ] | CPTF_zcontrol   | 1541846.067 | 85696.13235 | 5.558021271 |
| UIJ65298.1 | class_I_SAM-dependent_methyltransferase_[ <i>Bacillus_cereus</i> ]                    | CPTF_Al         | 2938626.633 | 316596.1182 | 10.77360814 |
| UIJ65298.1 | class_I_SAM-dependent_methyltransferase_[ <i>Bacillus_cereus</i> ]                    | CPTF_Cd         | 2331125.9   | 1168625.289 | 50.13136736 |
| UIJ65298.1 | class_I_SAM-dependent_methyltransferase_[ <i>Bacillus_cereus</i> ]                    | CPTF_Co         | 2339025.8   | 1177883.585 | 50.35787055 |
| UIJ65298.1 | class_I_SAM-dependent_methyltransferase_[ <i>Bacillus_cereus</i> ]                    | CPTF_Cu         | 3437923.267 | 1223180.267 | 35.57904502 |
| UIJ65298.1 | class_I_SAM-dependent_methyltransferase_[ <i>Bacillus_cereus</i> ]                    | CPTF_Fe         | 2567504.767 | 1005711.067 | 39.17075755 |
| UIJ65298.1 | class_I_SAM-dependent_methyltransferase_[ <i>Bacillus_cereus</i> ]                    | CPTF_Mn         | 2425887.2   | 1090707.734 | 44.96118919 |
| UIJ65298.1 | class_I_SAM-dependent_methyltransferase_[ <i>Bacillus_cereus</i> ]                    | CPTF_Ni         | 2767655.467 | 1246273.202 | 45.02992577 |
| UIJ65298.1 | class_I_SAM-dependent_methyltransferase_[ <i>Bacillus_cereus</i> ]                    | CPTF_U          | 2669148.6   | 217266.4435 | 8.13991561  |
| UIJ65298.1 | class_I_SAM-dependent_methyltransferase_[ <i>Bacillus_cereus</i> ]                    | CPTF_metals_mix | 7291032.367 | 330593.1537 | 4.534243398 |
| UIJ65298.1 | class_I_SAM-dependent_methyltransferase_[ <i>Bacillus_cereus</i> ]                    | CPTF_zcontrol   | 2694032.233 | 1060678.625 | 39.37141552 |
| UIJ65300.1 | YrrS_family_protein_[ <i>Bacillus_cereus</i> ]                                        | CPTF_Al         | 16280       | 28197.78715 | 173.2050808 |
| UIJ65300.1 | YrrS_family_protein_[ <i>Bacillus_cereus</i> ]                                        | CPTF_Cd         | 39594.06667 | 38237.61109 | 96.57409381 |
| UIJ65300.1 | YrrS_family_protein_[ <i>Bacillus_cereus</i> ]                                        | CPTF_Co         | 0           | 0           | 0           |
| UIJ65300.1 | YrrS_family_protein_[ <i>Bacillus_cereus</i> ]                                        | CPTF_Cu         | 5826.833333 | 10092.37138 | 173.2050808 |
| UIJ65300.1 | YrrS_family_protein_[ <i>Bacillus_cereus</i> ]                                        | CPTF_Fe         | 0           | 0           | 0           |
| UIJ65300.1 | YrrS_family_protein_[ <i>Bacillus_cereus</i> ]                                        | CPTF_Mn         | 10444.9     | 18091.09748 | 173.2050808 |
| UIJ65300.1 | YrrS_family_protein_[ <i>Bacillus_cereus</i> ]                                        | CPTF_Ni         | 0           | 0           | 0           |
| UIJ65300.1 | YrrS_family_protein_[ <i>Bacillus_cereus</i> ]                                        | CPTF_U          | 14402.23333 | 24945.39988 | 173.2050808 |
| UIJ65300.1 | YrrS_family_protein_[ <i>Bacillus_cereus</i> ]                                        | CPTF_metals_mix | 44057.5     | 28366.82968 | 64.38592675 |
| UIJ65300.1 | YrrS_family_protein_[ <i>Bacillus_cereus</i> ]                                        | CPTF_zcontrol   | 0           | 0           | 0           |
| UIJ65303.1 | transcription_elongation_factor_GreA_[ <i>Bacillus_cereus</i> ]                       | CPTF_Al         | 6227721.667 | 72158.66878 | 1.158668814 |
| UIJ65303.1 | transcription_elongation_factor_GreA_[ <i>Bacillus_cereus</i> ]                       | CPTF_Cd         | 6928071.667 | 301538.1749 | 4.352411312 |
| UIJ65303.1 | transcription_elongation_factor_GreA_[ <i>Bacillus_cereus</i> ]                       | CPTF_Co         | 6315609.667 | 165240.5495 | 2.616383187 |
| UIJ65303.1 | transcription_elongation_factor_GreA_[ <i>Bacillus_cereus</i> ]                       | CPTF_Cu         | 5880147.333 | 515187.318  | 8.761469547 |
| UIJ65303.1 | transcription_elongation_factor_GreA_[ <i>Bacillus_cereus</i> ]                       | CPTF_Fe         | 6153553.333 | 225766.8292 | 3.668885552 |
| UIJ65303.1 | transcription_elongation_factor_GreA_[ <i>Bacillus_cereus</i> ]                       | CPTF_Mn         | 6708636     | 204175.753  | 3.043476394 |
| UIJ65303.1 | transcription_elongation_factor_GreA_[ <i>Bacillus_cereus</i> ]                       | CPTF_Ni         | 5676956.667 | 223233.1234 | 3.932267526 |
| UIJ65303.1 | transcription_elongation_factor_GreA_[ <i>Bacillus_cereus</i> ]                       | CPTF_U          | 5575316.667 | 145052.0836 | 2.601683317 |
| UIJ65303.1 | transcription_elongation_factor_GreA_[ <i>Bacillus_cereus</i> ]                       | CPTF_metals_mix | 5390419     | 257790.803  | 4.782388956 |
| UIJ65303.1 | transcription_elongation_factor_GreA_[ <i>Bacillus_cereus</i> ]                       | CPTF_zcontrol   | 6236112.667 | 187396.9261 | 3.005027909 |
| UIJ65304.1 | uridine_kinase_[ <i>Bacillus_cereus</i> ]                                             | CPTF_Al         | 0           | 0           | 0           |
| UIJ65304.1 | uridine_kinase_[ <i>Bacillus_cereus</i> ]                                             | CPTF_Cd         | 59213.66667 | 102561.0792 | 173.2050808 |
| UIJ65304.1 | uridine_kinase_[ <i>Bacillus_cereus</i> ]                                             | CPTF_Co         | 147892      | 22760.79401 | 15.39014552 |
| UIJ65304.1 | uridine_kinase_[ <i>Bacillus_cereus</i> ]                                             | CPTF_Cu         | 193433.7333 | 111969.2896 | 57.88508949 |
| UIJ65304.1 | uridine_kinase_[ <i>Bacillus_cereus</i> ]                                             | CPTF_Fe         | 187925.9667 | 289285.4839 | 153.9358765 |
| UIJ65304.1 | uridine_kinase_[ <i>Bacillus_cereus</i> ]                                             | CPTF_Mn         | 0           | 0           | 0           |
| UIJ65304.1 | uridine_kinase_[ <i>Bacillus_cereus</i> ]                                             | CPTF_Ni         | 10199.63333 | 17666.28315 | 173.2050808 |
| UIJ65304.1 | uridine_kinase_[ <i>Bacillus_cereus</i> ]                                             | CPTF_U          | 171999.4667 | 237889.3872 | 138.3082121 |
| UIJ65304.1 | uridine_kinase_[ <i>Bacillus_cereus</i> ]                                             | CPTF_metals_mix | 103919.8667 | 110557.0656 | 106.3868432 |
| UIJ65304.1 | uridine_kinase_[ <i>Bacillus_cereus</i> ]                                             | CPTF_zcontrol   | 102955.4    | 111705.2398 | 108.4986701 |
| UIJ65306.1 | U32_family_peptidase_[ <i>Bacillus_cereus</i> ]                                       | CPTF_Al         | 116522      | 79056.19731 | 67.8465846  |
| UIJ65306.1 | U32_family_peptidase_[ <i>Bacillus_cereus</i> ]                                       | CPTF_Cd         | 20092.96667 | 17464.33323 | 86.91764397 |
| UIJ65306.1 | U32_family_peptidase_[ <i>Bacillus_cereus</i> ]                                       | CPTF_Co         | 97600.7     | 103906.9089 | 106.4612333 |
| UIJ65306.1 | U32_family_peptidase_[ <i>Bacillus_cereus</i> ]                                       | CPTF_Cu         | 215374.2333 | 108264.9    | 50.26826948 |
| UIJ65306.1 | U32_family_peptidase_[ <i>Bacillus_cereus</i> ]                                       | CPTF_Fe         | 117651.9667 | 166202.645  | 141.2663551 |
| UIJ65306.1 | U32_family_peptidase_[ <i>Bacillus_cereus</i> ]                                       | CPTF_Mn         | 44733.23333 | 38778.14071 | 86.68754263 |
| UIJ65306.1 | U32_family_peptidase_[ <i>Bacillus_cereus</i> ]                                       | CPTF_Ni         | 174375.4    | 198287.0702 | 113.7127543 |
| UIJ65306.1 | U32_family_peptidase_[ <i>Bacillus_cereus</i> ]                                       | CPTF_U          | 202229.3    | 179018.8373 | 88.52270036 |
| UIJ65306.1 | U32_family_peptidase_[ <i>Bacillus_cereus</i> ]                                       | CPTF_metals_mix | 0           | 0           | 0           |
| UIJ65306.1 | U32_family_peptidase_[ <i>Bacillus_cereus</i> ]                                       | CPTF_zcontrol   | 138329.7    | 76042.65401 | 54.97203711 |

|            |                                                         |                 |             |             |             |
|------------|---------------------------------------------------------|-----------------|-------------|-------------|-------------|
| UIJ65309.1 | DUF1292_domain-containing_protein_[Bacillus_cereus]     | CPTF_Al         | 1081606.533 | 127574.6512 | 11.79492239 |
| UIJ65309.1 | DUF1292_domain-containing_protein_[Bacillus_cereus]     | CPTF_Cd         | 1173535.7   | 47170.59943 | 4.019528288 |
| UIJ65309.1 | DUF1292_domain-containing_protein_[Bacillus_cereus]     | CPTF_Co         | 1042881.633 | 48837.22689 | 4.682911783 |
| UIJ65309.1 | DUF1292_domain-containing_protein_[Bacillus_cereus]     | CPTF_Cu         | 906868      | 17831.14306 | 1.966233571 |
| UIJ65309.1 | DUF1292_domain-containing_protein_[Bacillus_cereus]     | CPTF_Fe         | 1017825.867 | 111236.3586 | 10.92882016 |
| UIJ65309.1 | DUF1292_domain-containing_protein_[Bacillus_cereus]     | CPTF_Mn         | 1149637.333 | 60455.14801 | 5.258627766 |
| UIJ65309.1 | DUF1292_domain-containing_protein_[Bacillus_cereus]     | CPTF_Ni         | 896784.3    | 78059.7106  | 8.704402006 |
| UIJ65309.1 | DUF1292_domain-containing_protein_[Bacillus_cereus]     | CPTF_U          | 896891.3333 | 107615.872  | 11.99876373 |
| UIJ65309.1 | DUF1292_domain-containing_protein_[Bacillus_cereus]     | CPTF_metals_mix | 922375.6667 | 62950.7691  | 6.824851454 |
| UIJ65309.1 | DUF1292_domain-containing_protein_[Bacillus_cereus]     | CPTF_zcontrol   | 1145747.033 | 129235.3445 | 11.27957051 |
| UIJ65310.1 | Holliday_junction_resolvase_RuvX_[Bacillus_cereus]      | CPTF_Al         | 179049      | 51708.30781 | 28.87941726 |
| UIJ65310.1 | Holliday_junction_resolvase_RuvX_[Bacillus_cereus]      | CPTF_Cd         | 161317.6667 | 35682.22911 | 22.1192321  |
| UIJ65310.1 | Holliday_junction_resolvase_RuvX_[Bacillus_cereus]      | CPTF_Co         | 160900.3667 | 91398.94835 | 56.80468618 |
| UIJ65310.1 | Holliday_junction_resolvase_RuvX_[Bacillus_cereus]      | CPTF_Cu         | 137097.6667 | 56586.92883 | 41.27490293 |
| UIJ65310.1 | Holliday_junction_resolvase_RuvX_[Bacillus_cereus]      | CPTF_Fe         | 247864.3333 | 20835.28273 | 8.405922081 |
| UIJ65310.1 | Holliday_junction_resolvase_RuvX_[Bacillus_cereus]      | CPTF_Mn         | 144484.6667 | 128418.9959 | 88.88070881 |
| UIJ65310.1 | Holliday_junction_resolvase_RuvX_[Bacillus_cereus]      | CPTF_Ni         | 73533.26667 | 79691.49052 | 108.3747454 |
| UIJ65310.1 | Holliday_junction_resolvase_RuvX_[Bacillus_cereus]      | CPTF_U          | 108315      | 130174.2686 | 120.1812017 |
| UIJ65310.1 | Holliday_junction_resolvase_RuvX_[Bacillus_cereus]      | CPTF_metals_mix | 178482.6667 | 55805.61737 | 31.26668736 |
| UIJ65310.1 | Holliday_junction_resolvase_RuvX_[Bacillus_cereus]      | CPTF_zcontrol   | 149646.3333 | 129685.6661 | 86.66143914 |
| UIJ65311.1 | IreB_family_regulatory_phosphoprotein_[Bacillus_cereus] | CPTF_Al         | 749121.3333 | 61525.10127 | 8.212968785 |
| UIJ65311.1 | IreB_family_regulatory_phosphoprotein_[Bacillus_cereus] | CPTF_Cd         | 801524.3333 | 29169.06101 | 3.639198437 |
| UIJ65311.1 | IreB_family_regulatory_phosphoprotein_[Bacillus_cereus] | CPTF_Co         | 697888.6667 | 64788.88675 | 9.283556224 |
| UIJ65311.1 | IreB_family_regulatory_phosphoprotein_[Bacillus_cereus] | CPTF_Cu         | 772716.6667 | 22079.55834 | 2.857393827 |
| UIJ65311.1 | IreB_family_regulatory_phosphoprotein_[Bacillus_cereus] | CPTF_Fe         | 734435.6667 | 55052.21896 | 7.495853137 |
| UIJ65311.1 | IreB_family_regulatory_phosphoprotein_[Bacillus_cereus] | CPTF_Mn         | 739467      | 62799.77567 | 8.492573119 |
| UIJ65311.1 | IreB_family_regulatory_phosphoprotein_[Bacillus_cereus] | CPTF_Ni         | 745417.3333 | 20528.94974 | 2.754020979 |
| UIJ65311.1 | IreB_family_regulatory_phosphoprotein_[Bacillus_cereus] | CPTF_U          | 626881.6667 | 96316.25688 | 15.36434418 |
| UIJ65311.1 | IreB_family_regulatory_phosphoprotein_[Bacillus_cereus] | CPTF_metals_mix | 846654      | 83631.41676 | 9.877874168 |
| UIJ65311.1 | IreB_family_regulatory_phosphoprotein_[Bacillus_cereus] | CPTF_zcontrol   | 756536.3333 | 109058.9705 | 14.41556284 |
| UIJ65312.1 | alanine--tRNA_ligase_[Bacillus_cereus]                  | CPTF_Al         | 5290794.8   | 160097.9532 | 3.025971698 |
| UIJ65312.1 | alanine--tRNA_ligase_[Bacillus_cereus]                  | CPTF_Cd         | 5442521.133 | 828854.9445 | 15.22924623 |
| UIJ65312.1 | alanine--tRNA_ligase_[Bacillus_cereus]                  | CPTF_Co         | 5380544.567 | 551393.0084 | 10.24790338 |
| UIJ65312.1 | alanine--tRNA_ligase_[Bacillus_cereus]                  | CPTF_Cu         | 5388584.233 | 82828.16309 | 1.537104358 |
| UIJ65312.1 | alanine--tRNA_ligase_[Bacillus_cereus]                  | CPTF_Fe         | 4654344.333 | 769808.351  | 16.53956596 |
| UIJ65312.1 | alanine--tRNA_ligase_[Bacillus_cereus]                  | CPTF_Mn         | 5318801.067 | 1218901.456 | 22.91684612 |
| UIJ65312.1 | alanine--tRNA_ligase_[Bacillus_cereus]                  | CPTF_Ni         | 4182384.433 | 800812.5901 | 19.14727359 |
| UIJ65312.1 | alanine--tRNA_ligase_[Bacillus_cereus]                  | CPTF_U          | 3257159.9   | 1131290.857 | 34.73243229 |
| UIJ65312.1 | alanine--tRNA_ligase_[Bacillus_cereus]                  | CPTF_metals_mix | 7705813.867 | 469546.265  | 6.093402633 |
| UIJ65312.1 | alanine--tRNA_ligase_[Bacillus_cereus]                  | CPTF_zcontrol   | 4959323.3   | 220001.7845 | 4.436125075 |
| UIJ65313.1 | PH_domain-containing_protein_[Bacillus_cereus]          | CPTF_Al         | 0           | 0           | 0           |
| UIJ65313.1 | PH_domain-containing_protein_[Bacillus_cereus]          | CPTF_Cd         | 0           | 0           | 0           |
| UIJ65313.1 | PH_domain-containing_protein_[Bacillus_cereus]          | CPTF_Co         | 0           | 0           | 0           |
| UIJ65313.1 | PH_domain-containing_protein_[Bacillus_cereus]          | CPTF_Cu         | 5776.833333 | 10005.76884 | 173.2050808 |
| UIJ65313.1 | PH_domain-containing_protein_[Bacillus_cereus]          | CPTF_Fe         | 0           | 0           | 0           |
| UIJ65313.1 | PH_domain-containing_protein_[Bacillus_cereus]          | CPTF_Mn         | 0           | 0           | 0           |
| UIJ65313.1 | PH_domain-containing_protein_[Bacillus_cereus]          | CPTF_Ni         | 0           | 0           | 0           |
| UIJ65313.1 | PH_domain-containing_protein_[Bacillus_cereus]          | CPTF_U          | 0           | 0           | 0           |
| UIJ65313.1 | PH_domain-containing_protein_[Bacillus_cereus]          | CPTF_metals_mix | 4988.4      | 8640.162248 | 173.2050808 |
| UIJ65313.1 | PH_domain-containing_protein_[Bacillus_cereus]          | CPTF_zcontrol   | 0           | 0           | 0           |
| UIJ65320.1 | cysteine_desulfurase_[Bacillus_cereus]                  | CPTF_Al         | 200935.3333 | 30400.40862 | 15.12944892 |
| UIJ65320.1 | cysteine_desulfurase_[Bacillus_cereus]                  | CPTF_Cd         | 187003.3333 | 33953.03495 | 18.15637954 |
| UIJ65320.1 | cysteine_desulfurase_[Bacillus_cereus]                  | CPTF_Co         | 120646.3333 | 121119.7435 | 100.392395  |
| UIJ65320.1 | cysteine_desulfurase_[Bacillus_cereus]                  | CPTF_Cu         | 157748      | 53059.35903 | 33.63551933 |
| UIJ65320.1 | cysteine_desulfurase_[Bacillus_cereus]                  | CPTF_Fe         | 196031      | 45145.39774 | 23.02972374 |
| UIJ65320.1 | cysteine_desulfurase_[Bacillus_cereus]                  | CPTF_Mn         | 129091.3333 | 14939.77785 | 11.57302932 |
| UIJ65320.1 | cysteine_desulfurase_[Bacillus_cereus]                  | CPTF_Ni         | 128509      | 23133.92589 | 18.00179434 |
| UIJ65320.1 | cysteine_desulfurase_[Bacillus_cereus]                  | CPTF_U          | 65579.43333 | 57289.39505 | 87.35878329 |
| UIJ65320.1 | cysteine_desulfurase_[Bacillus_cereus]                  | CPTF_metals_mix | 395809      | 125139.5724 | 31.61615132 |
| UIJ65320.1 | cysteine_desulfurase_[Bacillus_cereus]                  | CPTF_zcontrol   | 193920      | 54160.64035 | 27.92937312 |
| UIJ65321.1 | Rrf2_family_transcriptional_regulator_[Bacillus_cereus] | CPTF_Al         | 1415020.5   | 103301.0241 | 7.300319968 |

|            |                                                               |                 |             |             |             |
|------------|---------------------------------------------------------------|-----------------|-------------|-------------|-------------|
| UIJ65321.1 | Rrf2_family_transcriptional_regulator_[Bacillus_cereus]       | CPTF_Cd         | 1695675.6   | 57271.42258 | 3.377498773 |
| UIJ65321.1 | Rrf2_family_transcriptional_regulator_[Bacillus_cereus]       | CPTF_Co         | 1754364.6   | 273223.0526 | 15.57390366 |
| UIJ65321.1 | Rrf2_family_transcriptional_regulator_[Bacillus_cereus]       | CPTF_Cu         | 1637439.333 | 70152.50634 | 4.28428125  |
| UIJ65321.1 | Rrf2_family_transcriptional_regulator_[Bacillus_cereus]       | CPTF_Fe         | 1400665.867 | 112419.2043 | 8.026125789 |
| UIJ65321.1 | Rrf2_family_transcriptional_regulator_[Bacillus_cereus]       | CPTF_Mn         | 1285074.7   | 218019.6432 | 16.96552295 |
| UIJ65321.1 | Rrf2_family_transcriptional_regulator_[Bacillus_cereus]       | CPTF_Ni         | 1428427.267 | 412572.0871 | 28.88296077 |
| UIJ65321.1 | Rrf2_family_transcriptional_regulator_[Bacillus_cereus]       | CPTF_U          | 997784.4667 | 342742.6327 | 34.35036765 |
| UIJ65321.1 | Rrf2_family_transcriptional_regulator_[Bacillus_cereus]       | CPTF_metals_mix | 2416394.667 | 260189.2448 | 10.76766343 |
| UIJ65321.1 | Rrf2_family_transcriptional_regulator_[Bacillus_cereus]       | CPTF_zcontrol   | 1384483.233 | 110370.399  | 7.97195635  |
| UIJ65324.1 | tRNA_threonylcarbamoyladenosine_dehydratase_[Bacillus_cereus] | CPTF_Al         | 0           | 0           | 0           |
| UIJ65324.1 | tRNA_threonylcarbamoyladenosine_dehydratase_[Bacillus_cereus] | CPTF_Cd         | 0           | 0           | 0           |
| UIJ65324.1 | tRNA_threonylcarbamoyladenosine_dehydratase_[Bacillus_cereus] | CPTF_Co         | 0           | 0           | 0           |
| UIJ65324.1 | tRNA_threonylcarbamoyladenosine_dehydratase_[Bacillus_cereus] | CPTF_Cu         | 60702.66667 | 105140.1028 | 173.2050808 |
| UIJ65324.1 | tRNA_threonylcarbamoyladenosine_dehydratase_[Bacillus_cereus] | CPTF_Fe         | 0           | 0           | 0           |
| UIJ65324.1 | tRNA_threonylcarbamoyladenosine_dehydratase_[Bacillus_cereus] | CPTF_Mn         | 0           | 0           | 0           |
| UIJ65324.1 | tRNA_threonylcarbamoyladenosine_dehydratase_[Bacillus_cereus] | CPTF_Ni         | 92752.66667 | 160652.3312 | 173.2050808 |
| UIJ65324.1 | tRNA_threonylcarbamoyladenosine_dehydratase_[Bacillus_cereus] | CPTF_U          | 0           | 0           | 0           |
| UIJ65324.1 | tRNA_threonylcarbamoyladenosine_dehydratase_[Bacillus_cereus] | CPTF_metals_mix | 716508      | 224727.9215 | 31.36432831 |
| UIJ65324.1 | tRNA_threonylcarbamoyladenosine_dehydratase_[Bacillus_cereus] | CPTF_zcontrol   | 0           | 0           | 0           |
| UIJ65325.1 | aspartate--tRNA_ligase_[Bacillus_cereus]                      | CPTF_Al         | 5600435.5   | 484641.5801 | 8.653640956 |
| UIJ65325.1 | aspartate--tRNA_ligase_[Bacillus_cereus]                      | CPTF_Cd         | 5850997.867 | 254325.9659 | 4.346710966 |
| UIJ65325.1 | aspartate--tRNA_ligase_[Bacillus_cereus]                      | CPTF_Co         | 6313616.767 | 320084.3156 | 5.069745717 |
| UIJ65325.1 | aspartate--tRNA_ligase_[Bacillus_cereus]                      | CPTF_Cu         | 5902015.033 | 476808.1638 | 8.078735163 |
| UIJ65325.1 | aspartate--tRNA_ligase_[Bacillus_cereus]                      | CPTF_Fe         | 5662055.267 | 507234.5052 | 8.958487357 |
| UIJ65325.1 | aspartate--tRNA_ligase_[Bacillus_cereus]                      | CPTF_Mn         | 6102347.033 | 1078196.791 | 17.66855908 |
| UIJ65325.1 | aspartate--tRNA_ligase_[Bacillus_cereus]                      | CPTF_Ni         | 5853452.467 | 1091098.492 | 18.64025545 |
| UIJ65325.1 | aspartate--tRNA_ligase_[Bacillus_cereus]                      | CPTF_U          | 6204584.9   | 207394.149  | 3.34259507  |
| UIJ65325.1 | aspartate--tRNA_ligase_[Bacillus_cereus]                      | CPTF_metals_mix | 4720818.3   | 124630.7441 | 2.64002417  |
| UIJ65325.1 | aspartate--tRNA_ligase_[Bacillus_cereus]                      | CPTF_zcontrol   | 5982533.3   | 582417.3768 | 9.735296864 |
| UIJ65326.1 | histidine--tRNA_ligase_[Bacillus_cereus]                      | CPTF_Al         | 784488.5    | 170752.5823 | 21.76610394 |
| UIJ65326.1 | histidine--tRNA_ligase_[Bacillus_cereus]                      | CPTF_Cd         | 866032.5667 | 92700.91311 | 10.70409089 |
| UIJ65326.1 | histidine--tRNA_ligase_[Bacillus_cereus]                      | CPTF_Co         | 816740.9    | 200016.1322 | 24.48954525 |
| UIJ65326.1 | histidine--tRNA_ligase_[Bacillus_cereus]                      | CPTF_Cu         | 953023.2667 | 58628.49954 | 6.151843464 |
| UIJ65326.1 | histidine--tRNA_ligase_[Bacillus_cereus]                      | CPTF_Fe         | 706861.4333 | 183008.5359 | 25.89029861 |
| UIJ65326.1 | histidine--tRNA_ligase_[Bacillus_cereus]                      | CPTF_Mn         | 635635.3    | 56353.34719 | 8.865673003 |
| UIJ65326.1 | histidine--tRNA_ligase_[Bacillus_cereus]                      | CPTF_Ni         | 986614.9    | 160911.5725 | 16.30946102 |
| UIJ65326.1 | histidine--tRNA_ligase_[Bacillus_cereus]                      | CPTF_U          | 699666.5667 | 273269.4864 | 39.05710226 |
| UIJ65326.1 | histidine--tRNA_ligase_[Bacillus_cereus]                      | CPTF_metals_mix | 2179473.067 | 244747.3461 | 11.22965683 |
| UIJ65326.1 | histidine--tRNA_ligase_[Bacillus_cereus]                      | CPTF_zcontrol   | 873960.8    | 183939.6678 | 21.04667255 |
| UIJ65330.1 | adenine_phosphoribosyltransferase_[Bacillus_cereus]           | CPTF_Al         | 773425      | 385861.4738 | 49.88996655 |
| UIJ65330.1 | adenine_phosphoribosyltransferase_[Bacillus_cereus]           | CPTF_Cd         | 925052.3333 | 145486.9859 | 15.727433   |
| UIJ65330.1 | adenine_phosphoribosyltransferase_[Bacillus_cereus]           | CPTF_Co         | 1209598.167 | 243849.9039 | 20.15957949 |
| UIJ65330.1 | adenine_phosphoribosyltransferase_[Bacillus_cereus]           | CPTF_Cu         | 1205931.6   | 193543.4422 | 16.04928855 |
| UIJ65330.1 | adenine_phosphoribosyltransferase_[Bacillus_cereus]           | CPTF_Fe         | 835736.3333 | 284688.8913 | 34.06443874 |
| UIJ65330.1 | adenine_phosphoribosyltransferase_[Bacillus_cereus]           | CPTF_Mn         | 1048076     | 45277.98334 | 4.320104967 |
| UIJ65330.1 | adenine_phosphoribosyltransferase_[Bacillus_cereus]           | CPTF_Ni         | 1015889.667 | 477599.9089 | 47.01297046 |
| UIJ65330.1 | adenine_phosphoribosyltransferase_[Bacillus_cereus]           | CPTF_U          | 569003      | 492815.4309 | 86.61033964 |
| UIJ65330.1 | adenine_phosphoribosyltransferase_[Bacillus_cereus]           | CPTF_metals_mix | 755217.5333 | 230675.7663 | 30.54428109 |
| UIJ65330.1 | adenine_phosphoribosyltransferase_[Bacillus_cereus]           | CPTF_zcontrol   | 757519.6667 | 445608.2432 | 58.82464348 |
| UIJ65333.1 | protein_translocase_subunit_SecDF_[Bacillus_cereus]           | CPTF_Al         | 2328870.733 | 182886.794  | 7.853024703 |
| UIJ65333.1 | protein_translocase_subunit_SecDF_[Bacillus_cereus]           | CPTF_Cd         | 2260837.7   | 423943.426  | 18.75160813 |
| UIJ65333.1 | protein_translocase_subunit_SecDF_[Bacillus_cereus]           | CPTF_Co         | 2411490.533 | 43461.26962 | 1.802257526 |
| UIJ65333.1 | protein_translocase_subunit_SecDF_[Bacillus_cereus]           | CPTF_Cu         | 2481080.9   | 374371.9481 | 15.08906655 |
| UIJ65333.1 | protein_translocase_subunit_SecDF_[Bacillus_cereus]           | CPTF_Fe         | 2557839.167 | 287525.8174 | 11.24096547 |
| UIJ65333.1 | protein_translocase_subunit_SecDF_[Bacillus_cereus]           | CPTF_Mn         | 2192395.2   | 642471.7727 | 29.30456027 |
| UIJ65333.1 | protein_translocase_subunit_SecDF_[Bacillus_cereus]           | CPTF_Ni         | 2251269.933 | 261364.4808 | 11.60964649 |
| UIJ65333.1 | protein_translocase_subunit_SecDF_[Bacillus_cereus]           | CPTF_U          | 2233338.467 | 690785.6587 | 30.93063004 |
| UIJ65333.1 | protein_translocase_subunit_SecDF_[Bacillus_cereus]           | CPTF_metals_mix | 2274022.7   | 239732.0147 | 10.54219972 |
| UIJ65333.1 | protein_translocase_subunit_SecDF_[Bacillus_cereus]           | CPTF_zcontrol   | 2514270.3   | 102399.1043 | 4.072716615 |
| UIJ65338.1 | preprotein_translocase_subunit_YajC_[Bacillus_cereus]         | CPTF_Al         | 515155.8667 | 108943.6521 | 21.14770677 |
| UIJ65338.1 | preprotein_translocase_subunit_YajC_[Bacillus_cereus]         | CPTF_Cd         | 525818      | 97160.97718 | 18.47806222 |

|            |                                                                                         |                 |             |             |             |
|------------|-----------------------------------------------------------------------------------------|-----------------|-------------|-------------|-------------|
| UIJ65338.1 | preprotein_translocase_subunit_YajC_[Bacillus_cereus]                                   | CPTF_Co         | 509354.6667 | 130331.6074 | 25.58759463 |
| UIJ65338.1 | preprotein_translocase_subunit_YajC_[Bacillus_cereus]                                   | CPTF_Cu         | 374676.6667 | 109622.6958 | 29.25794574 |
| UIJ65338.1 | preprotein_translocase_subunit_YajC_[Bacillus_cereus]                                   | CPTF_Fe         | 340596.3333 | 61877.09541 | 18.16728172 |
| UIJ65338.1 | preprotein_translocase_subunit_YajC_[Bacillus_cereus]                                   | CPTF_Mn         | 598347.6667 | 178864.4826 | 29.89306929 |
| UIJ65338.1 | preprotein_translocase_subunit_YajC_[Bacillus_cereus]                                   | CPTF_Ni         | 556114.3333 | 197407.3926 | 35.49762716 |
| UIJ65338.1 | preprotein_translocase_subunit_YajC_[Bacillus_cereus]                                   | CPTF_U          | 325455.3333 | 47364.64517 | 14.55334736 |
| UIJ65338.1 | preprotein_translocase_subunit_YajC_[Bacillus_cereus]                                   | CPTF_metals_mix | 636564.3333 | 39314.01191 | 6.175968374 |
| UIJ65338.1 | preprotein_translocase_subunit_YajC_[Bacillus_cereus]                                   | CPTF_zcontrol   | 391161.9    | 60325.37638 | 15.42209923 |
| UIJ65339.1 | tRNA_guanosine(34)_transglycosylase_Tgt_[Bacillus_cereus]                               | CPTF_Al         | 905969.8333 | 20070.69379 | 2.21538213  |
| UIJ65339.1 | tRNA_guanosine(34)_transglycosylase_Tgt_[Bacillus_cereus]                               | CPTF_Cd         | 956692.5    | 35636.48822 | 3.724967868 |
| UIJ65339.1 | tRNA_guanosine(34)_transglycosylase_Tgt_[Bacillus_cereus]                               | CPTF_Co         | 895374.8333 | 24472.63298 | 2.733227702 |
| UIJ65339.1 | tRNA_guanosine(34)_transglycosylase_Tgt_[Bacillus_cereus]                               | CPTF_Cu         | 858166.8333 | 112680.1318 | 13.13032938 |
| UIJ65339.1 | tRNA_guanosine(34)_transglycosylase_Tgt_[Bacillus_cereus]                               | CPTF_Fe         | 932873      | 116913.8813 | 12.53266857 |
| UIJ65339.1 | tRNA_guanosine(34)_transglycosylase_Tgt_[Bacillus_cereus]                               | CPTF_Mn         | 859970      | 245219.7637 | 28.51492072 |
| UIJ65339.1 | tRNA_guanosine(34)_transglycosylase_Tgt_[Bacillus_cereus]                               | CPTF_Ni         | 955987.8    | 90267.80462 | 9.442359476 |
| UIJ65339.1 | tRNA_guanosine(34)_transglycosylase_Tgt_[Bacillus_cereus]                               | CPTF_U          | 973281.3333 | 51923.86058 | 5.334928227 |
| UIJ65339.1 | tRNA_guanosine(34)_transglycosylase_Tgt_[Bacillus_cereus]                               | CPTF_metals_mix | 1226228.067 | 183685.4366 | 14.97971231 |
| UIJ65339.1 | tRNA_guanosine(34)_transglycosylase_Tgt_[Bacillus_cereus]                               | CPTF_zcontrol   | 918488.4    | 43880.53919 | 4.777473421 |
| UIJ65340.1 | tRNA_preQ1(34)_S-adenosylmethionine_ribosyltransferase-isomerase_QueA_[Bacillus_cereus] | CPTF_Al         | 0           | 0           | 0           |
| UIJ65340.1 | tRNA_preQ1(34)_S-adenosylmethionine_ribosyltransferase-isomerase_QueA_[Bacillus_cereus] | CPTF_Cd         | 0           | 0           | 0           |
| UIJ65340.1 | tRNA_preQ1(34)_S-adenosylmethionine_ribosyltransferase-isomerase_QueA_[Bacillus_cereus] | CPTF_Co         | 0           | 0           | 0           |
| UIJ65340.1 | tRNA_preQ1(34)_S-adenosylmethionine_ribosyltransferase-isomerase_QueA_[Bacillus_cereus] | CPTF_Cu         | 0           | 0           | 0           |
| UIJ65340.1 | tRNA_preQ1(34)_S-adenosylmethionine_ribosyltransferase-isomerase_QueA_[Bacillus_cereus] | CPTF_Fe         | 0           | 0           | 0           |
| UIJ65340.1 | tRNA_preQ1(34)_S-adenosylmethionine_ribosyltransferase-isomerase_QueA_[Bacillus_cereus] | CPTF_Mn         | 0           | 0           | 0           |
| UIJ65340.1 | tRNA_preQ1(34)_S-adenosylmethionine_ribosyltransferase-isomerase_QueA_[Bacillus_cereus] | CPTF_Ni         | 0           | 0           | 0           |
| UIJ65340.1 | tRNA_preQ1(34)_S-adenosylmethionine_ribosyltransferase-isomerase_QueA_[Bacillus_cereus] | CPTF_U          | 0           | 0           | 0           |
| UIJ65340.1 | tRNA_preQ1(34)_S-adenosylmethionine_ribosyltransferase-isomerase_QueA_[Bacillus_cereus] | CPTF_metals_mix | 111179.8    | 56000.31192 | 50.36914253 |
| UIJ65340.1 | tRNA_preQ1(34)_S-adenosylmethionine_ribosyltransferase-isomerase_QueA_[Bacillus_cereus] | CPTF_zcontrol   | 0           | 0           | 0           |
| UIJ65350.1 | carboxylating_nicotinate-nucleotide_diphosphorylase_[Bacillus_cereus]                   | CPTF_Al         | 33522.1     | 29296.07815 | 87.39332604 |
| UIJ65350.1 | carboxylating_nicotinate-nucleotide_diphosphorylase_[Bacillus_cereus]                   | CPTF_Cd         | 66022.26667 | 29727.08774 | 45.02585149 |
| UIJ65350.1 | carboxylating_nicotinate-nucleotide_diphosphorylase_[Bacillus_cereus]                   | CPTF_Co         | 31225.63333 | 7557.088211 | 24.20155303 |
| UIJ65350.1 | carboxylating_nicotinate-nucleotide_diphosphorylase_[Bacillus_cereus]                   | CPTF_Cu         | 0           | 0           | 0           |
| UIJ65350.1 | carboxylating_nicotinate-nucleotide_diphosphorylase_[Bacillus_cereus]                   | CPTF_Fe         | 9748.6      | 16885.0705  | 173.2050808 |
| UIJ65350.1 | carboxylating_nicotinate-nucleotide_diphosphorylase_[Bacillus_cereus]                   | CPTF_Mn         | 25899.03333 | 44858.4416  | 173.2050808 |
| UIJ65350.1 | carboxylating_nicotinate-nucleotide_diphosphorylase_[Bacillus_cereus]                   | CPTF_Ni         | 15441.7     | 26745.80896 | 173.2050808 |
| UIJ65350.1 | carboxylating_nicotinate-nucleotide_diphosphorylase_[Bacillus_cereus]                   | CPTF_U          | 0           | 0           | 0           |
| UIJ65350.1 | carboxylating_nicotinate-nucleotide_diphosphorylase_[Bacillus_cereus]                   | CPTF_metals_mix | 0           | 0           | 0           |
| UIJ65350.1 | carboxylating_nicotinate-nucleotide_diphosphorylase_[Bacillus_cereus]                   | CPTF_zcontrol   | 12843.56667 | 22245.71002 | 173.2050808 |
| UIJ65354.1 | MOSC_domain-containing_protein_[Bacillus_cereus]                                        | CPTF_Al         | 501703      | 4041.792548 | 0.805614586 |
| UIJ65354.1 | MOSC_domain-containing_protein_[Bacillus_cereus]                                        | CPTF_Cd         | 480818.6667 | 135070.6676 | 28.09181028 |
| UIJ65354.1 | MOSC_domain-containing_protein_[Bacillus_cereus]                                        | CPTF_Co         | 508385.5667 | 36467.19601 | 7.173137555 |
| UIJ65354.1 | MOSC_domain-containing_protein_[Bacillus_cereus]                                        | CPTF_Cu         | 498462.3333 | 73248.66338 | 14.69492447 |
| UIJ65354.1 | MOSC_domain-containing_protein_[Bacillus_cereus]                                        | CPTF_Fe         | 495516.3333 | 68990.69506 | 13.92299112 |
| UIJ65354.1 | MOSC_domain-containing_protein_[Bacillus_cereus]                                        | CPTF_Mn         | 432458.3    | 95080.75115 | 21.98610852 |
| UIJ65354.1 | MOSC_domain-containing_protein_[Bacillus_cereus]                                        | CPTF_Ni         | 535381.4333 | 17967.94279 | 3.356101216 |
| UIJ65354.1 | MOSC_domain-containing_protein_[Bacillus_cereus]                                        | CPTF_U          | 613197.4333 | 59783.60631 | 9.749487369 |
| UIJ65354.1 | MOSC_domain-containing_protein_[Bacillus_cereus]                                        | CPTF_metals_mix | 529195.3    | 93623.41823 | 17.69165717 |
| UIJ65354.1 | MOSC_domain-containing_protein_[Bacillus_cereus]                                        | CPTF_zcontrol   | 638179.3333 | 9275.939324 | 1.453500425 |
| UIJ65355.1 | prephenate_dehydratase_[Bacillus_cereus]                                                | CPTF_Al         | 0           | 0           | 0           |
| UIJ65355.1 | prephenate_dehydratase_[Bacillus_cereus]                                                | CPTF_Cd         | 0           | 0           | 0           |
| UIJ65355.1 | prephenate_dehydratase_[Bacillus_cereus]                                                | CPTF_Co         | 0           | 0           | 0           |
| UIJ65355.1 | prephenate_dehydratase_[Bacillus_cereus]                                                | CPTF_Cu         | 14692.63333 | 25448.38743 | 173.2050808 |
| UIJ65355.1 | prephenate_dehydratase_[Bacillus_cereus]                                                | CPTF_Fe         | 16931.93333 | 14832.9859  | 87.60361626 |
| UIJ65355.1 | prephenate_dehydratase_[Bacillus_cereus]                                                | CPTF_Mn         | 0           | 0           | 0           |
| UIJ65355.1 | prephenate_dehydratase_[Bacillus_cereus]                                                | CPTF_Ni         | 0           | 0           | 0           |
| UIJ65355.1 | prephenate_dehydratase_[Bacillus_cereus]                                                | CPTF_U          | 0           | 0           | 0           |
| UIJ65355.1 | prephenate_dehydratase_[Bacillus_cereus]                                                | CPTF_metals_mix | 102543.8667 | 31512.32325 | 30.73057832 |
| UIJ65355.1 | prephenate_dehydratase_[Bacillus_cereus]                                                | CPTF_zcontrol   | 0           | 0           | 0           |
| UIJ65361.1 | GTPase_ObgE_[Bacillus_cereus]                                                           | CPTF_Al         | 696982.8    | 196098.9111 | 28.13540177 |
| UIJ65361.1 | GTPase_ObgE_[Bacillus_cereus]                                                           | CPTF_Cd         | 946417      | 198012.7272 | 20.92235528 |
| UIJ65361.1 | GTPase_ObgE_[Bacillus_cereus]                                                           | CPTF_Co         | 683674.7    | 2652.81482  | 0.388022962 |

|            |                                                               |                 |             |             |             |
|------------|---------------------------------------------------------------|-----------------|-------------|-------------|-------------|
| UIJ65361.1 | GTPase_ObgE_[Bacillus_cereus]                                 | CPTF_Cu         | 806165.7333 | 106405.1291 | 13.1989149  |
| UIJ65361.1 | GTPase_ObgE_[Bacillus_cereus]                                 | CPTF_Fe         | 723349.1667 | 86748.50621 | 11.99261853 |
| UIJ65361.1 | GTPase_ObgE_[Bacillus_cereus]                                 | CPTF_Mn         | 684756.4333 | 210667.9139 | 30.76537928 |
| UIJ65361.1 | GTPase_ObgE_[Bacillus_cereus]                                 | CPTF_Ni         | 625970.7    | 10685.9201  | 1.707095891 |
| UIJ65361.1 | GTPase_ObgE_[Bacillus_cereus]                                 | CPTF_U          | 887726.9    | 475065.1838 | 53.51478972 |
| UIJ65361.1 | GTPase_ObgE_[Bacillus_cereus]                                 | CPTF_metals_mix | 718111.9333 | 98105.11293 | 13.66153497 |
| UIJ65361.1 | GTPase_ObgE_[Bacillus_cereus]                                 | CPTF_zcontrol   | 578690.7333 | 178224.2219 | 30.79783581 |
| UIJ65362.1 | sporulation_initiation_phosphotransferase_B_[Bacillus_cereus] | CPTF_Al         | 83705.63333 | 16897.98218 | 20.18738943 |
| UIJ65362.1 | sporulation_initiation_phosphotransferase_B_[Bacillus_cereus] | CPTF_Cd         | 71065.73333 | 16916.93046 | 23.80462379 |
| UIJ65362.1 | sporulation_initiation_phosphotransferase_B_[Bacillus_cereus] | CPTF_Co         | 55860.26667 | 31701.45448 | 56.75134827 |
| UIJ65362.1 | sporulation_initiation_phosphotransferase_B_[Bacillus_cereus] | CPTF_Cu         | 76841.4     | 55544.27526 | 72.28430932 |
| UIJ65362.1 | sporulation_initiation_phosphotransferase_B_[Bacillus_cereus] | CPTF_Fe         | 69944.9     | 38235.24322 | 54.66480505 |
| UIJ65362.1 | sporulation_initiation_phosphotransferase_B_[Bacillus_cereus] | CPTF_Mn         | 42223.76667 | 12774.83866 | 30.25509013 |
| UIJ65362.1 | sporulation_initiation_phosphotransferase_B_[Bacillus_cereus] | CPTF_Ni         | 46586.43333 | 40675.49294 | 87.31188466 |
| UIJ65362.1 | sporulation_initiation_phosphotransferase_B_[Bacillus_cereus] | CPTF_U          | 61232.73333 | 9109.220499 | 14.87639046 |
| UIJ65362.1 | sporulation_initiation_phosphotransferase_B_[Bacillus_cereus] | CPTF_metals_mix | 27794.3     | 15077.05065 | 54.24511734 |
| UIJ65362.1 | sporulation_initiation_phosphotransferase_B_[Bacillus_cereus] | CPTF_zcontrol   | 44868.76667 | 23264.43647 | 51.84995755 |
| UIJ65363.1 | 50S_ribosomal_protein_L27_[Bacillus_cereus]                   | CPTF_Al         | 9214890.9   | 475394.345  | 5.158979636 |
| UIJ65363.1 | 50S_ribosomal_protein_L27_[Bacillus_cereus]                   | CPTF_Cd         | 10663938.53 | 145360.0199 | 1.363098816 |
| UIJ65363.1 | 50S_ribosomal_protein_L27_[Bacillus_cereus]                   | CPTF_Co         | 9979157     | 96214.98286 | 0.964159426 |
| UIJ65363.1 | 50S_ribosomal_protein_L27_[Bacillus_cereus]                   | CPTF_Cu         | 8735191.333 | 675297.8484 | 7.730773405 |
| UIJ65363.1 | 50S_ribosomal_protein_L27_[Bacillus_cereus]                   | CPTF_Fe         | 9533952     | 1650922.17  | 17.31624168 |
| UIJ65363.1 | 50S_ribosomal_protein_L27_[Bacillus_cereus]                   | CPTF_Mn         | 9602592.633 | 1867705.605 | 19.45001393 |
| UIJ65363.1 | 50S_ribosomal_protein_L27_[Bacillus_cereus]                   | CPTF_Ni         | 7343801     | 1042827.759 | 14.20010916 |
| UIJ65363.1 | 50S_ribosomal_protein_L27_[Bacillus_cereus]                   | CPTF_U          | 7090949.533 | 563900.1497 | 7.952392653 |
| UIJ65363.1 | 50S_ribosomal_protein_L27_[Bacillus_cereus]                   | CPTF_metals_mix | 9187013.733 | 82247.64621 | 0.895259859 |
| UIJ65363.1 | 50S_ribosomal_protein_L27_[Bacillus_cereus]                   | CPTF_zcontrol   | 10162447.93 | 876543.4558 | 8.625318049 |
| UIJ65365.1 | 50S_ribosomal_protein_L21_[Bacillus_cereus]                   | CPTF_Al         | 2561516.333 | 291700.8604 | 11.38781965 |
| UIJ65365.1 | 50S_ribosomal_protein_L21_[Bacillus_cereus]                   | CPTF_Cd         | 3512478     | 171574.847  | 4.884723748 |
| UIJ65365.1 | 50S_ribosomal_protein_L21_[Bacillus_cereus]                   | CPTF_Co         | 2726666.667 | 334713.8081 | 12.27556753 |
| UIJ65365.1 | 50S_ribosomal_protein_L21_[Bacillus_cereus]                   | CPTF_Cu         | 2583333.333 | 130511.813  | 5.052070181 |
| UIJ65365.1 | 50S_ribosomal_protein_L21_[Bacillus_cereus]                   | CPTF_Fe         | 2881496.333 | 522132.4475 | 18.12018435 |
| UIJ65365.1 | 50S_ribosomal_protein_L21_[Bacillus_cereus]                   | CPTF_Mn         | 4167748     | 2907702.301 | 69.76674936 |
| UIJ65365.1 | 50S_ribosomal_protein_L21_[Bacillus_cereus]                   | CPTF_Ni         | 2430000     | 167032.9309 | 6.873783164 |
| UIJ65365.1 | 50S_ribosomal_protein_L21_[Bacillus_cereus]                   | CPTF_U          | 2426385.667 | 356098.285  | 14.67607932 |
| UIJ65365.1 | 50S_ribosomal_protein_L21_[Bacillus_cereus]                   | CPTF_metals_mix | 11630655    | 1105613.93  | 9.506033233 |
| UIJ65365.1 | 50S_ribosomal_protein_L21_[Bacillus_cereus]                   | CPTF_zcontrol   | 2430305.367 | 103640.2793 | 4.26449617  |
| UIJ65369.1 | septum_site-determining_protein_MinD_[Bacillus_cereus]        | CPTF_Al         | 2509139.933 | 70440.26683 | 2.807347087 |
| UIJ65369.1 | septum_site-determining_protein_MinD_[Bacillus_cereus]        | CPTF_Cd         | 2434987.567 | 88638.37799 | 3.640198381 |
| UIJ65369.1 | septum_site-determining_protein_MinD_[Bacillus_cereus]        | CPTF_Co         | 2673383.667 | 169525.98   | 6.341251429 |
| UIJ65369.1 | septum_site-determining_protein_MinD_[Bacillus_cereus]        | CPTF_Cu         | 2610357.933 | 150736.6145 | 5.774557296 |
| UIJ65369.1 | septum_site-determining_protein_MinD_[Bacillus_cereus]        | CPTF_Fe         | 2218606.833 | 205288.7914 | 9.253049631 |
| UIJ65369.1 | septum_site-determining_protein_MinD_[Bacillus_cereus]        | CPTF_Mn         | 2341831.8   | 551755.3073 | 23.56084273 |
| UIJ65369.1 | septum_site-determining_protein_MinD_[Bacillus_cereus]        | CPTF_Ni         | 1680120.2   | 358773.4194 | 21.35403285 |
| UIJ65369.1 | septum_site-determining_protein_MinD_[Bacillus_cereus]        | CPTF_U          | 1569300     | 241621.3195 | 15.39675776 |
| UIJ65369.1 | septum_site-determining_protein_MinD_[Bacillus_cereus]        | CPTF_metals_mix | 3387382.3   | 476788.1596 | 14.07541628 |
| UIJ65369.1 | septum_site-determining_protein_MinD_[Bacillus_cereus]        | CPTF_zcontrol   | 2008318.467 | 397426.8929 | 19.78903742 |
| UIJ65370.1 | septum_site-determining_protein_MinC_[Bacillus_cereus]        | CPTF_Al         | 229137      | 26335.07553 | 11.49315716 |
| UIJ65370.1 | septum_site-determining_protein_MinC_[Bacillus_cereus]        | CPTF_Cd         | 206870.6667 | 41161.4724  | 19.89720102 |
| UIJ65370.1 | septum_site-determining_protein_MinC_[Bacillus_cereus]        | CPTF_Co         | 223132.3333 | 40283.51238 | 18.05364188 |
| UIJ65370.1 | septum_site-determining_protein_MinC_[Bacillus_cereus]        | CPTF_Cu         | 259339      | 14427.82322 | 5.563306415 |
| UIJ65370.1 | septum_site-determining_protein_MinC_[Bacillus_cereus]        | CPTF_Fe         | 264563      | 35780.26047 | 13.5242874  |
| UIJ65370.1 | septum_site-determining_protein_MinC_[Bacillus_cereus]        | CPTF_Mn         | 188313.2667 | 101785.2174 | 54.05100726 |
| UIJ65370.1 | septum_site-determining_protein_MinC_[Bacillus_cereus]        | CPTF_Ni         | 235547.3333 | 38579.24901 | 16.37855478 |
| UIJ65370.1 | septum_site-determining_protein_MinC_[Bacillus_cereus]        | CPTF_U          | 156014.3    | 132435.2194 | 84.88659016 |
| UIJ65370.1 | septum_site-determining_protein_MinC_[Bacillus_cereus]        | CPTF_metals_mix | 209879.6667 | 6070.615894 | 2.89242688  |
| UIJ65370.1 | septum_site-determining_protein_MinC_[Bacillus_cereus]        | CPTF_zcontrol   | 150951.8333 | 92540.88222 | 61.30490778 |
| UIJ65372.1 | rod_shape-determining_protein_MreC_[Bacillus_cereus]          | CPTF_Al         | 129848.1667 | 31445.99011 | 24.21750797 |
| UIJ65372.1 | rod_shape-determining_protein_MreC_[Bacillus_cereus]          | CPTF_Cd         | 46607.3     | 62509.46684 | 134.1194766 |
| UIJ65372.1 | rod_shape-determining_protein_MreC_[Bacillus_cereus]          | CPTF_Co         | 150531.2    | 132186.7751 | 87.81353971 |
| UIJ65372.1 | rod_shape-determining_protein_MreC_[Bacillus_cereus]          | CPTF_Cu         | 197079.6333 | 38277.37283 | 19.42228742 |

|            |                                                        |                 |              |             |             |
|------------|--------------------------------------------------------|-----------------|--------------|-------------|-------------|
| UIJ65372.1 | rod_shape-determining_protein_MreC_[Bacillus_cereus]   | CPTF_Fe         | 43605.33333  | 75526.65281 | 173.2050808 |
| UIJ65372.1 | rod_shape-determining_protein_MreC_[Bacillus_cereus]   | CPTF_Mn         | 38386.66667  | 66487.657   | 173.2050808 |
| UIJ65372.1 | rod_shape-determining_protein_MreC_[Bacillus_cereus]   | CPTF_Ni         | 142014.66667 | 127174.2653 | 89.55009247 |
| UIJ65372.1 | rod_shape-determining_protein_MreC_[Bacillus_cereus]   | CPTF_U          | 49265.4      | 85330.17586 | 173.2050808 |
| UIJ65372.1 | rod_shape-determining_protein_MreC_[Bacillus_cereus]   | CPTF_metals_mix | 398654.4333  | 35224.51944 | 8.835852932 |
| UIJ65372.1 | rod_shape-determining_protein_MreC_[Bacillus_cereus]   | CPTF_zcontrol   | 59150        | 102450.8053 | 173.2050808 |
| UIJ65373.1 | cell_shape-determining_protein_MreB_[Bacillus_cereus]  | CPTF_AI         | 5524383.133  | 331490.821  | 6.000503822 |
| UIJ65373.1 | cell_shape-determining_protein_MreB_[Bacillus_cereus]  | CPTF_Cd         | 5794978.167  | 322962.4369 | 5.573143291 |
| UIJ65373.1 | cell_shape-determining_protein_MreB_[Bacillus_cereus]  | CPTF_Co         | 6247830.7    | 349549.5254 | 5.594734272 |
| UIJ65373.1 | cell_shape-determining_protein_MreB_[Bacillus_cereus]  | CPTF_Cu         | 7275973.733  | 396851.8357 | 5.454278015 |
| UIJ65373.1 | cell_shape-determining_protein_MreB_[Bacillus_cereus]  | CPTF_Fe         | 5458163      | 496616.2842 | 9.098597535 |
| UIJ65373.1 | cell_shape-determining_protein_MreB_[Bacillus_cereus]  | CPTF_Mn         | 5363647.033  | 798943.043  | 14.89551863 |
| UIJ65373.1 | cell_shape-determining_protein_MreB_[Bacillus_cereus]  | CPTF_Ni         | 5238701.433  | 197237.8083 | 3.76501335  |
| UIJ65373.1 | cell_shape-determining_protein_MreB_[Bacillus_cereus]  | CPTF_U          | 4587526.333  | 205018.3766 | 4.469039777 |
| UIJ65373.1 | cell_shape-determining_protein_MreB_[Bacillus_cereus]  | CPTF_metals_mix | 8703264.8    | 460503.5491 | 5.291158659 |
| UIJ65373.1 | cell_shape-determining_protein_MreB_[Bacillus_cereus]  | CPTF_zcontrol   | 5233422.167  | 696845.0873 | 13.3152852  |
| UIJ65378.1 | SMI1/KNR4_family_protein_[Bacillus_cereus]             | CPTF_AI         | 580094.2     | 120763.05   | 20.81783441 |
| UIJ65378.1 | SMI1/KNR4_family_protein_[Bacillus_cereus]             | CPTF_Cd         | 493630.1333  | 287954.1566 | 58.3339908  |
| UIJ65378.1 | SMI1/KNR4_family_protein_[Bacillus_cereus]             | CPTF_Co         | 734091.7667  | 251913.4711 | 34.31634607 |
| UIJ65378.1 | SMI1/KNR4_family_protein_[Bacillus_cereus]             | CPTF_Cu         | 556967.1     | 173452.7601 | 31.1423709  |
| UIJ65378.1 | SMI1/KNR4_family_protein_[Bacillus_cereus]             | CPTF_Fe         | 546302.1667  | 33859.26418 | 6.197900402 |
| UIJ65378.1 | SMI1/KNR4_family_protein_[Bacillus_cereus]             | CPTF_Mn         | 421010.4     | 92607.48142 | 21.99648309 |
| UIJ65378.1 | SMI1/KNR4_family_protein_[Bacillus_cereus]             | CPTF_Ni         | 918912.3333  | 165326.1695 | 17.99150621 |
| UIJ65378.1 | SMI1/KNR4_family_protein_[Bacillus_cereus]             | CPTF_U          | 629543.7333  | 291662.1991 | 46.32914024 |
| UIJ65378.1 | SMI1/KNR4_family_protein_[Bacillus_cereus]             | CPTF_metals_mix | 688796.3     | 27078.46295 | 3.931272998 |
| UIJ65378.1 | SMI1/KNR4_family_protein_[Bacillus_cereus]             | CPTF_zcontrol   | 553103.3333  | 107835.8213 | 19.49650541 |
| UIJ65379.1 | tetratricopeptide_repeat_protein_[Bacillus_cereus]     | CPTF_AI         | 194637.3667  | 65040.51639 | 33.41625378 |
| UIJ65379.1 | tetratricopeptide_repeat_protein_[Bacillus_cereus]     | CPTF_Cd         | 152120.3333  | 83072.73607 | 54.60988301 |
| UIJ65379.1 | tetratricopeptide_repeat_protein_[Bacillus_cereus]     | CPTF_Co         | 187720.9     | 53777.81271 | 28.64774924 |
| UIJ65379.1 | tetratricopeptide_repeat_protein_[Bacillus_cereus]     | CPTF_Cu         | 233580.5333  | 2619.357985 | 1.121393957 |
| UIJ65379.1 | tetratricopeptide_repeat_protein_[Bacillus_cereus]     | CPTF_Fe         | 159452.6     | 62172.11514 | 38.99096982 |
| UIJ65379.1 | tetratricopeptide_repeat_protein_[Bacillus_cereus]     | CPTF_Mn         | 6608.833333  | 11446.83511 | 173.2050808 |
| UIJ65379.1 | tetratricopeptide_repeat_protein_[Bacillus_cereus]     | CPTF_Ni         | 122011       | 45400.12376 | 37.20986121 |
| UIJ65379.1 | tetratricopeptide_repeat_protein_[Bacillus_cereus]     | CPTF_U          | 154051.3     | 109962.0808 | 71.38017064 |
| UIJ65379.1 | tetratricopeptide_repeat_protein_[Bacillus_cereus]     | CPTF_metals_mix | 330315.1333  | 79452.69851 | 24.05360533 |
| UIJ65379.1 | tetratricopeptide_repeat_protein_[Bacillus_cereus]     | CPTF_zcontrol   | 35975.33333  | 38872.10212 | 108.0520971 |
| UIJ65383.1 | hypothetical_protein_LW858_20905_[Bacillus_cereus]     | CPTF_AI         | 226398.6667  | 60601.72833 | 26.76770549 |
| UIJ65383.1 | hypothetical_protein_LW858_20905_[Bacillus_cereus]     | CPTF_Cd         | 318719       | 46730.41446 | 14.66194813 |
| UIJ65383.1 | hypothetical_protein_LW858_20905_[Bacillus_cereus]     | CPTF_Co         | 271965.6667  | 4537.86308  | 1.668542627 |
| UIJ65383.1 | hypothetical_protein_LW858_20905_[Bacillus_cereus]     | CPTF_Cu         | 461435       | 78850.5392  | 17.08811408 |
| UIJ65383.1 | hypothetical_protein_LW858_20905_[Bacillus_cereus]     | CPTF_Fe         | 280444       | 49329.91811 | 17.58993529 |
| UIJ65383.1 | hypothetical_protein_LW858_20905_[Bacillus_cereus]     | CPTF_Mn         | 275702.3333  | 28203.89665 | 10.22983604 |
| UIJ65383.1 | hypothetical_protein_LW858_20905_[Bacillus_cereus]     | CPTF_Ni         | 304806.6667  | 51735.36127 | 16.97317248 |
| UIJ65383.1 | hypothetical_protein_LW858_20905_[Bacillus_cereus]     | CPTF_U          | 334118       | 35724.13543 | 10.69207149 |
| UIJ65383.1 | hypothetical_protein_LW858_20905_[Bacillus_cereus]     | CPTF_metals_mix | 517232.3333  | 45480.39689 | 8.793030513 |
| UIJ65383.1 | hypothetical_protein_LW858_20905_[Bacillus_cereus]     | CPTF_zcontrol   | 271981.6667  | 124908.8814 | 45.92547832 |
| UIJ65389.1 | hypothetical_protein_LW858_20935_[Bacillus_cereus]     | CPTF_AI         | 0            | 0           | 0           |
| UIJ65389.1 | hypothetical_protein_LW858_20935_[Bacillus_cereus]     | CPTF_Cd         | 6010.7       | 10410.83779 | 173.2050808 |
| UIJ65389.1 | hypothetical_protein_LW858_20935_[Bacillus_cereus]     | CPTF_Co         | 0            | 0           | 0           |
| UIJ65389.1 | hypothetical_protein_LW858_20935_[Bacillus_cereus]     | CPTF_Cu         | 0            | 0           | 0           |
| UIJ65389.1 | hypothetical_protein_LW858_20935_[Bacillus_cereus]     | CPTF_Fe         | 0            | 0           | 0           |
| UIJ65389.1 | hypothetical_protein_LW858_20935_[Bacillus_cereus]     | CPTF_Mn         | 0            | 0           | 0           |
| UIJ65389.1 | hypothetical_protein_LW858_20935_[Bacillus_cereus]     | CPTF_Ni         | 0            | 0           | 0           |
| UIJ65389.1 | hypothetical_protein_LW858_20935_[Bacillus_cereus]     | CPTF_U          | 0            | 0           | 0           |
| UIJ65389.1 | hypothetical_protein_LW858_20935_[Bacillus_cereus]     | CPTF_metals_mix | 1020653.5    | 730690.59   | 71.59046533 |
| UIJ65389.1 | hypothetical_protein_LW858_20935_[Bacillus_cereus]     | CPTF_zcontrol   | 0            | 0           | 0           |
| UIJ65395.1 | XRE_family_transcriptional_regulator_[Bacillus_cereus] | CPTF_AI         | 312612       | 198483.2308 | 63.49187838 |
| UIJ65395.1 | XRE_family_transcriptional_regulator_[Bacillus_cereus] | CPTF_Cd         | 70956.66667  | 122900.5518 | 173.2050808 |
| UIJ65395.1 | XRE_family_transcriptional_regulator_[Bacillus_cereus] | CPTF_Co         | 0            | 0           | 0           |
| UIJ65395.1 | XRE_family_transcriptional_regulator_[Bacillus_cereus] | CPTF_Cu         | 113582.0333  | 56101.77507 | 49.39317727 |
| UIJ65395.1 | XRE_family_transcriptional_regulator_[Bacillus_cereus] | CPTF_Fe         | 80094.66667  | 138728.0321 | 173.2050808 |



|            |                                                                                 |                 |             |             |             |
|------------|---------------------------------------------------------------------------------|-----------------|-------------|-------------|-------------|
| UIJ65395.1 | XRE_family_transcriptional_regulator_[Bacillus_cereus]                          | CPTF_Mn         | 136800.9333 | 79112.78443 | 57.83058822 |
| UIJ65395.1 | XRE_family_transcriptional_regulator_[Bacillus_cereus]                          | CPTF_Ni         | 113589      | 102549.341  | 90.28104923 |
| UIJ65395.1 | XRE_family_transcriptional_regulator_[Bacillus_cereus]                          | CPTF_U          | 64769.66667 | 112184.3535 | 173.2050808 |
| UIJ65395.1 | XRE_family_transcriptional_regulator_[Bacillus_cereus]                          | CPTF_metals_mix | 152277      | 158908.4573 | 104.3548647 |
| UIJ65395.1 | XRE_family_transcriptional_regulator_[Bacillus_cereus]                          | CPTF_zcontrol   | 255796.2333 | 200679.5022 | 78.45287619 |
| UIJ65399.1 | bifunctional_tetrahydrofolate_synthase/dihydrofolate_synthase_[Bacillus_cereus] | CPTF_Al         | 0           | 0           | 0           |
| UIJ65399.1 | bifunctional_tetrahydrofolate_synthase/dihydrofolate_synthase_[Bacillus_cereus] | CPTF_Cd         | 0           | 0           | 0           |
| UIJ65399.1 | bifunctional_tetrahydrofolate_synthase/dihydrofolate_synthase_[Bacillus_cereus] | CPTF_Co         | 0           | 0           | 0           |
| UIJ65399.1 | bifunctional_tetrahydrofolate_synthase/dihydrofolate_synthase_[Bacillus_cereus] | CPTF_Cu         | 0           | 0           | 0           |
| UIJ65399.1 | bifunctional_tetrahydrofolate_synthase/dihydrofolate_synthase_[Bacillus_cereus] | CPTF_Fe         | 0           | 0           | 0           |
| UIJ65399.1 | bifunctional_tetrahydrofolate_synthase/dihydrofolate_synthase_[Bacillus_cereus] | CPTF_Mn         | 0           | 0           | 0           |
| UIJ65399.1 | bifunctional_tetrahydrofolate_synthase/dihydrofolate_synthase_[Bacillus_cereus] | CPTF_Ni         | 0           | 0           | 0           |
| UIJ65399.1 | bifunctional_tetrahydrofolate_synthase/dihydrofolate_synthase_[Bacillus_cereus] | CPTF_U          | 0           | 0           | 0           |
| UIJ65399.1 | bifunctional_tetrahydrofolate_synthase/dihydrofolate_synthase_[Bacillus_cereus] | CPTF_metals_mix | 10825.46667 | 18750.25828 | 173.2050808 |
| UIJ65399.1 | bifunctional_tetrahydrofolate_synthase/dihydrofolate_synthase_[Bacillus_cereus] | CPTF_zcontrol   | 0           | 0           | 0           |
| UIJ65400.1 | valine--tRNA_ligase_[Bacillus_cereus]                                           | CPTF_Al         | 5514184.6   | 1184611.966 | 21.48299435 |
| UIJ65400.1 | valine--tRNA_ligase_[Bacillus_cereus]                                           | CPTF_Cd         | 6648240.367 | 149261.2078 | 2.245123515 |
| UIJ65400.1 | valine--tRNA_ligase_[Bacillus_cereus]                                           | CPTF_Co         | 6422738.1   | 318814.2722 | 4.963837342 |
| UIJ65400.1 | valine--tRNA_ligase_[Bacillus_cereus]                                           | CPTF_Cu         | 6004330.8   | 407434.9042 | 6.78568383  |
| UIJ65400.1 | valine--tRNA_ligase_[Bacillus_cereus]                                           | CPTF_Fe         | 5732825.733 | 245057.1153 | 4.274630465 |
| UIJ65400.1 | valine--tRNA_ligase_[Bacillus_cereus]                                           | CPTF_Mn         | 6248461.7   | 258279.7114 | 4.133492751 |
| UIJ65400.1 | valine--tRNA_ligase_[Bacillus_cereus]                                           | CPTF_Ni         | 5435926.567 | 357094.9449 | 6.569164254 |
| UIJ65400.1 | valine--tRNA_ligase_[Bacillus_cereus]                                           | CPTF_U          | 5960278.033 | 803553.3747 | 13.48181025 |
| UIJ65400.1 | valine--tRNA_ligase_[Bacillus_cereus]                                           | CPTF_metals_mix | 9150733.467 | 117072.8481 | 1.279382123 |
| UIJ65400.1 | valine--tRNA_ligase_[Bacillus_cereus]                                           | CPTF_zcontrol   | 5457505.533 | 1634653.961 | 29.95240135 |
| UIJ65403.1 | glutamate-1-semialdehyde_2,1-aminomutase_[Bacillus_cereus]                      | CPTF_Al         | 2820036     | 441524.6826 | 15.65670377 |
| UIJ65403.1 | glutamate-1-semialdehyde_2,1-aminomutase_[Bacillus_cereus]                      | CPTF_Cd         | 3620104     | 180093.7138 | 4.974821547 |
| UIJ65403.1 | glutamate-1-semialdehyde_2,1-aminomutase_[Bacillus_cereus]                      | CPTF_Co         | 2875001.667 | 549247.9305 | 19.10426477 |
| UIJ65403.1 | glutamate-1-semialdehyde_2,1-aminomutase_[Bacillus_cereus]                      | CPTF_Cu         | 3020409.867 | 303775.3384 | 10.05742107 |
| UIJ65403.1 | glutamate-1-semialdehyde_2,1-aminomutase_[Bacillus_cereus]                      | CPTF_Fe         | 2933202.667 | 476025.3407 | 16.22885954 |
| UIJ65403.1 | glutamate-1-semialdehyde_2,1-aminomutase_[Bacillus_cereus]                      | CPTF_Mn         | 2596088.267 | 682146.5134 | 26.27593684 |
| UIJ65403.1 | glutamate-1-semialdehyde_2,1-aminomutase_[Bacillus_cereus]                      | CPTF_Ni         | 2688877.667 | 209870.9058 | 7.805148905 |
| UIJ65403.1 | glutamate-1-semialdehyde_2,1-aminomutase_[Bacillus_cereus]                      | CPTF_U          | 1973271.333 | 516581.4244 | 26.17893524 |
| UIJ65403.1 | glutamate-1-semialdehyde_2,1-aminomutase_[Bacillus_cereus]                      | CPTF_metals_mix | 3806854.567 | 161763.4646 | 4.249268307 |
| UIJ65403.1 | glutamate-1-semialdehyde_2,1-aminomutase_[Bacillus_cereus]                      | CPTF_zcontrol   | 2853840.1   | 463371.872  | 16.23678468 |
| UIJ65404.1 | porphobilinogen_synthase_[Bacillus_cereus]                                      | CPTF_Al         | 3264148.2   | 243729.13   | 7.466852455 |
| UIJ65404.1 | porphobilinogen_synthase_[Bacillus_cereus]                                      | CPTF_Cd         | 3030944.067 | 418810.7915 | 13.81783307 |
| UIJ65404.1 | porphobilinogen_synthase_[Bacillus_cereus]                                      | CPTF_Co         | 2845590.1   | 529674.4065 | 18.61386875 |
| UIJ65404.1 | porphobilinogen_synthase_[Bacillus_cereus]                                      | CPTF_Cu         | 3110266.6   | 119309.919  | 3.836002965 |
| UIJ65404.1 | porphobilinogen_synthase_[Bacillus_cereus]                                      | CPTF_Fe         | 2417538.833 | 41750.38797 | 1.726979    |
| UIJ65404.1 | porphobilinogen_synthase_[Bacillus_cereus]                                      | CPTF_Mn         | 3213942.5   | 181928.5089 | 5.660602482 |
| UIJ65404.1 | porphobilinogen_synthase_[Bacillus_cereus]                                      | CPTF_Ni         | 2461647.2   | 254299.707  | 10.33046925 |
| UIJ65404.1 | porphobilinogen_synthase_[Bacillus_cereus]                                      | CPTF_U          | 2697806.967 | 321356.7373 | 11.91177654 |
| UIJ65404.1 | porphobilinogen_synthase_[Bacillus_cereus]                                      | CPTF_metals_mix | 3173961.967 | 249576.2534 | 7.863240202 |
| UIJ65404.1 | porphobilinogen_synthase_[Bacillus_cereus]                                      | CPTF_zcontrol   | 3162155.2   | 180416.0179 | 5.705476377 |
| UIJ65406.1 | hydroxymethylbilane_synthase_[Bacillus_cereus]                                  | CPTF_Al         | 1768090.5   | 225653.003  | 12.76252562 |
| UIJ65406.1 | hydroxymethylbilane_synthase_[Bacillus_cereus]                                  | CPTF_Cd         | 1555966.2   | 219627.3111 | 14.11517237 |
| UIJ65406.1 | hydroxymethylbilane_synthase_[Bacillus_cereus]                                  | CPTF_Co         | 1555219.9   | 95001.10668 | 6.108532091 |
| UIJ65406.1 | hydroxymethylbilane_synthase_[Bacillus_cereus]                                  | CPTF_Cu         | 1699174.667 | 354703.6686 | 20.87505632 |
| UIJ65406.1 | hydroxymethylbilane_synthase_[Bacillus_cereus]                                  | CPTF_Fe         | 1626128.4   | 190011.9345 | 11.68492811 |
| UIJ65406.1 | hydroxymethylbilane_synthase_[Bacillus_cereus]                                  | CPTF_Mn         | 1578089.167 | 332682.5512 | 21.08135321 |
| UIJ65406.1 | hydroxymethylbilane_synthase_[Bacillus_cereus]                                  | CPTF_Ni         | 1922313.967 | 151650.8739 | 7.888975296 |
| UIJ65406.1 | hydroxymethylbilane_synthase_[Bacillus_cereus]                                  | CPTF_U          | 1159097.933 | 290680.5878 | 25.07817325 |
| UIJ65406.1 | hydroxymethylbilane_synthase_[Bacillus_cereus]                                  | CPTF_metals_mix | 2720863.9   | 142964.5976 | 5.254382536 |
| UIJ65406.1 | hydroxymethylbilane_synthase_[Bacillus_cereus]                                  | CPTF_zcontrol   | 1667854.867 | 191619.5899 | 11.48898467 |
| UIJ65410.1 | organic_hydroperoxide_resistance_protein_[Bacillus_cereus]                      | CPTF_Al         | 763921.6667 | 89988.79917 | 11.77984643 |
| UIJ65410.1 | organic_hydroperoxide_resistance_protein_[Bacillus_cereus]                      | CPTF_Cd         | 960157      | 81382.3709  | 8.475944132 |
| UIJ65410.1 | organic_hydroperoxide_resistance_protein_[Bacillus_cereus]                      | CPTF_Co         | 720883      | 117177.7661 | 16.25475509 |
| UIJ65410.1 | organic_hydroperoxide_resistance_protein_[Bacillus_cereus]                      | CPTF_Cu         | 758531.3333 | 83911.66839 | 11.06238658 |
| UIJ65410.1 | organic_hydroperoxide_resistance_protein_[Bacillus_cereus]                      | CPTF_Fe         | 786915      | 51728.46216 | 6.573576836 |
| UIJ65410.1 | organic_hydroperoxide_resistance_protein_[Bacillus_cereus]                      | CPTF_Mn         | 709235.6667 | 171100.3283 | 24.12460855 |

|            |                                                                       |                 |             |             |             |
|------------|-----------------------------------------------------------------------|-----------------|-------------|-------------|-------------|
| UIJ65410.1 | organic_hydroperoxide_resistance_protein_[Bacillus_cereus]            | CPTF_Ni         | 830108.6667 | 88289.45849 | 10.63589167 |
| UIJ65410.1 | organic_hydroperoxide_resistance_protein_[Bacillus_cereus]            | CPTF_U          | 543237.3333 | 68845.22642 | 12.67313975 |
| UIJ65410.1 | organic_hydroperoxide_resistance_protein_[Bacillus_cereus]            | CPTF_metals_mix | 1003669.667 | 118588.6505 | 11.81550608 |
| UIJ65410.1 | organic_hydroperoxide_resistance_protein_[Bacillus_cereus]            | CPTF_zcontrol   | 586758.6667 | 120036.5651 | 20.45757002 |
| UIJ65412.1 | endopeptidase_La_[Bacillus_cereus]                                    | CPTF_Al         | 1296680.967 | 372586.1739 | 28.73383534 |
| UIJ65412.1 | endopeptidase_La_[Bacillus_cereus]                                    | CPTF_Cd         | 1832781.233 | 246962.2132 | 13.47472402 |
| UIJ65412.1 | endopeptidase_La_[Bacillus_cereus]                                    | CPTF_Co         | 1399017.433 | 130388.0563 | 9.319973662 |
| UIJ65412.1 | endopeptidase_La_[Bacillus_cereus]                                    | CPTF_Cu         | 1345290.433 | 244183.9672 | 18.15102235 |
| UIJ65412.1 | endopeptidase_La_[Bacillus_cereus]                                    | CPTF_Fe         | 1497231.3   | 422188.7732 | 28.19796602 |
| UIJ65412.1 | endopeptidase_La_[Bacillus_cereus]                                    | CPTF_Mn         | 1515996.433 | 530970.9506 | 35.02455144 |
| UIJ65412.1 | endopeptidase_La_[Bacillus_cereus]                                    | CPTF_Ni         | 875619.1333 | 18090.36554 | 2.06600848  |
| UIJ65412.1 | endopeptidase_La_[Bacillus_cereus]                                    | CPTF_U          | 1090547.7   | 197355.091  | 18.09687839 |
| UIJ65412.1 | endopeptidase_La_[Bacillus_cereus]                                    | CPTF_metals_mix | 3199197.167 | 421400.8624 | 13.17208163 |
| UIJ65412.1 | endopeptidase_La_[Bacillus_cereus]                                    | CPTF_zcontrol   | 1325965.433 | 503371.2162 | 37.96261981 |
| UIJ65414.1 | ATP-dependent_Clp_protease_ATP-binding_subunit_ClpX_[Bacillus_cereus] | CPTF_Al         | 7866944.867 | 466124.2241 | 5.925098396 |
| UIJ65414.1 | ATP-dependent_Clp_protease_ATP-binding_subunit_ClpX_[Bacillus_cereus] | CPTF_Cd         | 6590724.133 | 471843.5467 | 7.159206442 |
| UIJ65414.1 | ATP-dependent_Clp_protease_ATP-binding_subunit_ClpX_[Bacillus_cereus] | CPTF_Co         | 8397783.333 | 456025.7078 | 5.430310473 |
| UIJ65414.1 | ATP-dependent_Clp_protease_ATP-binding_subunit_ClpX_[Bacillus_cereus] | CPTF_Cu         | 7861386.4   | 189926.6992 | 2.415944078 |
| UIJ65414.1 | ATP-dependent_Clp_protease_ATP-binding_subunit_ClpX_[Bacillus_cereus] | CPTF_Fe         | 7505894.033 | 335309.5972 | 4.46728392  |
| UIJ65414.1 | ATP-dependent_Clp_protease_ATP-binding_subunit_ClpX_[Bacillus_cereus] | CPTF_Mn         | 8026331.267 | 85224.40898 | 1.061810261 |
| UIJ65414.1 | ATP-dependent_Clp_protease_ATP-binding_subunit_ClpX_[Bacillus_cereus] | CPTF_Ni         | 7827084.6   | 228845.356  | 2.923762393 |
| UIJ65414.1 | ATP-dependent_Clp_protease_ATP-binding_subunit_ClpX_[Bacillus_cereus] | CPTF_U          | 7718686.233 | 458254.8929 | 5.936954541 |
| UIJ65414.1 | ATP-dependent_Clp_protease_ATP-binding_subunit_ClpX_[Bacillus_cereus] | CPTF_metals_mix | 7229791.9   | 348252.0417 | 4.816902706 |
| UIJ65414.1 | ATP-dependent_Clp_protease_ATP-binding_subunit_ClpX_[Bacillus_cereus] | CPTF_zcontrol   | 8537090.1   | 454479.7631 | 5.323591033 |
| UIJ65415.1 | trigger_factor_[Bacillus_cereus]                                      | CPTF_Al         | 24935176.57 | 702835.3803 | 2.818650104 |
| UIJ65415.1 | trigger_factor_[Bacillus_cereus]                                      | CPTF_Cd         | 26613254.97 | 1159149.217 | 4.355533429 |
| UIJ65415.1 | trigger_factor_[Bacillus_cereus]                                      | CPTF_Co         | 24673175.23 | 558349.3477 | 2.262981325 |
| UIJ65415.1 | trigger_factor_[Bacillus_cereus]                                      | CPTF_Cu         | 22648716    | 753989.1607 | 3.329059187 |
| UIJ65415.1 | trigger_factor_[Bacillus_cereus]                                      | CPTF_Fe         | 25168992.57 | 1909384.465 | 7.586257017 |
| UIJ65415.1 | trigger_factor_[Bacillus_cereus]                                      | CPTF_Mn         | 25760286.47 | 2290941.011 | 8.893305648 |
| UIJ65415.1 | trigger_factor_[Bacillus_cereus]                                      | CPTF_Ni         | 21353037.13 | 193434.0341 | 0.905885345 |
| UIJ65415.1 | trigger_factor_[Bacillus_cereus]                                      | CPTF_U          | 23187462.2  | 1399130.381 | 6.033995307 |
| UIJ65415.1 | trigger_factor_[Bacillus_cereus]                                      | CPTF_metals_mix | 26051116.87 | 1980723.928 | 7.60322077  |
| UIJ65415.1 | trigger_factor_[Bacillus_cereus]                                      | CPTF_zcontrol   | 25499265.7  | 1350367.3   | 5.295710534 |
| UIJ65416.1 | hypothetical_protein_LW858_21075_[Bacillus_cereus]                    | CPTF_Al         | 87119.26667 | 51595.3576  | 59.22381991 |
| UIJ65416.1 | hypothetical_protein_LW858_21075_[Bacillus_cereus]                    | CPTF_Cd         | 84366.9     | 43432.51765 | 51.4805186  |
| UIJ65416.1 | hypothetical_protein_LW858_21075_[Bacillus_cereus]                    | CPTF_Co         | 82313.73333 | 14916.26839 | 18.12123905 |
| UIJ65416.1 | hypothetical_protein_LW858_21075_[Bacillus_cereus]                    | CPTF_Cu         | 101244.0333 | 51346.81457 | 50.71589197 |
| UIJ65416.1 | hypothetical_protein_LW858_21075_[Bacillus_cereus]                    | CPTF_Fe         | 64637.93333 | 41820.799   | 64.70008685 |
| UIJ65416.1 | hypothetical_protein_LW858_21075_[Bacillus_cereus]                    | CPTF_Mn         | 53974.4     | 62129.38772 | 115.1089919 |
| UIJ65416.1 | hypothetical_protein_LW858_21075_[Bacillus_cereus]                    | CPTF_Ni         | 84761.66667 | 60399.4153  | 71.25793731 |
| UIJ65416.1 | hypothetical_protein_LW858_21075_[Bacillus_cereus]                    | CPTF_U          | 60033       | 56763.98354 | 94.55463418 |
| UIJ65416.1 | hypothetical_protein_LW858_21075_[Bacillus_cereus]                    | CPTF_metals_mix | 56089.93333 | 19208.41849 | 34.24575027 |
| UIJ65416.1 | hypothetical_protein_LW858_21075_[Bacillus_cereus]                    | CPTF_zcontrol   | 68535.4     | 26322.61177 | 38.40732201 |
| UIJ65418.1 | PH_domain-containing_protein_[Bacillus_cereus]                        | CPTF_Al         | 2066834.133 | 265405.415  | 12.84115695 |
| UIJ65418.1 | PH_domain-containing_protein_[Bacillus_cereus]                        | CPTF_Cd         | 2191189     | 402037.1603 | 18.34789971 |
| UIJ65418.1 | PH_domain-containing_protein_[Bacillus_cereus]                        | CPTF_Co         | 2020607.733 | 562034.4114 | 27.81511731 |
| UIJ65418.1 | PH_domain-containing_protein_[Bacillus_cereus]                        | CPTF_Cu         | 1980244.9   | 91286.82001 | 4.609875274 |
| UIJ65418.1 | PH_domain-containing_protein_[Bacillus_cereus]                        | CPTF_Fe         | 2247263     | 251130.2353 | 11.17493748 |
| UIJ65418.1 | PH_domain-containing_protein_[Bacillus_cereus]                        | CPTF_Mn         | 1948836     | 201957.9128 | 10.36300196 |
| UIJ65418.1 | PH_domain-containing_protein_[Bacillus_cereus]                        | CPTF_Ni         | 1983084.333 | 867271.0695 | 43.73344365 |
| UIJ65418.1 | PH_domain-containing_protein_[Bacillus_cereus]                        | CPTF_U          | 2008817.167 | 240184.58   | 11.9565177  |
| UIJ65418.1 | PH_domain-containing_protein_[Bacillus_cereus]                        | CPTF_metals_mix | 1930457.333 | 106558.561  | 5.519860977 |
| UIJ65418.1 | PH_domain-containing_protein_[Bacillus_cereus]                        | CPTF_zcontrol   | 1901909.933 | 310381.56   | 16.31946679 |
| UIJ65421.1 | XTP/dITP_diphosphatase_[Bacillus_cereus]                              | CPTF_Al         | 166822.0333 | 39588.54585 | 23.73100546 |
| UIJ65421.1 | XTP/dITP_diphosphatase_[Bacillus_cereus]                              | CPTF_Cd         | 197447.7    | 82564.03242 | 41.81564659 |
| UIJ65421.1 | XTP/dITP_diphosphatase_[Bacillus_cereus]                              | CPTF_Co         | 264385.7667 | 12694.22782 | 4.801403638 |
| UIJ65421.1 | XTP/dITP_diphosphatase_[Bacillus_cereus]                              | CPTF_Cu         | 194084.4667 | 42384.46482 | 21.83815405 |
| UIJ65421.1 | XTP/dITP_diphosphatase_[Bacillus_cereus]                              | CPTF_Fe         | 224632.1    | 74519.14046 | 33.17386093 |
| UIJ65421.1 | XTP/dITP_diphosphatase_[Bacillus_cereus]                              | CPTF_Mn         | 208169.5667 | 19736.30298 | 9.480878161 |
| UIJ65421.1 | XTP/dITP_diphosphatase_[Bacillus_cereus]                              | CPTF_Ni         | 37214.33333 | 64457.1161  | 173.2050808 |

|            |                                                                |                 |             |             |             |
|------------|----------------------------------------------------------------|-----------------|-------------|-------------|-------------|
| UIJ65421.1 | XTP/dITP_diphosphatase [Bacillus cereus]                       | CPTF_U          | 139836.3333 | 127276.3653 | 91.01809401 |
| UIJ65421.1 | XTP/dITP_diphosphatase [Bacillus cereus]                       | CPTF_metals_mix | 303682.6567 | 95410.85445 | 31.41794645 |
| UIJ65421.1 | XTP/dITP_diphosphatase [Bacillus cereus]                       | CPTF_zcontrol   | 175171.1667 | 79331.66165 | 45.28808203 |
| UIJ65422.1 | ribonuclease_PH [Bacillus cereus]                              | CPTF_Al         | 89863.5     | 65281.66418 | 72.64536122 |
| UIJ65422.1 | ribonuclease_PH [Bacillus cereus]                              | CPTF_Cd         | 41914.76667 | 6364.813074 | 15.18513302 |
| UIJ65422.1 | ribonuclease_PH [Bacillus cereus]                              | CPTF_Co         | 117884.6    | 67877.87526 | 57.57993433 |
| UIJ65422.1 | ribonuclease_PH [Bacillus cereus]                              | CPTF_Cu         | 103732.2333 | 25283.41993 | 24.37373526 |
| UIJ65422.1 | ribonuclease_PH [Bacillus cereus]                              | CPTF_Fe         | 63455.46667 | 4615.212244 | 7.273151528 |
| UIJ65422.1 | ribonuclease_PH [Bacillus cereus]                              | CPTF_Mn         | 87065.3     | 124372.7926 | 142.8500132 |
| UIJ65422.1 | ribonuclease_PH [Bacillus cereus]                              | CPTF_Ni         | 63683.03333 | 8919.259986 | 14.00570846 |
| UIJ65422.1 | ribonuclease_PH [Bacillus cereus]                              | CPTF_U          | 47049.23333 | 42661.85747 | 90.67492591 |
| UIJ65422.1 | ribonuclease_PH [Bacillus cereus]                              | CPTF_metals_mix | 486039.7667 | 32022.43526 | 6.588439353 |
| UIJ65422.1 | ribonuclease_PH [Bacillus cereus]                              | CPTF_zcontrol   | 0           | 0           | 0           |
| UIJ65424.1 | glutamate_racemase [Bacillus cereus]                           | CPTF_Al         | 0           | 0           | 0           |
| UIJ65424.1 | glutamate_racemase [Bacillus cereus]                           | CPTF_Cd         | 0           | 0           | 0           |
| UIJ65424.1 | glutamate_racemase [Bacillus cereus]                           | CPTF_Co         | 0           | 0           | 0           |
| UIJ65424.1 | glutamate_racemase [Bacillus cereus]                           | CPTF_Cu         | 0           | 0           | 0           |
| UIJ65424.1 | glutamate_racemase [Bacillus cereus]                           | CPTF_Fe         | 0           | 0           | 0           |
| UIJ65424.1 | glutamate_racemase [Bacillus cereus]                           | CPTF_Mn         | 15742.73333 | 27267.21398 | 173.2050808 |
| UIJ65424.1 | glutamate_racemase [Bacillus cereus]                           | CPTF_Ni         | 0           | 0           | 0           |
| UIJ65424.1 | glutamate_racemase [Bacillus cereus]                           | CPTF_U          | 0           | 0           | 0           |
| UIJ65424.1 | glutamate_racemase [Bacillus cereus]                           | CPTF_metals_mix | 232183.6667 | 24767.78973 | 10.66732647 |
| UIJ65424.1 | glutamate_racemase [Bacillus cereus]                           | CPTF_zcontrol   | 0           | 0           | 0           |
| UIJ65438.1 | 5'-nucleotidase_lipoprotein_e(P4)_family [Bacillus cereus]     | CPTF_Al         | 160397      | 20453.2538  | 12.75164361 |
| UIJ65438.1 | 5'-nucleotidase_lipoprotein_e(P4)_family [Bacillus cereus]     | CPTF_Cd         | 103055.3333 | 19859.14929 | 19.27037509 |
| UIJ65438.1 | 5'-nucleotidase_lipoprotein_e(P4)_family [Bacillus cereus]     | CPTF_Co         | 142346      | 19922.8575  | 13.99607822 |
| UIJ65438.1 | 5'-nucleotidase_lipoprotein_e(P4)_family [Bacillus cereus]     | CPTF_Cu         | 58742.16667 | 14505.58837 | 24.69365567 |
| UIJ65438.1 | 5'-nucleotidase_lipoprotein_e(P4)_family [Bacillus cereus]     | CPTF_Fe         | 152971.6667 | 9490.838231 | 6.204311189 |
| UIJ65438.1 | 5'-nucleotidase_lipoprotein_e(P4)_family [Bacillus cereus]     | CPTF_Mn         | 144084.6    | 51276.713   | 35.58792057 |
| UIJ65438.1 | 5'-nucleotidase_lipoprotein_e(P4)_family [Bacillus cereus]     | CPTF_Ni         | 135576.6667 | 15510.13173 | 11.4401188  |
| UIJ65438.1 | 5'-nucleotidase_lipoprotein_e(P4)_family [Bacillus cereus]     | CPTF_U          | 126139.3333 | 109918.6762 | 87.14068265 |
| UIJ65438.1 | 5'-nucleotidase_lipoprotein_e(P4)_family [Bacillus cereus]     | CPTF_metals_mix | 74602.23333 | 57443.37358 | 76.99953609 |
| UIJ65438.1 | 5'-nucleotidase_lipoprotein_e(P4)_family [Bacillus cereus]     | CPTF_zcontrol   | 140594.4    | 69661.10857 | 49.54756987 |
| UIJ65442.1 | acyl-CoA_thioesterase [Bacillus cereus]                        | CPTF_Al         | 0           | 0           | 0           |
| UIJ65442.1 | acyl-CoA_thioesterase [Bacillus cereus]                        | CPTF_Cd         | 0           | 0           | 0           |
| UIJ65442.1 | acyl-CoA_thioesterase [Bacillus cereus]                        | CPTF_Co         | 0           | 0           | 0           |
| UIJ65442.1 | acyl-CoA_thioesterase [Bacillus cereus]                        | CPTF_Cu         | 0           | 0           | 0           |
| UIJ65442.1 | acyl-CoA_thioesterase [Bacillus cereus]                        | CPTF_Fe         | 0           | 0           | 0           |
| UIJ65442.1 | acyl-CoA_thioesterase [Bacillus cereus]                        | CPTF_Mn         | 81935.66667 | 141916.7376 | 173.2050808 |
| UIJ65442.1 | acyl-CoA_thioesterase [Bacillus cereus]                        | CPTF_Ni         | 0           | 0           | 0           |
| UIJ65442.1 | acyl-CoA_thioesterase [Bacillus cereus]                        | CPTF_U          | 0           | 0           | 0           |
| UIJ65442.1 | acyl-CoA_thioesterase [Bacillus cereus]                        | CPTF_metals_mix | 0           | 0           | 0           |
| UIJ65442.1 | acyl-CoA_thioesterase [Bacillus cereus]                        | CPTF_zcontrol   | 0           | 0           | 0           |
| UIJ65443.1 | succinate_dehydrogenase_iron-sulfur_subunit [Bacillus cereus]  | CPTF_Al         | 1230138     | 234178.4286 | 19.0367608  |
| UIJ65443.1 | succinate_dehydrogenase_iron-sulfur_subunit [Bacillus cereus]  | CPTF_Cd         | 1929577.867 | 228747.7441 | 11.85480762 |
| UIJ65443.1 | succinate_dehydrogenase_iron-sulfur_subunit [Bacillus cereus]  | CPTF_Co         | 1518501     | 254656.9694 | 16.77028658 |
| UIJ65443.1 | succinate_dehydrogenase_iron-sulfur_subunit [Bacillus cereus]  | CPTF_Cu         | 1339234     | 67369.09647 | 5.030420111 |
| UIJ65443.1 | succinate_dehydrogenase_iron-sulfur_subunit [Bacillus cereus]  | CPTF_Fe         | 1496876.333 | 197596.9215 | 13.20061765 |
| UIJ65443.1 | succinate_dehydrogenase_iron-sulfur_subunit [Bacillus cereus]  | CPTF_Mn         | 1766916.5   | 487531.227  | 27.59220524 |
| UIJ65443.1 | succinate_dehydrogenase_iron-sulfur_subunit [Bacillus cereus]  | CPTF_Ni         | 1104529.333 | 474887.1913 | 42.99452961 |
| UIJ65443.1 | succinate_dehydrogenase_iron-sulfur_subunit [Bacillus cereus]  | CPTF_U          | 943898.8667 | 448672.8911 | 47.5340004  |
| UIJ65443.1 | succinate_dehydrogenase_iron-sulfur_subunit [Bacillus cereus]  | CPTF_metals_mix | 1645922.133 | 44929.9131  | 2.729771488 |
| UIJ65443.1 | succinate_dehydrogenase_iron-sulfur_subunit [Bacillus cereus]  | CPTF_zcontrol   | 1269104.1   | 127807.3291 | 10.0706734  |
| UIJ65444.1 | succinate_dehydrogenase_flavoprotein_subunit [Bacillus cereus] | CPTF_Al         | 14215126.87 | 1001048.027 | 7.042132205 |
| UIJ65444.1 | succinate_dehydrogenase_flavoprotein_subunit [Bacillus cereus] | CPTF_Cd         | 15557476.6  | 593614.9022 | 3.815624586 |
| UIJ65444.1 | succinate_dehydrogenase_flavoprotein_subunit [Bacillus cereus] | CPTF_Co         | 13810507.03 | 1243109.891 | 9.00118937  |
| UIJ65444.1 | succinate_dehydrogenase_flavoprotein_subunit [Bacillus cereus] | CPTF_Cu         | 12477118.47 | 529295.3729 | 4.242128295 |
| UIJ65444.1 | succinate_dehydrogenase_flavoprotein_subunit [Bacillus cereus] | CPTF_Fe         | 13865064.07 | 122719.3023 | 0.885097261 |
| UIJ65444.1 | succinate_dehydrogenase_flavoprotein_subunit [Bacillus cereus] | CPTF_Mn         | 14040972.97 | 2251588.1   | 16.035841   |
| UIJ65444.1 | succinate_dehydrogenase_flavoprotein_subunit [Bacillus cereus] | CPTF_Ni         | 13856363.6  | 831459.8854 | 6.000563419 |
| UIJ65444.1 | succinate_dehydrogenase_flavoprotein_subunit [Bacillus cereus] | CPTF_U          | 14128591.4  | 645299.867  | 4.567333351 |

|            |                                                                |                 |             |             |             |
|------------|----------------------------------------------------------------|-----------------|-------------|-------------|-------------|
| UIJ65444.1 | succinate_dehydrogenase_flavoprotein_subunit_[Bacillus_cereus] | CPTF_metals_mix | 12178374.07 | 1682027.183 | 13.81159072 |
| UIJ65444.1 | succinate_dehydrogenase_flavoprotein_subunit_[Bacillus_cereus] | CPTF_zcontrol   | 15450807.07 | 368589.609  | 2.385568646 |
| UIJ65445.1 | succinate_dehydrogenase_cytochrome_B558_[Bacillus_cereus]      | CPTF_Al         | 0           | 0           | 0           |
| UIJ65445.1 | succinate_dehydrogenase_cytochrome_B558_[Bacillus_cereus]      | CPTF_Cd         | 43340.86667 | 39096.12056 | 90.20613468 |
| UIJ65445.1 | succinate_dehydrogenase_cytochrome_B558_[Bacillus_cereus]      | CPTF_Co         | 23468.73333 | 9388.070913 | 40.00246106 |
| UIJ65445.1 | succinate_dehydrogenase_cytochrome_B558_[Bacillus_cereus]      | CPTF_Cu         | 0           | 0           | 0           |
| UIJ65445.1 | succinate_dehydrogenase_cytochrome_B558_[Bacillus_cereus]      | CPTF_Fe         | 0           | 0           | 0           |
| UIJ65445.1 | succinate_dehydrogenase_cytochrome_B558_[Bacillus_cereus]      | CPTF_Mn         | 0           | 0           | 0           |
| UIJ65445.1 | succinate_dehydrogenase_cytochrome_B558_[Bacillus_cereus]      | CPTF_Ni         | 0           | 0           | 0           |
| UIJ65445.1 | succinate_dehydrogenase_cytochrome_B558_[Bacillus_cereus]      | CPTF_U          | 0           | 0           | 0           |
| UIJ65445.1 | succinate_dehydrogenase_cytochrome_B558_[Bacillus_cereus]      | CPTF_metals_mix | 158096.6667 | 13426.77721 | 8.492764267 |
| UIJ65445.1 | succinate_dehydrogenase_cytochrome_B558_[Bacillus_cereus]      | CPTF_zcontrol   | 0           | 0           | 0           |
| UIJ65448.1 | thioredoxin_[Bacillus_cereus]                                  | CPTF_Al         | 1747094.333 | 182712.5621 | 10.45808224 |
| UIJ65448.1 | thioredoxin_[Bacillus_cereus]                                  | CPTF_Cd         | 2210711     | 303879.6963 | 13.74579022 |
| UIJ65448.1 | thioredoxin_[Bacillus_cereus]                                  | CPTF_Co         | 1705838.333 | 206117.4072 | 12.08305636 |
| UIJ65448.1 | thioredoxin_[Bacillus_cereus]                                  | CPTF_Cu         | 1744356     | 173342.7308 | 9.937348272 |
| UIJ65448.1 | thioredoxin_[Bacillus_cereus]                                  | CPTF_Fe         | 1725380.667 | 308415.7599 | 17.87522985 |
| UIJ65448.1 | thioredoxin_[Bacillus_cereus]                                  | CPTF_Mn         | 1883862.667 | 770132.3607 | 40.8804938  |
| UIJ65448.1 | thioredoxin_[Bacillus_cereus]                                  | CPTF_Ni         | 1373172     | 189506.0649 | 13.80060654 |
| UIJ65448.1 | thioredoxin_[Bacillus_cereus]                                  | CPTF_U          | 1352917.4   | 590298.4769 | 43.63152376 |
| UIJ65448.1 | thioredoxin_[Bacillus_cereus]                                  | CPTF_metals_mix | 4824637.133 | 682882.7734 | 14.15407531 |
| UIJ65448.1 | thioredoxin_[Bacillus_cereus]                                  | CPTF_zcontrol   | 1458873.667 | 167150.4731 | 11.45750156 |
| UIJ65449.1 | electron_transfer_flavoprotein_subunit_alpha_[Bacillus_cereus] | CPTF_Al         | 12335881.33 | 448272.2291 | 3.633888953 |
| UIJ65449.1 | electron_transfer_flavoprotein_subunit_alpha_[Bacillus_cereus] | CPTF_Cd         | 12339237    | 2393211.295 | 19.39513193 |
| UIJ65449.1 | electron_transfer_flavoprotein_subunit_alpha_[Bacillus_cereus] | CPTF_Co         | 8971462.267 | 2178966.707 | 24.28775424 |
| UIJ65449.1 | electron_transfer_flavoprotein_subunit_alpha_[Bacillus_cereus] | CPTF_Cu         | 9305619.867 | 1404396.629 | 15.09191917 |
| UIJ65449.1 | electron_transfer_flavoprotein_subunit_alpha_[Bacillus_cereus] | CPTF_Fe         | 10897411.87 | 1664193.856 | 15.27145965 |
| UIJ65449.1 | electron_transfer_flavoprotein_subunit_alpha_[Bacillus_cereus] | CPTF_Mn         | 10949211.77 | 3004039.994 | 27.43613018 |
| UIJ65449.1 | electron_transfer_flavoprotein_subunit_alpha_[Bacillus_cereus] | CPTF_Ni         | 8283120.433 | 1116094.713 | 13.47435604 |
| UIJ65449.1 | electron_transfer_flavoprotein_subunit_alpha_[Bacillus_cereus] | CPTF_U          | 9354237.133 | 1394935.076 | 14.91233391 |
| UIJ65449.1 | electron_transfer_flavoprotein_subunit_alpha_[Bacillus_cereus] | CPTF_metals_mix | 14319852.1  | 2441527.254 | 17.04994742 |
| UIJ65449.1 | electron_transfer_flavoprotein_subunit_alpha_[Bacillus_cereus] | CPTF_zcontrol   | 10979316.2  | 121752.3239 | 1.108924469 |
| UIJ65450.1 | electron_transfer_flavoprotein_subunit_beta_[Bacillus_cereus]  | CPTF_Al         | 13121130.47 | 185424.1453 | 1.413172026 |
| UIJ65450.1 | electron_transfer_flavoprotein_subunit_beta_[Bacillus_cereus]  | CPTF_Cd         | 13383796.97 | 298013.7599 | 2.22665738  |
| UIJ65450.1 | electron_transfer_flavoprotein_subunit_beta_[Bacillus_cereus]  | CPTF_Co         | 10704323.17 | 621667.3126 | 5.807628403 |
| UIJ65450.1 | electron_transfer_flavoprotein_subunit_beta_[Bacillus_cereus]  | CPTF_Cu         | 10850340    | 877791.1485 | 8.089987489 |
| UIJ65450.1 | electron_transfer_flavoprotein_subunit_beta_[Bacillus_cereus]  | CPTF_Fe         | 12634567.3  | 582473.2871 | 4.610156195 |
| UIJ65450.1 | electron_transfer_flavoprotein_subunit_beta_[Bacillus_cereus]  | CPTF_Mn         | 13112645.93 | 908614.3503 | 6.929298289 |
| UIJ65450.1 | electron_transfer_flavoprotein_subunit_beta_[Bacillus_cereus]  | CPTF_Ni         | 11708088.67 | 289609.44   | 2.473584274 |
| UIJ65450.1 | electron_transfer_flavoprotein_subunit_beta_[Bacillus_cereus]  | CPTF_U          | 11643923.67 | 350638.0218 | 3.011339062 |
| UIJ65450.1 | electron_transfer_flavoprotein_subunit_beta_[Bacillus_cereus]  | CPTF_metals_mix | 12844005.6  | 788708.2566 | 6.140672008 |
| UIJ65450.1 | electron_transfer_flavoprotein_subunit_beta_[Bacillus_cereus]  | CPTF_zcontrol   | 10922278.33 | 401273.1488 | 3.673896018 |
| UIJ65451.1 | enoyl-CoA_hydratase_[Bacillus_cereus]                          | CPTF_Al         | 5724897.333 | 234424.0897 | 4.094817358 |
| UIJ65451.1 | enoyl-CoA_hydratase_[Bacillus_cereus]                          | CPTF_Cd         | 5686955     | 363699.4079 | 6.395327692 |
| UIJ65451.1 | enoyl-CoA_hydratase_[Bacillus_cereus]                          | CPTF_Co         | 5425479.333 | 213872.691  | 3.94200545  |
| UIJ65451.1 | enoyl-CoA_hydratase_[Bacillus_cereus]                          | CPTF_Cu         | 5729802.667 | 62994.76359 | 1.099422917 |
| UIJ65451.1 | enoyl-CoA_hydratase_[Bacillus_cereus]                          | CPTF_Fe         | 5529952     | 296575.0874 | 5.363086023 |
| UIJ65451.1 | enoyl-CoA_hydratase_[Bacillus_cereus]                          | CPTF_Mn         | 5293575.2   | 568313.8187 | 10.7359166  |
| UIJ65451.1 | enoyl-CoA_hydratase_[Bacillus_cereus]                          | CPTF_Ni         | 5309612     | 558153.8604 | 10.51214025 |
| UIJ65451.1 | enoyl-CoA_hydratase_[Bacillus_cereus]                          | CPTF_U          | 4662293.333 | 277383.545  | 5.949508648 |
| UIJ65451.1 | enoyl-CoA_hydratase_[Bacillus_cereus]                          | CPTF_metals_mix | 5559654.833 | 625879.0012 | 11.25751544 |
| UIJ65451.1 | enoyl-CoA_hydratase_[Bacillus_cereus]                          | CPTF_zcontrol   | 4851384.667 | 90325.63093 | 1.861852587 |
| UIJ65452.1 | TetR_family_transcriptional_regulator_[Bacillus_cereus]        | CPTF_Al         | 10321.43333 | 17877.24694 | 173.2050808 |
| UIJ65452.1 | TetR_family_transcriptional_regulator_[Bacillus_cereus]        | CPTF_Cd         | 0           | 0           | 0           |
| UIJ65452.1 | TetR_family_transcriptional_regulator_[Bacillus_cereus]        | CPTF_Co         | 31133.3     | 53924.45741 | 173.2050808 |
| UIJ65452.1 | TetR_family_transcriptional_regulator_[Bacillus_cereus]        | CPTF_Cu         | 98524.63333 | 13790.77285 | 13.99728411 |
| UIJ65452.1 | TetR_family_transcriptional_regulator_[Bacillus_cereus]        | CPTF_Fe         | 0           | 0           | 0           |
| UIJ65452.1 | TetR_family_transcriptional_regulator_[Bacillus_cereus]        | CPTF_Mn         | 0           | 0           | 0           |
| UIJ65452.1 | TetR_family_transcriptional_regulator_[Bacillus_cereus]        | CPTF_Ni         | 193511.6667 | 15227.32203 | 7.868942631 |
| UIJ65452.1 | TetR_family_transcriptional_regulator_[Bacillus_cereus]        | CPTF_U          | 67308.83333 | 61962.85134 | 92.05753282 |
| UIJ65452.1 | TetR_family_transcriptional_regulator_[Bacillus_cereus]        | CPTF_metals_mix | 17039.3     | 15620.76093 | 91.67489819 |

|            |                                                                              |                 |              |             |             |
|------------|------------------------------------------------------------------------------|-----------------|--------------|-------------|-------------|
| UIJ65452.1 | TetR_family_transcriptional_regulator_[Bacillus_cereus]                      | CPTF_zcontrol   | 0            | 0           | 0           |
| UIJ65455.1 | iron-siderophore_ABC_transporter_substrate-binding_protein_[Bacillus_cereus] | CPTF_Al         | 131950.6667  | 14331.05371 | 10.860918   |
| UIJ65455.1 | iron-siderophore_ABC_transporter_substrate-binding_protein_[Bacillus_cereus] | CPTF_Cd         | 114449.6667  | 99193.78574 | 86.67022686 |
| UIJ65455.1 | iron-siderophore_ABC_transporter_substrate-binding_protein_[Bacillus_cereus] | CPTF_Co         | 206356.3333  | 76810.48024 | 37.22225482 |
| UIJ65455.1 | iron-siderophore_ABC_transporter_substrate-binding_protein_[Bacillus_cereus] | CPTF_Cu         | 419421.3333  | 82755.10262 | 19.73078049 |
| UIJ65455.1 | iron-siderophore_ABC_transporter_substrate-binding_protein_[Bacillus_cereus] | CPTF_Fe         | 0            | 0           | 0           |
| UIJ65455.1 | iron-siderophore_ABC_transporter_substrate-binding_protein_[Bacillus_cereus] | CPTF_Mn         | 49047.66667  | 84953.05066 | 173.2050808 |
| UIJ65455.1 | iron-siderophore_ABC_transporter_substrate-binding_protein_[Bacillus_cereus] | CPTF_Ni         | 100113       | 93430.65621 | 93.32519873 |
| UIJ65455.1 | iron-siderophore_ABC_transporter_substrate-binding_protein_[Bacillus_cereus] | CPTF_U          | 137236.6667  | 127669.1462 | 93.02845171 |
| UIJ65455.1 | iron-siderophore_ABC_transporter_substrate-binding_protein_[Bacillus_cereus] | CPTF_metals_mix | 294670.6667  | 42631.5433  | 14.46752192 |
| UIJ65455.1 | iron-siderophore_ABC_transporter_substrate-binding_protein_[Bacillus_cereus] | CPTF_zcontrol   | 81229.46667  | 75117.67761 | 92.47589661 |
| UIJ65458.1 | DinB_family_protein_[Bacillus_cereus]                                        | CPTF_Al         | 202033       | 190130.5464 | 94.1086587  |
| UIJ65458.1 | DinB_family_protein_[Bacillus_cereus]                                        | CPTF_Cd         | 143142       | 247929.2167 | 173.2050808 |
| UIJ65458.1 | DinB_family_protein_[Bacillus_cereus]                                        | CPTF_Co         | 211501.4667  | 145144.372  | 68.6257047  |
| UIJ65458.1 | DinB_family_protein_[Bacillus_cereus]                                        | CPTF_Cu         | 279447.0667  | 147979.6502 | 52.9544475  |
| UIJ65458.1 | DinB_family_protein_[Bacillus_cereus]                                        | CPTF_Fe         | 132502.6667  | 119770.1699 | 90.39076189 |
| UIJ65458.1 | DinB_family_protein_[Bacillus_cereus]                                        | CPTF_Mn         | 147127.0333  | 193077.0772 | 131.2315438 |
| UIJ65458.1 | DinB_family_protein_[Bacillus_cereus]                                        | CPTF_Ni         | 267121.9333  | 185457.6675 | 69.42809421 |
| UIJ65458.1 | DinB_family_protein_[Bacillus_cereus]                                        | CPTF_U          | 208257.8667  | 291569.6464 | 140.0041454 |
| UIJ65458.1 | DinB_family_protein_[Bacillus_cereus]                                        | CPTF_metals_mix | 105457       | 182656.882  | 173.2050808 |
| UIJ65458.1 | DinB_family_protein_[Bacillus_cereus]                                        | CPTF_zcontrol   | 98484.56667  | 90296.19268 | 91.68562724 |
| UIJ65464.1 | hypothetical_protein_LW858_21360_[Bacillus_cereus]                           | CPTF_Al         | 0            | 0           | 0           |
| UIJ65464.1 | hypothetical_protein_LW858_21360_[Bacillus_cereus]                           | CPTF_Cd         | 0            | 0           | 0           |
| UIJ65464.1 | hypothetical_protein_LW858_21360_[Bacillus_cereus]                           | CPTF_Co         | 0            | 0           | 0           |
| UIJ65464.1 | hypothetical_protein_LW858_21360_[Bacillus_cereus]                           | CPTF_Cu         | 0            | 0           | 0           |
| UIJ65464.1 | hypothetical_protein_LW858_21360_[Bacillus_cereus]                           | CPTF_Fe         | 0            | 0           | 0           |
| UIJ65464.1 | hypothetical_protein_LW858_21360_[Bacillus_cereus]                           | CPTF_Mn         | 0            | 0           | 0           |
| UIJ65464.1 | hypothetical_protein_LW858_21360_[Bacillus_cereus]                           | CPTF_Ni         | 0            | 0           | 0           |
| UIJ65464.1 | hypothetical_protein_LW858_21360_[Bacillus_cereus]                           | CPTF_U          | 0            | 0           | 0           |
| UIJ65464.1 | hypothetical_protein_LW858_21360_[Bacillus_cereus]                           | CPTF_metals_mix | 277440.6667  | 109781.8656 | 39.56949314 |
| UIJ65464.1 | hypothetical_protein_LW858_21360_[Bacillus_cereus]                           | CPTF_zcontrol   | 0            | 0           | 0           |
| UIJ65466.1 | class_I_SAM-dependent_rRNA_methyltransferase_[Bacillus_cereus]               | CPTF_Al         | 34480.33333  | 59721.6892  | 173.2050808 |
| UIJ65466.1 | class_I_SAM-dependent_rRNA_methyltransferase_[Bacillus_cereus]               | CPTF_Cd         | 713333.3333  | 1235529.576 | 173.2050808 |
| UIJ65466.1 | class_I_SAM-dependent_rRNA_methyltransferase_[Bacillus_cereus]               | CPTF_Co         | 1413333.3333 | 1227286.981 | 86.83634298 |
| UIJ65466.1 | class_I_SAM-dependent_rRNA_methyltransferase_[Bacillus_cereus]               | CPTF_Cu         | 619158.9333  | 867460.064  | 140.1029715 |
| UIJ65466.1 | class_I_SAM-dependent_rRNA_methyltransferase_[Bacillus_cereus]               | CPTF_Fe         | 1120000      | 1178855.377 | 105.2549444 |
| UIJ65466.1 | class_I_SAM-dependent_rRNA_methyltransferase_[Bacillus_cereus]               | CPTF_Mn         | 23254.86667  | 40278.61059 | 173.2050808 |
| UIJ65466.1 | class_I_SAM-dependent_rRNA_methyltransferase_[Bacillus_cereus]               | CPTF_Ni         | 130445.3333  | 120940.0725 | 92.7132228  |
| UIJ65466.1 | class_I_SAM-dependent_rRNA_methyltransferase_[Bacillus_cereus]               | CPTF_U          | 0            | 0           | 0           |
| UIJ65466.1 | class_I_SAM-dependent_rRNA_methyltransferase_[Bacillus_cereus]               | CPTF_metals_mix | 72746.7      | 68527.03551 | 94.19951078 |
| UIJ65466.1 | class_I_SAM-dependent_rRNA_methyltransferase_[Bacillus_cereus]               | CPTF_zcontrol   | 0            | 0           | 0           |
| UIJ65477.1 | endonuclease_MutS2_[Bacillus_cereus]                                         | CPTF_Al         | 364327.0667  | 149181.3319 | 40.94709001 |
| UIJ65477.1 | endonuclease_MutS2_[Bacillus_cereus]                                         | CPTF_Cd         | 450560       | 79778.39657 | 17.70649782 |
| UIJ65477.1 | endonuclease_MutS2_[Bacillus_cereus]                                         | CPTF_Co         | 466655.3333  | 29981.18944 | 6.424696623 |
| UIJ65477.1 | endonuclease_MutS2_[Bacillus_cereus]                                         | CPTF_Cu         | 385243.6667  | 219892.1806 | 57.07872696 |
| UIJ65477.1 | endonuclease_MutS2_[Bacillus_cereus]                                         | CPTF_Fe         | 495117.6667  | 40580.521   | 8.196136743 |
| UIJ65477.1 | endonuclease_MutS2_[Bacillus_cereus]                                         | CPTF_Mn         | 152604.4333  | 132175.8939 | 86.61340367 |
| UIJ65477.1 | endonuclease_MutS2_[Bacillus_cereus]                                         | CPTF_Ni         | 512212.7     | 203581.6108 | 39.74552188 |
| UIJ65477.1 | endonuclease_MutS2_[Bacillus_cereus]                                         | CPTF_U          | 412582.3333  | 102236.4188 | 24.77964046 |
| UIJ65477.1 | endonuclease_MutS2_[Bacillus_cereus]                                         | CPTF_metals_mix | 227368.8333  | 90619.0055  | 39.85550885 |
| UIJ65477.1 | endonuclease_MutS2_[Bacillus_cereus]                                         | CPTF_zcontrol   | 332301.1     | 90882.71813 | 27.34950866 |
| UIJ65479.1 | cell_division_protein_ZapA_[Bacillus_cereus]                                 | CPTF_Al         | 103630.3333  | 46533.322   | 44.90318665 |
| UIJ65479.1 | cell_division_protein_ZapA_[Bacillus_cereus]                                 | CPTF_Cd         | 38154.33333  | 66085.24386 | 173.2050808 |
| UIJ65479.1 | cell_division_protein_ZapA_[Bacillus_cereus]                                 | CPTF_Co         | 72817.5      | 21789.33701 | 29.9232149  |
| UIJ65479.1 | cell_division_protein_ZapA_[Bacillus_cereus]                                 | CPTF_Cu         | 101699.5     | 40672.6794  | 39.99299839 |
| UIJ65479.1 | cell_division_protein_ZapA_[Bacillus_cereus]                                 | CPTF_Fe         | 111450.1     | 72487.89372 | 65.04067176 |
| UIJ65479.1 | cell_division_protein_ZapA_[Bacillus_cereus]                                 | CPTF_Mn         | 199008       | 9621.478681 | 4.834719549 |
| UIJ65479.1 | cell_division_protein_ZapA_[Bacillus_cereus]                                 | CPTF_Ni         | 96477.1      | 100537.2318 | 104.2083892 |
| UIJ65479.1 | cell_division_protein_ZapA_[Bacillus_cereus]                                 | CPTF_U          | 112380.2333  | 48505.25593 | 43.16173271 |
| UIJ65479.1 | cell_division_protein_ZapA_[Bacillus_cereus]                                 | CPTF_metals_mix | 89653        | 78065.48734 | 87.07515346 |
| UIJ65479.1 | cell_division_protein_ZapA_[Bacillus_cereus]                                 | CPTF_zcontrol   | 136721       | 33594.28172 | 24.57141311 |

|            |                                                            |                 |              |             |             |
|------------|------------------------------------------------------------|-----------------|--------------|-------------|-------------|
| UIJ65483.1 | asparagine--tRNA_ligase [Bacillus cereus]                  | CPTF_Al         | 20975481.67  | 307453.1926 | 1.465774172 |
| UIJ65483.1 | asparagine--tRNA_ligase [Bacillus cereus]                  | CPTF_Cd         | 21308053.97  | 1328124.418 | 6.232969093 |
| UIJ65483.1 | asparagine--tRNA_ligase [Bacillus cereus]                  | CPTF_Co         | 20601671.13  | 1154672.762 | 5.604752906 |
| UIJ65483.1 | asparagine--tRNA_ligase [Bacillus cereus]                  | CPTF_Cu         | 21735641.87  | 1084491.287 | 4.989460601 |
| UIJ65483.1 | asparagine--tRNA_ligase [Bacillus cereus]                  | CPTF_Fe         | 20663032.8   | 1066182.99  | 5.159857222 |
| UIJ65483.1 | asparagine--tRNA_ligase [Bacillus cereus]                  | CPTF_Mn         | 21016509.23  | 612946.7631 | 2.916501291 |
| UIJ65483.1 | asparagine--tRNA_ligase [Bacillus cereus]                  | CPTF_Ni         | 118787546.83 | 1108434.91  | 5.899838442 |
| UIJ65483.1 | asparagine--tRNA_ligase [Bacillus cereus]                  | CPTF_U          | 17615898.67  | 1258280.382 | 7.142867963 |
| UIJ65483.1 | asparagine--tRNA_ligase [Bacillus cereus]                  | CPTF_metals_mix | 24957541.67  | 2498578.522 | 10.01131664 |
| UIJ65483.1 | asparagine--tRNA_ligase [Bacillus cereus]                  | CPTF_zcontrol   | 20565718.9   | 1037684.633 | 5.045700752 |
| UIJ65484.1 | phenylalanine--tRNA_ligase_subunit_beta [Bacillus cereus]  | CPTF_Al         | 2873545.1    | 175275.8308 | 6.09963737  |
| UIJ65484.1 | phenylalanine--tRNA_ligase_subunit_beta [Bacillus cereus]  | CPTF_Cd         | 2741684.8    | 87852.91087 | 3.204340297 |
| UIJ65484.1 | phenylalanine--tRNA_ligase_subunit_beta [Bacillus cereus]  | CPTF_Co         | 2888565.967  | 57711.69928 | 1.997935598 |
| UIJ65484.1 | phenylalanine--tRNA_ligase_subunit_beta [Bacillus cereus]  | CPTF_Cu         | 2864690.667  | 58302.12373 | 2.03519788  |
| UIJ65484.1 | phenylalanine--tRNA_ligase_subunit_beta [Bacillus cereus]  | CPTF_Fe         | 2778171.5    | 248914.3577 | 8.959646935 |
| UIJ65484.1 | phenylalanine--tRNA_ligase_subunit_beta [Bacillus cereus]  | CPTF_Mn         | 2674435.433  | 200241.5379 | 7.487245174 |
| UIJ65484.1 | phenylalanine--tRNA_ligase_subunit_beta [Bacillus cereus]  | CPTF_Ni         | 2903449.167  | 187993.4571 | 6.474832046 |
| UIJ65484.1 | phenylalanine--tRNA_ligase_subunit_beta [Bacillus cereus]  | CPTF_U          | 2508639.3    | 779450.0077 | 31.07062891 |
| UIJ65484.1 | phenylalanine--tRNA_ligase_subunit_beta [Bacillus cereus]  | CPTF_metals_mix | 3100556.367  | 333897.7094 | 10.76896111 |
| UIJ65484.1 | phenylalanine--tRNA_ligase_subunit_beta [Bacillus cereus]  | CPTF_zcontrol   | 2694584.267  | 87021.21416 | 3.229485722 |
| UIJ65485.1 | phenylalanine--tRNA_ligase_subunit_alpha [Bacillus cereus] | CPTF_Al         | 285635.2667  | 133725.5815 | 46.81690151 |
| UIJ65485.1 | phenylalanine--tRNA_ligase_subunit_alpha [Bacillus cereus] | CPTF_Cd         | 240695.3333  | 9181.306788 | 3.814493061 |
| UIJ65485.1 | phenylalanine--tRNA_ligase_subunit_alpha [Bacillus cereus] | CPTF_Co         | 283806.1     | 56793.60329 | 20.01141036 |
| UIJ65485.1 | phenylalanine--tRNA_ligase_subunit_alpha [Bacillus cereus] | CPTF_Cu         | 264251.6667  | 67878.21061 | 25.68695648 |
| UIJ65485.1 | phenylalanine--tRNA_ligase_subunit_alpha [Bacillus cereus] | CPTF_Fe         | 264132.9333  | 62604.4235  | 23.70186205 |
| UIJ65485.1 | phenylalanine--tRNA_ligase_subunit_alpha [Bacillus cereus] | CPTF_Mn         | 404170.6333  | 129062.1569 | 31.93259139 |
| UIJ65485.1 | phenylalanine--tRNA_ligase_subunit_alpha [Bacillus cereus] | CPTF_Ni         | 265294.3333  | 11747.27893 | 4.428017284 |
| UIJ65485.1 | phenylalanine--tRNA_ligase_subunit_alpha [Bacillus cereus] | CPTF_U          | 278197.8333  | 35047.32656 | 12.59786869 |
| UIJ65485.1 | phenylalanine--tRNA_ligase_subunit_alpha [Bacillus cereus] | CPTF_metals_mix | 688551.5333  | 58490.18969 | 8.49467133  |
| UIJ65485.1 | phenylalanine--tRNA_ligase_subunit_alpha [Bacillus cereus] | CPTF_zcontrol   | 192251.3333  | 21931.33558 | 11.4076377  |
| UIJ65486.1 | RNA_methyltransferase [Bacillus cereus]                    | CPTF_Al         | 170717.6     | 219190.7946 | 128.3937887 |
| UIJ65486.1 | RNA_methyltransferase [Bacillus cereus]                    | CPTF_Cd         | 0            | 0           | 0           |
| UIJ65486.1 | RNA_methyltransferase [Bacillus cereus]                    | CPTF_Co         | 103954       | 180053.6097 | 173.2050808 |
| UIJ65486.1 | RNA_methyltransferase [Bacillus cereus]                    | CPTF_Cu         | 126995.3333  | 219962.3697 | 173.2050808 |
| UIJ65486.1 | RNA_methyltransferase [Bacillus cereus]                    | CPTF_Fe         | 0            | 0           | 0           |
| UIJ65486.1 | RNA_methyltransferase [Bacillus cereus]                    | CPTF_Mn         | 123642.3333  | 214154.8033 | 173.2050808 |
| UIJ65486.1 | RNA_methyltransferase [Bacillus cereus]                    | CPTF_Ni         | 0            | 0           | 0           |
| UIJ65486.1 | RNA_methyltransferase [Bacillus cereus]                    | CPTF_U          | 0            | 0           | 0           |
| UIJ65486.1 | RNA_methyltransferase [Bacillus cereus]                    | CPTF_metals_mix | 422440.8     | 95227.72865 | 22.54226596 |
| UIJ65486.1 | RNA_methyltransferase [Bacillus cereus]                    | CPTF_zcontrol   | 233129.3333  | 206397.4011 | 88.53343256 |
| UIJ65492.1 | M42_family_metallopeptidase [Bacillus cereus]              | CPTF_Al         | 1920997.5    | 244319.3665 | 12.71835942 |
| UIJ65492.1 | M42_family_metallopeptidase [Bacillus cereus]              | CPTF_Cd         | 2058575.2    | 211720.2616 | 10.28479609 |
| UIJ65492.1 | M42_family_metallopeptidase [Bacillus cereus]              | CPTF_Co         | 1956787.833  | 343379.1711 | 17.54810436 |
| UIJ65492.1 | M42_family_metallopeptidase [Bacillus cereus]              | CPTF_Cu         | 2460012.067  | 288539.1003 | 11.72917418 |
| UIJ65492.1 | M42_family_metallopeptidase [Bacillus cereus]              | CPTF_Fe         | 1813232.833  | 433100.6534 | 23.88555102 |
| UIJ65492.1 | M42_family_metallopeptidase [Bacillus cereus]              | CPTF_Mn         | 1801222.9    | 187759.5735 | 10.42400546 |
| UIJ65492.1 | M42_family_metallopeptidase [Bacillus cereus]              | CPTF_Ni         | 1808028.367  | 338542.8325 | 18.72442041 |
| UIJ65492.1 | M42_family_metallopeptidase [Bacillus cereus]              | CPTF_U          | 1605504.1    | 179131.5243 | 11.15733833 |
| UIJ65492.1 | M42_family_metallopeptidase [Bacillus cereus]              | CPTF_metals_mix | 3217256.667  | 73167.00544 | 2.274204797 |
| UIJ65492.1 | M42_family_metallopeptidase [Bacillus cereus]              | CPTF_zcontrol   | 1552025.633  | 216419.5971 | 13.94433136 |
| UIJ65493.1 | dUTP_diphosphatase [Bacillus cereus]                       | CPTF_Al         | 143465.3     | 55697.59639 | 38.8230439  |
| UIJ65493.1 | dUTP_diphosphatase [Bacillus cereus]                       | CPTF_Cd         | 226207.3333  | 59171.52154 | 26.15809164 |
| UIJ65493.1 | dUTP_diphosphatase [Bacillus cereus]                       | CPTF_Co         | 153881.8667  | 45674.4596  | 29.68150867 |
| UIJ65493.1 | dUTP_diphosphatase [Bacillus cereus]                       | CPTF_Cu         | 229861.5     | 102333.4872 | 44.51962909 |
| UIJ65493.1 | dUTP_diphosphatase [Bacillus cereus]                       | CPTF_Fe         | 144388.1     | 37187.8096  | 25.75545325 |
| UIJ65493.1 | dUTP_diphosphatase [Bacillus cereus]                       | CPTF_Mn         | 85934.33333  | 77133.04409 | 89.75812239 |
| UIJ65493.1 | dUTP_diphosphatase [Bacillus cereus]                       | CPTF_Ni         | 138066.4     | 93566.64563 | 67.76930928 |
| UIJ65493.1 | dUTP_diphosphatase [Bacillus cereus]                       | CPTF_U          | 35678.7      | 35634.53242 | 99.87620744 |
| UIJ65493.1 | dUTP_diphosphatase [Bacillus cereus]                       | CPTF_metals_mix | 322229       | 11083.84694 | 3.439742215 |
| UIJ65493.1 | dUTP_diphosphatase [Bacillus cereus]                       | CPTF_zcontrol   | 138609.3333  | 70440.73255 | 50.81961716 |
| UIJ65494.1 | 50S_ribosomal_protein_L20 [Bacillus cereus]                | CPTF_Al         | 6555812.667  | 239461.8362 | 3.652664412 |

|            |                                                            |                 |             |             |              |
|------------|------------------------------------------------------------|-----------------|-------------|-------------|--------------|
| UIJ65494.1 | 50S_ribosomal_protein_L20_[Bacillus_cereus]                | CPTF_Cd         | 6752593.667 | 628753.8947 | 9.311294677  |
| UIJ65494.1 | 50S_ribosomal_protein_L20_[Bacillus_cereus]                | CPTF_Co         | 6684522.667 | 198663.6204 | 2.971994117  |
| UIJ65494.1 | 50S_ribosomal_protein_L20_[Bacillus_cereus]                | CPTF_Cu         | 6522724.333 | 219758.7139 | 3.369124658  |
| UIJ65494.1 | 50S_ribosomal_protein_L20_[Bacillus_cereus]                | CPTF_Fe         | 6658417     | 428708.6901 | 6.438597795  |
| UIJ65494.1 | 50S_ribosomal_protein_L20_[Bacillus_cereus]                | CPTF_Mn         | 6298133.667 | 891681.4406 | 14.15786783  |
| UIJ65494.1 | 50S_ribosomal_protein_L20_[Bacillus_cereus]                | CPTF_Ni         | 5674345.533 | 325402.8534 | 5.734632328  |
| UIJ65494.1 | 50S_ribosomal_protein_L20_[Bacillus_cereus]                | CPTF_U          | 5511305     | 862070.2229 | 15.64185293  |
| UIJ65494.1 | 50S_ribosomal_protein_L20_[Bacillus_cereus]                | CPTF_metals_mix | 7009044.233 | 881600.6714 | 12.57804405  |
| UIJ65494.1 | 50S_ribosomal_protein_L20_[Bacillus_cereus]                | CPTF_zcontrol   | 6075775     | 493772.4001 | 8.126903977  |
| UIJ65495.1 | 50S_ribosomal_protein_L35_[Bacillus_cereus]                | CPTF_AI         | 7973816     | 440709.566  | 5.526959313  |
| UIJ65495.1 | 50S_ribosomal_protein_L35_[Bacillus_cereus]                | CPTF_Cd         | 9297187.133 | 433834.8186 | 4.666301887  |
| UIJ65495.1 | 50S_ribosomal_protein_L35_[Bacillus_cereus]                | CPTF_Co         | 8316119     | 172666.5044 | 2.076287081  |
| UIJ65495.1 | 50S_ribosomal_protein_L35_[Bacillus_cereus]                | CPTF_Cu         | 7514655.333 | 203841.1291 | 2.712581217  |
| UIJ65495.1 | 50S_ribosomal_protein_L35_[Bacillus_cereus]                | CPTF_Fe         | 8618125     | 507442.2613 | 5.888081936  |
| UIJ65495.1 | 50S_ribosomal_protein_L35_[Bacillus_cereus]                | CPTF_Mn         | 8614201.133 | 566058.9424 | 6.57122969   |
| UIJ65495.1 | 50S_ribosomal_protein_L35_[Bacillus_cereus]                | CPTF_Ni         | 6848311.333 | 227216.9615 | 3.317853854  |
| UIJ65495.1 | 50S_ribosomal_protein_L35_[Bacillus_cereus]                | CPTF_U          | 7009884.167 | 857327.4771 | 12.23026596  |
| UIJ65495.1 | 50S_ribosomal_protein_L35_[Bacillus_cereus]                | CPTF_metals_mix | 6290597     | 511372.3436 | 8.129154412  |
| UIJ65495.1 | 50S_ribosomal_protein_L35_[Bacillus_cereus]                | CPTF_zcontrol   | 8943804.433 | 846065.4874 | 9.459794137  |
| UIJ65496.1 | translation_initiation_factor_IF-3_[Bacillus_cereus]       | CPTF_AI         | 673313.6667 | 70182.66812 | 10.42347298  |
| UIJ65496.1 | translation_initiation_factor_IF-3_[Bacillus_cereus]       | CPTF_Cd         | 760216.3333 | 40613.8748  | 5.342410182  |
| UIJ65496.1 | translation_initiation_factor_IF-3_[Bacillus_cereus]       | CPTF_Co         | 724682.6667 | 36500.8639  | 5.036806533  |
| UIJ65496.1 | translation_initiation_factor_IF-3_[Bacillus_cereus]       | CPTF_Cu         | 665272      | 82870.90274 | 12.45669482  |
| UIJ65496.1 | translation_initiation_factor_IF-3_[Bacillus_cereus]       | CPTF_Fe         | 769576.6667 | 54542.40837 | 7.087326153  |
| UIJ65496.1 | translation_initiation_factor_IF-3_[Bacillus_cereus]       | CPTF_Mn         | 723906.6667 | 102991.8563 | 14.2272286   |
| UIJ65496.1 | translation_initiation_factor_IF-3_[Bacillus_cereus]       | CPTF_Ni         | 572440      | 14430.71381 | 15.250912901 |
| UIJ65496.1 | translation_initiation_factor_IF-3_[Bacillus_cereus]       | CPTF_U          | 642674.3333 | 65327.11257 | 10.16488588  |
| UIJ65496.1 | translation_initiation_factor_IF-3_[Bacillus_cereus]       | CPTF_metals_mix | 629856.7333 | 103134.0986 | 16.37421547  |
| UIJ65496.1 | translation_initiation_factor_IF-3_[Bacillus_cereus]       | CPTF_zcontrol   | 694212.6667 | 294628.789  | 0.424407106  |
| UIJ65497.1 | threonine--tRNA_ligase_[Bacillus_cereus]                   | CPTF_AI         | 7495966.8   | 169904.3883 | 2.266610737  |
| UIJ65497.1 | threonine--tRNA_ligase_[Bacillus_cereus]                   | CPTF_Cd         | 7052529.567 | 414149.4756 | 5.872353624  |
| UIJ65497.1 | threonine--tRNA_ligase_[Bacillus_cereus]                   | CPTF_Co         | 7292993.4   | 552907.0142 | 7.581345326  |
| UIJ65497.1 | threonine--tRNA_ligase_[Bacillus_cereus]                   | CPTF_Cu         | 6968080.867 | 778174.6536 | 11.16770411  |
| UIJ65497.1 | threonine--tRNA_ligase_[Bacillus_cereus]                   | CPTF_Fe         | 6726103.967 | 476151.8466 | 7.079162751  |
| UIJ65497.1 | threonine--tRNA_ligase_[Bacillus_cereus]                   | CPTF_Mn         | 7158006.7   | 1473789.684 | 20.58938676  |
| UIJ65497.1 | threonine--tRNA_ligase_[Bacillus_cereus]                   | CPTF_Ni         | 6993622.333 | 750101.9707 | 10.7255144   |
| UIJ65497.1 | threonine--tRNA_ligase_[Bacillus_cereus]                   | CPTF_U          | 6413831.867 | 808065.2367 | 12.59879045  |
| UIJ65497.1 | threonine--tRNA_ligase_[Bacillus_cereus]                   | CPTF_metals_mix | 7079360.603 | 964631.0926 | 13.62596351  |
| UIJ65497.1 | threonine--tRNA_ligase_[Bacillus_cereus]                   | CPTF_zcontrol   | 6733233.62  | 359689.8396 | 5.34200742   |
| UIJ65502.1 | transcriptional_regulator_NrdR_[Bacillus_cereus]           | CPTF_AI         | 692701.6667 | 137991.8319 | 19.92081707  |
| UIJ65502.1 | transcriptional_regulator_NrdR_[Bacillus_cereus]           | CPTF_Cd         | 708346.8    | 206659.2507 | 29.17486896  |
| UIJ65502.1 | transcriptional_regulator_NrdR_[Bacillus_cereus]           | CPTF_Co         | 755061.6667 | 51381.60054 | 6.804954193  |
| UIJ65502.1 | transcriptional_regulator_NrdR_[Bacillus_cereus]           | CPTF_Cu         | 799291.3333 | 161112.8442 | 20.15696123  |
| UIJ65502.1 | transcriptional_regulator_NrdR_[Bacillus_cereus]           | CPTF_Fe         | 531771.6667 | 184384.4482 | 34.6736127   |
| UIJ65502.1 | transcriptional_regulator_NrdR_[Bacillus_cereus]           | CPTF_Mn         | 651114.7333 | 59425.00674 | 9.126656747  |
| UIJ65502.1 | transcriptional_regulator_NrdR_[Bacillus_cereus]           | CPTF_Ni         | 652517.3333 | 71772.70401 | 10.99935593  |
| UIJ65502.1 | transcriptional_regulator_NrdR_[Bacillus_cereus]           | CPTF_U          | 551506.8667 | 69468.13554 | 12.59605995  |
| UIJ65502.1 | transcriptional_regulator_NrdR_[Bacillus_cereus]           | CPTF_metals_mix | 957492.5667 | 15978.2877  | 1.668763629  |
| UIJ65502.1 | transcriptional_regulator_NrdR_[Bacillus_cereus]           | CPTF_zcontrol   | 636967.3333 | 176240.3329 | 27.66866113  |
| UIJ65503.1 | glyceraldehyde-3-phosphate_dehydrogenase_[Bacillus_cereus] | CPTF_AI         | 548689.8333 | 205986.9362 | 37.54159886  |
| UIJ65503.1 | glyceraldehyde-3-phosphate_dehydrogenase_[Bacillus_cereus] | CPTF_Cd         | 985769.3667 | 147052.7553 | 14.91756188  |
| UIJ65503.1 | glyceraldehyde-3-phosphate_dehydrogenase_[Bacillus_cereus] | CPTF_Co         | 477617.2667 | 116529.3669 | 24.3980641   |
| UIJ65503.1 | glyceraldehyde-3-phosphate_dehydrogenase_[Bacillus_cereus] | CPTF_Cu         | 666296.7333 | 49550.48709 | 7.436699688  |
| UIJ65503.1 | glyceraldehyde-3-phosphate_dehydrogenase_[Bacillus_cereus] | CPTF_Fe         | 799174.9    | 120577.7034 | 15.08777407  |
| UIJ65503.1 | glyceraldehyde-3-phosphate_dehydrogenase_[Bacillus_cereus] | CPTF_Mn         | 630855.2333 | 349957.1579 | 55.47344927  |
| UIJ65503.1 | glyceraldehyde-3-phosphate_dehydrogenase_[Bacillus_cereus] | CPTF_Ni         | 507992.5667 | 29221.4925  | 5.752346474  |
| UIJ65503.1 | glyceraldehyde-3-phosphate_dehydrogenase_[Bacillus_cereus] | CPTF_U          | 515834.0333 | 102883.4827 | 19.94507458  |
| UIJ65503.1 | glyceraldehyde-3-phosphate_dehydrogenase_[Bacillus_cereus] | CPTF_metals_mix | 2379239.733 | 123111.2207 | 5.174393272  |
| UIJ65503.1 | glyceraldehyde-3-phosphate_dehydrogenase_[Bacillus_cereus] | CPTF_zcontrol   | 397959.5    | 142742.847  | 35.86868688  |
| UIJ65504.1 | dephospho-CoA_kinase_[Bacillus_cereus]                     | CPTF_AI         | 266406.6    | 236217.1448 | 88.66790267  |
| UIJ65504.1 | dephospho-CoA_kinase_[Bacillus_cereus]                     | CPTF_Cd         | 201032.3333 | 165365.6497 | 82.25823525  |

|            |                                                                                |                 |             |             |             |
|------------|--------------------------------------------------------------------------------|-----------------|-------------|-------------|-------------|
| UIJ65504.1 | dephospho-CoA_kinase_[Bacillus_cereus]                                         | CPTF_Co         | 234204.0333 | 162025.3543 | 69.18128265 |
| UIJ65504.1 | dephospho-CoA_kinase_[Bacillus_cereus]                                         | CPTF_Cu         | 353333.8333 | 128626.5129 | 36.40367854 |
| UIJ65504.1 | dephospho-CoA_kinase_[Bacillus_cereus]                                         | CPTF_Fe         | 276816.7    | 252727.8656 | 91.29791145 |
| UIJ65504.1 | dephospho-CoA_kinase_[Bacillus_cereus]                                         | CPTF_Mn         | 163701.6667 | 283539.604  | 173.2050808 |
| UIJ65504.1 | dephospho-CoA_kinase_[Bacillus_cereus]                                         | CPTF_Ni         | 396158.1667 | 148552.1411 | 37.49818975 |
| UIJ65504.1 | dephospho-CoA_kinase_[Bacillus_cereus]                                         | CPTF_U          | 145095.6    | 170700.6677 | 117.6470325 |
| UIJ65504.1 | dephospho-CoA_kinase_[Bacillus_cereus]                                         | CPTF_metals_mix | 367803.1333 | 43993.03862 | 11.96102878 |
| UIJ65504.1 | dephospho-CoA_kinase_[Bacillus_cereus]                                         | CPTF_zcontrol   | 14910.1     | 25825.05075 | 173.2050808 |
| UIJ65506.1 | DNA-formamidopyrimidine_glycosylase_[Bacillus_cereus]                          | CPTF_Al         | 1086666.667 | 1882161.878 | 173.2050808 |
| UIJ65506.1 | DNA-formamidopyrimidine_glycosylase_[Bacillus_cereus]                          | CPTF_Cd         | 0           | 0           | 0           |
| UIJ65506.1 | DNA-formamidopyrimidine_glycosylase_[Bacillus_cereus]                          | CPTF_Co         | 3296666.667 | 225018.5178 | 6.825637546 |
| UIJ65506.1 | DNA-formamidopyrimidine_glycosylase_[Bacillus_cereus]                          | CPTF_Cu         | 1940000     | 1712191.578 | 88.25729784 |
| UIJ65506.1 | DNA-formamidopyrimidine_glycosylase_[Bacillus_cereus]                          | CPTF_Fe         | 736666.6667 | 1275944.095 | 173.2050808 |
| UIJ65506.1 | DNA-formamidopyrimidine_glycosylase_[Bacillus_cereus]                          | CPTF_Mn         | 2710000     | 2423654.266 | 89.43373674 |
| UIJ65506.1 | DNA-formamidopyrimidine_glycosylase_[Bacillus_cereus]                          | CPTF_Ni         | 1633333.333 | 1459600.402 | 89.36328991 |
| UIJ65506.1 | DNA-formamidopyrimidine_glycosylase_[Bacillus_cereus]                          | CPTF_U          | 0           | 0           | 0           |
| UIJ65506.1 | DNA-formamidopyrimidine_glycosylase_[Bacillus_cereus]                          | CPTF_metals_mix | 1843333.333 | 3192746.989 | 173.2050808 |
| UIJ65506.1 | DNA-formamidopyrimidine_glycosylase_[Bacillus_cereus]                          | CPTF_zcontrol   | 1500000     | 2598076.211 | 173.2050808 |
| UIJ65507.1 | DNA_polymerase_I_[Bacillus_cereus]                                             | CPTF_Al         | 1525882.9   | 530783.3781 | 34.78532842 |
| UIJ65507.1 | DNA_polymerase_I_[Bacillus_cereus]                                             | CPTF_Cd         | 2015456.267 | 876269.5266 | 43.47747808 |
| UIJ65507.1 | DNA_polymerase_I_[Bacillus_cereus]                                             | CPTF_Co         | 1567278.867 | 668274.6133 | 42.63916445 |
| UIJ65507.1 | DNA_polymerase_I_[Bacillus_cereus]                                             | CPTF_Cu         | 1826006.433 | 198023.0418 | 10.84459716 |
| UIJ65507.1 | DNA_polymerase_I_[Bacillus_cereus]                                             | CPTF_Fe         | 1207430     | 534772.5566 | 44.29014987 |
| UIJ65507.1 | DNA_polymerase_I_[Bacillus_cereus]                                             | CPTF_Mn         | 1577527.967 | 194709.2651 | 12.3426823  |
| UIJ65507.1 | DNA_polymerase_I_[Bacillus_cereus]                                             | CPTF_Ni         | 1516523.467 | 582423.2063 | 38.40515621 |
| UIJ65507.1 | DNA_polymerase_I_[Bacillus_cereus]                                             | CPTF_U          | 1587319.867 | 115585.9053 | 7.281828178 |
| UIJ65507.1 | DNA_polymerase_I_[Bacillus_cereus]                                             | CPTF_metals_mix | 3331341.667 | 401921.7169 | 12.06486026 |
| UIJ65507.1 | DNA_polymerase_I_[Bacillus_cereus]                                             | CPTF_zcontrol   | 1604593.4   | 893034.9092 | 55.65490356 |
| UIJ65511.1 | MaoC_family_dehydratase_N-terminal_domain-containing_protein_[Bacillus_cereus] | CPTF_Al         | 199092.6333 | 95506.5287  | 47.97091247 |
| UIJ65511.1 | MaoC_family_dehydratase_N-terminal_domain-containing_protein_[Bacillus_cereus] | CPTF_Cd         | 114400.9    | 103651.1856 | 90.60347046 |
| UIJ65511.1 | MaoC_family_dehydratase_N-terminal_domain-containing_protein_[Bacillus_cereus] | CPTF_Co         | 159844.6    | 143247.6888 | 89.61684586 |
| UIJ65511.1 | MaoC_family_dehydratase_N-terminal_domain-containing_protein_[Bacillus_cereus] | CPTF_Cu         | 177748.8333 | 52156.54592 | 29.34283446 |
| UIJ65511.1 | MaoC_family_dehydratase_N-terminal_domain-containing_protein_[Bacillus_cereus] | CPTF_Fe         | 189112.6    | 166069.0733 | 87.81491731 |
| UIJ65511.1 | MaoC_family_dehydratase_N-terminal_domain-containing_protein_[Bacillus_cereus] | CPTF_Mn         | 37743.56667 | 33902.79224 | 89.82402894 |
| UIJ65511.1 | MaoC_family_dehydratase_N-terminal_domain-containing_protein_[Bacillus_cereus] | CPTF_Ni         | 173708.3333 | 162265.8118 | 93.4127964  |
| UIJ65511.1 | MaoC_family_dehydratase_N-terminal_domain-containing_protein_[Bacillus_cereus] | CPTF_U          | 179246      | 163901.2092 | 91.43925623 |
| UIJ65511.1 | MaoC_family_dehydratase_N-terminal_domain-containing_protein_[Bacillus_cereus] | CPTF_metals_mix | 86350.63333 | 44106.41646 | 51.07827789 |
| UIJ65511.1 | MaoC_family_dehydratase_N-terminal_domain-containing_protein_[Bacillus_cereus] | CPTF_zcontrol   | 284379.1333 | 62282.49045 | 21.90121677 |
| UIJ65512.1 | malate_dehydrogenase_[Bacillus_cereus]                                         | CPTF_Al         | 1685545.867 | 297205.5358 | 17.63259854 |
| UIJ65512.1 | malate_dehydrogenase_[Bacillus_cereus]                                         | CPTF_Cd         | 2322062.533 | 376519.9117 | 16.21489113 |
| UIJ65512.1 | malate_dehydrogenase_[Bacillus_cereus]                                         | CPTF_Co         | 1409652.8   | 291019.9156 | 20.64479392 |
| UIJ65512.1 | malate_dehydrogenase_[Bacillus_cereus]                                         | CPTF_Cu         | 1384662.033 | 97821.89285 | 7.06467647  |
| UIJ65512.1 | malate_dehydrogenase_[Bacillus_cereus]                                         | CPTF_Fe         | 1838636.667 | 331021.1591 | 18.00362002 |
| UIJ65512.1 | malate_dehydrogenase_[Bacillus_cereus]                                         | CPTF_Mn         | 1867302.467 | 834674.5038 | 44.6994806  |
| UIJ65512.1 | malate_dehydrogenase_[Bacillus_cereus]                                         | CPTF_Ni         | 1291564.267 | 119836.5835 | 9.278406551 |
| UIJ65512.1 | malate_dehydrogenase_[Bacillus_cereus]                                         | CPTF_U          | 1021334.167 | 363764.4246 | 35.61659214 |
| UIJ65512.1 | malate_dehydrogenase_[Bacillus_cereus]                                         | CPTF_metals_mix | 3084902.4   | 183893.8666 | 5.961091883 |
| UIJ65512.1 | malate_dehydrogenase_[Bacillus_cereus]                                         | CPTF_zcontrol   | 1406685.367 | 136684.9975 | 9.716813774 |
| UIJ65513.1 | NADP-dependent_isocitrate_dehydrogenase_[Bacillus_cereus]                      | CPTF_Al         | 24669873.7  | 1409209.159 | 5.712267423 |
| UIJ65513.1 | NADP-dependent_isocitrate_dehydrogenase_[Bacillus_cereus]                      | CPTF_Cd         | 26194398.03 | 696427.4417 | 2.658688475 |
| UIJ65513.1 | NADP-dependent_isocitrate_dehydrogenase_[Bacillus_cereus]                      | CPTF_Co         | 23976865.7  | 1740776.282 | 7.260232857 |
| UIJ65513.1 | NADP-dependent_isocitrate_dehydrogenase_[Bacillus_cereus]                      | CPTF_Cu         | 23338453.5  | 256651.1141 | 1.099692034 |
| UIJ65513.1 | NADP-dependent_isocitrate_dehydrogenase_[Bacillus_cereus]                      | CPTF_Fe         | 24168477.93 | 214967.5259 | 0.889454133 |
| UIJ65513.1 | NADP-dependent_isocitrate_dehydrogenase_[Bacillus_cereus]                      | CPTF_Mn         | 24942123.63 | 1096951.106 | 4.397986002 |
| UIJ65513.1 | NADP-dependent_isocitrate_dehydrogenase_[Bacillus_cereus]                      | CPTF_Ni         | 21346918    | 1841796.817 | 8.627928475 |
| UIJ65513.1 | NADP-dependent_isocitrate_dehydrogenase_[Bacillus_cereus]                      | CPTF_U          | 21332034.97 | 4689910.415 | 21.98529312 |
| UIJ65513.1 | NADP-dependent_isocitrate_dehydrogenase_[Bacillus_cereus]                      | CPTF_metals_mix | 25332583.07 | 2259657.999 | 8.9199668   |
| UIJ65513.1 | NADP-dependent_isocitrate_dehydrogenase_[Bacillus_cereus]                      | CPTF_zcontrol   | 25465996    | 945823.8104 | 3.714065652 |
| UIJ65514.1 | citrate_synthase_[Bacillus_cereus]                                             | CPTF_Al         | 7198699     | 221246.1585 | 3.073418662 |
| UIJ65514.1 | citrate_synthase_[Bacillus_cereus]                                             | CPTF_Cd         | 7228439.133 | 849133.844  | 11.74712588 |
| UIJ65514.1 | citrate_synthase_[Bacillus_cereus]                                             | CPTF_Co         | 6636397     | 372604.042  | 5.614553228 |



|            |                                                                             |                 |             |             |             |
|------------|-----------------------------------------------------------------------------|-----------------|-------------|-------------|-------------|
| UIJ65514.1 | citrate_synthase [Bacillus_cereus]                                          | CPTF_Cu         | 7188977     | 433577.3539 | 6.031141202 |
| UIJ65514.1 | citrate_synthase [Bacillus_cereus]                                          | CPTF_Fe         | 7119240.667 | 346581.824  | 4.868241436 |
| UIJ65514.1 | citrate_synthase [Bacillus_cereus]                                          | CPTF_Mn         | 7171387.633 | 207206.7404 | 2.889353511 |
| UIJ65514.1 | citrate_synthase [Bacillus_cereus]                                          | CPTF_Ni         | 6968180.667 | 1002148.755 | 14.3817849  |
| UIJ65514.1 | citrate_synthase [Bacillus_cereus]                                          | CPTF_U          | 5769574.6   | 700239.4256 | 12.13676006 |
| UIJ65514.1 | citrate_synthase [Bacillus_cereus]                                          | CPTF_metals_mix | 7876439.267 | 944748.4935 | 11.99461408 |
| UIJ65514.1 | citrate_synthase [Bacillus_cereus]                                          | CPTF_zcontrol   | 7097112.267 | 484580.3541 | 6.827852455 |
| UIJ65518.1 | pyruvate_kinase [Bacillus_cereus]                                           | CPTF_Al         | 21750888.7  | 2522314.826 | 11.59637595 |
| UIJ65518.1 | pyruvate_kinase [Bacillus_cereus]                                           | CPTF_Cd         | 23672202.33 | 988214.6868 | 4.174578575 |
| UIJ65518.1 | pyruvate_kinase [Bacillus_cereus]                                           | CPTF_Co         | 22554029.67 | 1697227.038 | 7.525160973 |
| UIJ65518.1 | pyruvate_kinase [Bacillus_cereus]                                           | CPTF_Cu         | 21506696.07 | 310039.275  | 1.441594162 |
| UIJ65518.1 | pyruvate_kinase [Bacillus_cereus]                                           | CPTF_Fe         | 22100979.13 | 1354716.215 | 6.129666053 |
| UIJ65518.1 | pyruvate_kinase [Bacillus_cereus]                                           | CPTF_Mn         | 22471174.8  | 4631663.995 | 20.61157922 |
| UIJ65518.1 | pyruvate_kinase [Bacillus_cereus]                                           | CPTF_Ni         | 16892253.63 | 1500330.802 | 8.881768143 |
| UIJ65518.1 | pyruvate_kinase [Bacillus_cereus]                                           | CPTF_U          | 18230719.47 | 860529.1697 | 4.720215081 |
| UIJ65518.1 | pyruvate_kinase [Bacillus_cereus]                                           | CPTF_metals_mix | 40624510.4  | 2838568.654 | 6.987330126 |
| UIJ65518.1 | pyruvate_kinase [Bacillus_cereus]                                           | CPTF_zcontrol   | 19923163.2  | 1140209.06  | 5.723032272 |
| UIJ65519.1 | 6-phosphofructokinase [Bacillus_cereus]                                     | CPTF_Al         | 4582467.3   | 336426.2917 | 7.341597215 |
| UIJ65519.1 | 6-phosphofructokinase [Bacillus_cereus]                                     | CPTF_Cd         | 5003871.467 | 426511.5695 | 8.523631599 |
| UIJ65519.1 | 6-phosphofructokinase [Bacillus_cereus]                                     | CPTF_Co         | 4523176.667 | 419399.4019 | 9.272231283 |
| UIJ65519.1 | 6-phosphofructokinase [Bacillus_cereus]                                     | CPTF_Cu         | 4599243.3   | 268502.1182 | 5.837962914 |
| UIJ65519.1 | 6-phosphofructokinase [Bacillus_cereus]                                     | CPTF_Fe         | 4390605.633 | 251800.7283 | 5.734988503 |
| UIJ65519.1 | 6-phosphofructokinase [Bacillus_cereus]                                     | CPTF_Mn         | 4800220.633 | 1180531.124 | 24.59326799 |
| UIJ65519.1 | 6-phosphofructokinase [Bacillus_cereus]                                     | CPTF_Ni         | 4563591.4   | 467345.3318 | 10.24073566 |
| UIJ65519.1 | 6-phosphofructokinase [Bacillus_cereus]                                     | CPTF_U          | 4073090.333 | 265662.5864 | 6.522383857 |
| UIJ65519.1 | 6-phosphofructokinase [Bacillus_cereus]                                     | CPTF_metals_mix | 10467948.93 | 1547145.484 | 14.77983408 |
| UIJ65519.1 | 6-phosphofructokinase [Bacillus_cereus]                                     | CPTF_zcontrol   | 3785022.667 | 171856.2448 | 4.540428419 |
| UIJ65520.1 | acetyl-CoA_carboxylase_carboxyl_transferase_subunit_alpha [Bacillus_cereus] | CPTF_Al         | 890887.3333 | 304093.6801 | 34.1337977  |
| UIJ65520.1 | acetyl-CoA_carboxylase_carboxyl_transferase_subunit_alpha [Bacillus_cereus] | CPTF_Cd         | 489706.1667 | 54490.12375 | 11.1271059  |
| UIJ65520.1 | acetyl-CoA_carboxylase_carboxyl_transferase_subunit_alpha [Bacillus_cereus] | CPTF_Co         | 910217.4333 | 219763.6216 | 24.14407959 |
| UIJ65520.1 | acetyl-CoA_carboxylase_carboxyl_transferase_subunit_alpha [Bacillus_cereus] | CPTF_Cu         | 801044.2    | 297622.2293 | 37.15428304 |
| UIJ65520.1 | acetyl-CoA_carboxylase_carboxyl_transferase_subunit_alpha [Bacillus_cereus] | CPTF_Fe         | 805150.0667 | 95476.39536 | 11.8582112  |
| UIJ65520.1 | acetyl-CoA_carboxylase_carboxyl_transferase_subunit_alpha [Bacillus_cereus] | CPTF_Mn         | 610497.6333 | 110445.3704 | 18.09103989 |
| UIJ65520.1 | acetyl-CoA_carboxylase_carboxyl_transferase_subunit_alpha [Bacillus_cereus] | CPTF_Ni         | 731573.6667 | 248018.5425 | 33.90205987 |
| UIJ65520.1 | acetyl-CoA_carboxylase_carboxyl_transferase_subunit_alpha [Bacillus_cereus] | CPTF_U          | 606871.4333 | 100698.2983 | 16.59302    |
| UIJ65520.1 | acetyl-CoA_carboxylase_carboxyl_transferase_subunit_alpha [Bacillus_cereus] | CPTF_metals_mix | 581422.8667 | 232475.7926 | 39.98394386 |
| UIJ65520.1 | acetyl-CoA_carboxylase_carboxyl_transferase_subunit_alpha [Bacillus_cereus] | CPTF_zcontrol   | 615425.3333 | 189206.0927 | 30.74395583 |
| UIJ65521.1 | acetyl-CoA_carboxylase_carboxyltransferase_subunit_beta [Bacillus_cereus]   | CPTF_Al         | 68010       | 24319.33337 | 35.75846694 |
| UIJ65521.1 | acetyl-CoA_carboxylase_carboxyltransferase_subunit_beta [Bacillus_cereus]   | CPTF_Cd         | 42348.26667 | 28298.51738 | 66.82331914 |
| UIJ65521.1 | acetyl-CoA_carboxylase_carboxyltransferase_subunit_beta [Bacillus_cereus]   | CPTF_Co         | 404064.9667 | 624390.6416 | 154.5272897 |
| UIJ65521.1 | acetyl-CoA_carboxylase_carboxyltransferase_subunit_beta [Bacillus_cereus]   | CPTF_Cu         | 961508.4    | 111517.4543 | 11.59817785 |
| UIJ65521.1 | acetyl-CoA_carboxylase_carboxyltransferase_subunit_beta [Bacillus_cereus]   | CPTF_Fe         | 59145.3     | 32046.02733 | 54.18186623 |
| UIJ65521.1 | acetyl-CoA_carboxylase_carboxyltransferase_subunit_beta [Bacillus_cereus]   | CPTF_Mn         | 79619.46667 | 85759.54791 | 107.7117839 |
| UIJ65521.1 | acetyl-CoA_carboxylase_carboxyltransferase_subunit_beta [Bacillus_cereus]   | CPTF_Ni         | 597630.7    | 389254.1404 | 65.132889   |
| UIJ65521.1 | acetyl-CoA_carboxylase_carboxyltransferase_subunit_beta [Bacillus_cereus]   | CPTF_U          | 20584.6     | 35653.57305 | 173.2050808 |
| UIJ65521.1 | acetyl-CoA_carboxylase_carboxyltransferase_subunit_beta [Bacillus_cereus]   | CPTF_metals_mix | 1127488.3   | 610783.206  | 54.17202165 |
| UIJ65521.1 | acetyl-CoA_carboxylase_carboxyltransferase_subunit_beta [Bacillus_cereus]   | CPTF_zcontrol   | 14376.93333 | 24901.57899 | 173.2050808 |
| UIJ65522.1 | GntR_family_transcriptional_regulator [Bacillus_cereus]                     | CPTF_Al         | 96567.66667 | 167260.105  | 173.2050808 |
| UIJ65522.1 | GntR_family_transcriptional_regulator [Bacillus_cereus]                     | CPTF_Cd         | 0           | 0           | 0           |
| UIJ65522.1 | GntR_family_transcriptional_regulator [Bacillus_cereus]                     | CPTF_Co         | 95982.66667 | 166246.8553 | 173.2050808 |
| UIJ65522.1 | GntR_family_transcriptional_regulator [Bacillus_cereus]                     | CPTF_Cu         | 0           | 0           | 0           |
| UIJ65522.1 | GntR_family_transcriptional_regulator [Bacillus_cereus]                     | CPTF_Fe         | 0           | 0           | 0           |
| UIJ65522.1 | GntR_family_transcriptional_regulator [Bacillus_cereus]                     | CPTF_Mn         | 0           | 0           | 0           |
| UIJ65522.1 | GntR_family_transcriptional_regulator [Bacillus_cereus]                     | CPTF_Ni         | 92116.33333 | 159550.1695 | 173.2050808 |
| UIJ65522.1 | GntR_family_transcriptional_regulator [Bacillus_cereus]                     | CPTF_U          | 0           | 0           | 0           |
| UIJ65522.1 | GntR_family_transcriptional_regulator [Bacillus_cereus]                     | CPTF_metals_mix | 11731.66667 | 20319.84272 | 173.2050808 |
| UIJ65522.1 | GntR_family_transcriptional_regulator [Bacillus_cereus]                     | CPTF_zcontrol   | 0           | 0           | 0           |
| UIJ65526.1 | bifunctional_oligoribonuclease/PAP_phosphatase_NrnA [Bacillus_cereus]       | CPTF_Al         | 257439.9    | 55731.40477 | 21.64831666 |
| UIJ65526.1 | bifunctional_oligoribonuclease/PAP_phosphatase_NrnA [Bacillus_cereus]       | CPTF_Cd         | 381348.4667 | 166265.8478 | 43.59945361 |
| UIJ65526.1 | bifunctional_oligoribonuclease/PAP_phosphatase_NrnA [Bacillus_cereus]       | CPTF_Co         | 402189      | 111124.4991 | 27.62992005 |
| UIJ65526.1 | bifunctional_oligoribonuclease/PAP_phosphatase_NrnA [Bacillus_cereus]       | CPTF_Cu         | 410471.8    | 187857.739  | 45.76629601 |

|            |                                                                       |                 |             |             |             |
|------------|-----------------------------------------------------------------------|-----------------|-------------|-------------|-------------|
| UIJ65526.1 | bifunctional_oligoribonuclease/PAP_phosphatase_NrnA_[Bacillus_cereus] | CPTF_Fe         | 293627.5    | 128146.6157 | 43.64257969 |
| UIJ65526.1 | bifunctional_oligoribonuclease/PAP_phosphatase_NrnA_[Bacillus_cereus] | CPTF_Mn         | 215646      | 101710.2308 | 47.16536864 |
| UIJ65526.1 | bifunctional_oligoribonuclease/PAP_phosphatase_NrnA_[Bacillus_cereus] | CPTF_Ni         | 228788.4667 | 235167.6879 | 102.7882617 |
| UIJ65526.1 | bifunctional_oligoribonuclease/PAP_phosphatase_NrnA_[Bacillus_cereus] | CPTF_U          | 269377      | 47614.13168 | 17.67564851 |
| UIJ65526.1 | bifunctional_oligoribonuclease/PAP_phosphatase_NrnA_[Bacillus_cereus] | CPTF_metals_mix | 489533.9    | 130520.7791 | 26.66225549 |
| UIJ65526.1 | bifunctional_oligoribonuclease/PAP_phosphatase_NrnA_[Bacillus_cereus] | CPTF_zcontrol   | 195227      | 7408.957889 | 3.795047759 |
| UIJ65529.1 | CBS_domain-containing_protein_[Bacillus_cereus]                       | CPTF_AI         | 94046.3     | 31542.72783 | 33.53957342 |
| UIJ65529.1 | CBS_domain-containing_protein_[Bacillus_cereus]                       | CPTF_Cd         | 101051.1    | 41953.38129 | 41.51699615 |
| UIJ65529.1 | CBS_domain-containing_protein_[Bacillus_cereus]                       | CPTF_Co         | 105037.5333 | 11982.34542 | 11.40767975 |
| UIJ65529.1 | CBS_domain-containing_protein_[Bacillus_cereus]                       | CPTF_Cu         | 224062.9    | 164188.1525 | 73.27770573 |
| UIJ65529.1 | CBS_domain-containing_protein_[Bacillus_cereus]                       | CPTF_Fe         | 107291      | 17455.23139 | 16.26905462 |
| UIJ65529.1 | CBS_domain-containing_protein_[Bacillus_cereus]                       | CPTF_Mn         | 178915      | 206977.2793 | 115.684699  |
| UIJ65529.1 | CBS_domain-containing_protein_[Bacillus_cereus]                       | CPTF_Ni         | 156029.3333 | 145621.1136 | 93.32931861 |
| UIJ65529.1 | CBS_domain-containing_protein_[Bacillus_cereus]                       | CPTF_U          | 147940.8333 | 167047.3936 | 112.9150011 |
| UIJ65529.1 | CBS_domain-containing_protein_[Bacillus_cereus]                       | CPTF_metals_mix | 37130.66667 | 64312.20119 | 173.2050808 |
| UIJ65529.1 | CBS_domain-containing_protein_[Bacillus_cereus]                       | CPTF_zcontrol   | 274649.1    | 162077.6982 | 59.01264493 |
| UIJ65531.1 | metal-dependent_hydrolase_[Bacillus_cereus]                           | CPTF_AI         | 31499.93333 | 27960.56388 | 88.76388273 |
| UIJ65531.1 | metal-dependent_hydrolase_[Bacillus_cereus]                           | CPTF_Cd         | 41749.33333 | 18569.58686 | 44.47876261 |
| UIJ65531.1 | metal-dependent_hydrolase_[Bacillus_cereus]                           | CPTF_Co         | 6709.233333 | 11620.73301 | 173.2050808 |
| UIJ65531.1 | metal-dependent_hydrolase_[Bacillus_cereus]                           | CPTF_Cu         | 21503.06667 | 21565.11551 | 100.2885581 |
| UIJ65531.1 | metal-dependent_hydrolase_[Bacillus_cereus]                           | CPTF_Fe         | 21827.76667 | 16794.75521 | 76.94216026 |
| UIJ65531.1 | metal-dependent_hydrolase_[Bacillus_cereus]                           | CPTF_Mn         | 30600.56667 | 35916.26159 | 117.3712304 |
| UIJ65531.1 | metal-dependent_hydrolase_[Bacillus_cereus]                           | CPTF_Ni         | 0           | 0           | 0           |
| UIJ65531.1 | metal-dependent_hydrolase_[Bacillus_cereus]                           | CPTF_U          | 0           | 0           | 0           |
| UIJ65531.1 | metal-dependent_hydrolase_[Bacillus_cereus]                           | CPTF_metals_mix | 47364.23333 | 23086.65476 | 48.7428026  |
| UIJ65531.1 | metal-dependent_hydrolase_[Bacillus_cereus]                           | CPTF_zcontrol   | 11714.4     | 20289.93598 | 173.2050808 |
| UIJ65532.1 | Xaa-Pro_dipeptidase_[Bacillus_cereus]                                 | CPTF_AI         | 3633556.867 | 400938.2076 | 11.03431768 |
| UIJ65532.1 | Xaa-Pro_dipeptidase_[Bacillus_cereus]                                 | CPTF_Cd         | 3946635.433 | 136007.8424 | 3.446171927 |
| UIJ65532.1 | Xaa-Pro_dipeptidase_[Bacillus_cereus]                                 | CPTF_Co         | 3288928.567 | 556335.4103 | 16.91539962 |
| UIJ65532.1 | Xaa-Pro_dipeptidase_[Bacillus_cereus]                                 | CPTF_Cu         | 3662686.133 | 145519.0003 | 3.97301311  |
| UIJ65532.1 | Xaa-Pro_dipeptidase_[Bacillus_cereus]                                 | CPTF_Fe         | 3368772.267 | 65675.39928 | 1.949535145 |
| UIJ65532.1 | Xaa-Pro_dipeptidase_[Bacillus_cereus]                                 | CPTF_Mn         | 3716473.867 | 1191925.818 | 32.07141664 |
| UIJ65532.1 | Xaa-Pro_dipeptidase_[Bacillus_cereus]                                 | CPTF_Ni         | 2530331.733 | 155280.3537 | 6.136758738 |
| UIJ65532.1 | Xaa-Pro_dipeptidase_[Bacillus_cereus]                                 | CPTF_U          | 3337039.267 | 543728.0451 | 16.29372631 |
| UIJ65532.1 | Xaa-Pro_dipeptidase_[Bacillus_cereus]                                 | CPTF_metals_mix | 5962836.833 | 448507.0342 | 7.521705636 |
| UIJ65532.1 | Xaa-Pro_dipeptidase_[Bacillus_cereus]                                 | CPTF_zcontrol   | 3182392.633 | 524091.18   | 16.46846384 |
| UIJ65540.1 | alanine_dehydrogenase_[Bacillus_cereus]                               | CPTF_AI         | 1810224.8   | 136299.2196 | 7.529408479 |
| UIJ65540.1 | alanine_dehydrogenase_[Bacillus_cereus]                               | CPTF_Cd         | 1879126.933 | 148631.8728 | 7.909623889 |
| UIJ65540.1 | alanine_dehydrogenase_[Bacillus_cereus]                               | CPTF_Co         | 1649910.467 | 130692.4592 | 7.921184927 |
| UIJ65540.1 | alanine_dehydrogenase_[Bacillus_cereus]                               | CPTF_Cu         | 1678860.633 | 68068.29966 | 4.054434198 |
| UIJ65540.1 | alanine_dehydrogenase_[Bacillus_cereus]                               | CPTF_Fe         | 1607551.7   | 166168.1031 | 10.33671907 |
| UIJ65540.1 | alanine_dehydrogenase_[Bacillus_cereus]                               | CPTF_Mn         | 1938612.633 | 462489.6022 | 23.85673106 |
| UIJ65540.1 | alanine_dehydrogenase_[Bacillus_cereus]                               | CPTF_Ni         | 1736625.067 | 361725.3603 | 20.8292145  |
| UIJ65540.1 | alanine_dehydrogenase_[Bacillus_cereus]                               | CPTF_U          | 2070903     | 1069769.259 | 51.65713988 |
| UIJ65540.1 | alanine_dehydrogenase_[Bacillus_cereus]                               | CPTF_metals_mix | 5949043.133 | 925986.6222 | 15.56530355 |
| UIJ65540.1 | alanine_dehydrogenase_[Bacillus_cereus]                               | CPTF_zcontrol   | 1500337.333 | 226066.1128 | 15.06768563 |
| UIJ65541.1 | universal_stress_protein_[Bacillus_cereus]                            | CPTF_AI         | 10818435.6  | 3513871.667 | 32.48040472 |
| UIJ65541.1 | universal_stress_protein_[Bacillus_cereus]                            | CPTF_Cd         | 19134570.67 | 2975747.469 | 15.55168141 |
| UIJ65541.1 | universal_stress_protein_[Bacillus_cereus]                            | CPTF_Co         | 9169707.867 | 3895534.474 | 42.48264537 |
| UIJ65541.1 | universal_stress_protein_[Bacillus_cereus]                            | CPTF_Cu         | 8754616.333 | 1534511.653 | 17.52802858 |
| UIJ65541.1 | universal_stress_protein_[Bacillus_cereus]                            | CPTF_Fe         | 11990262.07 | 4682567.701 | 39.05308887 |
| UIJ65541.1 | universal_stress_protein_[Bacillus_cereus]                            | CPTF_Mn         | 14459024.8  | 11964224.22 | 82.74572029 |
| UIJ65541.1 | universal_stress_protein_[Bacillus_cereus]                            | CPTF_Ni         | 3465831.433 | 1199887.208 | 34.62047222 |
| UIJ65541.1 | universal_stress_protein_[Bacillus_cereus]                            | CPTF_U          | 3471222.503 | 1276811.418 | 36.78275931 |
| UIJ65541.1 | universal_stress_protein_[Bacillus_cereus]                            | CPTF_metals_mix | 44198973.63 | 2700573.134 | 6.110035849 |
| UIJ65541.1 | universal_stress_protein_[Bacillus_cereus]                            | CPTF_zcontrol   | 7619857.333 | 2483806.02  | 32.59648981 |
| UIJ65545.1 | argininosuccinate_lyase_[Bacillus_cereus]                             | CPTF_AI         | 4314462.533 | 597772.2572 | 13.8550805  |
| UIJ65545.1 | argininosuccinate_lyase_[Bacillus_cereus]                             | CPTF_Cd         | 3723043.8   | 225085.5141 | 6.045739082 |
| UIJ65545.1 | argininosuccinate_lyase_[Bacillus_cereus]                             | CPTF_Co         | 3706926.067 | 493374.8264 | 13.30954051 |
| UIJ65545.1 | argininosuccinate_lyase_[Bacillus_cereus]                             | CPTF_Cu         | 4373267.467 | 788607.9115 | 18.03246468 |
| UIJ65545.1 | argininosuccinate_lyase_[Bacillus_cereus]                             | CPTF_Fe         | 3794338.467 | 441869.9194 | 11.64550615 |

|            |                                              |                 |             |             |             |
|------------|----------------------------------------------|-----------------|-------------|-------------|-------------|
| UIJ65545.1 | argininosuccinate_lyase_[Bacillus_cereus]    | CPTF_Mn         | 3830276.667 | 1267583.122 | 33.09377448 |
| UIJ65545.1 | argininosuccinate_lyase_[Bacillus_cereus]    | CPTF_Ni         | 3570668.933 | 244232.8605 | 6.839974948 |
| UIJ65545.1 | argininosuccinate_lyase_[Bacillus_cereus]    | CPTF_U          | 3799171.067 | 747791.7932 | 19.68302506 |
| UIJ65545.1 | argininosuccinate_lyase_[Bacillus_cereus]    | CPTF_metals_mix | 4213585.767 | 556502.2037 | 13.20733063 |
| UIJ65545.1 | argininosuccinate_lyase_[Bacillus_cereus]    | CPTF_zcontrol   | 4422377.867 | 901362.982  | 20.38186264 |
| UIJ65546.1 | argininosuccinate_synthase_[Bacillus_cereus] | CPTF_Al         | 6098531.267 | 439159.7014 | 7.201073213 |
| UIJ65546.1 | argininosuccinate_synthase_[Bacillus_cereus] | CPTF_Cd         | 6268593.267 | 451047.5733 | 7.195355547 |
| UIJ65546.1 | argininosuccinate_synthase_[Bacillus_cereus] | CPTF_Co         | 6589863.933 | 902912.0854 | 13.70152851 |
| UIJ65546.1 | argininosuccinate_synthase_[Bacillus_cereus] | CPTF_Cu         | 6882738.633 | 493454.7991 | 7.169454274 |
| UIJ65546.1 | argininosuccinate_synthase_[Bacillus_cereus] | CPTF_Fe         | 6033359.067 | 338586.8123 | 5.611912179 |
| UIJ65546.1 | argininosuccinate_synthase_[Bacillus_cereus] | CPTF_Mn         | 6342948.1   | 728385.1491 | 11.48338498 |
| UIJ65546.1 | argininosuccinate_synthase_[Bacillus_cereus] | CPTF_Ni         | 6209075.5   | 696967.7163 | 11.22498376 |
| UIJ65546.1 | argininosuccinate_synthase_[Bacillus_cereus] | CPTF_U          | 4995463.8   | 335149.9861 | 6.709086474 |
| UIJ65546.1 | argininosuccinate_synthase_[Bacillus_cereus] | CPTF_metals_mix | 8240924.2   | 711655.7953 | 8.635630883 |
| UIJ65546.1 | argininosuccinate_synthase_[Bacillus_cereus] | CPTF_zcontrol   | 6419328.6   | 289315.9638 | 4.506950522 |
| UIJ65549.1 | EcsC_family_protein_[Bacillus_cereus]        | CPTF_Al         | 270319      | 235840.8843 | 87.24539686 |
| UIJ65549.1 | EcsC_family_protein_[Bacillus_cereus]        | CPTF_Cd         | 171534.3333 | 149626.2646 | 87.22817276 |
| UIJ65549.1 | EcsC_family_protein_[Bacillus_cereus]        | CPTF_Co         | 131911.3333 | 228477.1314 | 173.2050808 |
| UIJ65549.1 | EcsC_family_protein_[Bacillus_cereus]        | CPTF_Cu         | 417030.6667 | 91123.77196 | 21.85061657 |
| UIJ65549.1 | EcsC_family_protein_[Bacillus_cereus]        | CPTF_Fe         | 214842      | 56258.12056 | 26.18581123 |
| UIJ65549.1 | EcsC_family_protein_[Bacillus_cereus]        | CPTF_Mn         | 266744      | 258785.807  | 97.01654282 |
| UIJ65549.1 | EcsC_family_protein_[Bacillus_cereus]        | CPTF_Ni         | 645701      | 168178.6678 | 26.04590481 |
| UIJ65549.1 | EcsC_family_protein_[Bacillus_cereus]        | CPTF_U          | 382758.6667 | 336038.0121 | 87.79370432 |
| UIJ65549.1 | EcsC_family_protein_[Bacillus_cereus]        | CPTF_metals_mix | 326620.3667 | 256122.0579 | 78.41582583 |
| UIJ65549.1 | EcsC_family_protein_[Bacillus_cereus]        | CPTF_zcontrol   | 174667.3333 | 151926.3549 | 86.98040556 |
| UIJ65552.1 | acetate_kinase_[Bacillus_cereus]             | CPTF_Al         | 4932416.033 | 547640.3329 | 11.10288202 |
| UIJ65552.1 | acetate_kinase_[Bacillus_cereus]             | CPTF_Cd         | 5396190.8   | 559564.7457 | 10.36962492 |
| UIJ65552.1 | acetate_kinase_[Bacillus_cereus]             | CPTF_Co         | 4487397.267 | 409427.595  | 9.123943585 |
| UIJ65552.1 | acetate_kinase_[Bacillus_cereus]             | CPTF_Cu         | 4783559.187 | 185959.3845 | 3.887469084 |
| UIJ65552.1 | acetate_kinase_[Bacillus_cereus]             | CPTF_Fe         | 4993037.3   | 419936.781  | 8.410447504 |
| UIJ65552.1 | acetate_kinase_[Bacillus_cereus]             | CPTF_Mn         | 4758927.3   | 559544.0919 | 11.75777668 |
| UIJ65552.1 | acetate_kinase_[Bacillus_cereus]             | CPTF_Ni         | 2426345.4   | 634992.882  | 26.17075384 |
| UIJ65552.1 | acetate_kinase_[Bacillus_cereus]             | CPTF_U          | 3527680.333 | 269782.0421 | 7.647576215 |
| UIJ65552.1 | acetate_kinase_[Bacillus_cereus]             | CPTF_metals_mix | 6451670.1   | 808550.8482 | 12.53242704 |
| UIJ65552.1 | acetate_kinase_[Bacillus_cereus]             | CPTF_zcontrol   | 4623293.833 | 554976.9818 | 12.00393057 |
| UIJ65554.1 | thiol_peroxidase_[Bacillus_cereus]           | CPTF_Al         | 3595371.567 | 1111337.445 | 30.91022511 |
| UIJ65554.1 | thiol_peroxidase_[Bacillus_cereus]           | CPTF_Cd         | 5874150.067 | 523161.161  | 8.906159276 |
| UIJ65554.1 | thiol_peroxidase_[Bacillus_cereus]           | CPTF_Co         | 3125439.967 | 916155.4857 | 29.31284861 |
| UIJ65554.1 | thiol_peroxidase_[Bacillus_cereus]           | CPTF_Cu         | 2804817.267 | 391930.775  | 13.97348696 |
| UIJ65554.1 | thiol_peroxidase_[Bacillus_cereus]           | CPTF_Fe         | 3838040.8   | 1333286.15  | 34.73871747 |
| UIJ65554.1 | thiol_peroxidase_[Bacillus_cereus]           | CPTF_Mn         | 4710625.6   | 3211256.227 | 68.17048306 |
| UIJ65554.1 | thiol_peroxidase_[Bacillus_cereus]           | CPTF_Ni         | 1156076.1   | 353788.3625 | 30.60251505 |
| UIJ65554.1 | thiol_peroxidase_[Bacillus_cereus]           | CPTF_U          | 1564672.333 | 892784.0255 | 57.05884909 |
| UIJ65554.1 | thiol_peroxidase_[Bacillus_cereus]           | CPTF_metals_mix | 10291251.2  | 954179.5475 | 9.271754513 |
| UIJ65554.1 | thiol_peroxidase_[Bacillus_cereus]           | CPTF_zcontrol   | 3216674.767 | 1154471.06  | 35.89020166 |
| UIJ65557.1 | NAD_kinase_[Bacillus_cereus]                 | CPTF_Al         | 2084720.267 | 45348.90938 | 2.175299492 |
| UIJ65557.1 | NAD_kinase_[Bacillus_cereus]                 | CPTF_Cd         | 2286746.7   | 82591.15844 | 3.61173183  |
| UIJ65557.1 | NAD_kinase_[Bacillus_cereus]                 | CPTF_Co         | 1970841.933 | 105780.0997 | 5.367254368 |
| UIJ65557.1 | NAD_kinase_[Bacillus_cereus]                 | CPTF_Cu         | 2174319.767 | 164639.33   | 7.571992516 |
| UIJ65557.1 | NAD_kinase_[Bacillus_cereus]                 | CPTF_Fe         | 2205926.733 | 104456.4637 | 4.735264419 |
| UIJ65557.1 | NAD_kinase_[Bacillus_cereus]                 | CPTF_Mn         | 1974611.567 | 356136.0205 | 18.03575075 |
| UIJ65557.1 | NAD_kinase_[Bacillus_cereus]                 | CPTF_Ni         | 1867194     | 82356.42945 | 4.410705553 |
| UIJ65557.1 | NAD_kinase_[Bacillus_cereus]                 | CPTF_U          | 2130444.967 | 113487.1465 | 5.32692223  |
| UIJ65557.1 | NAD_kinase_[Bacillus_cereus]                 | CPTF_metals_mix | 2008011.267 | 133183.3112 | 6.632597805 |
| UIJ65557.1 | NAD_kinase_[Bacillus_cereus]                 | CPTF_zcontrol   | 2019869.1   | 20856.90709 | 1.032587067 |
| UIJ65559.1 | VOC_family_protein_[Bacillus_cereus]         | CPTF_Al         | 0           | 0           | 0           |
| UIJ65559.1 | VOC_family_protein_[Bacillus_cereus]         | CPTF_Cd         | 0           | 0           | 0           |
| UIJ65559.1 | VOC_family_protein_[Bacillus_cereus]         | CPTF_Co         | 0           | 0           | 0           |
| UIJ65559.1 | VOC_family_protein_[Bacillus_cereus]         | CPTF_Cu         | 0           | 0           | 0           |
| UIJ65559.1 | VOC_family_protein_[Bacillus_cereus]         | CPTF_Fe         | 0           | 0           | 0           |
| UIJ65559.1 | VOC_family_protein_[Bacillus_cereus]         | CPTF_Mn         | 37876.33333 | 65603.73374 | 173.2050808 |

|            |                                                                      |                 |             |             |             |
|------------|----------------------------------------------------------------------|-----------------|-------------|-------------|-------------|
| UIJ65559.1 | VOC_family_protein [Bacillus cereus]                                 | CPTF_Ni         | 0           | 0           | 0           |
| UIJ65559.1 | VOC_family_protein [Bacillus cereus]                                 | CPTF_U          | 0           | 0           | 0           |
| UIJ65559.1 | VOC_family_protein [Bacillus cereus]                                 | CPTF_metals_mix | 138794.6667 | 33722.1309  | 24.29641694 |
| UIJ65559.1 | VOC_family_protein [Bacillus cereus]                                 | CPTF_zcontrol   | 0           | 0           | 0           |
| UIJ65563.1 | cysteine_desulfurase [Bacillus cereus]                               | CPTF_Al         | 0           | 0           | 0           |
| UIJ65563.1 | cysteine_desulfurase [Bacillus cereus]                               | CPTF_Cd         | 0           | 0           | 0           |
| UIJ65563.1 | cysteine_desulfurase [Bacillus cereus]                               | CPTF_Co         | 0           | 0           | 0           |
| UIJ65563.1 | cysteine_desulfurase [Bacillus cereus]                               | CPTF_Cu         | 0           | 0           | 0           |
| UIJ65563.1 | cysteine_desulfurase [Bacillus cereus]                               | CPTF_Fe         | 0           | 0           | 0           |
| UIJ65563.1 | cysteine_desulfurase [Bacillus cereus]                               | CPTF_Mn         | 59603.3333  | 103236.0016 | 173.2050808 |
| UIJ65563.1 | cysteine_desulfurase [Bacillus cereus]                               | CPTF_Ni         | 0           | 0           | 0           |
| UIJ65563.1 | cysteine_desulfurase [Bacillus cereus]                               | CPTF_U          | 0           | 0           | 0           |
| UIJ65563.1 | cysteine_desulfurase [Bacillus cereus]                               | CPTF_metals_mix | 107218      | 95344.3257  | 88.92567079 |
| UIJ65563.1 | cysteine_desulfurase [Bacillus cereus]                               | CPTF_zcontrol   | 0           | 0           | 0           |
| UIJ65564.1 | septation_ring_formation_regulator_EzrA [Bacillus cereus]            | CPTF_Al         | 208890.7667 | 112051.439  | 53.64116411 |
| UIJ65564.1 | septation_ring_formation_regulator_EzrA [Bacillus cereus]            | CPTF_Cd         | 279827.0667 | 250952.3608 | 89.681232   |
| UIJ65564.1 | septation_ring_formation_regulator_EzrA [Bacillus cereus]            | CPTF_Co         | 219747.7667 | 149440.8297 | 68.00561933 |
| UIJ65564.1 | septation_ring_formation_regulator_EzrA [Bacillus cereus]            | CPTF_Cu         | 223498.6667 | 156891.1976 | 70.19782261 |
| UIJ65564.1 | septation_ring_formation_regulator_EzrA [Bacillus cereus]            | CPTF_Fe         | 210731.4667 | 121426.8097 | 57.62158427 |
| UIJ65564.1 | septation_ring_formation_regulator_EzrA [Bacillus cereus]            | CPTF_Mn         | 74709.1333  | 9331.924625 | 12.49100908 |
| UIJ65564.1 | septation_ring_formation_regulator_EzrA [Bacillus cereus]            | CPTF_Ni         | 186557.7667 | 126222.5226 | 67.65868012 |
| UIJ65564.1 | septation_ring_formation_regulator_EzrA [Bacillus cereus]            | CPTF_U          | 207740.7667 | 113309.024  | 54.54347059 |
| UIJ65564.1 | septation_ring_formation_regulator_EzrA [Bacillus cereus]            | CPTF_metals_mix | 305117.9667 | 185531.0379 | 60.80633006 |
| UIJ65564.1 | septation_ring_formation_regulator_EzrA [Bacillus cereus]            | CPTF_zcontrol   | 114334.1667 | 141952.5395 | 124.1558352 |
| UIJ65570.1 | 30S_ribosomal_protein_S4 [Bacillus cereus]                           | CPTF_Al         | 29169147.2  | 1493859.95  | 5.121369988 |
| UIJ65570.1 | 30S_ribosomal_protein_S4 [Bacillus cereus]                           | CPTF_Cd         | 31509823.53 | 1653692.039 | 5.248179309 |
| UIJ65570.1 | 30S_ribosomal_protein_S4 [Bacillus cereus]                           | CPTF_Co         | 31400028.13 | 43694.39602 | 0.139154003 |
| UIJ65570.1 | 30S_ribosomal_protein_S4 [Bacillus cereus]                           | CPTF_Cu         | 27995163.7  | 1743263.667 | 6.22701723  |
| UIJ65570.1 | 30S_ribosomal_protein_S4 [Bacillus cereus]                           | CPTF_Fe         | 30289500.97 | 2414833.645 | 7.972510502 |
| UIJ65570.1 | 30S_ribosomal_protein_S4 [Bacillus cereus]                           | CPTF_Mn         | 31102267.57 | 4049064.223 | 13.0185499  |
| UIJ65570.1 | 30S_ribosomal_protein_S4 [Bacillus cereus]                           | CPTF_Ni         | 26109719.83 | 753778.881  | 2.886966562 |
| UIJ65570.1 | 30S_ribosomal_protein_S4 [Bacillus cereus]                           | CPTF_U          | 24917814.33 | 2279483.928 | 9.148009122 |
| UIJ65570.1 | 30S_ribosomal_protein_S4 [Bacillus cereus]                           | CPTF_metals_mix | 30752937    | 1537326.649 | 4.998958795 |
| UIJ65570.1 | 30S_ribosomal_protein_S4 [Bacillus cereus]                           | CPTF_zcontrol   | 28860709.93 | 1562152.373 | 5.412730237 |
| UIJ65575.1 | tyrosine--tRNA_ligase [Bacillus cereus]                              | CPTF_Al         | 3233078.667 | 315713.3893 | 9.765100756 |
| UIJ65575.1 | tyrosine--tRNA_ligase [Bacillus cereus]                              | CPTF_Cd         | 3432988.333 | 84624.13346 | 2.465028286 |
| UIJ65575.1 | tyrosine--tRNA_ligase [Bacillus cereus]                              | CPTF_Co         | 3536844.867 | 273767.0136 | 7.740430354 |
| UIJ65575.1 | tyrosine--tRNA_ligase [Bacillus cereus]                              | CPTF_Cu         | 3383854.967 | 215987.2868 | 6.382876597 |
| UIJ65575.1 | tyrosine--tRNA_ligase [Bacillus cereus]                              | CPTF_Fe         | 3115961     | 290890.4574 | 9.335497376 |
| UIJ65575.1 | tyrosine--tRNA_ligase [Bacillus cereus]                              | CPTF_Mn         | 3337113.067 | 330069.7139 | 9.890875954 |
| UIJ65575.1 | tyrosine--tRNA_ligase [Bacillus cereus]                              | CPTF_Ni         | 2923926.667 | 71648.19427 | 2.450410097 |
| UIJ65575.1 | tyrosine--tRNA_ligase [Bacillus cereus]                              | CPTF_U          | 3753913.533 | 39099.77037 | 1.041573548 |
| UIJ65575.1 | tyrosine--tRNA_ligase [Bacillus cereus]                              | CPTF_metals_mix | 3262239.2   | 209274.6271 | 6.415060768 |
| UIJ65575.1 | tyrosine--tRNA_ligase [Bacillus cereus]                              | CPTF_zcontrol   | 3139217.933 | 421219.9724 | 13.41799076 |
| UIJ65576.1 | acetate--CoA_ligase [Bacillus cereus]                                | CPTF_Al         | 8447313.1   | 236323.3703 | 2.797615851 |
| UIJ65576.1 | acetate--CoA_ligase [Bacillus cereus]                                | CPTF_Cd         | 10003761.73 | 689381.3223 | 6.891220929 |
| UIJ65576.1 | acetate--CoA_ligase [Bacillus cereus]                                | CPTF_Co         | 7645226.533 | 218799.397  | 2.861908617 |
| UIJ65576.1 | acetate--CoA_ligase [Bacillus cereus]                                | CPTF_Cu         | 5503015     | 169037.8858 | 3.071732237 |
| UIJ65576.1 | acetate--CoA_ligase [Bacillus cereus]                                | CPTF_Fe         | 9040551.967 | 619632.478  | 6.853923082 |
| UIJ65576.1 | acetate--CoA_ligase [Bacillus cereus]                                | CPTF_Mn         | 8428907.133 | 415032.9873 | 4.923924071 |
| UIJ65576.1 | acetate--CoA_ligase [Bacillus cereus]                                | CPTF_Ni         | 6418644.5   | 72227.77936 | 1.125280881 |
| UIJ65576.1 | acetate--CoA_ligase [Bacillus cereus]                                | CPTF_U          | 6755440.967 | 1648285.289 | 24.39937374 |
| UIJ65576.1 | acetate--CoA_ligase [Bacillus cereus]                                | CPTF_metals_mix | 4389606     | 746910.6574 | 17.01543732 |
| UIJ65576.1 | acetate--CoA_ligase [Bacillus cereus]                                | CPTF_zcontrol   | 7974049.9   | 823163.5124 | 10.32302936 |
| UIJ65577.1 | acetoin_utilization_protein_acetyltransferase_AcuA [Bacillus cereus] | CPTF_Al         | 217166.7    | 44977.13525 | 20.71088028 |
| UIJ65577.1 | acetoin_utilization_protein_acetyltransferase_AcuA [Bacillus cereus] | CPTF_Cd         | 107036.3    | 135319.8108 | 126.4242232 |
| UIJ65577.1 | acetoin_utilization_protein_acetyltransferase_AcuA [Bacillus cereus] | CPTF_Co         | 264162.9667 | 59118.34562 | 22.37949792 |
| UIJ65577.1 | acetoin_utilization_protein_acetyltransferase_AcuA [Bacillus cereus] | CPTF_Cu         | 235886.6667 | 11643.54934 | 4.936077782 |
| UIJ65577.1 | acetoin_utilization_protein_acetyltransferase_AcuA [Bacillus cereus] | CPTF_Fe         | 209275.3333 | 43999.39611 | 21.0246451  |
| UIJ65577.1 | acetoin_utilization_protein_acetyltransferase_AcuA [Bacillus cereus] | CPTF_Mn         | 120070.9    | 43121.53378 | 35.91339265 |
| UIJ65577.1 | acetoin_utilization_protein_acetyltransferase_AcuA [Bacillus cereus] | CPTF_Ni         | 201277.6    | 42507.06756 | 21.11862798 |

|            |                                                                      |                 |             |             |             |
|------------|----------------------------------------------------------------------|-----------------|-------------|-------------|-------------|
| UIJ65577.1 | acetoin_utilization_protein_acetyltransferase_AcuA_[Bacillus_cereus] | CPTF_U          | 163442.1333 | 84998.03849 | 52.00497372 |
| UIJ65577.1 | acetoin_utilization_protein_acetyltransferase_AcuA_[Bacillus_cereus] | CPTF_metals_mix | 108967.2333 | 97882.95916 | 89.82788326 |
| UIJ65577.1 | acetoin_utilization_protein_acetyltransferase_AcuA_[Bacillus_cereus] | CPTF_zcontrol   | 76466.96667 | 100227.9166 | 131.073483  |
| UIJ65578.1 | acetoin_utilization_AcuB_family_protein_[Bacillus_cereus]            | CPTF_Al         | 377714.2    | 360141.0664 | 95.34750517 |
| UIJ65578.1 | acetoin_utilization_AcuB_family_protein_[Bacillus_cereus]            | CPTF_Cd         | 30689.9     | 26578.25297 | 86.60260532 |
| UIJ65578.1 | acetoin_utilization_AcuB_family_protein_[Bacillus_cereus]            | CPTF_Co         | 76502.63333 | 71020.34942 | 92.83386248 |
| UIJ65578.1 | acetoin_utilization_AcuB_family_protein_[Bacillus_cereus]            | CPTF_Cu         | 0           | 0           | 0           |
| UIJ65578.1 | acetoin_utilization_AcuB_family_protein_[Bacillus_cereus]            | CPTF_Fe         | 239433.4667 | 345792.3513 | 144.4210603 |
| UIJ65578.1 | acetoin_utilization_AcuB_family_protein_[Bacillus_cereus]            | CPTF_Mn         | 261629.6667 | 453155.8754 | 173.2050808 |
| UIJ65578.1 | acetoin_utilization_AcuB_family_protein_[Bacillus_cereus]            | CPTF_Ni         | 0           | 0           | 0           |
| UIJ65578.1 | acetoin_utilization_AcuB_family_protein_[Bacillus_cereus]            | CPTF_U          | 648639.6667 | 50346.42948 | 7.761848691 |
| UIJ65578.1 | acetoin_utilization_AcuB_family_protein_[Bacillus_cereus]            | CPTF_metals_mix | 496316.6333 | 51546.53659 | 10.38581686 |
| UIJ65578.1 | acetoin_utilization_AcuB_family_protein_[Bacillus_cereus]            | CPTF_zcontrol   | 20148       | 348866.2096 | 173.2050808 |
| UIJ65579.1 | acetoin_utilization_protein_AcuC_[Bacillus_cereus]                   | CPTF_Al         | 629351.3333 | 139313.5254 | 22.13604994 |
| UIJ65579.1 | acetoin_utilization_protein_AcuC_[Bacillus_cereus]                   | CPTF_Cd         | 653656.2667 | 170646.0411 | 26.10638799 |
| UIJ65579.1 | acetoin_utilization_protein_AcuC_[Bacillus_cereus]                   | CPTF_Co         | 512202.2333 | 141930.8886 | 27.70993162 |
| UIJ65579.1 | acetoin_utilization_protein_AcuC_[Bacillus_cereus]                   | CPTF_Cu         | 494001.9333 | 107855.6075 | 21.83303348 |
| UIJ65579.1 | acetoin_utilization_protein_AcuC_[Bacillus_cereus]                   | CPTF_Fe         | 654829.7333 | 263835.1436 | 40.29064811 |
| UIJ65579.1 | acetoin_utilization_protein_AcuC_[Bacillus_cereus]                   | CPTF_Mn         | 492626.1333 | 298680.2363 | 60.63020535 |
| UIJ65579.1 | acetoin_utilization_protein_AcuC_[Bacillus_cereus]                   | CPTF_Ni         | 751222.4333 | 158590.6773 | 21.11101456 |
| UIJ65579.1 | acetoin_utilization_protein_AcuC_[Bacillus_cereus]                   | CPTF_U          | 475398.5667 | 186178.6228 | 39.16263865 |
| UIJ65579.1 | acetoin_utilization_protein_AcuC_[Bacillus_cereus]                   | CPTF_metals_mix | 223739.9333 | 62377.71727 | 27.87956371 |
| UIJ65579.1 | acetoin_utilization_protein_AcuC_[Bacillus_cereus]                   | CPTF_zcontrol   | 409586.6333 | 16885.43883 | 4.122556122 |
| UIJ65584.1 | Gfo/Idh/MocA_family_oxidoreductase_[Bacillus_cereus]                 | CPTF_Al         | 0           | 0           | 0           |
| UIJ65584.1 | Gfo/Idh/MocA_family_oxidoreductase_[Bacillus_cereus]                 | CPTF_Cd         | 19462.1     | 18209.57133 | 93.56428714 |
| UIJ65584.1 | Gfo/Idh/MocA_family_oxidoreductase_[Bacillus_cereus]                 | CPTF_Co         | 0           | 0           | 0           |
| UIJ65584.1 | Gfo/Idh/MocA_family_oxidoreductase_[Bacillus_cereus]                 | CPTF_Cu         | 0           | 0           | 0           |
| UIJ65584.1 | Gfo/Idh/MocA_family_oxidoreductase_[Bacillus_cereus]                 | CPTF_Fe         | 0           | 0           | 0           |
| UIJ65584.1 | Gfo/Idh/MocA_family_oxidoreductase_[Bacillus_cereus]                 | CPTF_Mn         | 0           | 0           | 0           |
| UIJ65584.1 | Gfo/Idh/MocA_family_oxidoreductase_[Bacillus_cereus]                 | CPTF_Ni         | 3807.133333 | 6594.148365 | 173.2050808 |
| UIJ65584.1 | Gfo/Idh/MocA_family_oxidoreductase_[Bacillus_cereus]                 | CPTF_U          | 0           | 0           | 0           |
| UIJ65584.1 | Gfo/Idh/MocA_family_oxidoreductase_[Bacillus_cereus]                 | CPTF_metals_mix | 56577.63333 | 18767.48783 | 33.17121399 |
| UIJ65584.1 | Gfo/Idh/MocA_family_oxidoreductase_[Bacillus_cereus]                 | CPTF_zcontrol   | 0           | 0           | 0           |
| UIJ65589.1 | catabolite_control_protein_A_[Bacillus_cereus]                       | CPTF_Al         | 331883.6    | 125921.4226 | 37.94144169 |
| UIJ65589.1 | catabolite_control_protein_A_[Bacillus_cereus]                       | CPTF_Cd         | 327554.7333 | 123911.7832 | 37.82933678 |
| UIJ65589.1 | catabolite_control_protein_A_[Bacillus_cereus]                       | CPTF_Co         | 620221.3333 | 232730.1528 | 37.52372585 |
| UIJ65589.1 | catabolite_control_protein_A_[Bacillus_cereus]                       | CPTF_Cu         | 546549.7333 | 92485.18484 | 16.9216412  |
| UIJ65589.1 | catabolite_control_protein_A_[Bacillus_cereus]                       | CPTF_Fe         | 289693.4667 | 217715.7689 | 75.15384154 |
| UIJ65589.1 | catabolite_control_protein_A_[Bacillus_cereus]                       | CPTF_Mn         | 381517.3667 | 141001.6124 | 36.95811113 |
| UIJ65589.1 | catabolite_control_protein_A_[Bacillus_cereus]                       | CPTF_Ni         | 231310.5    | 156494.7163 | 67.65569066 |
| UIJ65589.1 | catabolite_control_protein_A_[Bacillus_cereus]                       | CPTF_U          | 85634.56667 | 148323.4204 | 173.2050808 |
| UIJ65589.1 | catabolite_control_protein_A_[Bacillus_cereus]                       | CPTF_metals_mix | 1637574.867 | 475649.0067 | 29.0459396  |
| UIJ65589.1 | catabolite_control_protein_A_[Bacillus_cereus]                       | CPTF_zcontrol   | 351098.3333 | 72622.50383 | 20.68437726 |
| UIJ65591.1 | CamS_family_sex_pheromone_protein_[Bacillus_cereus]                  | CPTF_Al         | 0           | 0           | 0           |
| UIJ65591.1 | CamS_family_sex_pheromone_protein_[Bacillus_cereus]                  | CPTF_Cd         | 0           | 0           | 0           |
| UIJ65591.1 | CamS_family_sex_pheromone_protein_[Bacillus_cereus]                  | CPTF_Co         | 27104.7     | 23476.30388 | 86.6134061  |
| UIJ65591.1 | CamS_family_sex_pheromone_protein_[Bacillus_cereus]                  | CPTF_Cu         | 65412.46667 | 13513.41738 | 20.65877969 |
| UIJ65591.1 | CamS_family_sex_pheromone_protein_[Bacillus_cereus]                  | CPTF_Fe         | 0           | 0           | 0           |
| UIJ65591.1 | CamS_family_sex_pheromone_protein_[Bacillus_cereus]                  | CPTF_Mn         | 0           | 0           | 0           |
| UIJ65591.1 | CamS_family_sex_pheromone_protein_[Bacillus_cereus]                  | CPTF_Ni         | 35949.73333 | 35483.28078 | 98.70248675 |
| UIJ65591.1 | CamS_family_sex_pheromone_protein_[Bacillus_cereus]                  | CPTF_U          | 0           | 0           | 0           |
| UIJ65591.1 | CamS_family_sex_pheromone_protein_[Bacillus_cereus]                  | CPTF_metals_mix | 58212.9     | 20696.64825 | 35.5533709  |
| UIJ65591.1 | CamS_family_sex_pheromone_protein_[Bacillus_cereus]                  | CPTF_zcontrol   | 15423.46667 | 26714.2279  | 173.2050808 |
| UIJ65593.1 | DUF948_domain-containing_protein_[Bacillus_cereus]                   | CPTF_Al         | 634464.3333 | 298057.4302 | 46.97780704 |
| UIJ65593.1 | DUF948_domain-containing_protein_[Bacillus_cereus]                   | CPTF_Cd         | 529545      | 293085.2611 | 55.34662042 |
| UIJ65593.1 | DUF948_domain-containing_protein_[Bacillus_cereus]                   | CPTF_Co         | 520738.6667 | 278819.412  | 53.54305909 |
| UIJ65593.1 | DUF948_domain-containing_protein_[Bacillus_cereus]                   | CPTF_Cu         | 844828.3333 | 17910.57259 | 2.120025084 |
| UIJ65593.1 | DUF948_domain-containing_protein_[Bacillus_cereus]                   | CPTF_Fe         | 578561.6667 | 226204.7767 | 39.09778157 |
| UIJ65593.1 | DUF948_domain-containing_protein_[Bacillus_cereus]                   | CPTF_Mn         | 523255.3333 | 117015.6274 | 22.36300711 |
| UIJ65593.1 | DUF948_domain-containing_protein_[Bacillus_cereus]                   | CPTF_Ni         | 387614.3333 | 157922.3487 | 40.74213338 |
| UIJ65593.1 | DUF948_domain-containing_protein_[Bacillus_cereus]                   | CPTF_U          | 496139.4    | 129779.8028 | 26.15793119 |

|            |                                                          |                 |              |             |             |
|------------|----------------------------------------------------------|-----------------|--------------|-------------|-------------|
| UIJ65593.1 | DUF948_domain-containing_protein_[Bacillus_cereus]       | CPTF_metals_mix | 872283.3333  | 64166.01201 | 7.356097447 |
| UIJ65593.1 | DUF948_domain-containing_protein_[Bacillus_cereus]       | CPTF_zcontrol   | 675369.4     | 243181.1239 | 36.00712793 |
| UIJ65594.1 | aminopeptidase_[Bacillus_cereus]                         | CPTF_Al         | 3149467.333  | 109941.1665 | 3.490786057 |
| UIJ65594.1 | aminopeptidase_[Bacillus_cereus]                         | CPTF_Cd         | 2770696      | 199184.3289 | 7.188963673 |
| UIJ65594.1 | aminopeptidase_[Bacillus_cereus]                         | CPTF_Co         | 2949944      | 226702.7342 | 7.684984333 |
| UIJ65594.1 | aminopeptidase_[Bacillus_cereus]                         | CPTF_Cu         | 3126203.7    | 31049.81476 | 0.993211503 |
| UIJ65594.1 | aminopeptidase_[Bacillus_cereus]                         | CPTF_Fe         | 2902847.333  | 178921.9752 | 6.163671511 |
| UIJ65594.1 | aminopeptidase_[Bacillus_cereus]                         | CPTF_Mn         | 3100523.333  | 238261.5183 | 7.684558144 |
| UIJ65594.1 | aminopeptidase_[Bacillus_cereus]                         | CPTF_Ni         | 2941252.567  | 158783.7553 | 5.398508005 |
| UIJ65594.1 | aminopeptidase_[Bacillus_cereus]                         | CPTF_U          | 2771779.3    | 103006.1842 | 3.71624769  |
| UIJ65594.1 | aminopeptidase_[Bacillus_cereus]                         | CPTF_metals_mix | 2903156.167  | 309379.0739 | 10.65664594 |
| UIJ65594.1 | aminopeptidase_[Bacillus_cereus]                         | CPTF_zcontrol   | 2963318      | 198287.8787 | 6.691414106 |
| UIJ65601.1 | UDP-N-acetylmuramate--L-alanine_ligase_[Bacillus_cereus] | CPTF_Al         | 510359.0667  | 261941.4111 | 51.32492556 |
| UIJ65601.1 | UDP-N-acetylmuramate--L-alanine_ligase_[Bacillus_cereus] | CPTF_Cd         | 484989.9667  | 309741.0417 | 63.86545352 |
| UIJ65601.1 | UDP-N-acetylmuramate--L-alanine_ligase_[Bacillus_cereus] | CPTF_Co         | 604350.4667  | 101979.9003 | 16.87429826 |
| UIJ65601.1 | UDP-N-acetylmuramate--L-alanine_ligase_[Bacillus_cereus] | CPTF_Cu         | 778836.4     | 86510.29634 | 11.10763394 |
| UIJ65601.1 | UDP-N-acetylmuramate--L-alanine_ligase_[Bacillus_cereus] | CPTF_Fe         | 426828.1     | 290617.8868 | 68.08780555 |
| UIJ65601.1 | UDP-N-acetylmuramate--L-alanine_ligase_[Bacillus_cereus] | CPTF_Mn         | 278896.7333  | 81792.03923 | 29.32699794 |
| UIJ65601.1 | UDP-N-acetylmuramate--L-alanine_ligase_[Bacillus_cereus] | CPTF_Ni         | 414509.8333  | 230581.2572 | 55.62745166 |
| UIJ65601.1 | UDP-N-acetylmuramate--L-alanine_ligase_[Bacillus_cereus] | CPTF_U          | 304385.3333  | 69274.1937  | 22.75871605 |
| UIJ65601.1 | UDP-N-acetylmuramate--L-alanine_ligase_[Bacillus_cereus] | CPTF_metals_mix | 526866.3     | 54663.53545 | 10.37521957 |
| UIJ65601.1 | UDP-N-acetylmuramate--L-alanine_ligase_[Bacillus_cereus] | CPTF_zcontrol   | 445779.1667  | 191271.3395 | 42.90719571 |
| UIJ65602.1 | nicotinate_phosphoribosyltransferase_[Bacillus_cereus]   | CPTF_Al         | 10998.4      | 19049.7876  | 173.2050808 |
| UIJ65602.1 | nicotinate_phosphoribosyltransferase_[Bacillus_cereus]   | CPTF_Cd         | 6241.76667   | 10811.057   | 173.2050808 |
| UIJ65602.1 | nicotinate_phosphoribosyltransferase_[Bacillus_cereus]   | CPTF_Co         | 6006.033333  | 10402.75489 | 173.2050808 |
| UIJ65602.1 | nicotinate_phosphoribosyltransferase_[Bacillus_cereus]   | CPTF_Cu         | 5182.66667   | 8976.641985 | 173.2050808 |
| UIJ65602.1 | nicotinate_phosphoribosyltransferase_[Bacillus_cereus]   | CPTF_Fe         | 8522.333333  | 14761.11433 | 173.2050808 |
| UIJ65602.1 | nicotinate_phosphoribosyltransferase_[Bacillus_cereus]   | CPTF_Mn         | 75455.76667  | 73277.02974 | 97.11256406 |
| UIJ65602.1 | nicotinate_phosphoribosyltransferase_[Bacillus_cereus]   | CPTF_Ni         | 7776.96667   | 13470.1014  | 173.2050808 |
| UIJ65602.1 | nicotinate_phosphoribosyltransferase_[Bacillus_cereus]   | CPTF_U          | 0            | 0           | 0           |
| UIJ65602.1 | nicotinate_phosphoribosyltransferase_[Bacillus_cereus]   | CPTF_metals_mix | 49482.86667  | 58004.29636 | 117.2209701 |
| UIJ65602.1 | nicotinate_phosphoribosyltransferase_[Bacillus_cereus]   | CPTF_zcontrol   | 32133.33333  | 55656.56595 | 173.2050808 |
| UIJ65603.1 | DNA_translocase_FtsK_[Bacillus_cereus]                   | CPTF_Al         | 0            | 0           | 0           |
| UIJ65603.1 | DNA_translocase_FtsK_[Bacillus_cereus]                   | CPTF_Cd         | 0            | 0           | 0           |
| UIJ65603.1 | DNA_translocase_FtsK_[Bacillus_cereus]                   | CPTF_Co         | 14303.16667  | 24773.81138 | 173.2050808 |
| UIJ65603.1 | DNA_translocase_FtsK_[Bacillus_cereus]                   | CPTF_Cu         | 0            | 0           | 0           |
| UIJ65603.1 | DNA_translocase_FtsK_[Bacillus_cereus]                   | CPTF_Fe         | 0            | 0           | 0           |
| UIJ65603.1 | DNA_translocase_FtsK_[Bacillus_cereus]                   | CPTF_Mn         | 0            | 0           | 0           |
| UIJ65603.1 | DNA_translocase_FtsK_[Bacillus_cereus]                   | CPTF_Ni         | 0            | 0           | 0           |
| UIJ65603.1 | DNA_translocase_FtsK_[Bacillus_cereus]                   | CPTF_U          | 0            | 0           | 0           |
| UIJ65603.1 | DNA_translocase_FtsK_[Bacillus_cereus]                   | CPTF_metals_mix | 14838.26667  | 25700.63176 | 173.2050808 |
| UIJ65603.1 | DNA_translocase_FtsK_[Bacillus_cereus]                   | CPTF_zcontrol   | 0            | 0           | 0           |
| UIJ65606.1 | DUF4479_domain-containing_protein_[Bacillus_cereus]      | CPTF_Al         | 2221640.233  | 45949.34062 | 2.068261995 |
| UIJ65606.1 | DUF4479_domain-containing_protein_[Bacillus_cereus]      | CPTF_Cd         | 2303617.533  | 74496.8279  | 3.233906099 |
| UIJ65606.1 | DUF4479_domain-containing_protein_[Bacillus_cereus]      | CPTF_Co         | 2268289.333  | 85690.25651 | 3.77774807  |
| UIJ65606.1 | DUF4479_domain-containing_protein_[Bacillus_cereus]      | CPTF_Cu         | 2168150      | 79381.42932 | 3.661251727 |
| UIJ65606.1 | DUF4479_domain-containing_protein_[Bacillus_cereus]      | CPTF_Fe         | 22214168.333 | 122383.9592 | 5.52731052  |
| UIJ65606.1 | DUF4479_domain-containing_protein_[Bacillus_cereus]      | CPTF_Mn         | 2120632.667  | 286107.1988 | 13.49159632 |
| UIJ65606.1 | DUF4479_domain-containing_protein_[Bacillus_cereus]      | CPTF_Ni         | 2296879.333  | 129085.7916 | 5.620051072 |
| UIJ65606.1 | DUF4479_domain-containing_protein_[Bacillus_cereus]      | CPTF_U          | 2556196.4    | 45029.24055 | 1.76157202  |
| UIJ65606.1 | DUF4479_domain-containing_protein_[Bacillus_cereus]      | CPTF_metals_mix | 1897373.5    | 75435.68221 | 3.975795077 |
| UIJ65606.1 | DUF4479_domain-containing_protein_[Bacillus_cereus]      | CPTF_zcontrol   | 2124695.3    | 89181.05564 | 4.197357411 |
| UIJ65608.1 | thioredoxin_family_protein_[Bacillus_cereus]             | CPTF_Al         | 1001775.333  | 208450.0954 | 20.80806828 |
| UIJ65608.1 | thioredoxin_family_protein_[Bacillus_cereus]             | CPTF_Cd         | 1386162.3    | 73006.23883 | 5.26678866  |
| UIJ65608.1 | thioredoxin_family_protein_[Bacillus_cereus]             | CPTF_Co         | 983968       | 141936.0353 | 14.42486294 |
| UIJ65608.1 | thioredoxin_family_protein_[Bacillus_cereus]             | CPTF_Cu         | 876273.6667  | 88417.31715 | 10.09014883 |
| UIJ65608.1 | thioredoxin_family_protein_[Bacillus_cereus]             | CPTF_Fe         | 1122662.667  | 97466.55171 | 8.681730907 |
| UIJ65608.1 | thioredoxin_family_protein_[Bacillus_cereus]             | CPTF_Mn         | 925620.3333  | 172790.7316 | 18.66756005 |
| UIJ65608.1 | thioredoxin_family_protein_[Bacillus_cereus]             | CPTF_Ni         | 581101.3333  | 66928.1387  | 11.51746431 |
| UIJ65608.1 | thioredoxin_family_protein_[Bacillus_cereus]             | CPTF_U          | 902601.3333  | 132247.0662 | 14.65176943 |
| UIJ65608.1 | thioredoxin_family_protein_[Bacillus_cereus]             | CPTF_metals_mix | 2116633.533  | 212358.7336 | 10.03285312 |

|            |                                                    |                 |             |             |             |
|------------|----------------------------------------------------|-----------------|-------------|-------------|-------------|
| UIJ65608.1 | thioredoxin_family_protein_[Bacillus_cereus]       | CPTF_zcontrol   | 789459      | 158606.2243 | 20.09049543 |
| UIJ65610.1 | M42_family_metallopeptidase_[Bacillus_cereus]      | CPTF_Al         | 3879212.333 | 246960.8687 | 6.366263238 |
| UIJ65610.1 | M42_family_metallopeptidase_[Bacillus_cereus]      | CPTF_Cd         | 4025105     | 531809.5039 | 13.21231381 |
| UIJ65610.1 | M42_family_metallopeptidase_[Bacillus_cereus]      | CPTF_Co         | 4064262.667 | 442779.2915 | 10.89445559 |
| UIJ65610.1 | M42_family_metallopeptidase_[Bacillus_cereus]      | CPTF_Cu         | 3247545     | 591476.828  | 18.21304487 |
| UIJ65610.1 | M42_family_metallopeptidase_[Bacillus_cereus]      | CPTF_Fe         | 3618176     | 480473.4296 | 13.27943775 |
| UIJ65610.1 | M42_family_metallopeptidase_[Bacillus_cereus]      | CPTF_Mn         | 4542523     | 645815.0337 | 14.21709992 |
| UIJ65610.1 | M42_family_metallopeptidase_[Bacillus_cereus]      | CPTF_Ni         | 3175724.333 | 646945.7298 | 20.37159595 |
| UIJ65610.1 | M42_family_metallopeptidase_[Bacillus_cereus]      | CPTF_U          | 3008096     | 234660.2973 | 7.800957725 |
| UIJ65610.1 | M42_family_metallopeptidase_[Bacillus_cereus]      | CPTF_metals_mix | 3813132.667 | 431653.8504 | 11.32018968 |
| UIJ65610.1 | M42_family_metallopeptidase_[Bacillus_cereus]      | CPTF_zcontrol   | 3602597.333 | 596492.5133 | 16.5572907  |
| UIJ65611.1 | PepSY_domain-containing_protein_[Bacillus_cereus]  | CPTF_Al         | 750152.5    | 62235.87617 | 8.296429883 |
| UIJ65611.1 | PepSY_domain-containing_protein_[Bacillus_cereus]  | CPTF_Cd         | 817439.3333 | 43319.87655 | 5.299460741 |
| UIJ65611.1 | PepSY_domain-containing_protein_[Bacillus_cereus]  | CPTF_Co         | 667361.3333 | 94700.21184 | 14.19024554 |
| UIJ65611.1 | PepSY_domain-containing_protein_[Bacillus_cereus]  | CPTF_Cu         | 726402.9333 | 124946.6612 | 17.20073742 |
| UIJ65611.1 | PepSY_domain-containing_protein_[Bacillus_cereus]  | CPTF_Fe         | 728703.8    | 52204.04928 | 7.163960073 |
| UIJ65611.1 | PepSY_domain-containing_protein_[Bacillus_cereus]  | CPTF_Mn         | 650292.1333 | 124095.0403 | 19.08296808 |
| UIJ65611.1 | PepSY_domain-containing_protein_[Bacillus_cereus]  | CPTF_Ni         | 652711.5667 | 73109.04904 | 11.20082021 |
| UIJ65611.1 | PepSY_domain-containing_protein_[Bacillus_cereus]  | CPTF_U          | 759239.3667 | 55890.65411 | 7.361400971 |
| UIJ65611.1 | PepSY_domain-containing_protein_[Bacillus_cereus]  | CPTF_metals_mix | 776104.3333 | 11270.29903 | 1.452162879 |
| UIJ65611.1 | PepSY_domain-containing_protein_[Bacillus_cereus]  | CPTF_zcontrol   | 698069.4333 | 53140.39099 | 7.612479282 |
| UIJ65612.1 | MBL_fold_metallo-hydrolase_[Bacillus_cereus]       | CPTF_Al         | 170607.6    | 47584.12534 | 27.89097633 |
| UIJ65612.1 | MBL_fold_metallo-hydrolase_[Bacillus_cereus]       | CPTF_Cd         | 159127.4    | 21993.94775 | 13.82159688 |
| UIJ65612.1 | MBL_fold_metallo-hydrolase_[Bacillus_cereus]       | CPTF_Co         | 134353.3667 | 40673.56497 | 30.27357332 |
| UIJ65612.1 | MBL_fold_metallo-hydrolase_[Bacillus_cereus]       | CPTF_Cu         | 130398      | 10021.96528 | 7.685674072 |
| UIJ65612.1 | MBL_fold_metallo-hydrolase_[Bacillus_cereus]       | CPTF_Fe         | 128162.3333 | 7107.39357  | 5.545617946 |
| UIJ65612.1 | MBL_fold_metallo-hydrolase_[Bacillus_cereus]       | CPTF_Mn         | 128892      | 2702.160432 | 2.096453179 |
| UIJ65612.1 | MBL_fold_metallo-hydrolase_[Bacillus_cereus]       | CPTF_Ni         | 131393.3333 | 26949.9445  | 20.51089185 |
| UIJ65612.1 | MBL_fold_metallo-hydrolase_[Bacillus_cereus]       | CPTF_U          | 37807.33333 | 65484.22223 | 173.2050808 |
| UIJ65612.1 | MBL_fold_metallo-hydrolase_[Bacillus_cereus]       | CPTF_metals_mix | 93340.13333 | 39185.27293 | 41.98116237 |
| UIJ65612.1 | MBL_fold_metallo-hydrolase_[Bacillus_cereus]       | CPTF_zcontrol   | 88121.03333 | 40441.55993 | 45.89319757 |
| UIJ65618.1 | dipeptidase_PepV_[Bacillus_cereus]                 | CPTF_Al         | 2378710.567 | 661834.287  | 27.82323736 |
| UIJ65618.1 | dipeptidase_PepV_[Bacillus_cereus]                 | CPTF_Cd         | 2315217.933 | 397988.9849 | 17.19013054 |
| UIJ65618.1 | dipeptidase_PepV_[Bacillus_cereus]                 | CPTF_Co         | 2888929.133 | 203273.7668 | 7.036301599 |
| UIJ65618.1 | dipeptidase_PepV_[Bacillus_cereus]                 | CPTF_Cu         | 2838338.933 | 406238.9498 | 14.31255954 |
| UIJ65618.1 | dipeptidase_PepV_[Bacillus_cereus]                 | CPTF_Fe         | 2660158.733 | 204671.2875 | 7.693950173 |
| UIJ65618.1 | dipeptidase_PepV_[Bacillus_cereus]                 | CPTF_Mn         | 2239711.567 | 208823.1021 | 9.323660473 |
| UIJ65618.1 | dipeptidase_PepV_[Bacillus_cereus]                 | CPTF_Ni         | 2265892.567 | 408427.2136 | 18.02500346 |
| UIJ65618.1 | dipeptidase_PepV_[Bacillus_cereus]                 | CPTF_U          | 2240905.7   | 124973.1055 | 5.576901585 |
| UIJ65618.1 | dipeptidase_PepV_[Bacillus_cereus]                 | CPTF_metals_mix | 2930176.467 | 277581.0777 | 9.473186372 |
| UIJ65618.1 | dipeptidase_PepV_[Bacillus_cereus]                 | CPTF_zcontrol   | 2340020.533 | 184215.0559 | 7.872369206 |
| UIJ65626.1 | SRPBCC_domain-containing_protein_[Bacillus_cereus] | CPTF_Al         | 26775       | 23258.36556 | 86.86597783 |
| UIJ65626.1 | SRPBCC_domain-containing_protein_[Bacillus_cereus] | CPTF_Cd         | 49204.16667 | 21361.86968 | 43.41475759 |
| UIJ65626.1 | SRPBCC_domain-containing_protein_[Bacillus_cereus] | CPTF_Co         | 46454.6     | 40254.15636 | 86.65268103 |
| UIJ65626.1 | SRPBCC_domain-containing_protein_[Bacillus_cereus] | CPTF_Cu         | 78888.7     | 9272.871578 | 11.7543724  |
| UIJ65626.1 | SRPBCC_domain-containing_protein_[Bacillus_cereus] | CPTF_Fe         | 43211.53333 | 37527.16607 | 86.84525444 |
| UIJ65626.1 | SRPBCC_domain-containing_protein_[Bacillus_cereus] | CPTF_Mn         | 27626.26667 | 47850.09749 | 173.2050808 |
| UIJ65626.1 | SRPBCC_domain-containing_protein_[Bacillus_cereus] | CPTF_Ni         | 41479.13333 | 36144.53347 | 87.13907588 |
| UIJ65626.1 | SRPBCC_domain-containing_protein_[Bacillus_cereus] | CPTF_U          | 21672.63333 | 37538.10207 | 173.2050808 |
| UIJ65626.1 | SRPBCC_domain-containing_protein_[Bacillus_cereus] | CPTF_metals_mix | 83620.36667 | 40930.71269 | 48.94825785 |
| UIJ65626.1 | SRPBCC_domain-containing_protein_[Bacillus_cereus] | CPTF_zcontrol   | 0           | 0           | 0           |
| UIJ65630.1 | transcription_factor_YdeB_[Bacillus_cereus]        | CPTF_Al         | 0           | 0           | 0           |
| UIJ65630.1 | transcription_factor_YdeB_[Bacillus_cereus]        | CPTF_Cd         | 0           | 0           | 0           |
| UIJ65630.1 | transcription_factor_YdeB_[Bacillus_cereus]        | CPTF_Co         | 0           | 0           | 0           |
| UIJ65630.1 | transcription_factor_YdeB_[Bacillus_cereus]        | CPTF_Cu         | 0           | 0           | 0           |
| UIJ65630.1 | transcription_factor_YdeB_[Bacillus_cereus]        | CPTF_Fe         | 0           | 0           | 0           |
| UIJ65630.1 | transcription_factor_YdeB_[Bacillus_cereus]        | CPTF_Mn         | 0           | 0           | 0           |
| UIJ65630.1 | transcription_factor_YdeB_[Bacillus_cereus]        | CPTF_Ni         | 13882.76667 | 24045.65722 | 173.2050808 |
| UIJ65630.1 | transcription_factor_YdeB_[Bacillus_cereus]        | CPTF_U          | 0           | 0           | 0           |
| UIJ65630.1 | transcription_factor_YdeB_[Bacillus_cereus]        | CPTF_metals_mix | 0           | 0           | 0           |
| UIJ65630.1 | transcription_factor_YdeB_[Bacillus_cereus]        | CPTF_zcontrol   | 0           | 0           | 0           |

|            |                                                                   |                 |             |             |             |
|------------|-------------------------------------------------------------------|-----------------|-------------|-------------|-------------|
| UIJ65634.1 | molybdopterin_synthase_catalytic_subunit_MoaE_[Bacillus_cereus]   | CPTF_Al         | 24028.63333 | 26038.47984 | 108.3643813 |
| UIJ65634.1 | molybdopterin_synthase_catalytic_subunit_MoaE_[Bacillus_cereus]   | CPTF_Cd         | 14579.73333 | 25252.83889 | 173.2050808 |
| UIJ65634.1 | molybdopterin_synthase_catalytic_subunit_MoaE_[Bacillus_cereus]   | CPTF_Co         | 0           | 0           | 0           |
| UIJ65634.1 | molybdopterin_synthase_catalytic_subunit_MoaE_[Bacillus_cereus]   | CPTF_Cu         | 9981.2      | 17287.94552 | 173.2050808 |
| UIJ65634.1 | molybdopterin_synthase_catalytic_subunit_MoaE_[Bacillus_cereus]   | CPTF_Fe         | 0           | 0           | 0           |
| UIJ65634.1 | molybdopterin_synthase_catalytic_subunit_MoaE_[Bacillus_cereus]   | CPTF_Mn         | 0           | 0           | 0           |
| UIJ65634.1 | molybdopterin_synthase_catalytic_subunit_MoaE_[Bacillus_cereus]   | CPTF_Ni         | 38140.16667 | 44037.10876 | 115.4612384 |
| UIJ65634.1 | molybdopterin_synthase_catalytic_subunit_MoaE_[Bacillus_cereus]   | CPTF_U          | 6586.73333  | 11408.55679 | 173.2050808 |
| UIJ65634.1 | molybdopterin_synthase_catalytic_subunit_MoaE_[Bacillus_cereus]   | CPTF_metals_mix | 35240.16667 | 34029.92013 | 96.56571846 |
| UIJ65634.1 | molybdopterin_synthase_catalytic_subunit_MoaE_[Bacillus_cereus]   | CPTF_zcontrol   | 28211.4     | 25797.23272 | 91.4425825  |
| UIJ65636.1 | molybdopterin_molybdotransferase_MoaE_[Bacillus_cereus]           | CPTF_Al         | 87788.56667 | 22782.69897 | 25.95178374 |
| UIJ65636.1 | molybdopterin_molybdotransferase_MoaE_[Bacillus_cereus]           | CPTF_Cd         | 74083.53333 | 40672.95168 | 54.90147385 |
| UIJ65636.1 | molybdopterin_molybdotransferase_MoaE_[Bacillus_cereus]           | CPTF_Co         | 56518.8     | 50036.21747 | 88.5302191  |
| UIJ65636.1 | molybdopterin_molybdotransferase_MoaE_[Bacillus_cereus]           | CPTF_Cu         | 54670.8     | 47581.87443 | 87.03343363 |
| UIJ65636.1 | molybdopterin_molybdotransferase_MoaE_[Bacillus_cereus]           | CPTF_Fe         | 75007.33333 | 17567.49699 | 23.42103927 |
| UIJ65636.1 | molybdopterin_molybdotransferase_MoaE_[Bacillus_cereus]           | CPTF_Mn         | 25602.46667 | 44344.77307 | 173.2050808 |
| UIJ65636.1 | molybdopterin_molybdotransferase_MoaE_[Bacillus_cereus]           | CPTF_Ni         | 104567.5333 | 24304.64035 | 23.2430082  |
| UIJ65636.1 | molybdopterin_molybdotransferase_MoaE_[Bacillus_cereus]           | CPTF_U          | 104443.7333 | 39752.43072 | 38.06109706 |
| UIJ65636.1 | molybdopterin_molybdotransferase_MoaE_[Bacillus_cereus]           | CPTF_metals_mix | 45209.63333 | 21606.31997 | 47.79140722 |
| UIJ65636.1 | molybdopterin_molybdotransferase_MoaE_[Bacillus_cereus]           | CPTF_zcontrol   | 0           | 0           | 0           |
| UIJ65637.1 | cyclic_pyranopterin_monophosphate_synthase_MoaC_[Bacillus_cereus] | CPTF_Al         | 69393.36667 | 68519.39585 | 98.74055568 |
| UIJ65637.1 | cyclic_pyranopterin_monophosphate_synthase_MoaC_[Bacillus_cereus] | CPTF_Cd         | 43104.33333 | 74658.89536 | 173.2050808 |
| UIJ65637.1 | cyclic_pyranopterin_monophosphate_synthase_MoaC_[Bacillus_cereus] | CPTF_Co         | 38579       | 66820.78811 | 173.2050808 |
| UIJ65637.1 | cyclic_pyranopterin_monophosphate_synthase_MoaC_[Bacillus_cereus] | CPTF_Cu         | 115126      | 5350.41746  | 4.647444939 |
| UIJ65637.1 | cyclic_pyranopterin_monophosphate_synthase_MoaC_[Bacillus_cereus] | CPTF_Fe         | 56608.8     | 49027.40494 | 86.60739133 |
| UIJ65637.1 | cyclic_pyranopterin_monophosphate_synthase_MoaC_[Bacillus_cereus] | CPTF_Mn         | 21013.83333 | 36397.027   | 173.2050808 |
| UIJ65637.1 | cyclic_pyranopterin_monophosphate_synthase_MoaC_[Bacillus_cereus] | CPTF_Ni         | 48522.5     | 48577.24222 | 100.1128182 |
| UIJ65637.1 | cyclic_pyranopterin_monophosphate_synthase_MoaC_[Bacillus_cereus] | CPTF_U          | 56088       | 66099.36995 | 117.8493973 |
| UIJ65637.1 | cyclic_pyranopterin_monophosphate_synthase_MoaC_[Bacillus_cereus] | CPTF_metals_mix | 164878      | 23637.39721 | 14.33629545 |
| UIJ65637.1 | cyclic_pyranopterin_monophosphate_synthase_MoaC_[Bacillus_cereus] | CPTF_zcontrol   | 0           | 0           | 0           |
| UIJ65638.1 | molybdopterin-synthase_adenylyltransferase_MoeB_[Bacillus_cereus] | CPTF_Al         | 43860       | 75967.74842 | 173.2050808 |
| UIJ65638.1 | molybdopterin-synthase_adenylyltransferase_MoeB_[Bacillus_cereus] | CPTF_Cd         | 56244       | 62280.55444 | 95.45790331 |
| UIJ65638.1 | molybdopterin-synthase_adenylyltransferase_MoeB_[Bacillus_cereus] | CPTF_Co         | 87574.53333 | 20843.58846 | 23.80097006 |
| UIJ65638.1 | molybdopterin-synthase_adenylyltransferase_MoeB_[Bacillus_cereus] | CPTF_Cu         | 58168.5     | 55393.10139 | 95.22869146 |
| UIJ65638.1 | molybdopterin-synthase_adenylyltransferase_MoeB_[Bacillus_cereus] | CPTF_Fe         | 64774.26667 | 65396.1262  | 100.960041  |
| UIJ65638.1 | molybdopterin-synthase_adenylyltransferase_MoeB_[Bacillus_cereus] | CPTF_Mn         | 26432.96667 | 45783.24126 | 173.2050808 |
| UIJ65638.1 | molybdopterin-synthase_adenylyltransferase_MoeB_[Bacillus_cereus] | CPTF_Ni         | 77321.7     | 69250.98471 | 89.56216005 |
| UIJ65638.1 | molybdopterin-synthase_adenylyltransferase_MoeB_[Bacillus_cereus] | CPTF_U          | 26302.9     | 45557.95919 | 173.2050808 |
| UIJ65638.1 | molybdopterin-synthase_adenylyltransferase_MoeB_[Bacillus_cereus] | CPTF_metals_mix | 57433.96667 | 6574.584635 | 11.44720627 |
| UIJ65638.1 | molybdopterin-synthase_adenylyltransferase_MoeB_[Bacillus_cereus] | CPTF_zcontrol   | 44114.23333 | 45461.14547 | 103.0532371 |
| UIJ65643.1 | rhodanese-like_domain-containing_protein_[Bacillus_cereus]        | CPTF_Al         | 37661.43333 | 34077.74102 | 90.48445056 |
| UIJ65643.1 | rhodanese-like_domain-containing_protein_[Bacillus_cereus]        | CPTF_Cd         | 204895      | 109504.1866 | 53.44405019 |
| UIJ65643.1 | rhodanese-like_domain-containing_protein_[Bacillus_cereus]        | CPTF_Co         | 38190.73333 | 33307.85538 | 87.21449543 |
| UIJ65643.1 | rhodanese-like_domain-containing_protein_[Bacillus_cereus]        | CPTF_Cu         | 112403.3333 | 99954.0338  | 88.92443919 |
| UIJ65643.1 | rhodanese-like_domain-containing_protein_[Bacillus_cereus]        | CPTF_Fe         | 180390      | 41697.57795 | 23.11523807 |
| UIJ65643.1 | rhodanese-like_domain-containing_protein_[Bacillus_cereus]        | CPTF_Mn         | 87037       | 150752.5061 | 173.2050808 |
| UIJ65643.1 | rhodanese-like_domain-containing_protein_[Bacillus_cereus]        | CPTF_Ni         | 46887.33333 | 81211.24356 | 173.2050808 |
| UIJ65643.1 | rhodanese-like_domain-containing_protein_[Bacillus_cereus]        | CPTF_U          | 0           | 0           | 0           |
| UIJ65643.1 | rhodanese-like_domain-containing_protein_[Bacillus_cereus]        | CPTF_metals_mix | 269029.1    | 37415.68808 | 13.90767321 |
| UIJ65643.1 | rhodanese-like_domain-containing_protein_[Bacillus_cereus]        | CPTF_zcontrol   | 30330.13333 | 52533.33193 | 173.2050808 |
| UIJ65651.1 | leucine--trNA_ligase_[Bacillus_cereus]                            | CPTF_Al         | 1027036.2   | 183492.4322 | 17.86620883 |
| UIJ65651.1 | leucine--trNA_ligase_[Bacillus_cereus]                            | CPTF_Cd         | 1599289.567 | 218318.5424 | 13.65097021 |
| UIJ65651.1 | leucine--trNA_ligase_[Bacillus_cereus]                            | CPTF_Co         | 1398511.967 | 311596.7437 | 22.28059188 |
| UIJ65651.1 | leucine--trNA_ligase_[Bacillus_cereus]                            | CPTF_Cu         | 1292486.333 | 185292.5911 | 14.33613542 |
| UIJ65651.1 | leucine--trNA_ligase_[Bacillus_cereus]                            | CPTF_Fe         | 1083353.233 | 174170.5257 | 16.07698397 |
| UIJ65651.1 | leucine--trNA_ligase_[Bacillus_cereus]                            | CPTF_Mn         | 996340.1667 | 230145.3699 | 23.09907576 |
| UIJ65651.1 | leucine--trNA_ligase_[Bacillus_cereus]                            | CPTF_Ni         | 773823.6667 | 181588.893  | 23.46644343 |
| UIJ65651.1 | leucine--trNA_ligase_[Bacillus_cereus]                            | CPTF_U          | 879657.8333 | 554131.0297 | 62.99392885 |
| UIJ65651.1 | leucine--trNA_ligase_[Bacillus_cereus]                            | CPTF_metals_mix | 1593277.6   | 170752.9532 | 10.71708742 |
| UIJ65651.1 | leucine--trNA_ligase_[Bacillus_cereus]                            | CPTF_zcontrol   | 616782.84   | 233633.341  | 37.87935166 |
| UIJ65657.1 | ABC_transporter_ATP-binding_protein_[Bacillus_cereus]             | CPTF_Al         | 65089.26667 | 57521.71357 | 88.37357757 |



|            |                                                                 |                 |             |             |             |
|------------|-----------------------------------------------------------------|-----------------|-------------|-------------|-------------|
| UIJ65657.1 | ABC_transporter_ATP-binding_protein_[Bacillus_cereus]           | CPTF_Cd         | 88143.46667 | 49406.84314 | 56.05275696 |
| UIJ65657.1 | ABC_transporter_ATP-binding_protein_[Bacillus_cereus]           | CPTF_Co         | 105392      | 44272.26034 | 42.00723048 |
| UIJ65657.1 | ABC_transporter_ATP-binding_protein_[Bacillus_cereus]           | CPTF_Cu         | 167348.1    | 116558.8227 | 69.6505205  |
| UIJ65657.1 | ABC_transporter_ATP-binding_protein_[Bacillus_cereus]           | CPTF_Fe         | 39037.7     | 41348.15896 | 105.9185325 |
| UIJ65657.1 | ABC_transporter_ATP-binding_protein_[Bacillus_cereus]           | CPTF_Mn         | 42143.8     | 37097.08519 | 88.02501244 |
| UIJ65657.1 | ABC_transporter_ATP-binding_protein_[Bacillus_cereus]           | CPTF_Ni         | 52703.1     | 39815.32838 | 75.54646382 |
| UIJ65657.1 | ABC_transporter_ATP-binding_protein_[Bacillus_cereus]           | CPTF_U          | 0           | 0           | 0           |
| UIJ65657.1 | ABC_transporter_ATP-binding_protein_[Bacillus_cereus]           | CPTF_metals_mix | 475969.1    | 59751.9355  | 12.55374256 |
| UIJ65657.1 | ABC_transporter_ATP-binding_protein_[Bacillus_cereus]           | CPTF_zcontrol   | 98606.86667 | 117765.2647 | 119.4290709 |
| UIJ65672.1 | molybdenum_cofactor_biosynthesis_protein_MoaB_[Bacillus_cereus] | CPTF_Al         | 144054.5667 | 72347.89883 | 50.22256532 |
| UIJ65672.1 | molybdenum_cofactor_biosynthesis_protein_MoaB_[Bacillus_cereus] | CPTF_Cd         | 109159.5667 | 40370.0311  | 36.98258644 |
| UIJ65672.1 | molybdenum_cofactor_biosynthesis_protein_MoaB_[Bacillus_cereus] | CPTF_Co         | 144141.6667 | 31010.33045 | 21.51378651 |
| UIJ65672.1 | molybdenum_cofactor_biosynthesis_protein_MoaB_[Bacillus_cereus] | CPTF_Cu         | 170224      | 19258.14602 | 11.3134141  |
| UIJ65672.1 | molybdenum_cofactor_biosynthesis_protein_MoaB_[Bacillus_cereus] | CPTF_Fe         | 127910.3333 | 36733.49175 | 28.7181581  |
| UIJ65672.1 | molybdenum_cofactor_biosynthesis_protein_MoaB_[Bacillus_cereus] | CPTF_Mn         | 120966.6667 | 105977.569  | 87.60890242 |
| UIJ65672.1 | molybdenum_cofactor_biosynthesis_protein_MoaB_[Bacillus_cereus] | CPTF_Ni         | 113585.8333 | 45150.24735 | 39.74989312 |
| UIJ65672.1 | molybdenum_cofactor_biosynthesis_protein_MoaB_[Bacillus_cereus] | CPTF_U          | 117966.3333 | 105409.1706 | 89.35529966 |
| UIJ65672.1 | molybdenum_cofactor_biosynthesis_protein_MoaB_[Bacillus_cereus] | CPTF_metals_mix | 103593.3    | 31088.99092 | 30.01061933 |
| UIJ65672.1 | molybdenum_cofactor_biosynthesis_protein_MoaB_[Bacillus_cereus] | CPTF_zcontrol   | 141516      | 24134.9907  | 17.05460209 |
| UIJ65675.1 | methionine_adenosyltransferase_[Bacillus_cereus]                | CPTF_Al         | 6014257.6   | 797071.3258 | 13.25302936 |
| UIJ65675.1 | methionine_adenosyltransferase_[Bacillus_cereus]                | CPTF_Cd         | 7798594.633 | 215971.7989 | 2.769368188 |
| UIJ65675.1 | methionine_adenosyltransferase_[Bacillus_cereus]                | CPTF_Co         | 6250976.833 | 672413.4727 | 10.75693433 |
| UIJ65675.1 | methionine_adenosyltransferase_[Bacillus_cereus]                | CPTF_Cu         | 5750815.633 | 323133.2176 | 5.618911093 |
| UIJ65675.1 | methionine_adenosyltransferase_[Bacillus_cereus]                | CPTF_Fe         | 6677554.833 | 1041324.37  | 15.5943964  |
| UIJ65675.1 | methionine_adenosyltransferase_[Bacillus_cereus]                | CPTF_Mn         | 7038053.467 | 2316924.091 | 32.91995581 |
| UIJ65675.1 | methionine_adenosyltransferase_[Bacillus_cereus]                | CPTF_Ni         | 3867378.267 | 505975.879  | 13.08317532 |
| UIJ65675.1 | methionine_adenosyltransferase_[Bacillus_cereus]                | CPTF_U          | 4451556.933 | 705100.0543 | 15.83940327 |
| UIJ65675.1 | methionine_adenosyltransferase_[Bacillus_cereus]                | CPTF_metals_mix | 11498491    | 619930.557  | 5.391407942 |
| UIJ65675.1 | methionine_adenosyltransferase_[Bacillus_cereus]                | CPTF_zcontrol   | 5711958.367 | 679046.1904 | 11.88815021 |
| UIJ65676.1 | phosphoenolpyruvate_carboxykinase_(ATP)_[Bacillus_cereus]       | CPTF_Al         | 747222.9333 | 208795.9818 | 27.94293007 |
| UIJ65676.1 | phosphoenolpyruvate_carboxykinase_(ATP)_[Bacillus_cereus]       | CPTF_Cd         | 1440472.633 | 457199.1122 | 31.73952088 |
| UIJ65676.1 | phosphoenolpyruvate_carboxykinase_(ATP)_[Bacillus_cereus]       | CPTF_Co         | 1136217.733 | 203781.6675 | 17.93508951 |
| UIJ65676.1 | phosphoenolpyruvate_carboxykinase_(ATP)_[Bacillus_cereus]       | CPTF_Cu         | 1283366.067 | 241585.3919 | 18.82435559 |
| UIJ65676.1 | phosphoenolpyruvate_carboxykinase_(ATP)_[Bacillus_cereus]       | CPTF_Fe         | 1116353.667 | 185437.0836 | 16.61096202 |
| UIJ65676.1 | phosphoenolpyruvate_carboxykinase_(ATP)_[Bacillus_cereus]       | CPTF_Mn         | 803810.9333 | 248708.3343 | 30.94114847 |
| UIJ65676.1 | phosphoenolpyruvate_carboxykinase_(ATP)_[Bacillus_cereus]       | CPTF_Ni         | 356211.6667 | 310153.7118 | 87.07005998 |
| UIJ65676.1 | phosphoenolpyruvate_carboxykinase_(ATP)_[Bacillus_cereus]       | CPTF_U          | 408046.4667 | 134713.1478 | 33.01416845 |
| UIJ65676.1 | phosphoenolpyruvate_carboxykinase_(ATP)_[Bacillus_cereus]       | CPTF_metals_mix | 2610053.5   | 201975.1038 | 7.738351104 |
| UIJ65676.1 | phosphoenolpyruvate_carboxykinase_(ATP)_[Bacillus_cereus]       | CPTF_zcontrol   | 775725.3667 | 71029.78944 | 9.156563972 |
| UIJ65699.1 | antimutator_8-oxo-(dGTP/GTP)ase_[Bacillus_cereus]               | CPTF_Al         | 336997.6667 | 91738.31666 | 27.2222409  |
| UIJ65699.1 | antimutator_8-oxo-(dGTP/GTP)ase_[Bacillus_cereus]               | CPTF_Cd         | 197790.5    | 179605.2081 | 90.80578093 |
| UIJ65699.1 | antimutator_8-oxo-(dGTP/GTP)ase_[Bacillus_cereus]               | CPTF_Co         | 267883.1333 | 18133.85399 | 6.769315323 |
| UIJ65699.1 | antimutator_8-oxo-(dGTP/GTP)ase_[Bacillus_cereus]               | CPTF_Cu         | 207132.5    | 120641.6984 | 58.24373211 |
| UIJ65699.1 | antimutator_8-oxo-(dGTP/GTP)ase_[Bacillus_cereus]               | CPTF_Fe         | 282394      | 130658.08   | 46.26800853 |
| UIJ65699.1 | antimutator_8-oxo-(dGTP/GTP)ase_[Bacillus_cereus]               | CPTF_Mn         | 294825.6667 | 255589.0026 | 86.69157117 |
| UIJ65699.1 | antimutator_8-oxo-(dGTP/GTP)ase_[Bacillus_cereus]               | CPTF_Ni         | 197691.3333 | 185873.8923 | 94.02227663 |
| UIJ65699.1 | antimutator_8-oxo-(dGTP/GTP)ase_[Bacillus_cereus]               | CPTF_U          | 335196.3333 | 183792.7647 | 54.83137684 |
| UIJ65699.1 | antimutator_8-oxo-(dGTP/GTP)ase_[Bacillus_cereus]               | CPTF_metals_mix | 709753.8    | 304201.269  | 42.86011136 |
| UIJ65699.1 | antimutator_8-oxo-(dGTP/GTP)ase_[Bacillus_cereus]               | CPTF_zcontrol   | 518360.3667 | 170689.5916 | 32.92875045 |
| UIJ65705.1 | S-ribosylhomocysteine_lyase_LuxS_[Bacillus_cereus]              | CPTF_Al         | 428678.6333 | 72631.57635 | 16.94312959 |
| UIJ65705.1 | S-ribosylhomocysteine_lyase_LuxS_[Bacillus_cereus]              | CPTF_Cd         | 542086.6333 | 107723.1256 | 19.87193908 |
| UIJ65705.1 | S-ribosylhomocysteine_lyase_LuxS_[Bacillus_cereus]              | CPTF_Co         | 662063.0667 | 105122.1967 | 15.87797327 |
| UIJ65705.1 | S-ribosylhomocysteine_lyase_LuxS_[Bacillus_cereus]              | CPTF_Cu         | 511118.9    | 38461.50177 | 7.524961759 |
| UIJ65705.1 | S-ribosylhomocysteine_lyase_LuxS_[Bacillus_cereus]              | CPTF_Fe         | 384146.7    | 74634.1402  | 19.4285517  |
| UIJ65705.1 | S-ribosylhomocysteine_lyase_LuxS_[Bacillus_cereus]              | CPTF_Mn         | 475981.6667 | 129758.705  | 27.26128211 |
| UIJ65705.1 | S-ribosylhomocysteine_lyase_LuxS_[Bacillus_cereus]              | CPTF_Ni         | 592958.0667 | 94055.2684  | 15.86204383 |
| UIJ65705.1 | S-ribosylhomocysteine_lyase_LuxS_[Bacillus_cereus]              | CPTF_U          | 182775.5    | 99949.53173 | 54.68431586 |
| UIJ65705.1 | S-ribosylhomocysteine_lyase_LuxS_[Bacillus_cereus]              | CPTF_metals_mix | 2962216.633 | 948938.4963 | 32.03474336 |
| UIJ65705.1 | S-ribosylhomocysteine_lyase_LuxS_[Bacillus_cereus]              | CPTF_zcontrol   | 406447.4333 | 22130.7742  | 5.444929007 |
| UIJ65707.1 | carbonic_anhydrase_[Bacillus_cereus]                            | CPTF_Al         | 1546066     | 104468.34   | 6.757042711 |
| UIJ65707.1 | carbonic_anhydrase_[Bacillus_cereus]                            | CPTF_Cd         | 1601019.867 | 136627.7091 | 8.533792237 |

|            |                                                           |                 |             |             |             |
|------------|-----------------------------------------------------------|-----------------|-------------|-------------|-------------|
| UIJ65707.1 | carbonic_anhydrase_[Bacillus_cereus]                      | CPTF_Co         | 1391177.567 | 139133.711  | 10.00114682 |
| UIJ65707.1 | carbonic_anhydrase_[Bacillus_cereus]                      | CPTF_Cu         | 1679426.3   | 121037.6098 | 7.207080763 |
| UIJ65707.1 | carbonic_anhydrase_[Bacillus_cereus]                      | CPTF_Fe         | 1549080.633 | 137811.6994 | 8.896354159 |
| UIJ65707.1 | carbonic_anhydrase_[Bacillus_cereus]                      | CPTF_Mn         | 1608558.567 | 115227.4148 | 7.163395673 |
| UIJ65707.1 | carbonic_anhydrase_[Bacillus_cereus]                      | CPTF_Ni         | 1512121.4   | 105229.5989 | 6.959070807 |
| UIJ65707.1 | carbonic_anhydrase_[Bacillus_cereus]                      | CPTF_U          | 1513221.867 | 203188.994  | 13.42757453 |
| UIJ65707.1 | carbonic_anhydrase_[Bacillus_cereus]                      | CPTF_metals_mix | 1715648.333 | 31385.14761 | 1.829346201 |
| UIJ65707.1 | carbonic_anhydrase_[Bacillus_cereus]                      | CPTF_zcontrol   | 1623263.4   | 93182.49727 | 5.740442203 |
| UIJ65712.1 | YitT_family_protein_[Bacillus_cereus]                     | CPTF_Al         | 11616.53333 | 20120.42594 | 173.2050808 |
| UIJ65712.1 | YitT_family_protein_[Bacillus_cereus]                     | CPTF_Cd         | 20084.2     | 18666.33178 | 92.94037992 |
| UIJ65712.1 | YitT_family_protein_[Bacillus_cereus]                     | CPTF_Co         | 38769.16667 | 4922.902007 | 12.69798252 |
| UIJ65712.1 | YitT_family_protein_[Bacillus_cereus]                     | CPTF_Cu         | 26122.96667 | 25632.22085 | 98.12140089 |
| UIJ65712.1 | YitT_family_protein_[Bacillus_cereus]                     | CPTF_Fe         | 0           | 0           | 0           |
| UIJ65712.1 | YitT_family_protein_[Bacillus_cereus]                     | CPTF_Mn         | 0           | 0           | 0           |
| UIJ65712.1 | YitT_family_protein_[Bacillus_cereus]                     | CPTF_Ni         | 8445        | 14627.16907 | 173.2050808 |
| UIJ65712.1 | YitT_family_protein_[Bacillus_cereus]                     | CPTF_U          | 0           | 0           | 0           |
| UIJ65712.1 | YitT_family_protein_[Bacillus_cereus]                     | CPTF_metals_mix | 36014.86667 | 21163.33228 | 58.76276727 |
| UIJ65712.1 | YitT_family_protein_[Bacillus_cereus]                     | CPTF_zcontrol   | 0           | 0           | 0           |
| UIJ65716.1 | PspA/IM30_family_protein_[Bacillus_cereus]                | CPTF_Al         | 1330422.5   | 96898.19667 | 7.283265029 |
| UIJ65716.1 | PspA/IM30_family_protein_[Bacillus_cereus]                | CPTF_Cd         | 1510402     | 168182.2641 | 11.13493389 |
| UIJ65716.1 | PspA/IM30_family_protein_[Bacillus_cereus]                | CPTF_Co         | 1268927.9   | 86681.36575 | 6.831070997 |
| UIJ65716.1 | PspA/IM30_family_protein_[Bacillus_cereus]                | CPTF_Cu         | 1762695.2   | 119045.3176 | 6.753596287 |
| UIJ65716.1 | PspA/IM30_family_protein_[Bacillus_cereus]                | CPTF_Fe         | 831513.3333 | 721378.313  | 86.7548702  |
| UIJ65716.1 | PspA/IM30_family_protein_[Bacillus_cereus]                | CPTF_Mn         | 1307880     | 124490.3649 | 9.518485251 |
| UIJ65716.1 | PspA/IM30_family_protein_[Bacillus_cereus]                | CPTF_Ni         | 1091353.967 | 168266.9853 | 15.41818607 |
| UIJ65716.1 | PspA/IM30_family_protein_[Bacillus_cereus]                | CPTF_U          | 892477.3333 | 99314.06326 | 11.12790875 |
| UIJ65716.1 | PspA/IM30_family_protein_[Bacillus_cereus]                | CPTF_metals_mix | 3565373.2   | 228834.3864 | 6.418244979 |
| UIJ65716.1 | PspA/IM30_family_protein_[Bacillus_cereus]                | CPTF_zcontrol   | 717662.1    | 621523.5034 | 86.60391895 |
| UIJ65728.1 | hypoxanthine_phosphoribosyltransferase_[Bacillus_cereus]  | CPTF_Al         | 313825.4667 | 121656.8324 | 38.76576164 |
| UIJ65728.1 | hypoxanthine_phosphoribosyltransferase_[Bacillus_cereus]  | CPTF_Cd         | 307913.0333 | 61725.38524 | 20.04636977 |
| UIJ65728.1 | hypoxanthine_phosphoribosyltransferase_[Bacillus_cereus]  | CPTF_Co         | 421831.6667 | 17404.55484 | 4.125947912 |
| UIJ65728.1 | hypoxanthine_phosphoribosyltransferase_[Bacillus_cereus]  | CPTF_Cu         | 551909.6667 | 162084.0857 | 29.36786497 |
| UIJ65728.1 | hypoxanthine_phosphoribosyltransferase_[Bacillus_cereus]  | CPTF_Fe         | 328897.4    | 45148.36572 | 13.72718839 |
| UIJ65728.1 | hypoxanthine_phosphoribosyltransferase_[Bacillus_cereus]  | CPTF_Mn         | 198362.1333 | 21666.23397 | 10.92256551 |
| UIJ65728.1 | hypoxanthine_phosphoribosyltransferase_[Bacillus_cereus]  | CPTF_Ni         | 234209      | 184643.7833 | 78.83718527 |
| UIJ65728.1 | hypoxanthine_phosphoribosyltransferase_[Bacillus_cereus]  | CPTF_U          | 137371.2667 | 237934.0134 | 173.2050808 |
| UIJ65728.1 | hypoxanthine_phosphoribosyltransferase_[Bacillus_cereus]  | CPTF_metals_mix | 492560.1667 | 49441.73766 | 10.03770524 |
| UIJ65728.1 | hypoxanthine_phosphoribosyltransferase_[Bacillus_cereus]  | CPTF_zcontrol   | 250018.3    | 10065.77406 | 4.026014919 |
| UIJ65729.1 | YegS/Rv2252/BmrU_family_lipid_kinase_[Bacillus_cereus]    | CPTF_Al         | 0           | 0           | 0           |
| UIJ65729.1 | YegS/Rv2252/BmrU_family_lipid_kinase_[Bacillus_cereus]    | CPTF_Cd         | 0           | 0           | 0           |
| UIJ65729.1 | YegS/Rv2252/BmrU_family_lipid_kinase_[Bacillus_cereus]    | CPTF_Co         | 0           | 0           | 0           |
| UIJ65729.1 | YegS/Rv2252/BmrU_family_lipid_kinase_[Bacillus_cereus]    | CPTF_Cu         | 0           | 0           | 0           |
| UIJ65729.1 | YegS/Rv2252/BmrU_family_lipid_kinase_[Bacillus_cereus]    | CPTF_Fe         | 0           | 0           | 0           |
| UIJ65729.1 | YegS/Rv2252/BmrU_family_lipid_kinase_[Bacillus_cereus]    | CPTF_Mn         | 14108.2     | 24436.1192  | 173.2050808 |
| UIJ65729.1 | YegS/Rv2252/BmrU_family_lipid_kinase_[Bacillus_cereus]    | CPTF_Ni         | 0           | 0           | 0           |
| UIJ65729.1 | YegS/Rv2252/BmrU_family_lipid_kinase_[Bacillus_cereus]    | CPTF_U          | 0           | 0           | 0           |
| UIJ65729.1 | YegS/Rv2252/BmrU_family_lipid_kinase_[Bacillus_cereus]    | CPTF_metals_mix | 183205.4333 | 59276.34447 | 32.35512364 |
| UIJ65729.1 | YegS/Rv2252/BmrU_family_lipid_kinase_[Bacillus_cereus]    | CPTF_zcontrol   | 0           | 0           | 0           |
| UIJ65744.1 | response_regulator_transcription_factor_[Bacillus_cereus] | CPTF_Al         | 220993.8    | 19238.94307 | 8.705648336 |
| UIJ65744.1 | response_regulator_transcription_factor_[Bacillus_cereus] | CPTF_Cd         | 277267.2667 | 55253.01048 | 19.92770771 |
| UIJ65744.1 | response_regulator_transcription_factor_[Bacillus_cereus] | CPTF_Co         | 229651.9    | 26924.38823 | 11.72399977 |
| UIJ65744.1 | response_regulator_transcription_factor_[Bacillus_cereus] | CPTF_Cu         | 190746      | 18142.61858 | 9.511401855 |
| UIJ65744.1 | response_regulator_transcription_factor_[Bacillus_cereus] | CPTF_Fe         | 197874      | 36539.19779 | 18.46589132 |
| UIJ65744.1 | response_regulator_transcription_factor_[Bacillus_cereus] | CPTF_Mn         | 260739.6667 | 70431.93377 | 27.0123586  |
| UIJ65744.1 | response_regulator_transcription_factor_[Bacillus_cereus] | CPTF_Ni         | 244224      | 68424.63247 | 28.01716149 |
| UIJ65744.1 | response_regulator_transcription_factor_[Bacillus_cereus] | CPTF_U          | 232616.2333 | 34459.61072 | 14.81393204 |
| UIJ65744.1 | response_regulator_transcription_factor_[Bacillus_cereus] | CPTF_metals_mix | 396235.3    | 221421.781  | 55.88138688 |
| UIJ65744.1 | response_regulator_transcription_factor_[Bacillus_cereus] | CPTF_zcontrol   | 84387.8     | 54061.42693 | 64.06308369 |
| UIJ65748.1 | ABC_transporter_ATP-binding_protein_[Bacillus_cereus]     | CPTF_Al         | 0           | 0           | 0           |
| UIJ65748.1 | ABC_transporter_ATP-binding_protein_[Bacillus_cereus]     | CPTF_Cd         | 0           | 0           | 0           |
| UIJ65748.1 | ABC_transporter_ATP-binding_protein_[Bacillus_cereus]     | CPTF_Co         | 29491.63333 | 51081.00733 | 173.2050808 |

|            |                                                                        |                 |             |             |             |
|------------|------------------------------------------------------------------------|-----------------|-------------|-------------|-------------|
| UIJ65748.1 | ABC_transporter_ATP-binding_protein_[Bacillus_cereus]                  | CPTF_Cu         | 0           | 0           | 0           |
| UIJ65748.1 | ABC_transporter_ATP-binding_protein_[Bacillus_cereus]                  | CPTF_Fe         | 47069.33333 | 81526.47681 | 173.2050808 |
| UIJ65748.1 | ABC_transporter_ATP-binding_protein_[Bacillus_cereus]                  | CPTF_Mn         | 0           | 0           | 0           |
| UIJ65748.1 | ABC_transporter_ATP-binding_protein_[Bacillus_cereus]                  | CPTF_Ni         | 0           | 0           | 0           |
| UIJ65748.1 | ABC_transporter_ATP-binding_protein_[Bacillus_cereus]                  | CPTF_U          | 57033       | 98784.05371 | 173.2050808 |
| UIJ65748.1 | ABC_transporter_ATP-binding_protein_[Bacillus_cereus]                  | CPTF_metals_mix | 14148.56667 | 24506.03632 | 173.2050808 |
| UIJ65748.1 | ABC_transporter_ATP-binding_protein_[Bacillus_cereus]                  | CPTF_zcontrol   | 0           | 0           | 0           |
| UIJ65763.1 | 1,4-dihydroxy-2-naphthoyl-CoA_synthase_[Bacillus_cereus]               | CPTF_Al         | 3836326.233 | 281524.5931 | 7.338390325 |
| UIJ65763.1 | 1,4-dihydroxy-2-naphthoyl-CoA_synthase_[Bacillus_cereus]               | CPTF_Cd         | 4128573.033 | 342981.5497 | 8.307508355 |
| UIJ65763.1 | 1,4-dihydroxy-2-naphthoyl-CoA_synthase_[Bacillus_cereus]               | CPTF_Co         | 3716986.333 | 263552.6263 | 7.090492207 |
| UIJ65763.1 | 1,4-dihydroxy-2-naphthoyl-CoA_synthase_[Bacillus_cereus]               | CPTF_Cu         | 4164463     | 402339.3945 | 9.661255114 |
| UIJ65763.1 | 1,4-dihydroxy-2-naphthoyl-CoA_synthase_[Bacillus_cereus]               | CPTF_Fe         | 4119217.467 | 209623.4972 | 5.088915527 |
| UIJ65763.1 | 1,4-dihydroxy-2-naphthoyl-CoA_synthase_[Bacillus_cereus]               | CPTF_Mn         | 3920565.233 | 788689.6973 | 20.11673446 |
| UIJ65763.1 | 1,4-dihydroxy-2-naphthoyl-CoA_synthase_[Bacillus_cereus]               | CPTF_Ni         | 4352458     | 612579.2985 | 14.07432992 |
| UIJ65763.1 | 1,4-dihydroxy-2-naphthoyl-CoA_synthase_[Bacillus_cereus]               | CPTF_U          | 5032066.667 | 228669.4054 | 4.544244354 |
| UIJ65763.1 | 1,4-dihydroxy-2-naphthoyl-CoA_synthase_[Bacillus_cereus]               | CPTF_metals_mix | 4191234.933 | 634287.8753 | 15.13367505 |
| UIJ65763.1 | 1,4-dihydroxy-2-naphthoyl-CoA_synthase_[Bacillus_cereus]               | CPTF_zcontrol   | 4455204.667 | 411451.3136 | 9.235295444 |
| UIJ65769.1 | cold-shock_protein_CspD_[Bacillus_cereus]                              | CPTF_Al         | 2237795     | 471215.4878 | 21.05713382 |
| UIJ65769.1 | cold-shock_protein_CspD_[Bacillus_cereus]                              | CPTF_Cd         | 3938351.667 | 295996.2955 | 7.515740608 |
| UIJ65769.1 | cold-shock_protein_CspD_[Bacillus_cereus]                              | CPTF_Co         | 3191880.733 | 495082.7054 | 15.51068936 |
| UIJ65769.1 | cold-shock_protein_CspD_[Bacillus_cereus]                              | CPTF_Cu         | 3287072.733 | 173432.2227 | 5.276190603 |
| UIJ65769.1 | cold-shock_protein_CspD_[Bacillus_cereus]                              | CPTF_Fe         | 3012218.2   | 692864.1652 | 23.00179201 |
| UIJ65769.1 | cold-shock_protein_CspD_[Bacillus_cereus]                              | CPTF_Mn         | 2713657.933 | 1503302.652 | 55.39764733 |
| UIJ65769.1 | cold-shock_protein_CspD_[Bacillus_cereus]                              | CPTF_Ni         | 2905153.667 | 271473.5475 | 9.344550361 |
| UIJ65769.1 | cold-shock_protein_CspD_[Bacillus_cereus]                              | CPTF_U          | 3501001.667 | 501032.8909 | 14.31112974 |
| UIJ65769.1 | cold-shock_protein_CspD_[Bacillus_cereus]                              | CPTF_metals_mix | 8086359.667 | 514344.6393 | 6.360645093 |
| UIJ65769.1 | cold-shock_protein_CspD_[Bacillus_cereus]                              | CPTF_zcontrol   | 1660551.7   | 58818.29324 | 3.542093464 |
| UIJ65770.1 | TIGR00266_family_protein_[Bacillus_cereus]                             | CPTF_Al         | 984540      | 57718.02807 | 5.862436068 |
| UIJ65770.1 | TIGR00266_family_protein_[Bacillus_cereus]                             | CPTF_Cd         | 1005486.667 | 59778.84687 | 5.945265    |
| UIJ65770.1 | TIGR00266_family_protein_[Bacillus_cereus]                             | CPTF_Co         | 957887      | 125108.5223 | 13.0608853  |
| UIJ65770.1 | TIGR00266_family_protein_[Bacillus_cereus]                             | CPTF_Cu         | 814097.3333 | 9208.809605 | 1.131168133 |
| UIJ65770.1 | TIGR00266_family_protein_[Bacillus_cereus]                             | CPTF_Fe         | 1012992.333 | 117771.313  | 11.62608138 |
| UIJ65770.1 | TIGR00266_family_protein_[Bacillus_cereus]                             | CPTF_Mn         | 920797      | 204589.6112 | 22.21875301 |
| UIJ65770.1 | TIGR00266_family_protein_[Bacillus_cereus]                             | CPTF_Ni         | 554676.3333 | 118425.223  | 21.35032917 |
| UIJ65770.1 | TIGR00266_family_protein_[Bacillus_cereus]                             | CPTF_U          | 780062      | 96664.77155 | 12.39193443 |
| UIJ65770.1 | TIGR00266_family_protein_[Bacillus_cereus]                             | CPTF_metals_mix | 1001441.567 | 27127.9818  | 2.70889313  |
| UIJ65770.1 | TIGR00266_family_protein_[Bacillus_cereus]                             | CPTF_zcontrol   | 1014055     | 172649.0511 | 17.02561016 |
| UIJ65773.1 | glycogen_phosphorylase_[Bacillus_cereus]                               | CPTF_Al         | 1919681.967 | 339459.9335 | 17.68313394 |
| UIJ65773.1 | glycogen_phosphorylase_[Bacillus_cereus]                               | CPTF_Cd         | 1554204.333 | 468093.9474 | 30.11791547 |
| UIJ65773.1 | glycogen_phosphorylase_[Bacillus_cereus]                               | CPTF_Co         | 1827515.4   | 199019.837  | 10.89018659 |
| UIJ65773.1 | glycogen_phosphorylase_[Bacillus_cereus]                               | CPTF_Cu         | 886169.8    | 306707.4585 | 34.61046162 |
| UIJ65773.1 | glycogen_phosphorylase_[Bacillus_cereus]                               | CPTF_Fe         | 1437957.1   | 689546.6329 | 47.95321313 |
| UIJ65773.1 | glycogen_phosphorylase_[Bacillus_cereus]                               | CPTF_Mn         | 1564786.667 | 631498.5444 | 40.35684595 |
| UIJ65773.1 | glycogen_phosphorylase_[Bacillus_cereus]                               | CPTF_Ni         | 1936291.5   | 248025.2311 | 12.80929194 |
| UIJ65773.1 | glycogen_phosphorylase_[Bacillus_cereus]                               | CPTF_U          | 1169693.8   | 700876.8269 | 59.91968384 |
| UIJ65773.1 | glycogen_phosphorylase_[Bacillus_cereus]                               | CPTF_metals_mix | 768608.1    | 137464.9993 | 17.88492722 |
| UIJ65773.1 | glycogen_phosphorylase_[Bacillus_cereus]                               | CPTF_zcontrol   | 2163059.767 | 155248.5933 | 7.172726755 |
| UIJ65774.1 | glucose-1-phosphate_adenylyltransferase_subunit_GlgD_[Bacillus_cereus] | CPTF_Al         | 5692313.733 | 190393.8165 | 3.344752686 |
| UIJ65774.1 | glucose-1-phosphate_adenylyltransferase_subunit_GlgD_[Bacillus_cereus] | CPTF_Cd         | 5114320.967 | 1864733.03  | 36.46100905 |
| UIJ65774.1 | glucose-1-phosphate_adenylyltransferase_subunit_GlgD_[Bacillus_cereus] | CPTF_Co         | 6071127.267 | 520964.4974 | 8.581017569 |
| UIJ65774.1 | glucose-1-phosphate_adenylyltransferase_subunit_GlgD_[Bacillus_cereus] | CPTF_Cu         | 4609707.633 | 493463.3219 | 10.70487244 |
| UIJ65774.1 | glucose-1-phosphate_adenylyltransferase_subunit_GlgD_[Bacillus_cereus] | CPTF_Fe         | 4944108.967 | 1893167.256 | 38.29137401 |
| UIJ65774.1 | glucose-1-phosphate_adenylyltransferase_subunit_GlgD_[Bacillus_cereus] | CPTF_Mn         | 5641758.933 | 851280.3696 | 15.08891783 |
| UIJ65774.1 | glucose-1-phosphate_adenylyltransferase_subunit_GlgD_[Bacillus_cereus] | CPTF_Ni         | 5647592.8   | 633791.1403 | 11.22232361 |
| UIJ65774.1 | glucose-1-phosphate_adenylyltransferase_subunit_GlgD_[Bacillus_cereus] | CPTF_U          | 5705800.833 | 517304.9316 | 9.066298434 |
| UIJ65774.1 | glucose-1-phosphate_adenylyltransferase_subunit_GlgD_[Bacillus_cereus] | CPTF_metals_mix | 2914083.767 | 458384.589  | 15.72997298 |
| UIJ65774.1 | glucose-1-phosphate_adenylyltransferase_subunit_GlgD_[Bacillus_cereus] | CPTF_zcontrol   | 5399932.633 | 847109.8201 | 15.6874146  |
| UIJ65775.1 | glucose-1-phosphate_adenylyltransferase_[Bacillus_cereus]              | CPTF_Al         | 6828725.333 | 201878.8088 | 2.956317598 |
| UIJ65775.1 | glucose-1-phosphate_adenylyltransferase_[Bacillus_cereus]              | CPTF_Cd         | 7513536.167 | 368923.6682 | 4.910120349 |
| UIJ65775.1 | glucose-1-phosphate_adenylyltransferase_[Bacillus_cereus]              | CPTF_Co         | 6397839.667 | 765927.1136 | 11.97165221 |
| UIJ65775.1 | glucose-1-phosphate_adenylyltransferase_[Bacillus_cereus]              | CPTF_Cu         | 4960447.367 | 59885.32114 | 1.207256457 |

|            |                                                           |                 |             |             |             |
|------------|-----------------------------------------------------------|-----------------|-------------|-------------|-------------|
| UIJ65775.1 | glucose-1-phosphate_adenylyltransferase_[Bacillus_cereus] | CPTF_Fe         | 6374882.2   | 187284.4996 | 2.93785036  |
| UIJ65775.1 | glucose-1-phosphate_adenylyltransferase_[Bacillus_cereus] | CPTF_Mn         | 7372247.967 | 714476.4859 | 9.691433185 |
| UIJ65775.1 | glucose-1-phosphate_adenylyltransferase_[Bacillus_cereus] | CPTF_Ni         | 5145902.533 | 231098.3099 | 4.490918908 |
| UIJ65775.1 | glucose-1-phosphate_adenylyltransferase_[Bacillus_cereus] | CPTF_U          | 5706485.333 | 418854.6965 | 7.339976747 |
| UIJ65775.1 | glucose-1-phosphate_adenylyltransferase_[Bacillus_cereus] | CPTF_metals_mix | 5070889.6   | 489303.2613 | 9.649258806 |
| UIJ65775.1 | glucose-1-phosphate_adenylyltransferase_[Bacillus_cereus] | CPTF_zcontrol   | 6576873.9   | 663336.0249 | 10.08588632 |
| UIJ65776.1 | 1,4-alpha-glucan_branching_protein_GlgB_[Bacillus_cereus] | CPTF_AI         | 1094035     | 142047.8672 | 12.98385035 |
| UIJ65776.1 | 1,4-alpha-glucan_branching_protein_GlgB_[Bacillus_cereus] | CPTF_Cd         | 1047301.067 | 46510.19345 | 4.440957327 |
| UIJ65776.1 | 1,4-alpha-glucan_branching_protein_GlgB_[Bacillus_cereus] | CPTF_Co         | 1078362.167 | 106869.5282 | 9.910355863 |
| UIJ65776.1 | 1,4-alpha-glucan_branching_protein_GlgB_[Bacillus_cereus] | CPTF_Cu         | 813431.9    | 22401.34836 | 2.753930398 |
| UIJ65776.1 | 1,4-alpha-glucan_branching_protein_GlgB_[Bacillus_cereus] | CPTF_Fe         | 1086330.4   | 45840.51093 | 4.219757721 |
| UIJ65776.1 | 1,4-alpha-glucan_branching_protein_GlgB_[Bacillus_cereus] | CPTF_Mn         | 906270.2    | 370554.0929 | 40.88781612 |
| UIJ65776.1 | 1,4-alpha-glucan_branching_protein_GlgB_[Bacillus_cereus] | CPTF_Ni         | 1034298.467 | 279962.1463 | 27.06782958 |
| UIJ65776.1 | 1,4-alpha-glucan_branching_protein_GlgB_[Bacillus_cereus] | CPTF_U          | 994952.3333 | 119330.8842 | 4.219757721 |
| UIJ65776.1 | 1,4-alpha-glucan_branching_protein_GlgB_[Bacillus_cereus] | CPTF_metals_mix | 430857.1333 | 110843.2601 | 25.72622141 |
| UIJ65776.1 | 1,4-alpha-glucan_branching_protein_GlgB_[Bacillus_cereus] | CPTF_zcontrol   | 1007879.233 | 232711.9674 | 23.08927099 |
| UIJ65777.1 | CalY_family_protein_[Bacillus_cereus]                     | CPTF_AI         | 0           | 0           | 0           |
| UIJ65777.1 | CalY_family_protein_[Bacillus_cereus]                     | CPTF_Cd         | 15606.56667 | 27031.3664  | 173.2050808 |
| UIJ65777.1 | CalY_family_protein_[Bacillus_cereus]                     | CPTF_Co         | 80092.26667 | 110707.2415 | 138.2246328 |
| UIJ65777.1 | CalY_family_protein_[Bacillus_cereus]                     | CPTF_Cu         | 0           | 0           | 0           |
| UIJ65777.1 | CalY_family_protein_[Bacillus_cereus]                     | CPTF_Fe         | 69919.2     | 87913.51344 | 125.7358686 |
| UIJ65777.1 | CalY_family_protein_[Bacillus_cereus]                     | CPTF_Mn         | 30202.5     | 26539.82322 | 87.87293509 |
| UIJ65777.1 | CalY_family_protein_[Bacillus_cereus]                     | CPTF_Ni         | 0           | 0           | 0           |
| UIJ65777.1 | CalY_family_protein_[Bacillus_cereus]                     | CPTF_U          | 0           | 0           | 0           |
| UIJ65777.1 | CalY_family_protein_[Bacillus_cereus]                     | CPTF_metals_mix | 0           | 0           | 0           |
| UIJ65777.1 | CalY_family_protein_[Bacillus_cereus]                     | CPTF_zcontrol   | 0           | 0           | 0           |
| UIJ65779.1 | L-lactate_dehydrogenase_[Bacillus_cereus]                 | CPTF_AI         | 3342654     | 379727.3523 | 11.36005558 |
| UIJ65779.1 | L-lactate_dehydrogenase_[Bacillus_cereus]                 | CPTF_Cd         | 4727064.6   | 399383.6529 | 8.448872327 |
| UIJ65779.1 | L-lactate_dehydrogenase_[Bacillus_cereus]                 | CPTF_Co         | 3615560.667 | 632455.1755 | 17.49258922 |
| UIJ65779.1 | L-lactate_dehydrogenase_[Bacillus_cereus]                 | CPTF_Cu         | 3368806.767 | 647366.3749 | 19.2164888  |
| UIJ65779.1 | L-lactate_dehydrogenase_[Bacillus_cereus]                 | CPTF_Fe         | 4353760     | 747488.983  | 17.16881461 |
| UIJ65779.1 | L-lactate_dehydrogenase_[Bacillus_cereus]                 | CPTF_Mn         | 3337236.333 | 424127.5572 | 12.70894581 |
| UIJ65779.1 | L-lactate_dehydrogenase_[Bacillus_cereus]                 | CPTF_Ni         | 2386022.7   | 411486.4008 | 17.24570352 |
| UIJ65779.1 | L-lactate_dehydrogenase_[Bacillus_cereus]                 | CPTF_U          | 2620610.333 | 779213.9139 | 29.73406248 |
| UIJ65779.1 | L-lactate_dehydrogenase_[Bacillus_cereus]                 | CPTF_metals_mix | 4587443.267 | 347497.109  | 7.57496254  |
| UIJ65779.1 | L-lactate_dehydrogenase_[Bacillus_cereus]                 | CPTF_zcontrol   | 2322801     | 62847.98122 | 2.705698044 |
| UIJ65783.1 | glucose-6-phosphate_isomerase_[Bacillus_cereus]           | CPTF_AI         | 33590478.63 | 684707.3029 | 2.038396982 |
| UIJ65783.1 | glucose-6-phosphate_isomerase_[Bacillus_cereus]           | CPTF_Cd         | 34794131.93 | 337551.6436 | 0.970139575 |
| UIJ65783.1 | glucose-6-phosphate_isomerase_[Bacillus_cereus]           | CPTF_Co         | 34672155.47 | 332951.8571 | 0.960286007 |
| UIJ65783.1 | glucose-6-phosphate_isomerase_[Bacillus_cereus]           | CPTF_Cu         | 34088236.27 | 423907.4359 | 1.243559311 |
| UIJ65783.1 | glucose-6-phosphate_isomerase_[Bacillus_cereus]           | CPTF_Fe         | 33604816.53 | 1066741.498 | 3.174370844 |
| UIJ65783.1 | glucose-6-phosphate_isomerase_[Bacillus_cereus]           | CPTF_Mn         | 34013773.37 | 1417004.691 | 4.165973225 |
| UIJ65783.1 | glucose-6-phosphate_isomerase_[Bacillus_cereus]           | CPTF_Ni         | 31507382.6  | 741987.0044 | 2.354962371 |
| UIJ65783.1 | glucose-6-phosphate_isomerase_[Bacillus_cereus]           | CPTF_U          | 32711085.8  | 1222559.086 | 3.737445748 |
| UIJ65783.1 | glucose-6-phosphate_isomerase_[Bacillus_cereus]           | CPTF_metals_mix | 36540613.5  | 1253344.808 | 3.430004829 |
| UIJ65783.1 | glucose-6-phosphate_isomerase_[Bacillus_cereus]           | CPTF_zcontrol   | 34015856.67 | 717525.93   | 2.109386622 |
| UIJ65786.1 | aminotransferase_[Bacillus_cereus]                        | CPTF_AI         | 0           | 0           | 0           |
| UIJ65786.1 | aminotransferase_[Bacillus_cereus]                        | CPTF_Cd         | 0           | 0           | 0           |
| UIJ65786.1 | aminotransferase_[Bacillus_cereus]                        | CPTF_Co         | 0           | 0           | 0           |
| UIJ65786.1 | aminotransferase_[Bacillus_cereus]                        | CPTF_Cu         | 0           | 0           | 0           |
| UIJ65786.1 | aminotransferase_[Bacillus_cereus]                        | CPTF_Fe         | 0           | 0           | 0           |
| UIJ65786.1 | aminotransferase_[Bacillus_cereus]                        | CPTF_Mn         | 0           | 0           | 0           |
| UIJ65786.1 | aminotransferase_[Bacillus_cereus]                        | CPTF_Ni         | 0           | 0           | 0           |
| UIJ65786.1 | aminotransferase_[Bacillus_cereus]                        | CPTF_U          | 0           | 0           | 0           |
| UIJ65786.1 | aminotransferase_[Bacillus_cereus]                        | CPTF_metals_mix | 61819.46667 | 34842.24138 | 56.36127787 |
| UIJ65786.1 | aminotransferase_[Bacillus_cereus]                        | CPTF_zcontrol   | 0           | 0           | 0           |
| UIJ65788.1 | D-glycerate_dehydrogenase_[Bacillus_cereus]               | CPTF_AI         | 333103      | 27370.29779 | 8.216767122 |
| UIJ65788.1 | D-glycerate_dehydrogenase_[Bacillus_cereus]               | CPTF_Cd         | 201606.6667 | 175133.636  | 86.86897062 |
| UIJ65788.1 | D-glycerate_dehydrogenase_[Bacillus_cereus]               | CPTF_Co         | 276785      | 15006.06451 | 5.421559878 |
| UIJ65788.1 | D-glycerate_dehydrogenase_[Bacillus_cereus]               | CPTF_Cu         | 290857      | 17608.82367 | 6.054117202 |
| UIJ65788.1 | D-glycerate_dehydrogenase_[Bacillus_cereus]               | CPTF_Fe         | 335043      | 35160.29532 | 10.49426352 |

|            |                                                                  |                 |             |             |             |
|------------|------------------------------------------------------------------|-----------------|-------------|-------------|-------------|
| UIJ65788.1 | D-glycerate_dehydrogenase_[Bacillus_cereus]                      | CPTF_Mn         | 191839.6667 | 173095.9264 | 90.22947624 |
| UIJ65788.1 | D-glycerate_dehydrogenase_[Bacillus_cereus]                      | CPTF_Ni         | 327235      | 34759.31333 | 10.62212579 |
| UIJ65788.1 | D-glycerate_dehydrogenase_[Bacillus_cereus]                      | CPTF_U          | 335527.3333 | 14946.035   | 4.454491041 |
| UIJ65788.1 | D-glycerate_dehydrogenase_[Bacillus_cereus]                      | CPTF_metals_mix | 247830.6667 | 37630.75094 | 15.1840575  |
| UIJ65788.1 | D-glycerate_dehydrogenase_[Bacillus_cereus]                      | CPTF_zcontrol   | 314181.3333 | 23514.61253 | 7.484407899 |
| UIJ65791.1 | pyridoxal_phosphate-dependent_aminotransferase_[Bacillus_cereus] | CPTF_Al         | 0           | 0           | 0           |
| UIJ65791.1 | pyridoxal_phosphate-dependent_aminotransferase_[Bacillus_cereus] | CPTF_Cd         | 41738.66667 | 72293.49131 | 173.2050808 |
| UIJ65791.1 | pyridoxal_phosphate-dependent_aminotransferase_[Bacillus_cereus] | CPTF_Co         | 73140.53333 | 68744.46664 | 93.98956161 |
| UIJ65791.1 | pyridoxal_phosphate-dependent_aminotransferase_[Bacillus_cereus] | CPTF_Cu         | 0           | 0           | 0           |
| UIJ65791.1 | pyridoxal_phosphate-dependent_aminotransferase_[Bacillus_cereus] | CPTF_Fe         | 0           | 0           | 0           |
| UIJ65791.1 | pyridoxal_phosphate-dependent_aminotransferase_[Bacillus_cereus] | CPTF_Mn         | 0           | 0           | 0           |
| UIJ65791.1 | pyridoxal_phosphate-dependent_aminotransferase_[Bacillus_cereus] | CPTF_Ni         | 0           | 0           | 0           |
| UIJ65791.1 | pyridoxal_phosphate-dependent_aminotransferase_[Bacillus_cereus] | CPTF_U          | 0           | 0           | 0           |
| UIJ65791.1 | pyridoxal_phosphate-dependent_aminotransferase_[Bacillus_cereus] | CPTF_metals_mix | 70522.43333 | 72098.03221 | 102.2341811 |
| UIJ65791.1 | pyridoxal_phosphate-dependent_aminotransferase_[Bacillus_cereus] | CPTF_zcontrol   | 118286.3333 | 204877.9392 | 173.2050808 |
| UIJ65794.1 | kinase-associated_protein_B_[Bacillus_cereus]                    | CPTF_Al         | 134989.1667 | 63828.58951 | 47.28423109 |
| UIJ65794.1 | kinase-associated_protein_B_[Bacillus_cereus]                    | CPTF_Cd         | 132364.8333 | 30740.7435  | 23.22425279 |
| UIJ65794.1 | kinase-associated_protein_B_[Bacillus_cereus]                    | CPTF_Co         | 113034.2    | 21023.25945 | 18.5990253  |
| UIJ65794.1 | kinase-associated_protein_B_[Bacillus_cereus]                    | CPTF_Cu         | 193118.3    | 95525.56724 | 49.46479295 |
| UIJ65794.1 | kinase-associated_protein_B_[Bacillus_cereus]                    | CPTF_Fe         | 88776.53333 | 10400.98781 | 11.71592021 |
| UIJ65794.1 | kinase-associated_protein_B_[Bacillus_cereus]                    | CPTF_Mn         | 67779.46667 | 22038.17933 | 32.51453635 |
| UIJ65794.1 | kinase-associated_protein_B_[Bacillus_cereus]                    | CPTF_Ni         | 138909.9333 | 45127.20063 | 32.48666208 |
| UIJ65794.1 | kinase-associated_protein_B_[Bacillus_cereus]                    | CPTF_U          | 59291.1     | 51351.60776 | 86.60930183 |
| UIJ65794.1 | kinase-associated_protein_B_[Bacillus_cereus]                    | CPTF_metals_mix | 80661.06667 | 49504.20606 | 61.3731111  |
| UIJ65794.1 | kinase-associated_protein_B_[Bacillus_cereus]                    | CPTF_zcontrol   | 96382.33333 | 54241.06604 | 56.27697957 |
| UIJ65798.1 | DNA_alkylation_repair_protein_[Bacillus_cereus]                  | CPTF_Al         | 205673.3333 | 196536.0849 | 95.55739759 |
| UIJ65798.1 | DNA_alkylation_repair_protein_[Bacillus_cereus]                  | CPTF_Cd         | 110954.1333 | 121430.6597 | 109.4422137 |
| UIJ65798.1 | DNA_alkylation_repair_protein_[Bacillus_cereus]                  | CPTF_Co         | 244523      | 235604.0014 | 96.35249095 |
| UIJ65798.1 | DNA_alkylation_repair_protein_[Bacillus_cereus]                  | CPTF_Cu         | 493998      | 285005.217  | 57.69359735 |
| UIJ65798.1 | DNA_alkylation_repair_protein_[Bacillus_cereus]                  | CPTF_Fe         | 75967       | 131578.7037 | 173.2050808 |
| UIJ65798.1 | DNA_alkylation_repair_protein_[Bacillus_cereus]                  | CPTF_Mn         | 190502.3333 | 235356.0713 | 123.5449809 |
| UIJ65798.1 | DNA_alkylation_repair_protein_[Bacillus_cereus]                  | CPTF_Ni         | 67723       | 117299.6768 | 173.2050808 |
| UIJ65798.1 | DNA_alkylation_repair_protein_[Bacillus_cereus]                  | CPTF_U          | 251266.8667 | 277769.919  | 110.5477704 |
| UIJ65798.1 | DNA_alkylation_repair_protein_[Bacillus_cereus]                  | CPTF_metals_mix | 254283.3333 | 93733.71376 | 36.86191797 |
| UIJ65798.1 | DNA_alkylation_repair_protein_[Bacillus_cereus]                  | CPTF_zcontrol   | 412672      | 262033.3789 | 63.49676713 |
| UIJ65799.1 | glycine--tRNA_ligase_[Bacillus_cereus]                           | CPTF_Al         | 5545101.233 | 298454.2897 | 5.382305518 |
| UIJ65799.1 | glycine--tRNA_ligase_[Bacillus_cereus]                           | CPTF_Cd         | 4711303.2   | 202680.952  | 4.302014609 |
| UIJ65799.1 | glycine--tRNA_ligase_[Bacillus_cereus]                           | CPTF_Co         | 6106091.133 | 588387.5811 | 9.636075981 |
| UIJ65799.1 | glycine--tRNA_ligase_[Bacillus_cereus]                           | CPTF_Cu         | 4889258.167 | 726650.3098 | 14.86217919 |
| UIJ65799.1 | glycine--tRNA_ligase_[Bacillus_cereus]                           | CPTF_Fe         | 5561986.467 | 886428.9259 | 15.93727225 |
| UIJ65799.1 | glycine--tRNA_ligase_[Bacillus_cereus]                           | CPTF_Mn         | 5007652.1   | 486381.3021 | 9.712761438 |
| UIJ65799.1 | glycine--tRNA_ligase_[Bacillus_cereus]                           | CPTF_Ni         | 5428976     | 300859.3748 | 5.541733373 |
| UIJ65799.1 | glycine--tRNA_ligase_[Bacillus_cereus]                           | CPTF_U          | 4485071.033 | 1138549.077 | 25.38530759 |
| UIJ65799.1 | glycine--tRNA_ligase_[Bacillus_cereus]                           | CPTF_metals_mix | 4117342.133 | 105388.7683 | 2.559631065 |
| UIJ65799.1 | glycine--tRNA_ligase_[Bacillus_cereus]                           | CPTF_zcontrol   | 4344798.167 | 373786.6425 | 8.603084151 |
| UIJ65800.1 | hotdog_fold_thioesterase_[Bacillus_cereus]                       | CPTF_Al         | 52655.33333 | 91201.71262 | 173.2050808 |
| UIJ65800.1 | hotdog_fold_thioesterase_[Bacillus_cereus]                       | CPTF_Cd         | 170411.3333 | 55991.42199 | 32.85663042 |
| UIJ65800.1 | hotdog_fold_thioesterase_[Bacillus_cereus]                       | CPTF_Co         | 122454.6333 | 63791.4173  | 52.09391884 |
| UIJ65800.1 | hotdog_fold_thioesterase_[Bacillus_cereus]                       | CPTF_Cu         | 389672.3333 | 47981.36072 | 12.31325825 |
| UIJ65800.1 | hotdog_fold_thioesterase_[Bacillus_cereus]                       | CPTF_Fe         | 88991       | 77965.30019 | 87.61032035 |
| UIJ65800.1 | hotdog_fold_thioesterase_[Bacillus_cereus]                       | CPTF_Mn         | 130595.2333 | 47833.55593 | 36.62733678 |
| UIJ65800.1 | hotdog_fold_thioesterase_[Bacillus_cereus]                       | CPTF_Ni         | 192918.6667 | 167091.3797 | 86.61234423 |
| UIJ65800.1 | hotdog_fold_thioesterase_[Bacillus_cereus]                       | CPTF_U          | 176750.3333 | 57970.59872 | 32.7980138  |
| UIJ65800.1 | hotdog_fold_thioesterase_[Bacillus_cereus]                       | CPTF_metals_mix | 713424.9    | 25997.50633 | 3.644042467 |
| UIJ65800.1 | hotdog_fold_thioesterase_[Bacillus_cereus]                       | CPTF_zcontrol   | 237055      | 71497.31531 | 30.16064428 |
| UIJ65803.1 | phospho-sugar_mutase_[Bacillus_cereus]                           | CPTF_Al         | 5173791.167 | 467055.0273 | 9.02732662  |
| UIJ65803.1 | phospho-sugar_mutase_[Bacillus_cereus]                           | CPTF_Cd         | 5098952.633 | 1118527.728 | 21.93642123 |
| UIJ65803.1 | phospho-sugar_mutase_[Bacillus_cereus]                           | CPTF_Co         | 5445048.067 | 324248.9319 | 5.954932408 |
| UIJ65803.1 | phospho-sugar_mutase_[Bacillus_cereus]                           | CPTF_Cu         | 6040567.567 | 150393.7154 | 2.48972822  |
| UIJ65803.1 | phospho-sugar_mutase_[Bacillus_cereus]                           | CPTF_Fe         | 4953257.967 | 793628.2243 | 16.02234791 |
| UIJ65803.1 | phospho-sugar_mutase_[Bacillus_cereus]                           | CPTF_Mn         | 5295248.5   | 586501.167  | 11.07598948 |

|            |                                                                  |                 |             |             |              |
|------------|------------------------------------------------------------------|-----------------|-------------|-------------|--------------|
| UIJ65803.1 | phospho-sugar_mutase_[Bacillus_cereus]                           | CPTF_Ni         | 4785199.2   | 53850.40344 | 1.125353432  |
| UIJ65803.1 | phospho-sugar_mutase_[Bacillus_cereus]                           | CPTF_U          | 5378440.067 | 729723.7098 | 13.56757165  |
| UIJ65803.1 | phospho-sugar_mutase_[Bacillus_cereus]                           | CPTF_metals_mix | 6464716.833 | 102077.1524 | 1.578988764  |
| UIJ65803.1 | phospho-sugar_mutase_[Bacillus_cereus]                           | CPTF_zcontrol   | 4728471.767 | 582856.8625 | 12.32653786  |
| UIJ65809.1 | cytosol_aminopeptidase_[Bacillus_cereus]                         | CPTF_Al         | 6716226.533 | 897905.2554 | 13.36919252  |
| UIJ65809.1 | cytosol_aminopeptidase_[Bacillus_cereus]                         | CPTF_Cd         | 8403714.833 | 582023.0049 | 6.925782424  |
| UIJ65809.1 | cytosol_aminopeptidase_[Bacillus_cereus]                         | CPTF_Co         | 6254440.733 | 551237.9057 | 8.813544315  |
| UIJ65809.1 | cytosol_aminopeptidase_[Bacillus_cereus]                         | CPTF_Cu         | 6599838.833 | 409663.0722 | 6.207167819  |
| UIJ65809.1 | cytosol_aminopeptidase_[Bacillus_cereus]                         | CPTF_Fe         | 6363566.333 | 378227.4775 | 5.943640055  |
| UIJ65809.1 | cytosol_aminopeptidase_[Bacillus_cereus]                         | CPTF_Mn         | 6687566.633 | 1944157.303 | 29.07122141  |
| UIJ65809.1 | cytosol_aminopeptidase_[Bacillus_cereus]                         | CPTF_Ni         | 5897138.167 | 452481.1144 | 7.672893217  |
| UIJ65809.1 | cytosol_aminopeptidase_[Bacillus_cereus]                         | CPTF_U          | 5649515     | 441707.8163 | 7.818508603  |
| UIJ65809.1 | cytosol_aminopeptidase_[Bacillus_cereus]                         | CPTF_metals_mix | 10095359.3  | 595004.5435 | 5.893842168  |
| UIJ65809.1 | cytosol_aminopeptidase_[Bacillus_cereus]                         | CPTF_zcontrol   | 6054345.667 | 194123.9462 | 3.206357168  |
| UIJ65814.1 | NAD(P)/FAD-dependent_oxidoreductase_[Bacillus_cereus]            | CPTF_Al         | 1881183.667 | 74127.41721 | 3.940466767  |
| UIJ65814.1 | NAD(P)/FAD-dependent_oxidoreductase_[Bacillus_cereus]            | CPTF_Cd         | 1863630.667 | 154306.2143 | 8.279870957  |
| UIJ65814.1 | NAD(P)/FAD-dependent_oxidoreductase_[Bacillus_cereus]            | CPTF_Co         | 1960315     | 126886.6715 | 6.472769503  |
| UIJ65814.1 | NAD(P)/FAD-dependent_oxidoreductase_[Bacillus_cereus]            | CPTF_Cu         | 1810042.833 | 72980.3225  | 4.031966601  |
| UIJ65814.1 | NAD(P)/FAD-dependent_oxidoreductase_[Bacillus_cereus]            | CPTF_Fe         | 2044256.667 | 250139.5233 | 12.23620925  |
| UIJ65814.1 | NAD(P)/FAD-dependent_oxidoreductase_[Bacillus_cereus]            | CPTF_Mn         | 1869123     | 109217.7371 | 5.843261099  |
| UIJ65814.1 | NAD(P)/FAD-dependent_oxidoreductase_[Bacillus_cereus]            | CPTF_Ni         | 1867913.333 | 158679.0804 | 8.494991582  |
| UIJ65814.1 | NAD(P)/FAD-dependent_oxidoreductase_[Bacillus_cereus]            | CPTF_U          | 2173987.2   | 475638.0207 | 21.87860263  |
| UIJ65814.1 | NAD(P)/FAD-dependent_oxidoreductase_[Bacillus_cereus]            | CPTF_metals_mix | 1891606.7   | 78422.79439 | 4.145829806  |
| UIJ65814.1 | NAD(P)/FAD-dependent_oxidoreductase_[Bacillus_cereus]            | CPTF_zcontrol   | 1844051.233 | 97793.76066 | 5.303201934  |
| UIJ65816.1 | Gyrl-like_domain-containing_protein_[Bacillus_cereus]            | CPTF_Al         | 423294      | 71209.1607  | 16.82262463  |
| UIJ65816.1 | Gyrl-like_domain-containing_protein_[Bacillus_cereus]            | CPTF_Cd         | 387256.6667 | 36230.6414  | 9.355717931  |
| UIJ65816.1 | Gyrl-like_domain-containing_protein_[Bacillus_cereus]            | CPTF_Co         | 348531      | 24928.15621 | 7.152349779  |
| UIJ65816.1 | Gyrl-like_domain-containing_protein_[Bacillus_cereus]            | CPTF_Cu         | 425522.3333 | 41808.07626 | 9.825119149  |
| UIJ65816.1 | Gyrl-like_domain-containing_protein_[Bacillus_cereus]            | CPTF_Fe         | 332141.3333 | 46956.75556 | 14.137582666 |
| UIJ65816.1 | Gyrl-like_domain-containing_protein_[Bacillus_cereus]            | CPTF_Mn         | 366486.3333 | 120135.8352 | 32.78044072  |
| UIJ65816.1 | Gyrl-like_domain-containing_protein_[Bacillus_cereus]            | CPTF_Ni         | 440619.6667 | 31991.5744  | 7.260587036  |
| UIJ65816.1 | Gyrl-like_domain-containing_protein_[Bacillus_cereus]            | CPTF_U          | 405076.6667 | 217998.8962 | 53.81670042  |
| UIJ65816.1 | Gyrl-like_domain-containing_protein_[Bacillus_cereus]            | CPTF_metals_mix | 378026.2667 | 60685.46475 | 16.05324024  |
| UIJ65816.1 | Gyrl-like_domain-containing_protein_[Bacillus_cereus]            | CPTF_zcontrol   | 464816.6667 | 24103.20233 | 5.185528845  |
| UIJ65823.1 | iron-sulfur_cluster_assembly_accessory_protein_[Bacillus_cereus] | CPTF_Al         | 65774.53333 | 57868.30399 | 87.9798017   |
| UIJ65823.1 | iron-sulfur_cluster_assembly_accessory_protein_[Bacillus_cereus] | CPTF_Cd         | 110511      | 13322.26606 | 12.05514932  |
| UIJ65823.1 | iron-sulfur_cluster_assembly_accessory_protein_[Bacillus_cereus] | CPTF_Co         | 65652.16667 | 36191.40119 | 55.12598141  |
| UIJ65823.1 | iron-sulfur_cluster_assembly_accessory_protein_[Bacillus_cereus] | CPTF_Cu         | 81844.2     | 21961.99709 | 26.8339077   |
| UIJ65823.1 | iron-sulfur_cluster_assembly_accessory_protein_[Bacillus_cereus] | CPTF_Fe         | 94960.56667 | 29480.98191 | 31.04549914  |
| UIJ65823.1 | iron-sulfur_cluster_assembly_accessory_protein_[Bacillus_cereus] | CPTF_Mn         | 15482.23333 | 26816.01475 | 173.2050808  |
| UIJ65823.1 | iron-sulfur_cluster_assembly_accessory_protein_[Bacillus_cereus] | CPTF_Ni         | 13802.36667 | 23906.40033 | 173.2050808  |
| UIJ65823.1 | iron-sulfur_cluster_assembly_accessory_protein_[Bacillus_cereus] | CPTF_U          | 111122.8333 | 122218.2106 | 109.9847861  |
| UIJ65823.1 | iron-sulfur_cluster_assembly_accessory_protein_[Bacillus_cereus] | CPTF_metals_mix | 63443.56667 | 57502.5748  | 90.63578519  |
| UIJ65823.1 | iron-sulfur_cluster_assembly_accessory_protein_[Bacillus_cereus] | CPTF_zcontrol   | 53286.66667 | 5810.997148 | 10.90516167  |
| UIJ65824.1 | diaminopimelate_epimerase_[Bacillus_cereus]                      | CPTF_Al         | 576408.5667 | 26535.49068 | 4.603590614  |
| UIJ65824.1 | diaminopimelate_epimerase_[Bacillus_cereus]                      | CPTF_Cd         | 615144.3667 | 45513.53477 | 7.398837937  |
| UIJ65824.1 | diaminopimelate_epimerase_[Bacillus_cereus]                      | CPTF_Co         | 566226.9667 | 36437.29266 | 6.435103731  |
| UIJ65824.1 | diaminopimelate_epimerase_[Bacillus_cereus]                      | CPTF_Cu         | 564838.4667 | 93200.89759 | 16.50045156  |
| UIJ65824.1 | diaminopimelate_epimerase_[Bacillus_cereus]                      | CPTF_Fe         | 551864.8333 | 67294.84229 | 12.19408055  |
| UIJ65824.1 | diaminopimelate_epimerase_[Bacillus_cereus]                      | CPTF_Mn         | 507331.6667 | 79212.97258 | 15.61364641  |
| UIJ65824.1 | diaminopimelate_epimerase_[Bacillus_cereus]                      | CPTF_Ni         | 476971.8    | 54941.84683 | 11.51888787  |
| UIJ65824.1 | diaminopimelate_epimerase_[Bacillus_cereus]                      | CPTF_U          | 464385.4333 | 154565.324  | 33.28384417  |
| UIJ65824.1 | diaminopimelate_epimerase_[Bacillus_cereus]                      | CPTF_metals_mix | 696846.9333 | 47027.90673 | 6.748670975  |
| UIJ65824.1 | diaminopimelate_epimerase_[Bacillus_cereus]                      | CPTF_zcontrol   | 481634.6667 | 46932.26488 | 9.744370188  |
| UIJ65826.1 | NAD(P)/FAD-dependent_oxidoreductase_[Bacillus_cereus]            | CPTF_Al         | 2314460.333 | 46933.79966 | 2.027850682  |
| UIJ65826.1 | NAD(P)/FAD-dependent_oxidoreductase_[Bacillus_cereus]            | CPTF_Cd         | 2682091     | 101042.558  | 3.767305358  |
| UIJ65826.1 | NAD(P)/FAD-dependent_oxidoreductase_[Bacillus_cereus]            | CPTF_Co         | 1990890.333 | 414937.7694 | 20.84181948  |
| UIJ65826.1 | NAD(P)/FAD-dependent_oxidoreductase_[Bacillus_cereus]            | CPTF_Cu         | 2202792.167 | 431660.8802 | 19.59607841  |
| UIJ65826.1 | NAD(P)/FAD-dependent_oxidoreductase_[Bacillus_cereus]            | CPTF_Fe         | 2640222.1   | 399000.1775 | 15.1123717   |
| UIJ65826.1 | NAD(P)/FAD-dependent_oxidoreductase_[Bacillus_cereus]            | CPTF_Mn         | 2227323.633 | 489018.4921 | 21.95543049  |
| UIJ65826.1 | NAD(P)/FAD-dependent_oxidoreductase_[Bacillus_cereus]            | CPTF_Ni         | 2398010.733 | 424651.376  | 17.70848521  |

|            |                                                                    |                 |             |             |              |
|------------|--------------------------------------------------------------------|-----------------|-------------|-------------|--------------|
| UIJ65826.1 | NAD(P)/FAD-dependent oxidoreductase [Bacillus cereus]              | CPTF_U          | 2579780.967 | 357740.6469 | 13.86709382  |
| UIJ65826.1 | NAD(P)/FAD-dependent oxidoreductase [Bacillus cereus]              | CPTF_metals_mix | 1237809.367 | 135193.6855 | 10.92201183  |
| UIJ65826.1 | NAD(P)/FAD-dependent oxidoreductase [Bacillus cereus]              | CPTF_zcontrol   | 2497185.167 | 129568.8312 | 5.188595262  |
| UIJ65830.1 | alkylphosphonate utilization operon protein_PhnA [Bacillus cereus] | CPTF_Al         | 337609.6667 | 19542.29419 | 5.788428509  |
| UIJ65830.1 | alkylphosphonate utilization operon protein_PhnA [Bacillus cereus] | CPTF_Cd         | 328549      | 26211.61996 | 7.977994138  |
| UIJ65830.1 | alkylphosphonate utilization operon protein_PhnA [Bacillus cereus] | CPTF_Co         | 372826      | 25289.11108 | 6.783086769  |
| UIJ65830.1 | alkylphosphonate utilization operon protein_PhnA [Bacillus cereus] | CPTF_Cu         | 331606.6667 | 43014.44783 | 12.97152686  |
| UIJ65830.1 | alkylphosphonate utilization operon protein_PhnA [Bacillus cereus] | CPTF_Fe         | 365435.3333 | 31569.695   | 8.638927909  |
| UIJ65830.1 | alkylphosphonate utilization operon protein_PhnA [Bacillus cereus] | CPTF_Mn         | 312370.6667 | 64210.78277 | 20.55595791  |
| UIJ65830.1 | alkylphosphonate utilization operon protein_PhnA [Bacillus cereus] | CPTF_Ni         | 343298.6667 | 40479.75021 | 11.7914091   |
| UIJ65830.1 | alkylphosphonate utilization operon protein_PhnA [Bacillus cereus] | CPTF_U          | 331963.3333 | 71388.03251 | 21.50479446  |
| UIJ65830.1 | alkylphosphonate utilization operon protein_PhnA [Bacillus cereus] | CPTF_metals_mix | 327616.6667 | 38039.21936 | 11.61089262  |
| UIJ65830.1 | alkylphosphonate utilization operon protein_PhnA [Bacillus cereus] | CPTF_zcontrol   | 314376      | 52827.65794 | 16.80397293  |
| UIJ65837.1 | nucleotidyltransferase_domain-containing_protein [Bacillus cereus] | CPTF_Al         | 18659.4     | 20500.7499  | 109.868216   |
| UIJ65837.1 | nucleotidyltransferase_domain-containing_protein [Bacillus cereus] | CPTF_Cd         | 44083.26667 | 4345.626565 | 9.857768931  |
| UIJ65837.1 | nucleotidyltransferase_domain-containing_protein [Bacillus cereus] | CPTF_Co         | 0           | 0           | 0            |
| UIJ65837.1 | nucleotidyltransferase_domain-containing_protein [Bacillus cereus] | CPTF_Cu         | 0           | 0           | 0            |
| UIJ65837.1 | nucleotidyltransferase_domain-containing_protein [Bacillus cereus] | CPTF_Fe         | 22684.36667 | 20726.45255 | 91.36888348  |
| UIJ65837.1 | nucleotidyltransferase_domain-containing_protein [Bacillus cereus] | CPTF_Mn         | 10003.86667 | 17327.20534 | 173.2050808  |
| UIJ65837.1 | nucleotidyltransferase_domain-containing_protein [Bacillus cereus] | CPTF_Ni         | 0           | 0           | 0            |
| UIJ65837.1 | nucleotidyltransferase_domain-containing_protein [Bacillus cereus] | CPTF_U          | 6601.8      | 11434.65302 | 173.2050808  |
| UIJ65837.1 | nucleotidyltransferase_domain-containing_protein [Bacillus cereus] | CPTF_metals_mix | 7203.466667 | 12476.77026 | 173.2050808  |
| UIJ65837.1 | nucleotidyltransferase_domain-containing_protein [Bacillus cereus] | CPTF_zcontrol   | 0           | 0           | 0            |
| UIJ65839.1 | NifU_family_protein [Bacillus cereus]                              | CPTF_Al         | 2509446.2   | 36195.71552 | 1.442378622  |
| UIJ65839.1 | NifU_family_protein [Bacillus cereus]                              | CPTF_Cd         | 3215852.967 | 135482.6154 | 4.212960505  |
| UIJ65839.1 | NifU_family_protein [Bacillus cereus]                              | CPTF_Co         | 2659530.033 | 257349.4864 | 9.676502358  |
| UIJ65839.1 | NifU_family_protein [Bacillus cereus]                              | CPTF_Cu         | 3401513.867 | 287762.5118 | 8.459836505  |
| UIJ65839.1 | NifU_family_protein [Bacillus cereus]                              | CPTF_Fe         | 3052752.533 | 340560.9824 | 11.155866601 |
| UIJ65839.1 | NifU_family_protein [Bacillus cereus]                              | CPTF_Mn         | 2331514.733 | 265085.2556 | 11.36965818  |
| UIJ65839.1 | NifU_family_protein [Bacillus cereus]                              | CPTF_Ni         | 3330001.333 | 26287.41681 | 0.7894116    |
| UIJ65839.1 | NifU_family_protein [Bacillus cereus]                              | CPTF_U          | 2585479.4   | 475563.9672 | 18.39364751  |
| UIJ65839.1 | NifU_family_protein [Bacillus cereus]                              | CPTF_metals_mix | 3684704.7   | 109192.1953 | 2.963390669  |
| UIJ65839.1 | NifU_family_protein [Bacillus cereus]                              | CPTF_zcontrol   | 2587051.367 | 308504.6003 | 11.92495071  |
| UIJ65842.1 | phosphatidylglycerophosphatase_A [Bacillus cereus]                 | CPTF_Al         | 263527.3333 | 293676.3096 | 111.44055    |
| UIJ65842.1 | phosphatidylglycerophosphatase_A [Bacillus cereus]                 | CPTF_Cd         | 698712.5333 | 106777.2052 | 15.28199369  |
| UIJ65842.1 | phosphatidylglycerophosphatase_A [Bacillus cereus]                 | CPTF_Co         | 510608.3    | 54702.89021 | 10.71327869  |
| UIJ65842.1 | phosphatidylglycerophosphatase_A [Bacillus cereus]                 | CPTF_Cu         | 360426.1333 | 242306.5357 | 67.22779324  |
| UIJ65842.1 | phosphatidylglycerophosphatase_A [Bacillus cereus]                 | CPTF_Fe         | 459420.6333 | 289994.0061 | 63.12167653  |
| UIJ65842.1 | phosphatidylglycerophosphatase_A [Bacillus cereus]                 | CPTF_Mn         | 578554.1    | 90880.73437 | 15.70825172  |
| UIJ65842.1 | phosphatidylglycerophosphatase_A [Bacillus cereus]                 | CPTF_Ni         | 253106.9    | 280626.2567 | 110.8726221  |
| UIJ65842.1 | phosphatidylglycerophosphatase_A [Bacillus cereus]                 | CPTF_U          | 301198.5    | 198240.5938 | 65.817258    |
| UIJ65842.1 | phosphatidylglycerophosphatase_A [Bacillus cereus]                 | CPTF_metals_mix | 785324.2667 | 52746.20503 | 6.716487351  |
| UIJ65842.1 | phosphatidylglycerophosphatase_A [Bacillus cereus]                 | CPTF_zcontrol   | 345647.8333 | 232990.3855 | 67.40686994  |
| UIJ65843.1 | GNAT_family_N-acetyltransferase [Bacillus cereus]                  | CPTF_Al         | 59293.4     | 21316.41195 | 35.95073304  |
| UIJ65843.1 | GNAT_family_N-acetyltransferase [Bacillus cereus]                  | CPTF_Cd         | 83027.8     | 11362.01587 | 13.68459223  |
| UIJ65843.1 | GNAT_family_N-acetyltransferase [Bacillus cereus]                  | CPTF_Co         | 57274.46667 | 51985.7753  | 90.76605742  |
| UIJ65843.1 | GNAT_family_N-acetyltransferase [Bacillus cereus]                  | CPTF_Cu         | 101165.1    | 41373.41785 | 40.89692775  |
| UIJ65843.1 | GNAT_family_N-acetyltransferase [Bacillus cereus]                  | CPTF_Fe         | 73040.96667 | 36815.43981 | 50.40382335  |
| UIJ65843.1 | GNAT_family_N-acetyltransferase [Bacillus cereus]                  | CPTF_Mn         | 49972.66667 | 47658.91439 | 95.36996436  |
| UIJ65843.1 | GNAT_family_N-acetyltransferase [Bacillus cereus]                  | CPTF_Ni         | 89279.23333 | 12462.10488 | 13.95857067  |
| UIJ65843.1 | GNAT_family_N-acetyltransferase [Bacillus cereus]                  | CPTF_U          | 95853       | 89832.68956 | 93.71922585  |
| UIJ65843.1 | GNAT_family_N-acetyltransferase [Bacillus cereus]                  | CPTF_metals_mix | 37777.96667 | 9472.930349 | 25.07527849  |
| UIJ65843.1 | GNAT_family_N-acetyltransferase [Bacillus cereus]                  | CPTF_zcontrol   | 53482.16667 | 51667.81947 | 96.60756601  |
| UIJ65844.1 | NAD(P)H-dependent oxidoreductase [Bacillus cereus]                 | CPTF_Al         | 69309.86667 | 90585.47724 | 130.6963663  |
| UIJ65844.1 | NAD(P)H-dependent oxidoreductase [Bacillus cereus]                 | CPTF_Cd         | 94740       | 84556.6704  | 89.25128816  |
| UIJ65844.1 | NAD(P)H-dependent oxidoreductase [Bacillus cereus]                 | CPTF_Co         | 136715      | 8931.444284 | 6.532892721  |
| UIJ65844.1 | NAD(P)H-dependent oxidoreductase [Bacillus cereus]                 | CPTF_Cu         | 79292.63333 | 97740.05341 | 123.264986   |
| UIJ65844.1 | NAD(P)H-dependent oxidoreductase [Bacillus cereus]                 | CPTF_Fe         | 50314.66667 | 87147.55903 | 173.2050808  |
| UIJ65844.1 | NAD(P)H-dependent oxidoreductase [Bacillus cereus]                 | CPTF_Mn         | 36397.66667 | 63042.60794 | 173.2050808  |
| UIJ65844.1 | NAD(P)H-dependent oxidoreductase [Bacillus cereus]                 | CPTF_Ni         | 0           | 0           | 0            |
| UIJ65844.1 | NAD(P)H-dependent oxidoreductase [Bacillus cereus]                 | CPTF_U          | 0           | 0           | 0            |

|            |                                                       |                 |             |             |             |
|------------|-------------------------------------------------------|-----------------|-------------|-------------|-------------|
| UIJ65844.1 | NAD(P)H-dependent oxidoreductase [Bacillus cereus]    | CPTF_metals_mix | 116251.3667 | 104903.4824 | 90.23849389 |
| UIJ65844.1 | NAD(P)H-dependent oxidoreductase [Bacillus cereus]    | CPTF_zcontrol   | 0           | 0           | 0           |
| UIJ65846.1 | TIGR01457_family_HAD-type_hydrolase [Bacillus cereus] | CPTF_Al         | 997512.2    | 88407.66301 | 8.862815213 |
| UIJ65846.1 | TIGR01457_family_HAD-type_hydrolase [Bacillus cereus] | CPTF_Cd         | 1060083.333 | 81379.21052 | 7.676680499 |
| UIJ65846.1 | TIGR01457_family_HAD-type_hydrolase [Bacillus cereus] | CPTF_Co         | 1075641.333 | 67371.48929 | 6.263378619 |
| UIJ65846.1 | TIGR01457_family_HAD-type_hydrolase [Bacillus cereus] | CPTF_Cu         | 1079562.767 | 112179.8014 | 10.39122549 |
| UIJ65846.1 | TIGR01457_family_HAD-type_hydrolase [Bacillus cereus] | CPTF_Fe         | 986670.3    | 29412.1784  | 2.98095305  |
| UIJ65846.1 | TIGR01457_family_HAD-type_hydrolase [Bacillus cereus] | CPTF_Mn         | 1043786.667 | 107439.7681 | 10.29326888 |
| UIJ65846.1 | TIGR01457_family_HAD-type_hydrolase [Bacillus cereus] | CPTF_Ni         | 749207      | 188589.1891 | 25.17184024 |
| UIJ65846.1 | TIGR01457_family_HAD-type_hydrolase [Bacillus cereus] | CPTF_U          | 863385      | 248053.1422 | 28.73030481 |
| UIJ65846.1 | TIGR01457_family_HAD-type_hydrolase [Bacillus cereus] | CPTF_metals_mix | 1055378.567 | 44307.08628 | 4.198217367 |
| UIJ65846.1 | TIGR01457_family_HAD-type_hydrolase [Bacillus cereus] | CPTF_zcontrol   | 938783.4333 | 39472.13886 | 4.204605392 |
| UIJ65847.1 | transcriptional_regulator [Bacillus cereus]           | CPTF_Al         | 0           | 0           | 0           |
| UIJ65847.1 | transcriptional_regulator [Bacillus cereus]           | CPTF_Cd         | 0           | 0           | 0           |
| UIJ65847.1 | transcriptional_regulator [Bacillus cereus]           | CPTF_Co         | 14142.1     | 24494.83573 | 173.2050808 |
| UIJ65847.1 | transcriptional_regulator [Bacillus cereus]           | CPTF_Cu         | 0           | 0           | 0           |
| UIJ65847.1 | transcriptional_regulator [Bacillus cereus]           | CPTF_Fe         | 0           | 0           | 0           |
| UIJ65847.1 | transcriptional_regulator [Bacillus cereus]           | CPTF_Mn         | 0           | 0           | 0           |
| UIJ65847.1 | transcriptional_regulator [Bacillus cereus]           | CPTF_Ni         | 0           | 0           | 0           |
| UIJ65847.1 | transcriptional_regulator [Bacillus cereus]           | CPTF_U          | 0           | 0           | 0           |
| UIJ65847.1 | transcriptional_regulator [Bacillus cereus]           | CPTF_metals_mix | 0           | 0           | 0           |
| UIJ65847.1 | transcriptional_regulator [Bacillus cereus]           | CPTF_zcontrol   | 0           | 0           | 0           |
| UIJ65848.1 | DUF86_domain-containing_protein [Bacillus cereus]     | CPTF_Al         | 131650.7    | 87156.60296 | 66.20291648 |
| UIJ65848.1 | DUF86_domain-containing_protein [Bacillus cereus]     | CPTF_Cd         | 66231.26667 | 41254.76592 | 62.28895807 |
| UIJ65848.1 | DUF86_domain-containing_protein [Bacillus cereus]     | CPTF_Co         | 136573.9667 | 101486.4407 | 74.30877432 |
| UIJ65848.1 | DUF86_domain-containing_protein [Bacillus cereus]     | CPTF_Cu         | 141831.7667 | 82491.97985 | 58.16185033 |
| UIJ65848.1 | DUF86_domain-containing_protein [Bacillus cereus]     | CPTF_Fe         | 46786.83333 | 10570.67605 | 22.59327101 |
| UIJ65848.1 | DUF86_domain-containing_protein [Bacillus cereus]     | CPTF_Mn         | 38073.13333 | 3101.506496 | 8.146181373 |
| UIJ65848.1 | DUF86_domain-containing_protein [Bacillus cereus]     | CPTF_Ni         | 137218.8    | 104150.0375 | 75.90070563 |
| UIJ65848.1 | DUF86_domain-containing_protein [Bacillus cereus]     | CPTF_U          | 7759.8      | 13440.36786 | 173.2050808 |
| UIJ65848.1 | DUF86_domain-containing_protein [Bacillus cereus]     | CPTF_metals_mix | 224078.8667 | 16710.87483 | 7.457586287 |
| UIJ65848.1 | DUF86_domain-containing_protein [Bacillus cereus]     | CPTF_zcontrol   | 109334.4333 | 95590.32588 | 87.42929649 |
| UIJ65849.1 | class_II_fructose-bisphosphatase [Bacillus cereus]    | CPTF_Al         | 860975.3    | 444061.2862 | 51.57654188 |
| UIJ65849.1 | class_II_fructose-bisphosphatase [Bacillus cereus]    | CPTF_Cd         | 1073538.833 | 51772.90506 | 4.822639243 |
| UIJ65849.1 | class_II_fructose-bisphosphatase [Bacillus cereus]    | CPTF_Co         | 1198108.833 | 139377.7471 | 11.63314577 |
| UIJ65849.1 | class_II_fructose-bisphosphatase [Bacillus cereus]    | CPTF_Cu         | 1005770.7   | 81907.141   | 8.14371914  |
| UIJ65849.1 | class_II_fructose-bisphosphatase [Bacillus cereus]    | CPTF_Fe         | 994289.3    | 138945.4892 | 13.97435225 |
| UIJ65849.1 | class_II_fructose-bisphosphatase [Bacillus cereus]    | CPTF_Mn         | 1068251.8   | 84861.16741 | 7.943929269 |
| UIJ65849.1 | class_II_fructose-bisphosphatase [Bacillus cereus]    | CPTF_Ni         | 1215377.967 | 173324.128  | 14.26092399 |
| UIJ65849.1 | class_II_fructose-bisphosphatase [Bacillus cereus]    | CPTF_U          | 1025891.567 | 126644.5875 | 12.34483171 |
| UIJ65849.1 | class_II_fructose-bisphosphatase [Bacillus cereus]    | CPTF_metals_mix | 598152.7    | 172691.066  | 28.87073251 |
| UIJ65849.1 | class_II_fructose-bisphosphatase [Bacillus cereus]    | CPTF_zcontrol   | 1097228.333 | 61378.54874 | 5.593963159 |
| UIJ65850.1 | DUF3055_domain-containing_protein [Bacillus cereus]   | CPTF_Al         | 53836.33333 | 93247.26463 | 173.2050808 |
| UIJ65850.1 | DUF3055_domain-containing_protein [Bacillus cereus]   | CPTF_Cd         | 81528.5     | 79349.77476 | 97.32765201 |
| UIJ65850.1 | DUF3055_domain-containing_protein [Bacillus cereus]   | CPTF_Co         | 76640       | 132744.3739 | 173.2050808 |
| UIJ65850.1 | DUF3055_domain-containing_protein [Bacillus cereus]   | CPTF_Cu         | 114255      | 106847.5385 | 93.51672883 |
| UIJ65850.1 | DUF3055_domain-containing_protein [Bacillus cereus]   | CPTF_Fe         | 147744      | 127999.0739 | 86.63571711 |
| UIJ65850.1 | DUF3055_domain-containing_protein [Bacillus cereus]   | CPTF_Mn         | 0           | 0           | 0           |
| UIJ65850.1 | DUF3055_domain-containing_protein [Bacillus cereus]   | CPTF_Ni         | 142167.6667 | 123410.4053 | 86.80623955 |
| UIJ65850.1 | DUF3055_domain-containing_protein [Bacillus cereus]   | CPTF_U          | 0           | 0           | 0           |
| UIJ65850.1 | DUF3055_domain-containing_protein [Bacillus cereus]   | CPTF_metals_mix | 65363       | 113212.0369 | 173.2050808 |
| UIJ65850.1 | DUF3055_domain-containing_protein [Bacillus cereus]   | CPTF_zcontrol   | 64637.66667 | 111955.7227 | 173.2050808 |
| UIJ65860.1 | lipoyl_synthase [Bacillus cereus]                     | CPTF_Al         | 9050051.667 | 5486779.153 | 60.62704784 |
| UIJ65860.1 | lipoyl_synthase [Bacillus cereus]                     | CPTF_Cd         | 6687250     | 4646081.765 | 69.47671712 |
| UIJ65860.1 | lipoyl_synthase [Bacillus cereus]                     | CPTF_Co         | 12213703.33 | 871064.4265 | 7.13186167  |
| UIJ65860.1 | lipoyl_synthase [Bacillus cereus]                     | CPTF_Cu         | 10744627    | 2949272.212 | 27.44880964 |
| UIJ65860.1 | lipoyl_synthase [Bacillus cereus]                     | CPTF_Fe         | 10804589    | 1700279.561 | 15.73664265 |
| UIJ65860.1 | lipoyl_synthase [Bacillus cereus]                     | CPTF_Mn         | 10597803    | 5796190.049 | 54.69237396 |
| UIJ65860.1 | lipoyl_synthase [Bacillus cereus]                     | CPTF_Ni         | 5888798.733 | 3726307.989 | 63.27789687 |
| UIJ65860.1 | lipoyl_synthase [Bacillus cereus]                     | CPTF_U          | 5610013.667 | 2279741.703 | 40.63700801 |
| UIJ65860.1 | lipoyl_synthase [Bacillus cereus]                     | CPTF_metals_mix | 2061532.667 | 134097.4503 | 6.504745351 |



|            |                                                                                 |                 |             |             |             |
|------------|---------------------------------------------------------------------------------|-----------------|-------------|-------------|-------------|
| UIJ65860.1 | lipoyl_synthase_[Bacillus_cereus]                                               | CPTF_zcontrol   | 14305297.33 | 3474568.808 | 24.2886864  |
| UIJ65864.1 | Fe-S_cluster_assembly_protein_SufB_[Bacillus_cereus]                            | CPTF_Al         | 11065956.13 | 5570156.549 | 50.33597171 |
| UIJ65864.1 | Fe-S_cluster_assembly_protein_SufB_[Bacillus_cereus]                            | CPTF_Cd         | 10098610.77 | 3800112.482 | 37.63005199 |
| UIJ65864.1 | Fe-S_cluster_assembly_protein_SufB_[Bacillus_cereus]                            | CPTF_Co         | 15580728.83 | 825295.4456 | 5.296898845 |
| UIJ65864.1 | Fe-S_cluster_assembly_protein_SufB_[Bacillus_cereus]                            | CPTF_Cu         | 12997437.77 | 1071816.424 | 8.246367039 |
| UIJ65864.1 | Fe-S_cluster_assembly_protein_SufB_[Bacillus_cereus]                            | CPTF_Fe         | 14132481.03 | 118584.9439 | 0.839095016 |
| UIJ65864.1 | Fe-S_cluster_assembly_protein_SufB_[Bacillus_cereus]                            | CPTF_Mn         | 10834860.57 | 6191228.255 | 57.1417437  |
| UIJ65864.1 | Fe-S_cluster_assembly_protein_SufB_[Bacillus_cereus]                            | CPTF_Ni         | 6551662.033 | 3217458.254 | 49.10903885 |
| UIJ65864.1 | Fe-S_cluster_assembly_protein_SufB_[Bacillus_cereus]                            | CPTF_U          | 10875804.53 | 5898667.912 | 54.23661205 |
| UIJ65864.1 | Fe-S_cluster_assembly_protein_SufB_[Bacillus_cereus]                            | CPTF_metals_mix | 7776322.3   | 311181.371  | 4.001652182 |
| UIJ65864.1 | Fe-S_cluster_assembly_protein_SufB_[Bacillus_cereus]                            | CPTF_zcontrol   | 14375788.67 | 2800641.253 | 19.48165292 |
| UIJ65865.1 | iron-sulfur_cluster_assembly_scaffold_protein_SufU_[Bacillus_cereus]            | CPTF_Al         | 184666.6667 | 181983.6256 | 98.54708967 |
| UIJ65865.1 | iron-sulfur_cluster_assembly_scaffold_protein_SufU_[Bacillus_cereus]            | CPTF_Cd         | 258716      | 225156.4023 | 87.02840269 |
| UIJ65865.1 | iron-sulfur_cluster_assembly_scaffold_protein_SufU_[Bacillus_cereus]            | CPTF_Co         | 338660.6667 | 33192.80483 | 9.801198691 |
| UIJ65865.1 | iron-sulfur_cluster_assembly_scaffold_protein_SufU_[Bacillus_cereus]            | CPTF_Cu         | 91805       | 159010.9244 | 173.2050808 |
| UIJ65865.1 | iron-sulfur_cluster_assembly_scaffold_protein_SufU_[Bacillus_cereus]            | CPTF_Fe         | 0           | 0           | 0           |
| UIJ65865.1 | iron-sulfur_cluster_assembly_scaffold_protein_SufU_[Bacillus_cereus]            | CPTF_Mn         | 104362.6667 | 92149.26877 | 88.29715808 |
| UIJ65865.1 | iron-sulfur_cluster_assembly_scaffold_protein_SufU_[Bacillus_cereus]            | CPTF_Ni         | 0           | 0           | 0           |
| UIJ65865.1 | iron-sulfur_cluster_assembly_scaffold_protein_SufU_[Bacillus_cereus]            | CPTF_U          | 139884.5    | 167596.1333 | 119.8103673 |
| UIJ65865.1 | iron-sulfur_cluster_assembly_scaffold_protein_SufU_[Bacillus_cereus]            | CPTF_metals_mix | 364441.6333 | 56296.67893 | 15.44737861 |
| UIJ65865.1 | iron-sulfur_cluster_assembly_scaffold_protein_SufU_[Bacillus_cereus]            | CPTF_zcontrol   | 74076       | 128303.3956 | 173.2050808 |
| UIJ65866.1 | cysteine_desulfurase_Sufs_[Bacillus_cereus]                                     | CPTF_Al         | 2210609.733 | 337157.9704 | 15.25180882 |
| UIJ65866.1 | cysteine_desulfurase_Sufs_[Bacillus_cereus]                                     | CPTF_Cd         | 2643139.367 | 211740.1842 | 8.010935286 |
| UIJ65866.1 | cysteine_desulfurase_Sufs_[Bacillus_cereus]                                     | CPTF_Co         | 2430488.867 | 111770.797  | 4.598696112 |
| UIJ65866.1 | cysteine_desulfurase_Sufs_[Bacillus_cereus]                                     | CPTF_Cu         | 2611412.833 | 200547.1852 | 7.679643091 |
| UIJ65866.1 | cysteine_desulfurase_Sufs_[Bacillus_cereus]                                     | CPTF_Fe         | 2176006.4   | 241784.0608 | 11.11136717 |
| UIJ65866.1 | cysteine_desulfurase_Sufs_[Bacillus_cereus]                                     | CPTF_Mn         | 2085732.8   | 180078.113  | 8.63380549  |
| UIJ65866.1 | cysteine_desulfurase_Sufs_[Bacillus_cereus]                                     | CPTF_Ni         | 1633411.267 | 305869.9246 | 18.72583658 |
| UIJ65866.1 | cysteine_desulfurase_Sufs_[Bacillus_cereus]                                     | CPTF_U          | 1697316.233 | 266295.4954 | 15.68920925 |
| UIJ65866.1 | cysteine_desulfurase_Sufs_[Bacillus_cereus]                                     | CPTF_metals_mix | 2921547.567 | 156276.4912 | 5.349099669 |
| UIJ65866.1 | cysteine_desulfurase_Sufs_[Bacillus_cereus]                                     | CPTF_zcontrol   | 1823760.4   | 244046.5663 | 13.38150375 |
| UIJ65867.1 | Fe-S_cluster_assembly_protein_SufD_[Bacillus_cereus]                            | CPTF_Al         | 5445600.3   | 603030.4271 | 11.07371812 |
| UIJ65867.1 | Fe-S_cluster_assembly_protein_SufD_[Bacillus_cereus]                            | CPTF_Cd         | 6544970.133 | 564188.186  | 8.620179687 |
| UIJ65867.1 | Fe-S_cluster_assembly_protein_SufD_[Bacillus_cereus]                            | CPTF_Co         | 6506596.1   | 325678.7418 | 5.005362817 |
| UIJ65867.1 | Fe-S_cluster_assembly_protein_SufD_[Bacillus_cereus]                            | CPTF_Cu         | 6805684     | 384800.3908 | 5.654103112 |
| UIJ65867.1 | Fe-S_cluster_assembly_protein_SufD_[Bacillus_cereus]                            | CPTF_Fe         | 5463584.467 | 644627.8573 | 11.79862526 |
| UIJ65867.1 | Fe-S_cluster_assembly_protein_SufD_[Bacillus_cereus]                            | CPTF_Mn         | 5221508.8   | 856643.0314 | 16.406044   |
| UIJ65867.1 | Fe-S_cluster_assembly_protein_SufD_[Bacillus_cereus]                            | CPTF_Ni         | 4280535.333 | 867200.5029 | 20.25916002 |
| UIJ65867.1 | Fe-S_cluster_assembly_protein_SufD_[Bacillus_cereus]                            | CPTF_U          | 4874268.567 | 761712.0761 | 15.62720777 |
| UIJ65867.1 | Fe-S_cluster_assembly_protein_SufD_[Bacillus_cereus]                            | CPTF_metals_mix | 7085443.2   | 636965.3921 | 8.989774868 |
| UIJ65867.1 | Fe-S_cluster_assembly_protein_SufD_[Bacillus_cereus]                            | CPTF_zcontrol   | 5462815.033 | 482745.6589 | 8.83693949  |
| UIJ65868.1 | Fe-S_cluster_assembly_ATPase_SufC_[Bacillus_cereus]                             | CPTF_Al         | 6840228.467 | 58305.47806 | 0.852390799 |
| UIJ65868.1 | Fe-S_cluster_assembly_ATPase_SufC_[Bacillus_cereus]                             | CPTF_Cd         | 7928665.967 | 147908.2695 | 1.865487462 |
| UIJ65868.1 | Fe-S_cluster_assembly_ATPase_SufC_[Bacillus_cereus]                             | CPTF_Co         | 7820849.067 | 150845.4769 | 1.928760875 |
| UIJ65868.1 | Fe-S_cluster_assembly_ATPase_SufC_[Bacillus_cereus]                             | CPTF_Cu         | 8255327.867 | 188337.5879 | 2.281406515 |
| UIJ65868.1 | Fe-S_cluster_assembly_ATPase_SufC_[Bacillus_cereus]                             | CPTF_Fe         | 6731302.967 | 112968.246  | 1.678252287 |
| UIJ65868.1 | Fe-S_cluster_assembly_ATPase_SufC_[Bacillus_cereus]                             | CPTF_Mn         | 6989165.833 | 281254.0309 | 4.024143047 |
| UIJ65868.1 | Fe-S_cluster_assembly_ATPase_SufC_[Bacillus_cereus]                             | CPTF_Ni         | 6714580.133 | 324067.9214 | 4.826331877 |
| UIJ65868.1 | Fe-S_cluster_assembly_ATPase_SufC_[Bacillus_cereus]                             | CPTF_U          | 6423147.8   | 519592.0631 | 8.089368006 |
| UIJ65868.1 | Fe-S_cluster_assembly_ATPase_SufC_[Bacillus_cereus]                             | CPTF_metals_mix | 7107648.167 | 134766.0832 | 1.896071388 |
| UIJ65868.1 | Fe-S_cluster_assembly_ATPase_SufC_[Bacillus_cereus]                             | CPTF_zcontrol   | 6611706.133 | 63763.09975 | 0.964397063 |
| UIJ65870.1 | methionine_ABC_transporter_substrate-binding_lipoprotein_MetQ_[Bacillus_cereus] | CPTF_Al         | 14154.56667 | 24516.42863 | 173.2050808 |
| UIJ65870.1 | methionine_ABC_transporter_substrate-binding_lipoprotein_MetQ_[Bacillus_cereus] | CPTF_Cd         | 27035.8     | 23414.22677 | 86.60452722 |
| UIJ65870.1 | methionine_ABC_transporter_substrate-binding_lipoprotein_MetQ_[Bacillus_cereus] | CPTF_Co         | 86299.68    | 117188.0913 | 135.7920345 |
| UIJ65870.1 | methionine_ABC_transporter_substrate-binding_lipoprotein_MetQ_[Bacillus_cereus] | CPTF_Cu         | 16317.43333 | 28262.62358 | 173.2050808 |
| UIJ65870.1 | methionine_ABC_transporter_substrate-binding_lipoprotein_MetQ_[Bacillus_cereus] | CPTF_Fe         | 85763.53333 | 148546.7972 | 173.2050808 |
| UIJ65870.1 | methionine_ABC_transporter_substrate-binding_lipoprotein_MetQ_[Bacillus_cereus] | CPTF_Mn         | 183621.9333 | 318042.5179 | 173.2050808 |
| UIJ65870.1 | methionine_ABC_transporter_substrate-binding_lipoprotein_MetQ_[Bacillus_cereus] | CPTF_Ni         | 60431.36667 | 74107.00598 | 122.6300348 |
| UIJ65870.1 | methionine_ABC_transporter_substrate-binding_lipoprotein_MetQ_[Bacillus_cereus] | CPTF_U          | 84552.26667 | 78358.01713 | 92.67405856 |
| UIJ65870.1 | methionine_ABC_transporter_substrate-binding_lipoprotein_MetQ_[Bacillus_cereus] | CPTF_metals_mix | 210961.3667 | 151069.998  | 71.61026704 |
| UIJ65870.1 | methionine_ABC_transporter_substrate-binding_lipoprotein_MetQ_[Bacillus_cereus] | CPTF_zcontrol   | 135225.1333 | 117315.3745 | 86.75559907 |

|            |                                                                                      |                 |             |             |             |
|------------|--------------------------------------------------------------------------------------|-----------------|-------------|-------------|-------------|
| UIJ65872.1 | methionine_ABC_transporter_ATP-binding_protein_[Bacillus_cereus]                     | CPTF_Al         | 63254.83333 | 59528.7184  | 94.10935934 |
| UIJ65872.1 | methionine_ABC_transporter_ATP-binding_protein_[Bacillus_cereus]                     | CPTF_Cd         | 101439.2667 | 111639.7209 | 110.0557255 |
| UIJ65872.1 | methionine_ABC_transporter_ATP-binding_protein_[Bacillus_cereus]                     | CPTF_Co         | 92594.2     | 43507.65231 | 46.98744879 |
| UIJ65872.1 | methionine_ABC_transporter_ATP-binding_protein_[Bacillus_cereus]                     | CPTF_Cu         | 122201.8333 | 53519.26533 | 43.79579575 |
| UIJ65872.1 | methionine_ABC_transporter_ATP-binding_protein_[Bacillus_cereus]                     | CPTF_Fe         | 55503.43333 | 48280.52595 | 86.98655749 |
| UIJ65872.1 | methionine_ABC_transporter_ATP-binding_protein_[Bacillus_cereus]                     | CPTF_Mn         | 0           | 0           | 0           |
| UIJ65872.1 | methionine_ABC_transporter_ATP-binding_protein_[Bacillus_cereus]                     | CPTF_Ni         | 17500.73333 | 30312.1593  | 173.2050808 |
| UIJ65872.1 | methionine_ABC_transporter_ATP-binding_protein_[Bacillus_cereus]                     | CPTF_U          | 39878.7     | 38829.45163 | 97.36890027 |
| UIJ65872.1 | methionine_ABC_transporter_ATP-binding_protein_[Bacillus_cereus]                     | CPTF_metals_mix | 17825.33333 | 30874.383   | 173.2050808 |
| UIJ65872.1 | methionine_ABC_transporter_ATP-binding_protein_[Bacillus_cereus]                     | CPTF_zcontrol   | 0           | 0           | 0           |
| UIJ65876.1 | glycine_cleavage_system_protein_GcvH_[Bacillus_cereus]                               | CPTF_Al         | 1958520.633 | 24761.39539 | 1.264290759 |
| UIJ65876.1 | glycine_cleavage_system_protein_GcvH_[Bacillus_cereus]                               | CPTF_Cd         | 1911637.3   | 139458.0458 | 7.295214724 |
| UIJ65876.1 | glycine_cleavage_system_protein_GcvH_[Bacillus_cereus]                               | CPTF_Co         | 1760157.333 | 123741.6885 | 7.030149301 |
| UIJ65876.1 | glycine_cleavage_system_protein_GcvH_[Bacillus_cereus]                               | CPTF_Cu         | 1701409     | 33513.82137 | 1.969768667 |
| UIJ65876.1 | glycine_cleavage_system_protein_GcvH_[Bacillus_cereus]                               | CPTF_Fe         | 1835497.433 | 294912.9255 | 16.06719357 |
| UIJ65876.1 | glycine_cleavage_system_protein_GcvH_[Bacillus_cereus]                               | CPTF_Mn         | 2042359.333 | 249870.9543 | 12.23442664 |
| UIJ65876.1 | glycine_cleavage_system_protein_GcvH_[Bacillus_cereus]                               | CPTF_Ni         | 1614444.167 | 173758.1978 | 10.76272574 |
| UIJ65876.1 | glycine_cleavage_system_protein_GcvH_[Bacillus_cereus]                               | CPTF_U          | 1505435.133 | 219916.1476 | 14.60814503 |
| UIJ65876.1 | glycine_cleavage_system_protein_GcvH_[Bacillus_cereus]                               | CPTF_metals_mix | 3214948.767 | 638599.3276 | 19.86343715 |
| UIJ65876.1 | glycine_cleavage_system_protein_GcvH_[Bacillus_cereus]                               | CPTF_zcontrol   | 1717010     | 138824.0414 | 8.085220316 |
| UIJ65877.1 | arsenate_reductase_family_protein_[Bacillus_cereus]                                  | CPTF_Al         | 283263      | 96386.39635 | 34.02717487 |
| UIJ65877.1 | arsenate_reductase_family_protein_[Bacillus_cereus]                                  | CPTF_Cd         | 292922.3333 | 91028.02486 | 31.07582267 |
| UIJ65877.1 | arsenate_reductase_family_protein_[Bacillus_cereus]                                  | CPTF_Co         | 249050.4333 | 46833.18994 | 18.80470125 |
| UIJ65877.1 | arsenate_reductase_family_protein_[Bacillus_cereus]                                  | CPTF_Cu         | 260461.4667 | 35297.39903 | 13.55186987 |
| UIJ65877.1 | arsenate_reductase_family_protein_[Bacillus_cereus]                                  | CPTF_Fe         | 356664.1    | 77873.23799 | 21.83377525 |
| UIJ65877.1 | arsenate_reductase_family_protein_[Bacillus_cereus]                                  | CPTF_Mn         | 276235.1333 | 101954.2058 | 36.90848611 |
| UIJ65877.1 | arsenate_reductase_family_protein_[Bacillus_cereus]                                  | CPTF_Ni         | 254032      | 59319.55479 | 23.35121355 |
| UIJ65877.1 | arsenate_reductase_family_protein_[Bacillus_cereus]                                  | CPTF_U          | 194170.6667 | 24585.14865 | 12.66161829 |
| UIJ65877.1 | arsenate_reductase_family_protein_[Bacillus_cereus]                                  | CPTF_metals_mix | 638613.6667 | 55418.23023 | 8.677896063 |
| UIJ65877.1 | arsenate_reductase_family_protein_[Bacillus_cereus]                                  | CPTF_zcontrol   | 222788.7333 | 18355.30858 | 8.23888547  |
| UIJ65882.1 | L-lactate_dehydrogenase_[Bacillus_cereus]                                            | CPTF_Al         | 2211412.767 | 375046.7744 | 16.95960067 |
| UIJ65882.1 | L-lactate_dehydrogenase_[Bacillus_cereus]                                            | CPTF_Cd         | 3157922     | 367807.5915 | 11.64713984 |
| UIJ65882.1 | L-lactate_dehydrogenase_[Bacillus_cereus]                                            | CPTF_Co         | 2319286.667 | 361208.6522 | 15.57412705 |
| UIJ65882.1 | L-lactate_dehydrogenase_[Bacillus_cereus]                                            | CPTF_Cu         | 2326439.333 | 225088.7429 | 9.675246618 |
| UIJ65882.1 | L-lactate_dehydrogenase_[Bacillus_cereus]                                            | CPTF_Fe         | 2373092     | 813839.0215 | 34.29445725 |
| UIJ65882.1 | L-lactate_dehydrogenase_[Bacillus_cereus]                                            | CPTF_Mn         | 2599023     | 1183765.078 | 45.54654106 |
| UIJ65882.1 | L-lactate_dehydrogenase_[Bacillus_cereus]                                            | CPTF_Ni         | 1802202.633 | 245044.6501 | 13.59695328 |
| UIJ65882.1 | L-lactate_dehydrogenase_[Bacillus_cereus]                                            | CPTF_U          | 1979758     | 200292.7401 | 10.11703148 |
| UIJ65882.1 | L-lactate_dehydrogenase_[Bacillus_cereus]                                            | CPTF_metals_mix | 7920583.433 | 300412.3807 | 3.792806215 |
| UIJ65882.1 | L-lactate_dehydrogenase_[Bacillus_cereus]                                            | CPTF_zcontrol   | 1670981.333 | 126352.8308 | 7.561594393 |
| UIJ65888.1 | acyl-CoA_dehydrogenase_family_protein_[Bacillus_cereus]                              | CPTF_Al         | 11375227.3  | 520356.0915 | 4.574467637 |
| UIJ65888.1 | acyl-CoA_dehydrogenase_family_protein_[Bacillus_cereus]                              | CPTF_Cd         | 12977589.33 | 310537.9183 | 2.392878294 |
| UIJ65888.1 | acyl-CoA_dehydrogenase_family_protein_[Bacillus_cereus]                              | CPTF_Co         | 8960713     | 1547429.96  | 17.26904946 |
| UIJ65888.1 | acyl-CoA_dehydrogenase_family_protein_[Bacillus_cereus]                              | CPTF_Cu         | 10682971.97 | 837160.4039 | 7.836399894 |
| UIJ65888.1 | acyl-CoA_dehydrogenase_family_protein_[Bacillus_cereus]                              | CPTF_Fe         | 11496905    | 1366591.109 | 11.88659999 |
| UIJ65888.1 | acyl-CoA_dehydrogenase_family_protein_[Bacillus_cereus]                              | CPTF_Mn         | 10844719.03 | 1104186.78  | 10.18179241 |
| UIJ65888.1 | acyl-CoA_dehydrogenase_family_protein_[Bacillus_cereus]                              | CPTF_Ni         | 8196722.367 | 920841.0048 | 11.23425881 |
| UIJ65888.1 | acyl-CoA_dehydrogenase_family_protein_[Bacillus_cereus]                              | CPTF_U          | 8762683.2   | 1084984.083 | 12.38187046 |
| UIJ65888.1 | acyl-CoA_dehydrogenase_family_protein_[Bacillus_cereus]                              | CPTF_metals_mix | 14266088.33 | 1264374.546 | 8.862797683 |
| UIJ65888.1 | acyl-CoA_dehydrogenase_family_protein_[Bacillus_cereus]                              | CPTF_zcontrol   | 10026575.6  | 496440.856  | 4.951250315 |
| UIJ65889.1 | acetyl-CoA_C-acetyltransferase_[Bacillus_cereus]                                     | CPTF_Al         | 933646.5333 | 140103.922  | 15.00609888 |
| UIJ65889.1 | acetyl-CoA_C-acetyltransferase_[Bacillus_cereus]                                     | CPTF_Cd         | 1118130.567 | 135677.2274 | 12.13429195 |
| UIJ65889.1 | acetyl-CoA_C-acetyltransferase_[Bacillus_cereus]                                     | CPTF_Co         | 668106.2    | 144718.7807 | 21.66104441 |
| UIJ65889.1 | acetyl-CoA_C-acetyltransferase_[Bacillus_cereus]                                     | CPTF_Cu         | 1067235.467 | 275667.3365 | 25.83003893 |
| UIJ65889.1 | acetyl-CoA_C-acetyltransferase_[Bacillus_cereus]                                     | CPTF_Fe         | 760495.9    | 291649.2158 | 38.34987353 |
| UIJ65889.1 | acetyl-CoA_C-acetyltransferase_[Bacillus_cereus]                                     | CPTF_Mn         | 930919.3667 | 190720.6399 | 20.48734259 |
| UIJ65889.1 | acetyl-CoA_C-acetyltransferase_[Bacillus_cereus]                                     | CPTF_Ni         | 846156.8    | 397146.5595 | 46.93533864 |
| UIJ65889.1 | acetyl-CoA_C-acetyltransferase_[Bacillus_cereus]                                     | CPTF_U          | 594107.3    | 437087.4912 | 73.57046298 |
| UIJ65889.1 | acetyl-CoA_C-acetyltransferase_[Bacillus_cereus]                                     | CPTF_metals_mix | 2793133.667 | 72213.71028 | 2.585401162 |
| UIJ65889.1 | acetyl-CoA_C-acetyltransferase_[Bacillus_cereus]                                     | CPTF_zcontrol   | 763983.6333 | 55611.02414 | 7.279085796 |
| UIJ65890.1 | 3-hydroxyacyl-CoA_dehydrogenase/enoyl-CoA_hydratase_family_protein_[Bacillus_cereus] | CPTF_Al         | 6152736.067 | 817461.0251 | 13.28613833 |

|            |                                                                                      |                 |             |             |             |
|------------|--------------------------------------------------------------------------------------|-----------------|-------------|-------------|-------------|
| UIJ65890.1 | 3-hydroxyacyl-CoA_dehydrogenase/enoyl-CoA_hydratase_family_protein_[Bacillus_cereus] | CPTF_Cd         | 5980231.167 | 281759.9483 | 4.711522689 |
| UIJ65890.1 | 3-hydroxyacyl-CoA_dehydrogenase/enoyl-CoA_hydratase_family_protein_[Bacillus_cereus] | CPTF_Co         | 4926086.267 | 855658.3337 | 17.36994213 |
| UIJ65890.1 | 3-hydroxyacyl-CoA_dehydrogenase/enoyl-CoA_hydratase_family_protein_[Bacillus_cereus] | CPTF_Cu         | 6645817.3   | 80979.86238 | 1.218508706 |
| UIJ65890.1 | 3-hydroxyacyl-CoA_dehydrogenase/enoyl-CoA_hydratase_family_protein_[Bacillus_cereus] | CPTF_Fe         | 5460130.767 | 793424.1567 | 14.53122994 |
| UIJ65890.1 | 3-hydroxyacyl-CoA_dehydrogenase/enoyl-CoA_hydratase_family_protein_[Bacillus_cereus] | CPTF_Mn         | 5985538.8   | 452534.4654 | 7.560463319 |
| UIJ65890.1 | 3-hydroxyacyl-CoA_dehydrogenase/enoyl-CoA_hydratase_family_protein_[Bacillus_cereus] | CPTF_Ni         | 5385905.967 | 1106350.25  | 20.54158126 |
| UIJ65890.1 | 3-hydroxyacyl-CoA_dehydrogenase/enoyl-CoA_hydratase_family_protein_[Bacillus_cereus] | CPTF_U          | 4804635.633 | 227613.8409 | 4.737379861 |
| UIJ65890.1 | 3-hydroxyacyl-CoA_dehydrogenase/enoyl-CoA_hydratase_family_protein_[Bacillus_cereus] | CPTF_metals_mix | 6028620.267 | 323283.7441 | 5.362483118 |
| UIJ65890.1 | 3-hydroxyacyl-CoA_dehydrogenase/enoyl-CoA_hydratase_family_protein_[Bacillus_cereus] | CPTF_zcontrol   | 5877658.833 | 301294.2307 | 5.126092535 |
| UIJ65893.1 | proline_dehydrogenase_[Bacillus_cereus]                                              | CPTF_AI         | 441673.3333 | 132138.7896 | 29.91776493 |
| UIJ65893.1 | proline_dehydrogenase_[Bacillus_cereus]                                              | CPTF_Cd         | 403474.7    | 34693.48299 | 8.598676197 |
| UIJ65893.1 | proline_dehydrogenase_[Bacillus_cereus]                                              | CPTF_Co         | 961252.3667 | 72901.71537 | 7.584034942 |
| UIJ65893.1 | proline_dehydrogenase_[Bacillus_cereus]                                              | CPTF_Cu         | 551919.8667 | 408672.1247 | 74.04555432 |
| UIJ65893.1 | proline_dehydrogenase_[Bacillus_cereus]                                              | CPTF_Fe         | 492840.8    | 296423.626  | 60.14591852 |
| UIJ65893.1 | proline_dehydrogenase_[Bacillus_cereus]                                              | CPTF_Mn         | 507838.3333 | 392163.6765 | 77.2221494  |
| UIJ65893.1 | proline_dehydrogenase_[Bacillus_cereus]                                              | CPTF_Ni         | 733052.6667 | 356833.0273 | 48.67767945 |
| UIJ65893.1 | proline_dehydrogenase_[Bacillus_cereus]                                              | CPTF_U          | 402699.3    | 297259.7083 | 73.81679291 |
| UIJ65893.1 | proline_dehydrogenase_[Bacillus_cereus]                                              | CPTF_metals_mix | 856100      | 103653.6178 | 12.10892604 |
| UIJ65893.1 | proline_dehydrogenase_[Bacillus_cereus]                                              | CPTF_zcontrol   | 319542.2    | 279662.084  | 87.51960898 |
| UIJ65894.1 | YusU_family_protein_[Bacillus_cereus]                                                | CPTF_AI         | 414877      | 83962.71734 | 20.23797833 |
| UIJ65894.1 | YusU_family_protein_[Bacillus_cereus]                                                | CPTF_Cd         | 325673.6667 | 99510.98001 | 30.55542716 |
| UIJ65894.1 | YusU_family_protein_[Bacillus_cereus]                                                | CPTF_Co         | 312593.3667 | 165031.3924 | 52.79427206 |
| UIJ65894.1 | YusU_family_protein_[Bacillus_cereus]                                                | CPTF_Cu         | 227299.5667 | 227299.8022 | 88.22121053 |
| UIJ65894.1 | YusU_family_protein_[Bacillus_cereus]                                                | CPTF_Fe         | 303666.3333 | 128034.7868 | 42.16298377 |
| UIJ65894.1 | YusU_family_protein_[Bacillus_cereus]                                                | CPTF_Mn         | 377139.6667 | 83455.9007  | 22.12864572 |
| UIJ65894.1 | YusU_family_protein_[Bacillus_cereus]                                                | CPTF_Ni         | 353959.6    | 161759.9738 | 45.70012336 |
| UIJ65894.1 | YusU_family_protein_[Bacillus_cereus]                                                | CPTF_U          | 262334.6    | 141448.0606 | 53.91894956 |
| UIJ65894.1 | YusU_family_protein_[Bacillus_cereus]                                                | CPTF_metals_mix | 215497.6667 | 59232.09328 | 27.48618776 |
| UIJ65894.1 | YusU_family_protein_[Bacillus_cereus]                                                | CPTF_zcontrol   | 389209.6667 | 117212.3079 | 30.11546679 |
| UIJ65895.1 | MTH1187_family_thiamine-binding_protein_[Bacillus_cereus]                            | CPTF_AI         | 54495.93333 | 60648.25455 | 111.2895052 |
| UIJ65895.1 | MTH1187_family_thiamine-binding_protein_[Bacillus_cereus]                            | CPTF_Cd         | 89265.56667 | 25206.52435 | 28.23767919 |
| UIJ65895.1 | MTH1187_family_thiamine-binding_protein_[Bacillus_cereus]                            | CPTF_Co         | 71003.9     | 12758.57913 | 17.96884274 |
| UIJ65895.1 | MTH1187_family_thiamine-binding_protein_[Bacillus_cereus]                            | CPTF_Cu         | 93972.96667 | 32285.98531 | 34.35667347 |
| UIJ65895.1 | MTH1187_family_thiamine-binding_protein_[Bacillus_cereus]                            | CPTF_Fe         | 49970.9     | 48191.90345 | 96.43993493 |
| UIJ65895.1 | MTH1187_family_thiamine-binding_protein_[Bacillus_cereus]                            | CPTF_Mn         | 33363.66667 | 57787.56579 | 173.2050808 |
| UIJ65895.1 | MTH1187_family_thiamine-binding_protein_[Bacillus_cereus]                            | CPTF_Ni         | 0           | 0           | 0           |
| UIJ65895.1 | MTH1187_family_thiamine-binding_protein_[Bacillus_cereus]                            | CPTF_U          | 0           | 0           | 0           |
| UIJ65895.1 | MTH1187_family_thiamine-binding_protein_[Bacillus_cereus]                            | CPTF_metals_mix | 166994      | 53158.60859 | 31.83264584 |
| UIJ65895.1 | MTH1187_family_thiamine-binding_protein_[Bacillus_cereus]                            | CPTF_zcontrol   | 45982.73333 | 46823.03348 | 101.8274254 |
| UIJ65926.1 | neutral_protease_NprB_[Bacillus_cereus]                                              | CPTF_AI         | 4333240.9   | 494373.7553 | 11.40886848 |
| UIJ65926.1 | neutral_protease_NprB_[Bacillus_cereus]                                              | CPTF_Cd         | 5338455.267 | 787744.3369 | 14.75603517 |
| UIJ65926.1 | neutral_protease_NprB_[Bacillus_cereus]                                              | CPTF_Co         | 4336420.033 | 42585.65571 | 0.982046374 |
| UIJ65926.1 | neutral_protease_NprB_[Bacillus_cereus]                                              | CPTF_Cu         | 2850018.333 | 274461.2647 | 9.630157866 |
| UIJ65926.1 | neutral_protease_NprB_[Bacillus_cereus]                                              | CPTF_Fe         | 4173619.333 | 1104332.319 | 26.45982373 |
| UIJ65926.1 | neutral_protease_NprB_[Bacillus_cereus]                                              | CPTF_Mn         | 4406784.967 | 465349.7208 | 10.55984634 |
| UIJ65926.1 | neutral_protease_NprB_[Bacillus_cereus]                                              | CPTF_Ni         | 3255501.333 | 453787.2082 | 13.93908838 |
| UIJ65926.1 | neutral_protease_NprB_[Bacillus_cereus]                                              | CPTF_U          | 4296521.533 | 589725.8672 | 13.72565836 |
| UIJ65926.1 | neutral_protease_NprB_[Bacillus_cereus]                                              | CPTF_metals_mix | 1649877.7   | 214168.7234 | 12.98088479 |
| UIJ65926.1 | neutral_protease_NprB_[Bacillus_cereus]                                              | CPTF_zcontrol   | 4512151.333 | 365048.0667 | 8.09032964  |
| UIJ65933.1 | DNA_starvation/stationary_phase_protection_protein_[Bacillus_cereus]                 | CPTF_AI         | 554565.8    | 111722.7211 | 20.14598108 |
| UIJ65933.1 | DNA_starvation/stationary_phase_protection_protein_[Bacillus_cereus]                 | CPTF_Cd         | 645730.5333 | 348771.0478 | 54.0118563  |
| UIJ65933.1 | DNA_starvation/stationary_phase_protection_protein_[Bacillus_cereus]                 | CPTF_Co         | 602776.5667 | 85799.08344 | 14.23397793 |
| UIJ65933.1 | DNA_starvation/stationary_phase_protection_protein_[Bacillus_cereus]                 | CPTF_Cu         | 697076.9    | 59283.03411 | 8.504518527 |
| UIJ65933.1 | DNA_starvation/stationary_phase_protection_protein_[Bacillus_cereus]                 | CPTF_Fe         | 504030.9667 | 66794.57804 | 13.25207824 |
| UIJ65933.1 | DNA_starvation/stationary_phase_protection_protein_[Bacillus_cereus]                 | CPTF_Mn         | 544182.3    | 103837.5492 | 19.08139041 |
| UIJ65933.1 | DNA_starvation/stationary_phase_protection_protein_[Bacillus_cereus]                 | CPTF_Ni         | 352465.1    | 45567.59556 | 12.92825745 |
| UIJ65933.1 | DNA_starvation/stationary_phase_protection_protein_[Bacillus_cereus]                 | CPTF_U          | 478503.6667 | 104863.1556 | 21.91480711 |
| UIJ65933.1 | DNA_starvation/stationary_phase_protection_protein_[Bacillus_cereus]                 | CPTF_metals_mix | 753578.7    | 69791.47304 | 9.261338337 |
| UIJ65933.1 | DNA_starvation/stationary_phase_protection_protein_[Bacillus_cereus]                 | CPTF_zcontrol   | 336355.7    | 70308.55322 | 20.90303605 |
| UIJ65936.1 | MazG-like_family_protein_[Bacillus_cereus]                                           | CPTF_AI         | 772874.9    | 225045.9612 | 29.11803207 |
| UIJ65936.1 | MazG-like_family_protein_[Bacillus_cereus]                                           | CPTF_Cd         | 763645.6667 | 60656.54746 | 7.943022544 |

|            |                                                       |                 |             |             |             |
|------------|-------------------------------------------------------|-----------------|-------------|-------------|-------------|
| UIJ65936.1 | MazG-like_family_protein_[Bacillus_cereus]            | CPTF_Co         | 546228.6667 | 241752.3325 | 44.25844838 |
| UIJ65936.1 | MazG-like_family_protein_[Bacillus_cereus]            | CPTF_Cu         | 482134.2667 | 77297.64533 | 16.03238987 |
| UIJ65936.1 | MazG-like_family_protein_[Bacillus_cereus]            | CPTF_Fe         | 853624.2    | 213132.5115 | 24.96795563 |
| UIJ65936.1 | MazG-like_family_protein_[Bacillus_cereus]            | CPTF_Mn         | 822245.5333 | 127320.1234 | 15.48444086 |
| UIJ65936.1 | MazG-like_family_protein_[Bacillus_cereus]            | CPTF_Ni         | 559322.5333 | 94553.58556 | 16.9050199  |
| UIJ65936.1 | MazG-like_family_protein_[Bacillus_cereus]            | CPTF_U          | 482952.6667 | 199600.3911 | 41.32918293 |
| UIJ65936.1 | MazG-like_family_protein_[Bacillus_cereus]            | CPTF_metals_mix | 247338.6667 | 71669.13812 | 28.97611566 |
| UIJ65936.1 | MazG-like_family_protein_[Bacillus_cereus]            | CPTF_zcontrol   | 758592.9667 | 108473.4033 | 14.29928935 |
| UIJ65937.1 | ferritin_[Bacillus_cereus]                            | CPTF_Al         | 41646.09333 | 68351.86467 | 164.1255138 |
| UIJ65937.1 | ferritin_[Bacillus_cereus]                            | CPTF_Cd         | 0           | 0           | 0           |
| UIJ65937.1 | ferritin_[Bacillus_cereus]                            | CPTF_Co         | 0           | 0           | 0           |
| UIJ65937.1 | ferritin_[Bacillus_cereus]                            | CPTF_Cu         | 0           | 0           | 0           |
| UIJ65937.1 | ferritin_[Bacillus_cereus]                            | CPTF_Fe         | 4380.066667 | 7586.498007 | 173.2050808 |
| UIJ65937.1 | ferritin_[Bacillus_cereus]                            | CPTF_Mn         | 0           | 0           | 0           |
| UIJ65937.1 | ferritin_[Bacillus_cereus]                            | CPTF_Ni         | 0           | 0           | 0           |
| UIJ65937.1 | ferritin_[Bacillus_cereus]                            | CPTF_U          | 10407.93333 | 18027.06934 | 173.2050808 |
| UIJ65937.1 | ferritin_[Bacillus_cereus]                            | CPTF_metals_mix | 715457.9667 | 275375.2956 | 38.48937441 |
| UIJ65937.1 | ferritin_[Bacillus_cereus]                            | CPTF_zcontrol   | 0           | 0           | 0           |
| UIJ65945.1 | aldo/keto_reductase_[Bacillus_cereus]                 | CPTF_Al         | 15735.43333 | 27254.57001 | 173.2050808 |
| UIJ65945.1 | aldo/keto_reductase_[Bacillus_cereus]                 | CPTF_Cd         | 74937.33333 | 34528.32177 | 46.07626164 |
| UIJ65945.1 | aldo/keto_reductase_[Bacillus_cereus]                 | CPTF_Co         | 0           | 0           | 0           |
| UIJ65945.1 | aldo/keto_reductase_[Bacillus_cereus]                 | CPTF_Cu         | 37054       | 34604.2523  | 93.38870917 |
| UIJ65945.1 | aldo/keto_reductase_[Bacillus_cereus]                 | CPTF_Fe         | 8742.533333 | 15142.51192 | 173.2050808 |
| UIJ65945.1 | aldo/keto_reductase_[Bacillus_cereus]                 | CPTF_Mn         | 12830.6     | 22223.25109 | 173.2050808 |
| UIJ65945.1 | aldo/keto_reductase_[Bacillus_cereus]                 | CPTF_Ni         | 0           | 0           | 0           |
| UIJ65945.1 | aldo/keto_reductase_[Bacillus_cereus]                 | CPTF_U          | 0           | 0           | 0           |
| UIJ65945.1 | aldo/keto_reductase_[Bacillus_cereus]                 | CPTF_metals_mix | 0           | 0           | 0           |
| UIJ65945.1 | aldo/keto_reductase_[Bacillus_cereus]                 | CPTF_zcontrol   | 0           | 0           | 0           |
| UIJ65947.1 | DUF1641_domain-containing_protein_[Bacillus_cereus]   | CPTF_Al         | 3535681.8   | 328236.4315 | 9.283539923 |
| UIJ65947.1 | DUF1641_domain-containing_protein_[Bacillus_cereus]   | CPTF_Cd         | 3467132     | 200291.1083 | 5.776852692 |
| UIJ65947.1 | DUF1641_domain-containing_protein_[Bacillus_cereus]   | CPTF_Co         | 3343860.333 | 155060.9853 | 4.637184866 |
| UIJ65947.1 | DUF1641_domain-containing_protein_[Bacillus_cereus]   | CPTF_Cu         | 3260813.3   | 182118.8111 | 5.585073242 |
| UIJ65947.1 | DUF1641_domain-containing_protein_[Bacillus_cereus]   | CPTF_Fe         | 3410185.667 | 199295.5607 | 5.844126397 |
| UIJ65947.1 | DUF1641_domain-containing_protein_[Bacillus_cereus]   | CPTF_Mn         | 3322275.467 | 314426.3079 | 9.464185348 |
| UIJ65947.1 | DUF1641_domain-containing_protein_[Bacillus_cereus]   | CPTF_Ni         | 3107970.6   | 226090.8372 | 7.274548775 |
| UIJ65947.1 | DUF1641_domain-containing_protein_[Bacillus_cereus]   | CPTF_U          | 2985665.033 | 409585.8567 | 13.71841289 |
| UIJ65947.1 | DUF1641_domain-containing_protein_[Bacillus_cereus]   | CPTF_metals_mix | 3342539.6   | 237578.3041 | 7.107718456 |
| UIJ65947.1 | DUF1641_domain-containing_protein_[Bacillus_cereus]   | CPTF_zcontrol   | 3232388.667 | 95711.89917 | 2.961026938 |
| UIJ65948.1 | NAD(P)/FAD-dependent_oxidoreductase_[Bacillus_cereus] | CPTF_Al         | 5413516.533 | 1235591.334 | 22.82419064 |
| UIJ65948.1 | NAD(P)/FAD-dependent_oxidoreductase_[Bacillus_cereus] | CPTF_Cd         | 8165914.233 | 742692.9717 | 9.095037622 |
| UIJ65948.1 | NAD(P)/FAD-dependent_oxidoreductase_[Bacillus_cereus] | CPTF_Co         | 5193850.767 | 1264541.843 | 24.34690367 |
| UIJ65948.1 | NAD(P)/FAD-dependent_oxidoreductase_[Bacillus_cereus] | CPTF_Cu         | 4756047.167 | 595639.5051 | 12.52383511 |
| UIJ65948.1 | NAD(P)/FAD-dependent_oxidoreductase_[Bacillus_cereus] | CPTF_Fe         | 6508982.267 | 1745426.525 | 26.81565956 |
| UIJ65948.1 | NAD(P)/FAD-dependent_oxidoreductase_[Bacillus_cereus] | CPTF_Mn         | 5984082.6   | 3165881.082 | 52.90503648 |
| UIJ65948.1 | NAD(P)/FAD-dependent_oxidoreductase_[Bacillus_cereus] | CPTF_Ni         | 2641299.733 | 353995.4298 | 13.40231952 |
| UIJ65948.1 | NAD(P)/FAD-dependent_oxidoreductase_[Bacillus_cereus] | CPTF_U          | 3948219.967 | 595382.1123 | 15.07976043 |
| UIJ65948.1 | NAD(P)/FAD-dependent_oxidoreductase_[Bacillus_cereus] | CPTF_metals_mix | 9422154.067 | 269794.6169 | 2.863406977 |
| UIJ65948.1 | NAD(P)/FAD-dependent_oxidoreductase_[Bacillus_cereus] | CPTF_zcontrol   | 4839135.233 | 1678979.792 | 34.69586427 |
| UIJ65949.1 | tyrosine--tRNA_ligase_[Bacillus_cereus]               | CPTF_Al         | 5825532.2   | 203283.8447 | 3.489532591 |
| UIJ65949.1 | tyrosine--tRNA_ligase_[Bacillus_cereus]               | CPTF_Cd         | 6654576.267 | 55259.87542 | 0.830404119 |
| UIJ65949.1 | tyrosine--tRNA_ligase_[Bacillus_cereus]               | CPTF_Co         | 6707758.5   | 167613.2719 | 2.498797056 |
| UIJ65949.1 | tyrosine--tRNA_ligase_[Bacillus_cereus]               | CPTF_Cu         | 6813627.7   | 308292.0812 | 4.524639366 |
| UIJ65949.1 | tyrosine--tRNA_ligase_[Bacillus_cereus]               | CPTF_Fe         | 6163925.033 | 91461.95296 | 1.483826498 |
| UIJ65949.1 | tyrosine--tRNA_ligase_[Bacillus_cereus]               | CPTF_Mn         | 5716399.733 | 178563.7542 | 3.123710072 |
| UIJ65949.1 | tyrosine--tRNA_ligase_[Bacillus_cereus]               | CPTF_Ni         | 5774732.133 | 438155.322  | 7.587457079 |
| UIJ65949.1 | tyrosine--tRNA_ligase_[Bacillus_cereus]               | CPTF_U          | 6328929.833 | 1022929.717 | 16.16275965 |
| UIJ65949.1 | tyrosine--tRNA_ligase_[Bacillus_cereus]               | CPTF_metals_mix | 9772901.133 | 309783.8057 | 3.16982441  |
| UIJ65949.1 | tyrosine--tRNA_ligase_[Bacillus_cereus]               | CPTF_zcontrol   | 5893769.467 | 254189.976  | 4.312859154 |
| UIJ65950.1 | UDP-N-acetylmuramate_dehydrogenase_[Bacillus_cereus]  | CPTF_Al         | 113585      | 109958.8692 | 96.80756189 |
| UIJ65950.1 | UDP-N-acetylmuramate_dehydrogenase_[Bacillus_cereus]  | CPTF_Cd         | 36146       | 62606.70849 | 173.2050808 |
| UIJ65950.1 | UDP-N-acetylmuramate_dehydrogenase_[Bacillus_cereus]  | CPTF_Co         | 115213.3333 | 101645.5987 | 88.22381559 |

|            |                                                                               |                 |             |             |             |
|------------|-------------------------------------------------------------------------------|-----------------|-------------|-------------|-------------|
| UIJ65950.1 | UDP-N-acetylmuramate_dehydrogenase_[Bacillus_cereus]                          | CPTF_Cu         | 157015.4    | 52529.30746 | 33.45487605 |
| UIJ65950.1 | UDP-N-acetylmuramate_dehydrogenase_[Bacillus_cereus]                          | CPTF_Fe         | 41891.33333 | 72557.91773 | 173.2050808 |
| UIJ65950.1 | UDP-N-acetylmuramate_dehydrogenase_[Bacillus_cereus]                          | CPTF_Mn         | 61473.33333 | 106474.9366 | 173.2050808 |
| UIJ65950.1 | UDP-N-acetylmuramate_dehydrogenase_[Bacillus_cereus]                          | CPTF_Ni         | 178656.3333 | 50239.84731 | 28.12094392 |
| UIJ65950.1 | UDP-N-acetylmuramate_dehydrogenase_[Bacillus_cereus]                          | CPTF_U          | 143141      | 125178.1852 | 87.45096455 |
| UIJ65950.1 | UDP-N-acetylmuramate_dehydrogenase_[Bacillus_cereus]                          | CPTF_metals_mix | 86284.33333 | 149448.8492 | 173.2050808 |
| UIJ65950.1 | UDP-N-acetylmuramate_dehydrogenase_[Bacillus_cereus]                          | CPTF_zcontrol   | 180953.6667 | 16555.28488 | 9.148908216 |
| UIJ65965.1 | SsrA-binding_protein_[Bacillus_cereus]                                        | CPTF_Al         | 335799.3333 | 37539.49394 | 11.17914487 |
| UIJ65965.1 | SsrA-binding_protein_[Bacillus_cereus]                                        | CPTF_Cd         | 330466.6667 | 31150.3079  | 9.426157323 |
| UIJ65965.1 | SsrA-binding_protein_[Bacillus_cereus]                                        | CPTF_Co         | 345592.6667 | 55033.76888 | 15.92446084 |
| UIJ65965.1 | SsrA-binding_protein_[Bacillus_cereus]                                        | CPTF_Cu         | 393669.6667 | 8627.886956 | 2.19165653  |
| UIJ65965.1 | SsrA-binding_protein_[Bacillus_cereus]                                        | CPTF_Fe         | 341371      | 51952.59457 | 15.21880727 |
| UIJ65965.1 | SsrA-binding_protein_[Bacillus_cereus]                                        | CPTF_Mn         | 326489.6667 | 59935.84609 | 18.35765484 |
| UIJ65965.1 | SsrA-binding_protein_[Bacillus_cereus]                                        | CPTF_Ni         | 342428      | 45056.89856 | 13.15806493 |
| UIJ65965.1 | SsrA-binding_protein_[Bacillus_cereus]                                        | CPTF_U          | 315106      | 93699.38591 | 29.73583045 |
| UIJ65965.1 | SsrA-binding_protein_[Bacillus_cereus]                                        | CPTF_metals_mix | 384148.4333 | 23751.00571 | 6.182767817 |
| UIJ65965.1 | SsrA-binding_protein_[Bacillus_cereus]                                        | CPTF_zcontrol   | 324540.6667 | 5971.174619 | 1.839884869 |
| UIJ65967.1 | ribonuclease_R_[Bacillus_cereus]                                              | CPTF_Al         | 679909.1667 | 252300.4284 | 37.107961   |
| UIJ65967.1 | ribonuclease_R_[Bacillus_cereus]                                              | CPTF_Cd         | 1240050.267 | 235607.3681 | 18.99982399 |
| UIJ65967.1 | ribonuclease_R_[Bacillus_cereus]                                              | CPTF_Co         | 876517.3    | 122271.0252 | 13.94964197 |
| UIJ65967.1 | ribonuclease_R_[Bacillus_cereus]                                              | CPTF_Cu         | 835890.8333 | 214983.8272 | 25.71912726 |
| UIJ65967.1 | ribonuclease_R_[Bacillus_cereus]                                              | CPTF_Fe         | 879665.3333 | 386218.8057 | 43.90519793 |
| UIJ65967.1 | ribonuclease_R_[Bacillus_cereus]                                              | CPTF_Mn         | 737096.2333 | 311427.6591 | 42.25061057 |
| UIJ65967.1 | ribonuclease_R_[Bacillus_cereus]                                              | CPTF_Ni         | 505876.6333 | 121730.9634 | 24.06336948 |
| UIJ65967.1 | ribonuclease_R_[Bacillus_cereus]                                              | CPTF_U          | 373275      | 206389.1268 | 55.29144111 |
| UIJ65967.1 | ribonuclease_R_[Bacillus_cereus]                                              | CPTF_metals_mix | 1155876.1   | 271208.098  | 23.46342294 |
| UIJ65967.1 | ribonuclease_R_[Bacillus_cereus]                                              | CPTF_zcontrol   | 620493.6667 | 181978.3288 | 29.32799134 |
| UIJ65972.1 | phosphopyruvate_hydratase_[Bacillus_cereus]                                   | CPTF_Al         | 41976777.37 | 2964880.898 | 7.063145586 |
| UIJ65972.1 | phosphopyruvate_hydratase_[Bacillus_cereus]                                   | CPTF_Cd         | 45951497.13 | 2698934.596 | 5.873442138 |
| UIJ65972.1 | phosphopyruvate_hydratase_[Bacillus_cereus]                                   | CPTF_Co         | 37253089.2  | 4098039.523 | 11.00053609 |
| UIJ65972.1 | phosphopyruvate_hydratase_[Bacillus_cereus]                                   | CPTF_Cu         | 38976855.63 | 1786684.947 | 4.583963787 |
| UIJ65972.1 | phosphopyruvate_hydratase_[Bacillus_cereus]                                   | CPTF_Fe         | 41018479.4  | 3969026.447 | 9.676191086 |
| UIJ65972.1 | phosphopyruvate_hydratase_[Bacillus_cereus]                                   | CPTF_Mn         | 44821263.9  | 10771731.03 | 24.03263562 |
| UIJ65972.1 | phosphopyruvate_hydratase_[Bacillus_cereus]                                   | CPTF_Ni         | 36595130.77 | 2158561.626 | 5.898494091 |
| UIJ65972.1 | phosphopyruvate_hydratase_[Bacillus_cereus]                                   | CPTF_U          | 34659806.33 | 409926.159  | 1.182713357 |
| UIJ65972.1 | phosphopyruvate_hydratase_[Bacillus_cereus]                                   | CPTF_metals_mix | 64133934.6  | 4018976.708 | 6.266536948 |
| UIJ65972.1 | phosphopyruvate_hydratase_[Bacillus_cereus]                                   | CPTF_zcontrol   | 34676228.17 | 903719.0003 | 2.606162919 |
| UIJ65973.1 | 2,3-bisphosphoglycerate-independent_phosphoglycerate_mutase_[Bacillus_cereus] | CPTF_Al         | 7745167.867 | 556093.8327 | 7.179880957 |
| UIJ65973.1 | 2,3-bisphosphoglycerate-independent_phosphoglycerate_mutase_[Bacillus_cereus] | CPTF_Cd         | 7345658.633 | 278280.5921 | 3.78836815  |
| UIJ65973.1 | 2,3-bisphosphoglycerate-independent_phosphoglycerate_mutase_[Bacillus_cereus] | CPTF_Co         | 6862882.2   | 474089.3819 | 6.908021558 |
| UIJ65973.1 | 2,3-bisphosphoglycerate-independent_phosphoglycerate_mutase_[Bacillus_cereus] | CPTF_Cu         | 8194312.667 | 236162.2009 | 2.882025747 |
| UIJ65973.1 | 2,3-bisphosphoglycerate-independent_phosphoglycerate_mutase_[Bacillus_cereus] | CPTF_Fe         | 7349719.7   | 498047.8009 | 6.776418982 |
| UIJ65973.1 | 2,3-bisphosphoglycerate-independent_phosphoglycerate_mutase_[Bacillus_cereus] | CPTF_Mn         | 7314686.8   | 655629.1438 | 8.963188196 |
| UIJ65973.1 | 2,3-bisphosphoglycerate-independent_phosphoglycerate_mutase_[Bacillus_cereus] | CPTF_Ni         | 7243829.367 | 246669.4818 | 3.40523595  |
| UIJ65973.1 | 2,3-bisphosphoglycerate-independent_phosphoglycerate_mutase_[Bacillus_cereus] | CPTF_U          | 5782908.933 | 156433.5855 | 2.705102005 |
| UIJ65973.1 | 2,3-bisphosphoglycerate-independent_phosphoglycerate_mutase_[Bacillus_cereus] | CPTF_metals_mix | 12835850.7  | 948142.0789 | 7.386671137 |
| UIJ65973.1 | 2,3-bisphosphoglycerate-independent_phosphoglycerate_mutase_[Bacillus_cereus] | CPTF_zcontrol   | 6900095.167 | 335657.503  | 4.8645344   |
| UIJ65974.1 | triose-phosphate_isomerase_[Bacillus_cereus]                                  | CPTF_Al         | 11990365.9  | 3036392.758 | 25.32360383 |
| UIJ65974.1 | triose-phosphate_isomerase_[Bacillus_cereus]                                  | CPTF_Cd         | 17242702.23 | 1673059.015 | 9.702997779 |
| UIJ65974.1 | triose-phosphate_isomerase_[Bacillus_cereus]                                  | CPTF_Co         | 11023816.47 | 2385623.011 | 21.64062707 |
| UIJ65974.1 | triose-phosphate_isomerase_[Bacillus_cereus]                                  | CPTF_Cu         | 11073127.03 | 1202886.231 | 10.86311235 |
| UIJ65974.1 | triose-phosphate_isomerase_[Bacillus_cereus]                                  | CPTF_Fe         | 12235821.47 | 2786030.112 | 22.76945704 |
| UIJ65974.1 | triose-phosphate_isomerase_[Bacillus_cereus]                                  | CPTF_Mn         | 14143850.47 | 9008077.308 | 63.68900272 |
| UIJ65974.1 | triose-phosphate_isomerase_[Bacillus_cereus]                                  | CPTF_Ni         | 6331542.6   | 1506230.596 | 23.78931472 |
| UIJ65974.1 | triose-phosphate_isomerase_[Bacillus_cereus]                                  | CPTF_U          | 7473765.333 | 1451255.115 | 19.41799147 |
| UIJ65974.1 | triose-phosphate_isomerase_[Bacillus_cereus]                                  | CPTF_metals_mix | 38199736.3  | 1630194.152 | 4.267553418 |
| UIJ65974.1 | triose-phosphate_isomerase_[Bacillus_cereus]                                  | CPTF_zcontrol   | 9046136.367 | 1965348.197 | 21.72582987 |
| UIJ65975.1 | phosphoglycerate_kinase_[Bacillus_cereus]                                     | CPTF_Al         | 24654229.87 | 2318654.565 | 9.404692734 |
| UIJ65975.1 | phosphoglycerate_kinase_[Bacillus_cereus]                                     | CPTF_Cd         | 29200370.13 | 1332978.579 | 4.564937268 |
| UIJ65975.1 | phosphoglycerate_kinase_[Bacillus_cereus]                                     | CPTF_Co         | 22104096.23 | 2309920.632 | 10.45019261 |
| UIJ65975.1 | phosphoglycerate_kinase_[Bacillus_cereus]                                     | CPTF_Cu         | 23960930.8  | 1979717.508 | 8.262272966 |

|            |                                                                            |                 |              |             |             |
|------------|----------------------------------------------------------------------------|-----------------|--------------|-------------|-------------|
| UIJ65975.1 | phosphoglycerate_kinase [Bacillus_cereus]                                  | CPTF_Fe         | 24738765.93  | 3255583.647 | 13.1598466  |
| UIJ65975.1 | phosphoglycerate_kinase [Bacillus_cereus]                                  | CPTF_Mn         | 26025355.23  | 7774041.516 | 29.87102941 |
| UIJ65975.1 | phosphoglycerate_kinase [Bacillus_cereus]                                  | CPTF_Ni         | 17273003.4   | 2805508.234 | 16.24215644 |
| UIJ65975.1 | phosphoglycerate_kinase [Bacillus_cereus]                                  | CPTF_U          | 17416654.67  | 2170912.744 | 12.46457937 |
| UIJ65975.1 | phosphoglycerate_kinase [Bacillus_cereus]                                  | CPTF_metals_mix | 38975852.13  | 2470302.496 | 6.338033322 |
| UIJ65975.1 | phosphoglycerate_kinase [Bacillus_cereus]                                  | CPTF_zcontrol   | 221212348.43 | 1080757.269 | 4.887573438 |
| UIJ65976.1 | type_I_glyceraldehyde-3-phosphate_dehydrogenase [Bacillus_cereus]          | CPTF_AI         | 19691539.37  | 3471704.651 | 17.63043806 |
| UIJ65976.1 | type_I_glyceraldehyde-3-phosphate_dehydrogenase [Bacillus_cereus]          | CPTF_Cd         | 28924798.07  | 3886940.137 | 13.4380891  |
| UIJ65976.1 | type_I_glyceraldehyde-3-phosphate_dehydrogenase [Bacillus_cereus]          | CPTF_Co         | 17835397     | 3553626.234 | 19.92457041 |
| UIJ65976.1 | type_I_glyceraldehyde-3-phosphate_dehydrogenase [Bacillus_cereus]          | CPTF_Cu         | 16925945.67  | 3565192.534 | 21.06347618 |
| UIJ65976.1 | type_I_glyceraldehyde-3-phosphate_dehydrogenase [Bacillus_cereus]          | CPTF_Fe         | 18831842.4   | 4362976.843 | 23.16808282 |
| UIJ65976.1 | type_I_glyceraldehyde-3-phosphate_dehydrogenase [Bacillus_cereus]          | CPTF_Mn         | 27399244     | 21310628.07 | 77.77816085 |
| UIJ65976.1 | type_I_glyceraldehyde-3-phosphate_dehydrogenase [Bacillus_cereus]          | CPTF_Ni         | 10329489.67  | 3601372.046 | 34.86495619 |
| UIJ65976.1 | type_I_glyceraldehyde-3-phosphate_dehydrogenase [Bacillus_cereus]          | CPTF_U          | 9371748.833  | 2639560.414 | 28.16507848 |
| UIJ65976.1 | type_I_glyceraldehyde-3-phosphate_dehydrogenase [Bacillus_cereus]          | CPTF_metals_mix | 62728493.4   | 4211140.222 | 6.713281307 |
| UIJ65976.1 | type_I_glyceraldehyde-3-phosphate_dehydrogenase [Bacillus_cereus]          | CPTF_zcontrol   | 15373643.67  | 2526750.398 | 16.43559882 |
| UIJ65977.1 | gapA_transcriptional_regulator_CggR [Bacillus_cereus]                      | CPTF_AI         | 250004       | 32001.46195 | 12.80037997 |
| UIJ65977.1 | gapA_transcriptional_regulator_CggR [Bacillus_cereus]                      | CPTF_Cd         | 447804       | 46925.2361  | 10.47896761 |
| UIJ65977.1 | gapA_transcriptional_regulator_CggR [Bacillus_cereus]                      | CPTF_Co         | 281814.3333  | 90350.79723 | 32.06039812 |
| UIJ65977.1 | gapA_transcriptional_regulator_CggR [Bacillus_cereus]                      | CPTF_Cu         | 402179       | 96155.8017  | 23.90870774 |
| UIJ65977.1 | gapA_transcriptional_regulator_CggR [Bacillus_cereus]                      | CPTF_Fe         | 314874.6667  | 54717.36089 | 17.37750498 |
| UIJ65977.1 | gapA_transcriptional_regulator_CggR [Bacillus_cereus]                      | CPTF_Mn         | 252283.0667  | 83381.27217 | 33.05068123 |
| UIJ65977.1 | gapA_transcriptional_regulator_CggR [Bacillus_cereus]                      | CPTF_Ni         | 260218.6667  | 31622.53447 | 12.15229287 |
| UIJ65977.1 | gapA_transcriptional_regulator_CggR [Bacillus_cereus]                      | CPTF_U          | 289454.6667  | 32947.43393 | 11.38258861 |
| UIJ65977.1 | gapA_transcriptional_regulator_CggR [Bacillus_cereus]                      | CPTF_metals_mix | 535309.6667  | 38241.23769 | 7.143759972 |
| UIJ65977.1 | gapA_transcriptional_regulator_CggR [Bacillus_cereus]                      | CPTF_zcontrol   | 258773.3333  | 77508.54149 | 29.95229087 |
| UIJ65991.1 | ATP-dependent_Clp_endopeptidase_proteolytic_subunit_ClpP [Bacillus_cereus] | CPTF_AI         | 10751371.67  | 487290.3617 | 4.532355283 |
| UIJ65991.1 | ATP-dependent_Clp_endopeptidase_proteolytic_subunit_ClpP [Bacillus_cereus] | CPTF_Cd         | 12101723.67  | 443604.2535 | 3.66562868  |
| UIJ65991.1 | ATP-dependent_Clp_endopeptidase_proteolytic_subunit_ClpP [Bacillus_cereus] | CPTF_Co         | 11244683.67  | 532241.093  | 4.733268705 |
| UIJ65991.1 | ATP-dependent_Clp_endopeptidase_proteolytic_subunit_ClpP [Bacillus_cereus] | CPTF_Cu         | 11580137     | 1138271.636 | 9.829517874 |
| UIJ65991.1 | ATP-dependent_Clp_endopeptidase_proteolytic_subunit_ClpP [Bacillus_cereus] | CPTF_Fe         | 11037713     | 214136.7883 | 1.940046714 |
| UIJ65991.1 | ATP-dependent_Clp_endopeptidase_proteolytic_subunit_ClpP [Bacillus_cereus] | CPTF_Mn         | 11724736.97  | 1122076.402 | 35.15709063 |
| UIJ65991.1 | ATP-dependent_Clp_endopeptidase_proteolytic_subunit_ClpP [Bacillus_cereus] | CPTF_Ni         | 10545205.67  | 1437355.899 | 13.63042072 |
| UIJ65991.1 | ATP-dependent_Clp_endopeptidase_proteolytic_subunit_ClpP [Bacillus_cereus] | CPTF_U          | 8561287      | 195839.2619 | 2.287497919 |
| UIJ65991.1 | ATP-dependent_Clp_endopeptidase_proteolytic_subunit_ClpP [Bacillus_cereus] | CPTF_metals_mix | 16585429.37  | 1433261.497 | 8.641690639 |
| UIJ65991.1 | ATP-dependent_Clp_endopeptidase_proteolytic_subunit_ClpP [Bacillus_cereus] | CPTF_zcontrol   | 9848393.333  | 121803.1665 | 1.236782106 |
| UIJ65995.1 | RNase_adapter_RapZ [Bacillus_cereus]                                       | CPTF_AI         | 3217837.267  | 85285.76616 | 2.65040644  |
| UIJ65995.1 | RNase_adapter_RapZ [Bacillus_cereus]                                       | CPTF_Cd         | 3127237.867  | 357220.173  | 11.42286542 |
| UIJ65995.1 | RNase_adapter_RapZ [Bacillus_cereus]                                       | CPTF_Co         | 2653020.9    | 315620.1302 | 11.89663188 |
| UIJ65995.1 | RNase_adapter_RapZ [Bacillus_cereus]                                       | CPTF_Cu         | 3051491.267  | 234544.3005 | 7.686218966 |
| UIJ65995.1 | RNase_adapter_RapZ [Bacillus_cereus]                                       | CPTF_Fe         | 2855902      | 305446.3348 | 10.69526667 |
| UIJ65995.1 | RNase_adapter_RapZ [Bacillus_cereus]                                       | CPTF_Mn         | 2505559.1    | 305643.5633 | 12.1986172  |
| UIJ65995.1 | RNase_adapter_RapZ [Bacillus_cereus]                                       | CPTF_Ni         | 2974382.333  | 104075.5277 | 3.499063538 |
| UIJ65995.1 | RNase_adapter_RapZ [Bacillus_cereus]                                       | CPTF_U          | 3417876.5    | 221448.097  | 6.47911348  |
| UIJ65995.1 | RNase_adapter_RapZ [Bacillus_cereus]                                       | CPTF_metals_mix | 3429175.533  | 323776.5299 | 9.441818501 |
| UIJ65995.1 | RNase_adapter_RapZ [Bacillus_cereus]                                       | CPTF_zcontrol   | 2532298.6    | 102100.4619 | 4.031928223 |
| UIJ65998.1 | thioredoxin-disulfide_reductase [Bacillus_cereus]                          | CPTF_AI         | 152040       | 56689.70447 | 37.28604609 |
| UIJ65998.1 | thioredoxin-disulfide_reductase [Bacillus_cereus]                          | CPTF_Cd         | 123949.7667  | 28562.47621 | 23.04359014 |
| UIJ65998.1 | thioredoxin-disulfide_reductase [Bacillus_cereus]                          | CPTF_Co         | 284561.4667  | 97757.39821 | 34.35370198 |
| UIJ65998.1 | thioredoxin-disulfide_reductase [Bacillus_cereus]                          | CPTF_Cu         | 331559.6667  | 167837.3481 | 50.62055641 |
| UIJ65998.1 | thioredoxin-disulfide_reductase [Bacillus_cereus]                          | CPTF_Fe         | 179566.6667  | 92469.76441 | 51.49606334 |
| UIJ65998.1 | thioredoxin-disulfide_reductase [Bacillus_cereus]                          | CPTF_Mn         | 384854.6333  | 355422.9401 | 92.35251686 |
| UIJ65998.1 | thioredoxin-disulfide_reductase [Bacillus_cereus]                          | CPTF_Ni         | 199893       | 92976.229   | 46.51299895 |
| UIJ65998.1 | thioredoxin-disulfide_reductase [Bacillus_cereus]                          | CPTF_U          | 234865       | 145926.1628 | 62.13193232 |
| UIJ65998.1 | thioredoxin-disulfide_reductase [Bacillus_cereus]                          | CPTF_metals_mix | 3698566.667  | 719597.1153 | 19.45610773 |
| UIJ65998.1 | thioredoxin-disulfide_reductase [Bacillus_cereus]                          | CPTF_zcontrol   | 130144.2     | 72833.25439 | 55.96350386 |
| UIJ66001.1 | pyrophosphatase_PpaX [Bacillus_cereus]                                     | CPTF_AI         | 22783.3      | 39461.83316 | 173.2050808 |
| UIJ66001.1 | pyrophosphatase_PpaX [Bacillus_cereus]                                     | CPTF_Cd         | 22651.26667  | 39233.14472 | 173.2050808 |
| UIJ66001.1 | pyrophosphatase_PpaX [Bacillus_cereus]                                     | CPTF_Co         | 30433.33333  | 41885.52541 | 137.630423  |
| UIJ66001.1 | pyrophosphatase_PpaX [Bacillus_cereus]                                     | CPTF_Cu         | 49115.43333  | 64605.82125 | 131.5387382 |
| UIJ66001.1 | pyrophosphatase_PpaX [Bacillus_cereus]                                     | CPTF_Fe         | 0            | 0           | 0           |

|            |                                                                     |                 |             |             |             |
|------------|---------------------------------------------------------------------|-----------------|-------------|-------------|-------------|
| UIJ66001.1 | pyrophosphatase_PpaX_[ <i>Bacillus_cereus</i> ]                     | CPTF_Mn         | 0           | 0           | 0           |
| UIJ66001.1 | pyrophosphatase_PpaX_[ <i>Bacillus_cereus</i> ]                     | CPTF_Ni         | 0           | 0           | 0           |
| UIJ66001.1 | pyrophosphatase_PpaX_[ <i>Bacillus_cereus</i> ]                     | CPTF_U          | 10101.93333 | 17497.06179 | 173.2050808 |
| UIJ66001.1 | pyrophosphatase_PpaX_[ <i>Bacillus_cereus</i> ]                     | CPTF_metals_mix | 112246      | 24207.08916 | 21.56610406 |
| UIJ66001.1 | pyrophosphatase_PpaX_[ <i>Bacillus_cereus</i> ]                     | CPTF_zcontrol   | 0           | 0           | 0           |
| UIJ66003.1 | HPr(Ser)_kinase/phosphatase_[ <i>Bacillus_cereus</i> ]              | CPTF_Al         | 679344.4667 | 99175.56259 | 14.5987154  |
| UIJ66003.1 | HPr(Ser)_kinase/phosphatase_[ <i>Bacillus_cereus</i> ]              | CPTF_Cd         | 467449.8333 | 159283.9271 | 34.0750848  |
| UIJ66003.1 | HPr(Ser)_kinase/phosphatase_[ <i>Bacillus_cereus</i> ]              | CPTF_Co         | 1030735.4   | 197905.3062 | 19.20039868 |
| UIJ66003.1 | HPr(Ser)_kinase/phosphatase_[ <i>Bacillus_cereus</i> ]              | CPTF_Cu         | 899181.7667 | 34822.61276 | 3.872700054 |
| UIJ66003.1 | HPr(Ser)_kinase/phosphatase_[ <i>Bacillus_cereus</i> ]              | CPTF_Fe         | 695170.0333 | 286537.1221 | 41.21827875 |
| UIJ66003.1 | HPr(Ser)_kinase/phosphatase_[ <i>Bacillus_cereus</i> ]              | CPTF_Mn         | 619364.8333 | 260166.1239 | 42.00531091 |
| UIJ66003.1 | HPr(Ser)_kinase/phosphatase_[ <i>Bacillus_cereus</i> ]              | CPTF_Ni         | 453586.6333 | 484434.5881 | 106.8008959 |
| UIJ66003.1 | HPr(Ser)_kinase/phosphatase_[ <i>Bacillus_cereus</i> ]              | CPTF_U          | 394106      | 347696.9533 | 88.22422223 |
| UIJ66003.1 | HPr(Ser)_kinase/phosphatase_[ <i>Bacillus_cereus</i> ]              | CPTF_metals_mix | 1206237.4   | 85697.31191 | 7.104514576 |
| UIJ66003.1 | HPr(Ser)_kinase/phosphatase_[ <i>Bacillus_cereus</i> ]              | CPTF_zcontrol   | 433562      | 250567.7863 | 57.79283847 |
| UIJ66005.1 | excinuclease_ABC_subunit_UvrA_[ <i>Bacillus_cereus</i> ]            | CPTF_Al         | 831080      | 156735.793  | 18.85929068 |
| UIJ66005.1 | excinuclease_ABC_subunit_UvrA_[ <i>Bacillus_cereus</i> ]            | CPTF_Cd         | 1353818.7   | 474017.8469 | 35.01339189 |
| UIJ66005.1 | excinuclease_ABC_subunit_UvrA_[ <i>Bacillus_cereus</i> ]            | CPTF_Co         | 684196.8    | 120451.1092 | 17.60474607 |
| UIJ66005.1 | excinuclease_ABC_subunit_UvrA_[ <i>Bacillus_cereus</i> ]            | CPTF_Cu         | 661491.5667 | 51542.01102 | 7.791786565 |
| UIJ66005.1 | excinuclease_ABC_subunit_UvrA_[ <i>Bacillus_cereus</i> ]            | CPTF_Fe         | 763872.6667 | 71768.17528 | 9.395306104 |
| UIJ66005.1 | excinuclease_ABC_subunit_UvrA_[ <i>Bacillus_cereus</i> ]            | CPTF_Mn         | 691707.8333 | 118466.3465 | 17.12664521 |
| UIJ66005.1 | excinuclease_ABC_subunit_UvrA_[ <i>Bacillus_cereus</i> ]            | CPTF_Ni         | 654951.7    | 15499.19361 | 2.366463604 |
| UIJ66005.1 | excinuclease_ABC_subunit_UvrA_[ <i>Bacillus_cereus</i> ]            | CPTF_U          | 590587.6667 | 281545.2166 | 47.67204472 |
| UIJ66005.1 | excinuclease_ABC_subunit_UvrA_[ <i>Bacillus_cereus</i> ]            | CPTF_metals_mix | 1801469.5   | 519577.5664 | 28.84187417 |
| UIJ66005.1 | excinuclease_ABC_subunit_UvrA_[ <i>Bacillus_cereus</i> ]            | CPTF_zcontrol   | 1143438.767 | 813880.2938 | 71.17830159 |
| UIJ66006.1 | excinuclease_ABC_subunit_B_[ <i>Bacillus_cereus</i> ]               | CPTF_Al         | 36303.6     | 32050.7452  | 88.28530836 |
| UIJ66006.1 | excinuclease_ABC_subunit_B_[ <i>Bacillus_cereus</i> ]               | CPTF_Cd         | 56268.9     | 18196.69046 | 32.33880609 |
| UIJ66006.1 | excinuclease_ABC_subunit_B_[ <i>Bacillus_cereus</i> ]               | CPTF_Co         | 43523.5     | 37896.16679 | 87.07058668 |
| UIJ66006.1 | excinuclease_ABC_subunit_B_[ <i>Bacillus_cereus</i> ]               | CPTF_Cu         | 52650.9     | 42047.17876 | 79.86032292 |
| UIJ66006.1 | excinuclease_ABC_subunit_B_[ <i>Bacillus_cereus</i> ]               | CPTF_Fe         | 85984.83333 | 28381.97572 | 33.00811855 |
| UIJ66006.1 | excinuclease_ABC_subunit_B_[ <i>Bacillus_cereus</i> ]               | CPTF_Mn         | 47163.86667 | 45101.50487 | 95.62724191 |
| UIJ66006.1 | excinuclease_ABC_subunit_B_[ <i>Bacillus_cereus</i> ]               | CPTF_Ni         | 62534.93333 | 55805.78643 | 89.23937942 |
| UIJ66006.1 | excinuclease_ABC_subunit_B_[ <i>Bacillus_cereus</i> ]               | CPTF_U          | 12112.63333 | 20979.69635 | 173.2050808 |
| UIJ66006.1 | excinuclease_ABC_subunit_B_[ <i>Bacillus_cereus</i> ]               | CPTF_metals_mix | 47285.8     | 45651.72024 | 96.54424847 |
| UIJ66006.1 | excinuclease_ABC_subunit_B_[ <i>Bacillus_cereus</i> ]               | CPTF_zcontrol   | 35426.76667 | 34983.80006 | 98.74962732 |
| UIJ66020.1 | permease-like_cell_division_protein_FtsX_[ <i>Bacillus_cereus</i> ] | CPTF_Al         | 137229      | 137059.3163 | 99.87634996 |
| UIJ66020.1 | permease-like_cell_division_protein_FtsX_[ <i>Bacillus_cereus</i> ] | CPTF_Cd         | 535491      | 20274.24911 | 3.786104549 |
| UIJ66020.1 | permease-like_cell_division_protein_FtsX_[ <i>Bacillus_cereus</i> ] | CPTF_Co         | 127725.5333 | 155747.6136 | 121.939294  |
| UIJ66020.1 | permease-like_cell_division_protein_FtsX_[ <i>Bacillus_cereus</i> ] | CPTF_Cu         | 0           | 0           | 0           |
| UIJ66020.1 | permease-like_cell_division_protein_FtsX_[ <i>Bacillus_cereus</i> ] | CPTF_Fe         | 269112.3333 | 249820.0494 | 92.83114093 |
| UIJ66020.1 | permease-like_cell_division_protein_FtsX_[ <i>Bacillus_cereus</i> ] | CPTF_Mn         | 275078.3333 | 254444.6623 | 92.49898354 |
| UIJ66020.1 | permease-like_cell_division_protein_FtsX_[ <i>Bacillus_cereus</i> ] | CPTF_Ni         | 0           | 0           | 0           |
| UIJ66020.1 | permease-like_cell_division_protein_FtsX_[ <i>Bacillus_cereus</i> ] | CPTF_U          | 0           | 0           | 0           |
| UIJ66020.1 | permease-like_cell_division_protein_FtsX_[ <i>Bacillus_cereus</i> ] | CPTF_metals_mix | 561671      | 101907.7245 | 18.14366854 |
| UIJ66020.1 | permease-like_cell_division_protein_FtsX_[ <i>Bacillus_cereus</i> ] | CPTF_zcontrol   | 153964.6667 | 162737.0755 | 105.6976766 |
| UIJ66021.1 | cytochrome_c-551_[ <i>Bacillus_cereus</i> ]                         | CPTF_Al         | 287788.8333 | 85158.16624 | 29.590504   |
| UIJ66021.1 | cytochrome_c-551_[ <i>Bacillus_cereus</i> ]                         | CPTF_Cd         | 343430.4    | 165942.5382 | 48.31911774 |
| UIJ66021.1 | cytochrome_c-551_[ <i>Bacillus_cereus</i> ]                         | CPTF_Co         | 363990.9    | 71148.80491 | 19.54686365 |
| UIJ66021.1 | cytochrome_c-551_[ <i>Bacillus_cereus</i> ]                         | CPTF_Cu         | 242709.5333 | 90456.38682 | 37.2694     |
| UIJ66021.1 | cytochrome_c-551_[ <i>Bacillus_cereus</i> ]                         | CPTF_Fe         | 192895.1667 | 216818.2263 | 112.4021043 |
| UIJ66021.1 | cytochrome_c-551_[ <i>Bacillus_cereus</i> ]                         | CPTF_Mn         | 203034.9    | 181647.6454 | 89.4662176  |
| UIJ66021.1 | cytochrome_c-551_[ <i>Bacillus_cereus</i> ]                         | CPTF_Ni         | 391599.2    | 83815.84806 | 21.40347786 |
| UIJ66021.1 | cytochrome_c-551_[ <i>Bacillus_cereus</i> ]                         | CPTF_U          | 285616.2333 | 200686.6584 | 70.26444401 |
| UIJ66021.1 | cytochrome_c-551_[ <i>Bacillus_cereus</i> ]                         | CPTF_metals_mix | 214935.7667 | 55936.73492 | 26.02486119 |
| UIJ66021.1 | cytochrome_c-551_[ <i>Bacillus_cereus</i> ]                         | CPTF_zcontrol   | 274593.9333 | 25121.22988 | 9.148501417 |
| UIJ66022.1 | peptide_chain_release_factor_2_[ <i>Bacillus_cereus</i> ]           | CPTF_Al         | 2568346.433 | 220993.266  | 8.604495996 |
| UIJ66022.1 | peptide_chain_release_factor_2_[ <i>Bacillus_cereus</i> ]           | CPTF_Cd         | 2582504.433 | 131748.8069 | 5.101590734 |
| UIJ66022.1 | peptide_chain_release_factor_2_[ <i>Bacillus_cereus</i> ]           | CPTF_Co         | 1915984.933 | 668373.5497 | 34.88407127 |
| UIJ66022.1 | peptide_chain_release_factor_2_[ <i>Bacillus_cereus</i> ]           | CPTF_Cu         | 2138831.6   | 496677.0863 | 23.22188836 |
| UIJ66022.1 | peptide_chain_release_factor_2_[ <i>Bacillus_cereus</i> ]           | CPTF_Fe         | 2575651.967 | 137912.7906 | 5.354480823 |
| UIJ66022.1 | peptide_chain_release_factor_2_[ <i>Bacillus_cereus</i> ]           | CPTF_Mn         | 2594557.5   | 433326.2479 | 16.70135458 |

|            |                                                                                  |                 |             |             |             |
|------------|----------------------------------------------------------------------------------|-----------------|-------------|-------------|-------------|
| UIJ66022.1 | peptide_chain_release_factor_2_[ <i>Bacillus_cereus</i> ]                        | CPTF_Ni         | 2088762.433 | 726250.6341 | 34.76942243 |
| UIJ66022.1 | peptide_chain_release_factor_2_[ <i>Bacillus_cereus</i> ]                        | CPTF_U          | 2728367.233 | 71198.90403 | 2.609579208 |
| UIJ66022.1 | peptide_chain_release_factor_2_[ <i>Bacillus_cereus</i> ]                        | CPTF_metals_mix | 3651471.233 | 298619.9419 | 8.178071875 |
| UIJ66022.1 | peptide_chain_release_factor_2_[ <i>Bacillus_cereus</i> ]                        | CPTF_zcontrol   | 2252430.333 | 641219.9557 | 28.46791513 |
| UIJ66023.1 | preprotein_translocase_subunit_SecA_[ <i>Bacillus_cereus</i> ]                   | CPTF_Al         | 9286654.367 | 899979.7026 | 9.691107982 |
| UIJ66023.1 | preprotein_translocase_subunit_SecA_[ <i>Bacillus_cereus</i> ]                   | CPTF_Cd         | 10656588.7  | 479137.0155 | 4.496157532 |
| UIJ66023.1 | preprotein_translocase_subunit_SecA_[ <i>Bacillus_cereus</i> ]                   | CPTF_Co         | 9499485.3   | 305283.5018 | 3.213684659 |
| UIJ66023.1 | preprotein_translocase_subunit_SecA_[ <i>Bacillus_cereus</i> ]                   | CPTF_Cu         | 9318542.2   | 270372.4434 | 2.901445715 |
| UIJ66023.1 | preprotein_translocase_subunit_SecA_[ <i>Bacillus_cereus</i> ]                   | CPTF_Fe         | 8925597.967 | 985664.9359 | 11.04312495 |
| UIJ66023.1 | preprotein_translocase_subunit_SecA_[ <i>Bacillus_cereus</i> ]                   | CPTF_Mn         | 9322346.3   | 1270128.573 | 13.62455902 |
| UIJ66023.1 | preprotein_translocase_subunit_SecA_[ <i>Bacillus_cereus</i> ]                   | CPTF_Ni         | 7540931.533 | 937132.4119 | 12.42727649 |
| UIJ66023.1 | preprotein_translocase_subunit_SecA_[ <i>Bacillus_cereus</i> ]                   | CPTF_U          | 7734005.1   | 885385.1747 | 11.44795178 |
| UIJ66023.1 | preprotein_translocase_subunit_SecA_[ <i>Bacillus_cereus</i> ]                   | CPTF_metals_mix | 14132158.73 | 656553.5756 | 4.645812349 |
| UIJ66023.1 | preprotein_translocase_subunit_SecA_[ <i>Bacillus_cereus</i> ]                   | CPTF_zcontrol   | 8320913.133 | 622821.9714 | 7.48501951  |
| UIJ66030.1 | ribosome-associated_translation_inhibitor_RaiA_[ <i>Bacillus_cereus</i> ]        | CPTF_Al         | 16982392.67 | 1311229.193 | 7.72110985  |
| UIJ66030.1 | ribosome-associated_translation_inhibitor_RaiA_[ <i>Bacillus_cereus</i> ]        | CPTF_Cd         | 17815723    | 598762.1933 | 3.360863847 |
| UIJ66030.1 | ribosome-associated_translation_inhibitor_RaiA_[ <i>Bacillus_cereus</i> ]        | CPTF_Co         | 14618831    | 1780256.171 | 12.17782852 |
| UIJ66030.1 | ribosome-associated_translation_inhibitor_RaiA_[ <i>Bacillus_cereus</i> ]        | CPTF_Cu         | 17488419.67 | 1308636.025 | 7.48287181  |
| UIJ66030.1 | ribosome-associated_translation_inhibitor_RaiA_[ <i>Bacillus_cereus</i> ]        | CPTF_Fe         | 16923418    | 1761043.452 | 10.40595613 |
| UIJ66030.1 | ribosome-associated_translation_inhibitor_RaiA_[ <i>Bacillus_cereus</i> ]        | CPTF_Mn         | 16551655.8  | 1844166.076 | 11.14188271 |
| UIJ66030.1 | ribosome-associated_translation_inhibitor_RaiA_[ <i>Bacillus_cereus</i> ]        | CPTF_Ni         | 14925627.93 | 1687077.962 | 11.30322938 |
| UIJ66030.1 | ribosome-associated_translation_inhibitor_RaiA_[ <i>Bacillus_cereus</i> ]        | CPTF_U          | 12012462.27 | 1777525.017 | 14.79734111 |
| UIJ66030.1 | ribosome-associated_translation_inhibitor_RaiA_[ <i>Bacillus_cereus</i> ]        | CPTF_metals_mix | 16605523.27 | 915562.9587 | 5.513604985 |
| UIJ66030.1 | ribosome-associated_translation_inhibitor_RaiA_[ <i>Bacillus_cereus</i> ]        | CPTF_zcontrol   | 15204680    | 948133.625  | 6.235801247 |
| UIJ66034.1 | helix-turn-helix_transcriptional_regulator_[ <i>Bacillus_cereus</i> ]            | CPTF_Al         | 1281271.333 | 54363.49063 | 4.2429335   |
| UIJ66034.1 | helix-turn-helix_transcriptional_regulator_[ <i>Bacillus_cereus</i> ]            | CPTF_Cd         | 1297830.667 | 18293.90626 | 1.409575743 |
| UIJ66034.1 | helix-turn-helix_transcriptional_regulator_[ <i>Bacillus_cereus</i> ]            | CPTF_Co         | 1090903.667 | 96956.99996 | 8.887769188 |
| UIJ66034.1 | helix-turn-helix_transcriptional_regulator_[ <i>Bacillus_cereus</i> ]            | CPTF_Cu         | 1215123     | 118247.4407 | 9.731314501 |
| UIJ66034.1 | helix-turn-helix_transcriptional_regulator_[ <i>Bacillus_cereus</i> ]            | CPTF_Fe         | 1282198     | 80192.70805 | 6.254315484 |
| UIJ66034.1 | helix-turn-helix_transcriptional_regulator_[ <i>Bacillus_cereus</i> ]            | CPTF_Mn         | 982449.8    | 311250.7419 | 31.68108354 |
| UIJ66034.1 | helix-turn-helix_transcriptional_regulator_[ <i>Bacillus_cereus</i> ]            | CPTF_Ni         | 1134898.333 | 39833.3128  | 3.50985737  |
| UIJ66034.1 | helix-turn-helix_transcriptional_regulator_[ <i>Bacillus_cereus</i> ]            | CPTF_U          | 1008504.833 | 230212.5449 | 22.82711369 |
| UIJ66034.1 | helix-turn-helix_transcriptional_regulator_[ <i>Bacillus_cereus</i> ]            | CPTF_metals_mix | 1412740.133 | 69255.31092 | 4.902197459 |
| UIJ66034.1 | helix-turn-helix_transcriptional_regulator_[ <i>Bacillus_cereus</i> ]            | CPTF_zcontrol   | 1180251.333 | 89515.89218 | 7.584477107 |
| UIJ66035.1 | DegV_family_protein_[ <i>Bacillus_cereus</i> ]                                   | CPTF_Al         | 0           | 0           | 0           |
| UIJ66035.1 | DegV_family_protein_[ <i>Bacillus_cereus</i> ]                                   | CPTF_Cd         | 0           | 0           | 0           |
| UIJ66035.1 | DegV_family_protein_[ <i>Bacillus_cereus</i> ]                                   | CPTF_Co         | 0           | 0           | 0           |
| UIJ66035.1 | DegV_family_protein_[ <i>Bacillus_cereus</i> ]                                   | CPTF_Cu         | 0           | 0           | 0           |
| UIJ66035.1 | DegV_family_protein_[ <i>Bacillus_cereus</i> ]                                   | CPTF_Fe         | 0           | 0           | 0           |
| UIJ66035.1 | DegV_family_protein_[ <i>Bacillus_cereus</i> ]                                   | CPTF_Mn         | 0           | 0           | 0           |
| UIJ66035.1 | DegV_family_protein_[ <i>Bacillus_cereus</i> ]                                   | CPTF_Ni         | 0           | 0           | 0           |
| UIJ66035.1 | DegV_family_protein_[ <i>Bacillus_cereus</i> ]                                   | CPTF_U          | 0           | 0           | 0           |
| UIJ66035.1 | DegV_family_protein_[ <i>Bacillus_cereus</i> ]                                   | CPTF_metals_mix | 126049      | 25304.14346 | 20.07484665 |
| UIJ66035.1 | DegV_family_protein_[ <i>Bacillus_cereus</i> ]                                   | CPTF_zcontrol   | 0           | 0           | 0           |
| UIJ66038.1 | UDP-N-acetylglucosamine_2-epimerase_(non-hydrolyzing)_[ <i>Bacillus_cereus</i> ] | CPTF_Al         | 2444176.867 | 296030.2096 | 12.11165254 |
| UIJ66038.1 | UDP-N-acetylglucosamine_2-epimerase_(non-hydrolyzing)_[ <i>Bacillus_cereus</i> ] | CPTF_Cd         | 2915180.033 | 399689.4515 | 13.71062668 |
| UIJ66038.1 | UDP-N-acetylglucosamine_2-epimerase_(non-hydrolyzing)_[ <i>Bacillus_cereus</i> ] | CPTF_Co         | 2797958.567 | 353282.8123 | 12.62644903 |
| UIJ66038.1 | UDP-N-acetylglucosamine_2-epimerase_(non-hydrolyzing)_[ <i>Bacillus_cereus</i> ] | CPTF_Cu         | 2796838.033 | 22695.35028 | 0.81146459  |
| UIJ66038.1 | UDP-N-acetylglucosamine_2-epimerase_(non-hydrolyzing)_[ <i>Bacillus_cereus</i> ] | CPTF_Fe         | 2411400.8   | 121302.2976 | 5.030366484 |
| UIJ66038.1 | UDP-N-acetylglucosamine_2-epimerase_(non-hydrolyzing)_[ <i>Bacillus_cereus</i> ] | CPTF_Mn         | 2490036.233 | 127813.8401 | 5.133011253 |
| UIJ66038.1 | UDP-N-acetylglucosamine_2-epimerase_(non-hydrolyzing)_[ <i>Bacillus_cereus</i> ] | CPTF_Ni         | 2277834.633 | 237204.3159 | 10.41358808 |
| UIJ66038.1 | UDP-N-acetylglucosamine_2-epimerase_(non-hydrolyzing)_[ <i>Bacillus_cereus</i> ] | CPTF_U          | 2103713.633 | 95041.22969 | 4.517783608 |
| UIJ66038.1 | UDP-N-acetylglucosamine_2-epimerase_(non-hydrolyzing)_[ <i>Bacillus_cereus</i> ] | CPTF_metals_mix | 3755393.9   | 243052.6003 | 6.472093387 |
| UIJ66038.1 | UDP-N-acetylglucosamine_2-epimerase_(non-hydrolyzing)_[ <i>Bacillus_cereus</i> ] | CPTF_zcontrol   | 2512731.2   | 821158.5724 | 32.67992105 |
| UIJ66071.1 | D-amino-acid_transaminase_[ <i>Bacillus_cereus</i> ]                             | CPTF_Al         | 926751.3333 | 12998.29827 | 1.40256591  |
| UIJ66071.1 | D-amino-acid_transaminase_[ <i>Bacillus_cereus</i> ]                             | CPTF_Cd         | 1024969     | 70713.83049 | 6.899118948 |
| UIJ66071.1 | D-amino-acid_transaminase_[ <i>Bacillus_cereus</i> ]                             | CPTF_Co         | 988593.6667 | 118635.0204 | 12.0003824  |
| UIJ66071.1 | D-amino-acid_transaminase_[ <i>Bacillus_cereus</i> ]                             | CPTF_Cu         | 844623.9667 | 30110.69558 | 3.564982379 |
| UIJ66071.1 | D-amino-acid_transaminase_[ <i>Bacillus_cereus</i> ]                             | CPTF_Fe         | 1046365.067 | 80669.37027 | 7.709486186 |
| UIJ66071.1 | D-amino-acid_transaminase_[ <i>Bacillus_cereus</i> ]                             | CPTF_Mn         | 961191.4667 | 121469.7439 | 12.63741389 |
| UIJ66071.1 | D-amino-acid_transaminase_[ <i>Bacillus_cereus</i> ]                             | CPTF_Ni         | 997216.4667 | 65493.56437 | 6.567637675 |



|            |                                                                                                                 |                 |             |             |             |
|------------|-----------------------------------------------------------------------------------------------------------------|-----------------|-------------|-------------|-------------|
| UIJ66071.1 | D-amino-acid_transaminase_[Bacillus_cereus]                                                                     | CPTF_U          | 1096774.667 | 122929.8794 | 11.2083077  |
| UIJ66071.1 | D-amino-acid_transaminase_[Bacillus_cereus]                                                                     | CPTF_metals_mix | 989107      | 142445.4487 | 14.40141953 |
| UIJ66071.1 | D-amino-acid_transaminase_[Bacillus_cereus]                                                                     | CPTF_zcontrol   | 768864      | 259144.2195 | 33.70481899 |
| UIJ66072.1 | SH3_domain-containing_protein_[Bacillus_cereus]                                                                 | CPTF_Al         | 34302.63333 | 59413.90377 | 173.2050808 |
| UIJ66072.1 | SH3_domain-containing_protein_[Bacillus_cereus]                                                                 | CPTF_Cd         | 51402.26667 | 25155.75782 | 48.93900493 |
| UIJ66072.1 | SH3_domain-containing_protein_[Bacillus_cereus]                                                                 | CPTF_Co         | 26628.03333 | 25829.55352 | 97.00135641 |
| UIJ66072.1 | SH3_domain-containing_protein_[Bacillus_cereus]                                                                 | CPTF_Cu         | 117528.8333 | 144547      | 122.9885432 |
| UIJ66072.1 | SH3_domain-containing_protein_[Bacillus_cereus]                                                                 | CPTF_Fe         | 48955.91333 | 43647.20012 | 89.15613487 |
| UIJ66072.1 | SH3_domain-containing_protein_[Bacillus_cereus]                                                                 | CPTF_Mn         | 27195.16667 | 47103.41039 | 173.2050808 |
| UIJ66072.1 | SH3_domain-containing_protein_[Bacillus_cereus]                                                                 | CPTF_Ni         | 51487.16667 | 37144.43204 | 72.14308816 |
| UIJ66072.1 | SH3_domain-containing_protein_[Bacillus_cereus]                                                                 | CPTF_U          | 46146.46667 | 47703.90205 | 103.374983  |
| UIJ66072.1 | SH3_domain-containing_protein_[Bacillus_cereus]                                                                 | CPTF_metals_mix | 377162.8333 | 98846.4198  | 26.20788982 |
| UIJ66072.1 | SH3_domain-containing_protein_[Bacillus_cereus]                                                                 | CPTF_zcontrol   | 76362.3     | 72899.56837 | 95.46539113 |
| UIJ66124.1 | chaperonin_GroEL_[Bacillus_cereus]                                                                              | CPTF_Al         | 89955192.63 | 4420767.117 | 4.91441015  |
| UIJ66124.1 | chaperonin_GroEL_[Bacillus_cereus]                                                                              | CPTF_Cd         | 101780121   | 846136.7381 | 0.831337917 |
| UIJ66124.1 | chaperonin_GroEL_[Bacillus_cereus]                                                                              | CPTF_Co         | 84622683.97 | 6612467.235 | 7.814059925 |
| UIJ66124.1 | chaperonin_GroEL_[Bacillus_cereus]                                                                              | CPTF_Cu         | 87067757.87 | 3302074.084 | 3.792533729 |
| UIJ66124.1 | chaperonin_GroEL_[Bacillus_cereus]                                                                              | CPTF_Fe         | 90731687.77 | 7897445.901 | 8.704176121 |
| UIJ66124.1 | chaperonin_GroEL_[Bacillus_cereus]                                                                              | CPTF_Mn         | 98682439.67 | 24040906.77 | 24.36188936 |
| UIJ66124.1 | chaperonin_GroEL_[Bacillus_cereus]                                                                              | CPTF_Ni         | 75083543.73 | 4942664     | 6.58285882  |
| UIJ66124.1 | chaperonin_GroEL_[Bacillus_cereus]                                                                              | CPTF_U          | 78875619.23 | 5280549.472 | 6.694780369 |
| UIJ66124.1 | chaperonin_GroEL_[Bacillus_cereus]                                                                              | CPTF_metals_mix | 127718465.7 | 12312873.38 | 9.640636776 |
| UIJ66124.1 | chaperonin_GroEL_[Bacillus_cereus]                                                                              | CPTF_zcontrol   | 80095832.47 | 2495525.076 | 3.115674061 |
| UIJ66125.1 | co-chaperone_GroES_[Bacillus_cereus]                                                                            | CPTF_Al         | 30016260.33 | 790132.1767 | 2.632347161 |
| UIJ66125.1 | co-chaperone_GroES_[Bacillus_cereus]                                                                            | CPTF_Cd         | 31775831.13 | 1107278.071 | 3.484654944 |
| UIJ66125.1 | co-chaperone_GroES_[Bacillus_cereus]                                                                            | CPTF_Co         | 29520022.4  | 1060949.869 | 3.594000896 |
| UIJ66125.1 | co-chaperone_GroES_[Bacillus_cereus]                                                                            | CPTF_Cu         | 30479457.33 | 1643375.801 | 5.391748886 |
| UIJ66125.1 | co-chaperone_GroES_[Bacillus_cereus]                                                                            | CPTF_Fe         | 29910617.6  | 3064897.999 | 10.24685628 |
| UIJ66125.1 | co-chaperone_GroES_[Bacillus_cereus]                                                                            | CPTF_Mn         | 31519638.83 | 1884454.125 | 5.978666617 |
| UIJ66125.1 | co-chaperone_GroES_[Bacillus_cereus]                                                                            | CPTF_Ni         | 24721366.97 | 2340298.786 | 9.466704608 |
| UIJ66125.1 | co-chaperone_GroES_[Bacillus_cereus]                                                                            | CPTF_U          | 22525862.33 | 1679207.042 | 7.454573847 |
| UIJ66125.1 | co-chaperone_GroES_[Bacillus_cereus]                                                                            | CPTF_metals_mix | 30879965.3  | 656015.2598 | 2.124404135 |
| UIJ66125.1 | co-chaperone_GroES_[Bacillus_cereus]                                                                            | CPTF_zcontrol   | 30967874.1  | 1731866.397 | 5.592461372 |
| UIJ66128.1 | redox-sensing_transcriptional_repressor_Rex_[Bacillus_cereus]                                                   | CPTF_Al         | 304436.6667 | 81222.02562 | 26.67944913 |
| UIJ66128.1 | redox-sensing_transcriptional_repressor_Rex_[Bacillus_cereus]                                                   | CPTF_Cd         | 365468.2    | 222583.1872 | 60.9035717  |
| UIJ66128.1 | redox-sensing_transcriptional_repressor_Rex_[Bacillus_cereus]                                                   | CPTF_Co         | 337085.0667 | 198294.3542 | 58.82620555 |
| UIJ66128.1 | redox-sensing_transcriptional_repressor_Rex_[Bacillus_cereus]                                                   | CPTF_Cu         | 381204.6667 | 342859.8558 | 89.94114862 |
| UIJ66128.1 | redox-sensing_transcriptional_repressor_Rex_[Bacillus_cereus]                                                   | CPTF_Fe         | 171775.9333 | 181620.9785 | 105.7313298 |
| UIJ66128.1 | redox-sensing_transcriptional_repressor_Rex_[Bacillus_cereus]                                                   | CPTF_Mn         | 370125.6667 | 345677.4069 | 93.39460568 |
| UIJ66128.1 | redox-sensing_transcriptional_repressor_Rex_[Bacillus_cereus]                                                   | CPTF_Ni         | 338018.9333 | 296264.0668 | 87.64718113 |
| UIJ66128.1 | redox-sensing_transcriptional_repressor_Rex_[Bacillus_cereus]                                                   | CPTF_U          | 430078.3    | 120684.7094 | 28.06110176 |
| UIJ66128.1 | redox-sensing_transcriptional_repressor_Rex_[Bacillus_cereus]                                                   | CPTF_metals_mix | 1424498     | 135947.4749 | 9.54353568  |
| UIJ66128.1 | redox-sensing_transcriptional_repressor_Rex_[Bacillus_cereus]                                                   | CPTF_zcontrol   | 386461.6667 | 45353.76053 | 11.73564274 |
| UIJ66129.1 | ATP-binding_cassette_domain-containing_protein_[Bacillus_cereus]                                                | CPTF_Al         | 20772       | 219258.3784 | 105.5283572 |
| UIJ66129.1 | ATP-binding_cassette_domain-containing_protein_[Bacillus_cereus]                                                | CPTF_Cd         | 31021.63333 | 29615.01345 | 95.46568078 |
| UIJ66129.1 | ATP-binding_cassette_domain-containing_protein_[Bacillus_cereus]                                                | CPTF_Co         | 31015.16667 | 26951.40579 | 86.89750431 |
| UIJ66129.1 | ATP-binding_cassette_domain-containing_protein_[Bacillus_cereus]                                                | CPTF_Cu         | 40713.63333 | 19248.96784 | 47.27892421 |
| UIJ66129.1 | ATP-binding_cassette_domain-containing_protein_[Bacillus_cereus]                                                | CPTF_Fe         | 15219.73333 | 26361.35141 | 173.2050808 |
| UIJ66129.1 | ATP-binding_cassette_domain-containing_protein_[Bacillus_cereus]                                                | CPTF_Mn         | 199558.8667 | 305239.6131 | 152.9571791 |
| UIJ66129.1 | ATP-binding_cassette_domain-containing_protein_[Bacillus_cereus]                                                | CPTF_Ni         | 445354.3    | 391752.3263 | 87.96419532 |
| UIJ66129.1 | ATP-binding_cassette_domain-containing_protein_[Bacillus_cereus]                                                | CPTF_U          | 741206.6667 | 417285.3101 | 56.29810536 |
| UIJ66129.1 | ATP-binding_cassette_domain-containing_protein_[Bacillus_cereus]                                                | CPTF_metals_mix | 55868       | 34556.95874 | 61.85465514 |
| UIJ66129.1 | ATP-binding_cassette_domain-containing_protein_[Bacillus_cereus]                                                | CPTF_zcontrol   | 152001.3    | 218375.5742 | 143.6669122 |
| UIJ66132.1 | tRNA_(adenosine(37)-N6)-threonylcarbamoyltransferase_complex_dimerization_subunit_type_1_TsaB_[Bacillus_cereus] | CPTF_Al         | 15477.13333 | 26807.18129 | 173.2050808 |
| UIJ66132.1 | tRNA_(adenosine(37)-N6)-threonylcarbamoyltransferase_complex_dimerization_subunit_type_1_TsaB_[Bacillus_cereus] | CPTF_Cd         | 16104.4     | 27893.63903 | 173.2050808 |
| UIJ66132.1 | tRNA_(adenosine(37)-N6)-threonylcarbamoyltransferase_complex_dimerization_subunit_type_1_TsaB_[Bacillus_cereus] | CPTF_Co         | 0           | 0           | 0           |
| UIJ66132.1 | tRNA_(adenosine(37)-N6)-threonylcarbamoyltransferase_complex_dimerization_subunit_type_1_TsaB_[Bacillus_cereus] | CPTF_Cu         | 0           | 0           | 0           |
| UIJ66132.1 | tRNA_(adenosine(37)-N6)-threonylcarbamoyltransferase_complex_dimerization_subunit_type_1_TsaB_[Bacillus_cereus] | CPTF_Fe         | 0           | 0           | 0           |
| UIJ66132.1 | tRNA_(adenosine(37)-N6)-threonylcarbamoyltransferase_complex_dimerization_subunit_type_1_TsaB_[Bacillus_cereus] | CPTF_Mn         | 0           | 0           | 0           |
| UIJ66132.1 | tRNA_(adenosine(37)-N6)-threonylcarbamoyltransferase_complex_dimerization_subunit_type_1_TsaB_[Bacillus_cereus] | CPTF_Ni         | 0           | 0           | 0           |
| UIJ66132.1 | tRNA_(adenosine(37)-N6)-threonylcarbamoyltransferase_complex_dimerization_subunit_type_1_TsaB_[Bacillus_cereus] | CPTF_U          | 29643.23333 | 29781.29697 | 100.4657509 |

|            |                                                                                                                 |                 |             |             |             |
|------------|-----------------------------------------------------------------------------------------------------------------|-----------------|-------------|-------------|-------------|
| UIJ66132.1 | tRNA_(adenosine(37)-N6)-threonylcarbamoyltransferase_complex_dimerization_subunit_type_1_TsaB_[Bacillus_cereus] | CPTF_metals_mix | 194734.5667 | 14683.17078 | 7.540094719 |
| UIJ66132.1 | tRNA_(adenosine(37)-N6)-threonylcarbamoyltransferase_complex_dimerization_subunit_type_1_TsaB_[Bacillus_cereus] | CPTF_zcontrol   | 0           | 0           | 0           |
| UIJ66133.1 | tRNA_(adenosine(37)-N6)-threonylcarbamoyltransferase_complex_ATPase_subunit_type_1_TsaE_[Bacillus_cereus]       | CPTF_Al         | 8292.966667 | 14363.83961 | 173.2050808 |
| UIJ66133.1 | tRNA_(adenosine(37)-N6)-threonylcarbamoyltransferase_complex_ATPase_subunit_type_1_TsaE_[Bacillus_cereus]       | CPTF_Cd         | 0           | 0           | 0           |
| UIJ66133.1 | tRNA_(adenosine(37)-N6)-threonylcarbamoyltransferase_complex_ATPase_subunit_type_1_TsaE_[Bacillus_cereus]       | CPTF_Co         | 43471.8     | 52811.32042 | 121.4840895 |
| UIJ66133.1 | tRNA_(adenosine(37)-N6)-threonylcarbamoyltransferase_complex_ATPase_subunit_type_1_TsaE_[Bacillus_cereus]       | CPTF_Cu         | 13896.56667 | 12058.82553 | 86.77557428 |
| UIJ66133.1 | tRNA_(adenosine(37)-N6)-threonylcarbamoyltransferase_complex_ATPase_subunit_type_1_TsaE_[Bacillus_cereus]       | CPTF_Fe         | 19585.93333 | 33923.83165 | 173.2050808 |
| UIJ66133.1 | tRNA_(adenosine(37)-N6)-threonylcarbamoyltransferase_complex_ATPase_subunit_type_1_TsaE_[Bacillus_cereus]       | CPTF_Mn         | 22620.23333 | 39179.39341 | 173.2050808 |
| UIJ66133.1 | tRNA_(adenosine(37)-N6)-threonylcarbamoyltransferase_complex_ATPase_subunit_type_1_TsaE_[Bacillus_cereus]       | CPTF_Ni         | 34194.66667 | 30301.07007 | 88.61343894 |
| UIJ66133.1 | tRNA_(adenosine(37)-N6)-threonylcarbamoyltransferase_complex_ATPase_subunit_type_1_TsaE_[Bacillus_cereus]       | CPTF_U          | 0           | 0           | 0           |
| UIJ66133.1 | tRNA_(adenosine(37)-N6)-threonylcarbamoyltransferase_complex_ATPase_subunit_type_1_TsaE_[Bacillus_cereus]       | CPTF_metals_mix | 9920.433333 | 17182.69457 | 173.2050808 |
| UIJ66133.1 | tRNA_(adenosine(37)-N6)-threonylcarbamoyltransferase_complex_ATPase_subunit_type_1_TsaE_[Bacillus_cereus]       | CPTF_zcontrol   | 17855.83333 | 30927.21054 | 173.2050808 |
| UIJ66136.1 | RNA-binding_transcriptional_accessory_protein_[Bacillus_cereus]                                                 | CPTF_Al         | 642841.8667 | 347465.503  | 54.05147378 |
| UIJ66136.1 | RNA-binding_transcriptional_accessory_protein_[Bacillus_cereus]                                                 | CPTF_Cd         | 597301.0667 | 194168.5048 | 32.50764407 |
| UIJ66136.1 | RNA-binding_transcriptional_accessory_protein_[Bacillus_cereus]                                                 | CPTF_Co         | 894327.6667 | 70859.30138 | 7.923192362 |
| UIJ66136.1 | RNA-binding_transcriptional_accessory_protein_[Bacillus_cereus]                                                 | CPTF_Cu         | 755304      | 259743.9035 | 34.3893192  |
| UIJ66136.1 | RNA-binding_transcriptional_accessory_protein_[Bacillus_cereus]                                                 | CPTF_Fe         | 527451.3    | 235815.5419 | 44.70849572 |
| UIJ66136.1 | RNA-binding_transcriptional_accessory_protein_[Bacillus_cereus]                                                 | CPTF_Mn         | 664986.2333 | 458361.2567 | 68.9279317  |
| UIJ66136.1 | RNA-binding_transcriptional_accessory_protein_[Bacillus_cereus]                                                 | CPTF_Ni         | 474223.8    | 76526.91697 | 16.13729993 |
| UIJ66136.1 | RNA-binding_transcriptional_accessory_protein_[Bacillus_cereus]                                                 | CPTF_U          | 455423.4    | 523548.3028 | 114.9585864 |
| UIJ66136.1 | RNA-binding_transcriptional_accessory_protein_[Bacillus_cereus]                                                 | CPTF_metals_mix | 1818728.333 | 83375.20539 | 4.584258345 |
| UIJ66136.1 | RNA-binding_transcriptional_accessory_protein_[Bacillus_cereus]                                                 | CPTF_zcontrol   | 474173.5    | 177232.7772 | 37.37719994 |
| UIJ66138.1 | type_II_toxin-antitoxin_system_endoribonuclease_NdoA_[Bacillus_cereus]                                          | CPTF_Al         | 0           | 0           | 0           |
| UIJ66138.1 | type_II_toxin-antitoxin_system_endoribonuclease_NdoA_[Bacillus_cereus]                                          | CPTF_Cd         | 0           | 0           | 0           |
| UIJ66138.1 | type_II_toxin-antitoxin_system_endoribonuclease_NdoA_[Bacillus_cereus]                                          | CPTF_Co         | 0           | 0           | 0           |
| UIJ66138.1 | type_II_toxin-antitoxin_system_endoribonuclease_NdoA_[Bacillus_cereus]                                          | CPTF_Cu         | 0           | 0           | 0           |
| UIJ66138.1 | type_II_toxin-antitoxin_system_endoribonuclease_NdoA_[Bacillus_cereus]                                          | CPTF_Fe         | 0           | 0           | 0           |
| UIJ66138.1 | type_II_toxin-antitoxin_system_endoribonuclease_NdoA_[Bacillus_cereus]                                          | CPTF_Mn         | 0           | 0           | 0           |
| UIJ66138.1 | type_II_toxin-antitoxin_system_endoribonuclease_NdoA_[Bacillus_cereus]                                          | CPTF_Ni         | 0           | 0           | 0           |
| UIJ66138.1 | type_II_toxin-antitoxin_system_endoribonuclease_NdoA_[Bacillus_cereus]                                          | CPTF_U          | 0           | 0           | 0           |
| UIJ66138.1 | type_II_toxin-antitoxin_system_endoribonuclease_NdoA_[Bacillus_cereus]                                          | CPTF_metals_mix | 5257.3      | 9105.910711 | 173.2050808 |
| UIJ66138.1 | type_II_toxin-antitoxin_system_endoribonuclease_NdoA_[Bacillus_cereus]                                          | CPTF_zcontrol   | 0           | 0           | 0           |
| UIJ66146.1 | DEAD/DEAH_box_helicase_[Bacillus_cereus]                                                                        | CPTF_Al         | 5711002.733 | 1011037.944 | 17.70333497 |
| UIJ66146.1 | DEAD/DEAH_box_helicase_[Bacillus_cereus]                                                                        | CPTF_Cd         | 6747243.033 | 595844.4149 | 8.830931566 |
| UIJ66146.1 | DEAD/DEAH_box_helicase_[Bacillus_cereus]                                                                        | CPTF_Co         | 5914275.533 | 179715.7056 | 3.038676581 |
| UIJ66146.1 | DEAD/DEAH_box_helicase_[Bacillus_cereus]                                                                        | CPTF_Cu         | 5512834.8   | 420765.5936 | 7.632472382 |
| UIJ66146.1 | DEAD/DEAH_box_helicase_[Bacillus_cereus]                                                                        | CPTF_Fe         | 5741917.633 | 642812.5622 | 11.19508504 |
| UIJ66146.1 | DEAD/DEAH_box_helicase_[Bacillus_cereus]                                                                        | CPTF_Mn         | 5745846.9   | 915516.3092 | 15.93353121 |
| UIJ66146.1 | DEAD/DEAH_box_helicase_[Bacillus_cereus]                                                                        | CPTF_Ni         | 3813598.867 | 380134.7909 | 9.96787556  |
| UIJ66146.1 | DEAD/DEAH_box_helicase_[Bacillus_cereus]                                                                        | CPTF_U          | 4298290.033 | 697186.7038 | 16.22009446 |
| UIJ66146.1 | DEAD/DEAH_box_helicase_[Bacillus_cereus]                                                                        | CPTF_metals_mix | 6231088.367 | 389921.5355 | 6.257679439 |
| UIJ66146.1 | DEAD/DEAH_box_helicase_[Bacillus_cereus]                                                                        | CPTF_zcontrol   | 5319752.9   | 921833.5481 | 17.32850314 |
| UIJ66147.1 | UDP-N-acetylmuramoyl-tripeptide--D-alanyl-D-alanine_ligase_[Bacillus_cereus]                                    | CPTF_Al         | 162340.2667 | 90237.81894 | 55.58560472 |
| UIJ66147.1 | UDP-N-acetylmuramoyl-tripeptide--D-alanyl-D-alanine_ligase_[Bacillus_cereus]                                    | CPTF_Cd         | 220012.6667 | 22882.83475 | 10.4006897  |
| UIJ66147.1 | UDP-N-acetylmuramoyl-tripeptide--D-alanyl-D-alanine_ligase_[Bacillus_cereus]                                    | CPTF_Co         | 262181      | 26526.33976 | 10.11756754 |
| UIJ66147.1 | UDP-N-acetylmuramoyl-tripeptide--D-alanyl-D-alanine_ligase_[Bacillus_cereus]                                    | CPTF_Cu         | 285281      | 101414.3874 | 35.54894556 |
| UIJ66147.1 | UDP-N-acetylmuramoyl-tripeptide--D-alanyl-D-alanine_ligase_[Bacillus_cereus]                                    | CPTF_Fe         | 231993      | 60659.9297  | 26.14731035 |
| UIJ66147.1 | UDP-N-acetylmuramoyl-tripeptide--D-alanyl-D-alanine_ligase_[Bacillus_cereus]                                    | CPTF_Mn         | 143054.5667 | 130418.584  | 91.16701903 |
| UIJ66147.1 | UDP-N-acetylmuramoyl-tripeptide--D-alanyl-D-alanine_ligase_[Bacillus_cereus]                                    | CPTF_Ni         | 277643.6667 | 110919.5348 | 39.95032055 |
| UIJ66147.1 | UDP-N-acetylmuramoyl-tripeptide--D-alanyl-D-alanine_ligase_[Bacillus_cereus]                                    | CPTF_U          | 310186.6667 | 64895.40767 | 20.92140464 |
| UIJ66147.1 | UDP-N-acetylmuramoyl-tripeptide--D-alanyl-D-alanine_ligase_[Bacillus_cereus]                                    | CPTF_metals_mix | 201680.9    | 57420.41017 | 28.47092123 |
| UIJ66147.1 | UDP-N-acetylmuramoyl-tripeptide--D-alanyl-D-alanine_ligase_[Bacillus_cereus]                                    | CPTF_zcontrol   | 298246.9667 | 108070.0672 | 36.23509349 |
| UIJ66148.1 | D-alanine--D-alanine_ligase_[Bacillus_cereus]                                                                   | CPTF_Al         | 846812.0667 | 68398.30906 | 8.077153332 |
| UIJ66148.1 | D-alanine--D-alanine_ligase_[Bacillus_cereus]                                                                   | CPTF_Cd         | 803908      | 84571.65859 | 10.5200668  |
| UIJ66148.1 | D-alanine--D-alanine_ligase_[Bacillus_cereus]                                                                   | CPTF_Co         | 814699.9333 | 62160.65353 | 7.629883223 |
| UIJ66148.1 | D-alanine--D-alanine_ligase_[Bacillus_cereus]                                                                   | CPTF_Cu         | 833398.8    | 191897.0142 | 23.0258328  |
| UIJ66148.1 | D-alanine--D-alanine_ligase_[Bacillus_cereus]                                                                   | CPTF_Fe         | 806961.7667 | 58589.41999 | 7.260495157 |
| UIJ66148.1 | D-alanine--D-alanine_ligase_[Bacillus_cereus]                                                                   | CPTF_Mn         | 837510.1667 | 220712.5354 | 26.35341566 |
| UIJ66148.1 | D-alanine--D-alanine_ligase_[Bacillus_cereus]                                                                   | CPTF_Ni         | 785851.9    | 49940.52434 | 6.354953693 |
| UIJ66148.1 | D-alanine--D-alanine_ligase_[Bacillus_cereus]                                                                   | CPTF_U          | 1033136.533 | 162555.5221 | 15.73417616 |
| UIJ66148.1 | D-alanine--D-alanine_ligase_[Bacillus_cereus]                                                                   | CPTF_metals_mix | 1683172.967 | 215826.1744 | 12.82257847 |

|            |                                                                  |                 |             |             |             |
|------------|------------------------------------------------------------------|-----------------|-------------|-------------|-------------|
| UIJ66148.1 | D-alanine--D-alanine_ligase [Bacillus cereus]                    | CPTF_zcontrol   | 778800.2667 | 98055.82375 | 12.59062534 |
| UIJ66150.1 | homogentisate_1,2-dioxygenase [Bacillus cereus]                  | CPTF_Al         | 362453.4667 | 136085.8365 | 37.54574009 |
| UIJ66150.1 | homogentisate_1,2-dioxygenase [Bacillus cereus]                  | CPTF_Cd         | 438598.2333 | 44182.02329 | 10.0734613  |
| UIJ66150.1 | homogentisate_1,2-dioxygenase [Bacillus cereus]                  | CPTF_Co         | 333823.2667 | 79004.49415 | 23.66656313 |
| UIJ66150.1 | homogentisate_1,2-dioxygenase [Bacillus cereus]                  | CPTF_Cu         | 209354.1667 | 29214.44262 | 13.95455514 |
| UIJ66150.1 | homogentisate_1,2-dioxygenase [Bacillus cereus]                  | CPTF_Fe         | 464740.8    | 22586.5977  | 4.860041921 |
| UIJ66150.1 | homogentisate_1,2-dioxygenase [Bacillus cereus]                  | CPTF_Mn         | 271503.3333 | 138286.3438 | 50.93357127 |
| UIJ66150.1 | homogentisate_1,2-dioxygenase [Bacillus cereus]                  | CPTF_Ni         | 393332.4    | 159485.118  | 40.54716011 |
| UIJ66150.1 | homogentisate_1,2-dioxygenase [Bacillus cereus]                  | CPTF_U          | 317094.5667 | 136430.6983 | 43.02523998 |
| UIJ66150.1 | homogentisate_1,2-dioxygenase [Bacillus cereus]                  | CPTF_metals_mix | 95264.73333 | 91907.23076 | 96.47560808 |
| UIJ66150.1 | homogentisate_1,2-dioxygenase [Bacillus cereus]                  | CPTF_zcontrol   | 310322.7333 | 65598.35472 | 21.13875255 |
| UIJ66151.1 | fumarylacetoacetate_hydrolase_family_protein [Bacillus cereus]   | CPTF_Al         | 346536.3333 | 38767.32048 | 11.18708682 |
| UIJ66151.1 | fumarylacetoacetate_hydrolase_family_protein [Bacillus cereus]   | CPTF_Cd         | 481663.3333 | 7030.373414 | 1.459603197 |
| UIJ66151.1 | fumarylacetoacetate_hydrolase_family_protein [Bacillus cereus]   | CPTF_Co         | 292643.6667 | 39694.31856 | 13.56404498 |
| UIJ66151.1 | fumarylacetoacetate_hydrolase_family_protein [Bacillus cereus]   | CPTF_Cu         | 254654.3333 | 15222.90959 | 5.977871803 |
| UIJ66151.1 | fumarylacetoacetate_hydrolase_family_protein [Bacillus cereus]   | CPTF_Fe         | 290068.6667 | 51479.2653  | 17.74726857 |
| UIJ66151.1 | fumarylacetoacetate_hydrolase_family_protein [Bacillus cereus]   | CPTF_Mn         | 342681.6667 | 28757.70301 | 8.391958428 |
| UIJ66151.1 | fumarylacetoacetate_hydrolase_family_protein [Bacillus cereus]   | CPTF_Ni         | 243877      | 23533.41546 | 9.649706801 |
| UIJ66151.1 | fumarylacetoacetate_hydrolase_family_protein [Bacillus cereus]   | CPTF_U          | 288337.6667 | 25623.82712 | 8.8867429   |
| UIJ66151.1 | fumarylacetoacetate_hydrolase_family_protein [Bacillus cereus]   | CPTF_metals_mix | 140746.6667 | 123652.1659 | 87.85441875 |
| UIJ66151.1 | fumarylacetoacetate_hydrolase_family_protein [Bacillus cereus]   | CPTF_zcontrol   | 327336.3333 | 28054.84682 | 8.570648586 |
| UIJ66152.1 | 4-hydroxyphenylpyruvate_dioxygenase [Bacillus cereus]            | CPTF_Al         | 7208559.167 | 831598.6393 | 11.5362671  |
| UIJ66152.1 | 4-hydroxyphenylpyruvate_dioxygenase [Bacillus cereus]            | CPTF_Cd         | 8499086.3   | 705296.7129 | 8.298500427 |
| UIJ66152.1 | 4-hydroxyphenylpyruvate_dioxygenase [Bacillus cereus]            | CPTF_Co         | 6326920.267 | 562998.4488 | 8.898459678 |
| UIJ66152.1 | 4-hydroxyphenylpyruvate_dioxygenase [Bacillus cereus]            | CPTF_Cu         | 5134521.267 | 383896.8488 | 7.476779799 |
| UIJ66152.1 | 4-hydroxyphenylpyruvate_dioxygenase [Bacillus cereus]            | CPTF_Fe         | 7383599.1   | 507995.2998 | 6.880049864 |
| UIJ66152.1 | 4-hydroxyphenylpyruvate_dioxygenase [Bacillus cereus]            | CPTF_Mn         | 7370876.4   | 297068.8702 | 4.030305951 |
| UIJ66152.1 | 4-hydroxyphenylpyruvate_dioxygenase [Bacillus cereus]            | CPTF_Ni         | 7220006.333 | 934059.6008 | 12.93710224 |
| UIJ66152.1 | 4-hydroxyphenylpyruvate_dioxygenase [Bacillus cereus]            | CPTF_U          | 6248141     | 1488113.367 | 23.81689797 |
| UIJ66152.1 | 4-hydroxyphenylpyruvate_dioxygenase [Bacillus cereus]            | CPTF_metals_mix | 3488437     | 394444.2035 | 11.30719011 |
| UIJ66152.1 | 4-hydroxyphenylpyruvate_dioxygenase [Bacillus cereus]            | CPTF_zcontrol   | 6442272.667 | 259204.6797 | 4.0234975   |
| UIJ66163.1 | ABC_transporter_substrate-binding_protein [Bacillus cereus]      | CPTF_Al         | 445091.7667 | 88860.68934 | 19.96457719 |
| UIJ66163.1 | ABC_transporter_substrate-binding_protein [Bacillus cereus]      | CPTF_Cd         | 574143.9667 | 271296.6954 | 47.25238114 |
| UIJ66163.1 | ABC_transporter_substrate-binding_protein [Bacillus cereus]      | CPTF_Co         | 721391.5333 | 696376.7519 | 96.53242653 |
| UIJ66163.1 | ABC_transporter_substrate-binding_protein [Bacillus cereus]      | CPTF_Cu         | 78869.06667 | 89701.93511 | 113.7352563 |
| UIJ66163.1 | ABC_transporter_substrate-binding_protein [Bacillus cereus]      | CPTF_Fe         | 559684      | 264674.8986 | 47.29005986 |
| UIJ66163.1 | ABC_transporter_substrate-binding_protein [Bacillus cereus]      | CPTF_Mn         | 1083128.467 | 384183.033  | 35.4697568  |
| UIJ66163.1 | ABC_transporter_substrate-binding_protein [Bacillus cereus]      | CPTF_Ni         | 904567.1333 | 957376.9982 | 105.8381366 |
| UIJ66163.1 | ABC_transporter_substrate-binding_protein [Bacillus cereus]      | CPTF_U          | 632436.1667 | 981907.245  | 155.2579212 |
| UIJ66163.1 | ABC_transporter_substrate-binding_protein [Bacillus cereus]      | CPTF_metals_mix | 59122.36667 | 36675.02912 | 62.03241038 |
| UIJ66163.1 | ABC_transporter_substrate-binding_protein [Bacillus cereus]      | CPTF_zcontrol   | 991625.1667 | 807708.32   | 81.45298719 |
| UIJ66176.1 | 1-acyl-sn-glycerol-3-phosphate_acyltransferase [Bacillus cereus] | CPTF_Al         | 134475.7667 | 41509.4951  | 30.86763967 |
| UIJ66176.1 | 1-acyl-sn-glycerol-3-phosphate_acyltransferase [Bacillus cereus] | CPTF_Cd         | 116842.3333 | 112310.9958 | 96.12183579 |
| UIJ66176.1 | 1-acyl-sn-glycerol-3-phosphate_acyltransferase [Bacillus cereus] | CPTF_Co         | 109285      | 105902.8624 | 96.90521333 |
| UIJ66176.1 | 1-acyl-sn-glycerol-3-phosphate_acyltransferase [Bacillus cereus] | CPTF_Cu         | 56238.66667 | 97408.22802 | 173.2050808 |
| UIJ66176.1 | 1-acyl-sn-glycerol-3-phosphate_acyltransferase [Bacillus cereus] | CPTF_Fe         | 135711.8667 | 72815.92365 | 53.65479485 |
| UIJ66176.1 | 1-acyl-sn-glycerol-3-phosphate_acyltransferase [Bacillus cereus] | CPTF_Mn         | 108725.6667 | 94162.20423 | 86.60531328 |
| UIJ66176.1 | 1-acyl-sn-glycerol-3-phosphate_acyltransferase [Bacillus cereus] | CPTF_Ni         | 85374.66667 | 74805.45906 | 87.62020663 |
| UIJ66176.1 | 1-acyl-sn-glycerol-3-phosphate_acyltransferase [Bacillus cereus] | CPTF_U          | 125024.6667 | 108588.6157 | 86.85375344 |
| UIJ66176.1 | 1-acyl-sn-glycerol-3-phosphate_acyltransferase [Bacillus cereus] | CPTF_metals_mix | 243368      | 74557.69797 | 30.6357853  |
| UIJ66176.1 | 1-acyl-sn-glycerol-3-phosphate_acyltransferase [Bacillus cereus] | CPTF_zcontrol   | 133326.3333 | 28407.65052 | 21.3068565  |
| UIJ66187.1 | aldo/keto_reductase [Bacillus cereus]                            | CPTF_Al         | 611580.8    | 25933.41056 | 4.240389915 |
| UIJ66187.1 | aldo/keto_reductase [Bacillus cereus]                            | CPTF_Cd         | 546455.4333 | 41760.49161 | 7.642067233 |
| UIJ66187.1 | aldo/keto_reductase [Bacillus cereus]                            | CPTF_Co         | 630072.2333 | 33211.05867 | 5.270992263 |
| UIJ66187.1 | aldo/keto_reductase [Bacillus cereus]                            | CPTF_Cu         | 588270.2333 | 185598.7356 | 31.5499111  |
| UIJ66187.1 | aldo/keto_reductase [Bacillus cereus]                            | CPTF_Fe         | 416101.6667 | 96467.04106 | 23.18352672 |
| UIJ66187.1 | aldo/keto_reductase [Bacillus cereus]                            | CPTF_Mn         | 462691      | 23920.47252 | 5.169859047 |
| UIJ66187.1 | aldo/keto_reductase [Bacillus cereus]                            | CPTF_Ni         | 513685.3667 | 104535.5786 | 20.35011806 |
| UIJ66187.1 | aldo/keto_reductase [Bacillus cereus]                            | CPTF_U          | 401509.7333 | 175187.7023 | 43.63224296 |
| UIJ66187.1 | aldo/keto_reductase [Bacillus cereus]                            | CPTF_metals_mix | 1373567.167 | 236434.4907 | 17.21317286 |
| UIJ66187.1 | aldo/keto_reductase [Bacillus cereus]                            | CPTF_zcontrol   | 536041.6667 | 79467.05124 | 14.82478997 |

|            |                                                                              |                 |             |             |             |
|------------|------------------------------------------------------------------------------|-----------------|-------------|-------------|-------------|
| UIJ66189.1 | peptide_ABC_transporter_substrate-binding_protein_[Bacillus_cereus]          | CPTF_Al         | 0           | 0           | 0           |
| UIJ66189.1 | peptide_ABC_transporter_substrate-binding_protein_[Bacillus_cereus]          | CPTF_Cd         | 22682.36667 | 39287.0115  | 173.2050808 |
| UIJ66189.1 | peptide_ABC_transporter_substrate-binding_protein_[Bacillus_cereus]          | CPTF_Co         | 11377.46667 | 19706.35033 | 173.2050808 |
| UIJ66189.1 | peptide_ABC_transporter_substrate-binding_protein_[Bacillus_cereus]          | CPTF_Cu         | 13010.86667 | 22535.48212 | 173.2050808 |
| UIJ66189.1 | peptide_ABC_transporter_substrate-binding_protein_[Bacillus_cereus]          | CPTF_Fe         | 0           | 0           | 0           |
| UIJ66189.1 | peptide_ABC_transporter_substrate-binding_protein_[Bacillus_cereus]          | CPTF_Mn         | 0           | 0           | 0           |
| UIJ66189.1 | peptide_ABC_transporter_substrate-binding_protein_[Bacillus_cereus]          | CPTF_Ni         | 0           | 0           | 0           |
| UIJ66189.1 | peptide_ABC_transporter_substrate-binding_protein_[Bacillus_cereus]          | CPTF_U          | 0           | 0           | 0           |
| UIJ66189.1 | peptide_ABC_transporter_substrate-binding_protein_[Bacillus_cereus]          | CPTF_metals_mix | 34170.63333 | 35318.90691 | 103.3640106 |
| UIJ66189.1 | peptide_ABC_transporter_substrate-binding_protein_[Bacillus_cereus]          | CPTF_zcontrol   | 0           | 0           | 0           |
| UIJ66194.1 | peptide_ABC_transporter_substrate-binding_protein_[Bacillus_cereus]          | CPTF_Al         | 211095      | 189265.1191 | 89.65874089 |
| UIJ66194.1 | peptide_ABC_transporter_substrate-binding_protein_[Bacillus_cereus]          | CPTF_Cd         | 0           | 0           | 0           |
| UIJ66194.1 | peptide_ABC_transporter_substrate-binding_protein_[Bacillus_cereus]          | CPTF_Co         | 274584.9    | 67167.332   | 24.46140775 |
| UIJ66194.1 | peptide_ABC_transporter_substrate-binding_protein_[Bacillus_cereus]          | CPTF_Cu         | 134599.3333 | 125978.8228 | 93.59542852 |
| UIJ66194.1 | peptide_ABC_transporter_substrate-binding_protein_[Bacillus_cereus]          | CPTF_Fe         | 0           | 0           | 0           |
| UIJ66194.1 | peptide_ABC_transporter_substrate-binding_protein_[Bacillus_cereus]          | CPTF_Mn         | 38465.33333 | 66623.91166 | 173.2050808 |
| UIJ66194.1 | peptide_ABC_transporter_substrate-binding_protein_[Bacillus_cereus]          | CPTF_Ni         | 0           | 0           | 0           |
| UIJ66194.1 | peptide_ABC_transporter_substrate-binding_protein_[Bacillus_cereus]          | CPTF_U          | 69976.7     | 121203.1997 | 173.2050808 |
| UIJ66194.1 | peptide_ABC_transporter_substrate-binding_protein_[Bacillus_cereus]          | CPTF_metals_mix | 0           | 0           | 0           |
| UIJ66194.1 | peptide_ABC_transporter_substrate-binding_protein_[Bacillus_cereus]          | CPTF_zcontrol   | 34642       | 60001.70408 | 173.2050808 |
| UIJ66202.1 | hypothetical_protein_LW858_25760_[Bacillus_cereus]                           | CPTF_Al         | 1549963.133 | 284699.1384 | 18.36812323 |
| UIJ66202.1 | hypothetical_protein_LW858_25760_[Bacillus_cereus]                           | CPTF_Cd         | 2370823.5   | 55199.71506 | 2.328292893 |
| UIJ66202.1 | hypothetical_protein_LW858_25760_[Bacillus_cereus]                           | CPTF_Co         | 1692280.4   | 398366.1636 | 23.5401984  |
| UIJ66202.1 | hypothetical_protein_LW858_25760_[Bacillus_cereus]                           | CPTF_Cu         | 1089505.367 | 48440.95949 | 4.446142348 |
| UIJ66202.1 | hypothetical_protein_LW858_25760_[Bacillus_cereus]                           | CPTF_Fe         | 1579934.833 | 180086.181  | 11.39832968 |
| UIJ66202.1 | hypothetical_protein_LW858_25760_[Bacillus_cereus]                           | CPTF_Mn         | 1867215.667 | 485757.0428 | 26.01504751 |
| UIJ66202.1 | hypothetical_protein_LW858_25760_[Bacillus_cereus]                           | CPTF_Ni         | 1407285.667 | 49587.60565 | 3.52363467  |
| UIJ66202.1 | hypothetical_protein_LW858_25760_[Bacillus_cereus]                           | CPTF_U          | 1173538.667 | 17016.08658 | 1.449980905 |
| UIJ66202.1 | hypothetical_protein_LW858_25760_[Bacillus_cereus]                           | CPTF_metals_mix | 1868325.467 | 226969.217  | 12.14826972 |
| UIJ66202.1 | hypothetical_protein_LW858_25760_[Bacillus_cereus]                           | CPTF_zcontrol   | 1226280.867 | 41790.69913 | 3.407922301 |
| UIJ66204.1 | MetQ/NlpA_family_ABC_transporter_substrate-binding_protein_[Bacillus_cereus] | CPTF_Al         | 355645.9333 | 51774.42089 | 14.55785545 |
| UIJ66204.1 | MetQ/NlpA_family_ABC_transporter_substrate-binding_protein_[Bacillus_cereus] | CPTF_Cd         | 348375.6667 | 36422.5556  | 10.45496545 |
| UIJ66204.1 | MetQ/NlpA_family_ABC_transporter_substrate-binding_protein_[Bacillus_cereus] | CPTF_Co         | 333104      | 79912.76199 | 23.99033395 |
| UIJ66204.1 | MetQ/NlpA_family_ABC_transporter_substrate-binding_protein_[Bacillus_cereus] | CPTF_Cu         | 247246      | 90417.88909 | 36.57001088 |
| UIJ66204.1 | MetQ/NlpA_family_ABC_transporter_substrate-binding_protein_[Bacillus_cereus] | CPTF_Fe         | 293152      | 26494.24792 | 9.037716926 |
| UIJ66204.1 | MetQ/NlpA_family_ABC_transporter_substrate-binding_protein_[Bacillus_cereus] | CPTF_Mn         | 271961      | 70963.54269 | 26.09327907 |
| UIJ66204.1 | MetQ/NlpA_family_ABC_transporter_substrate-binding_protein_[Bacillus_cereus] | CPTF_Ni         | 313730.6667 | 81338.33009 | 25.92616494 |
| UIJ66204.1 | MetQ/NlpA_family_ABC_transporter_substrate-binding_protein_[Bacillus_cereus] | CPTF_U          | 358172.3333 | 87595.6741  | 24.45629267 |
| UIJ66204.1 | MetQ/NlpA_family_ABC_transporter_substrate-binding_protein_[Bacillus_cereus] | CPTF_metals_mix | 50493.83333 | 45465.53208 | 90.04175179 |
| UIJ66204.1 | MetQ/NlpA_family_ABC_transporter_substrate-binding_protein_[Bacillus_cereus] | CPTF_zcontrol   | 314961      | 61022.72281 | 19.37469173 |
| UIJ66211.1 | DUF4256_domain-containing_protein_[Bacillus_cereus]                          | CPTF_Al         | 249163.1667 | 52886.32703 | 21.2255799  |
| UIJ66211.1 | DUF4256_domain-containing_protein_[Bacillus_cereus]                          | CPTF_Cd         | 363761.7333 | 176406.2079 | 48.4949877  |
| UIJ66211.1 | DUF4256_domain-containing_protein_[Bacillus_cereus]                          | CPTF_Co         | 327156.3333 | 86135.095   | 26.32842046 |
| UIJ66211.1 | DUF4256_domain-containing_protein_[Bacillus_cereus]                          | CPTF_Cu         | 236466.2333 | 92329.99719 | 39.04574276 |
| UIJ66211.1 | DUF4256_domain-containing_protein_[Bacillus_cereus]                          | CPTF_Fe         | 373947.1333 | 52772.09925 | 14.11218179 |
| UIJ66211.1 | DUF4256_domain-containing_protein_[Bacillus_cereus]                          | CPTF_Mn         | 448952.2667 | 190063.9516 | 42.33500211 |
| UIJ66211.1 | DUF4256_domain-containing_protein_[Bacillus_cereus]                          | CPTF_Ni         | 301221.1333 | 83121.45568 | 27.59482868 |
| UIJ66211.1 | DUF4256_domain-containing_protein_[Bacillus_cereus]                          | CPTF_U          | 287810.5667 | 199928.1204 | 69.4651773  |
| UIJ66211.1 | DUF4256_domain-containing_protein_[Bacillus_cereus]                          | CPTF_metals_mix | 189993.1    | 129127.52   | 67.96432082 |
| UIJ66211.1 | DUF4256_domain-containing_protein_[Bacillus_cereus]                          | CPTF_zcontrol   | 260293.3667 | 32772.81231 | 12.59072128 |
| UIJ66215.1 | glutamine--fructose-6-phosphate_transaminase_(isomerizing)_[Bacillus_cereus] | CPTF_Al         | 8564919.167 | 605420.7219 | 7.068609873 |
| UIJ66215.1 | glutamine--fructose-6-phosphate_transaminase_(isomerizing)_[Bacillus_cereus] | CPTF_Cd         | 9613039.4   | 84600.46409 | 0.880059475 |
| UIJ66215.1 | glutamine--fructose-6-phosphate_transaminase_(isomerizing)_[Bacillus_cereus] | CPTF_Co         | 9811335.067 | 709891.0864 | 7.235417827 |
| UIJ66215.1 | glutamine--fructose-6-phosphate_transaminase_(isomerizing)_[Bacillus_cereus] | CPTF_Cu         | 8424587.633 | 432829.9327 | 5.13769874  |
| UIJ66215.1 | glutamine--fructose-6-phosphate_transaminase_(isomerizing)_[Bacillus_cereus] | CPTF_Fe         | 8300465.6   | 1129618.151 | 13.60909381 |
| UIJ66215.1 | glutamine--fructose-6-phosphate_transaminase_(isomerizing)_[Bacillus_cereus] | CPTF_Mn         | 8595454.933 | 1733372.602 | 20.1661531  |
| UIJ66215.1 | glutamine--fructose-6-phosphate_transaminase_(isomerizing)_[Bacillus_cereus] | CPTF_Ni         | 6748338.667 | 1377386.813 | 20.41075412 |
| UIJ66215.1 | glutamine--fructose-6-phosphate_transaminase_(isomerizing)_[Bacillus_cereus] | CPTF_U          | 6962403     | 640530.1296 | 9.199842778 |
| UIJ66215.1 | glutamine--fructose-6-phosphate_transaminase_(isomerizing)_[Bacillus_cereus] | CPTF_metals_mix | 9280315.333 | 300255.5043 | 3.235401961 |
| UIJ66215.1 | glutamine--fructose-6-phosphate_transaminase_(isomerizing)_[Bacillus_cereus] | CPTF_zcontrol   | 8594483.2   | 690107.9101 | 8.029661518 |
| UIJ66217.1 | phosphoglucosamine_mutase_[Bacillus_cereus]                                  | CPTF_Al         | 5387832.567 | 193363.0225 | 3.588883287 |

|            |                                                        |                 |             |             |             |
|------------|--------------------------------------------------------|-----------------|-------------|-------------|-------------|
| UIJ66217.1 | phosphoglucosamine_mutase [Bacillus_cereus]            | CPTF_Cd         | 5512565.867 | 253484.5109 | 4.598303531 |
| UIJ66217.1 | phosphoglucosamine_mutase [Bacillus_cereus]            | CPTF_Co         | 5568207.533 | 256787.6696 | 4.611675626 |
| UIJ66217.1 | phosphoglucosamine_mutase [Bacillus_cereus]            | CPTF_Cu         | 5888148.633 | 261007.1751 | 4.432754528 |
| UIJ66217.1 | phosphoglucosamine_mutase [Bacillus_cereus]            | CPTF_Fe         | 5332108.333 | 387687.4532 | 7.270809762 |
| UIJ66217.1 | phosphoglucosamine_mutase [Bacillus_cereus]            | CPTF_Mn         | 5573031.433 | 470896.6363 | 8.449560027 |
| UIJ66217.1 | phosphoglucosamine_mutase [Bacillus_cereus]            | CPTF_Ni         | 4355806.667 | 1112653.321 | 25.54413927 |
| UIJ66217.1 | phosphoglucosamine_mutase [Bacillus_cereus]            | CPTF_U          | 4677105     | 1064698.024 | 22.76403937 |
| UIJ66217.1 | phosphoglucosamine_mutase [Bacillus_cereus]            | CPTF_metals_mix | 9615527.5   | 1114351.548 | 11.58908388 |
| UIJ66217.1 | phosphoglucosamine_mutase [Bacillus_cereus]            | CPTF_zcontrol   | 5372271.667 | 178909.6144 | 3.330241386 |
| UIJ66218.1 | YbbR-like_domain-containing_protein [Bacillus_cereus]  | CPTF_AI         | 50409.83333 | 49080.80843 | 97.36356022 |
| UIJ66218.1 | YbbR-like_domain-containing_protein [Bacillus_cereus]  | CPTF_Cd         | 184978.3333 | 20463.61807 | 11.0627108  |
| UIJ66218.1 | YbbR-like_domain-containing_protein [Bacillus_cereus]  | CPTF_Co         | 48980.56667 | 49347.04414 | 100.74821   |
| UIJ66218.1 | YbbR-like_domain-containing_protein [Bacillus_cereus]  | CPTF_Cu         | 54589       | 94550.92153 | 173.2050808 |
| UIJ66218.1 | YbbR-like_domain-containing_protein [Bacillus_cereus]  | CPTF_Fe         | 0           | 0           | 0           |
| UIJ66218.1 | YbbR-like_domain-containing_protein [Bacillus_cereus]  | CPTF_Mn         | 44158       | 76483.89956 | 173.2050808 |
| UIJ66218.1 | YbbR-like_domain-containing_protein [Bacillus_cereus]  | CPTF_Ni         | 0           | 0           | 0           |
| UIJ66218.1 | YbbR-like_domain-containing_protein [Bacillus_cereus]  | CPTF_U          | 0           | 0           | 0           |
| UIJ66218.1 | YbbR-like_domain-containing_protein [Bacillus_cereus]  | CPTF_metals_mix | 146888.3333 | 127215.5739 | 86.60699663 |
| UIJ66218.1 | YbbR-like_domain-containing_protein [Bacillus_cereus]  | CPTF_zcontrol   | 0           | 0           | 0           |
| UIJ66220.1 | arginase [Bacillus_cereus]                             | CPTF_AI         | 17466.33333 | 30252.57676 | 173.2050808 |
| UIJ66220.1 | arginase [Bacillus_cereus]                             | CPTF_Cd         | 30070.26667 | 26053.69205 | 86.64270369 |
| UIJ66220.1 | arginase [Bacillus_cereus]                             | CPTF_Co         | 52174.83333 | 25423.98901 | 48.72845276 |
| UIJ66220.1 | arginase [Bacillus_cereus]                             | CPTF_Cu         | 41040.9     | 11092.43965 | 27.02776901 |
| UIJ66220.1 | arginase [Bacillus_cereus]                             | CPTF_Fe         | 16610.7     | 28770.57635 | 173.2050808 |
| UIJ66220.1 | arginase [Bacillus_cereus]                             | CPTF_Mn         | 12683.33333 | 21968.17774 | 173.2050808 |
| UIJ66220.1 | arginase [Bacillus_cereus]                             | CPTF_Ni         | 11381.3     | 19712.98986 | 173.2050808 |
| UIJ66220.1 | arginase [Bacillus_cereus]                             | CPTF_U          | 17569.53333 | 30431.3244  | 173.2050808 |
| UIJ66220.1 | arginase [Bacillus_cereus]                             | CPTF_metals_mix | 0           | 0           | 0           |
| UIJ66220.1 | arginase [Bacillus_cereus]                             | CPTF_zcontrol   | 12167.9     | 21075.42102 | 173.2050808 |
| UIJ66226.1 | Mrp/NBP35_family_ATP-binding_protein [Bacillus_cereus] | CPTF_AI         | 458414.3667 | 232373.4063 | 50.69069016 |
| UIJ66226.1 | Mrp/NBP35_family_ATP-binding_protein [Bacillus_cereus] | CPTF_Cd         | 376241.4667 | 103403.923  | 27.48339355 |
| UIJ66226.1 | Mrp/NBP35_family_ATP-binding_protein [Bacillus_cereus] | CPTF_Co         | 403735.1333 | 115768.5621 | 28.67438391 |
| UIJ66226.1 | Mrp/NBP35_family_ATP-binding_protein [Bacillus_cereus] | CPTF_Cu         | 497104.9667 | 85192.20281 | 17.13766881 |
| UIJ66226.1 | Mrp/NBP35_family_ATP-binding_protein [Bacillus_cereus] | CPTF_Fe         | 344175.3    | 37161.06275 | 10.79713238 |
| UIJ66226.1 | Mrp/NBP35_family_ATP-binding_protein [Bacillus_cereus] | CPTF_Mn         | 407750.8    | 37107.2844  | 9.100481077 |
| UIJ66226.1 | Mrp/NBP35_family_ATP-binding_protein [Bacillus_cereus] | CPTF_Ni         | 412227.1    | 90589.64383 | 21.97566434 |
| UIJ66226.1 | Mrp/NBP35_family_ATP-binding_protein [Bacillus_cereus] | CPTF_U          | 266483.9667 | 93573.00744 | 35.11393522 |
| UIJ66226.1 | Mrp/NBP35_family_ATP-binding_protein [Bacillus_cereus] | CPTF_metals_mix | 810320.5667 | 190952.0225 | 23.56499765 |
| UIJ66226.1 | Mrp/NBP35_family_ATP-binding_protein [Bacillus_cereus] | CPTF_zcontrol   | 406094.8    | 192518.557  | 47.4072943  |
| UIJ66229.1 | 30S_ribosomal_protein_S9 [Bacillus_cereus]             | CPTF_AI         | 2835771     | 593108.6215 | 20.91525097 |
| UIJ66229.1 | 30S_ribosomal_protein_S9 [Bacillus_cereus]             | CPTF_Cd         | 2567413     | 386040.231  | 15.03615628 |
| UIJ66229.1 | 30S_ribosomal_protein_S9 [Bacillus_cereus]             | CPTF_Co         | 3032361.667 | 39719.71028 | 1.309860585 |
| UIJ66229.1 | 30S_ribosomal_protein_S9 [Bacillus_cereus]             | CPTF_Cu         | 2921758     | 242713.4854 | 8.307104334 |
| UIJ66229.1 | 30S_ribosomal_protein_S9 [Bacillus_cereus]             | CPTF_Fe         | 2764091     | 189639.8136 | 6.860838287 |
| UIJ66229.1 | 30S_ribosomal_protein_S9 [Bacillus_cereus]             | CPTF_Mn         | 2589310.333 | 288697.2632 | 11.1495814  |
| UIJ66229.1 | 30S_ribosomal_protein_S9 [Bacillus_cereus]             | CPTF_Ni         | 2622399     | 291634.3833 | 11.12090049 |
| UIJ66229.1 | 30S_ribosomal_protein_S9 [Bacillus_cereus]             | CPTF_U          | 2470840.333 | 432431.3732 | 17.50138879 |
| UIJ66229.1 | 30S_ribosomal_protein_S9 [Bacillus_cereus]             | CPTF_metals_mix | 2223920.667 | 415166.5794 | 18.66822795 |
| UIJ66229.1 | 30S_ribosomal_protein_S9 [Bacillus_cereus]             | CPTF_zcontrol   | 2236052.667 | 125050.2879 | 5.592457179 |
| UIJ66230.1 | 50S_ribosomal_protein_L13 [Bacillus_cereus]            | CPTF_AI         | 2787736.067 | 342476.5271 | 12.28511304 |
| UIJ66230.1 | 50S_ribosomal_protein_L13 [Bacillus_cereus]            | CPTF_Cd         | 2689342.433 | 472416.7823 | 17.56625621 |
| UIJ66230.1 | 50S_ribosomal_protein_L13 [Bacillus_cereus]            | CPTF_Co         | 3317380.367 | 90878.41724 | 2.739463287 |
| UIJ66230.1 | 50S_ribosomal_protein_L13 [Bacillus_cereus]            | CPTF_Cu         | 2953612.433 | 263762.6215 | 8.930170341 |
| UIJ66230.1 | 50S_ribosomal_protein_L13 [Bacillus_cereus]            | CPTF_Fe         | 2469849.633 | 238861.3175 | 9.671087435 |
| UIJ66230.1 | 50S_ribosomal_protein_L13 [Bacillus_cereus]            | CPTF_Mn         | 3017176.6   | 1147106.76  | 38.01921172 |
| UIJ66230.1 | 50S_ribosomal_protein_L13 [Bacillus_cereus]            | CPTF_Ni         | 1984560.767 | 510106.7854 | 25.70376246 |
| UIJ66230.1 | 50S_ribosomal_protein_L13 [Bacillus_cereus]            | CPTF_U          | 1745936.9   | 531411.1597 | 30.43701979 |
| UIJ66230.1 | 50S_ribosomal_protein_L13 [Bacillus_cereus]            | CPTF_metals_mix | 4226031.733 | 539302.3544 | 12.76143646 |
| UIJ66230.1 | 50S_ribosomal_protein_L13 [Bacillus_cereus]            | CPTF_zcontrol   | 2638433.9   | 46496.66124 | 1.762282589 |
| UIJ66235.1 | 50S_ribosomal_protein_L17 [Bacillus_cereus]            | CPTF_AI         | 4561072.333 | 45556.74902 | 0.998816631 |
| UIJ66235.1 | 50S_ribosomal_protein_L17 [Bacillus_cereus]            | CPTF_Cd         | 4773612     | 79307.29234 | 1.661368631 |

|            |                                                             |                 |             |             |             |
|------------|-------------------------------------------------------------|-----------------|-------------|-------------|-------------|
| UIJ66235.1 | 50S_ribosomal_protein_L17_[Bacillus_cereus]                 | CPTF_Co         | 5764407.333 | 507010.9369 | 8.795543195 |
| UIJ66235.1 | 50S_ribosomal_protein_L17_[Bacillus_cereus]                 | CPTF_Cu         | 4847043     | 393820.8924 | 8.12497212  |
| UIJ66235.1 | 50S_ribosomal_protein_L17_[Bacillus_cereus]                 | CPTF_Fe         | 4727655.667 | 697965.5023 | 14.76345892 |
| UIJ66235.1 | 50S_ribosomal_protein_L17_[Bacillus_cereus]                 | CPTF_Mn         | 4913449.667 | 986936.254  | 20.08642239 |
| UIJ66235.1 | 50S_ribosomal_protein_L17_[Bacillus_cereus]                 | CPTF_Ni         | 4521085.333 | 743132.872  | 16.43704591 |
| UIJ66235.1 | 50S_ribosomal_protein_L17_[Bacillus_cereus]                 | CPTF_U          | 3511506.333 | 515879.4926 | 14.69111668 |
| UIJ66235.1 | 50S_ribosomal_protein_L17_[Bacillus_cereus]                 | CPTF_metals_mix | 6286209.667 | 1141586.633 | 18.16017431 |
| UIJ66235.1 | 50S_ribosomal_protein_L17_[Bacillus_cereus]                 | CPTF_zcontrol   | 4571957.667 | 281013.9215 | 6.146468142 |
| UIJ66236.1 | DNA-directed_RNA_polymerase_subunit_alpha_[Bacillus_cereus] | CPTF_Al         | 13304448.53 | 354053.7397 | 2.661168096 |
| UIJ66236.1 | DNA-directed_RNA_polymerase_subunit_alpha_[Bacillus_cereus] | CPTF_Cd         | 13275255.93 | 640777.6453 | 4.826857188 |
| UIJ66236.1 | DNA-directed_RNA_polymerase_subunit_alpha_[Bacillus_cereus] | CPTF_Co         | 13249584    | 680712.6293 | 5.137615108 |
| UIJ66236.1 | DNA-directed_RNA_polymerase_subunit_alpha_[Bacillus_cereus] | CPTF_Cu         | 12653701.67 | 276623.6632 | 2.186108623 |
| UIJ66236.1 | DNA-directed_RNA_polymerase_subunit_alpha_[Bacillus_cereus] | CPTF_Fe         | 14154679.67 | 705896.3899 | 4.987017767 |
| UIJ66236.1 | DNA-directed_RNA_polymerase_subunit_alpha_[Bacillus_cereus] | CPTF_Mn         | 13475512    | 683304.7424 | 5.070714511 |
| UIJ66236.1 | DNA-directed_RNA_polymerase_subunit_alpha_[Bacillus_cereus] | CPTF_Ni         | 12642827.33 | 834838.0528 | 6.603254405 |
| UIJ66236.1 | DNA-directed_RNA_polymerase_subunit_alpha_[Bacillus_cereus] | CPTF_U          | 13812123.27 | 2739755.252 | 19.83587316 |
| UIJ66236.1 | DNA-directed_RNA_polymerase_subunit_alpha_[Bacillus_cereus] | CPTF_metals_mix | 12812197.8  | 1735148.298 | 13.54294029 |
| UIJ66236.1 | DNA-directed_RNA_polymerase_subunit_alpha_[Bacillus_cereus] | CPTF_zcontrol   | 13484605.5  | 525116.2796 | 3.894190895 |
| UIJ66237.1 | 30S_ribosomal_protein_S11_[Bacillus_cereus]                 | CPTF_Al         | 6692464     | 1601214.543 | 23.92563551 |
| UIJ66237.1 | 30S_ribosomal_protein_S11_[Bacillus_cereus]                 | CPTF_Cd         | 8576150.667 | 540752.4661 | 6.305305109 |
| UIJ66237.1 | 30S_ribosomal_protein_S11_[Bacillus_cereus]                 | CPTF_Co         | 6906635     | 803021.0723 | 11.62680629 |
| UIJ66237.1 | 30S_ribosomal_protein_S11_[Bacillus_cereus]                 | CPTF_Cu         | 5976553.4   | 825595.6091 | 13.81390835 |
| UIJ66237.1 | 30S_ribosomal_protein_S11_[Bacillus_cereus]                 | CPTF_Fe         | 6734018.933 | 1491126.048 | 22.1431817  |
| UIJ66237.1 | 30S_ribosomal_protein_S11_[Bacillus_cereus]                 | CPTF_Mn         | 6874818.067 | 3535022.408 | 51.41986848 |
| UIJ66237.1 | 30S_ribosomal_protein_S11_[Bacillus_cereus]                 | CPTF_Ni         | 2785660.333 | 1083111.452 | 38.88167696 |
| UIJ66237.1 | 30S_ribosomal_protein_S11_[Bacillus_cereus]                 | CPTF_U          | 3807383.633 | 817668.7947 | 21.47587093 |
| UIJ66237.1 | 30S_ribosomal_protein_S11_[Bacillus_cereus]                 | CPTF_metals_mix | 10327837.17 | 244161.028  | 2.364106095 |
| UIJ66237.1 | 30S_ribosomal_protein_S11_[Bacillus_cereus]                 | CPTF_zcontrol   | 5428091.333 | 1579351.695 | 29.0958939  |
| UIJ66238.1 | 30S_ribosomal_protein_S13_[Bacillus_cereus]                 | CPTF_Al         | 9531722.667 | 182556.7932 | 1.915254981 |
| UIJ66238.1 | 30S_ribosomal_protein_S13_[Bacillus_cereus]                 | CPTF_Cd         | 9677118.667 | 457869.2122 | 4.731462204 |
| UIJ66238.1 | 30S_ribosomal_protein_S13_[Bacillus_cereus]                 | CPTF_Co         | 9848150     | 646044.5297 | 6.560059805 |
| UIJ66238.1 | 30S_ribosomal_protein_S13_[Bacillus_cereus]                 | CPTF_Cu         | 8784652     | 532797.2872 | 6.0650927   |
| UIJ66238.1 | 30S_ribosomal_protein_S13_[Bacillus_cereus]                 | CPTF_Fe         | 9828283     | 840329.5807 | 8.550115831 |
| UIJ66238.1 | 30S_ribosomal_protein_S13_[Bacillus_cereus]                 | CPTF_Mn         | 9706666.667 | 185022.5212 | 1.906138611 |
| UIJ66238.1 | 30S_ribosomal_protein_S13_[Bacillus_cereus]                 | CPTF_Ni         | 9228196     | 110324.627  | 1.195516729 |
| UIJ66238.1 | 30S_ribosomal_protein_S13_[Bacillus_cereus]                 | CPTF_U          | 10044903.9  | 900747.3167 | 8.96720691  |
| UIJ66238.1 | 30S_ribosomal_protein_S13_[Bacillus_cereus]                 | CPTF_metals_mix | 11873333.33 | 3480766.199 | 29.31582986 |
| UIJ66238.1 | 30S_ribosomal_protein_S13_[Bacillus_cereus]                 | CPTF_zcontrol   | 10203333.33 | 443771.7131 | 4.349281736 |
| UIJ66239.1 | 50S_ribosomal_protein_L36_[Bacillus_cereus]                 | CPTF_Al         | 0           | 0           | 0           |
| UIJ66239.1 | 50S_ribosomal_protein_L36_[Bacillus_cereus]                 | CPTF_Cd         | 0           | 0           | 0           |
| UIJ66239.1 | 50S_ribosomal_protein_L36_[Bacillus_cereus]                 | CPTF_Co         | 0           | 0           | 0           |
| UIJ66239.1 | 50S_ribosomal_protein_L36_[Bacillus_cereus]                 | CPTF_Cu         | 0           | 0           | 0           |
| UIJ66239.1 | 50S_ribosomal_protein_L36_[Bacillus_cereus]                 | CPTF_Fe         | 0           | 0           | 0           |
| UIJ66239.1 | 50S_ribosomal_protein_L36_[Bacillus_cereus]                 | CPTF_Mn         | 0           | 0           | 0           |
| UIJ66239.1 | 50S_ribosomal_protein_L36_[Bacillus_cereus]                 | CPTF_Ni         | 0           | 0           | 0           |
| UIJ66239.1 | 50S_ribosomal_protein_L36_[Bacillus_cereus]                 | CPTF_U          | 0           | 0           | 0           |
| UIJ66239.1 | 50S_ribosomal_protein_L36_[Bacillus_cereus]                 | CPTF_metals_mix | 475906.6667 | 195461.5508 | 41.07140422 |
| UIJ66239.1 | 50S_ribosomal_protein_L36_[Bacillus_cereus]                 | CPTF_zcontrol   | 0           | 0           | 0           |
| UIJ66240.1 | translation_initiation_factor_IF-1_[Bacillus_cereus]        | CPTF_Al         | 0           | 0           | 0           |
| UIJ66240.1 | translation_initiation_factor_IF-1_[Bacillus_cereus]        | CPTF_Cd         | 15678.56667 | 27156.07406 | 173.2050808 |
| UIJ66240.1 | translation_initiation_factor_IF-1_[Bacillus_cereus]        | CPTF_Co         | 0           | 0           | 0           |
| UIJ66240.1 | translation_initiation_factor_IF-1_[Bacillus_cereus]        | CPTF_Cu         | 0           | 0           | 0           |
| UIJ66240.1 | translation_initiation_factor_IF-1_[Bacillus_cereus]        | CPTF_Fe         | 0           | 0           | 0           |
| UIJ66240.1 | translation_initiation_factor_IF-1_[Bacillus_cereus]        | CPTF_Mn         | 144962.3333 | 251082.1265 | 173.2050808 |
| UIJ66240.1 | translation_initiation_factor_IF-1_[Bacillus_cereus]        | CPTF_Ni         | 0           | 0           | 0           |
| UIJ66240.1 | translation_initiation_factor_IF-1_[Bacillus_cereus]        | CPTF_U          | 0           | 0           | 0           |
| UIJ66240.1 | translation_initiation_factor_IF-1_[Bacillus_cereus]        | CPTF_metals_mix | 1066726     | 119464.8277 | 11.19920464 |
| UIJ66240.1 | translation_initiation_factor_IF-1_[Bacillus_cereus]        | CPTF_zcontrol   | 0           | 0           | 0           |
| UIJ66241.1 | type_I_methionyl_aminopeptidase_[Bacillus_cereus]           | CPTF_Al         | 203485.3333 | 37955.00244 | 18.65245117 |
| UIJ66241.1 | type_I_methionyl_aminopeptidase_[Bacillus_cereus]           | CPTF_Cd         | 174256.3333 | 16710.47987 | 9.589596858 |
| UIJ66241.1 | type_I_methionyl_aminopeptidase_[Bacillus_cereus]           | CPTF_Co         | 214060.3333 | 10651.22877 | 4.97580687  |

|            |                                                       |                 |             |             |             |
|------------|-------------------------------------------------------|-----------------|-------------|-------------|-------------|
| UIJ66241.1 | type_I_methionyl_aminopeptidase [Bacillus cereus]     | CPTF_Cu         | 164776.6667 | 15976.45972 | 9.695826507 |
| UIJ66241.1 | type_I_methionyl_aminopeptidase [Bacillus cereus]     | CPTF_Fe         | 161145.8    | 54855.81309 | 34.04110631 |
| UIJ66241.1 | type_I_methionyl_aminopeptidase [Bacillus cereus]     | CPTF_Mn         | 164639      | 34487.23921 | 20.947187   |
| UIJ66241.1 | type_I_methionyl_aminopeptidase [Bacillus cereus]     | CPTF_Ni         | 147720.3333 | 128748.3987 | 87.15685633 |
| UIJ66241.1 | type_I_methionyl_aminopeptidase [Bacillus cereus]     | CPTF_U          | 198545.3333 | 54690.5379  | 27.54561741 |
| UIJ66241.1 | type_I_methionyl_aminopeptidase [Bacillus cereus]     | CPTF_metals_mix | 103206.8333 | 128157.1342 | 124.1750474 |
| UIJ66241.1 | type_I_methionyl_aminopeptidase [Bacillus cereus]     | CPTF_zcontrol   | 136310      | 25546.5794  | 18.74152989 |
| UIJ66242.1 | adenylate_kinase [Bacillus cereus]                    | CPTF_Al         | 10279422.73 | 379854.3837 | 3.69528906  |
| UIJ66242.1 | adenylate_kinase [Bacillus cereus]                    | CPTF_Cd         | 10526495.53 | 1012024.375 | 9.614067394 |
| UIJ66242.1 | adenylate_kinase [Bacillus cereus]                    | CPTF_Co         | 10463566.73 | 435365.0091 | 4.160770607 |
| UIJ66242.1 | adenylate_kinase [Bacillus cereus]                    | CPTF_Cu         | 9809265.433 | 635625.2649 | 6.479845706 |
| UIJ66242.1 | adenylate_kinase [Bacillus cereus]                    | CPTF_Fe         | 9950419.8   | 814864.748  | 8.189249945 |
| UIJ66242.1 | adenylate_kinase [Bacillus cereus]                    | CPTF_Mn         | 9600452.233 | 317812.036  | 3.310386097 |
| UIJ66242.1 | adenylate_kinase [Bacillus cereus]                    | CPTF_Ni         | 9816539.467 | 191015.1874 | 1.945850552 |
| UIJ66242.1 | adenylate_kinase [Bacillus cereus]                    | CPTF_U          | 8473423.233 | 513589.9364 | 6.061185926 |
| UIJ66242.1 | adenylate_kinase [Bacillus cereus]                    | CPTF_metals_mix | 6911070.967 | 275866.5875 | 3.991661912 |
| UIJ66242.1 | adenylate_kinase [Bacillus cereus]                    | CPTF_zcontrol   | 10146791.2  | 660578.9116 | 6.510224746 |
| UIJ66243.1 | preprotein_translocase_subunit_SecY [Bacillus cereus] | CPTF_Al         | 320771      | 36512.59247 | 11.38275981 |
| UIJ66243.1 | preprotein_translocase_subunit_SecY [Bacillus cereus] | CPTF_Cd         | 314689      | 25765.39454 | 8.187573936 |
| UIJ66243.1 | preprotein_translocase_subunit_SecY [Bacillus cereus] | CPTF_Co         | 377810      | 34494.24069 | 9.130049679 |
| UIJ66243.1 | preprotein_translocase_subunit_SecY [Bacillus cereus] | CPTF_Cu         | 342254.6667 | 5020.500008 | 1.466890154 |
| UIJ66243.1 | preprotein_translocase_subunit_SecY [Bacillus cereus] | CPTF_Fe         | 297310.6667 | 59207.80345 | 19.91445652 |
| UIJ66243.1 | preprotein_translocase_subunit_SecY [Bacillus cereus] | CPTF_Mn         | 297348      | 114702.3156 | 38.57510917 |
| UIJ66243.1 | preprotein_translocase_subunit_SecY [Bacillus cereus] | CPTF_Ni         | 324535.6667 | 18360.58992 | 5.657495249 |
| UIJ66243.1 | preprotein_translocase_subunit_SecY [Bacillus cereus] | CPTF_U          | 307179.3333 | 101191.7835 | 32.94224987 |
| UIJ66243.1 | preprotein_translocase_subunit_SecY [Bacillus cereus] | CPTF_metals_mix | 208974      | 30123.29247 | 14.41485183 |
| UIJ66243.1 | preprotein_translocase_subunit_SecY [Bacillus cereus] | CPTF_zcontrol   | 314443.6667 | 57772.96643 | 18.37307364 |
| UIJ66244.1 | 50S_ribosomal_protein_L15 [Bacillus cereus]           | CPTF_Al         | 3390916.667 | 750681.7804 | 22.13801913 |
| UIJ66244.1 | 50S_ribosomal_protein_L15 [Bacillus cereus]           | CPTF_Cd         | 3541680.733 | 728820.0573 | 20.57836694 |
| UIJ66244.1 | 50S_ribosomal_protein_L15 [Bacillus cereus]           | CPTF_Co         | 3755081.733 | 1217479.944 | 32.42219559 |
| UIJ66244.1 | 50S_ribosomal_protein_L15 [Bacillus cereus]           | CPTF_Cu         | 3414940.767 | 926383.6718 | 27.12737161 |
| UIJ66244.1 | 50S_ribosomal_protein_L15 [Bacillus cereus]           | CPTF_Fe         | 3379032.567 | 1426797.383 | 42.2250261  |
| UIJ66244.1 | 50S_ribosomal_protein_L15 [Bacillus cereus]           | CPTF_Mn         | 4069192.033 | 1188773.35  | 29.21398992 |
| UIJ66244.1 | 50S_ribosomal_protein_L15 [Bacillus cereus]           | CPTF_Ni         | 4158300.133 | 428002.0298 | 10.29271616 |
| UIJ66244.1 | 50S_ribosomal_protein_L15 [Bacillus cereus]           | CPTF_U          | 2236121.533 | 592727.615  | 26.50694992 |
| UIJ66244.1 | 50S_ribosomal_protein_L15 [Bacillus cereus]           | CPTF_metals_mix | 6062556.8   | 1451639.695 | 23.94434795 |
| UIJ66244.1 | 50S_ribosomal_protein_L15 [Bacillus cereus]           | CPTF_zcontrol   | 4580799.9   | 659550.6925 | 14.39815549 |
| UIJ66245.1 | 50S_ribosomal_protein_L30 [Bacillus cereus]           | CPTF_Al         | 5496815.933 | 1111315.794 | 20.21744602 |
| UIJ66245.1 | 50S_ribosomal_protein_L30 [Bacillus cereus]           | CPTF_Cd         | 5739646.667 | 1207019.626 | 21.02951099 |
| UIJ66245.1 | 50S_ribosomal_protein_L30 [Bacillus cereus]           | CPTF_Co         | 6174028.667 | 720085.066  | 11.66313124 |
| UIJ66245.1 | 50S_ribosomal_protein_L30 [Bacillus cereus]           | CPTF_Cu         | 6681296     | 1342388.781 | 20.0917424  |
| UIJ66245.1 | 50S_ribosomal_protein_L30 [Bacillus cereus]           | CPTF_Fe         | 6112350.667 | 957442.2632 | 15.66405979 |
| UIJ66245.1 | 50S_ribosomal_protein_L30 [Bacillus cereus]           | CPTF_Mn         | 5403276.8   | 568718.3008 | 10.5254334  |
| UIJ66245.1 | 50S_ribosomal_protein_L30 [Bacillus cereus]           | CPTF_Ni         | 5148165     | 774422.0618 | 15.04268146 |
| UIJ66245.1 | 50S_ribosomal_protein_L30 [Bacillus cereus]           | CPTF_U          | 3795591.033 | 307660.8918 | 8.105743982 |
| UIJ66245.1 | 50S_ribosomal_protein_L30 [Bacillus cereus]           | CPTF_metals_mix | 6710102.067 | 848786.0647 | 12.64937636 |
| UIJ66245.1 | 50S_ribosomal_protein_L30 [Bacillus cereus]           | CPTF_zcontrol   | 5266910.8   | 560071.1552 | 10.63376952 |
| UIJ66246.1 | 30S_ribosomal_protein_S5 [Bacillus cereus]            | CPTF_Al         | 15046751.6  | 2449586.271 | 16.27983459 |
| UIJ66246.1 | 30S_ribosomal_protein_S5 [Bacillus cereus]            | CPTF_Cd         | 19231315    | 959475.7604 | 4.989132362 |
| UIJ66246.1 | 30S_ribosomal_protein_S5 [Bacillus cereus]            | CPTF_Co         | 15154555.83 | 1027471.064 | 6.779948389 |
| UIJ66246.1 | 30S_ribosomal_protein_S5 [Bacillus cereus]            | CPTF_Cu         | 13125188.17 | 1060896.347 | 8.082903907 |
| UIJ66246.1 | 30S_ribosomal_protein_S5 [Bacillus cereus]            | CPTF_Fe         | 17177427.33 | 2770136.849 | 16.12661079 |
| UIJ66246.1 | 30S_ribosomal_protein_S5 [Bacillus cereus]            | CPTF_Mn         | 16295900    | 5276363.13  | 32.37847023 |
| UIJ66246.1 | 30S_ribosomal_protein_S5 [Bacillus cereus]            | CPTF_Ni         | 9926829.333 | 456239.6359 | 4.596025786 |
| UIJ66246.1 | 30S_ribosomal_protein_S5 [Bacillus cereus]            | CPTF_U          | 11506624.93 | 2358922.254 | 20.50055744 |
| UIJ66246.1 | 30S_ribosomal_protein_S5 [Bacillus cereus]            | CPTF_metals_mix | 16415123.7  | 710030.7707 | 4.325467073 |
| UIJ66246.1 | 30S_ribosomal_protein_S5 [Bacillus cereus]            | CPTF_zcontrol   | 13765938.03 | 3228679.299 | 23.45411763 |
| UIJ66247.1 | 50S_ribosomal_protein_L6 [Bacillus cereus]            | CPTF_Al         | 17634262.73 | 1271691.575 | 7.211481388 |
| UIJ66247.1 | 50S_ribosomal_protein_L6 [Bacillus cereus]            | CPTF_Cd         | 19123026    | 483615.8968 | 2.528971601 |
| UIJ66247.1 | 50S_ribosomal_protein_L6 [Bacillus cereus]            | CPTF_Co         | 18035209.63 | 1369907.719 | 7.595740482 |
| UIJ66247.1 | 50S_ribosomal_protein_L6 [Bacillus cereus]            | CPTF_Cu         | 15553088.03 | 678111.8648 | 4.359982168 |

|            |                                             |                 |             |             |             |
|------------|---------------------------------------------|-----------------|-------------|-------------|-------------|
| UIJ66247.1 | 50S_ribosomal_protein_L6_[Bacillus_cereus]  | CPTF_Fe         | 18241243.73 | 2254587.105 | 12.35983214 |
| UIJ66247.1 | 50S_ribosomal_protein_L6_[Bacillus_cereus]  | CPTF_Mn         | 18769886.67 | 2238665.592 | 11.92689989 |
| UIJ66247.1 | 50S_ribosomal_protein_L6_[Bacillus_cereus]  | CPTF_Ni         | 15753513.67 | 489285.3342 | 3.10588066  |
| UIJ66247.1 | 50S_ribosomal_protein_L6_[Bacillus_cereus]  | CPTF_U          | 17793567.9  | 1572532.049 | 8.837643232 |
| UIJ66247.1 | 50S_ribosomal_protein_L6_[Bacillus_cereus]  | CPTF_metals_mix | 19297001.4  | 2022141.439 | 10.47904489 |
| UIJ66247.1 | 50S_ribosomal_protein_L6_[Bacillus_cereus]  | CPTF_zcontrol   | 18096588.47 | 1508750.028 | 8.337206933 |
| UIJ66248.1 | 30S_ribosomal_protein_S8_[Bacillus_cereus]  | CPTF_AI         | 6030659.6   | 262159.6131 | 4.347113426 |
| UIJ66248.1 | 30S_ribosomal_protein_S8_[Bacillus_cereus]  | CPTF_Cd         | 6125695.6   | 547725.8347 | 8.941447151 |
| UIJ66248.1 | 30S_ribosomal_protein_S8_[Bacillus_cereus]  | CPTF_Co         | 5889397.667 | 255903.2694 | 4.345151811 |
| UIJ66248.1 | 30S_ribosomal_protein_S8_[Bacillus_cereus]  | CPTF_Cu         | 5518453.667 | 304647.3413 | 5.520520053 |
| UIJ66248.1 | 30S_ribosomal_protein_S8_[Bacillus_cereus]  | CPTF_Fe         | 6046504.033 | 511275.9457 | 8.455728184 |
| UIJ66248.1 | 30S_ribosomal_protein_S8_[Bacillus_cereus]  | CPTF_Mn         | 6473884.333 | 566360.1475 | 8.748382244 |
| UIJ66248.1 | 30S_ribosomal_protein_S8_[Bacillus_cereus]  | CPTF_Ni         | 5095202.333 | 1709936.866 | 33.55974414 |
| UIJ66248.1 | 30S_ribosomal_protein_S8_[Bacillus_cereus]  | CPTF_U          | 7240074     | 3164550.002 | 43.70880743 |
| UIJ66248.1 | 30S_ribosomal_protein_S8_[Bacillus_cereus]  | CPTF_metals_mix | 4888903.667 | 995680.7132 | 20.36613485 |
| UIJ66248.1 | 30S_ribosomal_protein_S8_[Bacillus_cereus]  | CPTF_zcontrol   | 5903928     | 255764.1424 | 4.332101313 |
| UIJ66250.1 | 50S_ribosomal_protein_L5_[Bacillus_cereus]  | CPTF_AI         | 13815212.9  | 2014527.035 | 14.58194709 |
| UIJ66250.1 | 50S_ribosomal_protein_L5_[Bacillus_cereus]  | CPTF_Cd         | 13661305    | 2550226.056 | 18.66751424 |
| UIJ66250.1 | 50S_ribosomal_protein_L5_[Bacillus_cereus]  | CPTF_Co         | 15567902.93 | 1217616.32  | 7.821325233 |
| UIJ66250.1 | 50S_ribosomal_protein_L5_[Bacillus_cereus]  | CPTF_Cu         | 14630404.43 | 653815.2936 | 4.468880519 |
| UIJ66250.1 | 50S_ribosomal_protein_L5_[Bacillus_cereus]  | CPTF_Fe         | 12592713.67 | 1895645.574 | 15.05351129 |
| UIJ66250.1 | 50S_ribosomal_protein_L5_[Bacillus_cereus]  | CPTF_Mn         | 16958721.67 | 4577474.996 | 26.99186346 |
| UIJ66250.1 | 50S_ribosomal_protein_L5_[Bacillus_cereus]  | CPTF_Ni         | 13105495.33 | 1649132.611 | 12.58351989 |
| UIJ66250.1 | 50S_ribosomal_protein_L5_[Bacillus_cereus]  | CPTF_U          | 10913258.03 | 414068.1244 | 3.794175151 |
| UIJ66250.1 | 50S_ribosomal_protein_L5_[Bacillus_cereus]  | CPTF_metals_mix | 18318739    | 2177862.513 | 11.88871414 |
| UIJ66250.1 | 50S_ribosomal_protein_L5_[Bacillus_cereus]  | CPTF_zcontrol   | 15203159.57 | 918772.6336 | 6.043300602 |
| UIJ66251.1 | 50S_ribosomal_protein_L24_[Bacillus_cereus] | CPTF_AI         | 6779422.767 | 368753.2026 | 5.439300886 |
| UIJ66251.1 | 50S_ribosomal_protein_L24_[Bacillus_cereus] | CPTF_Cd         | 7437298.6   | 415539.0352 | 5.587230762 |
| UIJ66251.1 | 50S_ribosomal_protein_L24_[Bacillus_cereus] | CPTF_Co         | 7151616.1   | 240191.2528 | 3.358559093 |
| UIJ66251.1 | 50S_ribosomal_protein_L24_[Bacillus_cereus] | CPTF_Cu         | 6212922.633 | 349616.1707 | 5.62724166  |
| UIJ66251.1 | 50S_ribosomal_protein_L24_[Bacillus_cereus] | CPTF_Fe         | 6961923.167 | 778039.5118 | 11.1756406  |
| UIJ66251.1 | 50S_ribosomal_protein_L24_[Bacillus_cereus] | CPTF_Mn         | 7287161.533 | 1656157.692 | 22.72706161 |
| UIJ66251.1 | 50S_ribosomal_protein_L24_[Bacillus_cereus] | CPTF_Ni         | 6210039.4   | 137029.0422 | 2.206572831 |
| UIJ66251.1 | 50S_ribosomal_protein_L24_[Bacillus_cereus] | CPTF_U          | 5358048.167 | 405917.6779 | 7.575849737 |
| UIJ66251.1 | 50S_ribosomal_protein_L24_[Bacillus_cereus] | CPTF_metals_mix | 6785998.933 | 345392.4801 | 5.089780937 |
| UIJ66251.1 | 50S_ribosomal_protein_L24_[Bacillus_cereus] | CPTF_zcontrol   | 6513824.133 | 299541.4771 | 4.598550268 |
| UIJ66252.1 | 50S_ribosomal_protein_L14_[Bacillus_cereus] | CPTF_AI         | 11175977.33 | 164929.3421 | 1.475748717 |
| UIJ66252.1 | 50S_ribosomal_protein_L14_[Bacillus_cereus] | CPTF_Cd         | 10883763.33 | 212982.4488 | 1.956882397 |
| UIJ66252.1 | 50S_ribosomal_protein_L14_[Bacillus_cereus] | CPTF_Co         | 10863659.67 | 433507.8597 | 3.990440358 |
| UIJ66252.1 | 50S_ribosomal_protein_L14_[Bacillus_cereus] | CPTF_Cu         | 10012580.3  | 580929.7925 | 5.801998837 |
| UIJ66252.1 | 50S_ribosomal_protein_L14_[Bacillus_cereus] | CPTF_Fe         | 11083826    | 891011.4881 | 8.03884406  |
| UIJ66252.1 | 50S_ribosomal_protein_L14_[Bacillus_cereus] | CPTF_Mn         | 10851097    | 526847.8626 | 4.855249775 |
| UIJ66252.1 | 50S_ribosomal_protein_L14_[Bacillus_cereus] | CPTF_Ni         | 10642708.67 | 144777.682  | 1.360346191 |
| UIJ66252.1 | 50S_ribosomal_protein_L14_[Bacillus_cereus] | CPTF_U          | 10978115.33 | 634888.7154 | 5.783221401 |
| UIJ66252.1 | 50S_ribosomal_protein_L14_[Bacillus_cereus] | CPTF_metals_mix | 7610134.667 | 384032.3377 | 5.046327752 |
| UIJ66252.1 | 50S_ribosomal_protein_L14_[Bacillus_cereus] | CPTF_zcontrol   | 11061120    | 372308.3304 | 3.365918916 |
| UIJ66253.1 | 30S_ribosomal_protein_S17_[Bacillus_cereus] | CPTF_AI         | 1613187     | 99784.18476 | 6.185531173 |
| UIJ66253.1 | 30S_ribosomal_protein_S17_[Bacillus_cereus] | CPTF_Cd         | 1625334.333 | 177694.0384 | 10.9327684  |
| UIJ66253.1 | 30S_ribosomal_protein_S17_[Bacillus_cereus] | CPTF_Co         | 1739736.667 | 83976.935   | 4.826991154 |
| UIJ66253.1 | 30S_ribosomal_protein_S17_[Bacillus_cereus] | CPTF_Cu         | 1568460.667 | 237250.8938 | 15.12635279 |
| UIJ66253.1 | 30S_ribosomal_protein_S17_[Bacillus_cereus] | CPTF_Fe         | 1413766.333 | 149365.6436 | 10.56508704 |
| UIJ66253.1 | 30S_ribosomal_protein_S17_[Bacillus_cereus] | CPTF_Mn         | 1484671     | 777833.2353 | 52.3909496  |
| UIJ66253.1 | 30S_ribosomal_protein_S17_[Bacillus_cereus] | CPTF_Ni         | 659194      | 542404.0325 | 82.28291405 |
| UIJ66253.1 | 30S_ribosomal_protein_S17_[Bacillus_cereus] | CPTF_U          | 977008.6667 | 532725.0468 | 54.52613318 |
| UIJ66253.1 | 30S_ribosomal_protein_S17_[Bacillus_cereus] | CPTF_metals_mix | 1755642.667 | 47311.965   | 2.694851629 |
| UIJ66253.1 | 30S_ribosomal_protein_S17_[Bacillus_cereus] | CPTF_zcontrol   | 1540419     | 47608.51637 | 3.090621212 |
| UIJ66254.1 | 50S_ribosomal_protein_L29_[Bacillus_cereus] | CPTF_AI         | 11826529.37 | 1971659.806 | 16.67149968 |
| UIJ66254.1 | 50S_ribosomal_protein_L29_[Bacillus_cereus] | CPTF_Cd         | 14340509.73 | 1172021.53  | 8.172802443 |
| UIJ66254.1 | 50S_ribosomal_protein_L29_[Bacillus_cereus] | CPTF_Co         | 12274042.07 | 1512356.094 | 12.32158148 |
| UIJ66254.1 | 50S_ribosomal_protein_L29_[Bacillus_cereus] | CPTF_Cu         | 10336677.47 | 734480.5169 | 7.105576422 |
| UIJ66254.1 | 50S_ribosomal_protein_L29_[Bacillus_cereus] | CPTF_Fe         | 12999959.47 | 3218243.163 | 24.75579383 |



|            |                                             |                 |             |             |             |
|------------|---------------------------------------------|-----------------|-------------|-------------|-------------|
| UIJ66254.1 | 50S_ribosomal_protein_L29_[Bacillus_cereus] | CPTF_Mn         | 12699530.27 | 3984955.653 | 31.37876417 |
| UIJ66254.1 | 50S_ribosomal_protein_L29_[Bacillus_cereus] | CPTF_Ni         | 4596720.233 | 1237235.343 | 26.91561115 |
| UIJ66254.1 | 50S_ribosomal_protein_L29_[Bacillus_cereus] | CPTF_U          | 7110628.667 | 911352.6737 | 12.81676651 |
| UIJ66254.1 | 50S_ribosomal_protein_L29_[Bacillus_cereus] | CPTF_metals_mix | 11350002.33 | 363045.9234 | 3.198641839 |
| UIJ66254.1 | 50S_ribosomal_protein_L29_[Bacillus_cereus] | CPTF_zcontrol   | 10792400.1  | 2638238.479 | 24.44533612 |
| UIJ66255.1 | 50S_ribosomal_protein_L16_[Bacillus_cereus] | CPTF_Al         | 3189264.667 | 296145.3906 | 9.285695027 |
| UIJ66255.1 | 50S_ribosomal_protein_L16_[Bacillus_cereus] | CPTF_Cd         | 3033333.333 | 187705.443  | 6.188091528 |
| UIJ66255.1 | 50S_ribosomal_protein_L16_[Bacillus_cereus] | CPTF_Co         | 3776896.333 | 566246.7733 | 14.99238325 |
| UIJ66255.1 | 50S_ribosomal_protein_L16_[Bacillus_cereus] | CPTF_Cu         | 3830434.2   | 299079.0381 | 7.807966996 |
| UIJ66255.1 | 50S_ribosomal_protein_L16_[Bacillus_cereus] | CPTF_Fe         | 3270000     | 259422.4354 | 7.933407811 |
| UIJ66255.1 | 50S_ribosomal_protein_L16_[Bacillus_cereus] | CPTF_Mn         | 3232524     | 437356.6044 | 13.52987957 |
| UIJ66255.1 | 50S_ribosomal_protein_L16_[Bacillus_cereus] | CPTF_Ni         | 3226666.667 | 134288.2472 | 4.161825843 |
| UIJ66255.1 | 50S_ribosomal_protein_L16_[Bacillus_cereus] | CPTF_U          | 2604816     | 405192.5747 | 15.55551619 |
| UIJ66255.1 | 50S_ribosomal_protein_L16_[Bacillus_cereus] | CPTF_metals_mix | 3931239.333 | 1080744.231 | 27.4911838  |
| UIJ66255.1 | 50S_ribosomal_protein_L16_[Bacillus_cereus] | CPTF_zcontrol   | 3065021.367 | 111717.3683 | 3.644913196 |
| UIJ66256.1 | 30S_ribosomal_protein_S3_[Bacillus_cereus]  | CPTF_Al         | 22538773.43 | 1194505.59  | 5.299780814 |
| UIJ66256.1 | 30S_ribosomal_protein_S3_[Bacillus_cereus]  | CPTF_Cd         | 24172529.67 | 640106.1975 | 2.648072859 |
| UIJ66256.1 | 30S_ribosomal_protein_S3_[Bacillus_cereus]  | CPTF_Co         | 25268250.47 | 1974110.652 | 7.812613122 |
| UIJ66256.1 | 30S_ribosomal_protein_S3_[Bacillus_cereus]  | CPTF_Cu         | 22998825.67 | 403852.8273 | 1.755971514 |
| UIJ66256.1 | 30S_ribosomal_protein_S3_[Bacillus_cereus]  | CPTF_Fe         | 23981467.77 | 1105370.986 | 4.609271612 |
| UIJ66256.1 | 30S_ribosomal_protein_S3_[Bacillus_cereus]  | CPTF_Mn         | 24030673.3  | 2666606.997 | 11.09668033 |
| UIJ66256.1 | 30S_ribosomal_protein_S3_[Bacillus_cereus]  | CPTF_Ni         | 19488494    | 1231960.191 | 6.321474561 |
| UIJ66256.1 | 30S_ribosomal_protein_S3_[Bacillus_cereus]  | CPTF_U          | 20782696    | 1680164.921 | 8.0844416   |
| UIJ66256.1 | 30S_ribosomal_protein_S3_[Bacillus_cereus]  | CPTF_metals_mix | 20841198.47 | 328146.1587 | 1.574507144 |
| UIJ66256.1 | 30S_ribosomal_protein_S3_[Bacillus_cereus]  | CPTF_zcontrol   | 24005780    | 2113310.103 | 8.803338623 |
| UIJ66257.1 | 50S_ribosomal_protein_L22_[Bacillus_cereus] | CPTF_Al         | 4219483.333 | 560264.7763 | 13.27804217 |
| UIJ66257.1 | 50S_ribosomal_protein_L22_[Bacillus_cereus] | CPTF_Cd         | 5459624.967 | 233806.605  | 4.282466404 |
| UIJ66257.1 | 50S_ribosomal_protein_L22_[Bacillus_cereus] | CPTF_Co         | 4801885     | 101624.9541 | 2.11635434  |
| UIJ66257.1 | 50S_ribosomal_protein_L22_[Bacillus_cereus] | CPTF_Cu         | 4416094.6   | 444990.2493 | 10.07655609 |
| UIJ66257.1 | 50S_ribosomal_protein_L22_[Bacillus_cereus] | CPTF_Fe         | 4336123.633 | 727070.0678 | 16.76774302 |
| UIJ66257.1 | 50S_ribosomal_protein_L22_[Bacillus_cereus] | CPTF_Mn         | 5144330.5   | 2457925.316 | 47.77930415 |
| UIJ66257.1 | 50S_ribosomal_protein_L22_[Bacillus_cereus] | CPTF_Ni         | 3315116.333 | 463567.4255 | 13.98344368 |
| UIJ66257.1 | 50S_ribosomal_protein_L22_[Bacillus_cereus] | CPTF_U          | 2848534.667 | 362559.1467 | 12.72791765 |
| UIJ66257.1 | 50S_ribosomal_protein_L22_[Bacillus_cereus] | CPTF_metals_mix | 9491052.467 | 2387228.681 | 25.15241265 |
| UIJ66257.1 | 50S_ribosomal_protein_L22_[Bacillus_cereus] | CPTF_zcontrol   | 3848023.667 | 721244.7617 | 18.74325171 |
| UIJ66258.1 | 30S_ribosomal_protein_S19_[Bacillus_cereus] | CPTF_Al         | 3091246.1   | 143864.75   | 4.653940363 |
| UIJ66258.1 | 30S_ribosomal_protein_S19_[Bacillus_cereus] | CPTF_Cd         | 3075072.667 | 23307.50228 | 0.757949642 |
| UIJ66258.1 | 30S_ribosomal_protein_S19_[Bacillus_cereus] | CPTF_Co         | 3320762.333 | 73130.83677 | 2.202230374 |
| UIJ66258.1 | 30S_ribosomal_protein_S19_[Bacillus_cereus] | CPTF_Cu         | 2915579.333 | 214822.1693 | 7.36807834  |
| UIJ66258.1 | 30S_ribosomal_protein_S19_[Bacillus_cereus] | CPTF_Fe         | 3221369.333 | 180790.7337 | 5.612232409 |
| UIJ66258.1 | 30S_ribosomal_protein_S19_[Bacillus_cereus] | CPTF_Mn         | 3007175.767 | 94472.58192 | 3.141571669 |
| UIJ66258.1 | 30S_ribosomal_protein_S19_[Bacillus_cereus] | CPTF_Ni         | 3060736.4   | 119589.928  | 3.907227294 |
| UIJ66258.1 | 30S_ribosomal_protein_S19_[Bacillus_cereus] | CPTF_U          | 2857377.333 | 110994.468  | 3.884487593 |
| UIJ66258.1 | 30S_ribosomal_protein_S19_[Bacillus_cereus] | CPTF_metals_mix | 2409574.7   | 535839.6758 | 22.23793584 |
| UIJ66258.1 | 30S_ribosomal_protein_S19_[Bacillus_cereus] | CPTF_zcontrol   | 3182602.867 | 120594.9887 | 3.789193743 |
| UIJ66259.1 | 50S_ribosomal_protein_L2_[Bacillus_cereus]  | CPTF_Al         | 14602382.1  | 712246.844  | 4.877607223 |
| UIJ66259.1 | 50S_ribosomal_protein_L2_[Bacillus_cereus]  | CPTF_Cd         | 15989194.3  | 668415.6177 | 4.180420884 |
| UIJ66259.1 | 50S_ribosomal_protein_L2_[Bacillus_cereus]  | CPTF_Co         | 16599309.5  | 394276.5026 | 2.375258457 |
| UIJ66259.1 | 50S_ribosomal_protein_L2_[Bacillus_cereus]  | CPTF_Cu         | 14453636.33 | 676296.216  | 4.679073144 |
| UIJ66259.1 | 50S_ribosomal_protein_L2_[Bacillus_cereus]  | CPTF_Fe         | 15046651.27 | 893219.2761 | 5.936332678 |
| UIJ66259.1 | 50S_ribosomal_protein_L2_[Bacillus_cereus]  | CPTF_Mn         | 15699618.37 | 1353422.728 | 8.620736484 |
| UIJ66259.1 | 50S_ribosomal_protein_L2_[Bacillus_cereus]  | CPTF_Ni         | 12558633.03 | 672883.9151 | 5.357939143 |
| UIJ66259.1 | 50S_ribosomal_protein_L2_[Bacillus_cereus]  | CPTF_U          | 14040662.87 | 1752290.945 | 12.48011552 |
| UIJ66259.1 | 50S_ribosomal_protein_L2_[Bacillus_cereus]  | CPTF_metals_mix | 14690117.67 | 1014556.709 | 6.90638926  |
| UIJ66259.1 | 50S_ribosomal_protein_L2_[Bacillus_cereus]  | CPTF_zcontrol   | 14383011.07 | 1114552.071 | 7.749087209 |
| UIJ66260.1 | 50S_ribosomal_protein_L23_[Bacillus_cereus] | CPTF_Al         | 17498783.73 | 463414.7496 | 2.648268341 |
| UIJ66260.1 | 50S_ribosomal_protein_L23_[Bacillus_cereus] | CPTF_Cd         | 16778425.67 | 1814313.697 | 10.81337268 |
| UIJ66260.1 | 50S_ribosomal_protein_L23_[Bacillus_cereus] | CPTF_Co         | 18031245.67 | 724686.896  | 4.019061741 |
| UIJ66260.1 | 50S_ribosomal_protein_L23_[Bacillus_cereus] | CPTF_Cu         | 17289803.67 | 1699427.907 | 9.829075793 |
| UIJ66260.1 | 50S_ribosomal_protein_L23_[Bacillus_cereus] | CPTF_Fe         | 17350000    | 857146.4286 | 4.940325237 |
| UIJ66260.1 | 50S_ribosomal_protein_L23_[Bacillus_cereus] | CPTF_Mn         | 17499617    | 3390481.315 | 19.37460297 |

|            |                                             |                 |             |             |             |
|------------|---------------------------------------------|-----------------|-------------|-------------|-------------|
| UIJ66260.1 | 50S_ribosomal_protein_L23_[Bacillus_cereus] | CPTF_Ni         | 18089033.33 | 1517554.122 | 8.389359973 |
| UIJ66260.1 | 50S_ribosomal_protein_L23_[Bacillus_cereus] | CPTF_U          | 17634498.23 | 1251414.04  | 7.096397204 |
| UIJ66260.1 | 50S_ribosomal_protein_L23_[Bacillus_cereus] | CPTF_metals_mix | 12582264    | 699163.7114 | 5.556740118 |
| UIJ66260.1 | 50S_ribosomal_protein_L23_[Bacillus_cereus] | CPTF_zcontrol   | 17923125.33 | 410048.7326 | 2.287819368 |
| UIJ66261.1 | 50S_ribosomal_protein_L4_[Bacillus_cereus]  | CPTF_Al         | 18409569    | 971936.0858 | 5.279515701 |
| UIJ66261.1 | 50S_ribosomal_protein_L4_[Bacillus_cereus]  | CPTF_Cd         | 19296564.8  | 1381300.798 | 7.158273052 |
| UIJ66261.1 | 50S_ribosomal_protein_L4_[Bacillus_cereus]  | CPTF_Co         | 20313929    | 1698733.952 | 8.362409616 |
| UIJ66261.1 | 50S_ribosomal_protein_L4_[Bacillus_cereus]  | CPTF_Cu         | 17378788.33 | 636660.2345 | 3.663432814 |
| UIJ66261.1 | 50S_ribosomal_protein_L4_[Bacillus_cereus]  | CPTF_Fe         | 19373293.43 | 708043.9941 | 3.654742527 |
| UIJ66261.1 | 50S_ribosomal_protein_L4_[Bacillus_cereus]  | CPTF_Mn         | 20650891.3  | 1122838.824 | 5.437241463 |
| UIJ66261.1 | 50S_ribosomal_protein_L4_[Bacillus_cereus]  | CPTF_Ni         | 19456161    | 1528860.31  | 7.857975218 |
| UIJ66261.1 | 50S_ribosomal_protein_L4_[Bacillus_cereus]  | CPTF_U          | 20748040.33 | 1194399.982 | 5.756688163 |
| UIJ66261.1 | 50S_ribosomal_protein_L4_[Bacillus_cereus]  | CPTF_metals_mix | 12826227    | 1372139.369 | 10.69791895 |
| UIJ66261.1 | 50S_ribosomal_protein_L4_[Bacillus_cereus]  | CPTF_zcontrol   | 22158426    | 749463.6346 | 3.382296354 |
| UIJ66262.1 | 50S_ribosomal_protein_L3_[Bacillus_cereus]  | CPTF_Al         | 14136204.9  | 324112.4708 | 2.292782774 |
| UIJ66262.1 | 50S_ribosomal_protein_L3_[Bacillus_cereus]  | CPTF_Cd         | 14269250.07 | 372219.1499 | 2.60854038  |
| UIJ66262.1 | 50S_ribosomal_protein_L3_[Bacillus_cereus]  | CPTF_Co         | 15904913    | 1614309.006 | 10.14975062 |
| UIJ66262.1 | 50S_ribosomal_protein_L3_[Bacillus_cereus]  | CPTF_Cu         | 13454098.67 | 63272.48962 | 0.470284121 |
| UIJ66262.1 | 50S_ribosomal_protein_L3_[Bacillus_cereus]  | CPTF_Fe         | 14009918.57 | 940935.1732 | 6.716207298 |
| UIJ66262.1 | 50S_ribosomal_protein_L3_[Bacillus_cereus]  | CPTF_Mn         | 15129224.33 | 774868.0505 | 5.121664095 |
| UIJ66262.1 | 50S_ribosomal_protein_L3_[Bacillus_cereus]  | CPTF_Ni         | 13057318.33 | 771086.3064 | 5.905395631 |
| UIJ66262.1 | 50S_ribosomal_protein_L3_[Bacillus_cereus]  | CPTF_U          | 13571043.23 | 1275941.037 | 9.401937748 |
| UIJ66262.1 | 50S_ribosomal_protein_L3_[Bacillus_cereus]  | CPTF_metals_mix | 11463571.17 | 428484.6695 | 3.73779395  |
| UIJ66262.1 | 50S_ribosomal_protein_L3_[Bacillus_cereus]  | CPTF_zcontrol   | 15345435.23 | 1056309.663 | 6.883543197 |
| UIJ66263.1 | 30S_ribosomal_protein_S10_[Bacillus_cereus] | CPTF_Al         | 5650000     | 793032.1557 | 14.03596736 |
| UIJ66263.1 | 30S_ribosomal_protein_S10_[Bacillus_cereus] | CPTF_Cd         | 6063333.333 | 354729.9442 | 5.850411395 |
| UIJ66263.1 | 30S_ribosomal_protein_S10_[Bacillus_cereus] | CPTF_Co         | 5453333.333 | 212210.5872 | 3.891392186 |
| UIJ66263.1 | 30S_ribosomal_protein_S10_[Bacillus_cereus] | CPTF_Cu         | 5106666.667 | 290229.794  | 5.683351058 |
| UIJ66263.1 | 30S_ribosomal_protein_S10_[Bacillus_cereus] | CPTF_Fe         | 6230000     | 970412.2835 | 15.57644115 |
| UIJ66263.1 | 30S_ribosomal_protein_S10_[Bacillus_cereus] | CPTF_Mn         | 5493998.133 | 922053.2757 | 16.78291935 |
| UIJ66263.1 | 30S_ribosomal_protein_S10_[Bacillus_cereus] | CPTF_Ni         | 4993333.333 | 858739.3862 | 17.19771801 |
| UIJ66263.1 | 30S_ribosomal_protein_S10_[Bacillus_cereus] | CPTF_U          | 7936666.667 | 232880.513  | 2.934235779 |
| UIJ66263.1 | 30S_ribosomal_protein_S10_[Bacillus_cereus] | CPTF_metals_mix | 7047058.367 | 400838.845  | 5.688030723 |
| UIJ66263.1 | 30S_ribosomal_protein_S10_[Bacillus_cereus] | CPTF_zcontrol   | 5280000     | 320780.2986 | 6.075384444 |
| UIJ66264.1 | elongation_factor_Tu_[Bacillus_cereus]      | CPTF_Al         | 121781494.6 | 3995433.11  | 3.280821213 |
| UIJ66264.1 | elongation_factor_Tu_[Bacillus_cereus]      | CPTF_Cd         | 122811388.4 | 4541381.556 | 3.697850513 |
| UIJ66264.1 | elongation_factor_Tu_[Bacillus_cereus]      | CPTF_Co         | 131319415   | 9354466.997 | 7.123445529 |
| UIJ66264.1 | elongation_factor_Tu_[Bacillus_cereus]      | CPTF_Cu         | 124142878.5 | 6995184.665 | 5.634785298 |
| UIJ66264.1 | elongation_factor_Tu_[Bacillus_cereus]      | CPTF_Fe         | 122335866.7 | 4846328.803 | 3.96149464  |
| UIJ66264.1 | elongation_factor_Tu_[Bacillus_cereus]      | CPTF_Mn         | 122362542.5 | 12388100.7  | 10.12409554 |
| UIJ66264.1 | elongation_factor_Tu_[Bacillus_cereus]      | CPTF_Ni         | 126965560.2 | 2889490.738 | 2.27580671  |
| UIJ66264.1 | elongation_factor_Tu_[Bacillus_cereus]      | CPTF_U          | 137565883.1 | 8025315.829 | 5.833798065 |
| UIJ66264.1 | elongation_factor_Tu_[Bacillus_cereus]      | CPTF_metals_mix | 132580952.8 | 19842505.53 | 14.96633198 |
| UIJ66264.1 | elongation_factor_Tu_[Bacillus_cereus]      | CPTF_zcontrol   | 131404039.8 | 3123084.453 | 2.376703531 |
| UIJ66265.1 | elongation_factor_G_[Bacillus_cereus]       | CPTF_Al         | 36605334.87 | 2110760.438 | 5.766264522 |
| UIJ66265.1 | elongation_factor_G_[Bacillus_cereus]       | CPTF_Cd         | 41650853.8  | 3214370.732 | 7.717418584 |
| UIJ66265.1 | elongation_factor_G_[Bacillus_cereus]       | CPTF_Co         | 39070950.1  | 2528522.776 | 6.471618349 |
| UIJ66265.1 | elongation_factor_G_[Bacillus_cereus]       | CPTF_Cu         | 36529706.53 | 1189833.33  | 3.257166408 |
| UIJ66265.1 | elongation_factor_G_[Bacillus_cereus]       | CPTF_Fe         | 38278635.31 | 2427051.468 | 6.340485884 |
| UIJ66265.1 | elongation_factor_G_[Bacillus_cereus]       | CPTF_Mn         | 44282197.7  | 10211536.47 | 23.0601393  |
| UIJ66265.1 | elongation_factor_G_[Bacillus_cereus]       | CPTF_Ni         | 34401885.53 | 1758182.895 | 5.110716659 |
| UIJ66265.1 | elongation_factor_G_[Bacillus_cereus]       | CPTF_U          | 33639025    | 4741371.16  | 14.09485311 |
| UIJ66265.1 | elongation_factor_G_[Bacillus_cereus]       | CPTF_metals_mix | 60703150.23 | 6185597.353 | 10.18991161 |
| UIJ66265.1 | elongation_factor_G_[Bacillus_cereus]       | CPTF_zcontrol   | 36356011.37 | 3030993.728 | 8.336980911 |
| UIJ66266.1 | 30S_ribosomal_protein_S7_[Bacillus_cereus]  | CPTF_Al         | 17016970.77 | 1053349.878 | 6.1899964   |
| UIJ66266.1 | 30S_ribosomal_protein_S7_[Bacillus_cereus]  | CPTF_Cd         | 19273107.5  | 792502.1431 | 4.111958298 |
| UIJ66266.1 | 30S_ribosomal_protein_S7_[Bacillus_cereus]  | CPTF_Co         | 18179438.5  | 358736.0936 | 1.973306786 |
| UIJ66266.1 | 30S_ribosomal_protein_S7_[Bacillus_cereus]  | CPTF_Cu         | 15909420.8  | 696520.3467 | 4.378037111 |
| UIJ66266.1 | 30S_ribosomal_protein_S7_[Bacillus_cereus]  | CPTF_Fe         | 17734384.87 | 1566132.96  | 8.831053186 |
| UIJ66266.1 | 30S_ribosomal_protein_S7_[Bacillus_cereus]  | CPTF_Mn         | 18784597.93 | 2992456.038 | 15.93037045 |
| UIJ66266.1 | 30S_ribosomal_protein_S7_[Bacillus_cereus]  | CPTF_Ni         | 14641152.1  | 800538.245  | 5.467727126 |

|            |                                                             |                 |             |             |             |
|------------|-------------------------------------------------------------|-----------------|-------------|-------------|-------------|
| UIJ66266.1 | 30S_ribosomal_protein_S7 [Bacillus_cereus]                  | CPTF_U          | 15951994.73 | 851096.167  | 5.335358877 |
| UIJ66266.1 | 30S_ribosomal_protein_S7 [Bacillus_cereus]                  | CPTF_metals_mix | 16957719    | 1506287.724 | 8.882608116 |
| UIJ66266.1 | 30S_ribosomal_protein_S7 [Bacillus_cereus]                  | CPTF_zcontrol   | 17849936.67 | 2143949.804 | 12.01096575 |
| UIJ66267.1 | 30S_ribosomal_protein_S12 [Bacillus_cereus]                 | CPTF_Al         | 10542054.83 | 631548.3208 | 5.990751735 |
| UIJ66267.1 | 30S_ribosomal_protein_S12 [Bacillus_cereus]                 | CPTF_Cd         | 11200609.67 | 417780.9807 | 3.729984287 |
| UIJ66267.1 | 30S_ribosomal_protein_S12 [Bacillus_cereus]                 | CPTF_Co         | 11382917.87 | 702908.3173 | 6.175115427 |
| UIJ66267.1 | 30S_ribosomal_protein_S12 [Bacillus_cereus]                 | CPTF_Cu         | 10235728.93 | 831682.5231 | 8.125288668 |
| UIJ66267.1 | 30S_ribosomal_protein_S12 [Bacillus_cereus]                 | CPTF_Fe         | 10675034.13 | 1053417.275 | 9.868045965 |
| UIJ66267.1 | 30S_ribosomal_protein_S12 [Bacillus_cereus]                 | CPTF_Mn         | 11194275.5  | 2191167.802 | 19.57400282 |
| UIJ66267.1 | 30S_ribosomal_protein_S12 [Bacillus_cereus]                 | CPTF_Ni         | 9267264.667 | 1134335.507 | 12.24024075 |
| UIJ66267.1 | 30S_ribosomal_protein_S12 [Bacillus_cereus]                 | CPTF_U          | 9358788.667 | 1266777.985 | 13.53570457 |
| UIJ66267.1 | 30S_ribosomal_protein_S12 [Bacillus_cereus]                 | CPTF_metals_mix | 10679921.9  | 296844.7418 | 2.779465474 |
| UIJ66267.1 | 30S_ribosomal_protein_S12 [Bacillus_cereus]                 | CPTF_zcontrol   | 10808654    | 896244.7775 | 8.291918471 |
| UIJ66269.1 | DNA-directed_RNA_polymerase_subunit_beta' [Bacillus_cereus] | CPTF_Al         | 14844310.8  | 2445822.348 | 16.47649649 |
| UIJ66269.1 | DNA-directed_RNA_polymerase_subunit_beta' [Bacillus_cereus] | CPTF_Cd         | 18480167.1  | 4848020.065 | 26.2336376  |
| UIJ66269.1 | DNA-directed_RNA_polymerase_subunit_beta' [Bacillus_cereus] | CPTF_Co         | 15981474.6  | 910292.1263 | 5.69592074  |
| UIJ66269.1 | DNA-directed_RNA_polymerase_subunit_beta' [Bacillus_cereus] | CPTF_Cu         | 16098681.4  | 987439.5113 | 6.133667018 |
| UIJ66269.1 | DNA-directed_RNA_polymerase_subunit_beta' [Bacillus_cereus] | CPTF_Fe         | 15814432.53 | 1238150.15  | 7.829241721 |
| UIJ66269.1 | DNA-directed_RNA_polymerase_subunit_beta' [Bacillus_cereus] | CPTF_Mn         | 17465516.93 | 4275655.369 | 24.48055437 |
| UIJ66269.1 | DNA-directed_RNA_polymerase_subunit_beta' [Bacillus_cereus] | CPTF_Ni         | 14545290.17 | 388633.9612 | 2.671888678 |
| UIJ66269.1 | DNA-directed_RNA_polymerase_subunit_beta' [Bacillus_cereus] | CPTF_U          | 12414800.67 | 1448346.057 | 11.66628524 |
| UIJ66269.1 | DNA-directed_RNA_polymerase_subunit_beta' [Bacillus_cereus] | CPTF_metals_mix | 24318274.53 | 3818327.761 | 15.70147485 |
| UIJ66269.1 | DNA-directed_RNA_polymerase_subunit_beta' [Bacillus_cereus] | CPTF_zcontrol   | 15934658.47 | 1104728.027 | 6.932862911 |
| UIJ66270.1 | DNA-directed_RNA_polymerase_subunit_beta [Bacillus_cereus]  | CPTF_Al         | 25579069.33 | 2256865.522 | 8.823094744 |
| UIJ66270.1 | DNA-directed_RNA_polymerase_subunit_beta [Bacillus_cereus]  | CPTF_Cd         | 28352952.5  | 615799.1384 | 2.171904808 |
| UIJ66270.1 | DNA-directed_RNA_polymerase_subunit_beta [Bacillus_cereus]  | CPTF_Co         | 27218838.57 | 716032.3624 | 2.630649947 |
| UIJ66270.1 | DNA-directed_RNA_polymerase_subunit_beta [Bacillus_cereus]  | CPTF_Cu         | 25012000.77 | 1007761.443 | 4.029111674 |
| UIJ66270.1 | DNA-directed_RNA_polymerase_subunit_beta [Bacillus_cereus]  | CPTF_Fe         | 25585248.8  | 3086798.811 | 12.0647598  |
| UIJ66270.1 | DNA-directed_RNA_polymerase_subunit_beta [Bacillus_cereus]  | CPTF_Mn         | 26561357.8  | 6103355.462 | 22.97832629 |
| UIJ66270.1 | DNA-directed_RNA_polymerase_subunit_beta [Bacillus_cereus]  | CPTF_Ni         | 20818272.9  | 1553224.108 | 7.460869186 |
| UIJ66270.1 | DNA-directed_RNA_polymerase_subunit_beta [Bacillus_cereus]  | CPTF_U          | 20825408.93 | 1657898.693 | 7.96094184  |
| UIJ66270.1 | DNA-directed_RNA_polymerase_subunit_beta [Bacillus_cereus]  | CPTF_metals_mix | 34446195.3  | 2398850.778 | 6.964051533 |
| UIJ66270.1 | DNA-directed_RNA_polymerase_subunit_beta [Bacillus_cereus]  | CPTF_zcontrol   | 24932197.03 | 2073565.623 | 8.316818689 |
| UIJ66272.1 | 50S_ribosomal_protein_L7/L12 [Bacillus_cereus]              | CPTF_Al         | 51199005.07 | 4568596.709 | 8.923213845 |
| UIJ66272.1 | 50S_ribosomal_protein_L7/L12 [Bacillus_cereus]              | CPTF_Cd         | 55425457.67 | 417803.4882 | 0.753811526 |
| UIJ66272.1 | 50S_ribosomal_protein_L7/L12 [Bacillus_cereus]              | CPTF_Co         | 57225897.33 | 3779879.806 | 6.605190974 |
| UIJ66272.1 | 50S_ribosomal_protein_L7/L12 [Bacillus_cereus]              | CPTF_Cu         | 46986608.67 | 3041930.041 | 6.474036172 |
| UIJ66272.1 | 50S_ribosomal_protein_L7/L12 [Bacillus_cereus]              | CPTF_Fe         | 51815231.2  | 8628820.675 | 16.65305833 |
| UIJ66272.1 | 50S_ribosomal_protein_L7/L12 [Bacillus_cereus]              | CPTF_Mn         | 56105974.83 | 10424179.96 | 18.57944719 |
| UIJ66272.1 | 50S_ribosomal_protein_L7/L12 [Bacillus_cereus]              | CPTF_Ni         | 42027951.53 | 3307168.668 | 7.868974212 |
| UIJ66272.1 | 50S_ribosomal_protein_L7/L12 [Bacillus_cereus]              | CPTF_U          | 46973418.87 | 2770258.902 | 5.897503244 |
| UIJ66272.1 | 50S_ribosomal_protein_L7/L12 [Bacillus_cereus]              | CPTF_metals_mix | 51264701.27 | 3449082.405 | 6.727986938 |
| UIJ66272.1 | 50S_ribosomal_protein_L7/L12 [Bacillus_cereus]              | CPTF_zcontrol   | 53022352.33 | 5935116.26  | 11.19361175 |
| UIJ66273.1 | 50S_ribosomal_protein_L10 [Bacillus_cereus]                 | CPTF_Al         | 19171706.33 | 668961.2196 | 3.489314973 |
| UIJ66273.1 | 50S_ribosomal_protein_L10 [Bacillus_cereus]                 | CPTF_Cd         | 18904828.33 | 826708.1196 | 4.372999876 |
| UIJ66273.1 | 50S_ribosomal_protein_L10 [Bacillus_cereus]                 | CPTF_Co         | 21324936.33 | 686250.0623 | 3.218063827 |
| UIJ66273.1 | 50S_ribosomal_protein_L10 [Bacillus_cereus]                 | CPTF_Cu         | 19690265.33 | 136192.2852 | 0.691673184 |
| UIJ66273.1 | 50S_ribosomal_protein_L10 [Bacillus_cereus]                 | CPTF_Fe         | 19584645.33 | 369701.1295 | 1.887709086 |
| UIJ66273.1 | 50S_ribosomal_protein_L10 [Bacillus_cereus]                 | CPTF_Mn         | 19820346.33 | 344720.3582 | 1.739224696 |
| UIJ66273.1 | 50S_ribosomal_protein_L10 [Bacillus_cereus]                 | CPTF_Ni         | 18935585    | 948439.6184 | 5.008768508 |
| UIJ66273.1 | 50S_ribosomal_protein_L10 [Bacillus_cereus]                 | CPTF_U          | 17587689.33 | 1934758.467 | 11.00064045 |
| UIJ66273.1 | 50S_ribosomal_protein_L10 [Bacillus_cereus]                 | CPTF_metals_mix | 18108395.67 | 1073057.791 | 5.925747433 |
| UIJ66273.1 | 50S_ribosomal_protein_L10 [Bacillus_cereus]                 | CPTF_zcontrol   | 19291739    | 1420879.733 | 7.365223702 |
| UIJ66274.1 | 50S_ribosomal_protein_L1 [Bacillus_cereus]                  | CPTF_Al         | 16294108.67 | 1063852.443 | 6.529061913 |
| UIJ66274.1 | 50S_ribosomal_protein_L1 [Bacillus_cereus]                  | CPTF_Cd         | 17755288.67 | 417839.6106 | 2.353324795 |
| UIJ66274.1 | 50S_ribosomal_protein_L1 [Bacillus_cereus]                  | CPTF_Co         | 18965577.33 | 938136.6879 | 4.946523227 |
| UIJ66274.1 | 50S_ribosomal_protein_L1 [Bacillus_cereus]                  | CPTF_Cu         | 16685643.67 | 1066965.646 | 6.394512953 |
| UIJ66274.1 | 50S_ribosomal_protein_L1 [Bacillus_cereus]                  | CPTF_Fe         | 16454238.67 | 1562664.59  | 9.497033692 |
| UIJ66274.1 | 50S_ribosomal_protein_L1 [Bacillus_cereus]                  | CPTF_Mn         | 17130142.67 | 3519115.78  | 20.54341197 |
| UIJ66274.1 | 50S_ribosomal_protein_L1 [Bacillus_cereus]                  | CPTF_Ni         | 13957830.33 | 2178947.06  | 15.61092955 |
| UIJ66274.1 | 50S_ribosomal_protein_L1 [Bacillus_cereus]                  | CPTF_U          | 12417329.67 | 400781.9925 | 3.227602096 |

|            |                                                                          |                 |             |             |             |
|------------|--------------------------------------------------------------------------|-----------------|-------------|-------------|-------------|
| UIJ66274.1 | 50S_ribosomal_protein_L1 [Bacillus_cereus]                               | CPTF_metals_mix | 18252172.87 | 1035322.277 | 5.672323424 |
| UIJ66274.1 | 50S_ribosomal_protein_L1 [Bacillus_cereus]                               | CPTF_zcontrol   | 16480142.67 | 1263894.264 | 7.669194916 |
| UIJ66275.1 | 50S_ribosomal_protein_L11 [Bacillus_cereus]                              | CPTF_Al         | 7956293     | 470851.6721 | 5.917978035 |
| UIJ66275.1 | 50S_ribosomal_protein_L11 [Bacillus_cereus]                              | CPTF_Cd         | 8322204.667 | 249611.3636 | 2.999341805 |
| UIJ66275.1 | 50S_ribosomal_protein_L11 [Bacillus_cereus]                              | CPTF_Co         | 8682287     | 415074.1953 | 4.78070116  |
| UIJ66275.1 | 50S_ribosomal_protein_L11 [Bacillus_cereus]                              | CPTF_Cu         | 7701743     | 222714.5572 | 2.891742262 |
| UIJ66275.1 | 50S_ribosomal_protein_L11 [Bacillus_cereus]                              | CPTF_Fe         | 8073842     | 458428.533  | 5.677947786 |
| UIJ66275.1 | 50S_ribosomal_protein_L11 [Bacillus_cereus]                              | CPTF_Mn         | 8299897.667 | 807608.6234 | 9.730344347 |
| UIJ66275.1 | 50S_ribosomal_protein_L11 [Bacillus_cereus]                              | CPTF_Ni         | 7028627.967 | 293434.3712 | 4.174845683 |
| UIJ66275.1 | 50S_ribosomal_protein_L11 [Bacillus_cereus]                              | CPTF_U          | 7571557.333 | 554381.7825 | 7.321899025 |
| UIJ66275.1 | 50S_ribosomal_protein_L11 [Bacillus_cereus]                              | CPTF_metals_mix | 6035185.667 | 334762.9767 | 5.546854649 |
| UIJ66275.1 | 50S_ribosomal_protein_L11 [Bacillus_cereus]                              | CPTF_zcontrol   | 8254556.667 | 791243.7428 | 9.585538931 |
| UIJ66276.1 | transcription_termination/antitermination_protein_NusG [Bacillus_cereus] | CPTF_Al         | 1086645.033 | 166094.0803 | 15.28503561 |
| UIJ66276.1 | transcription_termination/antitermination_protein_NusG [Bacillus_cereus] | CPTF_Cd         | 1403628.067 | 115718.2578 | 8.244225127 |
| UIJ66276.1 | transcription_termination/antitermination_protein_NusG [Bacillus_cereus] | CPTF_Co         | 1489860.2   | 52972.38844 | 3.555524098 |
| UIJ66276.1 | transcription_termination/antitermination_protein_NusG [Bacillus_cereus] | CPTF_Cu         | 1434165.367 | 91426.40463 | 6.374885823 |
| UIJ66276.1 | transcription_termination/antitermination_protein_NusG [Bacillus_cereus] | CPTF_Fe         | 1248574.4   | 76295.65041 | 6.110621074 |
| UIJ66276.1 | transcription_termination/antitermination_protein_NusG [Bacillus_cereus] | CPTF_Mn         | 1298616.567 | 180500.006  | 13.89940731 |
| UIJ66276.1 | transcription_termination/antitermination_protein_NusG [Bacillus_cereus] | CPTF_Ni         | 1431992.9   | 35618.30005 | 2.487323788 |
| UIJ66276.1 | transcription_termination/antitermination_protein_NusG [Bacillus_cereus] | CPTF_U          | 1268200.167 | 582931.1708 | 45.96523373 |
| UIJ66276.1 | transcription_termination/antitermination_protein_NusG [Bacillus_cereus] | CPTF_metals_mix | 1692838.633 | 110431.8982 | 6.523474596 |
| UIJ66276.1 | transcription_termination/antitermination_protein_NusG [Bacillus_cereus] | CPTF_zcontrol   | 1064999.833 | 75108.20064 | 7.052414309 |
| UIJ66279.1 | RNA_polymerase_sporulation_sigma_factor_SigH [Bacillus_cereus]           | CPTF_Al         | 277525.2    | 323065.6914 | 11.63980393 |
| UIJ66279.1 | RNA_polymerase_sporulation_sigma_factor_SigH [Bacillus_cereus]           | CPTF_Cd         | 3022141.633 | 533239.3811 | 17.64442061 |
| UIJ66279.1 | RNA_polymerase_sporulation_sigma_factor_SigH [Bacillus_cereus]           | CPTF_Co         | 2949464.13  | 259599.9959 | 8.801598677 |
| UIJ66279.1 | RNA_polymerase_sporulation_sigma_factor_SigH [Bacillus_cereus]           | CPTF_Cu         | 2577818.2   | 433764.5459 | 16.82680904 |
| UIJ66279.1 | RNA_polymerase_sporulation_sigma_factor_SigH [Bacillus_cereus]           | CPTF_Fe         | 3121740.8   | 513948.5834 | 16.4635252  |
| UIJ66279.1 | RNA_polymerase_sporulation_sigma_factor_SigH [Bacillus_cereus]           | CPTF_Mn         | 3043177.2   | 398039.192  | 13.07972444 |
| UIJ66279.1 | RNA_polymerase_sporulation_sigma_factor_SigH [Bacillus_cereus]           | CPTF_Ni         | 2813332.533 | 348473.9012 | 12.3865166  |
| UIJ66279.1 | RNA_polymerase_sporulation_sigma_factor_SigH [Bacillus_cereus]           | CPTF_U          | 2804783.433 | 590751.2421 | 21.06227651 |
| UIJ66279.1 | RNA_polymerase_sporulation_sigma_factor_SigH [Bacillus_cereus]           | CPTF_metals_mix | 2123301.233 | 656949.6409 | 30.94001127 |
| UIJ66279.1 | RNA_polymerase_sporulation_sigma_factor_SigH [Bacillus_cereus]           | CPTF_zcontrol   | 2880003     | 483459.146  | 16.78675842 |
| UIJ66281.1 | 23S_rRNA (guanosine(2251)-2'-O)-methyltransferase_RlmB [Bacillus_cereus] | CPTF_Al         | 0           | 0           | 0           |
| UIJ66281.1 | 23S_rRNA (guanosine(2251)-2'-O)-methyltransferase_RlmB [Bacillus_cereus] | CPTF_Cd         | 187899      | 23082.65676 | 12.28460862 |
| UIJ66281.1 | 23S_rRNA (guanosine(2251)-2'-O)-methyltransferase_RlmB [Bacillus_cereus] | CPTF_Co         | 124658.7333 | 53456.92381 | 42.8826143  |
| UIJ66281.1 | 23S_rRNA (guanosine(2251)-2'-O)-methyltransferase_RlmB [Bacillus_cereus] | CPTF_Cu         | 86330.4     | 149528.639  | 173.2050808 |
| UIJ66281.1 | 23S_rRNA (guanosine(2251)-2'-O)-methyltransferase_RlmB [Bacillus_cereus] | CPTF_Fe         | 92179       | 82710.56324 | 89.72820625 |
| UIJ66281.1 | 23S_rRNA (guanosine(2251)-2'-O)-methyltransferase_RlmB [Bacillus_cereus] | CPTF_Mn         | 78514.33333 | 135990.8145 | 173.2050808 |
| UIJ66281.1 | 23S_rRNA (guanosine(2251)-2'-O)-methyltransferase_RlmB [Bacillus_cereus] | CPTF_Ni         | 89056.66667 | 78390.70221 | 88.02339582 |
| UIJ66281.1 | 23S_rRNA (guanosine(2251)-2'-O)-methyltransferase_RlmB [Bacillus_cereus] | CPTF_U          | 60117.96667 | 52080.4741  | 86.63046504 |
| UIJ66281.1 | 23S_rRNA (guanosine(2251)-2'-O)-methyltransferase_RlmB [Bacillus_cereus] | CPTF_metals_mix | 707683.1333 | 22696.23403 | 3.207118125 |
| UIJ66281.1 | 23S_rRNA (guanosine(2251)-2'-O)-methyltransferase_RlmB [Bacillus_cereus] | CPTF_zcontrol   | 74572.3     | 66576.41747 | 89.27767746 |
| UIJ66283.1 | cysteine--tRNA_ligase [Bacillus_cereus]                                  | CPTF_Al         | 1562262.533 | 321305.9889 | 20.56670899 |
| UIJ66283.1 | cysteine--tRNA_ligase [Bacillus_cereus]                                  | CPTF_Cd         | 1730147.567 | 513162.1744 | 29.66002347 |
| UIJ66283.1 | cysteine--tRNA_ligase [Bacillus_cereus]                                  | CPTF_Co         | 1982873.167 | 129374.5365 | 6.524599691 |
| UIJ66283.1 | cysteine--tRNA_ligase [Bacillus_cereus]                                  | CPTF_Cu         | 1837642.9   | 287324.8292 | 15.63550944 |
| UIJ66283.1 | cysteine--tRNA_ligase [Bacillus_cereus]                                  | CPTF_Fe         | 1710965.933 | 220684.2162 | 12.89822386 |
| UIJ66283.1 | cysteine--tRNA_ligase [Bacillus_cereus]                                  | CPTF_Mn         | 1651987.6   | 523526.2738 | 31.69069028 |
| UIJ66283.1 | cysteine--tRNA_ligase [Bacillus_cereus]                                  | CPTF_Ni         | 2026087.167 | 33337.50616 | 1.645413223 |
| UIJ66283.1 | cysteine--tRNA_ligase [Bacillus_cereus]                                  | CPTF_U          | 1921427.8   | 265380.0446 | 13.81160638 |
| UIJ66283.1 | cysteine--tRNA_ligase [Bacillus_cereus]                                  | CPTF_metals_mix | 2866231.067 | 188771.5038 | 6.586053232 |
| UIJ66283.1 | cysteine--tRNA_ligase [Bacillus_cereus]                                  | CPTF_zcontrol   | 1001446.6   | 884.8106916 | 0.088353257 |
| UIJ66285.1 | glutamate--tRNA_ligase [Bacillus_cereus]                                 | CPTF_Al         | 5744637.567 | 64116.82014 | 1.11611602  |
| UIJ66285.1 | glutamate--tRNA_ligase [Bacillus_cereus]                                 | CPTF_Cd         | 5509804.6   | 451067.6774 | 8.186636553 |
| UIJ66285.1 | glutamate--tRNA_ligase [Bacillus_cereus]                                 | CPTF_Co         | 5307619.833 | 657236.5794 | 12.38288725 |
| UIJ66285.1 | glutamate--tRNA_ligase [Bacillus_cereus]                                 | CPTF_Cu         | 5500089.767 | 285654.3457 | 5.19363061  |
| UIJ66285.1 | glutamate--tRNA_ligase [Bacillus_cereus]                                 | CPTF_Fe         | 5265954.233 | 207807.802  | 3.946251577 |
| UIJ66285.1 | glutamate--tRNA_ligase [Bacillus_cereus]                                 | CPTF_Mn         | 5103693.7   | 338963.9701 | 6.641542186 |
| UIJ66285.1 | glutamate--tRNA_ligase [Bacillus_cereus]                                 | CPTF_Ni         | 4930607.5   | 482741.2103 | 9.790704498 |
| UIJ66285.1 | glutamate--tRNA_ligase [Bacillus_cereus]                                 | CPTF_U          | 4752505.2   | 411922.0341 | 8.667471507 |
| UIJ66285.1 | glutamate--tRNA_ligase [Bacillus_cereus]                                 | CPTF_metals_mix | 6029713.067 | 449336.2459 | 7.452033636 |

|            |                                                                         |                 |             |             |             |
|------------|-------------------------------------------------------------------------|-----------------|-------------|-------------|-------------|
| UIJ66285.1 | glutamate--tRNA_ligase [Bacillus_cereus]                                | CPTF_zcontrol   | 5188578.533 | 112803.9299 | 2.174081575 |
| UIJ66286.1 | 2-C-methyl-D-erythritol_2,4-cyclodiphosphate_synthase [Bacillus_cereus] | CPTF_Al         | 49210.4     | 44289.34993 | 89.99997953 |
| UIJ66286.1 | 2-C-methyl-D-erythritol_2,4-cyclodiphosphate_synthase [Bacillus_cereus] | CPTF_Cd         | 35746       | 61913.88817 | 173.2050808 |
| UIJ66286.1 | 2-C-methyl-D-erythritol_2,4-cyclodiphosphate_synthase [Bacillus_cereus] | CPTF_Co         | 108470.3333 | 6587.019837 | 6.072646441 |
| UIJ66286.1 | 2-C-methyl-D-erythritol_2,4-cyclodiphosphate_synthase [Bacillus_cereus] | CPTF_Cu         | 72357       | 62839.12546 | 86.84595197 |
| UIJ66286.1 | 2-C-methyl-D-erythritol_2,4-cyclodiphosphate_synthase [Bacillus_cereus] | CPTF_Fe         | 56229.26667 | 48775.85055 | 86.74459661 |
| UIJ66286.1 | 2-C-methyl-D-erythritol_2,4-cyclodiphosphate_synthase [Bacillus_cereus] | CPTF_Mn         | 73438.33333 | 63716.27888 | 86.76160799 |
| UIJ66286.1 | 2-C-methyl-D-erythritol_2,4-cyclodiphosphate_synthase [Bacillus_cereus] | CPTF_Ni         | 33026.8     | 29662.43218 | 89.8132189  |
| UIJ66286.1 | 2-C-methyl-D-erythritol_2,4-cyclodiphosphate_synthase [Bacillus_cereus] | CPTF_U          | 0           | 0           | 0           |
| UIJ66286.1 | 2-C-methyl-D-erythritol_2,4-cyclodiphosphate_synthase [Bacillus_cereus] | CPTF_metals_mix | 0           | 0           | 0           |
| UIJ66286.1 | 2-C-methyl-D-erythritol_2,4-cyclodiphosphate_synthase [Bacillus_cereus] | CPTF_zcontrol   | 0           | 0           | 0           |
| UIJ66288.1 | PIN/TRAM_domain-containing_protein [Bacillus_cereus]                    | CPTF_Al         | 19423.96667 | 17792.12573 | 91.59882755 |
| UIJ66288.1 | PIN/TRAM_domain-containing_protein [Bacillus_cereus]                    | CPTF_Cd         | 0           | 0           | 0           |
| UIJ66288.1 | PIN/TRAM_domain-containing_protein [Bacillus_cereus]                    | CPTF_Co         | 5349.1      | 9264.912975 | 173.2050808 |
| UIJ66288.1 | PIN/TRAM_domain-containing_protein [Bacillus_cereus]                    | CPTF_Cu         | 0           | 0           | 0           |
| UIJ66288.1 | PIN/TRAM_domain-containing_protein [Bacillus_cereus]                    | CPTF_Fe         | 7170.2      | 12419.1507  | 173.2050808 |
| UIJ66288.1 | PIN/TRAM_domain-containing_protein [Bacillus_cereus]                    | CPTF_Mn         | 0           | 0           | 0           |
| UIJ66288.1 | PIN/TRAM_domain-containing_protein [Bacillus_cereus]                    | CPTF_Ni         | 13200.8     | 22864.4563  | 173.2050808 |
| UIJ66288.1 | PIN/TRAM_domain-containing_protein [Bacillus_cereus]                    | CPTF_U          | 12053.8     | 20877.79402 | 173.2050808 |
| UIJ66288.1 | PIN/TRAM_domain-containing_protein [Bacillus_cereus]                    | CPTF_metals_mix | 87803.6     | 68543.12841 | 78.06414362 |
| UIJ66288.1 | PIN/TRAM_domain-containing_protein [Bacillus_cereus]                    | CPTF_zcontrol   | 0           | 0           | 0           |
| UIJ66289.1 | DNA_integrity_scanning_diadenylate_cyclase_DisA [Bacillus_cereus]       | CPTF_Al         | 5240.66667  | 9077.100932 | 173.2050808 |
| UIJ66289.1 | DNA_integrity_scanning_diadenylate_cyclase_DisA [Bacillus_cereus]       | CPTF_Cd         | 17522.6     | 19214.0964  | 109.6532273 |
| UIJ66289.1 | DNA_integrity_scanning_diadenylate_cyclase_DisA [Bacillus_cereus]       | CPTF_Co         | 33975.86667 | 30423.44391 | 89.54427627 |
| UIJ66289.1 | DNA_integrity_scanning_diadenylate_cyclase_DisA [Bacillus_cereus]       | CPTF_Cu         | 31659.23333 | 28879.08483 | 91.21852233 |
| UIJ66289.1 | DNA_integrity_scanning_diadenylate_cyclase_DisA [Bacillus_cereus]       | CPTF_Fe         | 0           | 0           | 0           |
| UIJ66289.1 | DNA_integrity_scanning_diadenylate_cyclase_DisA [Bacillus_cereus]       | CPTF_Mn         | 0           | 0           | 0           |
| UIJ66289.1 | DNA_integrity_scanning_diadenylate_cyclase_DisA [Bacillus_cereus]       | CPTF_Ni         | 0           | 0           | 0           |
| UIJ66289.1 | DNA_integrity_scanning_diadenylate_cyclase_DisA [Bacillus_cereus]       | CPTF_U          | 0           | 0           | 0           |
| UIJ66289.1 | DNA_integrity_scanning_diadenylate_cyclase_DisA [Bacillus_cereus]       | CPTF_metals_mix | 83366       | 21492.43714 | 25.78081849 |
| UIJ66289.1 | DNA_integrity_scanning_diadenylate_cyclase_DisA [Bacillus_cereus]       | CPTF_zcontrol   | 10397.56667 | 18009.11374 | 173.2050808 |
| UIJ66290.1 | DNA_repair_protein_RadA [Bacillus_cereus]                               | CPTF_Al         | 0           | 0           | 0           |
| UIJ66290.1 | DNA_repair_protein_RadA [Bacillus_cereus]                               | CPTF_Cd         | 0           | 0           | 0           |
| UIJ66290.1 | DNA_repair_protein_RadA [Bacillus_cereus]                               | CPTF_Co         | 0           | 0           | 0           |
| UIJ66290.1 | DNA_repair_protein_RadA [Bacillus_cereus]                               | CPTF_Cu         | 39770.1     | 37703.45478 | 94.80352019 |
| UIJ66290.1 | DNA_repair_protein_RadA [Bacillus_cereus]                               | CPTF_Fe         | 0           | 0           | 0           |
| UIJ66290.1 | DNA_repair_protein_RadA [Bacillus_cereus]                               | CPTF_Mn         | 11423.26667 | 19785.67826 | 173.2050808 |
| UIJ66290.1 | DNA_repair_protein_RadA [Bacillus_cereus]                               | CPTF_Ni         | 0           | 0           | 0           |
| UIJ66290.1 | DNA_repair_protein_RadA [Bacillus_cereus]                               | CPTF_U          | 19279.3     | 33392.72713 | 173.2050808 |
| UIJ66290.1 | DNA_repair_protein_RadA [Bacillus_cereus]                               | CPTF_metals_mix | 32785.76667 | 31250.66013 | 95.31776532 |
| UIJ66290.1 | DNA_repair_protein_RadA [Bacillus_cereus]                               | CPTF_zcontrol   | 0           | 0           | 0           |
| UIJ66291.1 | ATP-dependent_protease_ATP-binding_subunit_ClpC [Bacillus_cereus]       | CPTF_Al         | 8182831.767 | 319786.7108 | 3.908020107 |
| UIJ66291.1 | ATP-dependent_protease_ATP-binding_subunit_ClpC [Bacillus_cereus]       | CPTF_Cd         | 9753838.633 | 626042.5668 | 6.418422432 |
| UIJ66291.1 | ATP-dependent_protease_ATP-binding_subunit_ClpC [Bacillus_cereus]       | CPTF_Co         | 8500956.867 | 507453.5332 | 5.96936958  |
| UIJ66291.1 | ATP-dependent_protease_ATP-binding_subunit_ClpC [Bacillus_cereus]       | CPTF_Cu         | 8180105.833 | 514973.6299 | 6.295439697 |
| UIJ66291.1 | ATP-dependent_protease_ATP-binding_subunit_ClpC [Bacillus_cereus]       | CPTF_Fe         | 8234696.033 | 412445.6076 | 5.008631842 |
| UIJ66291.1 | ATP-dependent_protease_ATP-binding_subunit_ClpC [Bacillus_cereus]       | CPTF_Mn         | 8453418.533 | 1195906.897 | 14.14702102 |
| UIJ66291.1 | ATP-dependent_protease_ATP-binding_subunit_ClpC [Bacillus_cereus]       | CPTF_Ni         | 7250469.733 | 187475.4021 | 2.585700866 |
| UIJ66291.1 | ATP-dependent_protease_ATP-binding_subunit_ClpC [Bacillus_cereus]       | CPTF_U          | 6988018.967 | 469417.1336 | 6.717456491 |
| UIJ66291.1 | ATP-dependent_protease_ATP-binding_subunit_ClpC [Bacillus_cereus]       | CPTF_metals_mix | 16036268.47 | 1770137.264 | 11.03833643 |
| UIJ66291.1 | ATP-dependent_protease_ATP-binding_subunit_ClpC [Bacillus_cereus]       | CPTF_zcontrol   | 6850404.367 | 1156187.287 | 16.87765021 |
| UIJ66292.1 | protein_arginine_kinase [Bacillus_cereus]                               | CPTF_Al         | 48264       | 83595.70018 | 173.2050808 |
| UIJ66292.1 | protein_arginine_kinase [Bacillus_cereus]                               | CPTF_Cd         | 151404.3333 | 160197.8637 | 105.807978  |
| UIJ66292.1 | protein_arginine_kinase [Bacillus_cereus]                               | CPTF_Co         | 158937.3333 | 27071.97552 | 17.03311296 |
| UIJ66292.1 | protein_arginine_kinase [Bacillus_cereus]                               | CPTF_Cu         | 38631       | 66910.85475 | 173.2050808 |
| UIJ66292.1 | protein_arginine_kinase [Bacillus_cereus]                               | CPTF_Fe         | 211057.6667 | 206448.2416 | 97.81603523 |
| UIJ66292.1 | protein_arginine_kinase [Bacillus_cereus]                               | CPTF_Mn         | 98219.6     | 122948.1475 | 125.1767952 |
| UIJ66292.1 | protein_arginine_kinase [Bacillus_cereus]                               | CPTF_Ni         | 67280.33333 | 72685.54947 | 108.0338724 |
| UIJ66292.1 | protein_arginine_kinase [Bacillus_cereus]                               | CPTF_U          | 199164.3333 | 20150.72188 | 10.1176358  |
| UIJ66292.1 | protein_arginine_kinase [Bacillus_cereus]                               | CPTF_metals_mix | 82301       | 71350.99479 | 86.69517355 |
| UIJ66292.1 | protein_arginine_kinase [Bacillus_cereus]                               | CPTF_zcontrol   | 64941.66667 | 112482.2662 | 173.2050808 |

|            |                                                             |                 |             |             |             |
|------------|-------------------------------------------------------------|-----------------|-------------|-------------|-------------|
| UIJ66295.1 | lysine--tRNA_ligase_[Bacillus_cereus]                       | CPTF_Al         | 5691016.4   | 176705.9045 | 3.104997281 |
| UIJ66295.1 | lysine--tRNA_ligase_[Bacillus_cereus]                       | CPTF_Cd         | 5567921.667 | 615859.0654 | 11.06084285 |
| UIJ66295.1 | lysine--tRNA_ligase_[Bacillus_cereus]                       | CPTF_Co         | 5806514.267 | 206571.3764 | 3.557579761 |
| UIJ66295.1 | lysine--tRNA_ligase_[Bacillus_cereus]                       | CPTF_Cu         | 5893340.833 | 474574.2779 | 8.052720712 |
| UIJ66295.1 | lysine--tRNA_ligase_[Bacillus_cereus]                       | CPTF_Fe         | 4628426.267 | 1102464.279 | 23.81941973 |
| UIJ66295.1 | lysine--tRNA_ligase_[Bacillus_cereus]                       | CPTF_Mn         | 5178586.433 | 884996.2702 | 17.08953363 |
| UIJ66295.1 | lysine--tRNA_ligase_[Bacillus_cereus]                       | CPTF_Ni         | 4680808.1   | 619319.3874 | 13.23103563 |
| UIJ66295.1 | lysine--tRNA_ligase_[Bacillus_cereus]                       | CPTF_U          | 4271273.133 | 723234.9147 | 16.93253726 |
| UIJ66295.1 | lysine--tRNA_ligase_[Bacillus_cereus]                       | CPTF_metals_mix | 7656295.067 | 924975.9133 | 12.08124694 |
| UIJ66295.1 | lysine--tRNA_ligase_[Bacillus_cereus]                       | CPTF_zcontrol   | 4896405.567 | 192569.6362 | 3.932877569 |
| UIJ66300.1 | dihydropteroate_synthase_[Bacillus_cereus]                  | CPTF_Al         | 959817.6667 | 215835.4959 | 22.48713515 |
| UIJ66300.1 | dihydropteroate_synthase_[Bacillus_cereus]                  | CPTF_Cd         | 770548.7667 | 359969.3039 | 46.71596652 |
| UIJ66300.1 | dihydropteroate_synthase_[Bacillus_cereus]                  | CPTF_Co         | 1150699.2   | 60441.24951 | 5.252567266 |
| UIJ66300.1 | dihydropteroate_synthase_[Bacillus_cereus]                  | CPTF_Cu         | 1164383.667 | 55423.43222 | 4.759894338 |
| UIJ66300.1 | dihydropteroate_synthase_[Bacillus_cereus]                  | CPTF_Fe         | 824117.9667 | 206510.4695 | 25.05836274 |
| UIJ66300.1 | dihydropteroate_synthase_[Bacillus_cereus]                  | CPTF_Mn         | 651220.6667 | 124176.3583 | 19.06824593 |
| UIJ66300.1 | dihydropteroate_synthase_[Bacillus_cereus]                  | CPTF_Ni         | 996491.2333 | 25800.70174 | 2.589154915 |
| UIJ66300.1 | dihydropteroate_synthase_[Bacillus_cereus]                  | CPTF_U          | 791594.2667 | 131744.3521 | 16.64291388 |
| UIJ66300.1 | dihydropteroate_synthase_[Bacillus_cereus]                  | CPTF_metals_mix | 925868.3333 | 89155.52126 | 9.629395244 |
| UIJ66300.1 | dihydropteroate_synthase_[Bacillus_cereus]                  | CPTF_zcontrol   | 1030593.4   | 121276.0423 | 11.76759353 |
| UIJ66303.1 | aminodeoxychorismate_synthase_component_I_[Bacillus_cereus] | CPTF_Al         | 11741.6     | 20337.04776 | 173.2050808 |
| UIJ66303.1 | aminodeoxychorismate_synthase_component_I_[Bacillus_cereus] | CPTF_Cd         | 0           | 0           | 0           |
| UIJ66303.1 | aminodeoxychorismate_synthase_component_I_[Bacillus_cereus] | CPTF_Co         | 0           | 0           | 0           |
| UIJ66303.1 | aminodeoxychorismate_synthase_component_I_[Bacillus_cereus] | CPTF_Cu         | 20705.56667 | 18530.50549 | 89.49528304 |
| UIJ66303.1 | aminodeoxychorismate_synthase_component_I_[Bacillus_cereus] | CPTF_Fe         | 21647.46667 | 37494.51212 | 173.2050808 |
| UIJ66303.1 | aminodeoxychorismate_synthase_component_I_[Bacillus_cereus] | CPTF_Mn         | 18001.43333 | 31179.39714 | 173.2050808 |
| UIJ66303.1 | aminodeoxychorismate_synthase_component_I_[Bacillus_cereus] | CPTF_Ni         | 74629.13333 | 70515.95835 | 94.488513   |
| UIJ66303.1 | aminodeoxychorismate_synthase_component_I_[Bacillus_cereus] | CPTF_U          | 0           | 0           | 0           |
| UIJ66303.1 | aminodeoxychorismate_synthase_component_I_[Bacillus_cereus] | CPTF_metals_mix | 33989.86667 | 29675.295   | 87.3063001  |
| UIJ66303.1 | aminodeoxychorismate_synthase_component_I_[Bacillus_cereus] | CPTF_zcontrol   | 0           | 0           | 0           |
| UIJ66304.1 | cysteine_synthase_A_[Bacillus_cereus]                       | CPTF_Al         | 3284055.5   | 592477.913  | 18.04104446 |
| UIJ66304.1 | cysteine_synthase_A_[Bacillus_cereus]                       | CPTF_Cd         | 4128218.6   | 513825.3579 | 12.4466606  |
| UIJ66304.1 | cysteine_synthase_A_[Bacillus_cereus]                       | CPTF_Co         | 2878979.767 | 300822.5412 | 10.44892863 |
| UIJ66304.1 | cysteine_synthase_A_[Bacillus_cereus]                       | CPTF_Cu         | 3218627     | 206949.6096 | 6.429748138 |
| UIJ66304.1 | cysteine_synthase_A_[Bacillus_cereus]                       | CPTF_Fe         | 2774492.067 | 208995.1328 | 7.532734922 |
| UIJ66304.1 | cysteine_synthase_A_[Bacillus_cereus]                       | CPTF_Mn         | 4185839.7   | 2382946.612 | 56.9287594  |
| UIJ66304.1 | cysteine_synthase_A_[Bacillus_cereus]                       | CPTF_Ni         | 2032939.133 | 352349.7349 | 17.33203563 |
| UIJ66304.1 | cysteine_synthase_A_[Bacillus_cereus]                       | CPTF_U          | 1887341.033 | 403278.4117 | 21.36754326 |
| UIJ66304.1 | cysteine_synthase_A_[Bacillus_cereus]                       | CPTF_metals_mix | 12053683.5  | 1383046.507 | 11.47405693 |
| UIJ66304.1 | cysteine_synthase_A_[Bacillus_cereus]                       | CPTF_zcontrol   | 2430207.667 | 399486.9203 | 16.43838614 |
| UIJ66305.1 | redox-regulated_molecular_chaperone_HsIO_[Bacillus_cereus]  | CPTF_Al         | 57541.4     | 14918.93312 | 25.92730299 |
| UIJ66305.1 | redox-regulated_molecular_chaperone_HsIO_[Bacillus_cereus]  | CPTF_Cd         | 104267.7667 | 52796.08646 | 50.6350986  |
| UIJ66305.1 | redox-regulated_molecular_chaperone_HsIO_[Bacillus_cereus]  | CPTF_Co         | 149848.5333 | 45923.44384 | 30.64657546 |
| UIJ66305.1 | redox-regulated_molecular_chaperone_HsIO_[Bacillus_cereus]  | CPTF_Cu         | 121822.8667 | 78945.88384 | 64.80383035 |
| UIJ66305.1 | redox-regulated_molecular_chaperone_HsIO_[Bacillus_cereus]  | CPTF_Fe         | 88215.7     | 77326.68472 | 87.65637491 |
| UIJ66305.1 | redox-regulated_molecular_chaperone_HsIO_[Bacillus_cereus]  | CPTF_Mn         | 185735.6333 | 65112.15595 | 35.05636198 |
| UIJ66305.1 | redox-regulated_molecular_chaperone_HsIO_[Bacillus_cereus]  | CPTF_Ni         | 54050.33333 | 93617.9235  | 173.2050808 |
| UIJ66305.1 | redox-regulated_molecular_chaperone_HsIO_[Bacillus_cereus]  | CPTF_U          | 63549.93333 | 71313.23222 | 112.2160614 |
| UIJ66305.1 | redox-regulated_molecular_chaperone_HsIO_[Bacillus_cereus]  | CPTF_metals_mix | 626700.8333 | 44045.19866 | 7.028105966 |
| UIJ66305.1 | redox-regulated_molecular_chaperone_HsIO_[Bacillus_cereus]  | CPTF_zcontrol   | 161996.5333 | 51994.65057 | 32.09615015 |
| UIJ66307.1 | ATP-dependent_zinc_metalloprotease_FtsH_[Bacillus_cereus]   | CPTF_Al         | 8134400.533 | 553768.7325 | 6.807738692 |
| UIJ66307.1 | ATP-dependent_zinc_metalloprotease_FtsH_[Bacillus_cereus]   | CPTF_Cd         | 9075668.267 | 293261.1088 | 3.231289424 |
| UIJ66307.1 | ATP-dependent_zinc_metalloprotease_FtsH_[Bacillus_cereus]   | CPTF_Co         | 7812981.5   | 438166.1076 | 5.608180534 |
| UIJ66307.1 | ATP-dependent_zinc_metalloprotease_FtsH_[Bacillus_cereus]   | CPTF_Cu         | 7312826.4   | 304838.2607 | 4.168542285 |
| UIJ66307.1 | ATP-dependent_zinc_metalloprotease_FtsH_[Bacillus_cereus]   | CPTF_Fe         | 8218777.233 | 439498.6193 | 5.347493998 |
| UIJ66307.1 | ATP-dependent_zinc_metalloprotease_FtsH_[Bacillus_cereus]   | CPTF_Mn         | 7916627.367 | 554063.9824 | 6.998737679 |
| UIJ66307.1 | ATP-dependent_zinc_metalloprotease_FtsH_[Bacillus_cereus]   | CPTF_Ni         | 7944416.933 | 521034.7351 | 6.558501895 |
| UIJ66307.1 | ATP-dependent_zinc_metalloprotease_FtsH_[Bacillus_cereus]   | CPTF_U          | 8623286.933 | 759467.5491 | 8.807170107 |
| UIJ66307.1 | ATP-dependent_zinc_metalloprotease_FtsH_[Bacillus_cereus]   | CPTF_metals_mix | 7988001.6   | 667571.234  | 8.357174515 |
| UIJ66307.1 | ATP-dependent_zinc_metalloprotease_FtsH_[Bacillus_cereus]   | CPTF_zcontrol   | 8197784.433 | 103116.7997 | 1.257861811 |
| UIJ66308.1 | hypoxanthine_phosphoribosyltransferase_[Bacillus_cereus]    | CPTF_Al         | 840983.2667 | 162210.8892 | 19.28824218 |

|            |                                                                                                                         |                 |             |             |             |
|------------|-------------------------------------------------------------------------------------------------------------------------|-----------------|-------------|-------------|-------------|
| UIJ66308.1 | hypoxanthine_phosphoribosyltransferase [Bacillus cereus]                                                                | CPTF_Cd         | 1124617.8   | 357824.6467 | 31.81744471 |
| UIJ66308.1 | hypoxanthine_phosphoribosyltransferase [Bacillus cereus]                                                                | CPTF_Co         | 1126911.467 | 121994.2874 | 10.82554318 |
| UIJ66308.1 | hypoxanthine_phosphoribosyltransferase [Bacillus cereus]                                                                | CPTF_Cu         | 1158886.667 | 145303.1369 | 12.53816625 |
| UIJ66308.1 | hypoxanthine_phosphoribosyltransferase [Bacillus cereus]                                                                | CPTF_Fe         | 774138.3333 | 534114.2028 | 68.99467186 |
| UIJ66308.1 | hypoxanthine_phosphoribosyltransferase [Bacillus cereus]                                                                | CPTF_Mn         | 1265249.333 | 846428.0152 | 66.89811983 |
| UIJ66308.1 | hypoxanthine_phosphoribosyltransferase [Bacillus cereus]                                                                | CPTF_Ni         | 706015.6667 | 522852.8375 | 74.0568322  |
| UIJ66308.1 | hypoxanthine_phosphoribosyltransferase [Bacillus cereus]                                                                | CPTF_U          | 534102.5667 | 62551.38801 | 11.71149362 |
| UIJ66308.1 | hypoxanthine_phosphoribosyltransferase [Bacillus cereus]                                                                | CPTF_metals_mix | 5240969.7   | 1059660.924 | 20.21879509 |
| UIJ66308.1 | hypoxanthine_phosphoribosyltransferase [Bacillus cereus]                                                                | CPTF_zcontrol   | 992715      | 247331.0468 | 24.91460759 |
| UIJ66309.1 | tRNA_lysidine(34)_synthetase_TiIS [Bacillus cereus]                                                                     | CPTF_AI         | 241797.6667 | 210101.7122 | 86.89153832 |
| UIJ66309.1 | tRNA_lysidine(34)_synthetase_TiIS [Bacillus cereus]                                                                     | CPTF_Cd         | 418465.3333 | 28482.54687 | 6.806429256 |
| UIJ66309.1 | tRNA_lysidine(34)_synthetase_TiIS [Bacillus cereus]                                                                     | CPTF_Co         | 300533.3333 | 260329.7827 | 86.62259849 |
| UIJ66309.1 | tRNA_lysidine(34)_synthetase_TiIS [Bacillus cereus]                                                                     | CPTF_Cu         | 271378.6667 | 235296.2233 | 86.70402364 |
| UIJ66309.1 | tRNA_lysidine(34)_synthetase_TiIS [Bacillus cereus]                                                                     | CPTF_Fe         | 450218.3333 | 40004.19331 | 8.885509618 |
| UIJ66309.1 | tRNA_lysidine(34)_synthetase_TiIS [Bacillus cereus]                                                                     | CPTF_Mn         | 315880.6667 | 296443.0082 | 93.84651848 |
| UIJ66309.1 | tRNA_lysidine(34)_synthetase_TiIS [Bacillus cereus]                                                                     | CPTF_Ni         | 383315      | 119311.1517 | 31.12613692 |
| UIJ66309.1 | tRNA_lysidine(34)_synthetase_TiIS [Bacillus cereus]                                                                     | CPTF_U          | 308247.3333 | 271344.7418 | 88.0282528  |
| UIJ66309.1 | tRNA_lysidine(34)_synthetase_TiIS [Bacillus cereus]                                                                     | CPTF_metals_mix | 0           | 0           | 0           |
| UIJ66309.1 | tRNA_lysidine(34)_synthetase_TiIS [Bacillus cereus]                                                                     | CPTF_zcontrol   | 365957.3333 | 87052.17995 | 23.78752167 |
| UIJ66311.1 | S1_domain-containing_RNA-binding_protein [Bacillus cereus]                                                              | CPTF_AI         | 284173.6667 | 15359.80359 | 5.405076329 |
| UIJ66311.1 | S1_domain-containing_RNA-binding_protein [Bacillus cereus]                                                              | CPTF_Cd         | 414105      | 36582.43678 | 8.834096855 |
| UIJ66311.1 | S1_domain-containing_RNA-binding_protein [Bacillus cereus]                                                              | CPTF_Co         | 387656      | 54746.80626 | 14.12252261 |
| UIJ66311.1 | S1_domain-containing_RNA-binding_protein [Bacillus cereus]                                                              | CPTF_Cu         | 342384.6667 | 48028.84818 | 14.02774506 |
| UIJ66311.1 | S1_domain-containing_RNA-binding_protein [Bacillus cereus]                                                              | CPTF_Fe         | 383194      | 118482.1445 | 30.91962414 |
| UIJ66311.1 | S1_domain-containing_RNA-binding_protein [Bacillus cereus]                                                              | CPTF_Mn         | 389267      | 80591.27513 | 20.70334118 |
| UIJ66311.1 | S1_domain-containing_RNA-binding_protein [Bacillus cereus]                                                              | CPTF_Ni         | 395971.3333 | 60313.8694  | 15.23187775 |
| UIJ66311.1 | S1_domain-containing_RNA-binding_protein [Bacillus cereus]                                                              | CPTF_U          | 462557.3333 | 51980.50774 | 11.23763564 |
| UIJ66311.1 | S1_domain-containing_RNA-binding_protein [Bacillus cereus]                                                              | CPTF_metals_mix | 1125466     | 49011.91157 | 4.354810503 |
| UIJ66311.1 | S1_domain-containing_RNA-binding_protein [Bacillus cereus]                                                              | CPTF_zcontrol   | 407973.6667 | 78542.63553 | 19.25188853 |
| UIJ66316.1 | nucleoside_triphosphate_pyrophosphohydrolase [Bacillus cereus]                                                          | CPTF_AI         | 90537.66667 | 78705.13666 | 86.93082068 |
| UIJ66316.1 | nucleoside_triphosphate_pyrophosphohydrolase [Bacillus cereus]                                                          | CPTF_Cd         | 128300.6267 | 84956.81797 | 66.21699378 |
| UIJ66316.1 | nucleoside_triphosphate_pyrophosphohydrolase [Bacillus cereus]                                                          | CPTF_Co         | 148126.8333 | 30073.58348 | 20.30258988 |
| UIJ66316.1 | nucleoside_triphosphate_pyrophosphohydrolase [Bacillus cereus]                                                          | CPTF_Cu         | 133319.1    | 6466.686952 | 4.850533008 |
| UIJ66316.1 | nucleoside_triphosphate_pyrophosphohydrolase [Bacillus cereus]                                                          | CPTF_Fe         | 156934.5    | 80396.12579 | 51.22909608 |
| UIJ66316.1 | nucleoside_triphosphate_pyrophosphohydrolase [Bacillus cereus]                                                          | CPTF_Mn         | 39723.66667 | 68803.40893 | 173.2050808 |
| UIJ66316.1 | nucleoside_triphosphate_pyrophosphohydrolase [Bacillus cereus]                                                          | CPTF_Ni         | 84861.9     | 43687.72253 | 51.48096204 |
| UIJ66316.1 | nucleoside_triphosphate_pyrophosphohydrolase [Bacillus cereus]                                                          | CPTF_U          | 98427.66667 | 85879.93642 | 87.25182597 |
| UIJ66316.1 | nucleoside_triphosphate_pyrophosphohydrolase [Bacillus cereus]                                                          | CPTF_metals_mix | 138086.2    | 55392.54632 | 40.11446931 |
| UIJ66316.1 | nucleoside_triphosphate_pyrophosphohydrolase [Bacillus cereus]                                                          | CPTF_zcontrol   | 115504.1667 | 59944.5004  | 51.89812812 |
| UIJ66319.1 | transcription-repair_coupling_factor [Bacillus cereus]                                                                  | CPTF_AI         | 1834092.067 | 296991.6311 | 16.19284203 |
| UIJ66319.1 | transcription-repair_coupling_factor [Bacillus cereus]                                                                  | CPTF_Cd         | 1874258.833 | 155945.3681 | 8.320375252 |
| UIJ66319.1 | transcription-repair_coupling_factor [Bacillus cereus]                                                                  | CPTF_Co         | 1695578.133 | 317311.1489 | 18.71403875 |
| UIJ66319.1 | transcription-repair_coupling_factor [Bacillus cereus]                                                                  | CPTF_Cu         | 1591697.933 | 76834.48174 | 4.827202457 |
| UIJ66319.1 | transcription-repair_coupling_factor [Bacillus cereus]                                                                  | CPTF_Fe         | 1839366.567 | 111147.2369 | 6.042690939 |
| UIJ66319.1 | transcription-repair_coupling_factor [Bacillus cereus]                                                                  | CPTF_Mn         | 1586434     | 299557.2331 | 18.88242644 |
| UIJ66319.1 | transcription-repair_coupling_factor [Bacillus cereus]                                                                  | CPTF_Ni         | 1451370.1   | 121506.1241 | 8.37182219  |
| UIJ66319.1 | transcription-repair_coupling_factor [Bacillus cereus]                                                                  | CPTF_U          | 1542448.233 | 176452.9284 | 11.43979581 |
| UIJ66319.1 | transcription-repair_coupling_factor [Bacillus cereus]                                                                  | CPTF_metals_mix | 1909070.233 | 550487.0816 | 28.8353499  |
| UIJ66319.1 | transcription-repair_coupling_factor [Bacillus cereus]                                                                  | CPTF_zcontrol   | 1694465.7   | 132949.1398 | 7.846080319 |
| UIJ66322.1 | ribose-phosphate_diphosphokinase [Bacillus cereus]                                                                      | CPTF_AI         | 6615252.367 | 344644.561  | 5.209847515 |
| UIJ66322.1 | ribose-phosphate_diphosphokinase [Bacillus cereus]                                                                      | CPTF_Cd         | 6639708.167 | 31347.61067 | 0.472123321 |
| UIJ66322.1 | ribose-phosphate_diphosphokinase [Bacillus cereus]                                                                      | CPTF_Co         | 6715746.133 | 486664.9316 | 7.246624901 |
| UIJ66322.1 | ribose-phosphate_diphosphokinase [Bacillus cereus]                                                                      | CPTF_Cu         | 6603156.8   | 291720.9958 | 4.417901992 |
| UIJ66322.1 | ribose-phosphate_diphosphokinase [Bacillus cereus]                                                                      | CPTF_Fe         | 6767255     | 103297.3661 | 1.526429343 |
| UIJ66322.1 | ribose-phosphate_diphosphokinase [Bacillus cereus]                                                                      | CPTF_Mn         | 6607561.767 | 146726.9465 | 2.220591372 |
| UIJ66322.1 | ribose-phosphate_diphosphokinase [Bacillus cereus]                                                                      | CPTF_Ni         | 7012937.533 | 231618.8036 | 3.302735873 |
| UIJ66322.1 | ribose-phosphate_diphosphokinase [Bacillus cereus]                                                                      | CPTF_U          | 7621899.667 | 287546.9724 | 3.772641795 |
| UIJ66322.1 | ribose-phosphate_diphosphokinase [Bacillus cereus]                                                                      | CPTF_metals_mix | 7481221.353 | 629244.9318 | 8.410992031 |
| UIJ66322.1 | ribose-phosphate_diphosphokinase [Bacillus cereus]                                                                      | CPTF_zcontrol   | 7294535.667 | 197404.3558 | 2.70619495  |
| UIJ66323.1 | bifunctional_UDP-N-acetylglucosamine_diphosphorylase/glucosamine-1-phosphate_N-acetyltransferase_GlmU [Bacillus cereus] | CPTF_AI         | 71052.96667 | 2694.142465 | 3.79173818  |
| UIJ66323.1 | bifunctional_UDP-N-acetylglucosamine_diphosphorylase/glucosamine-1-phosphate_N-acetyltransferase_GlmU [Bacillus cereus] | CPTF_Cd         | 32220.7     | 5889.097089 | 18.27737165 |

|            |                                                                                                                         |                 |             |             |             |
|------------|-------------------------------------------------------------------------------------------------------------------------|-----------------|-------------|-------------|-------------|
| UIJ66323.1 | bifunctional_UDP-N-acetylglucosamine_diphosphorylase/glucosamine-1-phosphate_N-acetyltransferase_GlmU_[Bacillus_cereus] | CPTF_Co         | 63710.7     | 39533.25887 | 62.05120784 |
| UIJ66323.1 | bifunctional_UDP-N-acetylglucosamine_diphosphorylase/glucosamine-1-phosphate_N-acetyltransferase_GlmU_[Bacillus_cereus] | CPTF_Cu         | 13572.4     | 12924.83584 | 95.2288161  |
| UIJ66323.1 | bifunctional_UDP-N-acetylglucosamine_diphosphorylase/glucosamine-1-phosphate_N-acetyltransferase_GlmU_[Bacillus_cereus] | CPTF_Fe         | 66014.23333 | 35691.14069 | 54.06582625 |
| UIJ66323.1 | bifunctional_UDP-N-acetylglucosamine_diphosphorylase/glucosamine-1-phosphate_N-acetyltransferase_GlmU_[Bacillus_cereus] | CPTF_Mn         | 39173.36667 | 45473.82317 | 116.0835206 |
| UIJ66323.1 | bifunctional_UDP-N-acetylglucosamine_diphosphorylase/glucosamine-1-phosphate_N-acetyltransferase_GlmU_[Bacillus_cereus] | CPTF_Ni         | 54659.26667 | 29849.33374 | 54.60983207 |
| UIJ66323.1 | bifunctional_UDP-N-acetylglucosamine_diphosphorylase/glucosamine-1-phosphate_N-acetyltransferase_GlmU_[Bacillus_cereus] | CPTF_U          | 0           | 0           | 0           |
| UIJ66323.1 | bifunctional_UDP-N-acetylglucosamine_diphosphorylase/glucosamine-1-phosphate_N-acetyltransferase_GlmU_[Bacillus_cereus] | CPTF_metals_mix | 38439.03333 | 7769.790737 | 20.21328338 |
| UIJ66323.1 | bifunctional_UDP-N-acetylglucosamine_diphosphorylase/glucosamine-1-phosphate_N-acetyltransferase_GlmU_[Bacillus_cereus] | CPTF_zcontrol   | 23856.46667 | 41320.61236 | 173.2050808 |
| UIJ66325.1 | pur_operon_repressor_[Bacillus_cereus]                                                                                  | CPTF_Al         | 1121699.267 | 142365.7118 | 12.69196799 |
| UIJ66325.1 | pur_operon_repressor_[Bacillus_cereus]                                                                                  | CPTF_Cd         | 1107250.667 | 48189.173   | 4.352146668 |
| UIJ66325.1 | pur_operon_repressor_[Bacillus_cereus]                                                                                  | CPTF_Co         | 1008675.633 | 7628.799468 | 0.756318406 |
| UIJ66325.1 | pur_operon_repressor_[Bacillus_cereus]                                                                                  | CPTF_Cu         | 998057.5    | 118211.741  | 11.84418143 |
| UIJ66325.1 | pur_operon_repressor_[Bacillus_cereus]                                                                                  | CPTF_Fe         | 1209790.067 | 31447.25815 | 2.599397946 |
| UIJ66325.1 | pur_operon_repressor_[Bacillus_cereus]                                                                                  | CPTF_Mn         | 997040.8667 | 139813.815  | 14.02287706 |
| UIJ66325.1 | pur_operon_repressor_[Bacillus_cereus]                                                                                  | CPTF_Ni         | 932294.9667 | 40088.92721 | 4.300026134 |
| UIJ66325.1 | pur_operon_repressor_[Bacillus_cereus]                                                                                  | CPTF_U          | 943608.1    | 272667.4387 | 28.89625881 |
| UIJ66325.1 | pur_operon_repressor_[Bacillus_cereus]                                                                                  | CPTF_metals_mix | 862500.8    | 71616.87318 | 8.303397884 |
| UIJ66325.1 | pur_operon_repressor_[Bacillus_cereus]                                                                                  | CPTF_zcontrol   | 1162400.667 | 54215.29543 | 4.664079864 |
| UIJ66329.1 | 16S_rRNA_(adenine(1518)-N(6)/adenine(1519)-N(6))-dimethyltransferase_RsmA_[Bacillus_cereus]                             | CPTF_Al         | 258777      | 21378.97558 | 8.261543948 |
| UIJ66329.1 | 16S_rRNA_(adenine(1518)-N(6)/adenine(1519)-N(6))-dimethyltransferase_RsmA_[Bacillus_cereus]                             | CPTF_Cd         | 205779.3333 | 178241.2768 | 86.61767627 |
| UIJ66329.1 | 16S_rRNA_(adenine(1518)-N(6)/adenine(1519)-N(6))-dimethyltransferase_RsmA_[Bacillus_cereus]                             | CPTF_Co         | 241005      | 72874.53434 | 30.23776865 |
| UIJ66329.1 | 16S_rRNA_(adenine(1518)-N(6)/adenine(1519)-N(6))-dimethyltransferase_RsmA_[Bacillus_cereus]                             | CPTF_Cu         | 266804.6667 | 40761.115   | 15.27751201 |
| UIJ66329.1 | 16S_rRNA_(adenine(1518)-N(6)/adenine(1519)-N(6))-dimethyltransferase_RsmA_[Bacillus_cereus]                             | CPTF_Fe         | 200809.6667 | 173978.2362 | 86.63837709 |
| UIJ66329.1 | 16S_rRNA_(adenine(1518)-N(6)/adenine(1519)-N(6))-dimethyltransferase_RsmA_[Bacillus_cereus]                             | CPTF_Mn         | 90628       | 83991.45345 | 92.67715656 |
| UIJ66329.1 | 16S_rRNA_(adenine(1518)-N(6)/adenine(1519)-N(6))-dimethyltransferase_RsmA_[Bacillus_cereus]                             | CPTF_Ni         | 83562.33333 | 144734.2069 | 173.2050808 |
| UIJ66329.1 | 16S_rRNA_(adenine(1518)-N(6)/adenine(1519)-N(6))-dimethyltransferase_RsmA_[Bacillus_cereus]                             | CPTF_U          | 64276       | 111329.2977 | 173.2050808 |
| UIJ66329.1 | 16S_rRNA_(adenine(1518)-N(6)/adenine(1519)-N(6))-dimethyltransferase_RsmA_[Bacillus_cereus]                             | CPTF_metals_mix | 264180.3333 | 38876.75676 | 14.71599202 |
| UIJ66329.1 | 16S_rRNA_(adenine(1518)-N(6)/adenine(1519)-N(6))-dimethyltransferase_RsmA_[Bacillus_cereus]                             | CPTF_zcontrol   | 159430.6667 | 23992.62364 | 15.04893892 |
| UIJ66330.1 | ribonuclease_M5_[Bacillus_cereus]                                                                                       | CPTF_Al         | 0           | 0           | 0           |
| UIJ66330.1 | ribonuclease_M5_[Bacillus_cereus]                                                                                       | CPTF_Cd         | 0           | 0           | 0           |
| UIJ66330.1 | ribonuclease_M5_[Bacillus_cereus]                                                                                       | CPTF_Co         | 76391.33333 | 66483.84956 | 87.03061808 |
| UIJ66330.1 | ribonuclease_M5_[Bacillus_cereus]                                                                                       | CPTF_Cu         | 0           | 0           | 0           |
| UIJ66330.1 | ribonuclease_M5_[Bacillus_cereus]                                                                                       | CPTF_Fe         | 82573       | 74620.11159 | 90.36865753 |
| UIJ66330.1 | ribonuclease_M5_[Bacillus_cereus]                                                                                       | CPTF_Mn         | 0           | 0           | 0           |
| UIJ66330.1 | ribonuclease_M5_[Bacillus_cereus]                                                                                       | CPTF_Ni         | 0           | 0           | 0           |
| UIJ66330.1 | ribonuclease_M5_[Bacillus_cereus]                                                                                       | CPTF_U          | 16360.23333 | 28336.75536 | 173.2050808 |
| UIJ66330.1 | ribonuclease_M5_[Bacillus_cereus]                                                                                       | CPTF_metals_mix | 20168.76667 | 34933.32859 | 173.2050808 |
| UIJ66330.1 | ribonuclease_M5_[Bacillus_cereus]                                                                                       | CPTF_zcontrol   | 47170.36667 | 41972.69825 | 88.98107269 |
| UIJ66332.1 | methionine--tRNA_ligase_[Bacillus_cereus]                                                                               | CPTF_Al         | 7851367.933 | 699116.3995 | 8.904389725 |
| UIJ66332.1 | methionine--tRNA_ligase_[Bacillus_cereus]                                                                               | CPTF_Cd         | 8367586.133 | 687434.3743 | 8.215444255 |
| UIJ66332.1 | methionine--tRNA_ligase_[Bacillus_cereus]                                                                               | CPTF_Co         | 7415239.667 | 307962.0288 | 4.153096092 |
| UIJ66332.1 | methionine--tRNA_ligase_[Bacillus_cereus]                                                                               | CPTF_Cu         | 7440875.5   | 726099.9561 | 9.758259712 |
| UIJ66332.1 | methionine--tRNA_ligase_[Bacillus_cereus]                                                                               | CPTF_Fe         | 7631062.7   | 498072.3599 | 6.526906927 |
| UIJ66332.1 | methionine--tRNA_ligase_[Bacillus_cereus]                                                                               | CPTF_Mn         | 7871774.333 | 198254.8368 | 2.518553358 |
| UIJ66332.1 | methionine--tRNA_ligase_[Bacillus_cereus]                                                                               | CPTF_Ni         | 7614233.967 | 398146.7914 | 5.228980265 |
| UIJ66332.1 | methionine--tRNA_ligase_[Bacillus_cereus]                                                                               | CPTF_U          | 8072055.3   | 812762.7097 | 10.06884467 |
| UIJ66332.1 | methionine--tRNA_ligase_[Bacillus_cereus]                                                                               | CPTF_metals_mix | 8795839.7   | 522105.6128 | 5.935824556 |
| UIJ66332.1 | methionine--tRNA_ligase_[Bacillus_cereus]                                                                               | CPTF_zcontrol   | 7857608.367 | 683488.4469 | 8.698428517 |
| UIJ66333.1 | AbrB/MazE/SpoVT_family_DNA-binding_domain-containing_protein_[Bacillus_cereus]                                          | CPTF_Al         | 2821114.667 | 316973.4593 | 11.23575242 |
| UIJ66333.1 | AbrB/MazE/SpoVT_family_DNA-binding_domain-containing_protein_[Bacillus_cereus]                                          | CPTF_Cd         | 3366685.667 | 294128.7599 | 8.736448515 |
| UIJ66333.1 | AbrB/MazE/SpoVT_family_DNA-binding_domain-containing_protein_[Bacillus_cereus]                                          | CPTF_Co         | 3271199.667 | 404708.3501 | 12.37186327 |
| UIJ66333.1 | AbrB/MazE/SpoVT_family_DNA-binding_domain-containing_protein_[Bacillus_cereus]                                          | CPTF_Cu         | 3055219.533 | 37878.28019 | 1.239789147 |
| UIJ66333.1 | AbrB/MazE/SpoVT_family_DNA-binding_domain-containing_protein_[Bacillus_cereus]                                          | CPTF_Fe         | 2943365     | 307215.8456 | 10.43757215 |
| UIJ66333.1 | AbrB/MazE/SpoVT_family_DNA-binding_domain-containing_protein_[Bacillus_cereus]                                          | CPTF_Mn         | 3729900.467 | 1644200.155 | 44.08160942 |
| UIJ66333.1 | AbrB/MazE/SpoVT_family_DNA-binding_domain-containing_protein_[Bacillus_cereus]                                          | CPTF_Ni         | 2860892.233 | 59472.38883 | 2.07880563  |
| UIJ66333.1 | AbrB/MazE/SpoVT_family_DNA-binding_domain-containing_protein_[Bacillus_cereus]                                          | CPTF_U          | 2827873.633 | 524393.4354 | 18.54373651 |
| UIJ66333.1 | AbrB/MazE/SpoVT_family_DNA-binding_domain-containing_protein_[Bacillus_cereus]                                          | CPTF_metals_mix | 8843962     | 693591.8779 | 6.937975061 |
| UIJ66333.1 | AbrB/MazE/SpoVT_family_DNA-binding_domain-containing_protein_[Bacillus_cereus]                                          | CPTF_zcontrol   | 2993217.833 | 244276.788  | 8.161009375 |
| UIJ66334.1 | 16S_rRNA_(cytidine(1402)-2'-O)-methyltransferase_[Bacillus_cereus]                                                      | CPTF_Al         | 0           | 0           | 0           |
| UIJ66334.1 | 16S_rRNA_(cytidine(1402)-2'-O)-methyltransferase_[Bacillus_cereus]                                                      | CPTF_Cd         | 0           | 0           | 0           |
| UIJ66334.1 | 16S_rRNA_(cytidine(1402)-2'-O)-methyltransferase_[Bacillus_cereus]                                                      | CPTF_Co         | 0           | 0           | 0           |



|            |                                                                            |                 |             |             |             |
|------------|----------------------------------------------------------------------------|-----------------|-------------|-------------|-------------|
| UIJ66334.1 | 16S_rRNA_(cytidine(1402)-2'-O)-methyltransferase_[Bacillus_cereus]         | CPTF_Cu         | 0           | 0           | 0           |
| UIJ66334.1 | 16S_rRNA_(cytidine(1402)-2'-O)-methyltransferase_[Bacillus_cereus]         | CPTF_Fe         | 0           | 0           | 0           |
| UIJ66334.1 | 16S_rRNA_(cytidine(1402)-2'-O)-methyltransferase_[Bacillus_cereus]         | CPTF_Mn         | 0           | 0           | 0           |
| UIJ66334.1 | 16S_rRNA_(cytidine(1402)-2'-O)-methyltransferase_[Bacillus_cereus]         | CPTF_Ni         | 0           | 0           | 0           |
| UIJ66334.1 | 16S_rRNA_(cytidine(1402)-2'-O)-methyltransferase_[Bacillus_cereus]         | CPTF_U          | 11438.7     | 19812.40957 | 173.2050808 |
| UIJ66334.1 | 16S_rRNA_(cytidine(1402)-2'-O)-methyltransferase_[Bacillus_cereus]         | CPTF_metals_mix | 157241.6667 | 10249.402   | 6.518248131 |
| UIJ66334.1 | 16S_rRNA_(cytidine(1402)-2'-O)-methyltransferase_[Bacillus_cereus]         | CPTF_zcontrol   | 0           | 0           | 0           |
| UIJ66337.1 | DNA_replication_initiation_control_protein_YabA_[Bacillus_cereus]          | CPTF_Al         | 37476.66667 | 64911.49076 | 173.2050808 |
| UIJ66337.1 | DNA_replication_initiation_control_protein_YabA_[Bacillus_cereus]          | CPTF_Cd         | 71625.33333 | 124058.7164 | 173.2050808 |
| UIJ66337.1 | DNA_replication_initiation_control_protein_YabA_[Bacillus_cereus]          | CPTF_Co         | 52879       | 91589.11465 | 173.2050808 |
| UIJ66337.1 | DNA_replication_initiation_control_protein_YabA_[Bacillus_cereus]          | CPTF_Cu         | 81754.66667 | 72983.20808 | 89.27099952 |
| UIJ66337.1 | DNA_replication_initiation_control_protein_YabA_[Bacillus_cereus]          | CPTF_Fe         | 114469      | 102787.5188 | 89.79507015 |
| UIJ66337.1 | DNA_replication_initiation_control_protein_YabA_[Bacillus_cereus]          | CPTF_Mn         | 0           | 0           | 0           |
| UIJ66337.1 | DNA_replication_initiation_control_protein_YabA_[Bacillus_cereus]          | CPTF_Ni         | 47854.33333 | 82886.1367  | 173.2050808 |
| UIJ66337.1 | DNA_replication_initiation_control_protein_YabA_[Bacillus_cereus]          | CPTF_U          | 0           | 0           | 0           |
| UIJ66337.1 | DNA_replication_initiation_control_protein_YabA_[Bacillus_cereus]          | CPTF_metals_mix | 96332.63333 | 143759.9533 | 149.2328698 |
| UIJ66337.1 | DNA_replication_initiation_control_protein_YabA_[Bacillus_cereus]          | CPTF_zcontrol   | 0           | 0           | 0           |
| UIJ66338.1 | stage_0_sporulation_family_protein_[Bacillus_cereus]                       | CPTF_Al         | 185652.3333 | 141090.0481 | 75.99691615 |
| UIJ66338.1 | stage_0_sporulation_family_protein_[Bacillus_cereus]                       | CPTF_Cd         | 31533.43333 | 54617.50867 | 173.2050808 |
| UIJ66338.1 | stage_0_sporulation_family_protein_[Bacillus_cereus]                       | CPTF_Co         | 301725.2667 | 109627.5711 | 36.33357337 |
| UIJ66338.1 | stage_0_sporulation_family_protein_[Bacillus_cereus]                       | CPTF_Cu         | 166048.6    | 228008.9174 | 137.3145678 |
| UIJ66338.1 | stage_0_sporulation_family_protein_[Bacillus_cereus]                       | CPTF_Fe         | 53071       | 91921.66841 | 173.2050808 |
| UIJ66338.1 | stage_0_sporulation_family_protein_[Bacillus_cereus]                       | CPTF_Mn         | 215209.4    | 231962.3155 | 107.784472  |
| UIJ66338.1 | stage_0_sporulation_family_protein_[Bacillus_cereus]                       | CPTF_Ni         | 218132.7333 | 197996.9704 | 90.76903193 |
| UIJ66338.1 | stage_0_sporulation_family_protein_[Bacillus_cereus]                       | CPTF_U          | 283881.4333 | 185887.6082 | 65.48072058 |
| UIJ66338.1 | stage_0_sporulation_family_protein_[Bacillus_cereus]                       | CPTF_metals_mix | 282512.3667 | 61407.35719 | 21.73616607 |
| UIJ66338.1 | stage_0_sporulation_family_protein_[Bacillus_cereus]                       | CPTF_zcontrol   | 306654.5333 | 117269.3936 | 38.24153268 |
| UIJ66340.1 | dTMP_kinase_[Bacillus_cereus]                                              | CPTF_Al         | 237127.3333 | 147506.7101 | 62.20569683 |
| UIJ66340.1 | dTMP_kinase_[Bacillus_cereus]                                              | CPTF_Cd         | 242198.3333 | 62525.58174 | 25.81585962 |
| UIJ66340.1 | dTMP_kinase_[Bacillus_cereus]                                              | CPTF_Co         | 243372.0333 | 83259.65999 | 34.21085769 |
| UIJ66340.1 | dTMP_kinase_[Bacillus_cereus]                                              | CPTF_Cu         | 290581.3333 | 115787.9718 | 39.84700959 |
| UIJ66340.1 | dTMP_kinase_[Bacillus_cereus]                                              | CPTF_Fe         | 165489.2    | 75210.67814 | 45.44748427 |
| UIJ66340.1 | dTMP_kinase_[Bacillus_cereus]                                              | CPTF_Mn         | 188501.6667 | 107985.4185 | 57.28618764 |
| UIJ66340.1 | dTMP_kinase_[Bacillus_cereus]                                              | CPTF_Ni         | 227680.6667 | 131621.7267 | 57.80979501 |
| UIJ66340.1 | dTMP_kinase_[Bacillus_cereus]                                              | CPTF_U          | 105311      | 93849.33065 | 89.11636073 |
| UIJ66340.1 | dTMP_kinase_[Bacillus_cereus]                                              | CPTF_metals_mix | 201921.9    | 28362.64393 | 14.04634363 |
| UIJ66340.1 | dTMP_kinase_[Bacillus_cereus]                                              | CPTF_zcontrol   | 150483.3333 | 21939.79271 | 14.57954993 |
| UIJ66351.1 | DUF3797_domain-containing_protein_[Bacillus_cereus]                        | CPTF_Al         | 105066.9667 | 14971.80688 | 14.24977551 |
| UIJ66351.1 | DUF3797_domain-containing_protein_[Bacillus_cereus]                        | CPTF_Cd         | 115967.9    | 39084.80628 | 33.70312499 |
| UIJ66351.1 | DUF3797_domain-containing_protein_[Bacillus_cereus]                        | CPTF_Co         | 120480.3333 | 3969.288391 | 3.294552963 |
| UIJ66351.1 | DUF3797_domain-containing_protein_[Bacillus_cereus]                        | CPTF_Cu         | 66361.26667 | 16793.23807 | 25.30578289 |
| UIJ66351.1 | DUF3797_domain-containing_protein_[Bacillus_cereus]                        | CPTF_Fe         | 65052.6     | 18488.94949 | 28.4215381  |
| UIJ66351.1 | DUF3797_domain-containing_protein_[Bacillus_cereus]                        | CPTF_Mn         | 136199.8    | 160593.7638 | 117.9104256 |
| UIJ66351.1 | DUF3797_domain-containing_protein_[Bacillus_cereus]                        | CPTF_Ni         | 83993.36667 | 51760.29453 | 61.62426461 |
| UIJ66351.1 | DUF3797_domain-containing_protein_[Bacillus_cereus]                        | CPTF_U          | 12056.33333 | 20882.18189 | 173.2050808 |
| UIJ66351.1 | DUF3797_domain-containing_protein_[Bacillus_cereus]                        | CPTF_metals_mix | 423839.3333 | 60659.16068 | 14.31182901 |
| UIJ66351.1 | DUF3797_domain-containing_protein_[Bacillus_cereus]                        | CPTF_zcontrol   | 53272.06667 | 15557.63306 | 29.20411021 |
| UIJ66352.1 | serine--tRNA_ligase_[Bacillus_cereus]                                      | CPTF_Al         | 4219652.367 | 591502.5182 | 14.0178021  |
| UIJ66352.1 | serine--tRNA_ligase_[Bacillus_cereus]                                      | CPTF_Cd         | 5311541.567 | 627100.7794 | 11.80637996 |
| UIJ66352.1 | serine--tRNA_ligase_[Bacillus_cereus]                                      | CPTF_Co         | 3971320.367 | 840648.2536 | 21.16797881 |
| UIJ66352.1 | serine--tRNA_ligase_[Bacillus_cereus]                                      | CPTF_Cu         | 2665341     | 527344.1977 | 19.78524315 |
| UIJ66352.1 | serine--tRNA_ligase_[Bacillus_cereus]                                      | CPTF_Fe         | 3489213.133 | 497171.638  | 14.24881826 |
| UIJ66352.1 | serine--tRNA_ligase_[Bacillus_cereus]                                      | CPTF_Mn         | 4844812.967 | 2954219.832 | 60.97696344 |
| UIJ66352.1 | serine--tRNA_ligase_[Bacillus_cereus]                                      | CPTF_Ni         | 2511244.867 | 446221.1866 | 17.76892379 |
| UIJ66352.1 | serine--tRNA_ligase_[Bacillus_cereus]                                      | CPTF_U          | 3495772     | 934703.9156 | 26.73812582 |
| UIJ66352.1 | serine--tRNA_ligase_[Bacillus_cereus]                                      | CPTF_metals_mix | 7320036.967 | 560392.8825 | 7.65560181  |
| UIJ66352.1 | serine--tRNA_ligase_[Bacillus_cereus]                                      | CPTF_zcontrol   | 3629440.567 | 1107262.573 | 30.50780286 |
| UIJ66353.1 | pyridoxal_5'-phosphate_synthase_glutaminase_subunit_PdxT_[Bacillus_cereus] | CPTF_Al         | 1325418.667 | 96571.38027 | 7.286103832 |
| UIJ66353.1 | pyridoxal_5'-phosphate_synthase_glutaminase_subunit_PdxT_[Bacillus_cereus] | CPTF_Cd         | 1294807.267 | 136987.067  | 10.57972646 |
| UIJ66353.1 | pyridoxal_5'-phosphate_synthase_glutaminase_subunit_PdxT_[Bacillus_cereus] | CPTF_Co         | 1291589.333 | 128864.8128 | 9.977228017 |
| UIJ66353.1 | pyridoxal_5'-phosphate_synthase_glutaminase_subunit_PdxT_[Bacillus_cereus] | CPTF_Cu         | 1149460.667 | 142763.8859 | 12.42007578 |

|            |                                                                            |                 |             |             |             |
|------------|----------------------------------------------------------------------------|-----------------|-------------|-------------|-------------|
| UIJ66353.1 | pyridoxal_5'-phosphate_synthase_glutaminase_subunit_PdxT_[Bacillus_cereus] | CPTF_Fe         | 1226164.667 | 27829.09    | 2.269604626 |
| UIJ66353.1 | pyridoxal_5'-phosphate_synthase_glutaminase_subunit_PdxT_[Bacillus_cereus] | CPTF_Mn         | 1274853     | 73079.75235 | 5.732406195 |
| UIJ66353.1 | pyridoxal_5'-phosphate_synthase_glutaminase_subunit_PdxT_[Bacillus_cereus] | CPTF_Ni         | 1036100.333 | 57798.35718 | 5.57845175  |
| UIJ66353.1 | pyridoxal_5'-phosphate_synthase_glutaminase_subunit_PdxT_[Bacillus_cereus] | CPTF_U          | 1350298.333 | 204951.3452 | 15.17822692 |
| UIJ66353.1 | pyridoxal_5'-phosphate_synthase_glutaminase_subunit_PdxT_[Bacillus_cereus] | CPTF_metals_mix | 1589409     | 121413.8943 | 7.638933359 |
| UIJ66353.1 | pyridoxal_5'-phosphate_synthase_glutaminase_subunit_PdxT_[Bacillus_cereus] | CPTF_zcontrol   | 1309795     | 100297.0181 | 7.657459231 |
| UIJ66354.1 | pyridoxal_5'-phosphate_synthase_lyase_subunit_PdxS_[Bacillus_cereus]       | CPTF_AI         | 8848102.233 | 227206.4672 | 2.567855357 |
| UIJ66354.1 | pyridoxal_5'-phosphate_synthase_lyase_subunit_PdxS_[Bacillus_cereus]       | CPTF_Cd         | 9386300.033 | 289671.834  | 3.086113109 |
| UIJ66354.1 | pyridoxal_5'-phosphate_synthase_lyase_subunit_PdxS_[Bacillus_cereus]       | CPTF_Co         | 9717228     | 382551.0615 | 3.936833235 |
| UIJ66354.1 | pyridoxal_5'-phosphate_synthase_lyase_subunit_PdxS_[Bacillus_cereus]       | CPTF_Cu         | 8353839.433 | 798266.7175 | 9.555686627 |
| UIJ66354.1 | pyridoxal_5'-phosphate_synthase_lyase_subunit_PdxS_[Bacillus_cereus]       | CPTF_Fe         | 8888696.167 | 1113758.998 | 12.53006039 |
| UIJ66354.1 | pyridoxal_5'-phosphate_synthase_lyase_subunit_PdxS_[Bacillus_cereus]       | CPTF_Mn         | 9262090     | 2065032.876 | 22.29553887 |
| UIJ66354.1 | pyridoxal_5'-phosphate_synthase_lyase_subunit_PdxS_[Bacillus_cereus]       | CPTF_Ni         | 8003792.367 | 1034503.074 | 12.92516131 |
| UIJ66354.1 | pyridoxal_5'-phosphate_synthase_lyase_subunit_PdxS_[Bacillus_cereus]       | CPTF_U          | 7009757.667 | 631693.1531 | 9.011626124 |
| UIJ66354.1 | pyridoxal_5'-phosphate_synthase_lyase_subunit_PdxS_[Bacillus_cereus]       | CPTF_metals_mix | 8589581.36  | 648634.5163 | 7.551410123 |
| UIJ66354.1 | pyridoxal_5'-phosphate_synthase_lyase_subunit_PdxS_[Bacillus_cereus]       | CPTF_zcontrol   | 9462863     | 1261796.16  | 13.33419029 |
| UIJ66355.1 | IMP_dehydrogenase_[Bacillus_cereus]                                        | CPTF_AI         | 16332722.1  | 728837.3616 | 4.462436556 |
| UIJ66355.1 | IMP_dehydrogenase_[Bacillus_cereus]                                        | CPTF_Cd         | 17200020.47 | 863341.8563 | 5.019423424 |
| UIJ66355.1 | IMP_dehydrogenase_[Bacillus_cereus]                                        | CPTF_Co         | 18556296.83 | 2822766.687 | 15.21190738 |
| UIJ66355.1 | IMP_dehydrogenase_[Bacillus_cereus]                                        | CPTF_Cu         | 20280221.8  | 334123.1039 | 1.647531803 |
| UIJ66355.1 | IMP_dehydrogenase_[Bacillus_cereus]                                        | CPTF_Fe         | 17750705.53 | 786367.6897 | 4.430064417 |
| UIJ66355.1 | IMP_dehydrogenase_[Bacillus_cereus]                                        | CPTF_Mn         | 16452828.2  | 1986610.874 | 12.0745859  |
| UIJ66355.1 | IMP_dehydrogenase_[Bacillus_cereus]                                        | CPTF_Ni         | 17098306.4  | 802778.9991 | 4.695079035 |
| UIJ66355.1 | IMP_dehydrogenase_[Bacillus_cereus]                                        | CPTF_U          | 13889937.9  | 1400446.773 | 10.08245525 |
| UIJ66355.1 | IMP_dehydrogenase_[Bacillus_cereus]                                        | CPTF_metals_mix | 25520618.93 | 1306271.289 | 5.118493764 |
| UIJ66355.1 | IMP_dehydrogenase_[Bacillus_cereus]                                        | CPTF_zcontrol   | 15198650.07 | 699028.8509 | 4.599282488 |
| UIJ66357.1 | DNA_gyrase_subunit_A_[Bacillus_cereus]                                     | CPTF_AI         | 2182166.967 | 164722.7886 | 7.548587761 |
| UIJ66357.1 | DNA_gyrase_subunit_A_[Bacillus_cereus]                                     | CPTF_Cd         | 2094151.833 | 142763.904  | 6.817266147 |
| UIJ66357.1 | DNA_gyrase_subunit_A_[Bacillus_cereus]                                     | CPTF_Co         | 2195111.167 | 288866.67   | 13.15954629 |
| UIJ66357.1 | DNA_gyrase_subunit_A_[Bacillus_cereus]                                     | CPTF_Cu         | 2347751.667 | 412198.2779 | 17.55714984 |
| UIJ66357.1 | DNA_gyrase_subunit_A_[Bacillus_cereus]                                     | CPTF_Fe         | 2327594.667 | 21162.95745 | 0.909220053 |
| UIJ66357.1 | DNA_gyrase_subunit_A_[Bacillus_cereus]                                     | CPTF_Mn         | 2164834.867 | 181817.734  | 8.398688361 |
| UIJ66357.1 | DNA_gyrase_subunit_A_[Bacillus_cereus]                                     | CPTF_Ni         | 2205093.333 | 81140.07642 | 3.679666307 |
| UIJ66357.1 | DNA_gyrase_subunit_A_[Bacillus_cereus]                                     | CPTF_U          | 2125611.633 | 356614.4107 | 16.77702573 |
| UIJ66357.1 | DNA_gyrase_subunit_A_[Bacillus_cereus]                                     | CPTF_metals_mix | 2210630.333 | 93182.08353 | 4.215181622 |
| UIJ66357.1 | DNA_gyrase_subunit_A_[Bacillus_cereus]                                     | CPTF_zcontrol   | 2015719.133 | 126395.6665 | 6.27049991  |
| UIJ66358.1 | DNA_topoisomerase_(ATP-hydrolyzing)_subunit_B_[Bacillus_cereus]            | CPTF_AI         | 2912257.3   | 272240.7087 | 9.348099451 |
| UIJ66358.1 | DNA_topoisomerase_(ATP-hydrolyzing)_subunit_B_[Bacillus_cereus]            | CPTF_Cd         | 3266374.567 | 748534.7055 | 22.91637687 |
| UIJ66358.1 | DNA_topoisomerase_(ATP-hydrolyzing)_subunit_B_[Bacillus_cereus]            | CPTF_Co         | 2245246.833 | 701948.5206 | 31.26375729 |
| UIJ66358.1 | DNA_topoisomerase_(ATP-hydrolyzing)_subunit_B_[Bacillus_cereus]            | CPTF_Cu         | 2820066.5   | 546528.5109 | 19.37998664 |
| UIJ66358.1 | DNA_topoisomerase_(ATP-hydrolyzing)_subunit_B_[Bacillus_cereus]            | CPTF_Fe         | 2777623.333 | 135833.0704 | 4.890262434 |
| UIJ66358.1 | DNA_topoisomerase_(ATP-hydrolyzing)_subunit_B_[Bacillus_cereus]            | CPTF_Mn         | 3006065.767 | 760770.7034 | 25.30785294 |
| UIJ66358.1 | DNA_topoisomerase_(ATP-hydrolyzing)_subunit_B_[Bacillus_cereus]            | CPTF_Ni         | 1880596.8   | 578650.1637 | 30.76949635 |
| UIJ66358.1 | DNA_topoisomerase_(ATP-hydrolyzing)_subunit_B_[Bacillus_cereus]            | CPTF_U          | 2533572.733 | 284877.2037 | 11.24409021 |
| UIJ66358.1 | DNA_topoisomerase_(ATP-hydrolyzing)_subunit_B_[Bacillus_cereus]            | CPTF_metals_mix | 4813635.667 | 290741.2944 | 6.039952222 |
| UIJ66358.1 | DNA_topoisomerase_(ATP-hydrolyzing)_subunit_B_[Bacillus_cereus]            | CPTF_zcontrol   | 2639145.4   | 474339.7967 | 17.97323469 |
| UIJ66361.1 | DNA_polymerase_III_subunit_beta_[Bacillus_cereus]                          | CPTF_AI         | 621255      | 25806.62882 | 4.152146546 |
| UIJ66361.1 | DNA_polymerase_III_subunit_beta_[Bacillus_cereus]                          | CPTF_Cd         | 578768      | 26741.31199 | 4.620385369 |
| UIJ66361.1 | DNA_polymerase_III_subunit_beta_[Bacillus_cereus]                          | CPTF_Co         | 605212      | 74327.3773  | 12.28121341 |
| UIJ66361.1 | DNA_polymerase_III_subunit_beta_[Bacillus_cereus]                          | CPTF_Cu         | 556536.6667 | 36037.69563 | 6.475349746 |
| UIJ66361.1 | DNA_polymerase_III_subunit_beta_[Bacillus_cereus]                          | CPTF_Fe         | 736198      | 195685.7709 | 26.58058985 |
| UIJ66361.1 | DNA_polymerase_III_subunit_beta_[Bacillus_cereus]                          | CPTF_Mn         | 684817.3333 | 62052.61126 | 9.061191684 |
| UIJ66361.1 | DNA_polymerase_III_subunit_beta_[Bacillus_cereus]                          | CPTF_Ni         | 603527      | 61247.63617 | 10.14828436 |
| UIJ66361.1 | DNA_polymerase_III_subunit_beta_[Bacillus_cereus]                          | CPTF_U          | 675167.3333 | 124141.6608 | 18.38679905 |
| UIJ66361.1 | DNA_polymerase_III_subunit_beta_[Bacillus_cereus]                          | CPTF_metals_mix | 597009.8    | 58397.80073 | 9.781715598 |
| UIJ66361.1 | DNA_polymerase_III_subunit_beta_[Bacillus_cereus]                          | CPTF_zcontrol   | 656550.3333 | 60757.31203 | 9.254021961 |
| UIJ66362.1 | chromosomal_replication_initiator_protein_DnaA_[Bacillus_cereus]           | CPTF_AI         | 883243.4333 | 723916.1554 | 81.96111379 |
| UIJ66362.1 | chromosomal_replication_initiator_protein_DnaA_[Bacillus_cereus]           | CPTF_Cd         | 1072238.2   | 520417.006  | 48.53557783 |
| UIJ66362.1 | chromosomal_replication_initiator_protein_DnaA_[Bacillus_cereus]           | CPTF_Co         | 645777.3333 | 238821.8176 | 36.98206879 |
| UIJ66362.1 | chromosomal_replication_initiator_protein_DnaA_[Bacillus_cereus]           | CPTF_Cu         | 638724.6667 | 194881.4795 | 30.51103075 |
| UIJ66362.1 | chromosomal_replication_initiator_protein_DnaA_[Bacillus_cereus]           | CPTF_Fe         | 738364.9667 | 255915.1257 | 34.65970587 |

|            |                                                                                     |                 |             |             |             |
|------------|-------------------------------------------------------------------------------------|-----------------|-------------|-------------|-------------|
| UIJ66362.1 | chromosomal_replication_initiator_protein_DnaA_[Bacillus_cereus]                    | CPTF_Mn         | 879694.3667 | 291197.581  | 33.10213093 |
| UIJ66362.1 | chromosomal_replication_initiator_protein_DnaA_[Bacillus_cereus]                    | CPTF_Ni         | 682326.6667 | 205185.3521 | 30.07142504 |
| UIJ66362.1 | chromosomal_replication_initiator_protein_DnaA_[Bacillus_cereus]                    | CPTF_U          | 789810      | 266898.8683 | 33.79279425 |
| UIJ66362.1 | chromosomal_replication_initiator_protein_DnaA_[Bacillus_cereus]                    | CPTF_metals_mix | 686887.1667 | 390503.7249 | 56.85121864 |
| UIJ66362.1 | chromosomal_replication_initiator_protein_DnaA_[Bacillus_cereus]                    | CPTF_zcontrol   | 477019.3333 | 413890.7345 | 86.76602929 |
| UIJ66363.1 | 50S_ribosomal_protein_L34_[Bacillus_cereus]                                         | CPTF_Al         | 196258      | 177052.4384 | 90.21412549 |
| UIJ66363.1 | 50S_ribosomal_protein_L34_[Bacillus_cereus]                                         | CPTF_Cd         | 260417.3333 | 226502.3241 | 86.97666979 |
| UIJ66363.1 | 50S_ribosomal_protein_L34_[Bacillus_cereus]                                         | CPTF_Co         | 51132       | 88563.22189 | 173.2050808 |
| UIJ66363.1 | 50S_ribosomal_protein_L34_[Bacillus_cereus]                                         | CPTF_Cu         | 87847.66667 | 152156.622  | 173.2050808 |
| UIJ66363.1 | 50S_ribosomal_protein_L34_[Bacillus_cereus]                                         | CPTF_Fe         | 110487      | 191369.0976 | 173.2050808 |
| UIJ66363.1 | 50S_ribosomal_protein_L34_[Bacillus_cereus]                                         | CPTF_Mn         | 155583.3333 | 269478.2381 | 173.2050808 |
| UIJ66363.1 | 50S_ribosomal_protein_L34_[Bacillus_cereus]                                         | CPTF_Ni         | 20594.7     | 35671.06677 | 173.2050808 |
| UIJ66363.1 | 50S_ribosomal_protein_L34_[Bacillus_cereus]                                         | CPTF_U          | 0           | 0           | 0           |
| UIJ66363.1 | 50S_ribosomal_protein_L34_[Bacillus_cereus]                                         | CPTF_metals_mix | 225532      | 199628.1419 | 88.51433139 |
| UIJ66363.1 | 50S_ribosomal_protein_L34_[Bacillus_cereus]                                         | CPTF_zcontrol   | 0           | 0           | 0           |
| UIJ66366.1 | protein_jag_[Bacillus_cereus]                                                       | CPTF_Al         | 0           | 0           | 0           |
| UIJ66366.1 | protein_jag_[Bacillus_cereus]                                                       | CPTF_Cd         | 0           | 0           | 0           |
| UIJ66366.1 | protein_jag_[Bacillus_cereus]                                                       | CPTF_Co         | 20352.6     | 35251.73727 | 173.2050808 |
| UIJ66366.1 | protein_jag_[Bacillus_cereus]                                                       | CPTF_Cu         | 0           | 0           | 0           |
| UIJ66366.1 | protein_jag_[Bacillus_cereus]                                                       | CPTF_Fe         | 0           | 0           | 0           |
| UIJ66366.1 | protein_jag_[Bacillus_cereus]                                                       | CPTF_Mn         | 0           | 0           | 0           |
| UIJ66366.1 | protein_jag_[Bacillus_cereus]                                                       | CPTF_Ni         | 12332.53333 | 21360.57432 | 173.2050808 |
| UIJ66366.1 | protein_jag_[Bacillus_cereus]                                                       | CPTF_U          | 0           | 0           | 0           |
| UIJ66366.1 | protein_jag_[Bacillus_cereus]                                                       | CPTF_metals_mix | 0           | 0           | 0           |
| UIJ66366.1 | protein_jag_[Bacillus_cereus]                                                       | CPTF_zcontrol   | 0           | 0           | 0           |
| UIJ66367.1 | tRNA_uridine-5-carboxymethylaminomethyl(34)_synthesis_GTPase_MnmE_[Bacillus_cereus] | CPTF_Al         | 0           | 0           | 0           |
| UIJ66367.1 | tRNA_uridine-5-carboxymethylaminomethyl(34)_synthesis_GTPase_MnmE_[Bacillus_cereus] | CPTF_Cd         | 0           | 0           | 0           |
| UIJ66367.1 | tRNA_uridine-5-carboxymethylaminomethyl(34)_synthesis_GTPase_MnmE_[Bacillus_cereus] | CPTF_Co         | 0           | 0           | 0           |
| UIJ66367.1 | tRNA_uridine-5-carboxymethylaminomethyl(34)_synthesis_GTPase_MnmE_[Bacillus_cereus] | CPTF_Cu         | 0           | 0           | 0           |
| UIJ66367.1 | tRNA_uridine-5-carboxymethylaminomethyl(34)_synthesis_GTPase_MnmE_[Bacillus_cereus] | CPTF_Fe         | 51425.66667 | 89071.86748 | 173.2050808 |
| UIJ66367.1 | tRNA_uridine-5-carboxymethylaminomethyl(34)_synthesis_GTPase_MnmE_[Bacillus_cereus] | CPTF_Mn         | 0           | 0           | 0           |
| UIJ66367.1 | tRNA_uridine-5-carboxymethylaminomethyl(34)_synthesis_GTPase_MnmE_[Bacillus_cereus] | CPTF_Ni         | 0           | 0           | 0           |
| UIJ66367.1 | tRNA_uridine-5-carboxymethylaminomethyl(34)_synthesis_GTPase_MnmE_[Bacillus_cereus] | CPTF_U          | 127456.3333 | 114171.6435 | 89.57706576 |
| UIJ66367.1 | tRNA_uridine-5-carboxymethylaminomethyl(34)_synthesis_GTPase_MnmE_[Bacillus_cereus] | CPTF_metals_mix | 142058.5667 | 63072.19526 | 44.39872705 |
| UIJ66367.1 | tRNA_uridine-5-carboxymethylaminomethyl(34)_synthesis_GTPase_MnmE_[Bacillus_cereus] | CPTF_zcontrol   | 0           | 0           | 0           |
| UIJ66368.1 | tRNA_uridine-5-carboxymethylaminomethyl(34)_synthesis_enzyme_MnmG_[Bacillus_cereus] | CPTF_Al         | 649189.2    | 321404.0746 | 49.50853689 |
| UIJ66368.1 | tRNA_uridine-5-carboxymethylaminomethyl(34)_synthesis_enzyme_MnmG_[Bacillus_cereus] | CPTF_Cd         | 706336.7667 | 253498.3876 | 35.88916782 |
| UIJ66368.1 | tRNA_uridine-5-carboxymethylaminomethyl(34)_synthesis_enzyme_MnmG_[Bacillus_cereus] | CPTF_Co         | 826643.2    | 146811.8541 | 17.76000263 |
| UIJ66368.1 | tRNA_uridine-5-carboxymethylaminomethyl(34)_synthesis_enzyme_MnmG_[Bacillus_cereus] | CPTF_Cu         | 713402.3    | 201936.1319 | 28.30606684 |
| UIJ66368.1 | tRNA_uridine-5-carboxymethylaminomethyl(34)_synthesis_enzyme_MnmG_[Bacillus_cereus] | CPTF_Fe         | 609357.3667 | 211430.6387 | 34.69731397 |
| UIJ66368.1 | tRNA_uridine-5-carboxymethylaminomethyl(34)_synthesis_enzyme_MnmG_[Bacillus_cereus] | CPTF_Mn         | 467012.5667 | 259212.476  | 55.50438992 |
| UIJ66368.1 | tRNA_uridine-5-carboxymethylaminomethyl(34)_synthesis_enzyme_MnmG_[Bacillus_cereus] | CPTF_Ni         | 558241.7    | 302745.9799 | 54.23206111 |
| UIJ66368.1 | tRNA_uridine-5-carboxymethylaminomethyl(34)_synthesis_enzyme_MnmG_[Bacillus_cereus] | CPTF_U          | 427140.5333 | 339778.4724 | 79.54723232 |
| UIJ66368.1 | tRNA_uridine-5-carboxymethylaminomethyl(34)_synthesis_enzyme_MnmG_[Bacillus_cereus] | CPTF_metals_mix | 1070454.5   | 73480.49936 | 6.864420614 |
| UIJ66368.1 | tRNA_uridine-5-carboxymethylaminomethyl(34)_synthesis_enzyme_MnmG_[Bacillus_cereus] | CPTF_zcontrol   | 582786.0667 | 234273.6329 | 40.19890768 |
| UIJ66370.1 | nucleoid_occlusion_protein_[Bacillus_cereus]                                        | CPTF_Al         | 155264.9333 | 134857.9125 | 86.85664536 |
| UIJ66370.1 | nucleoid_occlusion_protein_[Bacillus_cereus]                                        | CPTF_Cd         | 185537.2333 | 133531.8832 | 71.97039689 |
| UIJ66370.1 | nucleoid_occlusion_protein_[Bacillus_cereus]                                        | CPTF_Co         | 45870.36667 | 33117.74708 | 72.19856627 |
| UIJ66370.1 | nucleoid_occlusion_protein_[Bacillus_cereus]                                        | CPTF_Cu         | 97081.56667 | 104247.0768 | 107.3809173 |
| UIJ66370.1 | nucleoid_occlusion_protein_[Bacillus_cereus]                                        | CPTF_Fe         | 109986.3    | 130897.3369 | 119.0124014 |
| UIJ66370.1 | nucleoid_occlusion_protein_[Bacillus_cereus]                                        | CPTF_Mn         | 103109.4667 | 90006.45968 | 87.2921397  |
| UIJ66370.1 | nucleoid_occlusion_protein_[Bacillus_cereus]                                        | CPTF_Ni         | 17190.86667 | 29775.45449 | 173.2050808 |
| UIJ66370.1 | nucleoid_occlusion_protein_[Bacillus_cereus]                                        | CPTF_U          | 0           | 0           | 0           |
| UIJ66370.1 | nucleoid_occlusion_protein_[Bacillus_cereus]                                        | CPTF_metals_mix | 152077.6667 | 12805.24227 | 8.420199068 |
| UIJ66370.1 | nucleoid_occlusion_protein_[Bacillus_cereus]                                        | CPTF_zcontrol   | 72487.03333 | 102627.1987 | 141.5800785 |
| UIJ66371.1 | sporulation_initiation_inhibitor_protein_Soj_[Bacillus_cereus]                      | CPTF_Al         | 292180      | 41596.43865 | 14.23657973 |
| UIJ66371.1 | sporulation_initiation_inhibitor_protein_Soj_[Bacillus_cereus]                      | CPTF_Cd         | 371946.5    | 132010.4025 | 35.49177167 |
| UIJ66371.1 | sporulation_initiation_inhibitor_protein_Soj_[Bacillus_cereus]                      | CPTF_Co         | 252740      | 8574.107825 | 3.392461749 |
| UIJ66371.1 | sporulation_initiation_inhibitor_protein_Soj_[Bacillus_cereus]                      | CPTF_Cu         | 263185.6667 | 51010.96451 | 19.38212105 |
| UIJ66371.1 | sporulation_initiation_inhibitor_protein_Soj_[Bacillus_cereus]                      | CPTF_Fe         | 378436.6    | 39792.73169 | 10.51503256 |
| UIJ66371.1 | sporulation_initiation_inhibitor_protein_Soj_[Bacillus_cereus]                      | CPTF_Mn         | 247984.3333 | 76338.25738 | 30.78350005 |

|            |                                                                |                 |             |             |             |
|------------|----------------------------------------------------------------|-----------------|-------------|-------------|-------------|
| UIJ66371.1 | sporulation_initiation_inhibitor_protein_Soj_[Bacillus_cereus] | CPTF_Ni         | 309928.3333 | 65026.06598 | 20.98100076 |
| UIJ66371.1 | sporulation_initiation_inhibitor_protein_Soj_[Bacillus_cereus] | CPTF_U          | 233742.6667 | 42946.18125 | 18.37327428 |
| UIJ66371.1 | sporulation_initiation_inhibitor_protein_Soj_[Bacillus_cereus] | CPTF_metals_mix | 208911.2333 | 11002.74853 | 5.266709861 |
| UIJ66371.1 | sporulation_initiation_inhibitor_protein_Soj_[Bacillus_cereus] | CPTF_zcontrol   | 188893.6667 | 117245.2932 | 62.0694676  |
| UIJ66372.1 | stage_0_sporulation_protein_Spo0_[Bacillus_cereus]             | CPTF_Al         | 746391.3    | 211599.5244 | 28.34967723 |
| UIJ66372.1 | stage_0_sporulation_protein_Spo0_[Bacillus_cereus]             | CPTF_Cd         | 675882.9    | 449404.062  | 66.49140879 |
| UIJ66372.1 | stage_0_sporulation_protein_Spo0_[Bacillus_cereus]             | CPTF_Co         | 821314.5333 | 156358.9606 | 19.03764687 |
| UIJ66372.1 | stage_0_sporulation_protein_Spo0_[Bacillus_cereus]             | CPTF_Cu         | 798633.1333 | 127308.4517 | 15.94079263 |
| UIJ66372.1 | stage_0_sporulation_protein_Spo0_[Bacillus_cereus]             | CPTF_Fe         | 604285.2    | 136904.72   | 22.6556467  |
| UIJ66372.1 | stage_0_sporulation_protein_Spo0_[Bacillus_cereus]             | CPTF_Mn         | 539479.3333 | 349189.4944 | 64.72713092 |
| UIJ66372.1 | stage_0_sporulation_protein_Spo0_[Bacillus_cereus]             | CPTF_Ni         | 689757.3667 | 198309.2957 | 28.75058757 |
| UIJ66372.1 | stage_0_sporulation_protein_Spo0_[Bacillus_cereus]             | CPTF_U          | 430956.0667 | 403129.8886 | 93.54315202 |
| UIJ66372.1 | stage_0_sporulation_protein_Spo0_[Bacillus_cereus]             | CPTF_metals_mix | 746558.8667 | 57840.88172 | 7.747665228 |
| UIJ66372.1 | stage_0_sporulation_protein_Spo0_[Bacillus_cereus]             | CPTF_zcontrol   | 562268.9333 | 390133.6958 | 69.38560406 |
| UIJ66375.1 | DUF951_domain-containing_protein_[Bacillus_cereus]             | CPTF_Al         | 116759.5667 | 36132.23613 | 30.94584638 |
| UIJ66375.1 | DUF951_domain-containing_protein_[Bacillus_cereus]             | CPTF_Cd         | 81377.4     | 92988.92953 | 114.2687399 |
| UIJ66375.1 | DUF951_domain-containing_protein_[Bacillus_cereus]             | CPTF_Co         | 14108.83333 | 24437.21617 | 173.2050808 |
| UIJ66375.1 | DUF951_domain-containing_protein_[Bacillus_cereus]             | CPTF_Cu         | 93362.63333 | 33278.80476 | 35.64467236 |
| UIJ66375.1 | DUF951_domain-containing_protein_[Bacillus_cereus]             | CPTF_Fe         | 145356.5    | 77953.52426 | 53.62919736 |
| UIJ66375.1 | DUF951_domain-containing_protein_[Bacillus_cereus]             | CPTF_Mn         | 0           | 0           | 0           |
| UIJ66375.1 | DUF951_domain-containing_protein_[Bacillus_cereus]             | CPTF_Ni         | 79040.43333 | 34316.47817 | 43.41635885 |
| UIJ66375.1 | DUF951_domain-containing_protein_[Bacillus_cereus]             | CPTF_U          | 71487.93333 | 64133.90592 | 89.71291088 |
| UIJ66375.1 | DUF951_domain-containing_protein_[Bacillus_cereus]             | CPTF_metals_mix | 223899      | 38366.7333  | 17.13573232 |
| UIJ66375.1 | DUF951_domain-containing_protein_[Bacillus_cereus]             | CPTF_zcontrol   | 0           | 0           | 0           |
| UIJ66376.1 | redox-regulated_ATPase_YchF_[Bacillus_cereus]                  | CPTF_Al         | 1533698.867 | 219836.4263 | 14.3337412  |
| UIJ66376.1 | redox-regulated_ATPase_YchF_[Bacillus_cereus]                  | CPTF_Cd         | 1891035.767 | 347273.7336 | 18.36420758 |
| UIJ66376.1 | redox-regulated_ATPase_YchF_[Bacillus_cereus]                  | CPTF_Co         | 1776743.7   | 100217.2211 | 5.640499589 |
| UIJ66376.1 | redox-regulated_ATPase_YchF_[Bacillus_cereus]                  | CPTF_Cu         | 1784936.033 | 176557.2784 | 9.891518524 |
| UIJ66376.1 | redox-regulated_ATPase_YchF_[Bacillus_cereus]                  | CPTF_Fe         | 1625293.233 | 77228.82133 | 4.751685403 |
| UIJ66376.1 | redox-regulated_ATPase_YchF_[Bacillus_cereus]                  | CPTF_Mn         | 1488935.567 | 247127.7509 | 16.59761217 |
| UIJ66376.1 | redox-regulated_ATPase_YchF_[Bacillus_cereus]                  | CPTF_Ni         | 1629454.767 | 150248.5184 | 9.220784855 |
| UIJ66376.1 | redox-regulated_ATPase_YchF_[Bacillus_cereus]                  | CPTF_U          | 1358933.62  | 460176.1285 | 33.86303214 |
| UIJ66376.1 | redox-regulated_ATPase_YchF_[Bacillus_cereus]                  | CPTF_metals_mix | 2591358.683 | 241170.6698 | 9.306726675 |
| UIJ66376.1 | redox-regulated_ATPase_YchF_[Bacillus_cereus]                  | CPTF_zcontrol   | 1448809.667 | 299018.458  | 20.6389055  |
| UIJ66377.1 | 30S_ribosomal_protein_S6_[Bacillus_cereus]                     | CPTF_Al         | 6688097.333 | 964434.3328 | 14.42015995 |
| UIJ66377.1 | 30S_ribosomal_protein_S6_[Bacillus_cereus]                     | CPTF_Cd         | 7060744.667 | 710838.983  | 10.06747895 |
| UIJ66377.1 | 30S_ribosomal_protein_S6_[Bacillus_cereus]                     | CPTF_Co         | 7343430.6   | 357031.4446 | 4.861916236 |
| UIJ66377.1 | 30S_ribosomal_protein_S6_[Bacillus_cereus]                     | CPTF_Cu         | 6838044.667 | 296160.0682 | 4.331063669 |
| UIJ66377.1 | 30S_ribosomal_protein_S6_[Bacillus_cereus]                     | CPTF_Fe         | 6354383.367 | 360216.025  | 5.668780182 |
| UIJ66377.1 | 30S_ribosomal_protein_S6_[Bacillus_cereus]                     | CPTF_Mn         | 6790459.333 | 968041.1252 | 14.25590049 |
| UIJ66377.1 | 30S_ribosomal_protein_S6_[Bacillus_cereus]                     | CPTF_Ni         | 5656958.667 | 568466.858  | 10.04898376 |
| UIJ66377.1 | 30S_ribosomal_protein_S6_[Bacillus_cereus]                     | CPTF_U          | 5534801     | 915494.8132 | 16.54069971 |
| UIJ66377.1 | 30S_ribosomal_protein_S6_[Bacillus_cereus]                     | CPTF_metals_mix | 8844911.233 | 1695261.613 | 19.16651923 |
| UIJ66377.1 | 30S_ribosomal_protein_S6_[Bacillus_cereus]                     | CPTF_zcontrol   | 6004304.433 | 243519.1529 | 4.055742936 |
| UIJ66378.1 | single-stranded_DNA-binding_protein_[Bacillus_cereus]          | CPTF_Al         | 122914.6    | 58558.26017 | 47.64141946 |
| UIJ66378.1 | single-stranded_DNA-binding_protein_[Bacillus_cereus]          | CPTF_Cd         | 364644.5667 | 73756.2534  | 20.22688945 |
| UIJ66378.1 | single-stranded_DNA-binding_protein_[Bacillus_cereus]          | CPTF_Co         | 84726.93333 | 73621.04    | 86.89213348 |
| UIJ66378.1 | single-stranded_DNA-binding_protein_[Bacillus_cereus]          | CPTF_Cu         | 189019.0333 | 164149.4996 | 86.84284153 |
| UIJ66378.1 | single-stranded_DNA-binding_protein_[Bacillus_cereus]          | CPTF_Fe         | 216542.7667 | 124659.1833 | 57.56792768 |
| UIJ66378.1 | single-stranded_DNA-binding_protein_[Bacillus_cereus]          | CPTF_Mn         | 133611.9667 | 152959.0332 | 114.4800402 |
| UIJ66378.1 | single-stranded_DNA-binding_protein_[Bacillus_cereus]          | CPTF_Ni         | 84385.4     | 74567.76367 | 88.3657169  |
| UIJ66378.1 | single-stranded_DNA-binding_protein_[Bacillus_cereus]          | CPTF_U          | 58089.13333 | 2795.286909 | 4.812065095 |
| UIJ66378.1 | single-stranded_DNA-binding_protein_[Bacillus_cereus]          | CPTF_metals_mix | 345457.4333 | 106074.5979 | 30.70554797 |
| UIJ66378.1 | single-stranded_DNA-binding_protein_[Bacillus_cereus]          | CPTF_zcontrol   | 126457.7333 | 138242.0193 | 109.3187547 |
| UIJ66379.1 | 30S_ribosomal_protein_S18_[Bacillus_cereus]                    | CPTF_Al         | 2499308.667 | 551414.8614 | 22.06269553 |
| UIJ66379.1 | 30S_ribosomal_protein_S18_[Bacillus_cereus]                    | CPTF_Cd         | 2521476.333 | 371737.3958 | 14.74284692 |
| UIJ66379.1 | 30S_ribosomal_protein_S18_[Bacillus_cereus]                    | CPTF_Co         | 2408741.333 | 438871.6724 | 18.21995854 |
| UIJ66379.1 | 30S_ribosomal_protein_S18_[Bacillus_cereus]                    | CPTF_Cu         | 2397748     | 455148.646  | 18.98233868 |
| UIJ66379.1 | 30S_ribosomal_protein_S18_[Bacillus_cereus]                    | CPTF_Fe         | 2901388     | 311024.659  | 10.71985749 |
| UIJ66379.1 | 30S_ribosomal_protein_S18_[Bacillus_cereus]                    | CPTF_Mn         | 2337037.333 | 300293.9852 | 12.8493448  |
| UIJ66379.1 | 30S_ribosomal_protein_S18_[Bacillus_cereus]                    | CPTF_Ni         | 1956433.333 | 209995.9733 | 10.73361252 |

|            |                                                                            |                 |             |             |              |
|------------|----------------------------------------------------------------------------|-----------------|-------------|-------------|--------------|
| UIJ66379.1 | 30S_ribosomal_protein_S18_[Bacillus_cereus]                                | CPTF_U          | 1718633.833 | 813221.015  | 47.31787535  |
| UIJ66379.1 | 30S_ribosomal_protein_S18_[Bacillus_cereus]                                | CPTF_metals_mix | 2308485.333 | 472873.0813 | 20.4841276   |
| UIJ66379.1 | 30S_ribosomal_protein_S18_[Bacillus_cereus]                                | CPTF_zcontrol   | 1961390.6   | 307896.6541 | 15.69787548  |
| UIJ66382.1 | 50S_ribosomal_protein_L9_[Bacillus_cereus]                                 | CPTF_Al         | 3687168     | 1139034.82  | 30.89186119  |
| UIJ66382.1 | 50S_ribosomal_protein_L9_[Bacillus_cereus]                                 | CPTF_Cd         | 4760512     | 152282.1732 | 3.19886124   |
| UIJ66382.1 | 50S_ribosomal_protein_L9_[Bacillus_cereus]                                 | CPTF_Co         | 4149316     | 146752.5611 | 3.536789224  |
| UIJ66382.1 | 50S_ribosomal_protein_L9_[Bacillus_cereus]                                 | CPTF_Cu         | 4228394.333 | 252403.2814 | 5.969246514  |
| UIJ66382.1 | 50S_ribosomal_protein_L9_[Bacillus_cereus]                                 | CPTF_Fe         | 4601995     | 325381.8489 | 7.07045203   |
| UIJ66382.1 | 50S_ribosomal_protein_L9_[Bacillus_cereus]                                 | CPTF_Mn         | 3949034.333 | 495667.6821 | 12.55161744  |
| UIJ66382.1 | 50S_ribosomal_protein_L9_[Bacillus_cereus]                                 | CPTF_Ni         | 2776134     | 166862.6344 | 6.010611679  |
| UIJ66382.1 | 50S_ribosomal_protein_L9_[Bacillus_cereus]                                 | CPTF_U          | 3885253.667 | 160584.8053 | 4.133187149  |
| UIJ66382.1 | 50S_ribosomal_protein_L9_[Bacillus_cereus]                                 | CPTF_metals_mix | 4538687.667 | 487964.7946 | 10.75123098  |
| UIJ66382.1 | 50S_ribosomal_protein_L9_[Bacillus_cereus]                                 | CPTF_zcontrol   | 4078325.333 | 478821.7343 | 11.74064586  |
| UIJ66384.1 | adenylosuccinate_synthase_[Bacillus_cereus]                                | CPTF_Al         | 14836225.87 | 1775014.614 | 11.96405764  |
| UIJ66384.1 | adenylosuccinate_synthase_[Bacillus_cereus]                                | CPTF_Cd         | 14966457.77 | 1135056.751 | 7.584003968  |
| UIJ66384.1 | adenylosuccinate_synthase_[Bacillus_cereus]                                | CPTF_Co         | 13466306.6  | 1692784.998 | 12.57052174  |
| UIJ66384.1 | adenylosuccinate_synthase_[Bacillus_cereus]                                | CPTF_Cu         | 12465426.4  | 1247584.599 | 10.00835879  |
| UIJ66384.1 | adenylosuccinate_synthase_[Bacillus_cereus]                                | CPTF_Fe         | 14650506.27 | 444109.4297 | 3.031358928  |
| UIJ66384.1 | adenylosuccinate_synthase_[Bacillus_cereus]                                | CPTF_Mn         | 14599177.13 | 682885.5771 | 4.677562104  |
| UIJ66384.1 | adenylosuccinate_synthase_[Bacillus_cereus]                                | CPTF_Ni         | 10741233.23 | 2009669.999 | 18.70986278  |
| UIJ66384.1 | adenylosuccinate_synthase_[Bacillus_cereus]                                | CPTF_U          | 12935601.23 | 2209846.496 | 17.08344635  |
| UIJ66384.1 | adenylosuccinate_synthase_[Bacillus_cereus]                                | CPTF_metals_mix | 10178007.9  | 1111149.877 | 10.91716462  |
| UIJ66384.1 | adenylosuccinate_synthase_[Bacillus_cereus]                                | CPTF_zcontrol   | 14478687.73 | 624005.7355 | 4.309822458  |
| UIJ66385.1 | cell_wall_metabolism_DNA-binding_response_regulator_WalR_[Bacillus_cereus] | CPTF_Al         | 380684.1333 | 305055.4152 | 80.13347248  |
| UIJ66385.1 | cell_wall_metabolism_DNA-binding_response_regulator_WalR_[Bacillus_cereus] | CPTF_Cd         | 278735.1    | 149751.8799 | 53.72551928  |
| UIJ66385.1 | cell_wall_metabolism_DNA-binding_response_regulator_WalR_[Bacillus_cereus] | CPTF_Co         | 562222      | 423533.4117 | 75.33205952  |
| UIJ66385.1 | cell_wall_metabolism_DNA-binding_response_regulator_WalR_[Bacillus_cereus] | CPTF_Cu         | 1176850.533 | 77678.61065 | 6.600550236  |
| UIJ66385.1 | cell_wall_metabolism_DNA-binding_response_regulator_WalR_[Bacillus_cereus] | CPTF_Fe         | 501243.4667 | 509135.6943 | 101.5745298  |
| UIJ66385.1 | cell_wall_metabolism_DNA-binding_response_regulator_WalR_[Bacillus_cereus] | CPTF_Mn         | 587764.8    | 409100.2324 | 69.60271053  |
| UIJ66385.1 | cell_wall_metabolism_DNA-binding_response_regulator_WalR_[Bacillus_cereus] | CPTF_Ni         | 545126.8667 | 455016.5308 | 83.46984136  |
| UIJ66385.1 | cell_wall_metabolism_DNA-binding_response_regulator_WalR_[Bacillus_cereus] | CPTF_U          | 853319.3333 | 350471.418  | 41.071543312 |
| UIJ66385.1 | cell_wall_metabolism_DNA-binding_response_regulator_WalR_[Bacillus_cereus] | CPTF_metals_mix | 2568525.9   | 492097.8955 | 19.15876712  |
| UIJ66385.1 | cell_wall_metabolism_DNA-binding_response_regulator_WalR_[Bacillus_cereus] | CPTF_zcontrol   | 175282.8333 | 94204.32388 | 53.74418139  |
| UIJ66398.1 | UDP-glucose_4-epimerase_GalE_[Bacillus_cereus]                             | CPTF_Al         | 390119.3333 | 34128.54202 | 8.748231401  |
| UIJ66398.1 | UDP-glucose_4-epimerase_GalE_[Bacillus_cereus]                             | CPTF_Cd         | 437573      | 25707.24093 | 5.874960504  |
| UIJ66398.1 | UDP-glucose_4-epimerase_GalE_[Bacillus_cereus]                             | CPTF_Co         | 370276      | 15133.13606 | 4.086988101  |
| UIJ66398.1 | UDP-glucose_4-epimerase_GalE_[Bacillus_cereus]                             | CPTF_Cu         | 721086.3333 | 251152.932  | 34.82980059  |
| UIJ66398.1 | UDP-glucose_4-epimerase_GalE_[Bacillus_cereus]                             | CPTF_Fe         | 501359.6667 | 206873.8715 | 41.26256763  |
| UIJ66398.1 | UDP-glucose_4-epimerase_GalE_[Bacillus_cereus]                             | CPTF_Mn         | 379413      | 86004.45726 | 22.66776765  |
| UIJ66398.1 | UDP-glucose_4-epimerase_GalE_[Bacillus_cereus]                             | CPTF_Ni         | 424914      | 27601.12058 | 6.495695735  |
| UIJ66398.1 | UDP-glucose_4-epimerase_GalE_[Bacillus_cereus]                             | CPTF_U          | 440879.6667 | 156263.8865 | 35.44365919  |
| UIJ66398.1 | UDP-glucose_4-epimerase_GalE_[Bacillus_cereus]                             | CPTF_metals_mix | 1191077     | 68147.29325 | 5.721485114  |
| UIJ66398.1 | UDP-glucose_4-epimerase_GalE_[Bacillus_cereus]                             | CPTF_zcontrol   | 423834.6667 | 20357.93875 | 4.803273624  |
| UIJ66401.1 | superoxide_dismutase_[Mn]_[Bacillus_cereus]                                | CPTF_Al         | 20539.3     | 35575.11115 | 173.2050808  |
| UIJ66401.1 | superoxide_dismutase_[Mn]_[Bacillus_cereus]                                | CPTF_Cd         | 60643.8     | 53435.93836 | 88.11442944  |
| UIJ66401.1 | superoxide_dismutase_[Mn]_[Bacillus_cereus]                                | CPTF_Co         | 18960.06667 | 17482.06786 | 92.20467505  |
| UIJ66401.1 | superoxide_dismutase_[Mn]_[Bacillus_cereus]                                | CPTF_Cu         | 53526.2     | 19861.29596 | 37.10574626  |
| UIJ66401.1 | superoxide_dismutase_[Mn]_[Bacillus_cereus]                                | CPTF_Fe         | 41176.33333 | 71319.5014  | 173.2050808  |
| UIJ66401.1 | superoxide_dismutase_[Mn]_[Bacillus_cereus]                                | CPTF_Mn         | 0           | 0           | 0            |
| UIJ66401.1 | superoxide_dismutase_[Mn]_[Bacillus_cereus]                                | CPTF_Ni         | 28924.16667 | 50098.12623 | 173.2050808  |
| UIJ66401.1 | superoxide_dismutase_[Mn]_[Bacillus_cereus]                                | CPTF_U          | 0           | 0           | 0            |
| UIJ66401.1 | superoxide_dismutase_[Mn]_[Bacillus_cereus]                                | CPTF_metals_mix | 38403.26667 | 33268.26745 | 86.6287437   |
| UIJ66401.1 | superoxide_dismutase_[Mn]_[Bacillus_cereus]                                | CPTF_zcontrol   | 24815.06667 | 42980.95626 | 173.2050808  |
| UIJ66409.1 | peptide-methionine_(R)-S-oxide_reductase_MsrB_[Bacillus_cereus]            | CPTF_Al         | 0           | 0           | 0            |
| UIJ66409.1 | peptide-methionine_(R)-S-oxide_reductase_MsrB_[Bacillus_cereus]            | CPTF_Cd         | 0           | 0           | 0            |
| UIJ66409.1 | peptide-methionine_(R)-S-oxide_reductase_MsrB_[Bacillus_cereus]            | CPTF_Co         | 0           | 0           | 0            |
| UIJ66409.1 | peptide-methionine_(R)-S-oxide_reductase_MsrB_[Bacillus_cereus]            | CPTF_Cu         | 0           | 0           | 0            |
| UIJ66409.1 | peptide-methionine_(R)-S-oxide_reductase_MsrB_[Bacillus_cereus]            | CPTF_Fe         | 0           | 0           | 0            |
| UIJ66409.1 | peptide-methionine_(R)-S-oxide_reductase_MsrB_[Bacillus_cereus]            | CPTF_Mn         | 31298.86667 | 54211.22729 | 173.2050808  |
| UIJ66409.1 | peptide-methionine_(R)-S-oxide_reductase_MsrB_[Bacillus_cereus]            | CPTF_Ni         | 0           | 0           | 0            |
| UIJ66409.1 | peptide-methionine_(R)-S-oxide_reductase_MsrB_[Bacillus_cereus]            | CPTF_U          | 0           | 0           | 0            |

|            |                                                                 |                 |             |             |             |
|------------|-----------------------------------------------------------------|-----------------|-------------|-------------|-------------|
| UIJ66409.1 | peptide-methionine_(R)-S-oxide_reductase_MsrB_[Bacillus_cereus] | CPTF_metals_mix | 69226.96667 | 66075.16572 | 95.44714857 |
| UIJ66409.1 | peptide-methionine_(R)-S-oxide_reductase_MsrB_[Bacillus_cereus] | CPTF_zcontrol   | 0           | 0           | 0           |
| UIJ66412.1 | glycosyltransferase_family_2_protein_[Bacillus_cereus]          | CPTF_Al         | 0           | 0           | 0           |
| UIJ66412.1 | glycosyltransferase_family_2_protein_[Bacillus_cereus]          | CPTF_Cd         | 9559.433333 | 16557.42422 | 173.2050808 |
| UIJ66412.1 | glycosyltransferase_family_2_protein_[Bacillus_cereus]          | CPTF_Co         | 9961.4      | 17253.65091 | 173.2050808 |
| UIJ66412.1 | glycosyltransferase_family_2_protein_[Bacillus_cereus]          | CPTF_Cu         | 9511.333333 | 16474.11258 | 173.2050808 |
| UIJ66412.1 | glycosyltransferase_family_2_protein_[Bacillus_cereus]          | CPTF_Fe         | 7535.533333 | 13051.9266  | 173.2050808 |
| UIJ66412.1 | glycosyltransferase_family_2_protein_[Bacillus_cereus]          | CPTF_Mn         | 0           | 0           | 0           |
| UIJ66412.1 | glycosyltransferase_family_2_protein_[Bacillus_cereus]          | CPTF_Ni         | 0           | 0           | 0           |
| UIJ66412.1 | glycosyltransferase_family_2_protein_[Bacillus_cereus]          | CPTF_U          | 0           | 0           | 0           |
| UIJ66412.1 | glycosyltransferase_family_2_protein_[Bacillus_cereus]          | CPTF_metals_mix | 11644.06667 | 20168.11507 | 173.2050808 |
| UIJ66412.1 | glycosyltransferase_family_2_protein_[Bacillus_cereus]          | CPTF_zcontrol   | 0           | 0           | 0           |
| UIJ66413.1 | YfhO_family_protein_[Bacillus_cereus]                           | CPTF_Al         | 22288.6     | 38604.98763 | 173.2050808 |
| UIJ66413.1 | YfhO_family_protein_[Bacillus_cereus]                           | CPTF_Cd         | 40060.53333 | 4360.207432 | 10.88404739 |
| UIJ66413.1 | YfhO_family_protein_[Bacillus_cereus]                           | CPTF_Co         | 39468.56667 | 35811.8355  | 90.73507989 |
| UIJ66413.1 | YfhO_family_protein_[Bacillus_cereus]                           | CPTF_Cu         | 55759.4     | 12346.0291  | 22.14161038 |
| UIJ66413.1 | YfhO_family_protein_[Bacillus_cereus]                           | CPTF_Fe         | 23698.23333 | 41046.54418 | 173.2050808 |
| UIJ66413.1 | YfhO_family_protein_[Bacillus_cereus]                           | CPTF_Mn         | 28287.83333 | 24515.98104 | 86.66616759 |
| UIJ66413.1 | YfhO_family_protein_[Bacillus_cereus]                           | CPTF_Ni         | 23631.46667 | 40930.90092 | 173.2050808 |
| UIJ66413.1 | YfhO_family_protein_[Bacillus_cereus]                           | CPTF_U          | 42748.3     | 7754.107617 | 18.13898475 |
| UIJ66413.1 | YfhO_family_protein_[Bacillus_cereus]                           | CPTF_metals_mix | 42711.93333 | 28334.2099  | 66.33792406 |
| UIJ66413.1 | YfhO_family_protein_[Bacillus_cereus]                           | CPTF_zcontrol   | 0           | 0           | 0           |
| UIJ66423.1 | glycosyltransferase_family_4_protein_[Bacillus_cereus]          | CPTF_Al         | 0           | 0           | 0           |
| UIJ66423.1 | glycosyltransferase_family_4_protein_[Bacillus_cereus]          | CPTF_Cd         | 0           | 0           | 0           |
| UIJ66423.1 | glycosyltransferase_family_4_protein_[Bacillus_cereus]          | CPTF_Co         | 9435        | 16341.89937 | 173.2050808 |
| UIJ66423.1 | glycosyltransferase_family_4_protein_[Bacillus_cereus]          | CPTF_Cu         | 0           | 0           | 0           |
| UIJ66423.1 | glycosyltransferase_family_4_protein_[Bacillus_cereus]          | CPTF_Fe         | 0           | 0           | 0           |
| UIJ66423.1 | glycosyltransferase_family_4_protein_[Bacillus_cereus]          | CPTF_Mn         | 0           | 0           | 0           |
| UIJ66423.1 | glycosyltransferase_family_4_protein_[Bacillus_cereus]          | CPTF_Ni         | 0           | 0           | 0           |
| UIJ66423.1 | glycosyltransferase_family_4_protein_[Bacillus_cereus]          | CPTF_U          | 0           | 0           | 0           |
| UIJ66423.1 | glycosyltransferase_family_4_protein_[Bacillus_cereus]          | CPTF_metals_mix | 258027.1    | 37442.83492 | 14.51120247 |
| UIJ66423.1 | glycosyltransferase_family_4_protein_[Bacillus_cereus]          | CPTF_zcontrol   | 0           | 0           | 0           |
| UIJ66430.1 | pyridoxine/pyridoxal/pyridoxamine_kinase_[Bacillus_cereus]      | CPTF_Al         | 115875.0667 | 26886.9535  | 23.20339851 |
| UIJ66430.1 | pyridoxine/pyridoxal/pyridoxamine_kinase_[Bacillus_cereus]      | CPTF_Cd         | 110460      | 18481.46296 | 16.73136244 |
| UIJ66430.1 | pyridoxine/pyridoxal/pyridoxamine_kinase_[Bacillus_cereus]      | CPTF_Co         | 124984.5667 | 51841.65885 | 41.47844829 |
| UIJ66430.1 | pyridoxine/pyridoxal/pyridoxamine_kinase_[Bacillus_cereus]      | CPTF_Cu         | 110537.9    | 51016.13395 | 46.1526173  |
| UIJ66430.1 | pyridoxine/pyridoxal/pyridoxamine_kinase_[Bacillus_cereus]      | CPTF_Fe         | 87154.23333 | 33652.85639 | 38.61299113 |
| UIJ66430.1 | pyridoxine/pyridoxal/pyridoxamine_kinase_[Bacillus_cereus]      | CPTF_Mn         | 54587.86667 | 47605.60404 | 87.2091308  |
| UIJ66430.1 | pyridoxine/pyridoxal/pyridoxamine_kinase_[Bacillus_cereus]      | CPTF_Ni         | 26627.73333 | 46120.58702 | 173.2050808 |
| UIJ66430.1 | pyridoxine/pyridoxal/pyridoxamine_kinase_[Bacillus_cereus]      | CPTF_U          | 60651.66667 | 54770.9268  | 90.3040754  |
| UIJ66430.1 | pyridoxine/pyridoxal/pyridoxamine_kinase_[Bacillus_cereus]      | CPTF_metals_mix | 634824.8667 | 145901.8912 | 22.98301451 |
| UIJ66430.1 | pyridoxine/pyridoxal/pyridoxamine_kinase_[Bacillus_cereus]      | CPTF_zcontrol   | 19947.16667 | 34549.50613 | 173.2050808 |
| UIJ66432.1 | FMN-dependent_NADH-azoreductase_[Bacillus_cereus]               | CPTF_Al         | 4718118.767 | 529326.3057 | 11.2190119  |
| UIJ66432.1 | FMN-dependent_NADH-azoreductase_[Bacillus_cereus]               | CPTF_Cd         | 4492870.333 | 343948.4932 | 7.655428883 |
| UIJ66432.1 | FMN-dependent_NADH-azoreductase_[Bacillus_cereus]               | CPTF_Co         | 6116542.733 | 552454.6858 | 9.032139722 |
| UIJ66432.1 | FMN-dependent_NADH-azoreductase_[Bacillus_cereus]               | CPTF_Cu         | 6823618.533 | 88180.17844 | 1.29227884  |
| UIJ66432.1 | FMN-dependent_NADH-azoreductase_[Bacillus_cereus]               | CPTF_Fe         | 4341458.2   | 277414.9724 | 6.389903107 |
| UIJ66432.1 | FMN-dependent_NADH-azoreductase_[Bacillus_cereus]               | CPTF_Mn         | 4685501.4   | 769106.3439 | 16.41460066 |
| UIJ66432.1 | FMN-dependent_NADH-azoreductase_[Bacillus_cereus]               | CPTF_Ni         | 5119004.7   | 220489.2257 | 4.3072675   |
| UIJ66432.1 | FMN-dependent_NADH-azoreductase_[Bacillus_cereus]               | CPTF_U          | 4723587.833 | 663630.0137 | 14.04927858 |
| UIJ66432.1 | FMN-dependent_NADH-azoreductase_[Bacillus_cereus]               | CPTF_metals_mix | 8839675.2   | 666303.068  | 7.537641971 |
| UIJ66432.1 | FMN-dependent_NADH-azoreductase_[Bacillus_cereus]               | CPTF_zcontrol   | 4660773.4   | 281529.0851 | 6.040394178 |
| UIJ66438.1 | homoserine_dehydrogenase_[Bacillus_cereus]                      | CPTF_Al         | 916299.7    | 161824.804  | 17.66068503 |
| UIJ66438.1 | homoserine_dehydrogenase_[Bacillus_cereus]                      | CPTF_Cd         | 991299.2333 | 88803.6624  | 8.958310409 |
| UIJ66438.1 | homoserine_dehydrogenase_[Bacillus_cereus]                      | CPTF_Co         | 1040797.1   | 265589.2836 | 25.51787314 |
| UIJ66438.1 | homoserine_dehydrogenase_[Bacillus_cereus]                      | CPTF_Cu         | 773092.7667 | 210611.9679 | 27.24278081 |
| UIJ66438.1 | homoserine_dehydrogenase_[Bacillus_cereus]                      | CPTF_Fe         | 1084726.933 | 197707.0519 | 18.22643523 |
| UIJ66438.1 | homoserine_dehydrogenase_[Bacillus_cereus]                      | CPTF_Mn         | 933228.9667 | 155676.0131 | 16.68143818 |
| UIJ66438.1 | homoserine_dehydrogenase_[Bacillus_cereus]                      | CPTF_Ni         | 1120104.733 | 228475.7075 | 20.39770931 |
| UIJ66438.1 | homoserine_dehydrogenase_[Bacillus_cereus]                      | CPTF_U          | 896699.9667 | 372777.517  | 41.5721569  |
| UIJ66438.1 | homoserine_dehydrogenase_[Bacillus_cereus]                      | CPTF_metals_mix | 1035361.7   | 178741.4285 | 17.26367013 |

|            |                                                |                 |             |             |             |
|------------|------------------------------------------------|-----------------|-------------|-------------|-------------|
| UIJ66438.1 | homoserine_dehydrogenase_[Bacillus_cereus]     | CPTF_zcontrol   | 829765.6    | 89156.77987 | 10.74481515 |
| UIJ66444.1 | uracil-DNA_glycosylase_[Bacillus_cereus]       | CPTF_Al         | 0           | 0           | 0           |
| UIJ66444.1 | uracil-DNA_glycosylase_[Bacillus_cereus]       | CPTF_Cd         | 0           | 0           | 0           |
| UIJ66444.1 | uracil-DNA_glycosylase_[Bacillus_cereus]       | CPTF_Co         | 0           | 0           | 0           |
| UIJ66444.1 | uracil-DNA_glycosylase_[Bacillus_cereus]       | CPTF_Cu         | 0           | 0           | 0           |
| UIJ66444.1 | uracil-DNA_glycosylase_[Bacillus_cereus]       | CPTF_Fe         | 0           | 0           | 0           |
| UIJ66444.1 | uracil-DNA_glycosylase_[Bacillus_cereus]       | CPTF_Mn         | 23114       | 40034.62237 | 173.2050808 |
| UIJ66444.1 | uracil-DNA_glycosylase_[Bacillus_cereus]       | CPTF_Ni         | 0           | 0           | 0           |
| UIJ66444.1 | uracil-DNA_glycosylase_[Bacillus_cereus]       | CPTF_U          | 0           | 0           | 0           |
| UIJ66444.1 | uracil-DNA_glycosylase_[Bacillus_cereus]       | CPTF_metals_mix | 0           | 0           | 0           |
| UIJ66444.1 | uracil-DNA_glycosylase_[Bacillus_cereus]       | CPTF_zcontrol   | 0           | 0           | 0           |
| UIJ66452.1 | heme-dependent_peroxidase_[Bacillus_cereus]    | CPTF_Al         | 4397483.4   | 213579.9346 | 4.85686733  |
| UIJ66452.1 | heme-dependent_peroxidase_[Bacillus_cereus]    | CPTF_Cd         | 4857314.167 | 138432.9824 | 2.849990296 |
| UIJ66452.1 | heme-dependent_peroxidase_[Bacillus_cereus]    | CPTF_Co         | 4418925.1   | 243026.9786 | 5.499685401 |
| UIJ66452.1 | heme-dependent_peroxidase_[Bacillus_cereus]    | CPTF_Cu         | 4692777.167 | 108708.3857 | 2.316504317 |
| UIJ66452.1 | heme-dependent_peroxidase_[Bacillus_cereus]    | CPTF_Fe         | 4210378.7   | 148218.1546 | 3.52030459  |
| UIJ66452.1 | heme-dependent_peroxidase_[Bacillus_cereus]    | CPTF_Mn         | 4469645.933 | 839129.0688 | 18.77394947 |
| UIJ66452.1 | heme-dependent_peroxidase_[Bacillus_cereus]    | CPTF_Ni         | 3696408.633 | 512451.1222 | 13.86348678 |
| UIJ66452.1 | heme-dependent_peroxidase_[Bacillus_cereus]    | CPTF_U          | 3797615.1   | 692527.2149 | 18.23584531 |
| UIJ66452.1 | heme-dependent_peroxidase_[Bacillus_cereus]    | CPTF_metals_mix | 7769389.4   | 260638.9986 | 3.354690892 |
| UIJ66452.1 | heme-dependent_peroxidase_[Bacillus_cereus]    | CPTF_zcontrol   | 4693809.1   | 122442.9052 | 2.608604283 |
| UIJ66453.1 | phosphate_acetyltransferase_[Bacillus_cereus]  | CPTF_Al         | 2624801.733 | 937925.7033 | 35.73320192 |
| UIJ66453.1 | phosphate_acetyltransferase_[Bacillus_cereus]  | CPTF_Cd         | 2931360.967 | 126706.2075 | 4.322436197 |
| UIJ66453.1 | phosphate_acetyltransferase_[Bacillus_cereus]  | CPTF_Co         | 2570038.633 | 210276.7762 | 8.181852734 |
| UIJ66453.1 | phosphate_acetyltransferase_[Bacillus_cereus]  | CPTF_Cu         | 2808186.667 | 138709.9571 | 4.939484925 |
| UIJ66453.1 | phosphate_acetyltransferase_[Bacillus_cereus]  | CPTF_Fe         | 2899621.333 | 455972.4365 | 15.72524078 |
| UIJ66453.1 | phosphate_acetyltransferase_[Bacillus_cereus]  | CPTF_Mn         | 2319477.667 | 276216.3376 | 11.90855776 |
| UIJ66453.1 | phosphate_acetyltransferase_[Bacillus_cereus]  | CPTF_Ni         | 2177583     | 322016.7078 | 14.78780408 |
| UIJ66453.1 | phosphate_acetyltransferase_[Bacillus_cereus]  | CPTF_U          | 2107302.333 | 414986.5139 | 19.69278481 |
| UIJ66453.1 | phosphate_acetyltransferase_[Bacillus_cereus]  | CPTF_metals_mix | 3503342.467 | 550112.8062 | 15.702513   |
| UIJ66453.1 | phosphate_acetyltransferase_[Bacillus_cereus]  | CPTF_zcontrol   | 2329250.233 | 357282.9654 | 15.33896875 |
| UIJ66461.1 | HD_domain-containing_protein_[Bacillus_cereus] | CPTF_Al         | 21241.13333 | 36790.72214 | 173.2050808 |
| UIJ66461.1 | HD_domain-containing_protein_[Bacillus_cereus] | CPTF_Cd         | 81076.86667 | 52706.56775 | 65.00814587 |
| UIJ66461.1 | HD_domain-containing_protein_[Bacillus_cereus] | CPTF_Co         | 30352.63333 | 52572.30308 | 173.2050808 |
| UIJ66461.1 | HD_domain-containing_protein_[Bacillus_cereus] | CPTF_Cu         | 31840.56667 | 55149.47921 | 173.2050808 |
| UIJ66461.1 | HD_domain-containing_protein_[Bacillus_cereus] | CPTF_Fe         | 60571.4     | 55341.62848 | 91.36593916 |
| UIJ66461.1 | HD_domain-containing_protein_[Bacillus_cereus] | CPTF_Mn         | 11923.1     | 20651.41498 | 173.2050808 |
| UIJ66461.1 | HD_domain-containing_protein_[Bacillus_cereus] | CPTF_Ni         | 18002.33333 | 31180.95599 | 173.2050808 |
| UIJ66461.1 | HD_domain-containing_protein_[Bacillus_cereus] | CPTF_U          | 0           | 0           | 0           |
| UIJ66461.1 | HD_domain-containing_protein_[Bacillus_cereus] | CPTF_metals_mix | 106440.9667 | 44074.75227 | 41.40769635 |
| UIJ66461.1 | HD_domain-containing_protein_[Bacillus_cereus] | CPTF_zcontrol   | 29881.9     | 51756.96903 | 173.2050808 |
| UIJ66462.1 | 4-oxalocrotonate_tautomerase_[Bacillus_cereus] | CPTF_Al         | 0           | 0           | 0           |
| UIJ66462.1 | 4-oxalocrotonate_tautomerase_[Bacillus_cereus] | CPTF_Cd         | 0           | 0           | 0           |
| UIJ66462.1 | 4-oxalocrotonate_tautomerase_[Bacillus_cereus] | CPTF_Co         | 0           | 0           | 0           |
| UIJ66462.1 | 4-oxalocrotonate_tautomerase_[Bacillus_cereus] | CPTF_Cu         | 0           | 0           | 0           |
| UIJ66462.1 | 4-oxalocrotonate_tautomerase_[Bacillus_cereus] | CPTF_Fe         | 0           | 0           | 0           |
| UIJ66462.1 | 4-oxalocrotonate_tautomerase_[Bacillus_cereus] | CPTF_Mn         | 0           | 0           | 0           |
| UIJ66462.1 | 4-oxalocrotonate_tautomerase_[Bacillus_cereus] | CPTF_Ni         | 41408.33333 | 71721.33719 | 173.2050808 |
| UIJ66462.1 | 4-oxalocrotonate_tautomerase_[Bacillus_cereus] | CPTF_U          | 0           | 0           | 0           |
| UIJ66462.1 | 4-oxalocrotonate_tautomerase_[Bacillus_cereus] | CPTF_metals_mix | 309767.6667 | 191353.6746 | 61.77328855 |
| UIJ66462.1 | 4-oxalocrotonate_tautomerase_[Bacillus_cereus] | CPTF_zcontrol   | 0           | 0           | 0           |
| UIJ66464.1 | YwhD_family_protein_[Bacillus_cereus]          | CPTF_Al         | 11566.6     | 20033.93887 | 173.2050808 |
| UIJ66464.1 | YwhD_family_protein_[Bacillus_cereus]          | CPTF_Cd         | 0           | 0           | 0           |
| UIJ66464.1 | YwhD_family_protein_[Bacillus_cereus]          | CPTF_Co         | 42239.73333 | 45592.45445 | 107.9373634 |
| UIJ66464.1 | YwhD_family_protein_[Bacillus_cereus]          | CPTF_Cu         | 11655.3     | 20187.57178 | 173.2050808 |
| UIJ66464.1 | YwhD_family_protein_[Bacillus_cereus]          | CPTF_Fe         | 0           | 0           | 0           |
| UIJ66464.1 | YwhD_family_protein_[Bacillus_cereus]          | CPTF_Mn         | 14985.4     | 25955.47417 | 173.2050808 |
| UIJ66464.1 | YwhD_family_protein_[Bacillus_cereus]          | CPTF_Ni         | 21927.73333 | 37979.94823 | 173.2050808 |
| UIJ66464.1 | YwhD_family_protein_[Bacillus_cereus]          | CPTF_U          | 0           | 0           | 0           |
| UIJ66464.1 | YwhD_family_protein_[Bacillus_cereus]          | CPTF_metals_mix | 350043.3333 | 53580.83489 | 15.30691483 |
| UIJ66464.1 | YwhD_family_protein_[Bacillus_cereus]          | CPTF_zcontrol   | 0           | 0           | 0           |

|            |                                                           |                 |             |             |              |
|------------|-----------------------------------------------------------|-----------------|-------------|-------------|--------------|
| UIJ66466.1 | glycerophosphodiester_phosphodiesterase [Bacillus cereus] | CPTF_Al         | 67864.33333 | 58774.66711 | 86.60612169  |
| UIJ66466.1 | glycerophosphodiester_phosphodiesterase [Bacillus cereus] | CPTF_Cd         | 232705.3333 | 212922.647  | 91.49882557  |
| UIJ66466.1 | glycerophosphodiester_phosphodiesterase [Bacillus cereus] | CPTF_Co         | 40502.6     | 14513.30255 | 35.83301455  |
| UIJ66466.1 | glycerophosphodiester_phosphodiesterase [Bacillus cereus] | CPTF_Cu         | 97065.36667 | 143067.9419 | 147.39393977 |
| UIJ66466.1 | glycerophosphodiester_phosphodiesterase [Bacillus cereus] | CPTF_Fe         | 105086.2    | 73150.36359 | 69.60986656  |
| UIJ66466.1 | glycerophosphodiester_phosphodiesterase [Bacillus cereus] | CPTF_Mn         | 96887       | 167813.2066 | 173.2050808  |
| UIJ66466.1 | glycerophosphodiester_phosphodiesterase [Bacillus cereus] | CPTF_Ni         | 0           | 0           | 0            |
| UIJ66466.1 | glycerophosphodiester_phosphodiesterase [Bacillus cereus] | CPTF_U          | 13809.96667 | 23919.56392 | 173.2050808  |
| UIJ66466.1 | glycerophosphodiester_phosphodiesterase [Bacillus cereus] | CPTF_metals_mix | 362334.3333 | 142824.8337 | 39.41796858  |
| UIJ66466.1 | glycerophosphodiester_phosphodiesterase [Bacillus cereus] | CPTF_zcontrol   | 79138.93333 | 137072.6534 | 173.2050808  |
| UIJ66469.1 | spermidine_synthase [Bacillus cereus]                     | CPTF_Al         | 2309114     | 154589.5194 | 6.694754757  |
| UIJ66469.1 | spermidine_synthase [Bacillus cereus]                     | CPTF_Cd         | 1915319.033 | 195224.6929 | 10.19280285  |
| UIJ66469.1 | spermidine_synthase [Bacillus cereus]                     | CPTF_Co         | 2305195.367 | 875176.783  | 37.96540613  |
| UIJ66469.1 | spermidine_synthase [Bacillus cereus]                     | CPTF_Cu         | 1571644     | 494146.4886 | 31.44137531  |
| UIJ66469.1 | spermidine_synthase [Bacillus cereus]                     | CPTF_Fe         | 1695935.7   | 703938.3166 | 41.50737063  |
| UIJ66469.1 | spermidine_synthase [Bacillus cereus]                     | CPTF_Mn         | 2080389.433 | 377518.9327 | 18.14655115  |
| UIJ66469.1 | spermidine_synthase [Bacillus cereus]                     | CPTF_Ni         | 2103863.333 | 385736.3893 | 18.33466952  |
| UIJ66469.1 | spermidine_synthase [Bacillus cereus]                     | CPTF_U          | 1064210.667 | 231536.8213 | 21.75667173  |
| UIJ66469.1 | spermidine_synthase [Bacillus cereus]                     | CPTF_metals_mix | 1260342     | 594541.1493 | 47.1730014   |
| UIJ66469.1 | spermidine_synthase [Bacillus cereus]                     | CPTF_zcontrol   | 1474355.467 | 287552.4863 | 19.50360634  |
| UIJ66470.1 | agmatinase [Bacillus cereus]                              | CPTF_Al         | 2699703.3   | 406249.0764 | 15.04791569  |
| UIJ66470.1 | agmatinase [Bacillus cereus]                              | CPTF_Cd         | 3089742.067 | 25779.04988 | 0.834343105  |
| UIJ66470.1 | agmatinase [Bacillus cereus]                              | CPTF_Co         | 3122184.6   | 257820.9121 | 8.25770879   |
| UIJ66470.1 | agmatinase [Bacillus cereus]                              | CPTF_Cu         | 2682397     | 345523.0109 | 12.88112874  |
| UIJ66470.1 | agmatinase [Bacillus cereus]                              | CPTF_Fe         | 2974726.667 | 117591.0235 | 3.953002635  |
| UIJ66470.1 | agmatinase [Bacillus cereus]                              | CPTF_Mn         | 2592863.9   | 444281.5519 | 17.13478104  |
| UIJ66470.1 | agmatinase [Bacillus cereus]                              | CPTF_Ni         | 1883210.967 | 376819.8595 | 20.00943421  |
| UIJ66470.1 | agmatinase [Bacillus cereus]                              | CPTF_U          | 2572714.133 | 435241.3003 | 16.91759277  |
| UIJ66470.1 | agmatinase [Bacillus cereus]                              | CPTF_metals_mix | 2477442.733 | 499928.3535 | 20.17920926  |
| UIJ66470.1 | agmatinase [Bacillus cereus]                              | CPTF_zcontrol   | 2782812.5   | 350453.1306 | 12.59348701  |
| UIJ66475.1 | arginine--tRNA_ligase [Bacillus cereus]                   | CPTF_Al         | 1829647.833 | 272262.26   | 14.88058276  |
| UIJ66475.1 | arginine--tRNA_ligase [Bacillus cereus]                   | CPTF_Cd         | 1701660.1   | 26339.34202 | 1.547861528  |
| UIJ66475.1 | arginine--tRNA_ligase [Bacillus cereus]                   | CPTF_Co         | 2038006.633 | 272556.6342 | 13.37368729  |
| UIJ66475.1 | arginine--tRNA_ligase [Bacillus cereus]                   | CPTF_Cu         | 1822010.233 | 139961.5852 | 7.681712353  |
| UIJ66475.1 | arginine--tRNA_ligase [Bacillus cereus]                   | CPTF_Fe         | 1938951.633 | 268844.2065 | 13.86544161  |
| UIJ66475.1 | arginine--tRNA_ligase [Bacillus cereus]                   | CPTF_Mn         | 1998672.833 | 209077.0042 | 10.46079182  |
| UIJ66475.1 | arginine--tRNA_ligase [Bacillus cereus]                   | CPTF_Ni         | 1892498.433 | 56435.5663  | 2.982066738  |
| UIJ66475.1 | arginine--tRNA_ligase [Bacillus cereus]                   | CPTF_U          | 1728213.833 | 443809.1574 | 25.68022248  |
| UIJ66475.1 | arginine--tRNA_ligase [Bacillus cereus]                   | CPTF_metals_mix | 1614005.933 | 180894.787  | 11.20781425  |
| UIJ66475.1 | arginine--tRNA_ligase [Bacillus cereus]                   | CPTF_zcontrol   | 1823498.933 | 363727.116  | 19.9466591   |
| UIJ66480.1 | type_I_methionyl_aminopeptidase [Bacillus cereus]         | CPTF_Al         | 914566.0333 | 185098.5601 | 20.23894977  |
| UIJ66480.1 | type_I_methionyl_aminopeptidase [Bacillus cereus]         | CPTF_Cd         | 919633.3    | 32508.46632 | 3.534937928  |
| UIJ66480.1 | type_I_methionyl_aminopeptidase [Bacillus cereus]         | CPTF_Co         | 856384.3333 | 74294.32148 | 8.675348041  |
| UIJ66480.1 | type_I_methionyl_aminopeptidase [Bacillus cereus]         | CPTF_Cu         | 1011511.1   | 68538.28919 | 6.775831644  |
| UIJ66480.1 | type_I_methionyl_aminopeptidase [Bacillus cereus]         | CPTF_Fe         | 934743.4333 | 127879.5822 | 13.68071469  |
| UIJ66480.1 | type_I_methionyl_aminopeptidase [Bacillus cereus]         | CPTF_Mn         | 878228.3333 | 203784.3587 | 23.20402918  |
| UIJ66480.1 | type_I_methionyl_aminopeptidase [Bacillus cereus]         | CPTF_Ni         | 995600.8333 | 122238.4087 | 12.27785319  |
| UIJ66480.1 | type_I_methionyl_aminopeptidase [Bacillus cereus]         | CPTF_U          | 1149713.767 | 199038.796  | 17.31203033  |
| UIJ66480.1 | type_I_methionyl_aminopeptidase [Bacillus cereus]         | CPTF_metals_mix | 865657.7667 | 158229.5509 | 18.27853419  |
| UIJ66480.1 | type_I_methionyl_aminopeptidase [Bacillus cereus]         | CPTF_zcontrol   | 851330.3333 | 184246.5896 | 21.64219721  |
| UIJ66491.1 | acetyl-CoA_C-acetyltransferase [Bacillus cereus]          | CPTF_Al         | 742822.8333 | 351341.8335 | 47.29820056  |
| UIJ66491.1 | acetyl-CoA_C-acetyltransferase [Bacillus cereus]          | CPTF_Cd         | 1173902.433 | 234971.6509 | 20.01628451  |
| UIJ66491.1 | acetyl-CoA_C-acetyltransferase [Bacillus cereus]          | CPTF_Co         | 686625.3    | 159462.1253 | 23.22403869  |
| UIJ66491.1 | acetyl-CoA_C-acetyltransferase [Bacillus cereus]          | CPTF_Cu         | 638754      | 76575.23484 | 11.98822001  |
| UIJ66491.1 | acetyl-CoA_C-acetyltransferase [Bacillus cereus]          | CPTF_Fe         | 733402.2667 | 166491.9978 | 22.70132033  |
| UIJ66491.1 | acetyl-CoA_C-acetyltransferase [Bacillus cereus]          | CPTF_Mn         | 695356.1667 | 182885.8541 | 26.3010329   |
| UIJ66491.1 | acetyl-CoA_C-acetyltransferase [Bacillus cereus]          | CPTF_Ni         | 304713.0667 | 192248.2468 | 63.09156641  |
| UIJ66491.1 | acetyl-CoA_C-acetyltransferase [Bacillus cereus]          | CPTF_U          | 480496      | 210269.6073 | 43.76094853  |
| UIJ66491.1 | acetyl-CoA_C-acetyltransferase [Bacillus cereus]          | CPTF_metals_mix | 1087607.067 | 137711.6534 | 12.66189395  |
| UIJ66491.1 | acetyl-CoA_C-acetyltransferase [Bacillus cereus]          | CPTF_zcontrol   | 570312.1667 | 128552.515  | 22.54072813  |
| UIJ66492.1 | 3-hydroxybutyryl-CoA_dehydrogenase [Bacillus cereus]      | CPTF_Al         | 1353538     | 92091.55131 | 6.803765488  |



|            |                                                                   |                 |             |             |              |
|------------|-------------------------------------------------------------------|-----------------|-------------|-------------|--------------|
| UIJ66492.1 | 3-hydroxybutyryl-CoA_dehydrogenase_[Bacillus_cereus]              | CPTF_Cd         | 1295946.5   | 63532.35978 | 4.90239063   |
| UIJ66492.1 | 3-hydroxybutyryl-CoA_dehydrogenase_[Bacillus_cereus]              | CPTF_Co         | 1201552     | 104103.71   | 8.664103596  |
| UIJ66492.1 | 3-hydroxybutyryl-CoA_dehydrogenase_[Bacillus_cereus]              | CPTF_Cu         | 1299950.667 | 141357.0714 | 10.87704575  |
| UIJ66492.1 | 3-hydroxybutyryl-CoA_dehydrogenase_[Bacillus_cereus]              | CPTF_Fe         | 1267969.6   | 243431.4487 | 19.19852406  |
| UIJ66492.1 | 3-hydroxybutyryl-CoA_dehydrogenase_[Bacillus_cereus]              | CPTF_Mn         | 1255740.333 | 126542.8503 | 10.07715106  |
| UIJ66492.1 | 3-hydroxybutyryl-CoA_dehydrogenase_[Bacillus_cereus]              | CPTF_Ni         | 1392152.333 | 321086.8736 | 23.06406174  |
| UIJ66492.1 | 3-hydroxybutyryl-CoA_dehydrogenase_[Bacillus_cereus]              | CPTF_U          | 1360565.8   | 440469.7446 | 32.37401268  |
| UIJ66492.1 | 3-hydroxybutyryl-CoA_dehydrogenase_[Bacillus_cereus]              | CPTF_metals_mix | 1158217.667 | 108245.4051 | 9.345860304  |
| UIJ66492.1 | 3-hydroxybutyryl-CoA_dehydrogenase_[Bacillus_cereus]              | CPTF_zcontrol   | 1325470.667 | 129499.6797 | 9.770090203  |
| UIJ66493.1 | acyl-CoA_dehydrogenase_[Bacillus_cereus]                          | CPTF_Al         | 224786      | 87497.86808 | 38.92496334  |
| UIJ66493.1 | acyl-CoA_dehydrogenase_[Bacillus_cereus]                          | CPTF_Cd         | 246874.3333 | 31351.85832 | 12.69952121  |
| UIJ66493.1 | acyl-CoA_dehydrogenase_[Bacillus_cereus]                          | CPTF_Co         | 114654.4667 | 80258.95969 | 70.00072655  |
| UIJ66493.1 | acyl-CoA_dehydrogenase_[Bacillus_cereus]                          | CPTF_Cu         | 115631.4    | 45427.16512 | 39.28618448  |
| UIJ66493.1 | acyl-CoA_dehydrogenase_[Bacillus_cereus]                          | CPTF_Fe         | 124371.2333 | 62605.01791 | 50.33721724  |
| UIJ66493.1 | acyl-CoA_dehydrogenase_[Bacillus_cereus]                          | CPTF_Mn         | 92169.03333 | 107569.8147 | 116.7092794  |
| UIJ66493.1 | acyl-CoA_dehydrogenase_[Bacillus_cereus]                          | CPTF_Ni         | 211693.3333 | 66485.37534 | 31.40645683  |
| UIJ66493.1 | acyl-CoA_dehydrogenase_[Bacillus_cereus]                          | CPTF_U          | 244375.6667 | 81278.79713 | 33.2597751   |
| UIJ66493.1 | acyl-CoA_dehydrogenase_[Bacillus_cereus]                          | CPTF_metals_mix | 159192.5333 | 51309.51659 | 32.23110753  |
| UIJ66493.1 | acyl-CoA_dehydrogenase_[Bacillus_cereus]                          | CPTF_zcontrol   | 226306.6667 | 45994.84735 | 20.32412391  |
| UIJ66494.1 | acyl-CoA_dehydrogenase_AcDA_[Bacillus_cereus]                     | CPTF_Al         | 184107.3333 | 236027.7902 | 128.2011889  |
| UIJ66494.1 | acyl-CoA_dehydrogenase_AcDA_[Bacillus_cereus]                     | CPTF_Cd         | 431150      | 165334.8636 | 38.34741125  |
| UIJ66494.1 | acyl-CoA_dehydrogenase_AcDA_[Bacillus_cereus]                     | CPTF_Co         | 273791      | 49577.11984 | 18.1076514   |
| UIJ66494.1 | acyl-CoA_dehydrogenase_AcDA_[Bacillus_cereus]                     | CPTF_Cu         | 232555.9333 | 92417.09058 | 39.73972595  |
| UIJ66494.1 | acyl-CoA_dehydrogenase_AcDA_[Bacillus_cereus]                     | CPTF_Fe         | 203049.3333 | 351691.7618 | 173.20508008 |
| UIJ66494.1 | acyl-CoA_dehydrogenase_AcDA_[Bacillus_cereus]                     | CPTF_Mn         | 174140      | 151024.893  | 86.72613586  |
| UIJ66494.1 | acyl-CoA_dehydrogenase_AcDA_[Bacillus_cereus]                     | CPTF_Ni         | 282418.8333 | 138502.9552 | 49.0416852   |
| UIJ66494.1 | acyl-CoA_dehydrogenase_AcDA_[Bacillus_cereus]                     | CPTF_U          | 267200      | 234751.2666 | 87.85601295  |
| UIJ66494.1 | acyl-CoA_dehydrogenase_AcDA_[Bacillus_cereus]                     | CPTF_metals_mix | 380221.9667 | 49623.68962 | 13.05124216  |
| UIJ66494.1 | acyl-CoA_dehydrogenase_AcDA_[Bacillus_cereus]                     | CPTF_zcontrol   | 141876.5333 | 137505.0967 | 96.91884451  |
| UIJ66496.1 | DNA-directed_RNA_polymerase_subunit_delta_[Bacillus_cereus]       | CPTF_Al         | 1257041     | 374802.7042 | 29.81626726  |
| UIJ66496.1 | DNA-directed_RNA_polymerase_subunit_delta_[Bacillus_cereus]       | CPTF_Cd         | 1470000     | 235796.5225 | 16.04057976  |
| UIJ66496.1 | DNA-directed_RNA_polymerase_subunit_delta_[Bacillus_cereus]       | CPTF_Co         | 1069225     | 389338.9231 | 36.41318928  |
| UIJ66496.1 | DNA-directed_RNA_polymerase_subunit_delta_[Bacillus_cereus]       | CPTF_Cu         | 830520.3333 | 75825.92342 | 9.129929801  |
| UIJ66496.1 | DNA-directed_RNA_polymerase_subunit_delta_[Bacillus_cereus]       | CPTF_Fe         | 1486666.667 | 1302932.59  | 87.64120559  |
| UIJ66496.1 | DNA-directed_RNA_polymerase_subunit_delta_[Bacillus_cereus]       | CPTF_Mn         | 1796044.033 | 1072507.153 | 59.71496984  |
| UIJ66496.1 | DNA-directed_RNA_polymerase_subunit_delta_[Bacillus_cereus]       | CPTF_Ni         | 0           | 0           | 0            |
| UIJ66496.1 | DNA-directed_RNA_polymerase_subunit_delta_[Bacillus_cereus]       | CPTF_U          | 0           | 0           | 0            |
| UIJ66496.1 | DNA-directed_RNA_polymerase_subunit_delta_[Bacillus_cereus]       | CPTF_metals_mix | 2538683.7   | 593040.9352 | 23.36017422  |
| UIJ66496.1 | DNA-directed_RNA_polymerase_subunit_delta_[Bacillus_cereus]       | CPTF_zcontrol   | 1458086.667 | 706937.3257 | 48.48390304  |
| UIJ66497.1 | CTP_synthase_[Bacillus_cereus]                                    | CPTF_Al         | 7107683.4   | 197455.5735 | 2.778058087  |
| UIJ66497.1 | CTP_synthase_[Bacillus_cereus]                                    | CPTF_Cd         | 7335200.033 | 329119.3798 | 4.486849415  |
| UIJ66497.1 | CTP_synthase_[Bacillus_cereus]                                    | CPTF_Co         | 7993005.3   | 591403.3257 | 7.399010804  |
| UIJ66497.1 | CTP_synthase_[Bacillus_cereus]                                    | CPTF_Cu         | 6771122.333 | 485825.1756 | 7.174957883  |
| UIJ66497.1 | CTP_synthase_[Bacillus_cereus]                                    | CPTF_Fe         | 7390078.833 | 189316.1636 | 2.561761083  |
| UIJ66497.1 | CTP_synthase_[Bacillus_cereus]                                    | CPTF_Mn         | 7433602.2   | 952958.0128 | 12.81959926  |
| UIJ66497.1 | CTP_synthase_[Bacillus_cereus]                                    | CPTF_Ni         | 7763217.933 | 621566.2746 | 8.006554498  |
| UIJ66497.1 | CTP_synthase_[Bacillus_cereus]                                    | CPTF_U          | 8244783.7   | 336379.4776 | 4.07990664   |
| UIJ66497.1 | CTP_synthase_[Bacillus_cereus]                                    | CPTF_metals_mix | 4697151.233 | 413307.3726 | 8.799107205  |
| UIJ66497.1 | CTP_synthase_[Bacillus_cereus]                                    | CPTF_zcontrol   | 8262506.1   | 125140.557  | 1.51455933   |
| UIJ66499.1 | sporulation_initiation_phosphotransferase_Spo0F_[Bacillus_cereus] | CPTF_Al         | 1253333.333 | 56862.40703 | 4.536894178  |
| UIJ66499.1 | sporulation_initiation_phosphotransferase_Spo0F_[Bacillus_cereus] | CPTF_Cd         | 1458042.333 | 447054.2891 | 30.66126949  |
| UIJ66499.1 | sporulation_initiation_phosphotransferase_Spo0F_[Bacillus_cereus] | CPTF_Co         | 1618772.667 | 495788.0384 | 30.62740363  |
| UIJ66499.1 | sporulation_initiation_phosphotransferase_Spo0F_[Bacillus_cereus] | CPTF_Cu         | 1679072.667 | 341266.031  | 20.32467312  |
| UIJ66499.1 | sporulation_initiation_phosphotransferase_Spo0F_[Bacillus_cereus] | CPTF_Fe         | 1778869.333 | 416545.9542 | 23.4163323   |
| UIJ66499.1 | sporulation_initiation_phosphotransferase_Spo0F_[Bacillus_cereus] | CPTF_Mn         | 1484003.667 | 431315.984  | 29.06434759  |
| UIJ66499.1 | sporulation_initiation_phosphotransferase_Spo0F_[Bacillus_cereus] | CPTF_Ni         | 1662989.333 | 361944.3166 | 21.76468059  |
| UIJ66499.1 | sporulation_initiation_phosphotransferase_Spo0F_[Bacillus_cereus] | CPTF_U          | 1253333.333 | 50332.22957 | 4.01586938   |
| UIJ66499.1 | sporulation_initiation_phosphotransferase_Spo0F_[Bacillus_cereus] | CPTF_metals_mix | 2528254.767 | 630213.4375 | 24.92681694  |
| UIJ66499.1 | sporulation_initiation_phosphotransferase_Spo0F_[Bacillus_cereus] | CPTF_zcontrol   | 2119994.333 | 79707.81215 | 3.75981251   |
| UIJ66500.1 | fructose-bisphosphate_aldolase_[Bacillus_cereus]                  | CPTF_Al         | 26920943.17 | 2604015.009 | 9.672822354  |
| UIJ66500.1 | fructose-bisphosphate_aldolase_[Bacillus_cereus]                  | CPTF_Cd         | 25869773.13 | 2290515.242 | 8.854021371  |

|            |                                                                                 |                 |             |             |             |
|------------|---------------------------------------------------------------------------------|-----------------|-------------|-------------|-------------|
| UIJ66500.1 | fructose-bisphosphate_aldolase [Bacillus cereus]                                | CPTF_Co         | 26557471.37 | 1300277.08  | 4.896087667 |
| UIJ66500.1 | fructose-bisphosphate_aldolase [Bacillus cereus]                                | CPTF_Cu         | 24623008.63 | 2611718.533 | 10.60682133 |
| UIJ66500.1 | fructose-bisphosphate_aldolase [Bacillus cereus]                                | CPTF_Fe         | 23145827.47 | 708235.7868 | 3.059885363 |
| UIJ66500.1 | fructose-bisphosphate_aldolase [Bacillus cereus]                                | CPTF_Mn         | 25808610.27 | 4466523.706 | 17.30633172 |
| UIJ66500.1 | fructose-bisphosphate_aldolase [Bacillus cereus]                                | CPTF_Ni         | 22447662.27 | 3988011.567 | 17.76582131 |
| UIJ66500.1 | fructose-bisphosphate_aldolase [Bacillus cereus]                                | CPTF_U          | 17751673.63 | 2811937.313 | 15.84040678 |
| UIJ66500.1 | fructose-bisphosphate_aldolase [Bacillus cereus]                                | CPTF_metals_mix | 31496005.33 | 1398506.014 | 4.440264722 |
| UIJ66500.1 | fructose-bisphosphate_aldolase [Bacillus cereus]                                | CPTF_zcontrol   | 23858768.43 | 810178.488  | 3.395726356 |
| UIJ66502.1 | class_II_fructose-bisphosphatase [Bacillus cereus]                              | CPTF_Al         | 9600490.2   | 834337.8543 | 8.690575553 |
| UIJ66502.1 | class_II_fructose-bisphosphatase [Bacillus cereus]                              | CPTF_Cd         | 8103064.767 | 497799.8725 | 6.143353001 |
| UIJ66502.1 | class_II_fructose-bisphosphatase [Bacillus cereus]                              | CPTF_Co         | 8373359.567 | 664595.6695 | 7.937025327 |
| UIJ66502.1 | class_II_fructose-bisphosphatase [Bacillus cereus]                              | CPTF_Cu         | 8246881.8   | 342052.2562 | 4.147655617 |
| UIJ66502.1 | class_II_fructose-bisphosphatase [Bacillus cereus]                              | CPTF_Fe         | 8477001.2   | 602766.7717 | 7.110613264 |
| UIJ66502.1 | class_II_fructose-bisphosphatase [Bacillus cereus]                              | CPTF_Mn         | 8933372.333 | 1453666.24  | 16.27231225 |
| UIJ66502.1 | class_II_fructose-bisphosphatase [Bacillus cereus]                              | CPTF_Ni         | 8912700.967 | 289291.4288 | 3.245833445 |
| UIJ66502.1 | class_II_fructose-bisphosphatase [Bacillus cereus]                              | CPTF_U          | 8725849     | 288677.7758 | 3.308305883 |
| UIJ66502.1 | class_II_fructose-bisphosphatase [Bacillus cereus]                              | CPTF_metals_mix | 7430899.157 | 977308.7474 | 13.15195815 |
| UIJ66502.1 | class_II_fructose-bisphosphatase [Bacillus cereus]                              | CPTF_zcontrol   | 9243665.933 | 319884.6033 | 3.460581609 |
| UIJ66503.1 | transcription_termination_factor_Rho [Bacillus cereus]                          | CPTF_Al         | 2171033.4   | 328719.7355 | 15.14116436 |
| UIJ66503.1 | transcription_termination_factor_Rho [Bacillus cereus]                          | CPTF_Cd         | 2527640.867 | 425955.4801 | 16.85189877 |
| UIJ66503.1 | transcription_termination_factor_Rho [Bacillus cereus]                          | CPTF_Co         | 2436019.833 | 52512.55959 | 2.155670445 |
| UIJ66503.1 | transcription_termination_factor_Rho [Bacillus cereus]                          | CPTF_Cu         | 2168772.4   | 174869.7603 | 8.063075697 |
| UIJ66503.1 | transcription_termination_factor_Rho [Bacillus cereus]                          | CPTF_Fe         | 2114708.467 | 156320.9769 | 7.392081666 |
| UIJ66503.1 | transcription_termination_factor_Rho [Bacillus cereus]                          | CPTF_Mn         | 2035028.933 | 319975.1622 | 15.72337164 |
| UIJ66503.1 | transcription_termination_factor_Rho [Bacillus cereus]                          | CPTF_Ni         | 1509037.5   | 193985.5569 | 12.85491957 |
| UIJ66503.1 | transcription_termination_factor_Rho [Bacillus cereus]                          | CPTF_U          | 1409618.667 | 279501.7975 | 19.82818503 |
| UIJ66503.1 | transcription_termination_factor_Rho [Bacillus cereus]                          | CPTF_metals_mix | 2296586.9   | 19707.23868 | 0.858109862 |
| UIJ66503.1 | transcription_termination_factor_Rho [Bacillus cereus]                          | CPTF_zcontrol   | 1962922.233 | 321057.9117 | 16.35611978 |
| UIJ66504.1 | type_B_50S_ribosomal_protein_L31 [Bacillus cereus]                              | CPTF_Al         | 780467      | 144677.3081 | 18.53727424 |
| UIJ66504.1 | type_B_50S_ribosomal_protein_L31 [Bacillus cereus]                              | CPTF_Cd         | 1127226.367 | 369499.7442 | 32.77955122 |
| UIJ66504.1 | type_B_50S_ribosomal_protein_L31 [Bacillus cereus]                              | CPTF_Co         | 787181.5    | 67960.54574 | 8.633402302 |
| UIJ66504.1 | type_B_50S_ribosomal_protein_L31 [Bacillus cereus]                              | CPTF_Cu         | 787733      | 199382.2794 | 25.31089587 |
| UIJ66504.1 | type_B_50S_ribosomal_protein_L31 [Bacillus cereus]                              | CPTF_Fe         | 848572.9    | 261216.5507 | 30.78304182 |
| UIJ66504.1 | type_B_50S_ribosomal_protein_L31 [Bacillus cereus]                              | CPTF_Mn         | 1387542.567 | 1332698.326 | 96.04738321 |
| UIJ66504.1 | type_B_50S_ribosomal_protein_L31 [Bacillus cereus]                              | CPTF_Ni         | 378335.2333 | 121730.0488 | 32.17518171 |
| UIJ66504.1 | type_B_50S_ribosomal_protein_L31 [Bacillus cereus]                              | CPTF_U          | 622240.9    | 289327.5681 | 46.49767768 |
| UIJ66504.1 | type_B_50S_ribosomal_protein_L31 [Bacillus cereus]                              | CPTF_metals_mix | 6217740.667 | 1090609.746 | 17.54029003 |
| UIJ66504.1 | type_B_50S_ribosomal_protein_L31 [Bacillus cereus]                              | CPTF_zcontrol   | 567365.2333 | 243690.3325 | 42.95122756 |
| UIJ66506.1 | peptide_chain_release_factor_N(5)-glutamine_methyltransferase [Bacillus cereus] | CPTF_Al         | 15876.3     | 27498.55824 | 173.2050808 |
| UIJ66506.1 | peptide_chain_release_factor_N(5)-glutamine_methyltransferase [Bacillus cereus] | CPTF_Cd         | 35192.5     | 5380.287839 | 15.28816606 |
| UIJ66506.1 | peptide_chain_release_factor_N(5)-glutamine_methyltransferase [Bacillus cereus] | CPTF_Co         | 19315.26667 | 22021.50121 | 114.0108578 |
| UIJ66506.1 | peptide_chain_release_factor_N(5)-glutamine_methyltransferase [Bacillus cereus] | CPTF_Cu         | 16634.13333 | 14771.81441 | 88.80423233 |
| UIJ66506.1 | peptide_chain_release_factor_N(5)-glutamine_methyltransferase [Bacillus cereus] | CPTF_Fe         | 15179.7     | 14195.19882 | 93.51435679 |
| UIJ66506.1 | peptide_chain_release_factor_N(5)-glutamine_methyltransferase [Bacillus cereus] | CPTF_Mn         | 7517.9      | 13021.38477 | 173.2050808 |
| UIJ66506.1 | peptide_chain_release_factor_N(5)-glutamine_methyltransferase [Bacillus cereus] | CPTF_Ni         | 0           | 0           | 0           |
| UIJ66506.1 | peptide_chain_release_factor_N(5)-glutamine_methyltransferase [Bacillus cereus] | CPTF_U          | 0           | 0           | 0           |
| UIJ66506.1 | peptide_chain_release_factor_N(5)-glutamine_methyltransferase [Bacillus cereus] | CPTF_metals_mix | 29141.43333 | 26833.8967  | 92.08159527 |
| UIJ66506.1 | peptide_chain_release_factor_N(5)-glutamine_methyltransferase [Bacillus cereus] | CPTF_zcontrol   | 7009.8      | 12141.32975 | 173.2050808 |
| UIJ66509.1 | threonylcarbamoyl-AMP_synthase [Bacillus cereus]                                | CPTF_Al         | 169699      | 147098.381  | 86.68193741 |
| UIJ66509.1 | threonylcarbamoyl-AMP_synthase [Bacillus cereus]                                | CPTF_Cd         | 282123.3333 | 58368.87124 | 20.68913285 |
| UIJ66509.1 | threonylcarbamoyl-AMP_synthase [Bacillus cereus]                                | CPTF_Co         | 198880      | 28880.47278 | 14.52155711 |
| UIJ66509.1 | threonylcarbamoyl-AMP_synthase [Bacillus cereus]                                | CPTF_Cu         | 85695.93333 | 98194.1465  | 114.5843714 |
| UIJ66509.1 | threonylcarbamoyl-AMP_synthase [Bacillus cereus]                                | CPTF_Fe         | 133662.6667 | 116246.9085 | 86.97036461 |
| UIJ66509.1 | threonylcarbamoyl-AMP_synthase [Bacillus cereus]                                | CPTF_Mn         | 86620.66667 | 150031.3957 | 173.2050808 |
| UIJ66509.1 | threonylcarbamoyl-AMP_synthase [Bacillus cereus]                                | CPTF_Ni         | 253646      | 2264.977042 | 0.892967775 |
| UIJ66509.1 | threonylcarbamoyl-AMP_synthase [Bacillus cereus]                                | CPTF_U          | 191102      | 94891.23852 | 49.65475951 |
| UIJ66509.1 | threonylcarbamoyl-AMP_synthase [Bacillus cereus]                                | CPTF_metals_mix | 0           | 0           | 0           |
| UIJ66509.1 | threonylcarbamoyl-AMP_synthase [Bacillus cereus]                                | CPTF_zcontrol   | 198724.3333 | 11733.6806  | 5.904501175 |
| UIJ66512.1 | flavin_reductase_family_protein [Bacillus cereus]                               | CPTF_Al         | 502389.6333 | 63834.23362 | 12.70612078 |
| UIJ66512.1 | flavin_reductase_family_protein [Bacillus cereus]                               | CPTF_Cd         | 727495.6667 | 109213.5729 | 15.01226439 |
| UIJ66512.1 | flavin_reductase_family_protein [Bacillus cereus]                               | CPTF_Co         | 493358.9333 | 21504.61301 | 4.358816991 |

|            |                                                                     |                 |             |             |             |
|------------|---------------------------------------------------------------------|-----------------|-------------|-------------|-------------|
| UIJ66512.1 | flavin_reductase_family_protein_[Bacillus_cereus]                   | CPTF_Cu         | 265924      | 48934.18828 | 18.40156897 |
| UIJ66512.1 | flavin_reductase_family_protein_[Bacillus_cereus]                   | CPTF_Fe         | 553750.6    | 81579.24701 | 14.73212797 |
| UIJ66512.1 | flavin_reductase_family_protein_[Bacillus_cereus]                   | CPTF_Mn         | 595878      | 209666.6905 | 35.18617745 |
| UIJ66512.1 | flavin_reductase_family_protein_[Bacillus_cereus]                   | CPTF_Ni         | 562157.7333 | 12547.7756  | 2.232073821 |
| UIJ66512.1 | flavin_reductase_family_protein_[Bacillus_cereus]                   | CPTF_U          | 256330.6667 | 35234.82746 | 13.74584942 |
| UIJ66512.1 | flavin_reductase_family_protein_[Bacillus_cereus]                   | CPTF_metals_mix | 1021842.3   | 240119.0334 | 23.49863902 |
| UIJ66512.1 | flavin_reductase_family_protein_[Bacillus_cereus]                   | CPTF_zcontrol   | 430590      | 20788.63783 | 4.827942552 |
| UIJ66514.1 | PTS_glucose_transporter_subunit_IIA_[Bacillus_cereus]               | CPTF_Al         | 4066836.333 | 42801.81512 | 1.05245974  |
| UIJ66514.1 | PTS_glucose_transporter_subunit_IIA_[Bacillus_cereus]               | CPTF_Cd         | 4303282.333 | 121046.2061 | 2.812880883 |
| UIJ66514.1 | PTS_glucose_transporter_subunit_IIA_[Bacillus_cereus]               | CPTF_Co         | 3856014     | 154460.3344 | 4.005699522 |
| UIJ66514.1 | PTS_glucose_transporter_subunit_IIA_[Bacillus_cereus]               | CPTF_Cu         | 3965450.8   | 182005.2611 | 4.58977479  |
| UIJ66514.1 | PTS_glucose_transporter_subunit_IIA_[Bacillus_cereus]               | CPTF_Fe         | 4052697.667 | 227180.1895 | 5.605653522 |
| UIJ66514.1 | PTS_glucose_transporter_subunit_IIA_[Bacillus_cereus]               | CPTF_Mn         | 3971310     | 345419.1459 | 8.697864078 |
| UIJ66514.1 | PTS_glucose_transporter_subunit_IIA_[Bacillus_cereus]               | CPTF_Ni         | 3859690.333 | 113441.8058 | 2.939142676 |
| UIJ66514.1 | PTS_glucose_transporter_subunit_IIA_[Bacillus_cereus]               | CPTF_U          | 4430563.333 | 350630.9218 | 7.913912868 |
| UIJ66514.1 | PTS_glucose_transporter_subunit_IIA_[Bacillus_cereus]               | CPTF_metals_mix | 3766073     | 31620.74996 | 0.83962127  |
| UIJ66514.1 | PTS_glucose_transporter_subunit_IIA_[Bacillus_cereus]               | CPTF_zcontrol   | 4097005     | 141299.1081 | 3.448839044 |
| UIJ66515.1 | low_molecular_weight_protein_arginine_phosphatase_[Bacillus_cereus] | CPTF_Al         | 0           | 0           | 0           |
| UIJ66515.1 | low_molecular_weight_protein_arginine_phosphatase_[Bacillus_cereus] | CPTF_Cd         | 0           | 0           | 0           |
| UIJ66515.1 | low_molecular_weight_protein_arginine_phosphatase_[Bacillus_cereus] | CPTF_Co         | 0           | 0           | 0           |
| UIJ66515.1 | low_molecular_weight_protein_arginine_phosphatase_[Bacillus_cereus] | CPTF_Cu         | 0           | 0           | 0           |
| UIJ66515.1 | low_molecular_weight_protein_arginine_phosphatase_[Bacillus_cereus] | CPTF_Fe         | 0           | 0           | 0           |
| UIJ66515.1 | low_molecular_weight_protein_arginine_phosphatase_[Bacillus_cereus] | CPTF_Mn         | 0           | 0           | 0           |
| UIJ66515.1 | low_molecular_weight_protein_arginine_phosphatase_[Bacillus_cereus] | CPTF_Ni         | 0           | 0           | 0           |
| UIJ66515.1 | low_molecular_weight_protein_arginine_phosphatase_[Bacillus_cereus] | CPTF_U          | 0           | 0           | 0           |
| UIJ66515.1 | low_molecular_weight_protein_arginine_phosphatase_[Bacillus_cereus] | CPTF_metals_mix | 36925.3     | 12206.10349 | 33.0562067  |
| UIJ66515.1 | low_molecular_weight_protein_arginine_phosphatase_[Bacillus_cereus] | CPTF_zcontrol   | 0           | 0           | 0           |
| UIJ66516.1 | ribose_5-phosphate_isomerase_B_[Bacillus_cereus]                    | CPTF_Al         | 21842.06667 | 19099.10938 | 87.44186012 |
| UIJ66516.1 | ribose_5-phosphate_isomerase_B_[Bacillus_cereus]                    | CPTF_Cd         | 30797.2     | 30307.3424  | 98.40940863 |
| UIJ66516.1 | ribose_5-phosphate_isomerase_B_[Bacillus_cereus]                    | CPTF_Co         | 52546.56667 | 27280.83595 | 51.91744709 |
| UIJ66516.1 | ribose_5-phosphate_isomerase_B_[Bacillus_cereus]                    | CPTF_Cu         | 36957.63333 | 37030.81566 | 100.1980168 |
| UIJ66516.1 | ribose_5-phosphate_isomerase_B_[Bacillus_cereus]                    | CPTF_Fe         | 23501       | 40704.92603 | 173.2050808 |
| UIJ66516.1 | ribose_5-phosphate_isomerase_B_[Bacillus_cereus]                    | CPTF_Mn         | 0           | 0           | 0           |
| UIJ66516.1 | ribose_5-phosphate_isomerase_B_[Bacillus_cereus]                    | CPTF_Ni         | 0           | 0           | 0           |
| UIJ66516.1 | ribose_5-phosphate_isomerase_B_[Bacillus_cereus]                    | CPTF_U          | 11353.36667 | 19664.6079  | 173.2050808 |
| UIJ66516.1 | ribose_5-phosphate_isomerase_B_[Bacillus_cereus]                    | CPTF_metals_mix | 496394.3    | 459660.825  | 92.5999402  |
| UIJ66516.1 | ribose_5-phosphate_isomerase_B_[Bacillus_cereus]                    | CPTF_zcontrol   | 0           | 0           | 0           |
| UIJ66517.1 | TIGR01440_family_protein_[Bacillus_cereus]                          | CPTF_Al         | 929218.9333 | 35718.07931 | 3.843881999 |
| UIJ66517.1 | TIGR01440_family_protein_[Bacillus_cereus]                          | CPTF_Cd         | 1013648.867 | 93562.67876 | 9.230284948 |
| UIJ66517.1 | TIGR01440_family_protein_[Bacillus_cereus]                          | CPTF_Co         | 896590.2    | 25392.00828 | 2.832064    |
| UIJ66517.1 | TIGR01440_family_protein_[Bacillus_cereus]                          | CPTF_Cu         | 984724.1667 | 195694.8467 | 19.87306225 |
| UIJ66517.1 | TIGR01440_family_protein_[Bacillus_cereus]                          | CPTF_Fe         | 747820.8333 | 658342.2334 | 88.03475433 |
| UIJ66517.1 | TIGR01440_family_protein_[Bacillus_cereus]                          | CPTF_Mn         | 1033184.233 | 103860.1594 | 10.05243363 |
| UIJ66517.1 | TIGR01440_family_protein_[Bacillus_cereus]                          | CPTF_Ni         | 1204057.667 | 242983.4438 | 20.1803826  |
| UIJ66517.1 | TIGR01440_family_protein_[Bacillus_cereus]                          | CPTF_U          | 1003465.667 | 126961.1143 | 12.6522629  |
| UIJ66517.1 | TIGR01440_family_protein_[Bacillus_cereus]                          | CPTF_metals_mix | 756402.8    | 326821.3093 | 43.20731088 |
| UIJ66517.1 | TIGR01440_family_protein_[Bacillus_cereus]                          | CPTF_zcontrol   | 1199323.833 | 164069.5176 | 13.68016819 |
| UIJ66518.1 | serine_hydroxymethyltransferase_[Bacillus_cereus]                   | CPTF_Al         | 13711236.77 | 742581.5153 | 5.415860932 |
| UIJ66518.1 | serine_hydroxymethyltransferase_[Bacillus_cereus]                   | CPTF_Cd         | 14838611    | 415292.5538 | 2.7987293   |
| UIJ66518.1 | serine_hydroxymethyltransferase_[Bacillus_cereus]                   | CPTF_Co         | 13222142.5  | 1052157.828 | 7.957544155 |
| UIJ66518.1 | serine_hydroxymethyltransferase_[Bacillus_cereus]                   | CPTF_Cu         | 10702818.7  | 396208.0721 | 3.701903986 |
| UIJ66518.1 | serine_hydroxymethyltransferase_[Bacillus_cereus]                   | CPTF_Fe         | 13906093.53 | 576988.2722 | 4.149175833 |
| UIJ66518.1 | serine_hydroxymethyltransferase_[Bacillus_cereus]                   | CPTF_Mn         | 14817369.9  | 1728590.19  | 11.66597178 |
| UIJ66518.1 | serine_hydroxymethyltransferase_[Bacillus_cereus]                   | CPTF_Ni         | 12671688.53 | 682782.2935 | 5.388250285 |
| UIJ66518.1 | serine_hydroxymethyltransferase_[Bacillus_cereus]                   | CPTF_U          | 11443364.27 | 454587.1423 | 3.972495603 |
| UIJ66518.1 | serine_hydroxymethyltransferase_[Bacillus_cereus]                   | CPTF_metals_mix | 13279319.03 | 1375429.414 | 10.35768032 |
| UIJ66518.1 | serine_hydroxymethyltransferase_[Bacillus_cereus]                   | CPTF_zcontrol   | 14308397.27 | 746154.8889 | 5.214804111 |
| UIJ66519.1 | uracil_phosphoribosyltransferase_[Bacillus_cereus]                  | CPTF_Al         | 3355074.833 | 111860.6473 | 3.334073095 |
| UIJ66519.1 | uracil_phosphoribosyltransferase_[Bacillus_cereus]                  | CPTF_Cd         | 4097131.333 | 265875.5319 | 6.489309477 |
| UIJ66519.1 | uracil_phosphoribosyltransferase_[Bacillus_cereus]                  | CPTF_Co         | 3250349.767 | 309145.8319 | 9.511155848 |
| UIJ66519.1 | uracil_phosphoribosyltransferase_[Bacillus_cereus]                  | CPTF_Cu         | 2978286.233 | 141300.0362 | 4.744340375 |

|            |                                                    |                 |             |             |             |
|------------|----------------------------------------------------|-----------------|-------------|-------------|-------------|
| UIJ66519.1 | uracil_phosphoribosyltransferase [Bacillus cereus] | CPTF_Fe         | 3438833.133 | 304254.5316 | 8.847609635 |
| UIJ66519.1 | uracil_phosphoribosyltransferase [Bacillus cereus] | CPTF_Mn         | 3589677.833 | 326239.0726 | 9.088254929 |
| UIJ66519.1 | uracil_phosphoribosyltransferase [Bacillus cereus] | CPTF_Ni         | 2642387.967 | 125059.1375 | 4.732807562 |
| UIJ66519.1 | uracil_phosphoribosyltransferase [Bacillus cereus] | CPTF_U          | 3260316.633 | 182911.6    | 5.610240372 |
| UIJ66519.1 | uracil_phosphoribosyltransferase [Bacillus cereus] | CPTF_metals_mix | 3603300.267 | 350423.0811 | 9.725059117 |
| UIJ66519.1 | uracil_phosphoribosyltransferase [Bacillus cereus] | CPTF_zcontrol   | 3856455     | 302162.7467 | 7.835246275 |
| UIJ66522.1 | FOF1_ATP_synthase_subunit_A [Bacillus cereus]      | CPTF_Al         | 647593.6667 | 153467.4167 | 23.6981034  |
| UIJ66522.1 | FOF1_ATP_synthase_subunit_A [Bacillus cereus]      | CPTF_Cd         | 533924      | 47563.65744 | 8.908319806 |
| UIJ66522.1 | FOF1_ATP_synthase_subunit_A [Bacillus cereus]      | CPTF_Co         | 660126      | 41652.602   | 6.309795705 |
| UIJ66522.1 | FOF1_ATP_synthase_subunit_A [Bacillus cereus]      | CPTF_Cu         | 592511      | 72284.5889  | 12.19970412 |
| UIJ66522.1 | FOF1_ATP_synthase_subunit_A [Bacillus cereus]      | CPTF_Fe         | 579243.6667 | 91692.73231 | 15.82973411 |
| UIJ66522.1 | FOF1_ATP_synthase_subunit_A [Bacillus cereus]      | CPTF_Mn         | 680765.3333 | 127371.4525 | 18.71003799 |
| UIJ66522.1 | FOF1_ATP_synthase_subunit_A [Bacillus cereus]      | CPTF_Ni         | 639450.6667 | 71901.92344 | 11.24432692 |
| UIJ66522.1 | FOF1_ATP_synthase_subunit_A [Bacillus cereus]      | CPTF_U          | 666817.6667 | 368366.1399 | 55.24240858 |
| UIJ66522.1 | FOF1_ATP_synthase_subunit_A [Bacillus cereus]      | CPTF_metals_mix | 343510.8    | 298948.4757 | 87.02738769 |
| UIJ66522.1 | FOF1_ATP_synthase_subunit_A [Bacillus cereus]      | CPTF_zcontrol   | 804633      | 83238.56722 | 10.34491094 |
| UIJ66524.1 | FOF1_ATP_synthase_subunit_B [Bacillus cereus]      | CPTF_Al         | 3935961     | 221872.4835 | 5.637060009 |
| UIJ66524.1 | FOF1_ATP_synthase_subunit_B [Bacillus cereus]      | CPTF_Cd         | 4415102.467 | 100884.1643 | 2.284979002 |
| UIJ66524.1 | FOF1_ATP_synthase_subunit_B [Bacillus cereus]      | CPTF_Co         | 4031829.333 | 259154.631  | 6.427718277 |
| UIJ66524.1 | FOF1_ATP_synthase_subunit_B [Bacillus cereus]      | CPTF_Cu         | 3909994.7   | 97311.61558 | 2.488791496 |
| UIJ66524.1 | FOF1_ATP_synthase_subunit_B [Bacillus cereus]      | CPTF_Fe         | 3840389.2   | 500553.4376 | 13.03392473 |
| UIJ66524.1 | FOF1_ATP_synthase_subunit_B [Bacillus cereus]      | CPTF_Mn         | 3966384     | 473137.5333 | 11.92733382 |
| UIJ66524.1 | FOF1_ATP_synthase_subunit_B [Bacillus cereus]      | CPTF_Ni         | 3101444     | 684898.5114 | 22.08321386 |
| UIJ66524.1 | FOF1_ATP_synthase_subunit_B [Bacillus cereus]      | CPTF_U          | 3748913.133 | 1096003.308 | 29.23522816 |
| UIJ66524.1 | FOF1_ATP_synthase_subunit_B [Bacillus cereus]      | CPTF_metals_mix | 5802280.867 | 359117.3402 | 6.189244342 |
| UIJ66524.1 | FOF1_ATP_synthase_subunit_B [Bacillus cereus]      | CPTF_zcontrol   | 3850904.233 | 113645.8582 | 2.951147349 |
| UIJ66525.1 | FOF1_ATP_synthase_subunit_delta [Bacillus cereus]  | CPTF_Al         | 4086951.567 | 143945.1593 | 3.522066679 |
| UIJ66525.1 | FOF1_ATP_synthase_subunit_delta [Bacillus cereus]  | CPTF_Cd         | 4055549.667 | 177901.9179 | 4.386629002 |
| UIJ66525.1 | FOF1_ATP_synthase_subunit_delta [Bacillus cereus]  | CPTF_Co         | 3935590.667 | 217472.1097 | 5.525780705 |
| UIJ66525.1 | FOF1_ATP_synthase_subunit_delta [Bacillus cereus]  | CPTF_Cu         | 3563166.667 | 171436.5353 | 4.811353253 |
| UIJ66525.1 | FOF1_ATP_synthase_subunit_delta [Bacillus cereus]  | CPTF_Fe         | 4178747.233 | 134016.5038 | 3.207097638 |
| UIJ66525.1 | FOF1_ATP_synthase_subunit_delta [Bacillus cereus]  | CPTF_Mn         | 3918551.1   | 24164.99512 | 0.616681894 |
| UIJ66525.1 | FOF1_ATP_synthase_subunit_delta [Bacillus cereus]  | CPTF_Ni         | 3911276.4   | 91956.8561  | 2.351070257 |
| UIJ66525.1 | FOF1_ATP_synthase_subunit_delta [Bacillus cereus]  | CPTF_U          | 4038225.9   | 131743.1705 | 3.262402199 |
| UIJ66525.1 | FOF1_ATP_synthase_subunit_delta [Bacillus cereus]  | CPTF_metals_mix | 3315810.367 | 43896.86202 | 1.323865275 |
| UIJ66525.1 | FOF1_ATP_synthase_subunit_delta [Bacillus cereus]  | CPTF_zcontrol   | 4014634.967 | 154981.5565 | 3.860414653 |
| UIJ66526.1 | FOF1_ATP_synthase_subunit_alpha [Bacillus cereus]  | CPTF_Al         | 30496324.2  | 1319113.66  | 4.32548412  |
| UIJ66526.1 | FOF1_ATP_synthase_subunit_alpha [Bacillus cereus]  | CPTF_Cd         | 29954432.43 | 719339.0684 | 2.401444494 |
| UIJ66526.1 | FOF1_ATP_synthase_subunit_alpha [Bacillus cereus]  | CPTF_Co         | 30556778.73 | 1106215.228 | 3.620195826 |
| UIJ66526.1 | FOF1_ATP_synthase_subunit_alpha [Bacillus cereus]  | CPTF_Cu         | 27274964.53 | 2485774.309 | 9.11375817  |
| UIJ66526.1 | FOF1_ATP_synthase_subunit_alpha [Bacillus cereus]  | CPTF_Fe         | 29273195.2  | 1531200.348 | 5.230725029 |
| UIJ66526.1 | FOF1_ATP_synthase_subunit_alpha [Bacillus cereus]  | CPTF_Mn         | 30921002.7  | 3834684.302 | 12.40155224 |
| UIJ66526.1 | FOF1_ATP_synthase_subunit_alpha [Bacillus cereus]  | CPTF_Ni         | 25103674.03 | 2131799.729 | 8.491982993 |
| UIJ66526.1 | FOF1_ATP_synthase_subunit_alpha [Bacillus cereus]  | CPTF_U          | 26207134.14 | 4779632.873 | 18.23790746 |
| UIJ66526.1 | FOF1_ATP_synthase_subunit_alpha [Bacillus cereus]  | CPTF_metals_mix | 36180778.97 | 2225263.115 | 6.15040134  |
| UIJ66526.1 | FOF1_ATP_synthase_subunit_alpha [Bacillus cereus]  | CPTF_zcontrol   | 29149668.6  | 2480609.592 | 8.509906668 |
| UIJ66527.1 | FOF1_ATP_synthase_subunit_gamma [Bacillus cereus]  | CPTF_Al         | 5037948     | 669434.6006 | 13.2890296  |
| UIJ66527.1 | FOF1_ATP_synthase_subunit_gamma [Bacillus cereus]  | CPTF_Cd         | 5253341.5   | 1130984.924 | 21.52886737 |
| UIJ66527.1 | FOF1_ATP_synthase_subunit_gamma [Bacillus cereus]  | CPTF_Co         | 5248761     | 802617.1383 | 15.2915543  |
| UIJ66527.1 | FOF1_ATP_synthase_subunit_gamma [Bacillus cereus]  | CPTF_Cu         | 4628430     | 716700.5677 | 15.48474467 |
| UIJ66527.1 | FOF1_ATP_synthase_subunit_gamma [Bacillus cereus]  | CPTF_Fe         | 4504683.433 | 204587.5326 | 4.541662819 |
| UIJ66527.1 | FOF1_ATP_synthase_subunit_gamma [Bacillus cereus]  | CPTF_Mn         | 4064304.5   | 1179409.14  | 29.01871993 |
| UIJ66527.1 | FOF1_ATP_synthase_subunit_gamma [Bacillus cereus]  | CPTF_Ni         | 4070315.467 | 420272.9914 | 10.32531741 |
| UIJ66527.1 | FOF1_ATP_synthase_subunit_gamma [Bacillus cereus]  | CPTF_U          | 3316378.333 | 1261883.339 | 38.05004171 |
| UIJ66527.1 | FOF1_ATP_synthase_subunit_gamma [Bacillus cereus]  | CPTF_metals_mix | 5996659.4   | 813359.8314 | 13.56354892 |
| UIJ66527.1 | FOF1_ATP_synthase_subunit_gamma [Bacillus cereus]  | CPTF_zcontrol   | 4509434.667 | 860457.204  | 19.08126556 |
| UIJ66528.1 | FOF1_ATP_synthase_subunit_beta [Bacillus cereus]   | CPTF_Al         | 43088183.3  | 3347257.768 | 7.768389177 |
| UIJ66528.1 | FOF1_ATP_synthase_subunit_beta [Bacillus cereus]   | CPTF_Cd         | 48687874.97 | 823463.3215 | 1.69131087  |
| UIJ66528.1 | FOF1_ATP_synthase_subunit_beta [Bacillus cereus]   | CPTF_Co         | 40297751.33 | 2522138.33  | 6.258756995 |
| UIJ66528.1 | FOF1_ATP_synthase_subunit_beta [Bacillus cereus]   | CPTF_Cu         | 35738998    | 525790.8432 | 1.471196375 |
| UIJ66528.1 | FOF1_ATP_synthase_subunit_beta [Bacillus cereus]   | CPTF_Fe         | 43855842.67 | 4590638.497 | 10.46756422 |

|            |                                                                     |                 |             |             |             |
|------------|---------------------------------------------------------------------|-----------------|-------------|-------------|-------------|
| UIJ66528.1 | FOF1_ATP_synthase_subunit_beta_[Bacillus_cereus]                    | CPTF_Mn         | 44186959.77 | 8814630.653 | 19.94848865 |
| UIJ66528.1 | FOF1_ATP_synthase_subunit_beta_[Bacillus_cereus]                    | CPTF_Ni         | 30590140.47 | 2011775.164 | 6.576547649 |
| UIJ66528.1 | FOF1_ATP_synthase_subunit_beta_[Bacillus_cereus]                    | CPTF_U          | 36448389.2  | 3997577.316 | 10.96777499 |
| UIJ66528.1 | FOF1_ATP_synthase_subunit_beta_[Bacillus_cereus]                    | CPTF_metals_mix | 46240284.37 | 4533619.719 | 9.80448062  |
| UIJ66528.1 | FOF1_ATP_synthase_subunit_beta_[Bacillus_cereus]                    | CPTF_zcontrol   | 41320107.8  | 4271913.917 | 10.33858367 |
| UIJ66529.1 | FOF1_ATP_synthase_subunit_epsilon_[Bacillus_cereus]                 | CPTF_Al         | 2575626.833 | 236463.6811 | 9.180820687 |
| UIJ66529.1 | FOF1_ATP_synthase_subunit_epsilon_[Bacillus_cereus]                 | CPTF_Cd         | 2618729.933 | 82109.5575  | 3.135472522 |
| UIJ66529.1 | FOF1_ATP_synthase_subunit_epsilon_[Bacillus_cereus]                 | CPTF_Co         | 2764866.733 | 160615.2492 | 5.80914976  |
| UIJ66529.1 | FOF1_ATP_synthase_subunit_epsilon_[Bacillus_cereus]                 | CPTF_Cu         | 2487595     | 332904.2524 | 13.38257443 |
| UIJ66529.1 | FOF1_ATP_synthase_subunit_epsilon_[Bacillus_cereus]                 | CPTF_Fe         | 2560492.2   | 219045.6214 | 8.554824788 |
| UIJ66529.1 | FOF1_ATP_synthase_subunit_epsilon_[Bacillus_cereus]                 | CPTF_Mn         | 2583237     | 350102.4427 | 13.55285801 |
| UIJ66529.1 | FOF1_ATP_synthase_subunit_epsilon_[Bacillus_cereus]                 | CPTF_Ni         | 2330502.1   | 292231.6078 | 12.53942692 |
| UIJ66529.1 | FOF1_ATP_synthase_subunit_epsilon_[Bacillus_cereus]                 | CPTF_U          | 2015495.033 | 250335.5967 | 12.42055141 |
| UIJ66529.1 | FOF1_ATP_synthase_subunit_epsilon_[Bacillus_cereus]                 | CPTF_metals_mix | 2419095.633 | 58998.2203  | 2.4388544   |
| UIJ66529.1 | FOF1_ATP_synthase_subunit_epsilon_[Bacillus_cereus]                 | CPTF_zcontrol   | 2378438.867 | 227037.1088 | 9.545635668 |
| UIJ66530.1 | DUF975_family_protein_[Bacillus_cereus]                             | CPTF_Al         | 91012.06667 | 19950.945   | 21.92120861 |
| UIJ66530.1 | DUF975_family_protein_[Bacillus_cereus]                             | CPTF_Cd         | 35039.13333 | 32379.36594 | 92.40915189 |
| UIJ66530.1 | DUF975_family_protein_[Bacillus_cereus]                             | CPTF_Co         | 75680.96667 | 79000.03847 | 104.3856097 |
| UIJ66530.1 | DUF975_family_protein_[Bacillus_cereus]                             | CPTF_Cu         | 0           | 0           | 0           |
| UIJ66530.1 | DUF975_family_protein_[Bacillus_cereus]                             | CPTF_Fe         | 49702.93333 | 45934.9504  | 92.41899285 |
| UIJ66530.1 | DUF975_family_protein_[Bacillus_cereus]                             | CPTF_Mn         | 22072.1     | 38229.99863 | 173.2050808 |
| UIJ66530.1 | DUF975_family_protein_[Bacillus_cereus]                             | CPTF_Ni         | 33736.73333 | 29367.65831 | 87.04950187 |
| UIJ66530.1 | DUF975_family_protein_[Bacillus_cereus]                             | CPTF_U          | 31999.96667 | 55425.56811 | 173.2050808 |
| UIJ66530.1 | DUF975_family_protein_[Bacillus_cereus]                             | CPTF_metals_mix | 18212.63333 | 31545.20627 | 173.2050808 |
| UIJ66530.1 | DUF975_family_protein_[Bacillus_cereus]                             | CPTF_zcontrol   | 58819.63333 | 27589.54627 | 46.90533535 |
| UIJ66546.1 | UDP-N-acetylglucosamine_1-carboxyvinyltransferase_[Bacillus_cereus] | CPTF_Al         | 345623.3333 | 331357.3152 | 95.8723799  |
| UIJ66546.1 | UDP-N-acetylglucosamine_1-carboxyvinyltransferase_[Bacillus_cereus] | CPTF_Cd         | 639625.6667 | 28538.53942 | 4.461756447 |
| UIJ66546.1 | UDP-N-acetylglucosamine_1-carboxyvinyltransferase_[Bacillus_cereus] | CPTF_Co         | 753549.4667 | 72691.27184 | 9.646516262 |
| UIJ66546.1 | UDP-N-acetylglucosamine_1-carboxyvinyltransferase_[Bacillus_cereus] | CPTF_Cu         | 707427.3333 | 85687.98265 | 12.11261972 |
| UIJ66546.1 | UDP-N-acetylglucosamine_1-carboxyvinyltransferase_[Bacillus_cereus] | CPTF_Fe         | 366020.3333 | 319511.3408 | 87.29333091 |
| UIJ66546.1 | UDP-N-acetylglucosamine_1-carboxyvinyltransferase_[Bacillus_cereus] | CPTF_Mn         | 604204.6667 | 42625.56301 | 7.054821878 |
| UIJ66546.1 | UDP-N-acetylglucosamine_1-carboxyvinyltransferase_[Bacillus_cereus] | CPTF_Ni         | 690338      | 71021.63862 | 10.2879515  |
| UIJ66546.1 | UDP-N-acetylglucosamine_1-carboxyvinyltransferase_[Bacillus_cereus] | CPTF_U          | 763260      | 122779.8912 | 16.0862473  |
| UIJ66546.1 | UDP-N-acetylglucosamine_1-carboxyvinyltransferase_[Bacillus_cereus] | CPTF_metals_mix | 634877.4    | 90934.9003  | 14.32322214 |
| UIJ66546.1 | UDP-N-acetylglucosamine_1-carboxyvinyltransferase_[Bacillus_cereus] | CPTF_zcontrol   | 707592      | 37925.63571 | 5.359816916 |
| UIJ66554.1 | rod_shape-determining_protein_[Bacillus_cereus]                     | CPTF_Al         | 1784117.133 | 763898.1689 | 42.81659285 |
| UIJ66554.1 | rod_shape-determining_protein_[Bacillus_cereus]                     | CPTF_Cd         | 1218414.333 | 442023.2332 | 36.27856478 |
| UIJ66554.1 | rod_shape-determining_protein_[Bacillus_cereus]                     | CPTF_Co         | 1935071.967 | 1248458.81  | 64.5174356  |
| UIJ66554.1 | rod_shape-determining_protein_[Bacillus_cereus]                     | CPTF_Cu         | 2159044.067 | 588337.8866 | 27.24992489 |
| UIJ66554.1 | rod_shape-determining_protein_[Bacillus_cereus]                     | CPTF_Fe         | 1939866.333 | 1149452.206 | 59.25419632 |
| UIJ66554.1 | rod_shape-determining_protein_[Bacillus_cereus]                     | CPTF_Mn         | 1330104.6   | 352330.8955 | 26.48896151 |
| UIJ66554.1 | rod_shape-determining_protein_[Bacillus_cereus]                     | CPTF_Ni         | 1202086.467 | 241408.8444 | 20.08248584 |
| UIJ66554.1 | rod_shape-determining_protein_[Bacillus_cereus]                     | CPTF_U          | 1679119.867 | 816333.0999 | 48.61672571 |
| UIJ66554.1 | rod_shape-determining_protein_[Bacillus_cereus]                     | CPTF_metals_mix | 3453758.9   | 158843.7601 | 4.599156013 |
| UIJ66554.1 | rod_shape-determining_protein_[Bacillus_cereus]                     | CPTF_zcontrol   | 1169599.7   | 307980.2244 | 26.33210529 |
| UIJ66555.1 | 3-hydroxyacyl-ACP_dehydratase_FabZ_[Bacillus_cereus]                | CPTF_Al         | 547907.8667 | 22326.02493 | 4.074777218 |
| UIJ66555.1 | 3-hydroxyacyl-ACP_dehydratase_FabZ_[Bacillus_cereus]                | CPTF_Cd         | 518290.3333 | 113393.3248 | 21.87834067 |
| UIJ66555.1 | 3-hydroxyacyl-ACP_dehydratase_FabZ_[Bacillus_cereus]                | CPTF_Co         | 625565.5667 | 122705.5506 | 19.61513823 |
| UIJ66555.1 | 3-hydroxyacyl-ACP_dehydratase_FabZ_[Bacillus_cereus]                | CPTF_Cu         | 493373      | 55766.27845 | 11.30306653 |
| UIJ66555.1 | 3-hydroxyacyl-ACP_dehydratase_FabZ_[Bacillus_cereus]                | CPTF_Fe         | 463426.2667 | 81254.7638  | 17.53348259 |
| UIJ66555.1 | 3-hydroxyacyl-ACP_dehydratase_FabZ_[Bacillus_cereus]                | CPTF_Mn         | 568175.3333 | 49411.79828 | 8.696575754 |
| UIJ66555.1 | 3-hydroxyacyl-ACP_dehydratase_FabZ_[Bacillus_cereus]                | CPTF_Ni         | 460075.8    | 157587.8143 | 34.25257628 |
| UIJ66555.1 | 3-hydroxyacyl-ACP_dehydratase_FabZ_[Bacillus_cereus]                | CPTF_U          | 335907.3333 | 127761.3755 | 38.03470863 |
| UIJ66555.1 | 3-hydroxyacyl-ACP_dehydratase_FabZ_[Bacillus_cereus]                | CPTF_metals_mix | 316414.3333 | 26857.38074 | 8.488041758 |
| UIJ66555.1 | 3-hydroxyacyl-ACP_dehydratase_FabZ_[Bacillus_cereus]                | CPTF_zcontrol   | 514535.3333 | 71388.28614 | 13.87432145 |
| UIJ66556.1 | CpsD/CapB_family_tyrosine-protein_kinase_[Bacillus_cereus]          | CPTF_Al         | 21307.7     | 36906.01899 | 173.2050808 |
| UIJ66556.1 | CpsD/CapB_family_tyrosine-protein_kinase_[Bacillus_cereus]          | CPTF_Cd         | 50052.03333 | 43427.63098 | 86.76496854 |
| UIJ66556.1 | CpsD/CapB_family_tyrosine-protein_kinase_[Bacillus_cereus]          | CPTF_Co         | 0           | 0           | 0           |
| UIJ66556.1 | CpsD/CapB_family_tyrosine-protein_kinase_[Bacillus_cereus]          | CPTF_Cu         | 37123.06667 | 5402.604696 | 14.55322844 |
| UIJ66556.1 | CpsD/CapB_family_tyrosine-protein_kinase_[Bacillus_cereus]          | CPTF_Fe         | 16924.46667 | 29314.03616 | 173.2050808 |
| UIJ66556.1 | CpsD/CapB_family_tyrosine-protein_kinase_[Bacillus_cereus]          | CPTF_Mn         | 58431.66667 | 101206.6154 | 173.2050808 |

|            |                                                                      |                 |             |             |             |
|------------|----------------------------------------------------------------------|-----------------|-------------|-------------|-------------|
| UIJ66556.1 | CpsD/CapB_family_tyrosine-protein_kinase_[Bacillus_cereus]           | CPTF_Ni         | 0           | 0           | 0           |
| UIJ66556.1 | CpsD/CapB_family_tyrosine-protein_kinase_[Bacillus_cereus]           | CPTF_U          | 0           | 0           | 0           |
| UIJ66556.1 | CpsD/CapB_family_tyrosine-protein_kinase_[Bacillus_cereus]           | CPTF_metals_mix | 173953.1667 | 57372.5212  | 32.98159056 |
| UIJ66556.1 | CpsD/CapB_family_tyrosine-protein_kinase_[Bacillus_cereus]           | CPTF_zcontrol   | 0           | 0           | 0           |
| UIJ66559.1 | tyrosine_protein_phosphatase_[Bacillus_cereus]                       | CPTF_Al         | 9644.1      | 16704.07119 | 173.2050808 |
| UIJ66559.1 | tyrosine_protein_phosphatase_[Bacillus_cereus]                       | CPTF_Cd         | 26962.73333 | 23375.46255 | 86.69544833 |
| UIJ66559.1 | tyrosine_protein_phosphatase_[Bacillus_cereus]                       | CPTF_Co         | 0           | 0           | 0           |
| UIJ66559.1 | tyrosine_protein_phosphatase_[Bacillus_cereus]                       | CPTF_Cu         | 0           | 0           | 0           |
| UIJ66559.1 | tyrosine_protein_phosphatase_[Bacillus_cereus]                       | CPTF_Fe         | 0           | 0           | 0           |
| UIJ66559.1 | tyrosine_protein_phosphatase_[Bacillus_cereus]                       | CPTF_Mn         | 0           | 0           | 0           |
| UIJ66559.1 | tyrosine_protein_phosphatase_[Bacillus_cereus]                       | CPTF_Ni         | 0           | 0           | 0           |
| UIJ66559.1 | tyrosine_protein_phosphatase_[Bacillus_cereus]                       | CPTF_U          | 0           | 0           | 0           |
| UIJ66559.1 | tyrosine_protein_phosphatase_[Bacillus_cereus]                       | CPTF_metals_mix | 0           | 0           | 0           |
| UIJ66559.1 | tyrosine_protein_phosphatase_[Bacillus_cereus]                       | CPTF_zcontrol   | 0           | 0           | 0           |
| UIJ66592.1 | efflux_RND_transporter_periplasmic_adaptor_subunit_[Bacillus_cereus] | CPTF_Al         | 979074.0333 | 97339.12803 | 9.941957882 |
| UIJ66592.1 | efflux_RND_transporter_periplasmic_adaptor_subunit_[Bacillus_cereus] | CPTF_Cd         | 742014.2667 | 225400.6205 | 30.37685805 |
| UIJ66592.1 | efflux_RND_transporter_periplasmic_adaptor_subunit_[Bacillus_cereus] | CPTF_Co         | 866949.8    | 174526.0146 | 20.13104041 |
| UIJ66592.1 | efflux_RND_transporter_periplasmic_adaptor_subunit_[Bacillus_cereus] | CPTF_Cu         | 682930.5    | 56171.41748 | 8.225056208 |
| UIJ66592.1 | efflux_RND_transporter_periplasmic_adaptor_subunit_[Bacillus_cereus] | CPTF_Fe         | 716700.8    | 175359.8572 | 24.46765194 |
| UIJ66592.1 | efflux_RND_transporter_periplasmic_adaptor_subunit_[Bacillus_cereus] | CPTF_Mn         | 781136.9667 | 175621.0171 | 22.48274306 |
| UIJ66592.1 | efflux_RND_transporter_periplasmic_adaptor_subunit_[Bacillus_cereus] | CPTF_Ni         | 860218.7667 | 210283.1406 | 24.44530958 |
| UIJ66592.1 | efflux_RND_transporter_periplasmic_adaptor_subunit_[Bacillus_cereus] | CPTF_U          | 581023.6667 | 148762.1674 | 25.60346091 |
| UIJ66592.1 | efflux_RND_transporter_periplasmic_adaptor_subunit_[Bacillus_cereus] | CPTF_metals_mix | 349899.7    | 35868.89935 | 10.25119466 |
| UIJ66592.1 | efflux_RND_transporter_periplasmic_adaptor_subunit_[Bacillus_cereus] | CPTF_zcontrol   | 739053.3333 | 65696.6602  | 8.889298951 |
| UIJ66594.1 | ABC_transporter_permease_[Bacillus_cereus]                           | CPTF_Al         | 82208.26667 | 8249.689463 | 10.03510936 |
| UIJ66594.1 | ABC_transporter_permease_[Bacillus_cereus]                           | CPTF_Cd         | 141144.2    | 69482.89202 | 49.22830128 |
| UIJ66594.1 | ABC_transporter_permease_[Bacillus_cereus]                           | CPTF_Co         | 112424.5    | 19488.00385 | 17.33430334 |
| UIJ66594.1 | ABC_transporter_permease_[Bacillus_cereus]                           | CPTF_Cu         | 78361.23333 | 10518.94039 | 13.42365344 |
| UIJ66594.1 | ABC_transporter_permease_[Bacillus_cereus]                           | CPTF_Fe         | 121696.9667 | 28387.78484 | 23.32661661 |
| UIJ66594.1 | ABC_transporter_permease_[Bacillus_cereus]                           | CPTF_Mn         | 73404.66667 | 63883.79182 | 87.0296055  |
| UIJ66594.1 | ABC_transporter_permease_[Bacillus_cereus]                           | CPTF_Ni         | 43867.03333 | 45588.70892 | 103.9247596 |
| UIJ66594.1 | ABC_transporter_permease_[Bacillus_cereus]                           | CPTF_U          | 0           | 0           | 0           |
| UIJ66594.1 | ABC_transporter_permease_[Bacillus_cereus]                           | CPTF_metals_mix | 12020.13333 | 20819.48165 | 173.2050808 |
| UIJ66594.1 | ABC_transporter_permease_[Bacillus_cereus]                           | CPTF_zcontrol   | 102999.1667 | 54644.80491 | 53.05363788 |
| UIJ66595.1 | YIP1_family_protein_[Bacillus_cereus]                                | CPTF_Al         | 97143.06667 | 110424.6687 | 113.6722079 |
| UIJ66595.1 | YIP1_family_protein_[Bacillus_cereus]                                | CPTF_Cd         | 341097      | 58095.17272 | 17.0318627  |
| UIJ66595.1 | YIP1_family_protein_[Bacillus_cereus]                                | CPTF_Co         | 119110      | 121072.5377 | 101.6476683 |
| UIJ66595.1 | YIP1_family_protein_[Bacillus_cereus]                                | CPTF_Cu         | 30931.53333 | 35579.32318 | 115.0260571 |
| UIJ66595.1 | YIP1_family_protein_[Bacillus_cereus]                                | CPTF_Fe         | 181995.0333 | 124040.2853 | 68.15586287 |
| UIJ66595.1 | YIP1_family_protein_[Bacillus_cereus]                                | CPTF_Mn         | 151976      | 164564.8728 | 108.2834611 |
| UIJ66595.1 | YIP1_family_protein_[Bacillus_cereus]                                | CPTF_Ni         | 0           | 0           | 0           |
| UIJ66595.1 | YIP1_family_protein_[Bacillus_cereus]                                | CPTF_U          | 24417.46667 | 42292.29286 | 173.2050808 |
| UIJ66595.1 | YIP1_family_protein_[Bacillus_cereus]                                | CPTF_metals_mix | 228889      | 42758.9054  | 18.68106611 |
| UIJ66595.1 | YIP1_family_protein_[Bacillus_cereus]                                | CPTF_zcontrol   | 15880.26667 | 27505.4287  | 173.2050808 |
| UIJ66597.1 | NCS2_family_permease_[Bacillus_cereus]                               | CPTF_Al         | 42948.33333 | 74388.69543 | 173.2050808 |
| UIJ66597.1 | NCS2_family_permease_[Bacillus_cereus]                               | CPTF_Cd         | 21046.36667 | 36453.37638 | 173.2050808 |
| UIJ66597.1 | NCS2_family_permease_[Bacillus_cereus]                               | CPTF_Co         | 81426.6     | 66906.67727 | 82.16808422 |
| UIJ66597.1 | NCS2_family_permease_[Bacillus_cereus]                               | CPTF_Cu         | 63993.46667 | 68535.68227 | 107.0979365 |
| UIJ66597.1 | NCS2_family_permease_[Bacillus_cereus]                               | CPTF_Fe         | 56624.53333 | 53947.96124 | 95.27312291 |
| UIJ66597.1 | NCS2_family_permease_[Bacillus_cereus]                               | CPTF_Mn         | 54036.66667 | 93594.25214 | 173.2050808 |
| UIJ66597.1 | NCS2_family_permease_[Bacillus_cereus]                               | CPTF_Ni         | 113148.2667 | 73670.91543 | 65.11006982 |
| UIJ66597.1 | NCS2_family_permease_[Bacillus_cereus]                               | CPTF_U          | 271337      | 367552.7158 | 135.4598583 |
| UIJ66597.1 | NCS2_family_permease_[Bacillus_cereus]                               | CPTF_metals_mix | 0           | 0           | 0           |
| UIJ66597.1 | NCS2_family_permease_[Bacillus_cereus]                               | CPTF_zcontrol   | 244513.3333 | 156438.7198 | 63.97962749 |
| UIJ66603.1 | 5-(carboxyamino)imidazole_ribonucleotide_mutase_[Bacillus_cereus]    | CPTF_Al         | 2023974.833 | 112389.2231 | 5.552896275 |
| UIJ66603.1 | 5-(carboxyamino)imidazole_ribonucleotide_mutase_[Bacillus_cereus]    | CPTF_Cd         | 2268700.133 | 185692.648  | 8.184979814 |
| UIJ66603.1 | 5-(carboxyamino)imidazole_ribonucleotide_mutase_[Bacillus_cereus]    | CPTF_Co         | 2357952.5   | 146416.2295 | 6.209464757 |
| UIJ66603.1 | 5-(carboxyamino)imidazole_ribonucleotide_mutase_[Bacillus_cereus]    | CPTF_Cu         | 1758286     | 65219.68188 | 3.709276072 |
| UIJ66603.1 | 5-(carboxyamino)imidazole_ribonucleotide_mutase_[Bacillus_cereus]    | CPTF_Fe         | 2138514.6   | 58588.36549 | 2.739675731 |
| UIJ66603.1 | 5-(carboxyamino)imidazole_ribonucleotide_mutase_[Bacillus_cereus]    | CPTF_Mn         | 1990267.4   | 234205.5464 | 11.76754171 |
| UIJ66603.1 | 5-(carboxyamino)imidazole_ribonucleotide_mutase_[Bacillus_cereus]    | CPTF_Ni         | 1969324.733 | 247188.7163 | 12.55195307 |

|            |                                                                           |                 |             |             |             |
|------------|---------------------------------------------------------------------------|-----------------|-------------|-------------|-------------|
| UIJ66603.1 | 5-(carboxyamino)imidazole_ribonucleotide_mutase_[Bacillus_cereus]         | CPTF_U          | 1275579.833 | 243814.3559 | 19.11400209 |
| UIJ66603.1 | 5-(carboxyamino)imidazole_ribonucleotide_mutase_[Bacillus_cereus]         | CPTF_metals_mix | 1603848.733 | 47935.2416  | 2.988763255 |
| UIJ66603.1 | 5-(carboxyamino)imidazole_ribonucleotide_mutase_[Bacillus_cereus]         | CPTF_zcontrol   | 1852293.833 | 129350.2633 | 6.983247527 |
| UIJ66604.1 | 5-(carboxyamino)imidazole_ribonucleotide_synthase_[Bacillus_cereus]       | CPTF_Al         | 6238703.1   | 58247.63254 | 0.933649696 |
| UIJ66604.1 | 5-(carboxyamino)imidazole_ribonucleotide_synthase_[Bacillus_cereus]       | CPTF_Cd         | 6395932.7   | 91785.10303 | 1.435054234 |
| UIJ66604.1 | 5-(carboxyamino)imidazole_ribonucleotide_synthase_[Bacillus_cereus]       | CPTF_Co         | 6212078.267 | 170682.4535 | 2.747590197 |
| UIJ66604.1 | 5-(carboxyamino)imidazole_ribonucleotide_synthase_[Bacillus_cereus]       | CPTF_Cu         | 5146963.267 | 565802.6625 | 10.99294153 |
| UIJ66604.1 | 5-(carboxyamino)imidazole_ribonucleotide_synthase_[Bacillus_cereus]       | CPTF_Fe         | 6567495.333 | 434301.6029 | 6.612895494 |
| UIJ66604.1 | 5-(carboxyamino)imidazole_ribonucleotide_synthase_[Bacillus_cereus]       | CPTF_Mn         | 6018531.267 | 582246.0961 | 9.674222336 |
| UIJ66604.1 | 5-(carboxyamino)imidazole_ribonucleotide_synthase_[Bacillus_cereus]       | CPTF_Ni         | 4474533.333 | 943854.2139 | 21.09391401 |
| UIJ66604.1 | 5-(carboxyamino)imidazole_ribonucleotide_synthase_[Bacillus_cereus]       | CPTF_U          | 5999368.333 | 236100.3898 | 3.93542081  |
| UIJ66604.1 | 5-(carboxyamino)imidazole_ribonucleotide_synthase_[Bacillus_cereus]       | CPTF_metals_mix | 3695394.8   | 29415.27941 | 0.79599829  |
| UIJ66604.1 | 5-(carboxyamino)imidazole_ribonucleotide_synthase_[Bacillus_cereus]       | CPTF_zcontrol   | 6515897.433 | 778368.9754 | 11.94569103 |
| UIJ66605.1 | adenylosuccinate_lyase_[Bacillus_cereus]                                  | CPTF_Al         | 10683509.9  | 1374780.197 | 12.8682447  |
| UIJ66605.1 | adenylosuccinate_lyase_[Bacillus_cereus]                                  | CPTF_Cd         | 12498368.17 | 1154047.429 | 9.233584844 |
| UIJ66605.1 | adenylosuccinate_lyase_[Bacillus_cereus]                                  | CPTF_Co         | 11826830.7  | 736648.4122 | 6.228620591 |
| UIJ66605.1 | adenylosuccinate_lyase_[Bacillus_cereus]                                  | CPTF_Cu         | 10235667.63 | 152789.1541 | 1.492713124 |
| UIJ66605.1 | adenylosuccinate_lyase_[Bacillus_cereus]                                  | CPTF_Fe         | 11539897.9  | 2046422.082 | 17.7334505  |
| UIJ66605.1 | adenylosuccinate_lyase_[Bacillus_cereus]                                  | CPTF_Mn         | 11487561.73 | 2942452.601 | 25.61424843 |
| UIJ66605.1 | adenylosuccinate_lyase_[Bacillus_cereus]                                  | CPTF_Ni         | 8299076.833 | 677196.4003 | 8.159900359 |
| UIJ66605.1 | adenylosuccinate_lyase_[Bacillus_cereus]                                  | CPTF_U          | 8797150.8   | 1402600.51  | 15.94380433 |
| UIJ66605.1 | adenylosuccinate_lyase_[Bacillus_cereus]                                  | CPTF_metals_mix | 11793545.23 | 887787.7519 | 7.527747298 |
| UIJ66605.1 | adenylosuccinate_lyase_[Bacillus_cereus]                                  | CPTF_zcontrol   | 10912130.03 | 1411225.578 | 12.93263161 |
| UIJ66606.1 | phosphoribosylaminoimidazolesuccinocarboxamide_synthase_[Bacillus_cereus] | CPTF_Al         | 8072643.333 | 1532860.838 | 18.98833846 |
| UIJ66606.1 | phosphoribosylaminoimidazolesuccinocarboxamide_synthase_[Bacillus_cereus] | CPTF_Cd         | 8653143.167 | 251375.6772 | 2.90502159  |
| UIJ66606.1 | phosphoribosylaminoimidazolesuccinocarboxamide_synthase_[Bacillus_cereus] | CPTF_Co         | 8938962.267 | 218284.525  | 2.441944809 |
| UIJ66606.1 | phosphoribosylaminoimidazolesuccinocarboxamide_synthase_[Bacillus_cereus] | CPTF_Cu         | 6878455.7   | 531346.1938 | 7.724789066 |
| UIJ66606.1 | phosphoribosylaminoimidazolesuccinocarboxamide_synthase_[Bacillus_cereus] | CPTF_Fe         | 9080792     | 321762.7317 | 3.543333353 |
| UIJ66606.1 | phosphoribosylaminoimidazolesuccinocarboxamide_synthase_[Bacillus_cereus] | CPTF_Mn         | 8815755.7   | 492612.4388 | 5.587863997 |
| UIJ66606.1 | phosphoribosylaminoimidazolesuccinocarboxamide_synthase_[Bacillus_cereus] | CPTF_Ni         | 8776303.533 | 669894.4731 | 7.632991163 |
| UIJ66606.1 | phosphoribosylaminoimidazolesuccinocarboxamide_synthase_[Bacillus_cereus] | CPTF_U          | 9226735.5   | 277803.4376 | 3.010852945 |
| UIJ66606.1 | phosphoribosylaminoimidazolesuccinocarboxamide_synthase_[Bacillus_cereus] | CPTF_metals_mix | 4966380.433 | 652859.7859 | 13.1455855  |
| UIJ66606.1 | phosphoribosylaminoimidazolesuccinocarboxamide_synthase_[Bacillus_cereus] | CPTF_zcontrol   | 8936598.067 | 319215.3278 | 3.572000502 |
| UIJ66607.1 | phosphoribosylformylglycinamide_synthase_subunit_PurS_[Bacillus_cereus]   | CPTF_Al         | 8182070.433 | 347614.5005 | 4.248490688 |
| UIJ66607.1 | phosphoribosylformylglycinamide_synthase_subunit_PurS_[Bacillus_cereus]   | CPTF_Cd         | 8195135.933 | 65095.2607  | 0.794315814 |
| UIJ66607.1 | phosphoribosylformylglycinamide_synthase_subunit_PurS_[Bacillus_cereus]   | CPTF_Co         | 9015586.1   | 668581.744  | 7.415843369 |
| UIJ66607.1 | phosphoribosylformylglycinamide_synthase_subunit_PurS_[Bacillus_cereus]   | CPTF_Cu         | 6611601.7   | 164992.536  | 2.495500236 |
| UIJ66607.1 | phosphoribosylformylglycinamide_synthase_subunit_PurS_[Bacillus_cereus]   | CPTF_Fe         | 8861141.167 | 583463.4627 | 6.584518311 |
| UIJ66607.1 | phosphoribosylformylglycinamide_synthase_subunit_PurS_[Bacillus_cereus]   | CPTF_Mn         | 8889422.033 | 1082721.096 | 12.1798818  |
| UIJ66607.1 | phosphoribosylformylglycinamide_synthase_subunit_PurS_[Bacillus_cereus]   | CPTF_Ni         | 6878977.667 | 614045.6785 | 8.926408956 |
| UIJ66607.1 | phosphoribosylformylglycinamide_synthase_subunit_PurS_[Bacillus_cereus]   | CPTF_U          | 7449712.667 | 824423.8722 | 11.06651906 |
| UIJ66607.1 | phosphoribosylformylglycinamide_synthase_subunit_PurS_[Bacillus_cereus]   | CPTF_metals_mix | 5246867.2   | 312470.3101 | 5.955369142 |
| UIJ66607.1 | phosphoribosylformylglycinamide_synthase_subunit_PurS_[Bacillus_cereus]   | CPTF_zcontrol   | 8869553.233 | 867276.2306 | 9.778127576 |
| UIJ66608.1 | phosphoribosylformylglycinamide_synthase_subunit_PurQ_[Bacillus_cereus]   | CPTF_Al         | 4926441.333 | 473091.5502 | 9.603109389 |
| UIJ66608.1 | phosphoribosylformylglycinamide_synthase_subunit_PurQ_[Bacillus_cereus]   | CPTF_Cd         | 5917269.667 | 473073.1991 | 7.994788572 |
| UIJ66608.1 | phosphoribosylformylglycinamide_synthase_subunit_PurQ_[Bacillus_cereus]   | CPTF_Co         | 5101066     | 375213.4691 | 7.355589383 |
| UIJ66608.1 | phosphoribosylformylglycinamide_synthase_subunit_PurQ_[Bacillus_cereus]   | CPTF_Cu         | 3738383     | 133715.7211 | 3.576833115 |
| UIJ66608.1 | phosphoribosylformylglycinamide_synthase_subunit_PurQ_[Bacillus_cereus]   | CPTF_Fe         | 5373146     | 566087.4268 | 10.53549311 |
| UIJ66608.1 | phosphoribosylformylglycinamide_synthase_subunit_PurQ_[Bacillus_cereus]   | CPTF_Mn         | 5707693.333 | 1501986.441 | 26.3151216  |
| UIJ66608.1 | phosphoribosylformylglycinamide_synthase_subunit_PurQ_[Bacillus_cereus]   | CPTF_Ni         | 4333472     | 97287.79239 | 2.24503106  |
| UIJ66608.1 | phosphoribosylformylglycinamide_synthase_subunit_PurQ_[Bacillus_cereus]   | CPTF_U          | 4690674     | 378433.0714 | 8.067776003 |
| UIJ66608.1 | phosphoribosylformylglycinamide_synthase_subunit_PurQ_[Bacillus_cereus]   | CPTF_metals_mix | 4693550.4   | 390694.9974 | 8.324082286 |
| UIJ66608.1 | phosphoribosylformylglycinamide_synthase_subunit_PurQ_[Bacillus_cereus]   | CPTF_zcontrol   | 4976585.667 | 376530.5359 | 7.566041482 |
| UIJ66609.1 | phosphoribosylformylglycinamide_synthase_II_[Bacillus_cereus]             | CPTF_Al         | 29380606.2  | 1104999.885 | 3.760983953 |
| UIJ66609.1 | phosphoribosylformylglycinamide_synthase_II_[Bacillus_cereus]             | CPTF_Cd         | 30872125.23 | 1743326.459 | 5.64692727  |
| UIJ66609.1 | phosphoribosylformylglycinamide_synthase_II_[Bacillus_cereus]             | CPTF_Co         | 31737636.47 | 659345.0203 | 2.077486208 |
| UIJ66609.1 | phosphoribosylformylglycinamide_synthase_II_[Bacillus_cereus]             | CPTF_Cu         | 25471744.67 | 1493726.181 | 5.864247622 |
| UIJ66609.1 | phosphoribosylformylglycinamide_synthase_II_[Bacillus_cereus]             | CPTF_Fe         | 31925845.47 | 1435725.084 | 4.497062061 |
| UIJ66609.1 | phosphoribosylformylglycinamide_synthase_II_[Bacillus_cereus]             | CPTF_Mn         | 30679134.8  | 543150.331  | 1.770422584 |
| UIJ66609.1 | phosphoribosylformylglycinamide_synthase_II_[Bacillus_cereus]             | CPTF_Ni         | 26862361.8  | 233625.7534 | 0.869714119 |
| UIJ66609.1 | phosphoribosylformylglycinamide_synthase_II_[Bacillus_cereus]             | CPTF_U          | 27172113.33 | 1268214.93  | 4.667340059 |

|            |                                                                                                             |                 |             |             |             |
|------------|-------------------------------------------------------------------------------------------------------------|-----------------|-------------|-------------|-------------|
| UIJ66609.1 | phosphoribosylformylglycinamide synthase_II [Bacillus cereus]                                               | CPTF_metals_mix | 19640144.3  | 730235.0679 | 3.718073843 |
| UIJ66609.1 | phosphoribosylformylglycinamide synthase_II [Bacillus cereus]                                               | CPTF_zcontrol   | 30778077    | 2723159.647 | 8.847725111 |
| UIJ66610.1 | amidophosphoribosyltransferase [Bacillus cereus]                                                            | CPTF_Al         | 4463054.9   | 422125.0358 | 9.458208452 |
| UIJ66610.1 | amidophosphoribosyltransferase [Bacillus cereus]                                                            | CPTF_Cd         | 4253382.733 | 217026.3004 | 5.102439964 |
| UIJ66610.1 | amidophosphoribosyltransferase [Bacillus cereus]                                                            | CPTF_Co         | 5280785.8   | 287601.46   | 5.446186815 |
| UIJ66610.1 | amidophosphoribosyltransferase [Bacillus cereus]                                                            | CPTF_Cu         | 3680358.1   | 132734.5718 | 3.606566756 |
| UIJ66610.1 | amidophosphoribosyltransferase [Bacillus cereus]                                                            | CPTF_Fe         | 4389273.933 | 198963.7208 | 4.532952917 |
| UIJ66610.1 | amidophosphoribosyltransferase [Bacillus cereus]                                                            | CPTF_Mn         | 4562538.7   | 513646.717  | 11.25791474 |
| UIJ66610.1 | amidophosphoribosyltransferase [Bacillus cereus]                                                            | CPTF_Ni         | 4202355.233 | 311759.4954 | 7.418684953 |
| UIJ66610.1 | amidophosphoribosyltransferase [Bacillus cereus]                                                            | CPTF_U          | 4183794.967 | 380429.3478 | 9.092925222 |
| UIJ66610.1 | amidophosphoribosyltransferase [Bacillus cereus]                                                            | CPTF_metals_mix | 3969923.433 | 424271.946  | 10.6871569  |
| UIJ66610.1 | amidophosphoribosyltransferase [Bacillus cereus]                                                            | CPTF_zcontrol   | 4446673.367 | 147405.8507 | 3.314969159 |
| UIJ66611.1 | phosphoribosylformylglycinamide cyclo-ligase [Bacillus cereus]                                              | CPTF_Al         | 2877786.933 | 321591.1061 | 11.17494497 |
| UIJ66611.1 | phosphoribosylformylglycinamide cyclo-ligase [Bacillus cereus]                                              | CPTF_Cd         | 3584012.533 | 234985.6649 | 6.55649674  |
| UIJ66611.1 | phosphoribosylformylglycinamide cyclo-ligase [Bacillus cereus]                                              | CPTF_Co         | 3174173.5   | 79184.26335 | 2.494641939 |
| UIJ66611.1 | phosphoribosylformylglycinamide cyclo-ligase [Bacillus cereus]                                              | CPTF_Cu         | 2392172.167 | 506157.2447 | 21.158897   |
| UIJ66611.1 | phosphoribosylformylglycinamide cyclo-ligase [Bacillus cereus]                                              | CPTF_Fe         | 3973204.5   | 453992.3523 | 11.42635252 |
| UIJ66611.1 | phosphoribosylformylglycinamide cyclo-ligase [Bacillus cereus]                                              | CPTF_Mn         | 3610856.133 | 1693954.74  | 46.91282836 |
| UIJ66611.1 | phosphoribosylformylglycinamide cyclo-ligase [Bacillus cereus]                                              | CPTF_Ni         | 2614013.167 | 178583.2269 | 6.83176463  |
| UIJ66611.1 | phosphoribosylformylglycinamide cyclo-ligase [Bacillus cereus]                                              | CPTF_U          | 3122666.5   | 226651.3953 | 7.25826454  |
| UIJ66611.1 | phosphoribosylformylglycinamide cyclo-ligase [Bacillus cereus]                                              | CPTF_metals_mix | 4732055.7   | 1153405.639 | 24.37430394 |
| UIJ66611.1 | phosphoribosylformylglycinamide cyclo-ligase [Bacillus cereus]                                              | CPTF_zcontrol   | 3079186.433 | 558766.7766 | 18.14657179 |
| UIJ66612.1 | phosphoribosylglycinamide formyltransferase [Bacillus cereus]                                               | CPTF_Al         | 52945.33333 | 91704.00736 | 173.2058088 |
| UIJ66612.1 | phosphoribosylglycinamide formyltransferase [Bacillus cereus]                                               | CPTF_Cd         | 0           | 0           | 0           |
| UIJ66612.1 | phosphoribosylglycinamide formyltransferase [Bacillus cereus]                                               | CPTF_Co         | 166330.3333 | 288092.5882 | 173.2058088 |
| UIJ66612.1 | phosphoribosylglycinamide formyltransferase [Bacillus cereus]                                               | CPTF_Cu         | 0           | 0           | 0           |
| UIJ66612.1 | phosphoribosylglycinamide formyltransferase [Bacillus cereus]                                               | CPTF_Fe         | 117433.3333 | 203400.4998 | 173.2058088 |
| UIJ66612.1 | phosphoribosylglycinamide formyltransferase [Bacillus cereus]                                               | CPTF_Mn         | 0           | 0           | 0           |
| UIJ66612.1 | phosphoribosylglycinamide formyltransferase [Bacillus cereus]                                               | CPTF_Ni         | 0           | 0           | 0           |
| UIJ66612.1 | phosphoribosylglycinamide formyltransferase [Bacillus cereus]                                               | CPTF_U          | 0           | 0           | 0           |
| UIJ66612.1 | phosphoribosylglycinamide formyltransferase [Bacillus cereus]                                               | CPTF_metals_mix | 151021.8333 | 236049.1959 | 156.3013709 |
| UIJ66612.1 | phosphoribosylglycinamide formyltransferase [Bacillus cereus]                                               | CPTF_zcontrol   | 0           | 0           | 0           |
| UIJ66613.1 | bifunctional_phosphoribosylaminoimidazolecarboxamide_formyltransferase/IMP_cyclohydrolase [Bacillus cereus] | CPTF_Al         | 17545487.77 | 382940.9436 | 2.182560831 |
| UIJ66613.1 | bifunctional_phosphoribosylaminoimidazolecarboxamide_formyltransferase/IMP_cyclohydrolase [Bacillus cereus] | CPTF_Cd         | 18515274.4  | 1660491.768 | 8.968226625 |
| UIJ66613.1 | bifunctional_phosphoribosylaminoimidazolecarboxamide_formyltransferase/IMP_cyclohydrolase [Bacillus cereus] | CPTF_Co         | 17937258.1  | 1275853.675 | 7.112869021 |
| UIJ66613.1 | bifunctional_phosphoribosylaminoimidazolecarboxamide_formyltransferase/IMP_cyclohydrolase [Bacillus cereus] | CPTF_Cu         | 14166533.27 | 1371891.944 | 9.684034321 |
| UIJ66613.1 | bifunctional_phosphoribosylaminoimidazolecarboxamide_formyltransferase/IMP_cyclohydrolase [Bacillus cereus] | CPTF_Fe         | 19385506.8  | 1556872.446 | 8.031115525 |
| UIJ66613.1 | bifunctional_phosphoribosylaminoimidazolecarboxamide_formyltransferase/IMP_cyclohydrolase [Bacillus cereus] | CPTF_Mn         | 17807386.67 | 1826037.256 | 10.25438089 |
| UIJ66613.1 | bifunctional_phosphoribosylaminoimidazolecarboxamide_formyltransferase/IMP_cyclohydrolase [Bacillus cereus] | CPTF_Ni         | 15883657.27 | 1340899.648 | 8.442008194 |
| UIJ66613.1 | bifunctional_phosphoribosylaminoimidazolecarboxamide_formyltransferase/IMP_cyclohydrolase [Bacillus cereus] | CPTF_U          | 15636471.53 | 1628044.883 | 10.4118431  |
| UIJ66613.1 | bifunctional_phosphoribosylaminoimidazolecarboxamide_formyltransferase/IMP_cyclohydrolase [Bacillus cereus] | CPTF_metals_mix | 10767119.97 | 792748.1522 | 7.362675949 |
| UIJ66613.1 | bifunctional_phosphoribosylaminoimidazolecarboxamide_formyltransferase/IMP_cyclohydrolase [Bacillus cereus] | CPTF_zcontrol   | 17420831.8  | 1472597.186 | 8.453081936 |
| UIJ66614.1 | phosphoribosylamine--glycine_ligase [Bacillus cereus]                                                       | CPTF_Al         | 4981294.233 | 420798.3845 | 8.447571349 |
| UIJ66614.1 | phosphoribosylamine--glycine_ligase [Bacillus cereus]                                                       | CPTF_Cd         | 5041546.1   | 252146.936  | 5.001381144 |
| UIJ66614.1 | phosphoribosylamine--glycine_ligase [Bacillus cereus]                                                       | CPTF_Co         | 4952097.767 | 583794.693  | 11.78883618 |
| UIJ66614.1 | phosphoribosylamine--glycine_ligase [Bacillus cereus]                                                       | CPTF_Cu         | 3774204.6   | 345952.7513 | 9.166242639 |
| UIJ66614.1 | phosphoribosylamine--glycine_ligase [Bacillus cereus]                                                       | CPTF_Fe         | 4716198.2   | 827409.6238 | 17.543996   |
| UIJ66614.1 | phosphoribosylamine--glycine_ligase [Bacillus cereus]                                                       | CPTF_Mn         | 5216415.633 | 1966591.041 | 37.700045   |
| UIJ66614.1 | phosphoribosylamine--glycine_ligase [Bacillus cereus]                                                       | CPTF_Ni         | 4003239.933 | 116846.9279 | 2.91880901  |
| UIJ66614.1 | phosphoribosylamine--glycine_ligase [Bacillus cereus]                                                       | CPTF_U          | 4014199.8   | 688518.0264 | 17.1520617  |
| UIJ66614.1 | phosphoribosylamine--glycine_ligase [Bacillus cereus]                                                       | CPTF_metals_mix | 6166164.833 | 715037.7321 | 11.59615014 |
| UIJ66614.1 | phosphoribosylamine--glycine_ligase [Bacillus cereus]                                                       | CPTF_zcontrol   | 5565157.567 | 605570.5848 | 10.88146342 |
| UIJ66616.1 | SPFH_domain-containing_protein [Bacillus cereus]                                                            | CPTF_Al         | 250739.8667 | 121677.9591 | 48.52756792 |
| UIJ66616.1 | SPFH_domain-containing_protein [Bacillus cereus]                                                            | CPTF_Cd         | 306403.7667 | 89790.34282 | 29.30458192 |
| UIJ66616.1 | SPFH_domain-containing_protein [Bacillus cereus]                                                            | CPTF_Co         | 297914.5667 | 42658.90828 | 14.31917504 |
| UIJ66616.1 | SPFH_domain-containing_protein [Bacillus cereus]                                                            | CPTF_Cu         | 346535.1333 | 107829.7201 | 31.11653327 |
| UIJ66616.1 | SPFH_domain-containing_protein [Bacillus cereus]                                                            | CPTF_Fe         | 208234.7    | 6583.667201 | 3.161657111 |
| UIJ66616.1 | SPFH_domain-containing_protein [Bacillus cereus]                                                            | CPTF_Mn         | 217366.6667 | 44764.77759 | 20.59413169 |
| UIJ66616.1 | SPFH_domain-containing_protein [Bacillus cereus]                                                            | CPTF_Ni         | 109566.6333 | 151858.715  | 138.5994169 |
| UIJ66616.1 | SPFH_domain-containing_protein [Bacillus cereus]                                                            | CPTF_U          | 247626.3    | 172863.3608 | 69.80815881 |
| UIJ66616.1 | SPFH_domain-containing_protein [Bacillus cereus]                                                            | CPTF_metals_mix | 485760.7333 | 104184.9913 | 21.44780016 |



|            |                                                                                       |                 |             |             |             |
|------------|---------------------------------------------------------------------------------------|-----------------|-------------|-------------|-------------|
| UIJ66616.1 | SPFH_domain-containing_protein_[ <i>Bacillus_cereus</i> ]                             | CPTF_zcontrol   | 182235.6667 | 59706.70483 | 32.7634573  |
| UIJ66619.1 | DNA_helicase_PcrA_[ <i>Bacillus_cereus</i> ]                                          | CPTF_Al         | 359160.6667 | 288367.1764 | 80.28918618 |
| UIJ66619.1 | DNA_helicase_PcrA_[ <i>Bacillus_cereus</i> ]                                          | CPTF_Cd         | 419278.3333 | 355019.509  | 84.67394586 |
| UIJ66619.1 | DNA_helicase_PcrA_[ <i>Bacillus_cereus</i> ]                                          | CPTF_Co         | 491011.3333 | 452689.2769 | 92.19528068 |
| UIJ66619.1 | DNA_helicase_PcrA_[ <i>Bacillus_cereus</i> ]                                          | CPTF_Cu         | 522624.6667 | 77841.2427  | 14.89429177 |
| UIJ66619.1 | DNA_helicase_PcrA_[ <i>Bacillus_cereus</i> ]                                          | CPTF_Fe         | 323426.6667 | 124062.0848 | 38.35864435 |
| UIJ66619.1 | DNA_helicase_PcrA_[ <i>Bacillus_cereus</i> ]                                          | CPTF_Mn         | 254274.1333 | 177171.6087 | 69.67740148 |
| UIJ66619.1 | DNA_helicase_PcrA_[ <i>Bacillus_cereus</i> ]                                          | CPTF_Ni         | 397764.3333 | 160604.3165 | 40.37675152 |
| UIJ66619.1 | DNA_helicase_PcrA_[ <i>Bacillus_cereus</i> ]                                          | CPTF_U          | 526503.6667 | 189719.8941 | 36.03391698 |
| UIJ66619.1 | DNA_helicase_PcrA_[ <i>Bacillus_cereus</i> ]                                          | CPTF_metals_mix | 491399.4333 | 73820.97052 | 15.02259985 |
| UIJ66619.1 | DNA_helicase_PcrA_[ <i>Bacillus_cereus</i> ]                                          | CPTF_zcontrol   | 434277.3333 | 171645.3143 | 39.52435487 |
| UIJ66620.1 | NAD-dependent_DNA_ligase_LigA_[ <i>Bacillus_cereus</i> ]                              | CPTF_Al         | 495104.6667 | 213768.4332 | 43.1764125  |
| UIJ66620.1 | NAD-dependent_DNA_ligase_LigA_[ <i>Bacillus_cereus</i> ]                              | CPTF_Cd         | 474066.1333 | 265319.9625 | 55.96686703 |
| UIJ66620.1 | NAD-dependent_DNA_ligase_LigA_[ <i>Bacillus_cereus</i> ]                              | CPTF_Co         | 684847.5333 | 36981.26704 | 5.399927026 |
| UIJ66620.1 | NAD-dependent_DNA_ligase_LigA_[ <i>Bacillus_cereus</i> ]                              | CPTF_Cu         | 578959.9333 | 344692.6508 | 59.53652938 |
| UIJ66620.1 | NAD-dependent_DNA_ligase_LigA_[ <i>Bacillus_cereus</i> ]                              | CPTF_Fe         | 403715.2    | 180036.795  | 44.59500039 |
| UIJ66620.1 | NAD-dependent_DNA_ligase_LigA_[ <i>Bacillus_cereus</i> ]                              | CPTF_Mn         | 245818.9    | 267259.3064 | 108.7220333 |
| UIJ66620.1 | NAD-dependent_DNA_ligase_LigA_[ <i>Bacillus_cereus</i> ]                              | CPTF_Ni         | 433256.3667 | 236479.7969 | 54.58195543 |
| UIJ66620.1 | NAD-dependent_DNA_ligase_LigA_[ <i>Bacillus_cereus</i> ]                              | CPTF_U          | 368486.1333 | 36605.51991 | 9.934029153 |
| UIJ66620.1 | NAD-dependent_DNA_ligase_LigA_[ <i>Bacillus_cereus</i> ]                              | CPTF_metals_mix | 827099.9    | 93075.24297 | 11.25320448 |
| UIJ66620.1 | NAD-dependent_DNA_ligase_LigA_[ <i>Bacillus_cereus</i> ]                              | CPTF_zcontrol   | 359002.8333 | 84647.50239 | 23.57850538 |
| UIJ66623.1 | L-glutamate_gamma-semialdehyde_dehydrogenase_[ <i>Bacillus_cereus</i> ]               | CPTF_Al         | 32805186.6  | 226585.158  | 6.907002803 |
| UIJ66623.1 | L-glutamate_gamma-semialdehyde_dehydrogenase_[ <i>Bacillus_cereus</i> ]               | CPTF_Cd         | 36144526.67 | 1462614.944 | 4.046573795 |
| UIJ66623.1 | L-glutamate_gamma-semialdehyde_dehydrogenase_[ <i>Bacillus_cereus</i> ]               | CPTF_Co         | 29216445.47 | 2783545.135 | 9.527323022 |
| UIJ66623.1 | L-glutamate_gamma-semialdehyde_dehydrogenase_[ <i>Bacillus_cereus</i> ]               | CPTF_Cu         | 27682571.27 | 1459144.593 | 5.270986497 |
| UIJ66623.1 | L-glutamate_gamma-semialdehyde_dehydrogenase_[ <i>Bacillus_cereus</i> ]               | CPTF_Fe         | 32748846.47 | 3974924.556 | 12.13760173 |
| UIJ66623.1 | L-glutamate_gamma-semialdehyde_dehydrogenase_[ <i>Bacillus_cereus</i> ]               | CPTF_Mn         | 33643219.03 | 4273422.297 | 12.70218017 |
| UIJ66623.1 | L-glutamate_gamma-semialdehyde_dehydrogenase_[ <i>Bacillus_cereus</i> ]               | CPTF_Ni         | 25312411.4  | 1473103.718 | 5.819689381 |
| UIJ66623.1 | L-glutamate_gamma-semialdehyde_dehydrogenase_[ <i>Bacillus_cereus</i> ]               | CPTF_U          | 26355503.47 | 2506437.978 | 9.510112306 |
| UIJ66623.1 | L-glutamate_gamma-semialdehyde_dehydrogenase_[ <i>Bacillus_cereus</i> ]               | CPTF_metals_mix | 29031103.7  | 2603220.158 | 8.967003753 |
| UIJ66623.1 | L-glutamate_gamma-semialdehyde_dehydrogenase_[ <i>Bacillus_cereus</i> ]               | CPTF_zcontrol   | 30325924.43 | 2377206.173 | 7.838858063 |
| UIJ66627.1 | MetQ/NlpA_family_ABC_transporter_substrate-binding_protein_[ <i>Bacillus_cereus</i> ] | CPTF_Al         | 272287.3333 | 60451.24701 | 22.20127035 |
| UIJ66627.1 | MetQ/NlpA_family_ABC_transporter_substrate-binding_protein_[ <i>Bacillus_cereus</i> ] | CPTF_Cd         | 310991.3333 | 88528.0646  | 28.4664089  |
| UIJ66627.1 | MetQ/NlpA_family_ABC_transporter_substrate-binding_protein_[ <i>Bacillus_cereus</i> ] | CPTF_Co         | 270816.1667 | 32352.84464 | 11.94642293 |
| UIJ66627.1 | MetQ/NlpA_family_ABC_transporter_substrate-binding_protein_[ <i>Bacillus_cereus</i> ] | CPTF_Cu         | 322638.6667 | 116975.6019 | 36.25591537 |
| UIJ66627.1 | MetQ/NlpA_family_ABC_transporter_substrate-binding_protein_[ <i>Bacillus_cereus</i> ] | CPTF_Fe         | 306252.4667 | 69622.62184 | 22.73373423 |
| UIJ66627.1 | MetQ/NlpA_family_ABC_transporter_substrate-binding_protein_[ <i>Bacillus_cereus</i> ] | CPTF_Mn         | 242399      | 77363.22104 | 31.91565189 |
| UIJ66627.1 | MetQ/NlpA_family_ABC_transporter_substrate-binding_protein_[ <i>Bacillus_cereus</i> ] | CPTF_Ni         | 326230      | 9828.889205 | 3.012871043 |
| UIJ66627.1 | MetQ/NlpA_family_ABC_transporter_substrate-binding_protein_[ <i>Bacillus_cereus</i> ] | CPTF_U          | 317828.3333 | 68934.30927 | 21.68916426 |
| UIJ66627.1 | MetQ/NlpA_family_ABC_transporter_substrate-binding_protein_[ <i>Bacillus_cereus</i> ] | CPTF_metals_mix | 183580.6667 | 27077.75612 | 14.74978635 |
| UIJ66627.1 | MetQ/NlpA_family_ABC_transporter_substrate-binding_protein_[ <i>Bacillus_cereus</i> ] | CPTF_zcontrol   | 331537      | 49140.28939 | 14.82196237 |
| UIJ66629.1 | Asp-tRNA(Asn)/Glu-tRNA(Gln)_amidotransferase_subunit_GatC_[ <i>Bacillus_cereus</i> ]  | CPTF_Al         | 575524.3333 | 500916.3057 | 87.03651205 |
| UIJ66629.1 | Asp-tRNA(Asn)/Glu-tRNA(Gln)_amidotransferase_subunit_GatC_[ <i>Bacillus_cereus</i> ]  | CPTF_Cd         | 738755.6667 | 55184.12495 | 7.469875013 |
| UIJ66629.1 | Asp-tRNA(Asn)/Glu-tRNA(Gln)_amidotransferase_subunit_GatC_[ <i>Bacillus_cereus</i> ]  | CPTF_Co         | 874414      | 120339.3858 | 13.76228947 |
| UIJ66629.1 | Asp-tRNA(Asn)/Glu-tRNA(Gln)_amidotransferase_subunit_GatC_[ <i>Bacillus_cereus</i> ]  | CPTF_Cu         | 839855.3333 | 49996.76798 | 5.953021431 |
| UIJ66629.1 | Asp-tRNA(Asn)/Glu-tRNA(Gln)_amidotransferase_subunit_GatC_[ <i>Bacillus_cereus</i> ]  | CPTF_Fe         | 261793.3333 | 453439.3544 | 173.2050808 |
| UIJ66629.1 | Asp-tRNA(Asn)/Glu-tRNA(Gln)_amidotransferase_subunit_GatC_[ <i>Bacillus_cereus</i> ]  | CPTF_Mn         | 876790      | 140400.1373 | 16.01297201 |
| UIJ66629.1 | Asp-tRNA(Asn)/Glu-tRNA(Gln)_amidotransferase_subunit_GatC_[ <i>Bacillus_cereus</i> ]  | CPTF_Ni         | 292159.6667 | 506035.3866 | 173.2050808 |
| UIJ66629.1 | Asp-tRNA(Asn)/Glu-tRNA(Gln)_amidotransferase_subunit_GatC_[ <i>Bacillus_cereus</i> ]  | CPTF_U          | 613325      | 532484.0267 | 86.81922745 |
| UIJ66629.1 | Asp-tRNA(Asn)/Glu-tRNA(Gln)_amidotransferase_subunit_GatC_[ <i>Bacillus_cereus</i> ]  | CPTF_metals_mix | 486051.6667 | 8812.271973 | 1.813031942 |
| UIJ66629.1 | Asp-tRNA(Asn)/Glu-tRNA(Gln)_amidotransferase_subunit_GatC_[ <i>Bacillus_cereus</i> ]  | CPTF_zcontrol   | 876645.6667 | 115847.8933 | 13.21490514 |
| UIJ66630.1 | Asp-tRNA(Asn)/Glu-tRNA(Gln)_amidotransferase_subunit_GatA_[ <i>Bacillus_cereus</i> ]  | CPTF_Al         | 3139410.833 | 253591.5835 | 8.077680717 |
| UIJ66630.1 | Asp-tRNA(Asn)/Glu-tRNA(Gln)_amidotransferase_subunit_GatA_[ <i>Bacillus_cereus</i> ]  | CPTF_Cd         | 3322562.4   | 49015.73885 | 1.475239076 |
| UIJ66630.1 | Asp-tRNA(Asn)/Glu-tRNA(Gln)_amidotransferase_subunit_GatA_[ <i>Bacillus_cereus</i> ]  | CPTF_Co         | 3296014.233 | 288895.0074 | 8.764980578 |
| UIJ66630.1 | Asp-tRNA(Asn)/Glu-tRNA(Gln)_amidotransferase_subunit_GatA_[ <i>Bacillus_cereus</i> ]  | CPTF_Cu         | 2977320.3   | 190122.3871 | 6.385688065 |
| UIJ66630.1 | Asp-tRNA(Asn)/Glu-tRNA(Gln)_amidotransferase_subunit_GatA_[ <i>Bacillus_cereus</i> ]  | CPTF_Fe         | 2957055.1   | 100594.2166 | 3.401877348 |
| UIJ66630.1 | Asp-tRNA(Asn)/Glu-tRNA(Gln)_amidotransferase_subunit_GatA_[ <i>Bacillus_cereus</i> ]  | CPTF_Mn         | 2990495     | 291596.1443 | 9.75076515  |
| UIJ66630.1 | Asp-tRNA(Asn)/Glu-tRNA(Gln)_amidotransferase_subunit_GatA_[ <i>Bacillus_cereus</i> ]  | CPTF_Ni         | 2910844.033 | 19650.81214 | 0.675089834 |
| UIJ66630.1 | Asp-tRNA(Asn)/Glu-tRNA(Gln)_amidotransferase_subunit_GatA_[ <i>Bacillus_cereus</i> ]  | CPTF_U          | 2820765     | 586784.3196 | 20.80231141 |
| UIJ66630.1 | Asp-tRNA(Asn)/Glu-tRNA(Gln)_amidotransferase_subunit_GatA_[ <i>Bacillus_cereus</i> ]  | CPTF_metals_mix | 4028035.467 | 385442.0928 | 9.568984583 |
| UIJ66630.1 | Asp-tRNA(Asn)/Glu-tRNA(Gln)_amidotransferase_subunit_GatA_[ <i>Bacillus_cereus</i> ]  | CPTF_zcontrol   | 3406577.667 | 340123.7274 | 9.984323292 |

|            |                                                                             |                 |             |             |             |
|------------|-----------------------------------------------------------------------------|-----------------|-------------|-------------|-------------|
| UIJ66631.1 | Asp-tRNA(Asn)/Glu-tRNA(Gln)_amidotransferase_subunit_GatB_[Bacillus_cereus] | CPTF_Al         | 4253772.133 | 577487.4261 | 13.57589001 |
| UIJ66631.1 | Asp-tRNA(Asn)/Glu-tRNA(Gln)_amidotransferase_subunit_GatB_[Bacillus_cereus] | CPTF_Cd         | 5026564.733 | 197712.127  | 3.933344888 |
| UIJ66631.1 | Asp-tRNA(Asn)/Glu-tRNA(Gln)_amidotransferase_subunit_GatB_[Bacillus_cereus] | CPTF_Co         | 4908752.2   | 525397.9669 | 10.70328966 |
| UIJ66631.1 | Asp-tRNA(Asn)/Glu-tRNA(Gln)_amidotransferase_subunit_GatB_[Bacillus_cereus] | CPTF_Cu         | 4517111.867 | 220516.5708 | 4.88180451  |
| UIJ66631.1 | Asp-tRNA(Asn)/Glu-tRNA(Gln)_amidotransferase_subunit_GatB_[Bacillus_cereus] | CPTF_Fe         | 4576857.167 | 223642.7248 | 4.886382002 |
| UIJ66631.1 | Asp-tRNA(Asn)/Glu-tRNA(Gln)_amidotransferase_subunit_GatB_[Bacillus_cereus] | CPTF_Mn         | 3683660.667 | 467372.6126 | 12.68772167 |
| UIJ66631.1 | Asp-tRNA(Asn)/Glu-tRNA(Gln)_amidotransferase_subunit_GatB_[Bacillus_cereus] | CPTF_Ni         | 4573335.633 | 143968.8511 | 3.148005365 |
| UIJ66631.1 | Asp-tRNA(Asn)/Glu-tRNA(Gln)_amidotransferase_subunit_GatB_[Bacillus_cereus] | CPTF_U          | 3896650.033 | 538028.2704 | 13.80745681 |
| UIJ66631.1 | Asp-tRNA(Asn)/Glu-tRNA(Gln)_amidotransferase_subunit_GatB_[Bacillus_cereus] | CPTF_metals_mix | 4500701.5   | 1134660.316 | 25.2107436  |
| UIJ66631.1 | Asp-tRNA(Asn)/Glu-tRNA(Gln)_amidotransferase_subunit_GatB_[Bacillus_cereus] | CPTF_zcontrol   | 4157895.5   | 457851.6073 | 11.01161891 |
| UIJ66632.1 | diacylglycerol_kinase_[Bacillus_cereus]                                     | CPTF_Al         | 1111037.667 | 123909.9603 | 11.15263361 |
| UIJ66632.1 | diacylglycerol_kinase_[Bacillus_cereus]                                     | CPTF_Cd         | 1200233.667 | 183976.5577 | 15.32839503 |
| UIJ66632.1 | diacylglycerol_kinase_[Bacillus_cereus]                                     | CPTF_Co         | 1072562.033 | 195526.1154 | 18.22981882 |
| UIJ66632.1 | diacylglycerol_kinase_[Bacillus_cereus]                                     | CPTF_Cu         | 907642.3333 | 311369.9115 | 34.30535356 |
| UIJ66632.1 | diacylglycerol_kinase_[Bacillus_cereus]                                     | CPTF_Fe         | 1139884.333 | 221331.5919 | 19.41702201 |
| UIJ66632.1 | diacylglycerol_kinase_[Bacillus_cereus]                                     | CPTF_Mn         | 978317.6667 | 127973.916  | 13.0810186  |
| UIJ66632.1 | diacylglycerol_kinase_[Bacillus_cereus]                                     | CPTF_Ni         | 973038.6667 | 188819.2355 | 19.40511122 |
| UIJ66632.1 | diacylglycerol_kinase_[Bacillus_cereus]                                     | CPTF_U          | 726529.7667 | 189465.4881 | 26.07814528 |
| UIJ66632.1 | diacylglycerol_kinase_[Bacillus_cereus]                                     | CPTF_metals_mix | 1554864.667 | 465555.7963 | 29.94188538 |
| UIJ66632.1 | diacylglycerol_kinase_[Bacillus_cereus]                                     | CPTF_zcontrol   | 879574      | 236535.6668 | 26.89207125 |
| UIJ66639.1 | aminopeptidase_[Bacillus_cereus]                                            | CPTF_Al         | 8909142.1   | 609698.66   | 6.843517066 |
| UIJ66639.1 | aminopeptidase_[Bacillus_cereus]                                            | CPTF_Cd         | 9778112.933 | 411125.6309 | 4.204549832 |
| UIJ66639.1 | aminopeptidase_[Bacillus_cereus]                                            | CPTF_Co         | 8707487.3   | 232298.0814 | 2.667796959 |
| UIJ66639.1 | aminopeptidase_[Bacillus_cereus]                                            | CPTF_Cu         | 8042425.167 | 457893.3829 | 5.693473964 |
| UIJ66639.1 | aminopeptidase_[Bacillus_cereus]                                            | CPTF_Fe         | 8890008.933 | 371406.0787 | 4.177791962 |
| UIJ66639.1 | aminopeptidase_[Bacillus_cereus]                                            | CPTF_Mn         | 8630130.3   | 725785.2464 | 8.409899053 |
| UIJ66639.1 | aminopeptidase_[Bacillus_cereus]                                            | CPTF_Ni         | 6251743.467 | 553855.6161 | 8.859218537 |
| UIJ66639.1 | aminopeptidase_[Bacillus_cereus]                                            | CPTF_U          | 7858127.267 | 1117107.22  | 14.21594716 |
| UIJ66639.1 | aminopeptidase_[Bacillus_cereus]                                            | CPTF_metals_mix | 7502722.8   | 248933.1529 | 3.318103187 |
| UIJ66639.1 | aminopeptidase_[Bacillus_cereus]                                            | CPTF_zcontrol   | 8648995.733 | 540973.7269 | 6.254757703 |
| UIJ66642.1 | AimR_family_lys-lysogeny_pheromone_receptor_[Bacillus_cereus]               | CPTF_Al         | 100216.4667 | 23727.312   | 23.67606122 |
| UIJ66642.1 | AimR_family_lys-lysogeny_pheromone_receptor_[Bacillus_cereus]               | CPTF_Cd         | 611262.0333 | 11546.58484 | 1.888974648 |
| UIJ66642.1 | AimR_family_lys-lysogeny_pheromone_receptor_[Bacillus_cereus]               | CPTF_Co         | 44938.33333 | 77835.47654 | 173.2050808 |
| UIJ66642.1 | AimR_family_lys-lysogeny_pheromone_receptor_[Bacillus_cereus]               | CPTF_Cu         | 42700.6     | 37543.01784 | 87.92152297 |
| UIJ66642.1 | AimR_family_lys-lysogeny_pheromone_receptor_[Bacillus_cereus]               | CPTF_Fe         | 126773.6667 | 125040.138  | 98.63257981 |
| UIJ66642.1 | AimR_family_lys-lysogeny_pheromone_receptor_[Bacillus_cereus]               | CPTF_Mn         | 26671.96667 | 46197.2014  | 173.2050808 |
| UIJ66642.1 | AimR_family_lys-lysogeny_pheromone_receptor_[Bacillus_cereus]               | CPTF_Ni         | 61780.53333 | 63657.43163 | 103.0380092 |
| UIJ66642.1 | AimR_family_lys-lysogeny_pheromone_receptor_[Bacillus_cereus]               | CPTF_U          | 29144       | 50478.88874 | 173.2050808 |
| UIJ66642.1 | AimR_family_lys-lysogeny_pheromone_receptor_[Bacillus_cereus]               | CPTF_metals_mix | 0           | 0           | 0           |
| UIJ66642.1 | AimR_family_lys-lysogeny_pheromone_receptor_[Bacillus_cereus]               | CPTF_zcontrol   | 0           | 0           | 0           |
| UIJ66686.1 | DUF262_domain-containing_protein_[Bacillus_cereus]                          | CPTF_Al         | 27997.46667 | 2771.904295 | 9.900553963 |
| UIJ66686.1 | DUF262_domain-containing_protein_[Bacillus_cereus]                          | CPTF_Cd         | 23032.4     | 21117.43758 | 91.68578861 |
| UIJ66686.1 | DUF262_domain-containing_protein_[Bacillus_cereus]                          | CPTF_Co         | 23818.56667 | 2614.74338  | 10.97775285 |
| UIJ66686.1 | DUF262_domain-containing_protein_[Bacillus_cereus]                          | CPTF_Cu         | 18366.43333 | 16766.5997  | 91.28936141 |
| UIJ66686.1 | DUF262_domain-containing_protein_[Bacillus_cereus]                          | CPTF_Fe         | 18462.66667 | 16137.51357 | 87.40619035 |
| UIJ66686.1 | DUF262_domain-containing_protein_[Bacillus_cereus]                          | CPTF_Mn         | 9321.366667 | 16145.08066 | 173.2050808 |
| UIJ66686.1 | DUF262_domain-containing_protein_[Bacillus_cereus]                          | CPTF_Ni         | 29608.5     | 4399.038022 | 14.85734847 |
| UIJ66686.1 | DUF262_domain-containing_protein_[Bacillus_cereus]                          | CPTF_U          | 8461.133333 | 14655.11282 | 173.2050808 |
| UIJ66686.1 | DUF262_domain-containing_protein_[Bacillus_cereus]                          | CPTF_metals_mix | 19647.4     | 3729.444571 | 18.98187328 |
| UIJ66686.1 | DUF262_domain-containing_protein_[Bacillus_cereus]                          | CPTF_zcontrol   | 27750.13333 | 6611.545761 | 23.82527565 |
| UIJ66687.1 | DUF3696_domain-containing_protein_[Bacillus_cereus]                         | CPTF_Al         | 253491.0667 | 77580.23307 | 30.60472075 |
| UIJ66687.1 | DUF3696_domain-containing_protein_[Bacillus_cereus]                         | CPTF_Cd         | 169845.4333 | 109470.7425 | 64.45315622 |
| UIJ66687.1 | DUF3696_domain-containing_protein_[Bacillus_cereus]                         | CPTF_Co         | 80823.93333 | 71749.17945 | 88.77219469 |
| UIJ66687.1 | DUF3696_domain-containing_protein_[Bacillus_cereus]                         | CPTF_Cu         | 124380.3667 | 78298.58346 | 62.95091867 |
| UIJ66687.1 | DUF3696_domain-containing_protein_[Bacillus_cereus]                         | CPTF_Fe         | 190362.2667 | 37338.42795 | 19.61440605 |
| UIJ66687.1 | DUF3696_domain-containing_protein_[Bacillus_cereus]                         | CPTF_Mn         | 114817      | 99471.89446 | 86.63516244 |
| UIJ66687.1 | DUF3696_domain-containing_protein_[Bacillus_cereus]                         | CPTF_Ni         | 138274      | 119809.1378 | 86.64617921 |
| UIJ66687.1 | DUF3696_domain-containing_protein_[Bacillus_cereus]                         | CPTF_U          | 159734.1    | 57489.12447 | 35.99051453 |
| UIJ66687.1 | DUF3696_domain-containing_protein_[Bacillus_cereus]                         | CPTF_metals_mix | 166022.8    | 63224.83127 | 38.08201721 |
| UIJ66687.1 | DUF3696_domain-containing_protein_[Bacillus_cereus]                         | CPTF_zcontrol   | 196956.5667 | 116098.2324 | 58.94610897 |
| UIJ66703.1 | dipeptide_epimerase_[Bacillus_cereus]                                       | CPTF_Al         | 0           | 0           | 0           |

|            |                                                                              |                 |             |             |              |
|------------|------------------------------------------------------------------------------|-----------------|-------------|-------------|--------------|
| UIJ66703.1 | dipeptide_epimerase_[Bacillus_cereus]                                        | CPTF_Cd         | 0           | 0           | 0            |
| UIJ66703.1 | dipeptide_epimerase_[Bacillus_cereus]                                        | CPTF_Co         | 0           | 0           | 0            |
| UIJ66703.1 | dipeptide_epimerase_[Bacillus_cereus]                                        | CPTF_Cu         | 0           | 0           | 0            |
| UIJ66703.1 | dipeptide_epimerase_[Bacillus_cereus]                                        | CPTF_Fe         | 25273.16667 | 43774.40873 | 173.2050808  |
| UIJ66703.1 | dipeptide_epimerase_[Bacillus_cereus]                                        | CPTF_Mn         | 20413.76667 | 35357.68104 | 173.2050808  |
| UIJ66703.1 | dipeptide_epimerase_[Bacillus_cereus]                                        | CPTF_Ni         | 0           | 0           | 0            |
| UIJ66703.1 | dipeptide_epimerase_[Bacillus_cereus]                                        | CPTF_U          | 0           | 0           | 0            |
| UIJ66703.1 | dipeptide_epimerase_[Bacillus_cereus]                                        | CPTF_metals_mix | 0           | 0           | 0            |
| UIJ66703.1 | dipeptide_epimerase_[Bacillus_cereus]                                        | CPTF_zcontrol   | 13773.9     | 23857.09462 | 173.2050808  |
| UIJ66706.1 | M20_peptidase_aminocyclase_family_protein_[Bacillus_cereus]                  | CPTF_Al         | 6274.5      | 10867.75279 | 173.2050808  |
| UIJ66706.1 | M20_peptidase_aminocyclase_family_protein_[Bacillus_cereus]                  | CPTF_Cd         | 0           | 0           | 0            |
| UIJ66706.1 | M20_peptidase_aminocyclase_family_protein_[Bacillus_cereus]                  | CPTF_Co         | 2842.583333 | 4923.498758 | 173.2050808  |
| UIJ66706.1 | M20_peptidase_aminocyclase_family_protein_[Bacillus_cereus]                  | CPTF_Cu         | 0           | 0           | 0            |
| UIJ66706.1 | M20_peptidase_aminocyclase_family_protein_[Bacillus_cereus]                  | CPTF_Fe         | 0           | 0           | 0            |
| UIJ66706.1 | M20_peptidase_aminocyclase_family_protein_[Bacillus_cereus]                  | CPTF_Mn         | 0           | 0           | 0            |
| UIJ66706.1 | M20_peptidase_aminocyclase_family_protein_[Bacillus_cereus]                  | CPTF_Ni         | 0           | 0           | 0            |
| UIJ66706.1 | M20_peptidase_aminocyclase_family_protein_[Bacillus_cereus]                  | CPTF_U          | 0           | 0           | 0            |
| UIJ66706.1 | M20_peptidase_aminocyclase_family_protein_[Bacillus_cereus]                  | CPTF_metals_mix | 77972.73333 | 44665.18788 | 57.28308598  |
| UIJ66706.1 | M20_peptidase_aminocyclase_family_protein_[Bacillus_cereus]                  | CPTF_zcontrol   | 0           | 0           | 0            |
| UIJ66708.1 | alkyl_hydroperoxide_reductase_subunit_F_[Bacillus_cereus]                    | CPTF_Al         | 2106747.3   | 159866.8036 | 7.588323649  |
| UIJ66708.1 | alkyl_hydroperoxide_reductase_subunit_F_[Bacillus_cereus]                    | CPTF_Cd         | 2195954.967 | 106808.395  | 4.863870005  |
| UIJ66708.1 | alkyl_hydroperoxide_reductase_subunit_F_[Bacillus_cereus]                    | CPTF_Co         | 2369633.433 | 165150.6452 | 6.9694959617 |
| UIJ66708.1 | alkyl_hydroperoxide_reductase_subunit_F_[Bacillus_cereus]                    | CPTF_Cu         | 3230568.9   | 181471.0867 | 5.617310522  |
| UIJ66708.1 | alkyl_hydroperoxide_reductase_subunit_F_[Bacillus_cereus]                    | CPTF_Fe         | 2149698.633 | 436425.0568 | 20.30168555  |
| UIJ66708.1 | alkyl_hydroperoxide_reductase_subunit_F_[Bacillus_cereus]                    | CPTF_Mn         | 2151133.667 | 346722.4462 | 16.11812653  |
| UIJ66708.1 | alkyl_hydroperoxide_reductase_subunit_F_[Bacillus_cereus]                    | CPTF_Ni         | 2358616.667 | 244514.9142 | 10.36687808  |
| UIJ66708.1 | alkyl_hydroperoxide_reductase_subunit_F_[Bacillus_cereus]                    | CPTF_U          | 1452044.633 | 990316.9616 | 68.20155103  |
| UIJ66708.1 | alkyl_hydroperoxide_reductase_subunit_F_[Bacillus_cereus]                    | CPTF_metals_mix | 7828124.033 | 1259687.46  | 16.09181784  |
| UIJ66708.1 | alkyl_hydroperoxide_reductase_subunit_F_[Bacillus_cereus]                    | CPTF_zcontrol   | 1943114.667 | 257826.7123 | 13.26873379  |
| UIJ66709.1 | peroxiredoxin_[Bacillus_cereus]                                              | CPTF_Al         | 10099693.8  | 316193.234  | 3.130720992  |
| UIJ66709.1 | peroxiredoxin_[Bacillus_cereus]                                              | CPTF_Cd         | 11635608    | 879963.8859 | 7.562680746  |
| UIJ66709.1 | peroxiredoxin_[Bacillus_cereus]                                              | CPTF_Co         | 10314822.47 | 579266.1505 | 5.615861566  |
| UIJ66709.1 | peroxiredoxin_[Bacillus_cereus]                                              | CPTF_Cu         | 12585841    | 1114202.961 | 8.852828837  |
| UIJ66709.1 | peroxiredoxin_[Bacillus_cereus]                                              | CPTF_Fe         | 9608066.333 | 603325.5701 | 6.279365162  |
| UIJ66709.1 | peroxiredoxin_[Bacillus_cereus]                                              | CPTF_Mn         | 11494477.33 | 3414430.36  | 29.70496405  |
| UIJ66709.1 | peroxiredoxin_[Bacillus_cereus]                                              | CPTF_Ni         | 9295454     | 702215.2236 | 7.554394046  |
| UIJ66709.1 | peroxiredoxin_[Bacillus_cereus]                                              | CPTF_U          | 7379712.267 | 1084525.372 | 14.69603872  |
| UIJ66709.1 | peroxiredoxin_[Bacillus_cereus]                                              | CPTF_metals_mix | 40165790.33 | 4105845.077 | 10.22224396  |
| UIJ66709.1 | peroxiredoxin_[Bacillus_cereus]                                              | CPTF_zcontrol   | 9251119.633 | 334789.8503 | 3.618911695  |
| UIJ66715.1 | iron-hydroxamate_ABC_transporter_substrate-binding_protein_[Bacillus_cereus] | CPTF_Al         | 0           | 0           | 0            |
| UIJ66715.1 | iron-hydroxamate_ABC_transporter_substrate-binding_protein_[Bacillus_cereus] | CPTF_Cd         | 0           | 0           | 0            |
| UIJ66715.1 | iron-hydroxamate_ABC_transporter_substrate-binding_protein_[Bacillus_cereus] | CPTF_Co         | 0           | 0           | 0            |
| UIJ66715.1 | iron-hydroxamate_ABC_transporter_substrate-binding_protein_[Bacillus_cereus] | CPTF_Cu         | 15790.53333 | 27350.00601 | 173.2050808  |
| UIJ66715.1 | iron-hydroxamate_ABC_transporter_substrate-binding_protein_[Bacillus_cereus] | CPTF_Fe         | 0           | 0           | 0            |
| UIJ66715.1 | iron-hydroxamate_ABC_transporter_substrate-binding_protein_[Bacillus_cereus] | CPTF_Mn         | 0           | 0           | 0            |
| UIJ66715.1 | iron-hydroxamate_ABC_transporter_substrate-binding_protein_[Bacillus_cereus] | CPTF_Ni         | 0           | 0           | 0            |
| UIJ66715.1 | iron-hydroxamate_ABC_transporter_substrate-binding_protein_[Bacillus_cereus] | CPTF_U          | 0           | 0           | 0            |
| UIJ66715.1 | iron-hydroxamate_ABC_transporter_substrate-binding_protein_[Bacillus_cereus] | CPTF_metals_mix | 1095552.3   | 61727.1789  | 5.634343418  |
| UIJ66715.1 | iron-hydroxamate_ABC_transporter_substrate-binding_protein_[Bacillus_cereus] | CPTF_zcontrol   | 0           | 0           | 0            |
| UIJ66716.1 | NAD(P)/FAD-dependent_oxidoreductase_[Bacillus_cereus]                        | CPTF_Al         | 0           | 0           | 0            |
| UIJ66716.1 | NAD(P)/FAD-dependent_oxidoreductase_[Bacillus_cereus]                        | CPTF_Cd         | 0           | 0           | 0            |
| UIJ66716.1 | NAD(P)/FAD-dependent_oxidoreductase_[Bacillus_cereus]                        | CPTF_Co         | 0           | 0           | 0            |
| UIJ66716.1 | NAD(P)/FAD-dependent_oxidoreductase_[Bacillus_cereus]                        | CPTF_Cu         | 0           | 0           | 0            |
| UIJ66716.1 | NAD(P)/FAD-dependent_oxidoreductase_[Bacillus_cereus]                        | CPTF_Fe         | 0           | 0           | 0            |
| UIJ66716.1 | NAD(P)/FAD-dependent_oxidoreductase_[Bacillus_cereus]                        | CPTF_Mn         | 0           | 0           | 0            |
| UIJ66716.1 | NAD(P)/FAD-dependent_oxidoreductase_[Bacillus_cereus]                        | CPTF_Ni         | 0           | 0           | 0            |
| UIJ66716.1 | NAD(P)/FAD-dependent_oxidoreductase_[Bacillus_cereus]                        | CPTF_U          | 0           | 0           | 0            |
| UIJ66716.1 | NAD(P)/FAD-dependent_oxidoreductase_[Bacillus_cereus]                        | CPTF_metals_mix | 467724.3333 | 113907.0172 | 24.35345119  |
| UIJ66716.1 | NAD(P)/FAD-dependent_oxidoreductase_[Bacillus_cereus]                        | CPTF_zcontrol   | 0           | 0           | 0            |
| UIJ66717.1 | hypothetical_protein_LW858_28775_[Bacillus_cereus]                           | CPTF_Al         | 216076      | 44430.61999 | 20.56249653  |
| UIJ66717.1 | hypothetical_protein_LW858_28775_[Bacillus_cereus]                           | CPTF_Cd         | 236535.3333 | 27624.15636 | 11.67865958  |

|            |                                                                    |                 |             |             |             |
|------------|--------------------------------------------------------------------|-----------------|-------------|-------------|-------------|
| UIJ66717.1 | hypothetical_protein_LW858_28775 [Bacillus cereus]                 | CPTF_Co         | 240445.6667 | 16345.84441 | 6.798144725 |
| UIJ66717.1 | hypothetical_protein_LW858_28775 [Bacillus cereus]                 | CPTF_Cu         | 202348      | 17693.66415 | 8.744175454 |
| UIJ66717.1 | hypothetical_protein_LW858_28775 [Bacillus cereus]                 | CPTF_Fe         | 194129      | 33865.01107 | 17.44459152 |
| UIJ66717.1 | hypothetical_protein_LW858_28775 [Bacillus cereus]                 | CPTF_Mn         | 187847      | 58761.18681 | 31.28140817 |
| UIJ66717.1 | hypothetical_protein_LW858_28775 [Bacillus cereus]                 | CPTF_Ni         | 179072      | 58305.85017 | 32.56000389 |
| UIJ66717.1 | hypothetical_protein_LW858_28775 [Bacillus cereus]                 | CPTF_U          | 225467.3333 | 53282.64784 | 23.63209209 |
| UIJ66717.1 | hypothetical_protein_LW858_28775 [Bacillus cereus]                 | CPTF_metals_mix | 144903.3333 | 24148.23425 | 16.6650647  |
| UIJ66717.1 | hypothetical_protein_LW858_28775 [Bacillus cereus]                 | CPTF_zcontrol   | 186150.6667 | 48342.2315  | 25.96941089 |
| UIJ66726.1 | nucleotidyltransferase_domain-containing_protein [Bacillus cereus] | CPTF_Al         | 534906      | 280635.6766 | 52.46448472 |
| UIJ66726.1 | nucleotidyltransferase_domain-containing_protein [Bacillus cereus] | CPTF_Cd         | 775321.6667 | 55462.36491 | 7.153465109 |
| UIJ66726.1 | nucleotidyltransferase_domain-containing_protein [Bacillus cereus] | CPTF_Co         | 346642.6667 | 263236.8889 | 75.93897526 |
| UIJ66726.1 | nucleotidyltransferase_domain-containing_protein [Bacillus cereus] | CPTF_Cu         | 553913      | 236952.1635 | 42.77786648 |
| UIJ66726.1 | nucleotidyltransferase_domain-containing_protein [Bacillus cereus] | CPTF_Fe         | 645950.6667 | 337077.8257 | 52.18321508 |
| UIJ66726.1 | nucleotidyltransferase_domain-containing_protein [Bacillus cereus] | CPTF_Mn         | 310799.3333 | 116060.9457 | 37.34272673 |
| UIJ66726.1 | nucleotidyltransferase_domain-containing_protein [Bacillus cereus] | CPTF_Ni         | 260158.6667 | 32877.28435 | 12.63739731 |
| UIJ66726.1 | nucleotidyltransferase_domain-containing_protein [Bacillus cereus] | CPTF_U          | 229281.3333 | 40653.76837 | 17.73095427 |
| UIJ66726.1 | nucleotidyltransferase_domain-containing_protein [Bacillus cereus] | CPTF_metals_mix | 572319      | 81452.95248 | 14.23208953 |
| UIJ66726.1 | nucleotidyltransferase_domain-containing_protein [Bacillus cereus] | CPTF_zcontrol   | 232806.3333 | 65791.1224  | 28.26002259 |
| UIJ66729.1 | acyl-CoA_desaturase [Bacillus cereus]                              | CPTF_Al         | 46296.33333 | 80187.60154 | 173.2050808 |
| UIJ66729.1 | acyl-CoA_desaturase [Bacillus cereus]                              | CPTF_Cd         | 217190.3333 | 192254.8698 | 88.51907306 |
| UIJ66729.1 | acyl-CoA_desaturase [Bacillus cereus]                              | CPTF_Co         | 90353       | 156495.9866 | 173.2050808 |
| UIJ66729.1 | acyl-CoA_desaturase [Bacillus cereus]                              | CPTF_Cu         | 0           | 0           | 0           |
| UIJ66729.1 | acyl-CoA_desaturase [Bacillus cereus]                              | CPTF_Fe         | 89165.66667 | 154439.465  | 173.2050808 |
| UIJ66729.1 | acyl-CoA_desaturase [Bacillus cereus]                              | CPTF_Mn         | 182193.3333 | 204693.5427 | 112.3496338 |
| UIJ66729.1 | acyl-CoA_desaturase [Bacillus cereus]                              | CPTF_Ni         | 0           | 0           | 0           |
| UIJ66729.1 | acyl-CoA_desaturase [Bacillus cereus]                              | CPTF_U          | 0           | 0           | 0           |
| UIJ66729.1 | acyl-CoA_desaturase [Bacillus cereus]                              | CPTF_metals_mix | 980613.3667 | 132620.0898 | 13.52419764 |
| UIJ66729.1 | acyl-CoA_desaturase [Bacillus cereus]                              | CPTF_zcontrol   | 133629      | 143342.4915 | 107.2689996 |
| UIJ66731.1 | ABC_transporter_substrate-binding_protein [Bacillus cereus]        | CPTF_Al         | 177052.3333 | 306663.6369 | 173.2050808 |
| UIJ66731.1 | ABC_transporter_substrate-binding_protein [Bacillus cereus]        | CPTF_Cd         | 103791.4333 | 52396.00869 | 50.48201669 |
| UIJ66731.1 | ABC_transporter_substrate-binding_protein [Bacillus cereus]        | CPTF_Co         | 469770.6333 | 361963.1421 | 77.05103649 |
| UIJ66731.1 | ABC_transporter_substrate-binding_protein [Bacillus cereus]        | CPTF_Cu         | 109854.6    | 140505.4389 | 127.9012794 |
| UIJ66731.1 | ABC_transporter_substrate-binding_protein [Bacillus cereus]        | CPTF_Fe         | 31233.16667 | 54097.43155 | 173.2050808 |
| UIJ66731.1 | ABC_transporter_substrate-binding_protein [Bacillus cereus]        | CPTF_Mn         | 10849.7     | 18792.23165 | 173.2050808 |
| UIJ66731.1 | ABC_transporter_substrate-binding_protein [Bacillus cereus]        | CPTF_Ni         | 364544      | 315720.6125 | 86.60699737 |
| UIJ66731.1 | ABC_transporter_substrate-binding_protein [Bacillus cereus]        | CPTF_U          | 245717      | 425594.3283 | 173.2050808 |
| UIJ66731.1 | ABC_transporter_substrate-binding_protein [Bacillus cereus]        | CPTF_metals_mix | 15678.5     | 27155.95859 | 173.2050808 |
| UIJ66731.1 | ABC_transporter_substrate-binding_protein [Bacillus cereus]        | CPTF_zcontrol   | 0           | 0           | 0           |
| UIJ66735.1 | arginine_deiminase [Bacillus cereus]                               | CPTF_Al         | 14236388.17 | 871812.3357 | 6.123830887 |
| UIJ66735.1 | arginine_deiminase [Bacillus cereus]                               | CPTF_Cd         | 15543669.2  | 2307853.311 | 14.84754521 |
| UIJ66735.1 | arginine_deiminase [Bacillus cereus]                               | CPTF_Co         | 15556570.33 | 1402520.271 | 9.015613602 |
| UIJ66735.1 | arginine_deiminase [Bacillus cereus]                               | CPTF_Cu         | 17342452.1  | 1913192.395 | 11.03184477 |
| UIJ66735.1 | arginine_deiminase [Bacillus cereus]                               | CPTF_Fe         | 14445874.17 | 1889543.036 | 13.0801571  |
| UIJ66735.1 | arginine_deiminase [Bacillus cereus]                               | CPTF_Mn         | 13299391.87 | 946482.7966 | 7.116737412 |
| UIJ66735.1 | arginine_deiminase [Bacillus cereus]                               | CPTF_Ni         | 15424293.73 | 1302952.246 | 8.447402965 |
| UIJ66735.1 | arginine_deiminase [Bacillus cereus]                               | CPTF_U          | 16080089.1  | 1862686.551 | 11.5838074  |
| UIJ66735.1 | arginine_deiminase [Bacillus cereus]                               | CPTF_metals_mix | 24769166.4  | 1359238.252 | 5.487622109 |
| UIJ66735.1 | arginine_deiminase [Bacillus cereus]                               | CPTF_zcontrol   | 14627208.09 | 2323531.711 | 15.88499799 |
| UIJ66736.1 | ornithine_carbamoyltransferase [Bacillus cereus]                   | CPTF_Al         | 71416       | 123696.1405 | 173.2050808 |
| UIJ66736.1 | ornithine_carbamoyltransferase [Bacillus cereus]                   | CPTF_Cd         | 124960.8333 | 147385.7541 | 117.9455595 |
| UIJ66736.1 | ornithine_carbamoyltransferase [Bacillus cereus]                   | CPTF_Co         | 155552.5333 | 112915.8573 | 72.59017575 |
| UIJ66736.1 | ornithine_carbamoyltransferase [Bacillus cereus]                   | CPTF_Cu         | 194975.3333 | 53417.04797 | 27.39682352 |
| UIJ66736.1 | ornithine_carbamoyltransferase [Bacillus cereus]                   | CPTF_Fe         | 51519       | 89233.52556 | 173.2050808 |
| UIJ66736.1 | ornithine_carbamoyltransferase [Bacillus cereus]                   | CPTF_Mn         | 43661.33333 | 75623.64766 | 173.2050808 |
| UIJ66736.1 | ornithine_carbamoyltransferase [Bacillus cereus]                   | CPTF_Ni         | 68475.66667 | 118603.3337 | 173.2050808 |
| UIJ66736.1 | ornithine_carbamoyltransferase [Bacillus cereus]                   | CPTF_U          | 23798.6     | 41220.38435 | 173.2050808 |
| UIJ66736.1 | ornithine_carbamoyltransferase [Bacillus cereus]                   | CPTF_metals_mix | 450510.6333 | 68609.24715 | 15.22921815 |
| UIJ66736.1 | ornithine_carbamoyltransferase [Bacillus cereus]                   | CPTF_zcontrol   | 80505.63333 | 76909.94361 | 95.53361725 |
| UIJ66738.1 | carbamate_kinase [Bacillus cereus]                                 | CPTF_Al         | 0           | 0           | 0           |
| UIJ66738.1 | carbamate_kinase [Bacillus cereus]                                 | CPTF_Cd         | 0           | 0           | 0           |
| UIJ66738.1 | carbamate_kinase [Bacillus cereus]                                 | CPTF_Co         | 0           | 0           | 0           |

|            |                                                                    |                 |             |             |             |
|------------|--------------------------------------------------------------------|-----------------|-------------|-------------|-------------|
| UIJ66738.1 | carbamate_kinase [Bacillus_cereus]                                 | CPTF_Cu         | 0           | 0           | 0           |
| UIJ66738.1 | carbamate_kinase [Bacillus_cereus]                                 | CPTF_Fe         | 0           | 0           | 0           |
| UIJ66738.1 | carbamate_kinase [Bacillus_cereus]                                 | CPTF_Mn         | 0           | 0           | 0           |
| UIJ66738.1 | carbamate_kinase [Bacillus_cereus]                                 | CPTF_Ni         | 0           | 0           | 0           |
| UIJ66738.1 | carbamate_kinase [Bacillus_cereus]                                 | CPTF_U          | 0           | 0           | 0           |
| UIJ66738.1 | carbamate_kinase [Bacillus_cereus]                                 | CPTF_metals_mix | 13092.83333 | 22677.45255 | 173.2050808 |
| UIJ66738.1 | carbamate_kinase [Bacillus_cereus]                                 | CPTF_zcontrol   | 0           | 0           | 0           |
| UIJ66742.1 | alpha-glucosidase [Bacillus_cereus]                                | CPTF_Al         | 227931.3667 | 173655.7138 | 76.18772103 |
| UIJ66742.1 | alpha-glucosidase [Bacillus_cereus]                                | CPTF_Cd         | 200918.7    | 174005.3078 | 86.60483461 |
| UIJ66742.1 | alpha-glucosidase [Bacillus_cereus]                                | CPTF_Co         | 161794.6    | 124077.3889 | 76.68821387 |
| UIJ66742.1 | alpha-glucosidase [Bacillus_cereus]                                | CPTF_Cu         | 305378.7    | 18285.60356 | 5.987845113 |
| UIJ66742.1 | alpha-glucosidase [Bacillus_cereus]                                | CPTF_Fe         | 127527.8667 | 126076.4628 | 98.8618928  |
| UIJ66742.1 | alpha-glucosidase [Bacillus_cereus]                                | CPTF_Mn         | 49775.56667 | 70780.32461 | 142.1989328 |
| UIJ66742.1 | alpha-glucosidase [Bacillus_cereus]                                | CPTF_Ni         | 296165.8333 | 7820.472866 | 2.640572269 |
| UIJ66742.1 | alpha-glucosidase [Bacillus_cereus]                                | CPTF_U          | 189152.8333 | 125598.0587 | 66.40030523 |
| UIJ66742.1 | alpha-glucosidase [Bacillus_cereus]                                | CPTF_metals_mix | 16583.63333 | 17318.24229 | 104.4297226 |
| UIJ66742.1 | alpha-glucosidase [Bacillus_cereus]                                | CPTF_zcontrol   | 180900.3333 | 159352.8569 | 88.08875803 |
| UIJ66745.1 | YhgE/Pip_domain-containing_protein [Bacillus_cereus]               | CPTF_Al         | 0           | 0           | 0           |
| UIJ66745.1 | YhgE/Pip_domain-containing_protein [Bacillus_cereus]               | CPTF_Cd         | 0           | 0           | 0           |
| UIJ66745.1 | YhgE/Pip_domain-containing_protein [Bacillus_cereus]               | CPTF_Co         | 0           | 0           | 0           |
| UIJ66745.1 | YhgE/Pip_domain-containing_protein [Bacillus_cereus]               | CPTF_Cu         | 6194.166667 | 10728.61138 | 173.2050808 |
| UIJ66745.1 | YhgE/Pip_domain-containing_protein [Bacillus_cereus]               | CPTF_Fe         | 0           | 0           | 0           |
| UIJ66745.1 | YhgE/Pip_domain-containing_protein [Bacillus_cereus]               | CPTF_Mn         | 0           | 0           | 0           |
| UIJ66745.1 | YhgE/Pip_domain-containing_protein [Bacillus_cereus]               | CPTF_Ni         | 0           | 0           | 0           |
| UIJ66745.1 | YhgE/Pip_domain-containing_protein [Bacillus_cereus]               | CPTF_U          | 0           | 0           | 0           |
| UIJ66745.1 | YhgE/Pip_domain-containing_protein [Bacillus_cereus]               | CPTF_metals_mix | 0           | 0           | 0           |
| UIJ66745.1 | YhgE/Pip_domain-containing_protein [Bacillus_cereus]               | CPTF_zcontrol   | 0           | 0           | 0           |
| UIJ66746.1 | DNA_topoisomerase_III [Bacillus_cereus]                            | CPTF_Al         | 535701.7333 | 73977.67915 | 13.80949035 |
| UIJ66746.1 | DNA_topoisomerase_III [Bacillus_cereus]                            | CPTF_Cd         | 474813.1333 | 108824.7488 | 22.91949005 |
| UIJ66746.1 | DNA_topoisomerase_III [Bacillus_cereus]                            | CPTF_Co         | 447841      | 27516.65988 | 6.144292256 |
| UIJ66746.1 | DNA_topoisomerase_III [Bacillus_cereus]                            | CPTF_Cu         | 595967.4    | 89418.10339 | 15.00385816 |
| UIJ66746.1 | DNA_topoisomerase_III [Bacillus_cereus]                            | CPTF_Fe         | 589019.3    | 95734.07568 | 16.25313053 |
| UIJ66746.1 | DNA_topoisomerase_III [Bacillus_cereus]                            | CPTF_Mn         | 302307.3333 | 145923.8897 | 48.27004629 |
| UIJ66746.1 | DNA_topoisomerase_III [Bacillus_cereus]                            | CPTF_Ni         | 524230.3333 | 31080.68269 | 5.928821877 |
| UIJ66746.1 | DNA_topoisomerase_III [Bacillus_cereus]                            | CPTF_U          | 341914.3333 | 131192.5652 | 38.37001039 |
| UIJ66746.1 | DNA_topoisomerase_III [Bacillus_cereus]                            | CPTF_metals_mix | 533570.0333 | 26928.2619  | 5.046809269 |
| UIJ66746.1 | DNA_topoisomerase_III [Bacillus_cereus]                            | CPTF_zcontrol   | 443271.2333 | 152194.8471 | 34.33447416 |
| UIJ66811.1 | ectonucleotide_pyrophosphatase/phosphodiesterase [Bacillus_cereus] | CPTF_Al         | 1038421     | 162374.2582 | 15.63665009 |
| UIJ66811.1 | ectonucleotide_pyrophosphatase/phosphodiesterase [Bacillus_cereus] | CPTF_Cd         | 650440.6667 | 581496.8122 | 89.40043911 |
| UIJ66811.1 | ectonucleotide_pyrophosphatase/phosphodiesterase [Bacillus_cereus] | CPTF_Co         | 303638.3    | 499826.1542 | 164.6123543 |
| UIJ66811.1 | ectonucleotide_pyrophosphatase/phosphodiesterase [Bacillus_cereus] | CPTF_Cu         | 629276      | 590005.1631 | 93.75936205 |
| UIJ66811.1 | ectonucleotide_pyrophosphatase/phosphodiesterase [Bacillus_cereus] | CPTF_Fe         | 423687.6333 | 656566.3789 | 154.9647257 |
| UIJ66811.1 | ectonucleotide_pyrophosphatase/phosphodiesterase [Bacillus_cereus] | CPTF_Mn         | 343333.3333 | 594670.7773 | 173.2050808 |
| UIJ66811.1 | ectonucleotide_pyrophosphatase/phosphodiesterase [Bacillus_cereus] | CPTF_Ni         | 876666.6667 | 794753.6306 | 90.65630767 |
| UIJ66811.1 | ectonucleotide_pyrophosphatase/phosphodiesterase [Bacillus_cereus] | CPTF_U          | 716666.6667 | 1241303.079 | 173.2050808 |
| UIJ66811.1 | ectonucleotide_pyrophosphatase/phosphodiesterase [Bacillus_cereus] | CPTF_metals_mix | 0           | 0           | 0           |
| UIJ66811.1 | ectonucleotide_pyrophosphatase/phosphodiesterase [Bacillus_cereus] | CPTF_zcontrol   | 0           | 0           | 0           |
| UIJ66817.1 | TerD_family_protein [Bacillus_cereus]                              | CPTF_Al         | 4644556     | 1102021.763 | 23.72717141 |
| UIJ66817.1 | TerD_family_protein [Bacillus_cereus]                              | CPTF_Cd         | 4704187     | 769830.1692 | 16.36478672 |
| UIJ66817.1 | TerD_family_protein [Bacillus_cereus]                              | CPTF_Co         | 4873682.667 | 319113.6788 | 6.547690948 |
| UIJ66817.1 | TerD_family_protein [Bacillus_cereus]                              | CPTF_Cu         | 6734715.667 | 435758.7152 | 6.470335746 |
| UIJ66817.1 | TerD_family_protein [Bacillus_cereus]                              | CPTF_Fe         | 4429524.667 | 1073076.236 | 24.22553923 |
| UIJ66817.1 | TerD_family_protein [Bacillus_cereus]                              | CPTF_Mn         | 4735573     | 598981.6814 | 12.64855766 |
| UIJ66817.1 | TerD_family_protein [Bacillus_cereus]                              | CPTF_Ni         | 4171597     | 722257.2704 | 17.31368755 |
| UIJ66817.1 | TerD_family_protein [Bacillus_cereus]                              | CPTF_U          | 4007302     | 676151.6212 | 16.87298889 |
| UIJ66817.1 | TerD_family_protein [Bacillus_cereus]                              | CPTF_metals_mix | 11233026.07 | 578126.4094 | 5.146666677 |
| UIJ66817.1 | TerD_family_protein [Bacillus_cereus]                              | CPTF_zcontrol   | 4453202.333 | 406420.3352 | 9.126473598 |
| UIJ66818.1 | TerD_family_protein [Bacillus_cereus]                              | CPTF_Al         | 3912954.167 | 104400.3559 | 2.66806999  |
| UIJ66818.1 | TerD_family_protein [Bacillus_cereus]                              | CPTF_Cd         | 4329895.4   | 286884.6263 | 6.625671057 |
| UIJ66818.1 | TerD_family_protein [Bacillus_cereus]                              | CPTF_Co         | 4099252.5   | 122607.375  | 2.990969085 |
| UIJ66818.1 | TerD_family_protein [Bacillus_cereus]                              | CPTF_Cu         | 5456363.667 | 287957.8061 | 5.27746726  |

|            |                                                       |                 |             |             |             |
|------------|-------------------------------------------------------|-----------------|-------------|-------------|-------------|
| UIJ66818.1 | TerD_family_protein_[Bacillus_cereus]                 | CPTF_Fe         | 3778486.4   | 254291.1391 | 6.729973651 |
| UIJ66818.1 | TerD_family_protein_[Bacillus_cereus]                 | CPTF_Mn         | 4192354.4   | 610239.9958 | 14.55602121 |
| UIJ66818.1 | TerD_family_protein_[Bacillus_cereus]                 | CPTF_Ni         | 4054379.133 | 426419.0503 | 10.51749322 |
| UIJ66818.1 | TerD_family_protein_[Bacillus_cereus]                 | CPTF_U          | 3821622.8   | 342380.3046 | 8.959029254 |
| UIJ66818.1 | TerD_family_protein_[Bacillus_cereus]                 | CPTF_metals_mix | 14963174.17 | 1977669.182 | 13.21690946 |
| UIJ66818.1 | TerD_family_protein_[Bacillus_cereus]                 | CPTF_zcontrol   | 3770628.233 | 157417.1425 | 4.174825327 |
| UIJ66819.1 | TerD_family_protein_[Bacillus_cereus]                 | CPTF_Al         | 2600898.433 | 473827.3694 | 18.2178344  |
| UIJ66819.1 | TerD_family_protein_[Bacillus_cereus]                 | CPTF_Cd         | 3073422.5   | 142938.475  | 4.650791586 |
| UIJ66819.1 | TerD_family_protein_[Bacillus_cereus]                 | CPTF_Co         | 2200406     | 255104.4423 | 11.59351694 |
| UIJ66819.1 | TerD_family_protein_[Bacillus_cereus]                 | CPTF_Cu         | 3160886.633 | 83037.19127 | 2.627022127 |
| UIJ66819.1 | TerD_family_protein_[Bacillus_cereus]                 | CPTF_Fe         | 2701104.733 | 336783.7525 | 12.46837075 |
| UIJ66819.1 | TerD_family_protein_[Bacillus_cereus]                 | CPTF_Mn         | 2279422.9   | 524792.6897 | 23.02305069 |
| UIJ66819.1 | TerD_family_protein_[Bacillus_cereus]                 | CPTF_Ni         | 1814175.667 | 184196.9255 | 10.1532023  |
| UIJ66819.1 | TerD_family_protein_[Bacillus_cereus]                 | CPTF_U          | 1841554.3   | 70342.5813  | 3.819739733 |
| UIJ66819.1 | TerD_family_protein_[Bacillus_cereus]                 | CPTF_metals_mix | 6078481.367 | 382844.0949 | 6.298351048 |
| UIJ66819.1 | TerD_family_protein_[Bacillus_cereus]                 | CPTF_zcontrol   | 2105127.967 | 169571.1242 | 8.055145666 |
| UIJ66821.1 | YceG_family_protein_[Bacillus_cereus]                 | CPTF_Al         | 89439.66667 | 77644.22974 | 86.81185053 |
| UIJ66821.1 | YceG_family_protein_[Bacillus_cereus]                 | CPTF_Cd         | 0           | 0           | 0           |
| UIJ66821.1 | YceG_family_protein_[Bacillus_cereus]                 | CPTF_Co         | 46360.5     | 57997.12498 | 125.1003009 |
| UIJ66821.1 | YceG_family_protein_[Bacillus_cereus]                 | CPTF_Cu         | 34158.66667 | 59164.54619 | 173.2050808 |
| UIJ66821.1 | YceG_family_protein_[Bacillus_cereus]                 | CPTF_Fe         | 23597.96667 | 40872.87722 | 173.2050808 |
| UIJ66821.1 | YceG_family_protein_[Bacillus_cereus]                 | CPTF_Mn         | 23108.43333 | 40024.98062 | 173.2050808 |
| UIJ66821.1 | YceG_family_protein_[Bacillus_cereus]                 | CPTF_Ni         | 46885.66667 | 81208.35681 | 173.2050808 |
| UIJ66821.1 | YceG_family_protein_[Bacillus_cereus]                 | CPTF_U          | 44473.33333 | 77030.07292 | 173.2050808 |
| UIJ66821.1 | YceG_family_protein_[Bacillus_cereus]                 | CPTF_metals_mix | 69156.5     | 50200.22426 | 72.58930723 |
| UIJ66821.1 | YceG_family_protein_[Bacillus_cereus]                 | CPTF_zcontrol   | 71416.66667 | 61852.36368 | 86.60774377 |
| UIJ66822.1 | toxic_anion_resistance_protein_[Bacillus_cereus]      | CPTF_Al         | 336533.2333 | 86301.36946 | 25.64423389 |
| UIJ66822.1 | toxic_anion_resistance_protein_[Bacillus_cereus]      | CPTF_Cd         | 225032.7333 | 131487.2506 | 58.43027752 |
| UIJ66822.1 | toxic_anion_resistance_protein_[Bacillus_cereus]      | CPTF_Co         | 380044.2333 | 152584.5066 | 40.14914403 |
| UIJ66822.1 | toxic_anion_resistance_protein_[Bacillus_cereus]      | CPTF_Cu         | 581994.3667 | 465350.5369 | 79.95791085 |
| UIJ66822.1 | toxic_anion_resistance_protein_[Bacillus_cereus]      | CPTF_Fe         | 312522.8    | 174375.906  | 55.79621904 |
| UIJ66822.1 | toxic_anion_resistance_protein_[Bacillus_cereus]      | CPTF_Mn         | 619481.7    | 304231.7143 | 49.11068628 |
| UIJ66822.1 | toxic_anion_resistance_protein_[Bacillus_cereus]      | CPTF_Ni         | 475085.8333 | 193907.2599 | 40.81520564 |
| UIJ66822.1 | toxic_anion_resistance_protein_[Bacillus_cereus]      | CPTF_U          | 359608.3333 | 368153.0066 | 102.3761055 |
| UIJ66822.1 | toxic_anion_resistance_protein_[Bacillus_cereus]      | CPTF_metals_mix | 1054344.8   | 205148.6632 | 19.45745482 |
| UIJ66822.1 | toxic_anion_resistance_protein_[Bacillus_cereus]      | CPTF_zcontrol   | 301558.3333 | 268370.9953 | 88.99472031 |
| UIJ66823.1 | cation-translocating_P-type_ATPase_[Bacillus_cereus]  | CPTF_Al         | 69116.1     | 61178.59483 | 88.51569291 |
| UIJ66823.1 | cation-translocating_P-type_ATPase_[Bacillus_cereus]  | CPTF_Cd         | 131151.0667 | 179069.5931 | 136.5368942 |
| UIJ66823.1 | cation-translocating_P-type_ATPase_[Bacillus_cereus]  | CPTF_Co         | 88260.1     | 14191.97591 | 16.07971882 |
| UIJ66823.1 | cation-translocating_P-type_ATPase_[Bacillus_cereus]  | CPTF_Cu         | 44151.56667 | 38418.43903 | 87.01489421 |
| UIJ66823.1 | cation-translocating_P-type_ATPase_[Bacillus_cereus]  | CPTF_Fe         | 76320       | 132190.1176 | 173.2050808 |
| UIJ66823.1 | cation-translocating_P-type_ATPase_[Bacillus_cereus]  | CPTF_Mn         | 152974.2333 | 137535.2454 | 89.90745852 |
| UIJ66823.1 | cation-translocating_P-type_ATPase_[Bacillus_cereus]  | CPTF_Ni         | 116461.3    | 23887.01369 | 20.51068783 |
| UIJ66823.1 | cation-translocating_P-type_ATPase_[Bacillus_cereus]  | CPTF_U          | 0           | 0           | 0           |
| UIJ66823.1 | cation-translocating_P-type_ATPase_[Bacillus_cereus]  | CPTF_metals_mix | 90835.06667 | 61858.86007 | 68.1001978  |
| UIJ66823.1 | cation-translocating_P-type_ATPase_[Bacillus_cereus]  | CPTF_zcontrol   | 50337       | 87186.2415  | 173.2050808 |
| UIJ66826.1 | DUF4075_domain-containing_protein_[Bacillus_cereus]   | CPTF_Al         | 1639728.333 | 370522.3406 | 22.59656878 |
| UIJ66826.1 | DUF4075_domain-containing_protein_[Bacillus_cereus]   | CPTF_Cd         | 2251307     | 52478.46394 | 2.33102211  |
| UIJ66826.1 | DUF4075_domain-containing_protein_[Bacillus_cereus]   | CPTF_Co         | 1609081.333 | 69093.4003  | 4.293965685 |
| UIJ66826.1 | DUF4075_domain-containing_protein_[Bacillus_cereus]   | CPTF_Cu         | 1235777.333 | 145483.6693 | 11.77264426 |
| UIJ66826.1 | DUF4075_domain-containing_protein_[Bacillus_cereus]   | CPTF_Fe         | 1919451.333 | 194704.896  | 10.14377872 |
| UIJ66826.1 | DUF4075_domain-containing_protein_[Bacillus_cereus]   | CPTF_Mn         | 1801153.5   | 418001.0319 | 23.20740747 |
| UIJ66826.1 | DUF4075_domain-containing_protein_[Bacillus_cereus]   | CPTF_Ni         | 1443333.333 | 90737.71726 | 6.28667787  |
| UIJ66826.1 | DUF4075_domain-containing_protein_[Bacillus_cereus]   | CPTF_U          | 1431785     | 179819.1382 | 12.55908801 |
| UIJ66826.1 | DUF4075_domain-containing_protein_[Bacillus_cereus]   | CPTF_metals_mix | 1941502.133 | 659549.0156 | 33.97106829 |
| UIJ66826.1 | DUF4075_domain-containing_protein_[Bacillus_cereus]   | CPTF_zcontrol   | 1415809.333 | 152469.5429 | 10.76907316 |
| UIJ66828.1 | cadmium-translocating_P-type_ATPase_[Bacillus_cereus] | CPTF_Al         | 0           | 0           | 0           |
| UIJ66828.1 | cadmium-translocating_P-type_ATPase_[Bacillus_cereus] | CPTF_Cd         | 0           | 0           | 0           |
| UIJ66828.1 | cadmium-translocating_P-type_ATPase_[Bacillus_cereus] | CPTF_Co         | 22577.03333 | 21036.66432 | 93.1772745  |
| UIJ66828.1 | cadmium-translocating_P-type_ATPase_[Bacillus_cereus] | CPTF_Cu         | 116775.6667 | 202261.3878 | 173.2050808 |
| UIJ66828.1 | cadmium-translocating_P-type_ATPase_[Bacillus_cereus] | CPTF_Fe         | 5873.3      | 10172.85401 | 173.2050808 |

|            |                                                                       |                 |             |             |             |
|------------|-----------------------------------------------------------------------|-----------------|-------------|-------------|-------------|
| UIJ66828.1 | cadmium-translocating_P-type_ATPase_[Bacillus_cereus]                 | CPTF_Mn         | 0           | 0           | 0           |
| UIJ66828.1 | cadmium-translocating_P-type_ATPase_[Bacillus_cereus]                 | CPTF_Ni         | 0           | 0           | 0           |
| UIJ66828.1 | cadmium-translocating_P-type_ATPase_[Bacillus_cereus]                 | CPTF_U          | 0           | 0           | 0           |
| UIJ66828.1 | cadmium-translocating_P-type_ATPase_[Bacillus_cereus]                 | CPTF_metals_mix | 89243.03333 | 77315.70739 | 86.63500612 |
| UIJ66828.1 | cadmium-translocating_P-type_ATPase_[Bacillus_cereus]                 | CPTF_zcontrol   | 0           | 0           | 0           |
| UIJ66832.1 | GTP-binding_protein_[Bacillus_cereus]                                 | CPTF_Al         | 545712.2333 | 89276.19592 | 16.35957387 |
| UIJ66832.1 | GTP-binding_protein_[Bacillus_cereus]                                 | CPTF_Cd         | 516910.9    | 56037.40771 | 10.84082532 |
| UIJ66832.1 | GTP-binding_protein_[Bacillus_cereus]                                 | CPTF_Co         | 520398.4    | 151501.706  | 29.11263871 |
| UIJ66832.1 | GTP-binding_protein_[Bacillus_cereus]                                 | CPTF_Cu         | 532534.6333 | 65303.22888 | 12.2627196  |
| UIJ66832.1 | GTP-binding_protein_[Bacillus_cereus]                                 | CPTF_Fe         | 495534      | 17603.3122  | 3.552392408 |
| UIJ66832.1 | GTP-binding_protein_[Bacillus_cereus]                                 | CPTF_Mn         | 525342.7    | 127411.615  | 24.25304757 |
| UIJ66832.1 | GTP-binding_protein_[Bacillus_cereus]                                 | CPTF_Ni         | 542646.3667 | 172157.2998 | 31.72550493 |
| UIJ66832.1 | GTP-binding_protein_[Bacillus_cereus]                                 | CPTF_U          | 535796.0333 | 65522.25663 | 12.22895515 |
| UIJ66832.1 | GTP-binding_protein_[Bacillus_cereus]                                 | CPTF_metals_mix | 810353.2333 | 202950.1165 | 25.0446482  |
| UIJ66832.1 | GTP-binding_protein_[Bacillus_cereus]                                 | CPTF_zcontrol   | 332241.2    | 16090.11913 | 4.842903025 |
| UIJ66839.1 | hypothetical_protein_LW858_00340_[Bacillus_cereus]                    | CPTF_Al         | 66987.66667 | 58013.44775 | 86.60317733 |
| UIJ66839.1 | hypothetical_protein_LW858_00340_[Bacillus_cereus]                    | CPTF_Cd         | 123672.4667 | 58727.06032 | 47.48596184 |
| UIJ66839.1 | hypothetical_protein_LW858_00340_[Bacillus_cereus]                    | CPTF_Co         | 90082.83333 | 39552.20393 | 43.90648303 |
| UIJ66839.1 | hypothetical_protein_LW858_00340_[Bacillus_cereus]                    | CPTF_Cu         | 143096.8    | 65198.14985 | 45.56226963 |
| UIJ66839.1 | hypothetical_protein_LW858_00340_[Bacillus_cereus]                    | CPTF_Fe         | 101710.4333 | 50432.30996 | 49.58420518 |
| UIJ66839.1 | hypothetical_protein_LW858_00340_[Bacillus_cereus]                    | CPTF_Mn         | 147999.3333 | 40110.81178 | 27.10202193 |
| UIJ66839.1 | hypothetical_protein_LW858_00340_[Bacillus_cereus]                    | CPTF_Ni         | 62390.36667 | 2716.643903 | 4.354268211 |
| UIJ66839.1 | hypothetical_protein_LW858_00340_[Bacillus_cereus]                    | CPTF_U          | 78131.33333 | 67708.67762 | 86.66008211 |
| UIJ66839.1 | hypothetical_protein_LW858_00340_[Bacillus_cereus]                    | CPTF_metals_mix | 366584.5667 | 65258.27553 | 17.80169747 |
| UIJ66839.1 | hypothetical_protein_LW858_00340_[Bacillus_cereus]                    | CPTF_zcontrol   | 42253.2     | 37104.04743 | 87.81357963 |
| UIJ66840.1 | class_I_fumarate_hydratase_[Bacillus_cereus]                          | CPTF_Al         | 1668514.767 | 333964.9282 | 20.01570108 |
| UIJ66840.1 | class_I_fumarate_hydratase_[Bacillus_cereus]                          | CPTF_Cd         | 1680903.067 | 47571.46654 | 2.830113615 |
| UIJ66840.1 | class_I_fumarate_hydratase_[Bacillus_cereus]                          | CPTF_Co         | 1539262.4   | 708110.1669 | 46.00321342 |
| UIJ66840.1 | class_I_fumarate_hydratase_[Bacillus_cereus]                          | CPTF_Cu         | 1043152.967 | 162583.0942 | 15.58573856 |
| UIJ66840.1 | class_I_fumarate_hydratase_[Bacillus_cereus]                          | CPTF_Fe         | 1694934.567 | 283891.4661 | 16.74940565 |
| UIJ66840.1 | class_I_fumarate_hydratase_[Bacillus_cereus]                          | CPTF_Mn         | 1786409.9   | 429374.8956 | 24.03563122 |
| UIJ66840.1 | class_I_fumarate_hydratase_[Bacillus_cereus]                          | CPTF_Ni         | 1527509.733 | 242596.9818 | 15.8818616  |
| UIJ66840.1 | class_I_fumarate_hydratase_[Bacillus_cereus]                          | CPTF_U          | 1156590.6   | 189687.7995 | 16.40060013 |
| UIJ66840.1 | class_I_fumarate_hydratase_[Bacillus_cereus]                          | CPTF_metals_mix | 962333.3333 | 173353.5916 | 18.01388205 |
| UIJ66840.1 | class_I_fumarate_hydratase_[Bacillus_cereus]                          | CPTF_zcontrol   | 1606733     | 362382.1375 | 22.55397365 |
| UIJ66843.1 | 23S_rRNA_(uracil(1939)-C(5))-methyltransferase_RlmD_[Bacillus_cereus] | CPTF_Al         | 173523.3333 | 47221.08421 | 27.21310345 |
| UIJ66843.1 | 23S_rRNA_(uracil(1939)-C(5))-methyltransferase_RlmD_[Bacillus_cereus] | CPTF_Cd         | 95943.76667 | 99383.23609 | 103.5848805 |
| UIJ66843.1 | 23S_rRNA_(uracil(1939)-C(5))-methyltransferase_RlmD_[Bacillus_cereus] | CPTF_Co         | 218713.6667 | 61187.11827 | 27.97590073 |
| UIJ66843.1 | 23S_rRNA_(uracil(1939)-C(5))-methyltransferase_RlmD_[Bacillus_cereus] | CPTF_Cu         | 141434.6667 | 16643.44941 | 11.76758839 |
| UIJ66843.1 | 23S_rRNA_(uracil(1939)-C(5))-methyltransferase_RlmD_[Bacillus_cereus] | CPTF_Fe         | 206846.3333 | 114688.8954 | 55.44642419 |
| UIJ66843.1 | 23S_rRNA_(uracil(1939)-C(5))-methyltransferase_RlmD_[Bacillus_cereus] | CPTF_Mn         | 186041.6    | 72328.88524 | 38.87780219 |
| UIJ66843.1 | 23S_rRNA_(uracil(1939)-C(5))-methyltransferase_RlmD_[Bacillus_cereus] | CPTF_Ni         | 125767.8667 | 112243.4699 | 89.24654035 |
| UIJ66843.1 | 23S_rRNA_(uracil(1939)-C(5))-methyltransferase_RlmD_[Bacillus_cereus] | CPTF_U          | 141339      | 32974.01779 | 23.32973757 |
| UIJ66843.1 | 23S_rRNA_(uracil(1939)-C(5))-methyltransferase_RlmD_[Bacillus_cereus] | CPTF_metals_mix | 31782.46667 | 55048.84706 | 173.2050808 |
| UIJ66843.1 | 23S_rRNA_(uracil(1939)-C(5))-methyltransferase_RlmD_[Bacillus_cereus] | CPTF_zcontrol   | 227498.7    | 27694.0776  | 12.17329048 |
| UIJ66862.1 | formate_C-acetyltransferase_[Bacillus_cereus]                         | CPTF_Al         | 113440149.6 | 7625850.119 | 6.722355485 |
| UIJ66862.1 | formate_C-acetyltransferase_[Bacillus_cereus]                         | CPTF_Cd         | 106611551.4 | 12778657.97 | 11.98618518 |
| UIJ66862.1 | formate_C-acetyltransferase_[Bacillus_cereus]                         | CPTF_Co         | 104659521.7 | 1948157.041 | 1.861423603 |
| UIJ66862.1 | formate_C-acetyltransferase_[Bacillus_cereus]                         | CPTF_Cu         | 116170595   | 7701341.773 | 6.629338322 |
| UIJ66862.1 | formate_C-acetyltransferase_[Bacillus_cereus]                         | CPTF_Fe         | 104325119.1 | 10390670.62 | 9.959893365 |
| UIJ66862.1 | formate_C-acetyltransferase_[Bacillus_cereus]                         | CPTF_Mn         | 107436317.1 | 14301968.05 | 13.31204237 |
| UIJ66862.1 | formate_C-acetyltransferase_[Bacillus_cereus]                         | CPTF_Ni         | 97422180.3  | 8017569.245 | 8.229716498 |
| UIJ66862.1 | formate_C-acetyltransferase_[Bacillus_cereus]                         | CPTF_U          | 96714886.43 | 4959170.006 | 5.127618083 |
| UIJ66862.1 | formate_C-acetyltransferase_[Bacillus_cereus]                         | CPTF_metals_mix | 152629521.5 | 4551399.48  | 2.981991581 |
| UIJ66862.1 | formate_C-acetyltransferase_[Bacillus_cereus]                         | CPTF_zcontrol   | 96909369.03 | 4948085.782 | 5.10589     |
| UIJ66863.1 | pyruvate_formate_lyase-activating_protein_[Bacillus_cereus]           | CPTF_Al         | 5762473     | 469777.8672 | 8.152365612 |
| UIJ66863.1 | pyruvate_formate_lyase-activating_protein_[Bacillus_cereus]           | CPTF_Cd         | 4330391     | 1177104.14  | 27.18239854 |
| UIJ66863.1 | pyruvate_formate_lyase-activating_protein_[Bacillus_cereus]           | CPTF_Co         | 5336550.667 | 726177.329  | 13.60761612 |
| UIJ66863.1 | pyruvate_formate_lyase-activating_protein_[Bacillus_cereus]           | CPTF_Cu         | 5413249.667 | 1043192.348 | 19.27109245 |
| UIJ66863.1 | pyruvate_formate_lyase-activating_protein_[Bacillus_cereus]           | CPTF_Fe         | 5524215     | 596712.6225 | 10.80176319 |
| UIJ66863.1 | pyruvate_formate_lyase-activating_protein_[Bacillus_cereus]           | CPTF_Mn         | 5831491     | 442614.8206 | 7.590079803 |

|            |                                                                          |                 |             |             |             |
|------------|--------------------------------------------------------------------------|-----------------|-------------|-------------|-------------|
| UIJ66863.1 | pyruvate_formate_lyase-activating_protein [Bacillus cereus]              | CPTF_Ni         | 5039630.667 | 738806.389  | 14.65993121 |
| UIJ66863.1 | pyruvate_formate_lyase-activating_protein [Bacillus cereus]              | CPTF_U          | 5363985     | 684031.2059 | 12.75229528 |
| UIJ66863.1 | pyruvate_formate_lyase-activating_protein [Bacillus cereus]              | CPTF_metals_mix | 3304647.867 | 173911.6741 | 5.262638597 |
| UIJ66863.1 | pyruvate_formate_lyase-activating_protein [Bacillus cereus]              | CPTF_zcontrol   | 5611297     | 1009196.077 | 17.98507683 |
| UIJ66880.1 | DUF402_domain-containing_protein [Bacillus cereus]                       | CPTF_Al         | 180308.6667 | 13347.74233 | 7.402718115 |
| UIJ66880.1 | DUF402_domain-containing_protein [Bacillus cereus]                       | CPTF_Cd         | 192564.3333 | 18401.50008 | 9.556027207 |
| UIJ66880.1 | DUF402_domain-containing_protein [Bacillus cereus]                       | CPTF_Co         | 341639.7    | 157216.0907 | 46.01809765 |
| UIJ66880.1 | DUF402_domain-containing_protein [Bacillus cereus]                       | CPTF_Cu         | 431523.7    | 255151.9691 | 59.12814733 |
| UIJ66880.1 | DUF402_domain-containing_protein [Bacillus cereus]                       | CPTF_Fe         | 306315.3    | 147596.2642 | 48.18442442 |
| UIJ66880.1 | DUF402_domain-containing_protein [Bacillus cereus]                       | CPTF_Mn         | 202503.3333 | 116630.7716 | 57.59449471 |
| UIJ66880.1 | DUF402_domain-containing_protein [Bacillus cereus]                       | CPTF_Ni         | 262030.6667 | 141396.0863 | 53.96165576 |
| UIJ66880.1 | DUF402_domain-containing_protein [Bacillus cereus]                       | CPTF_U          | 238962.8333 | 57549.14777 | 24.08288643 |
| UIJ66880.1 | DUF402_domain-containing_protein [Bacillus cereus]                       | CPTF_metals_mix | 708430.8    | 81930.63035 | 11.56508587 |
| UIJ66880.1 | DUF402_domain-containing_protein [Bacillus cereus]                       | CPTF_zcontrol   | 394848.8    | 87910.76825 | 22.26441317 |
| UIJ66883.1 | glutamate_synthase [Bacillus cereus]                                     | CPTF_Al         | 7454929.3   | 321415.3703 | 4.311447599 |
| UIJ66883.1 | glutamate_synthase [Bacillus cereus]                                     | CPTF_Cd         | 7159049.4   | 421300.1814 | 5.884862052 |
| UIJ66883.1 | glutamate_synthase [Bacillus cereus]                                     | CPTF_Co         | 6721135.9   | 732878.0769 | 10.90408062 |
| UIJ66883.1 | glutamate_synthase [Bacillus cereus]                                     | CPTF_Cu         | 6732445.107 | 994494.9076 | 14.77167495 |
| UIJ66883.1 | glutamate_synthase [Bacillus cereus]                                     | CPTF_Fe         | 7569778.033 | 922988.2745 | 12.19306921 |
| UIJ66883.1 | glutamate_synthase [Bacillus cereus]                                     | CPTF_Mn         | 6688582.5   | 935574.8576 | 13.98764024 |
| UIJ66883.1 | glutamate_synthase [Bacillus cereus]                                     | CPTF_Ni         | 6973779.667 | 188168.0937 | 2.698222523 |
| UIJ66883.1 | glutamate_synthase [Bacillus cereus]                                     | CPTF_U          | 5450208.5   | 1764943.01  | 32.38303653 |
| UIJ66883.1 | glutamate_synthase [Bacillus cereus]                                     | CPTF_metals_mix | 2958781.6   | 473657.9736 | 16.00854803 |
| UIJ66883.1 | glutamate_synthase [Bacillus cereus]                                     | CPTF_zcontrol   | 6016374.967 | 952370.0687 | 15.82963286 |
| UIJ66884.1 | glutamate-1-semialdehyde-2,1-aminomutase [Bacillus cereus]               | CPTF_Al         | 2193829.7   | 152975.1262 | 6.972971795 |
| UIJ66884.1 | glutamate-1-semialdehyde-2,1-aminomutase [Bacillus cereus]               | CPTF_Cd         | 2678835.433 | 122204.3099 | 4.561844614 |
| UIJ66884.1 | glutamate-1-semialdehyde-2,1-aminomutase [Bacillus cereus]               | CPTF_Co         | 2289516.8   | 303889.6699 | 13.27309194 |
| UIJ66884.1 | glutamate-1-semialdehyde-2,1-aminomutase [Bacillus cereus]               | CPTF_Cu         | 2464419.833 | 193096.6428 | 7.835379354 |
| UIJ66884.1 | glutamate-1-semialdehyde-2,1-aminomutase [Bacillus cereus]               | CPTF_Fe         | 2397821.867 | 49847.31231 | 2.078858025 |
| UIJ66884.1 | glutamate-1-semialdehyde-2,1-aminomutase [Bacillus cereus]               | CPTF_Mn         | 2127361.833 | 73266.44527 | 3.444004876 |
| UIJ66884.1 | glutamate-1-semialdehyde-2,1-aminomutase [Bacillus cereus]               | CPTF_Ni         | 1840076.333 | 339362.555  | 18.44285201 |
| UIJ66884.1 | glutamate-1-semialdehyde-2,1-aminomutase [Bacillus cereus]               | CPTF_U          | 2205214.433 | 244662.896  | 11.094744   |
| UIJ66884.1 | glutamate-1-semialdehyde-2,1-aminomutase [Bacillus cereus]               | CPTF_metals_mix | 3939323.567 | 212071.1115 | 5.383439768 |
| UIJ66884.1 | glutamate-1-semialdehyde-2,1-aminomutase [Bacillus cereus]               | CPTF_zcontrol   | 1995505.333 | 150099.4362 | 7.521875973 |
| UIJ66889.1 | thioredoxin-dependent_thiol_peroxidase [Bacillus cereus]                 | CPTF_Al         | 237160.1333 | 93688.89826 | 39.50448878 |
| UIJ66889.1 | thioredoxin-dependent_thiol_peroxidase [Bacillus cereus]                 | CPTF_Cd         | 264805.1667 | 43027.03301 | 16.2485625  |
| UIJ66889.1 | thioredoxin-dependent_thiol_peroxidase [Bacillus cereus]                 | CPTF_Co         | 309784.3667 | 37959.58166 | 12.25354981 |
| UIJ66889.1 | thioredoxin-dependent_thiol_peroxidase [Bacillus cereus]                 | CPTF_Cu         | 267529.9333 | 70046.83815 | 26.18280403 |
| UIJ66889.1 | thioredoxin-dependent_thiol_peroxidase [Bacillus cereus]                 | CPTF_Fe         | 172905.9    | 45513.71496 | 26.32282355 |
| UIJ66889.1 | thioredoxin-dependent_thiol_peroxidase [Bacillus cereus]                 | CPTF_Mn         | 196446.7    | 124487.0065 | 63.36935489 |
| UIJ66889.1 | thioredoxin-dependent_thiol_peroxidase [Bacillus cereus]                 | CPTF_Ni         | 169354.8667 | 146674.7042 | 86.60790629 |
| UIJ66889.1 | thioredoxin-dependent_thiol_peroxidase [Bacillus cereus]                 | CPTF_U          | 37573       | 65078.34499 | 173.2050808 |
| UIJ66889.1 | thioredoxin-dependent_thiol_peroxidase [Bacillus cereus]                 | CPTF_metals_mix | 382127.1    | 4014.351667 | 1.050527866 |
| UIJ66889.1 | thioredoxin-dependent_thiol_peroxidase [Bacillus cereus]                 | CPTF_zcontrol   | 91232.66667 | 79209.28938 | 86.82119275 |
| UIJ66891.1 | DUF3884_family_protein [Bacillus cereus]                                 | CPTF_Al         | 189380      | 165788.4996 | 87.54277092 |
| UIJ66891.1 | DUF3884_family_protein [Bacillus cereus]                                 | CPTF_Cd         | 207268.6667 | 183606.0699 | 88.58361124 |
| UIJ66891.1 | DUF3884_family_protein [Bacillus cereus]                                 | CPTF_Co         | 185251.6667 | 170788.7205 | 92.19281186 |
| UIJ66891.1 | DUF3884_family_protein [Bacillus cereus]                                 | CPTF_Cu         | 393923      | 12060.56864 | 3.061656375 |
| UIJ66891.1 | DUF3884_family_protein [Bacillus cereus]                                 | CPTF_Fe         | 214829      | 212004.3365 | 98.68515726 |
| UIJ66891.1 | DUF3884_family_protein [Bacillus cereus]                                 | CPTF_Mn         | 131366.6667 | 228001.3948 | 173.2050808 |
| UIJ66891.1 | DUF3884_family_protein [Bacillus cereus]                                 | CPTF_Ni         | 920600.6667 | 137288.1362 | 14.9128869  |
| UIJ66891.1 | DUF3884_family_protein [Bacillus cereus]                                 | CPTF_U          | 558893.3333 | 28488.02103 | 5.09721969  |
| UIJ66891.1 | DUF3884_family_protein [Bacillus cereus]                                 | CPTF_metals_mix | 0           | 0           | 0           |
| UIJ66891.1 | DUF3884_family_protein [Bacillus cereus]                                 | CPTF_zcontrol   | 152539      | 264205.2981 | 173.2050808 |
| UIJ66892.1 | YebC/PmpR_family_DNA-binding_transcriptional_regulator [Bacillus cereus] | CPTF_Al         | 2297539.333 | 151068.2994 | 6.575221465 |
| UIJ66892.1 | YebC/PmpR_family_DNA-binding_transcriptional_regulator [Bacillus cereus] | CPTF_Cd         | 2302542     | 462546.4102 | 20.08851131 |
| UIJ66892.1 | YebC/PmpR_family_DNA-binding_transcriptional_regulator [Bacillus cereus] | CPTF_Co         | 2398251.333 | 79330.11923 | 3.307831758 |
| UIJ66892.1 | YebC/PmpR_family_DNA-binding_transcriptional_regulator [Bacillus cereus] | CPTF_Cu         | 2034976.333 | 258405.7402 | 12.69821845 |
| UIJ66892.1 | YebC/PmpR_family_DNA-binding_transcriptional_regulator [Bacillus cereus] | CPTF_Fe         | 1971160.333 | 217358.2445 | 11.02691855 |
| UIJ66892.1 | YebC/PmpR_family_DNA-binding_transcriptional_regulator [Bacillus cereus] | CPTF_Mn         | 2431017     | 286116.93   | 11.76943353 |
| UIJ66892.1 | YebC/PmpR_family_DNA-binding_transcriptional_regulator [Bacillus cereus] | CPTF_Ni         | 2048085.333 | 265133.0245 | 12.94540907 |



|            |                                                                                                                     |                 |             |             |             |
|------------|---------------------------------------------------------------------------------------------------------------------|-----------------|-------------|-------------|-------------|
| UIJ66892.1 | YebC/PmpR_family_DNA-binding_transcriptional_regulator_[Bacillus_cereus]                                            | CPTF_U          | 1672525.767 | 411983.0659 | 24.63238978 |
| UIJ66892.1 | YebC/PmpR_family_DNA-binding_transcriptional_regulator_[Bacillus_cereus]                                            | CPTF_metals_mix | 2300213.667 | 125317.9509 | 5.448100439 |
| UIJ66892.1 | YebC/PmpR_family_DNA-binding_transcriptional_regulator_[Bacillus_cereus]                                            | CPTF_zcontrol   | 2365865.667 | 104776.0569 | 4.428656214 |
| UIJ66895.1 | DsbA_family_protein_[Bacillus_cereus]                                                                               | CPTF_Al         | 399693.3333 | 109618.5617 | 27.42566677 |
| UIJ66895.1 | DsbA_family_protein_[Bacillus_cereus]                                                                               | CPTF_Cd         | 588706.6667 | 33298.40123 | 5.656195711 |
| UIJ66895.1 | DsbA_family_protein_[Bacillus_cereus]                                                                               | CPTF_Co         | 368514.6667 | 65923.61617 | 17.88900745 |
| UIJ66895.1 | DsbA_family_protein_[Bacillus_cereus]                                                                               | CPTF_Cu         | 282378.3333 | 104836.3874 | 37.12621509 |
| UIJ66895.1 | DsbA_family_protein_[Bacillus_cereus]                                                                               | CPTF_Fe         | 457736.6667 | 78138.31291 | 17.07058197 |
| UIJ66895.1 | DsbA_family_protein_[Bacillus_cereus]                                                                               | CPTF_Mn         | 190838.1667 | 109299.681  | 57.27349143 |
| UIJ66895.1 | DsbA_family_protein_[Bacillus_cereus]                                                                               | CPTF_Ni         | 0           | 0           | 0           |
| UIJ66895.1 | DsbA_family_protein_[Bacillus_cereus]                                                                               | CPTF_U          | 187200      | 163958.5168 | 87.58467777 |
| UIJ66895.1 | DsbA_family_protein_[Bacillus_cereus]                                                                               | CPTF_metals_mix | 545518.3333 | 27477.81815 | 5.037010944 |
| UIJ66895.1 | DsbA_family_protein_[Bacillus_cereus]                                                                               | CPTF_zcontrol   | 180638.3333 | 161098.2153 | 89.18274008 |
| UIJ66898.1 | tRNA_(uridine(34)/cytosine(34)/5-carboxymethylaminomethyluridine(34)-2'-O)-methyltransferase_TrmL_[Bacillus_cereus] | CPTF_Al         | 0           | 0           | 0           |
| UIJ66898.1 | tRNA_(uridine(34)/cytosine(34)/5-carboxymethylaminomethyluridine(34)-2'-O)-methyltransferase_TrmL_[Bacillus_cereus] | CPTF_Cd         | 0           | 0           | 0           |
| UIJ66898.1 | tRNA_(uridine(34)/cytosine(34)/5-carboxymethylaminomethyluridine(34)-2'-O)-methyltransferase_TrmL_[Bacillus_cereus] | CPTF_Co         | 0           | 0           | 0           |
| UIJ66898.1 | tRNA_(uridine(34)/cytosine(34)/5-carboxymethylaminomethyluridine(34)-2'-O)-methyltransferase_TrmL_[Bacillus_cereus] | CPTF_Cu         | 0           | 0           | 0           |
| UIJ66898.1 | tRNA_(uridine(34)/cytosine(34)/5-carboxymethylaminomethyluridine(34)-2'-O)-methyltransferase_TrmL_[Bacillus_cereus] | CPTF_Fe         | 0           | 0           | 0           |
| UIJ66898.1 | tRNA_(uridine(34)/cytosine(34)/5-carboxymethylaminomethyluridine(34)-2'-O)-methyltransferase_TrmL_[Bacillus_cereus] | CPTF_Mn         | 0           | 0           | 0           |
| UIJ66898.1 | tRNA_(uridine(34)/cytosine(34)/5-carboxymethylaminomethyluridine(34)-2'-O)-methyltransferase_TrmL_[Bacillus_cereus] | CPTF_Ni         | 0           | 0           | 0           |
| UIJ66898.1 | tRNA_(uridine(34)/cytosine(34)/5-carboxymethylaminomethyluridine(34)-2'-O)-methyltransferase_TrmL_[Bacillus_cereus] | CPTF_U          | 0           | 0           | 0           |
| UIJ66898.1 | tRNA_(uridine(34)/cytosine(34)/5-carboxymethylaminomethyluridine(34)-2'-O)-methyltransferase_TrmL_[Bacillus_cereus] | CPTF_metals_mix | 51554.66667 | 89295.30203 | 173.2050808 |
| UIJ66898.1 | tRNA_(uridine(34)/cytosine(34)/5-carboxymethylaminomethyluridine(34)-2'-O)-methyltransferase_TrmL_[Bacillus_cereus] | CPTF_zcontrol   | 0           | 0           | 0           |
| UIJ66906.1 | flotillin_family_protein_[Bacillus_cereus]                                                                          | CPTF_Al         | 1650657.433 | 34318.14528 | 2.079059203 |
| UIJ66906.1 | flotillin_family_protein_[Bacillus_cereus]                                                                          | CPTF_Cd         | 1811235.333 | 106378.0977 | 5.873234457 |
| UIJ66906.1 | flotillin_family_protein_[Bacillus_cereus]                                                                          | CPTF_Co         | 1465695.533 | 105293.0348 | 7.183827229 |
| UIJ66906.1 | flotillin_family_protein_[Bacillus_cereus]                                                                          | CPTF_Cu         | 1131236.867 | 692711.3661 | 61.23486482 |
| UIJ66906.1 | flotillin_family_protein_[Bacillus_cereus]                                                                          | CPTF_Fe         | 1569562.767 | 134406.8616 | 8.566331421 |
| UIJ66906.1 | flotillin_family_protein_[Bacillus_cereus]                                                                          | CPTF_Mn         | 1651467.333 | 446406.059  | 27.0308743  |
| UIJ66906.1 | flotillin_family_protein_[Bacillus_cereus]                                                                          | CPTF_Ni         | 915851.2333 | 268683.1027 | 29.33698104 |
| UIJ66906.1 | flotillin_family_protein_[Bacillus_cereus]                                                                          | CPTF_U          | 803506.9333 | 383309.3917 | 47.7045531  |
| UIJ66906.1 | flotillin_family_protein_[Bacillus_cereus]                                                                          | CPTF_metals_mix | 1170350.233 | 223607.0659 | 19.10599576 |
| UIJ66906.1 | flotillin_family_protein_[Bacillus_cereus]                                                                          | CPTF_zcontrol   | 923900.9    | 643650.3559 | 69.66660124 |
| UIJ66931.1 | GNAT_family_N-acetyltransferase_[Bacillus_cereus]                                                                   | CPTF_Al         | 4656.7      | 8065.640996 | 173.2050808 |
| UIJ66931.1 | GNAT_family_N-acetyltransferase_[Bacillus_cereus]                                                                   | CPTF_Cd         | 37408.26667 | 35408.44416 | 94.65406263 |
| UIJ66931.1 | GNAT_family_N-acetyltransferase_[Bacillus_cereus]                                                                   | CPTF_Co         | 52297.7     | 23689.5057  | 45.29741403 |
| UIJ66931.1 | GNAT_family_N-acetyltransferase_[Bacillus_cereus]                                                                   | CPTF_Cu         | 49643.8     | 24822.32254 | 50.00085115 |
| UIJ66931.1 | GNAT_family_N-acetyltransferase_[Bacillus_cereus]                                                                   | CPTF_Fe         | 22151.76667 | 19204.9544  | 86.69716818 |
| UIJ66931.1 | GNAT_family_N-acetyltransferase_[Bacillus_cereus]                                                                   | CPTF_Mn         | 30073.7     | 26235.21061 | 87.23639129 |
| UIJ66931.1 | GNAT_family_N-acetyltransferase_[Bacillus_cereus]                                                                   | CPTF_Ni         | 15339.53333 | 26568.8511  | 173.2050808 |
| UIJ66931.1 | GNAT_family_N-acetyltransferase_[Bacillus_cereus]                                                                   | CPTF_U          | 0           | 0           | 0           |
| UIJ66931.1 | GNAT_family_N-acetyltransferase_[Bacillus_cereus]                                                                   | CPTF_metals_mix | 600366      | 66187.4386  | 11.02451481 |
| UIJ66931.1 | GNAT_family_N-acetyltransferase_[Bacillus_cereus]                                                                   | CPTF_zcontrol   | 0           | 0           | 0           |
| UIJ66936.1 | formate_dehydrogenase_subunit_alpha_[Bacillus_cereus]                                                               | CPTF_Al         | 0           | 0           | 0           |
| UIJ66936.1 | formate_dehydrogenase_subunit_alpha_[Bacillus_cereus]                                                               | CPTF_Cd         | 42683.66667 | 73930.27932 | 173.2050808 |
| UIJ66936.1 | formate_dehydrogenase_subunit_alpha_[Bacillus_cereus]                                                               | CPTF_Co         | 67718.66667 | 117292.1713 | 173.2050808 |
| UIJ66936.1 | formate_dehydrogenase_subunit_alpha_[Bacillus_cereus]                                                               | CPTF_Cu         | 94386.96667 | 82365.88251 | 87.26404229 |
| UIJ66936.1 | formate_dehydrogenase_subunit_alpha_[Bacillus_cereus]                                                               | CPTF_Fe         | 108415.8667 | 133431.986  | 123.0742235 |
| UIJ66936.1 | formate_dehydrogenase_subunit_alpha_[Bacillus_cereus]                                                               | CPTF_Mn         | 18026.36667 | 31222.58294 | 173.2050808 |
| UIJ66936.1 | formate_dehydrogenase_subunit_alpha_[Bacillus_cereus]                                                               | CPTF_Ni         | 0           | 0           | 0           |
| UIJ66936.1 | formate_dehydrogenase_subunit_alpha_[Bacillus_cereus]                                                               | CPTF_U          | 11648.76667 | 20176.25571 | 173.2050808 |
| UIJ66936.1 | formate_dehydrogenase_subunit_alpha_[Bacillus_cereus]                                                               | CPTF_metals_mix | 12111.56667 | 20977.84883 | 173.2050808 |
| UIJ66936.1 | formate_dehydrogenase_subunit_alpha_[Bacillus_cereus]                                                               | CPTF_zcontrol   | 119109.3333 | 103708.6344 | 87.07011571 |
| UIJ66938.1 | alanine_dehydrogenase_[Bacillus_cereus]                                                                             | CPTF_Al         | 212303      | 30947.7024  | 14.57713852 |
| UIJ66938.1 | alanine_dehydrogenase_[Bacillus_cereus]                                                                             | CPTF_Cd         | 289658      | 9773.034994 | 3.37399105  |
| UIJ66938.1 | alanine_dehydrogenase_[Bacillus_cereus]                                                                             | CPTF_Co         | 144162      | 27791.18312 | 19.27774526 |
| UIJ66938.1 | alanine_dehydrogenase_[Bacillus_cereus]                                                                             | CPTF_Cu         | 191842      | 4781.972815 | 2.492662094 |
| UIJ66938.1 | alanine_dehydrogenase_[Bacillus_cereus]                                                                             | CPTF_Fe         | 178755.3333 | 82081.32982 | 45.91825502 |
| UIJ66938.1 | alanine_dehydrogenase_[Bacillus_cereus]                                                                             | CPTF_Mn         | 150045.1333 | 51450.86166 | 34.29025688 |
| UIJ66938.1 | alanine_dehydrogenase_[Bacillus_cereus]                                                                             | CPTF_Ni         | 143873.3333 | 51708.52044 | 35.94030891 |
| UIJ66938.1 | alanine_dehydrogenase_[Bacillus_cereus]                                                                             | CPTF_U          | 239036.3333 | 87740.67866 | 36.7060009  |

|            |                                                                          |                 |             |             |             |
|------------|--------------------------------------------------------------------------|-----------------|-------------|-------------|-------------|
| UIJ66938.1 | alanine_dehydrogenase_[Bacillus_cereus]                                  | CPTF_metals_mix | 346365.3    | 77021.27241 | 22.23700596 |
| UIJ66938.1 | alanine_dehydrogenase_[Bacillus_cereus]                                  | CPTF_zcontrol   | 102140.4667 | 38141.73064 | 37.3424284  |
| UIJ66941.1 | cadmium-translocating_P-type_ATPase_[Bacillus_cereus]                    | CPTF_Al         | 0           | 0           | 0           |
| UIJ66941.1 | cadmium-translocating_P-type_ATPase_[Bacillus_cereus]                    | CPTF_Cd         | 62068.66667 | 58104.7804  | 93.61370804 |
| UIJ66941.1 | cadmium-translocating_P-type_ATPase_[Bacillus_cereus]                    | CPTF_Co         | 0           | 0           | 0           |
| UIJ66941.1 | cadmium-translocating_P-type_ATPase_[Bacillus_cereus]                    | CPTF_Cu         | 9718.5      | 16832.93577 | 173.2050808 |
| UIJ66941.1 | cadmium-translocating_P-type_ATPase_[Bacillus_cereus]                    | CPTF_Fe         | 0           | 0           | 0           |
| UIJ66941.1 | cadmium-translocating_P-type_ATPase_[Bacillus_cereus]                    | CPTF_Mn         | 0           | 0           | 0           |
| UIJ66941.1 | cadmium-translocating_P-type_ATPase_[Bacillus_cereus]                    | CPTF_Ni         | 51079.4     | 49179.49919 | 96.28049505 |
| UIJ66941.1 | cadmium-translocating_P-type_ATPase_[Bacillus_cereus]                    | CPTF_U          | 0           | 0           | 0           |
| UIJ66941.1 | cadmium-translocating_P-type_ATPase_[Bacillus_cereus]                    | CPTF_metals_mix | 1412729.633 | 350475.949  | 24.80842341 |
| UIJ66941.1 | cadmium-translocating_P-type_ATPase_[Bacillus_cereus]                    | CPTF_zcontrol   | 0           | 0           | 0           |
| UIJ66942.1 | nicotinate_phosphoribosyltransferase_[Bacillus_cereus]                   | CPTF_Al         | 563532.8667 | 165240.2979 | 29.32221129 |
| UIJ66942.1 | nicotinate_phosphoribosyltransferase_[Bacillus_cereus]                   | CPTF_Cd         | 1037282.633 | 139992.8507 | 13.49611438 |
| UIJ66942.1 | nicotinate_phosphoribosyltransferase_[Bacillus_cereus]                   | CPTF_Co         | 448816.6667 | 267154.2385 | 59.52413498 |
| UIJ66942.1 | nicotinate_phosphoribosyltransferase_[Bacillus_cereus]                   | CPTF_Cu         | 501542.2667 | 94586.97196 | 18.85922249 |
| UIJ66942.1 | nicotinate_phosphoribosyltransferase_[Bacillus_cereus]                   | CPTF_Fe         | 558595.1333 | 181301.3492 | 32.45666465 |
| UIJ66942.1 | nicotinate_phosphoribosyltransferase_[Bacillus_cereus]                   | CPTF_Mn         | 302180.5333 | 46528.60111 | 15.39761698 |
| UIJ66942.1 | nicotinate_phosphoribosyltransferase_[Bacillus_cereus]                   | CPTF_Ni         | 352350.7333 | 108079.4139 | 30.6738155  |
| UIJ66942.1 | nicotinate_phosphoribosyltransferase_[Bacillus_cereus]                   | CPTF_U          | 245360.1667 | 151487.1904 | 61.74074318 |
| UIJ66942.1 | nicotinate_phosphoribosyltransferase_[Bacillus_cereus]                   | CPTF_metals_mix | 1021395     | 94010.09949 | 9.204088476 |
| UIJ66942.1 | nicotinate_phosphoribosyltransferase_[Bacillus_cereus]                   | CPTF_zcontrol   | 296881.4    | 134891.9547 | 45.43631049 |
| UIJ66943.1 | tetratricopeptide_repeat_protein_[Bacillus_cereus]                       | CPTF_Al         | 1026374.733 | 66791.76662 | 6.507541977 |
| UIJ66943.1 | tetratricopeptide_repeat_protein_[Bacillus_cereus]                       | CPTF_Cd         | 927373.3    | 70252.01427 | 7.575375986 |
| UIJ66943.1 | tetratricopeptide_repeat_protein_[Bacillus_cereus]                       | CPTF_Co         | 582819.2333 | 504751.2915 | 86.60511915 |
| UIJ66943.1 | tetratricopeptide_repeat_protein_[Bacillus_cereus]                       | CPTF_Cu         | 356611.8667 | 564182.483  | 158.2063122 |
| UIJ66943.1 | tetratricopeptide_repeat_protein_[Bacillus_cereus]                       | CPTF_Fe         | 977898.0667 | 119834.7154 | 12.25431561 |
| UIJ66943.1 | tetratricopeptide_repeat_protein_[Bacillus_cereus]                       | CPTF_Mn         | 766213.2667 | 333485.9972 | 43.52391322 |
| UIJ66943.1 | tetratricopeptide_repeat_protein_[Bacillus_cereus]                       | CPTF_Ni         | 920522.8667 | 37902.75599 | 4.117524655 |
| UIJ66943.1 | tetratricopeptide_repeat_protein_[Bacillus_cereus]                       | CPTF_U          | 600252.3333 | 547851.0315 | 91.2701211  |
| UIJ66943.1 | tetratricopeptide_repeat_protein_[Bacillus_cereus]                       | CPTF_metals_mix | 539703.3333 | 39336.01444 | 7.288451268 |
| UIJ66943.1 | tetratricopeptide_repeat_protein_[Bacillus_cereus]                       | CPTF_zcontrol   | 913414.3667 | 36977.35249 | 4.048256065 |
| UIJ66955.1 | metalloregulator_ArsR/SmtB_family_transcription_factor_[Bacillus_cereus] | CPTF_Al         | 26329.36667 | 45603.8008  | 173.2050808 |
| UIJ66955.1 | metalloregulator_ArsR/SmtB_family_transcription_factor_[Bacillus_cereus] | CPTF_Cd         | 177592      | 224020.2235 | 126.1431954 |
| UIJ66955.1 | metalloregulator_ArsR/SmtB_family_transcription_factor_[Bacillus_cereus] | CPTF_Co         | 62229.93333 | 53908.39946 | 86.62776348 |
| UIJ66955.1 | metalloregulator_ArsR/SmtB_family_transcription_factor_[Bacillus_cereus] | CPTF_Cu         | 0           | 0           | 0           |
| UIJ66955.1 | metalloregulator_ArsR/SmtB_family_transcription_factor_[Bacillus_cereus] | CPTF_Fe         | 20785.5     | 36001.54206 | 173.2050808 |
| UIJ66955.1 | metalloregulator_ArsR/SmtB_family_transcription_factor_[Bacillus_cereus] | CPTF_Mn         | 17544.1     | 30387.27257 | 173.2050808 |
| UIJ66955.1 | metalloregulator_ArsR/SmtB_family_transcription_factor_[Bacillus_cereus] | CPTF_Ni         | 0           | 0           | 0           |
| UIJ66955.1 | metalloregulator_ArsR/SmtB_family_transcription_factor_[Bacillus_cereus] | CPTF_U          | 0           | 0           | 0           |
| UIJ66955.1 | metalloregulator_ArsR/SmtB_family_transcription_factor_[Bacillus_cereus] | CPTF_metals_mix | 459950.5333 | 430788.043  | 93.65964636 |
| UIJ66955.1 | metalloregulator_ArsR/SmtB_family_transcription_factor_[Bacillus_cereus] | CPTF_zcontrol   | 0           | 0           | 0           |
| UIJ66957.1 | peptide_MFS_transporter_[Bacillus_cereus]                                | CPTF_Al         | 93040.33333 | 85736.34717 | 92.14965607 |
| UIJ66957.1 | peptide_MFS_transporter_[Bacillus_cereus]                                | CPTF_Cd         | 57646.9     | 69371.46374 | 120.338585  |
| UIJ66957.1 | peptide_MFS_transporter_[Bacillus_cereus]                                | CPTF_Co         | 125682.4    | 118095.237  | 93.96322554 |
| UIJ66957.1 | peptide_MFS_transporter_[Bacillus_cereus]                                | CPTF_Cu         | 221160.8333 | 126699.6348 | 57.28845968 |
| UIJ66957.1 | peptide_MFS_transporter_[Bacillus_cereus]                                | CPTF_Fe         | 89759       | 80102.24791 | 89.2414665  |
| UIJ66957.1 | peptide_MFS_transporter_[Bacillus_cereus]                                | CPTF_Mn         | 33482       | 57992.52514 | 173.2050808 |
| UIJ66957.1 | peptide_MFS_transporter_[Bacillus_cereus]                                | CPTF_Ni         | 117576.5667 | 51895.15757 | 44.13733028 |
| UIJ66957.1 | peptide_MFS_transporter_[Bacillus_cereus]                                | CPTF_U          | 63790.63333 | 56190.63146 | 88.08602223 |
| UIJ66957.1 | peptide_MFS_transporter_[Bacillus_cereus]                                | CPTF_metals_mix | 452134.8    | 59909.80649 | 13.25043029 |
| UIJ66957.1 | peptide_MFS_transporter_[Bacillus_cereus]                                | CPTF_zcontrol   | 0           | 0           | 0           |
| UIJ66964.1 | glycine_C-acetyltransferase_[Bacillus_cereus]                            | CPTF_Al         | 8718480.567 | 242996.6074 | 2.787143994 |
| UIJ66964.1 | glycine_C-acetyltransferase_[Bacillus_cereus]                            | CPTF_Cd         | 8459969.533 | 99820.33257 | 1.179913618 |
| UIJ66964.1 | glycine_C-acetyltransferase_[Bacillus_cereus]                            | CPTF_Co         | 8105672.4   | 488276.1619 | 6.023882262 |
| UIJ66964.1 | glycine_C-acetyltransferase_[Bacillus_cereus]                            | CPTF_Cu         | 7727279.933 | 434866.2209 | 5.627675258 |
| UIJ66964.1 | glycine_C-acetyltransferase_[Bacillus_cereus]                            | CPTF_Fe         | 7546359.467 | 218355.3736 | 2.893519379 |
| UIJ66964.1 | glycine_C-acetyltransferase_[Bacillus_cereus]                            | CPTF_Mn         | 7821257.767 | 377164.9791 | 4.822305956 |
| UIJ66964.1 | glycine_C-acetyltransferase_[Bacillus_cereus]                            | CPTF_Ni         | 7634274.633 | 396103.7416 | 5.18849217  |
| UIJ66964.1 | glycine_C-acetyltransferase_[Bacillus_cereus]                            | CPTF_U          | 7110824     | 180667.5381 | 2.540739837 |
| UIJ66964.1 | glycine_C-acetyltransferase_[Bacillus_cereus]                            | CPTF_metals_mix | 7137357.1   | 940677.1881 | 13.17962903 |

|            |                                                               |                 |             |             |             |
|------------|---------------------------------------------------------------|-----------------|-------------|-------------|-------------|
| UIJ66964.1 | glycine_C-acetyltransferase [Bacillus cereus]                 | CPTF_zcontrol   | 8751472.867 | 438175.6981 | 5.006879468 |
| UIJ66965.1 | L-threonine_3-dehydrogenase [Bacillus cereus]                 | CPTF_Al         | 147759.1333 | 193729.1196 | 131.1114347 |
| UIJ66965.1 | L-threonine_3-dehydrogenase [Bacillus cereus]                 | CPTF_Cd         | 198147.3667 | 172327.6282 | 86.96942639 |
| UIJ66965.1 | L-threonine_3-dehydrogenase [Bacillus cereus]                 | CPTF_Co         | 124058.8    | 35266.1362  | 28.42695254 |
| UIJ66965.1 | L-threonine_3-dehydrogenase [Bacillus cereus]                 | CPTF_Cu         | 152409.4    | 220355.5433 | 144.5813338 |
| UIJ66965.1 | L-threonine_3-dehydrogenase [Bacillus cereus]                 | CPTF_Fe         | 75255.03333 | 41554.29827 | 55.2179654  |
| UIJ66965.1 | L-threonine_3-dehydrogenase [Bacillus cereus]                 | CPTF_Mn         | 112902.3    | 137002.8311 | 121.3463597 |
| UIJ66965.1 | L-threonine_3-dehydrogenase [Bacillus cereus]                 | CPTF_Ni         | 145398.5667 | 125992.1097 | 86.65292419 |
| UIJ66965.1 | L-threonine_3-dehydrogenase [Bacillus cereus]                 | CPTF_U          | 109602.2667 | 189836.6945 | 173.2050808 |
| UIJ66965.1 | L-threonine_3-dehydrogenase [Bacillus cereus]                 | CPTF_metals_mix | 213646.2333 | 166744.9818 | 78.04723687 |
| UIJ66965.1 | L-threonine_3-dehydrogenase [Bacillus cereus]                 | CPTF_zcontrol   | 375747.0333 | 170723.0432 | 45.43563304 |
| UIJ66966.1 | NUDIX_hydrolase [Bacillus cereus]                             | CPTF_Al         | 1280406.533 | 89886.83488 | 7.020179337 |
| UIJ66966.1 | NUDIX_hydrolase [Bacillus cereus]                             | CPTF_Cd         | 1174749.867 | 116047.1557 | 9.878456601 |
| UIJ66966.1 | NUDIX_hydrolase [Bacillus cereus]                             | CPTF_Co         | 1276554.967 | 29669.6557  | 2.324197272 |
| UIJ66966.1 | NUDIX_hydrolase [Bacillus cereus]                             | CPTF_Cu         | 1177403.6   | 117819.3818 | 10.00671153 |
| UIJ66966.1 | NUDIX_hydrolase [Bacillus cereus]                             | CPTF_Fe         | 1190856.633 | 17261.49936 | 1.449502726 |
| UIJ66966.1 | NUDIX_hydrolase [Bacillus cereus]                             | CPTF_Mn         | 1199829.1   | 164539.8238 | 13.71360503 |
| UIJ66966.1 | NUDIX_hydrolase [Bacillus cereus]                             | CPTF_Ni         | 1259485.7   | 58677.75093 | 4.65886599  |
| UIJ66966.1 | NUDIX_hydrolase [Bacillus cereus]                             | CPTF_U          | 1147041.033 | 68510.23611 | 5.972779884 |
| UIJ66966.1 | NUDIX_hydrolase [Bacillus cereus]                             | CPTF_metals_mix | 883157.8667 | 28030.24197 | 3.173865402 |
| UIJ66966.1 | NUDIX_hydrolase [Bacillus cereus]                             | CPTF_zcontrol   | 1213055.3   | 89584.12537 | 7.384999297 |
| UIJ66975.1 | alpha,alpha-phosphotrehalase [Bacillus cereus]                | CPTF_Al         | 80337.76667 | 56792.8196  | 70.69255464 |
| UIJ66975.1 | alpha,alpha-phosphotrehalase [Bacillus cereus]                | CPTF_Cd         | 132412.2    | 84376.55466 | 63.72264388 |
| UIJ66975.1 | alpha,alpha-phosphotrehalase [Bacillus cereus]                | CPTF_Co         | 142740.5667 | 68283.11384 | 47.83721645 |
| UIJ66975.1 | alpha,alpha-phosphotrehalase [Bacillus cereus]                | CPTF_Cu         | 150220.4333 | 64256.89348 | 42.77506865 |
| UIJ66975.1 | alpha,alpha-phosphotrehalase [Bacillus cereus]                | CPTF_Fe         | 91780.03333 | 113275.5809 | 123.4207232 |
| UIJ66975.1 | alpha,alpha-phosphotrehalase [Bacillus cereus]                | CPTF_Mn         | 20871.8     | 18205.70498 | 87.22632923 |
| UIJ66975.1 | alpha,alpha-phosphotrehalase [Bacillus cereus]                | CPTF_Ni         | 88582.26667 | 78219.35855 | 88.30137396 |
| UIJ66975.1 | alpha,alpha-phosphotrehalase [Bacillus cereus]                | CPTF_U          | 51836.66667 | 45246.4717  | 87.28661507 |
| UIJ66975.1 | alpha,alpha-phosphotrehalase [Bacillus cereus]                | CPTF_metals_mix | 145602.3333 | 104488.2537 | 71.76276049 |
| UIJ66975.1 | alpha,alpha-phosphotrehalase [Bacillus cereus]                | CPTF_zcontrol   | 78689.4     | 52606.00921 | 66.85272631 |
| UIJ66981.1 | phosphotransferase [Bacillus cereus]                          | CPTF_Al         | 456803.8333 | 63941.3175  | 13.99754399 |
| UIJ66981.1 | phosphotransferase [Bacillus cereus]                          | CPTF_Cd         | 528031.7667 | 28886.47487 | 5.470594138 |
| UIJ66981.1 | phosphotransferase [Bacillus cereus]                          | CPTF_Co         | 385578      | 87311.00084 | 22.64418635 |
| UIJ66981.1 | phosphotransferase [Bacillus cereus]                          | CPTF_Cu         | 437665.7    | 71464.09659 | 16.32846636 |
| UIJ66981.1 | phosphotransferase [Bacillus cereus]                          | CPTF_Fe         | 549453.0667 | 154619.7897 | 28.14067281 |
| UIJ66981.1 | phosphotransferase [Bacillus cereus]                          | CPTF_Mn         | 421702.8    | 89865.28449 | 21.31009908 |
| UIJ66981.1 | phosphotransferase [Bacillus cereus]                          | CPTF_Ni         | 610651.6667 | 170802.3774 | 27.97050867 |
| UIJ66981.1 | phosphotransferase [Bacillus cereus]                          | CPTF_U          | 445902.3333 | 122006.9824 | 27.36181743 |
| UIJ66981.1 | phosphotransferase [Bacillus cereus]                          | CPTF_metals_mix | 247514.7667 | 52867.07848 | 21.35916139 |
| UIJ66981.1 | phosphotransferase [Bacillus cereus]                          | CPTF_zcontrol   | 460505.7333 | 92415.0284  | 20.06816022 |
| UIJ66992.1 | response_regulator_transcription_factor [Bacillus cereus]     | CPTF_Al         | 551546.6667 | 264260.9644 | 47.91271172 |
| UIJ66992.1 | response_regulator_transcription_factor [Bacillus cereus]     | CPTF_Cd         | 566813.1333 | 166726.4954 | 29.41471987 |
| UIJ66992.1 | response_regulator_transcription_factor [Bacillus cereus]     | CPTF_Co         | 679373.6667 | 48965.23    | 7.207407706 |
| UIJ66992.1 | response_regulator_transcription_factor [Bacillus cereus]     | CPTF_Cu         | 920373      | 96427.75554 | 10.47703002 |
| UIJ66992.1 | response_regulator_transcription_factor [Bacillus cereus]     | CPTF_Fe         | 414300.6333 | 194513.7024 | 46.94989261 |
| UIJ66992.1 | response_regulator_transcription_factor [Bacillus cereus]     | CPTF_Mn         | 614654.4667 | 164117.4292 | 26.70076248 |
| UIJ66992.1 | response_regulator_transcription_factor [Bacillus cereus]     | CPTF_Ni         | 421057.3333 | 291513.0404 | 69.23357398 |
| UIJ66992.1 | response_regulator_transcription_factor [Bacillus cereus]     | CPTF_U          | 306086.6667 | 65303.17059 | 21.33486287 |
| UIJ66992.1 | response_regulator_transcription_factor [Bacillus cereus]     | CPTF_metals_mix | 1015248.833 | 144246.0383 | 14.20794918 |
| UIJ66992.1 | response_regulator_transcription_factor [Bacillus cereus]     | CPTF_zcontrol   | 416573.3333 | 309233.4732 | 74.23266168 |
| UIJ66993.1 | cell_wall-binding_repeat-containing_protein [Bacillus cereus] | CPTF_Al         | 10025654.87 | 526672.2609 | 5.253245478 |
| UIJ66993.1 | cell_wall-binding_repeat-containing_protein [Bacillus cereus] | CPTF_Cd         | 9320187.367 | 787752.5446 | 8.452110603 |
| UIJ66993.1 | cell_wall-binding_repeat-containing_protein [Bacillus cereus] | CPTF_Co         | 9320076.3   | 560327.0387 | 6.012043471 |
| UIJ66993.1 | cell_wall-binding_repeat-containing_protein [Bacillus cereus] | CPTF_Cu         | 9948521.933 | 834880.983  | 8.392010276 |
| UIJ66993.1 | cell_wall-binding_repeat-containing_protein [Bacillus cereus] | CPTF_Fe         | 9490989.2   | 716397.8102 | 7.548189079 |
| UIJ66993.1 | cell_wall-binding_repeat-containing_protein [Bacillus cereus] | CPTF_Mn         | 9699036.4   | 2011582.438 | 20.7400236  |
| UIJ66993.1 | cell_wall-binding_repeat-containing_protein [Bacillus cereus] | CPTF_Ni         | 8650385.633 | 972441.9507 | 11.2416023  |
| UIJ66993.1 | cell_wall-binding_repeat-containing_protein [Bacillus cereus] | CPTF_U          | 8096068.667 | 1181028.296 | 14.58767637 |
| UIJ66993.1 | cell_wall-binding_repeat-containing_protein [Bacillus cereus] | CPTF_metals_mix | 10941579.63 | 677285.6118 | 6.190016748 |
| UIJ66993.1 | cell_wall-binding_repeat-containing_protein [Bacillus cereus] | CPTF_zcontrol   | 9338794.1   | 316450.8722 | 3.388562471 |

|            |                                                                         |                 |             |             |             |
|------------|-------------------------------------------------------------------------|-----------------|-------------|-------------|-------------|
| UIJ66994.1 | DUF4352_domain-containing_protein_[Bacillus_cereus]                     | CPTF_Al         | 267638      | 297783.6802 | 111.2636024 |
| UIJ66994.1 | DUF4352_domain-containing_protein_[Bacillus_cereus]                     | CPTF_Cd         | 369814.6667 | 195283.7813 | 52.80585085 |
| UIJ66994.1 | DUF4352_domain-containing_protein_[Bacillus_cereus]                     | CPTF_Co         | 406573      | 252745.1604 | 62.16476755 |
| UIJ66994.1 | DUF4352_domain-containing_protein_[Bacillus_cereus]                     | CPTF_Cu         | 107130.6667 | 93863.57137 | 87.6159687  |
| UIJ66994.1 | DUF4352_domain-containing_protein_[Bacillus_cereus]                     | CPTF_Fe         | 369978      | 221040.073  | 59.74411262 |
| UIJ66994.1 | DUF4352_domain-containing_protein_[Bacillus_cereus]                     | CPTF_Mn         | 362224.6667 | 243029.1915 | 67.0934958  |
| UIJ66994.1 | DUF4352_domain-containing_protein_[Bacillus_cereus]                     | CPTF_Ni         | 199561.3333 | 11223.56763 | 5.624119383 |
| UIJ66994.1 | DUF4352_domain-containing_protein_[Bacillus_cereus]                     | CPTF_U          | 290103      | 121715.8921 | 41.95609564 |
| UIJ66994.1 | DUF4352_domain-containing_protein_[Bacillus_cereus]                     | CPTF_metals_mix | 27838.83333 | 24697.37339 | 88.71554744 |
| UIJ66994.1 | DUF4352_domain-containing_protein_[Bacillus_cereus]                     | CPTF_zcontrol   | 215814.6667 | 38070.49911 | 17.64036694 |
| UIJ66997.1 | universal_stress_protein_[Bacillus_cereus]                              | CPTF_Al         | 0           | 0           | 0           |
| UIJ66997.1 | universal_stress_protein_[Bacillus_cereus]                              | CPTF_Cd         | 0           | 0           | 0           |
| UIJ66997.1 | universal_stress_protein_[Bacillus_cereus]                              | CPTF_Co         | 0           | 0           | 0           |
| UIJ66997.1 | universal_stress_protein_[Bacillus_cereus]                              | CPTF_Cu         | 77829.5     | 67531.30238 | 86.76825931 |
| UIJ66997.1 | universal_stress_protein_[Bacillus_cereus]                              | CPTF_Fe         | 0           | 0           | 0           |
| UIJ66997.1 | universal_stress_protein_[Bacillus_cereus]                              | CPTF_Mn         | 0           | 0           | 0           |
| UIJ66997.1 | universal_stress_protein_[Bacillus_cereus]                              | CPTF_Ni         | 0           | 0           | 0           |
| UIJ66997.1 | universal_stress_protein_[Bacillus_cereus]                              | CPTF_U          | 0           | 0           | 0           |
| UIJ66997.1 | universal_stress_protein_[Bacillus_cereus]                              | CPTF_metals_mix | 78408.83333 | 29140.10049 | 37.16430821 |
| UIJ66997.1 | universal_stress_protein_[Bacillus_cereus]                              | CPTF_zcontrol   | 0           | 0           | 0           |
| UIJ67002.1 | ribose_operon_transcriptional_repressor_RbsR_[Bacillus_cereus]          | CPTF_Al         | 27371.9     | 24630.74886 | 89.98552843 |
| UIJ67002.1 | ribose_operon_transcriptional_repressor_RbsR_[Bacillus_cereus]          | CPTF_Cd         | 10529.6     | 18237.80218 | 173.2050808 |
| UIJ67002.1 | ribose_operon_transcriptional_repressor_RbsR_[Bacillus_cereus]          | CPTF_Co         | 0           | 0           | 0           |
| UIJ67002.1 | ribose_operon_transcriptional_repressor_RbsR_[Bacillus_cereus]          | CPTF_Cu         | 72050.93333 | 33467.40455 | 46.44964749 |
| UIJ67002.1 | ribose_operon_transcriptional_repressor_RbsR_[Bacillus_cereus]          | CPTF_Fe         | 0           | 0           | 0           |
| UIJ67002.1 | ribose_operon_transcriptional_repressor_RbsR_[Bacillus_cereus]          | CPTF_Mn         | 12062.03333 | 20892.05458 | 173.2050808 |
| UIJ67002.1 | ribose_operon_transcriptional_repressor_RbsR_[Bacillus_cereus]          | CPTF_Ni         | 15079.83333 | 26119.0375  | 173.2050808 |
| UIJ67002.1 | ribose_operon_transcriptional_repressor_RbsR_[Bacillus_cereus]          | CPTF_U          | 0           | 0           | 0           |
| UIJ67002.1 | ribose_operon_transcriptional_repressor_RbsR_[Bacillus_cereus]          | CPTF_metals_mix | 81536.73333 | 27502.72628 | 33.73047357 |
| UIJ67002.1 | ribose_operon_transcriptional_repressor_RbsR_[Bacillus_cereus]          | CPTF_zcontrol   | 10035.46667 | 17381.93814 | 173.2050808 |
| UIJ67003.1 | D-ribose_pyranase_[Bacillus_cereus]                                     | CPTF_Al         | 0           | 0           | 0           |
| UIJ67003.1 | D-ribose_pyranase_[Bacillus_cereus]                                     | CPTF_Cd         | 0           | 0           | 0           |
| UIJ67003.1 | D-ribose_pyranase_[Bacillus_cereus]                                     | CPTF_Co         | 0           | 0           | 0           |
| UIJ67003.1 | D-ribose_pyranase_[Bacillus_cereus]                                     | CPTF_Cu         | 0           | 0           | 0           |
| UIJ67003.1 | D-ribose_pyranase_[Bacillus_cereus]                                     | CPTF_Fe         | 0           | 0           | 0           |
| UIJ67003.1 | D-ribose_pyranase_[Bacillus_cereus]                                     | CPTF_Mn         | 0           | 0           | 0           |
| UIJ67003.1 | D-ribose_pyranase_[Bacillus_cereus]                                     | CPTF_Ni         | 0           | 0           | 0           |
| UIJ67003.1 | D-ribose_pyranase_[Bacillus_cereus]                                     | CPTF_U          | 0           | 0           | 0           |
| UIJ67003.1 | D-ribose_pyranase_[Bacillus_cereus]                                     | CPTF_metals_mix | 176511.3333 | 34863.81867 | 19.75160349 |
| UIJ67003.1 | D-ribose_pyranase_[Bacillus_cereus]                                     | CPTF_zcontrol   | 0           | 0           | 0           |
| UIJ67006.1 | ribose_ABC_transporter_substrate-binding_protein_RbsB_[Bacillus_cereus] | CPTF_Al         | 72883.66667 | 63437.56854 | 87.03948558 |
| UIJ67006.1 | ribose_ABC_transporter_substrate-binding_protein_RbsB_[Bacillus_cereus] | CPTF_Cd         | 75419       | 66842.14409 | 88.62772523 |
| UIJ67006.1 | ribose_ABC_transporter_substrate-binding_protein_RbsB_[Bacillus_cereus] | CPTF_Co         | 104307.1    | 21023.61635 | 20.15549886 |
| UIJ67006.1 | ribose_ABC_transporter_substrate-binding_protein_RbsB_[Bacillus_cereus] | CPTF_Cu         | 75307.33333 | 65615.61388 | 87.13044397 |
| UIJ67006.1 | ribose_ABC_transporter_substrate-binding_protein_RbsB_[Bacillus_cereus] | CPTF_Fe         | 0           | 0           | 0           |
| UIJ67006.1 | ribose_ABC_transporter_substrate-binding_protein_RbsB_[Bacillus_cereus] | CPTF_Mn         | 59984.43333 | 61353.50657 | 102.2823809 |
| UIJ67006.1 | ribose_ABC_transporter_substrate-binding_protein_RbsB_[Bacillus_cereus] | CPTF_Ni         | 114046.1667 | 26346.01789 | 23.1011867  |
| UIJ67006.1 | ribose_ABC_transporter_substrate-binding_protein_RbsB_[Bacillus_cereus] | CPTF_U          | 0           | 0           | 0           |
| UIJ67006.1 | ribose_ABC_transporter_substrate-binding_protein_RbsB_[Bacillus_cereus] | CPTF_metals_mix | 24475.76667 | 42393.27142 | 173.2050808 |
| UIJ67006.1 | ribose_ABC_transporter_substrate-binding_protein_RbsB_[Bacillus_cereus] | CPTF_zcontrol   | 67148.93333 | 63777.56036 | 94.97926057 |
| UIJ67007.1 | fructose-6-phosphate_aldolase_[Bacillus_cereus]                         | CPTF_Al         | 1028163.667 | 114958.9912 | 11.18100113 |
| UIJ67007.1 | fructose-6-phosphate_aldolase_[Bacillus_cereus]                         | CPTF_Cd         | 1881394.2   | 558837.8342 | 29.70338881 |
| UIJ67007.1 | fructose-6-phosphate_aldolase_[Bacillus_cereus]                         | CPTF_Co         | 1088595.333 | 80908.31781 | 7.43235942  |
| UIJ67007.1 | fructose-6-phosphate_aldolase_[Bacillus_cereus]                         | CPTF_Cu         | 1230253     | 29264.71696 | 2.378755993 |
| UIJ67007.1 | fructose-6-phosphate_aldolase_[Bacillus_cereus]                         | CPTF_Fe         | 1462741     | 772779.8516 | 52.83094216 |
| UIJ67007.1 | fructose-6-phosphate_aldolase_[Bacillus_cereus]                         | CPTF_Mn         | 1858699     | 976905.9542 | 52.55858825 |
| UIJ67007.1 | fructose-6-phosphate_aldolase_[Bacillus_cereus]                         | CPTF_Ni         | 994530.6667 | 141464.222  | 14.2242192  |
| UIJ67007.1 | fructose-6-phosphate_aldolase_[Bacillus_cereus]                         | CPTF_U          | 811104.1667 | 124858.431  | 15.39363698 |
| UIJ67007.1 | fructose-6-phosphate_aldolase_[Bacillus_cereus]                         | CPTF_metals_mix | 6382616.667 | 986643.319  | 15.45828883 |
| UIJ67007.1 | fructose-6-phosphate_aldolase_[Bacillus_cereus]                         | CPTF_zcontrol   | 950094.6667 | 193440.6527 | 20.3601451  |
| UIJ67011.1 | (R,R)-butanediol_dehydrogenase_[Bacillus_cereus]                        | CPTF_Al         | 2255008.133 | 39312.63569 | 1.743347845 |

|            |                                                               |                 |             |             |             |
|------------|---------------------------------------------------------------|-----------------|-------------|-------------|-------------|
| UIJ67011.1 | (R,R)-butanediol_dehydrogenase_[Bacillus_cereus]              | CPTF_Cd         | 1941651.633 | 295922.6824 | 15.24077117 |
| UIJ67011.1 | (R,R)-butanediol_dehydrogenase_[Bacillus_cereus]              | CPTF_Co         | 1884027.1   | 358239.4318 | 19.01455833 |
| UIJ67011.1 | (R,R)-butanediol_dehydrogenase_[Bacillus_cereus]              | CPTF_Cu         | 2658893     | 232861.7875 | 8.757847252 |
| UIJ67011.1 | (R,R)-butanediol_dehydrogenase_[Bacillus_cereus]              | CPTF_Fe         | 1899383.033 | 268323.9578 | 14.12690085 |
| UIJ67011.1 | (R,R)-butanediol_dehydrogenase_[Bacillus_cereus]              | CPTF_Mn         | 2182563.567 | 418416.1402 | 19.170857   |
| UIJ67011.1 | (R,R)-butanediol_dehydrogenase_[Bacillus_cereus]              | CPTF_Ni         | 2045981.167 | 245075.6213 | 11.97839087 |
| UIJ67011.1 | (R,R)-butanediol_dehydrogenase_[Bacillus_cereus]              | CPTF_U          | 1999639.467 | 328449.9726 | 16.42545959 |
| UIJ67011.1 | (R,R)-butanediol_dehydrogenase_[Bacillus_cereus]              | CPTF_metals_mix | 6056616.667 | 510057.3259 | 8.421489322 |
| UIJ67011.1 | (R,R)-butanediol_dehydrogenase_[Bacillus_cereus]              | CPTF_zcontrol   | 1408226.633 | 348236.4876 | 24.72872472 |
| UIJ67016.1 | AimR_family_lys-lysogeny_pheromone_receptor_[Bacillus_cereus] | CPTF_AI         | 197308.6667 | 172365.5355 | 87.35831954 |
| UIJ67016.1 | AimR_family_lys-lysogeny_pheromone_receptor_[Bacillus_cereus] | CPTF_Cd         | 152304.6667 | 132203.0787 | 86.80172551 |
| UIJ67016.1 | AimR_family_lys-lysogeny_pheromone_receptor_[Bacillus_cereus] | CPTF_Co         | 299121.6667 | 51718.11756 | 17.28999378 |
| UIJ67016.1 | AimR_family_lys-lysogeny_pheromone_receptor_[Bacillus_cereus] | CPTF_Cu         | 200287.6667 | 22847.60518 | 11.40739495 |
| UIJ67016.1 | AimR_family_lys-lysogeny_pheromone_receptor_[Bacillus_cereus] | CPTF_Fe         | 182061.3333 | 172697.3029 | 94.85666161 |
| UIJ67016.1 | AimR_family_lys-lysogeny_pheromone_receptor_[Bacillus_cereus] | CPTF_Mn         | 266405      | 38344.30196 | 14.3932366  |
| UIJ67016.1 | AimR_family_lys-lysogeny_pheromone_receptor_[Bacillus_cereus] | CPTF_Ni         | 253809.6667 | 55607.39825 | 21.90909392 |
| UIJ67016.1 | AimR_family_lys-lysogeny_pheromone_receptor_[Bacillus_cereus] | CPTF_U          | 345218.6667 | 50248.37957 | 14.5552217  |
| UIJ67016.1 | AimR_family_lys-lysogeny_pheromone_receptor_[Bacillus_cereus] | CPTF_metals_mix | 0           | 0           | 0           |
| UIJ67016.1 | AimR_family_lys-lysogeny_pheromone_receptor_[Bacillus_cereus] | CPTF_zcontrol   | 325635.3333 | 14753.89658 | 4.530803347 |
| UIJ67018.1 | helix-turn-helix_domain-containing_protein_[Bacillus_cereus]  | CPTF_AI         | 387743      | 53693.97824 | 13.84782659 |
| UIJ67018.1 | helix-turn-helix_domain-containing_protein_[Bacillus_cereus]  | CPTF_Cd         | 412934.7333 | 19766.73629 | 4.786891171 |
| UIJ67018.1 | helix-turn-helix_domain-containing_protein_[Bacillus_cereus]  | CPTF_Co         | 327648.3333 | 53896.44445 | 16.4494792  |
| UIJ67018.1 | helix-turn-helix_domain-containing_protein_[Bacillus_cereus]  | CPTF_Cu         | 354309.6667 | 37487.18667 | 10.58034544 |
| UIJ67018.1 | helix-turn-helix_domain-containing_protein_[Bacillus_cereus]  | CPTF_Fe         | 378742.4333 | 38106.90454 | 10.06142993 |
| UIJ67018.1 | helix-turn-helix_domain-containing_protein_[Bacillus_cereus]  | CPTF_Mn         | 184712.5333 | 160118.2717 | 86.68511489 |
| UIJ67018.1 | helix-turn-helix_domain-containing_protein_[Bacillus_cereus]  | CPTF_Ni         | 314237.3333 | 34400.7134  | 10.94736677 |
| UIJ67018.1 | helix-turn-helix_domain-containing_protein_[Bacillus_cereus]  | CPTF_U          | 240939.3333 | 209369.0154 | 86.8969846  |
| UIJ67018.1 | helix-turn-helix_domain-containing_protein_[Bacillus_cereus]  | CPTF_metals_mix | 269452.9667 | 195615.0017 | 72.59780591 |
| UIJ67018.1 | helix-turn-helix_domain-containing_protein_[Bacillus_cereus]  | CPTF_zcontrol   | 177247.6667 | 178784.3173 | 100.8669511 |
| UIJ67063.1 | cytochrome_aa3_quinol_oxidase_subunit_III_[Bacillus_cereus]   | CPTF_AI         | 0           | 0           | 0           |
| UIJ67063.1 | cytochrome_aa3_quinol_oxidase_subunit_III_[Bacillus_cereus]   | CPTF_Cd         | 0           | 0           | 0           |
| UIJ67063.1 | cytochrome_aa3_quinol_oxidase_subunit_III_[Bacillus_cereus]   | CPTF_Co         | 44069       | 38229.33397 | 86.74881202 |
| UIJ67063.1 | cytochrome_aa3_quinol_oxidase_subunit_III_[Bacillus_cereus]   | CPTF_Cu         | 51751.43333 | 44951.21142 | 86.85983851 |
| UIJ67063.1 | cytochrome_aa3_quinol_oxidase_subunit_III_[Bacillus_cereus]   | CPTF_Fe         | 0           | 0           | 0           |
| UIJ67063.1 | cytochrome_aa3_quinol_oxidase_subunit_III_[Bacillus_cereus]   | CPTF_Mn         | 15026.6     | 26026.83467 | 173.2050808 |
| UIJ67063.1 | cytochrome_aa3_quinol_oxidase_subunit_III_[Bacillus_cereus]   | CPTF_Ni         | 12695.26667 | 21988.84688 | 173.2050808 |
| UIJ67063.1 | cytochrome_aa3_quinol_oxidase_subunit_III_[Bacillus_cereus]   | CPTF_U          | 0           | 0           | 0           |
| UIJ67063.1 | cytochrome_aa3_quinol_oxidase_subunit_III_[Bacillus_cereus]   | CPTF_metals_mix | 89350.93333 | 31091.70062 | 34.7972869  |
| UIJ67063.1 | cytochrome_aa3_quinol_oxidase_subunit_III_[Bacillus_cereus]   | CPTF_zcontrol   | 9922.1      | 17185.58132 | 173.2050808 |
| UIJ67064.1 | cytochrome_aa3_quinol_oxidase_subunit_I_[Bacillus_cereus]     | CPTF_AI         | 1890453.967 | 250829.0894 | 13.26819345 |
| UIJ67064.1 | cytochrome_aa3_quinol_oxidase_subunit_I_[Bacillus_cereus]     | CPTF_Cd         | 1802700.5   | 66901.52489 | 3.711183577 |
| UIJ67064.1 | cytochrome_aa3_quinol_oxidase_subunit_I_[Bacillus_cereus]     | CPTF_Co         | 1580371.067 | 35181.17236 | 2.226133666 |
| UIJ67064.1 | cytochrome_aa3_quinol_oxidase_subunit_I_[Bacillus_cereus]     | CPTF_Cu         | 1614458     | 99451.40211 | 6.16004889  |
| UIJ67064.1 | cytochrome_aa3_quinol_oxidase_subunit_I_[Bacillus_cereus]     | CPTF_Fe         | 1883037.133 | 41076.81698 | 2.181413009 |
| UIJ67064.1 | cytochrome_aa3_quinol_oxidase_subunit_I_[Bacillus_cereus]     | CPTF_Mn         | 1906266.833 | 349972.3212 | 18.35904162 |
| UIJ67064.1 | cytochrome_aa3_quinol_oxidase_subunit_I_[Bacillus_cereus]     | CPTF_Ni         | 1795658.367 | 166254.3182 | 9.258683124 |
| UIJ67064.1 | cytochrome_aa3_quinol_oxidase_subunit_I_[Bacillus_cereus]     | CPTF_U          | 1964033.333 | 250752.2298 | 12.76720845 |
| UIJ67064.1 | cytochrome_aa3_quinol_oxidase_subunit_I_[Bacillus_cereus]     | CPTF_metals_mix | 1203998.533 | 71365.24154 | 5.927352863 |
| UIJ67064.1 | cytochrome_aa3_quinol_oxidase_subunit_I_[Bacillus_cereus]     | CPTF_zcontrol   | 2124714.533 | 103908.199  | 4.890454569 |
| UIJ67065.1 | cytochrome_aa3_quinol_oxidase_subunit_II_[Bacillus_cereus]    | CPTF_AI         | 1713729.333 | 568814.5142 | 33.19161918 |
| UIJ67065.1 | cytochrome_aa3_quinol_oxidase_subunit_II_[Bacillus_cereus]    | CPTF_Cd         | 2308098.4   | 59020.2204  | 2.557092904 |
| UIJ67065.1 | cytochrome_aa3_quinol_oxidase_subunit_II_[Bacillus_cereus]    | CPTF_Co         | 2048907     | 172818.2384 | 8.434655508 |
| UIJ67065.1 | cytochrome_aa3_quinol_oxidase_subunit_II_[Bacillus_cereus]    | CPTF_Cu         | 1909065.833 | 214877.8519 | 11.25565437 |
| UIJ67065.1 | cytochrome_aa3_quinol_oxidase_subunit_II_[Bacillus_cereus]    | CPTF_Fe         | 1938826.667 | 476720.7125 | 24.58810376 |
| UIJ67065.1 | cytochrome_aa3_quinol_oxidase_subunit_II_[Bacillus_cereus]    | CPTF_Mn         | 1846656     | 293274.0118 | 15.88135591 |
| UIJ67065.1 | cytochrome_aa3_quinol_oxidase_subunit_II_[Bacillus_cereus]    | CPTF_Ni         | 1969702.5   | 106339.9223 | 5.398780899 |
| UIJ67065.1 | cytochrome_aa3_quinol_oxidase_subunit_II_[Bacillus_cereus]    | CPTF_U          | 1436679.8   | 446993.1553 | 31.11292825 |
| UIJ67065.1 | cytochrome_aa3_quinol_oxidase_subunit_II_[Bacillus_cereus]    | CPTF_metals_mix | 1985966.833 | 391673.3884 | 19.72205083 |
| UIJ67065.1 | cytochrome_aa3_quinol_oxidase_subunit_II_[Bacillus_cereus]    | CPTF_zcontrol   | 1864997.333 | 352047.7138 | 18.87658001 |
| UIJ67098.1 | potassium-transporting_ATPase_subunit_KdpA_[Bacillus_cereus]  | CPTF_AI         | 235053.6667 | 154664.7268 | 65.79975074 |
| UIJ67098.1 | potassium-transporting_ATPase_subunit_KdpA_[Bacillus_cereus]  | CPTF_Cd         | 91090.23333 | 43625.01393 | 47.89208715 |

|            |                                                                           |                 |             |             |             |
|------------|---------------------------------------------------------------------------|-----------------|-------------|-------------|-------------|
| UIJ67098.1 | potassium-transporting_ATPase_subunit_KdpA_[Bacillus_cereus]              | CPTF_Co         | 666952      | 131367.4426 | 19.69668621 |
| UIJ67098.1 | potassium-transporting_ATPase_subunit_KdpA_[Bacillus_cereus]              | CPTF_Cu         | 273091      | 251510.3981 | 92.09765175 |
| UIJ67098.1 | potassium-transporting_ATPase_subunit_KdpA_[Bacillus_cereus]              | CPTF_Fe         | 207606.3333 | 135060.9402 | 65.05627164 |
| UIJ67098.1 | potassium-transporting_ATPase_subunit_KdpA_[Bacillus_cereus]              | CPTF_Mn         | 323788.3333 | 288749.5536 | 89.1784922  |
| UIJ67098.1 | potassium-transporting_ATPase_subunit_KdpA_[Bacillus_cereus]              | CPTF_Ni         | 526162.3333 | 76240.55932 | 14.48993105 |
| UIJ67098.1 | potassium-transporting_ATPase_subunit_KdpA_[Bacillus_cereus]              | CPTF_U          | 598364.6667 | 337287.8112 | 56.36827005 |
| UIJ67098.1 | potassium-transporting_ATPase_subunit_KdpA_[Bacillus_cereus]              | CPTF_metals_mix | 508105      | 48196.23036 | 9.485486339 |
| UIJ67098.1 | potassium-transporting_ATPase_subunit_KdpA_[Bacillus_cereus]              | CPTF_zcontrol   | 390225.6667 | 228704.2549 | 58.60820402 |
| UIJ67099.1 | K(+)-transporting_ATPase_subunit_C_[Bacillus_cereus]                      | CPTF_Al         | 389256.7667 | 161972.73   | 41.61076798 |
| UIJ67099.1 | K(+)-transporting_ATPase_subunit_C_[Bacillus_cereus]                      | CPTF_Cd         | 302938.2667 | 132376.0858 | 43.69738009 |
| UIJ67099.1 | K(+)-transporting_ATPase_subunit_C_[Bacillus_cereus]                      | CPTF_Co         | 562803.7667 | 165286.6739 | 29.36843775 |
| UIJ67099.1 | K(+)-transporting_ATPase_subunit_C_[Bacillus_cereus]                      | CPTF_Cu         | 415900.0667 | 42369.51619 | 10.18742712 |
| UIJ67099.1 | K(+)-transporting_ATPase_subunit_C_[Bacillus_cereus]                      | CPTF_Fe         | 227007.0667 | 42693.45827 | 18.80710539 |
| UIJ67099.1 | K(+)-transporting_ATPase_subunit_C_[Bacillus_cereus]                      | CPTF_Mn         | 307114.8    | 172849.5804 | 56.28174884 |
| UIJ67099.1 | K(+)-transporting_ATPase_subunit_C_[Bacillus_cereus]                      | CPTF_Ni         | 360316.6333 | 114319.975  | 31.72764297 |
| UIJ67099.1 | K(+)-transporting_ATPase_subunit_C_[Bacillus_cereus]                      | CPTF_U          | 257375.8    | 81595.4235  | 31.70283434 |
| UIJ67099.1 | K(+)-transporting_ATPase_subunit_C_[Bacillus_cereus]                      | CPTF_metals_mix | 350236.5667 | 83973.25868 | 23.97615403 |
| UIJ67099.1 | K(+)-transporting_ATPase_subunit_C_[Bacillus_cereus]                      | CPTF_zcontrol   | 211856.9667 | 87378.67891 | 41.24418483 |
| UIJ67109.1 | thioredoxin_family_protein_[Bacillus_cereus]                              | CPTF_Al         | 0           | 0           | 0           |
| UIJ67109.1 | thioredoxin_family_protein_[Bacillus_cereus]                              | CPTF_Cd         | 0           | 0           | 0           |
| UIJ67109.1 | thioredoxin_family_protein_[Bacillus_cereus]                              | CPTF_Co         | 0           | 0           | 0           |
| UIJ67109.1 | thioredoxin_family_protein_[Bacillus_cereus]                              | CPTF_Cu         | 0           | 0           | 0           |
| UIJ67109.1 | thioredoxin_family_protein_[Bacillus_cereus]                              | CPTF_Fe         | 0           | 0           | 0           |
| UIJ67109.1 | thioredoxin_family_protein_[Bacillus_cereus]                              | CPTF_Mn         | 15740.66667 | 27263.63441 | 173.2050808 |
| UIJ67109.1 | thioredoxin_family_protein_[Bacillus_cereus]                              | CPTF_Ni         | 0           | 0           | 0           |
| UIJ67109.1 | thioredoxin_family_protein_[Bacillus_cereus]                              | CPTF_U          | 0           | 0           | 0           |
| UIJ67109.1 | thioredoxin_family_protein_[Bacillus_cereus]                              | CPTF_metals_mix | 19492.8     | 17986.07301 | 92.27034091 |
| UIJ67109.1 | thioredoxin_family_protein_[Bacillus_cereus]                              | CPTF_zcontrol   | 0           | 0           | 0           |
| UIJ67113.1 | PCYCGC_domain-containing_protein_[Bacillus_cereus]                        | CPTF_Al         | 247123.9667 | 166324.9562 | 67.30425964 |
| UIJ67113.1 | PCYCGC_domain-containing_protein_[Bacillus_cereus]                        | CPTF_Cd         | 295200.6667 | 107341.5645 | 36.36223647 |
| UIJ67113.1 | PCYCGC_domain-containing_protein_[Bacillus_cereus]                        | CPTF_Co         | 268793      | 182490.5229 | 67.89258757 |
| UIJ67113.1 | PCYCGC_domain-containing_protein_[Bacillus_cereus]                        | CPTF_Cu         | 160172.6667 | 55574.26223 | 34.69647062 |
| UIJ67113.1 | PCYCGC_domain-containing_protein_[Bacillus_cereus]                        | CPTF_Fe         | 309063.3333 | 110737.7114 | 35.83010324 |
| UIJ67113.1 | PCYCGC_domain-containing_protein_[Bacillus_cereus]                        | CPTF_Mn         | 251197.6667 | 112487.6848 | 44.78054526 |
| UIJ67113.1 | PCYCGC_domain-containing_protein_[Bacillus_cereus]                        | CPTF_Ni         | 269447.3333 | 60767.79346 | 22.55275371 |
| UIJ67113.1 | PCYCGC_domain-containing_protein_[Bacillus_cereus]                        | CPTF_U          | 392176.6667 | 123901.2944 | 31.59323462 |
| UIJ67113.1 | PCYCGC_domain-containing_protein_[Bacillus_cereus]                        | CPTF_metals_mix | 261123.3333 | 29986.20011 | 11.48353911 |
| UIJ67113.1 | PCYCGC_domain-containing_protein_[Bacillus_cereus]                        | CPTF_zcontrol   | 305354.6667 | 130868.4094 | 42.85783833 |
| UIJ67136.1 | hypothetical_protein_LW858_02225_[Bacillus_cereus]                        | CPTF_Al         | 607751.6667 | 54858.4767  | 9.026462568 |
| UIJ67136.1 | hypothetical_protein_LW858_02225_[Bacillus_cereus]                        | CPTF_Cd         | 390277      | 340103.8014 | 87.14420819 |
| UIJ67136.1 | hypothetical_protein_LW858_02225_[Bacillus_cereus]                        | CPTF_Co         | 513270.3333 | 79243.52773 | 15.43894564 |
| UIJ67136.1 | hypothetical_protein_LW858_02225_[Bacillus_cereus]                        | CPTF_Cu         | 543840      | 98497.34114 | 18.11145579 |
| UIJ67136.1 | hypothetical_protein_LW858_02225_[Bacillus_cereus]                        | CPTF_Fe         | 300425      | 267482.2234 | 89.03460877 |
| UIJ67136.1 | hypothetical_protein_LW858_02225_[Bacillus_cereus]                        | CPTF_Mn         | 159090.3333 | 275552.5403 | 173.2050808 |
| UIJ67136.1 | hypothetical_protein_LW858_02225_[Bacillus_cereus]                        | CPTF_Ni         | 656033.6667 | 113142.6934 | 17.2464767  |
| UIJ67136.1 | hypothetical_protein_LW858_02225_[Bacillus_cereus]                        | CPTF_U          | 331106.3333 | 287754.3343 | 86.90692545 |
| UIJ67136.1 | hypothetical_protein_LW858_02225_[Bacillus_cereus]                        | CPTF_metals_mix | 230485.3333 | 206313.2578 | 89.51253202 |
| UIJ67136.1 | hypothetical_protein_LW858_02225_[Bacillus_cereus]                        | CPTF_zcontrol   | 363629.6667 | 315184.8628 | 86.67743359 |
| UIJ67137.1 | LCP_family_protein_[Bacillus_cereus]                                      | CPTF_Al         | 12905.16667 | 22352.40435 | 173.2050808 |
| UIJ67137.1 | LCP_family_protein_[Bacillus_cereus]                                      | CPTF_Cd         | 138681.0333 | 173878.3335 | 125.3800388 |
| UIJ67137.1 | LCP_family_protein_[Bacillus_cereus]                                      | CPTF_Co         | 183214.0667 | 87969.42253 | 48.01455703 |
| UIJ67137.1 | LCP_family_protein_[Bacillus_cereus]                                      | CPTF_Cu         | 153966.6333 | 182221.5457 | 118.3513218 |
| UIJ67137.1 | LCP_family_protein_[Bacillus_cereus]                                      | CPTF_Fe         | 181181.1667 | 166009.6397 | 91.62632231 |
| UIJ67137.1 | LCP_family_protein_[Bacillus_cereus]                                      | CPTF_Mn         | 264699.7667 | 125489.1567 | 47.40811007 |
| UIJ67137.1 | LCP_family_protein_[Bacillus_cereus]                                      | CPTF_Ni         | 199082.9667 | 158460.6669 | 79.59529113 |
| UIJ67137.1 | LCP_family_protein_[Bacillus_cereus]                                      | CPTF_U          | 30036.36667 | 52024.51314 | 173.2050808 |
| UIJ67137.1 | LCP_family_protein_[Bacillus_cereus]                                      | CPTF_metals_mix | 24003.26667 | 41574.87741 | 173.2050808 |
| UIJ67137.1 | LCP_family_protein_[Bacillus_cereus]                                      | CPTF_zcontrol   | 172649.3667 | 153704.2287 | 89.02681294 |
| UIJ67203.1 | NADP-dependent_glyceraldehyde-3-phosphate_dehydrogenase_[Bacillus_cereus] | CPTF_Al         | 2301403.433 | 395284.16   | 17.17578736 |
| UIJ67203.1 | NADP-dependent_glyceraldehyde-3-phosphate_dehydrogenase_[Bacillus_cereus] | CPTF_Cd         | 2711632.6   | 26646.96887 | 0.982690976 |
| UIJ67203.1 | NADP-dependent_glyceraldehyde-3-phosphate_dehydrogenase_[Bacillus_cereus] | CPTF_Co         | 2191085.833 | 240264.0934 | 10.9655263  |

|            |                                                                           |                 |             |             |              |
|------------|---------------------------------------------------------------------------|-----------------|-------------|-------------|--------------|
| UIJ67203.1 | NADP-dependent_glyceraldehyde-3-phosphate_dehydrogenase_[Bacillus_cereus] | CPTF_Cu         | 2445052.667 | 312095.9906 | 12.76438724  |
| UIJ67203.1 | NADP-dependent_glyceraldehyde-3-phosphate_dehydrogenase_[Bacillus_cereus] | CPTF_Fe         | 2031315.1   | 384970.4323 | 18.95178312  |
| UIJ67203.1 | NADP-dependent_glyceraldehyde-3-phosphate_dehydrogenase_[Bacillus_cereus] | CPTF_Mn         | 1655161.8   | 525109.8042 | 31.72558745  |
| UIJ67203.1 | NADP-dependent_glyceraldehyde-3-phosphate_dehydrogenase_[Bacillus_cereus] | CPTF_Ni         | 1476506.967 | 137219.0219 | 9.293489637  |
| UIJ67203.1 | NADP-dependent_glyceraldehyde-3-phosphate_dehydrogenase_[Bacillus_cereus] | CPTF_U          | 1552257.233 | 82666.60524 | 5.325573846  |
| UIJ67203.1 | NADP-dependent_glyceraldehyde-3-phosphate_dehydrogenase_[Bacillus_cereus] | CPTF_metals_mix | 5051964.4   | 560465.2911 | 11.09400714  |
| UIJ67203.1 | NADP-dependent_glyceraldehyde-3-phosphate_dehydrogenase_[Bacillus_cereus] | CPTF_zcontrol   | 1735753.1   | 177331.8459 | 10.2164211   |
| UIJ67206.1 | amino_acid_ABC_transporter_substrate-binding_protein_[Bacillus_cereus]    | CPTF_Al         | 2791574.733 | 146792.1154 | 5.258398197  |
| UIJ67206.1 | amino_acid_ABC_transporter_substrate-binding_protein_[Bacillus_cereus]    | CPTF_Cd         | 3176401     | 495869.3167 | 15.61104271  |
| UIJ67206.1 | amino_acid_ABC_transporter_substrate-binding_protein_[Bacillus_cereus]    | CPTF_Co         | 3047099.7   | 92040.54935 | 3.020595268  |
| UIJ67206.1 | amino_acid_ABC_transporter_substrate-binding_protein_[Bacillus_cereus]    | CPTF_Cu         | 3333819.733 | 8006.129703 | 0.240148849  |
| UIJ67206.1 | amino_acid_ABC_transporter_substrate-binding_protein_[Bacillus_cereus]    | CPTF_Fe         | 2510537.267 | 161175.9019 | 6.419976473  |
| UIJ67206.1 | amino_acid_ABC_transporter_substrate-binding_protein_[Bacillus_cereus]    | CPTF_Mn         | 2618088.167 | 77906.75067 | 2.975711501  |
| UIJ67206.1 | amino_acid_ABC_transporter_substrate-binding_protein_[Bacillus_cereus]    | CPTF_Ni         | 2789053.267 | 107905.9949 | 3.86825936   |
| UIJ67206.1 | amino_acid_ABC_transporter_substrate-binding_protein_[Bacillus_cereus]    | CPTF_U          | 2238372.7   | 583158.2618 | 26.05277762  |
| UIJ67206.1 | amino_acid_ABC_transporter_substrate-binding_protein_[Bacillus_cereus]    | CPTF_metals_mix | 4060513.967 | 331555.7875 | 8.16536503   |
| UIJ67206.1 | amino_acid_ABC_transporter_substrate-binding_protein_[Bacillus_cereus]    | CPTF_zcontrol   | 2798221.8   | 126548.4221 | 4.522458587  |
| UIJ67212.1 | YlbF/YmcA_family_competence_regulator_[Bacillus_cereus]                   | CPTF_Al         | 3849891.167 | 140408.8525 | 3.647086278  |
| UIJ67212.1 | YlbF/YmcA_family_competence_regulator_[Bacillus_cereus]                   | CPTF_Cd         | 4039282.233 | 48874.19132 | 1.209972181  |
| UIJ67212.1 | YlbF/YmcA_family_competence_regulator_[Bacillus_cereus]                   | CPTF_Co         | 3611094.333 | 370478.8739 | 10.25946264  |
| UIJ67212.1 | YlbF/YmcA_family_competence_regulator_[Bacillus_cereus]                   | CPTF_Cu         | 3609830.667 | 268302.0692 | 7.432538919  |
| UIJ67212.1 | YlbF/YmcA_family_competence_regulator_[Bacillus_cereus]                   | CPTF_Fe         | 4002496.667 | 362886.3709 | 9.066500264  |
| UIJ67212.1 | YlbF/YmcA_family_competence_regulator_[Bacillus_cereus]                   | CPTF_Mn         | 4172487.7   | 133082.8628 | 3.189532777  |
| UIJ67212.1 | YlbF/YmcA_family_competence_regulator_[Bacillus_cereus]                   | CPTF_Ni         | 2377320.7   | 1627043.552 | 68.44022145  |
| UIJ67212.1 | YlbF/YmcA_family_competence_regulator_[Bacillus_cereus]                   | CPTF_U          | 3974433.367 | 183277.7636 | 4.611418703  |
| UIJ67212.1 | YlbF/YmcA_family_competence_regulator_[Bacillus_cereus]                   | CPTF_metals_mix | 3923245.333 | 62673.95977 | 1.597502946  |
| UIJ67212.1 | YlbF/YmcA_family_competence_regulator_[Bacillus_cereus]                   | CPTF_zcontrol   | 4300609.733 | 282807.3334 | 6.575982265  |
| UIJ67220.1 | tetratricopeptide_repeat_protein_[Bacillus_cereus]                        | CPTF_Al         | 7898218.767 | 920694.6644 | 11.65699117  |
| UIJ67220.1 | tetratricopeptide_repeat_protein_[Bacillus_cereus]                        | CPTF_Cd         | 7139312.133 | 2068980.486 | 28.98010968  |
| UIJ67220.1 | tetratricopeptide_repeat_protein_[Bacillus_cereus]                        | CPTF_Co         | 8837551.1   | 975983.4228 | 11.04359581  |
| UIJ67220.1 | tetratricopeptide_repeat_protein_[Bacillus_cereus]                        | CPTF_Cu         | 8524106.3   | 233342.6192 | 2.737443797  |
| UIJ67220.1 | tetratricopeptide_repeat_protein_[Bacillus_cereus]                        | CPTF_Fe         | 6235651.667 | 1146066.96  | 18.37926525  |
| UIJ67220.1 | tetratricopeptide_repeat_protein_[Bacillus_cereus]                        | CPTF_Mn         | 6138460.233 | 1121514.757 | 18.27029441  |
| UIJ67220.1 | tetratricopeptide_repeat_protein_[Bacillus_cereus]                        | CPTF_Ni         | 6202945.933 | 2197717.457 | 35.43022107  |
| UIJ67220.1 | tetratricopeptide_repeat_protein_[Bacillus_cereus]                        | CPTF_U          | 5028654.5   | 302068.9984 | 6.006954712  |
| UIJ67220.1 | tetratricopeptide_repeat_protein_[Bacillus_cereus]                        | CPTF_metals_mix | 9972504.3   | 543756.4944 | 5.452557132  |
| UIJ67220.1 | tetratricopeptide_repeat_protein_[Bacillus_cereus]                        | CPTF_zcontrol   | 7252727.5   | 2137376.057 | 29.46996225  |
| UIJ67228.1 | S-layer_homology_domain-containing_protein_[Bacillus_cereus]              | CPTF_Al         | 0           | 0           | 0            |
| UIJ67228.1 | S-layer_homology_domain-containing_protein_[Bacillus_cereus]              | CPTF_Cd         | 0           | 0           | 0            |
| UIJ67228.1 | S-layer_homology_domain-containing_protein_[Bacillus_cereus]              | CPTF_Co         | 0           | 0           | 0            |
| UIJ67228.1 | S-layer_homology_domain-containing_protein_[Bacillus_cereus]              | CPTF_Cu         | 0           | 0           | 0            |
| UIJ67228.1 | S-layer_homology_domain-containing_protein_[Bacillus_cereus]              | CPTF_Fe         | 0           | 0           | 0            |
| UIJ67228.1 | S-layer_homology_domain-containing_protein_[Bacillus_cereus]              | CPTF_Mn         | 0           | 0           | 0            |
| UIJ67228.1 | S-layer_homology_domain-containing_protein_[Bacillus_cereus]              | CPTF_Ni         | 0           | 0           | 0            |
| UIJ67228.1 | S-layer_homology_domain-containing_protein_[Bacillus_cereus]              | CPTF_U          | 0           | 0           | 0            |
| UIJ67228.1 | S-layer_homology_domain-containing_protein_[Bacillus_cereus]              | CPTF_metals_mix | 10522.13333 | 18224.86954 | 173.2050808  |
| UIJ67228.1 | S-layer_homology_domain-containing_protein_[Bacillus_cereus]              | CPTF_zcontrol   | 0           | 0           | 0            |
| UIJ67230.1 | fatty_acid--CoA_ligase_[Bacillus_cereus]                                  | CPTF_Al         | 101866.2333 | 29900.60614 | 29.35281414  |
| UIJ67230.1 | fatty_acid--CoA_ligase_[Bacillus_cereus]                                  | CPTF_Cd         | 178682.2    | 63642.41103 | 35.61765583  |
| UIJ67230.1 | fatty_acid--CoA_ligase_[Bacillus_cereus]                                  | CPTF_Co         | 132147.8667 | 41528.87528 | 31.426066561 |
| UIJ67230.1 | fatty_acid--CoA_ligase_[Bacillus_cereus]                                  | CPTF_Cu         | 79764.96667 | 50796.45846 | 63.68266744  |
| UIJ67230.1 | fatty_acid--CoA_ligase_[Bacillus_cereus]                                  | CPTF_Fe         | 155675.0333 | 30399.20364 | 19.5273468   |
| UIJ67230.1 | fatty_acid--CoA_ligase_[Bacillus_cereus]                                  | CPTF_Mn         | 112264.8667 | 95895.21492 | 85.4187225   |
| UIJ67230.1 | fatty_acid--CoA_ligase_[Bacillus_cereus]                                  | CPTF_Ni         | 25311.83333 | 22969.85019 | 90.74747721  |
| UIJ67230.1 | fatty_acid--CoA_ligase_[Bacillus_cereus]                                  | CPTF_U          | 85865.83333 | 74667.47205 | 86.95830362  |
| UIJ67230.1 | fatty_acid--CoA_ligase_[Bacillus_cereus]                                  | CPTF_metals_mix | 97551.06667 | 12802.84051 | 13.12424451  |
| UIJ67230.1 | fatty_acid--CoA_ligase_[Bacillus_cereus]                                  | CPTF_zcontrol   | 41602.73333 | 40803.20038 | 98.07817205  |
| UIJ67238.1 | enoyl-CoA_hydratase_[Bacillus_cereus]                                     | CPTF_Al         | 756261      | 102060.9924 | 13.49547211  |
| UIJ67238.1 | enoyl-CoA_hydratase_[Bacillus_cereus]                                     | CPTF_Cd         | 1049535.333 | 121796.3818 | 11.60479099  |
| UIJ67238.1 | enoyl-CoA_hydratase_[Bacillus_cereus]                                     | CPTF_Co         | 855070.6667 | 164188.861  | 19.20178851  |
| UIJ67238.1 | enoyl-CoA_hydratase_[Bacillus_cereus]                                     | CPTF_Cu         | 768287.3333 | 87655.38645 | 11.40919323  |

|            |                                                             |                 |             |             |             |
|------------|-------------------------------------------------------------|-----------------|-------------|-------------|-------------|
| UIJ67238.1 | enoyl-CoA_hydratase_[Bacillus_cereus]                       | CPTF_Fe         | 768293.6667 | 149602.9091 | 19.47209975 |
| UIJ67238.1 | enoyl-CoA_hydratase_[Bacillus_cereus]                       | CPTF_Mn         | 877583.3333 | 73372.2745  | 8.360718773 |
| UIJ67238.1 | enoyl-CoA_hydratase_[Bacillus_cereus]                       | CPTF_Ni         | 626437.0667 | 226176.5206 | 36.10522631 |
| UIJ67238.1 | enoyl-CoA_hydratase_[Bacillus_cereus]                       | CPTF_U          | 543767.3333 | 110222.6449 | 20.27018509 |
| UIJ67238.1 | enoyl-CoA_hydratase_[Bacillus_cereus]                       | CPTF_metals_mix | 778629.3333 | 105106.754  | 13.4989461  |
| UIJ67238.1 | enoyl-CoA_hydratase_[Bacillus_cereus]                       | CPTF_zcontrol   | 464204.6333 | 124394.3235 | 26.79730329 |
| UIJ67242.1 | M42_family_metallopeptidase_[Bacillus_cereus]               | CPTF_Al         | 1426863     | 141979.8559 | 9.950489706 |
| UIJ67242.1 | M42_family_metallopeptidase_[Bacillus_cereus]               | CPTF_Cd         | 838937.3333 | 465295.8197 | 55.46252398 |
| UIJ67242.1 | M42_family_metallopeptidase_[Bacillus_cereus]               | CPTF_Co         | 1174322     | 518986.5146 | 44.19456628 |
| UIJ67242.1 | M42_family_metallopeptidase_[Bacillus_cereus]               | CPTF_Cu         | 1579757.667 | 152986.3936 | 9.684168451 |
| UIJ67242.1 | M42_family_metallopeptidase_[Bacillus_cereus]               | CPTF_Fe         | 1450363     | 279923.2721 | 19.30022154 |
| UIJ67242.1 | M42_family_metallopeptidase_[Bacillus_cereus]               | CPTF_Mn         | 1281275.333 | 310226.3706 | 24.21231117 |
| UIJ67242.1 | M42_family_metallopeptidase_[Bacillus_cereus]               | CPTF_Ni         | 1168901.233 | 661077.8642 | 56.55549377 |
| UIJ67242.1 | M42_family_metallopeptidase_[Bacillus_cereus]               | CPTF_U          | 1155092.667 | 742745.2688 | 64.30179069 |
| UIJ67242.1 | M42_family_metallopeptidase_[Bacillus_cereus]               | CPTF_metals_mix | 510586.6667 | 384005.9813 | 75.20877578 |
| UIJ67242.1 | M42_family_metallopeptidase_[Bacillus_cereus]               | CPTF_zcontrol   | 924005      | 644904.3276 | 69.79446297 |
| UIJ67247.1 | ABC_transporter_substrate-binding_protein_[Bacillus_cereus] | CPTF_Al         | 2748614     | 250836.6717 | 9.125932986 |
| UIJ67247.1 | ABC_transporter_substrate-binding_protein_[Bacillus_cereus] | CPTF_Cd         | 2481475     | 417428.3527 | 16.82178353 |
| UIJ67247.1 | ABC_transporter_substrate-binding_protein_[Bacillus_cereus] | CPTF_Co         | 2861078     | 273734.0907 | 9.567515836 |
| UIJ67247.1 | ABC_transporter_substrate-binding_protein_[Bacillus_cereus] | CPTF_Cu         | 2854318.067 | 144852.2959 | 5.074847741 |
| UIJ67247.1 | ABC_transporter_substrate-binding_protein_[Bacillus_cereus] | CPTF_Fe         | 2466705     | 257512.8916 | 10.43954958 |
| UIJ67247.1 | ABC_transporter_substrate-binding_protein_[Bacillus_cereus] | CPTF_Mn         | 2359667     | 500444.3069 | 21.20825976 |
| UIJ67247.1 | ABC_transporter_substrate-binding_protein_[Bacillus_cereus] | CPTF_Ni         | 2594335.5   | 346910.3357 | 13.37183782 |
| UIJ67247.1 | ABC_transporter_substrate-binding_protein_[Bacillus_cereus] | CPTF_U          | 2416358.033 | 248995.9661 | 10.30459736 |
| UIJ67247.1 | ABC_transporter_substrate-binding_protein_[Bacillus_cereus] | CPTF_metals_mix | 2275293.8   | 185173.6391 | 8.138449597 |
| UIJ67247.1 | ABC_transporter_substrate-binding_protein_[Bacillus_cereus] | CPTF_zcontrol   | 2472255.667 | 232296.6072 | 9.396140144 |
| UIJ67250.1 | ABC_transporter_ATP-binding_protein_[Bacillus_cereus]       | CPTF_Al         | 0           | 0           | 0           |
| UIJ67250.1 | ABC_transporter_ATP-binding_protein_[Bacillus_cereus]       | CPTF_Cd         | 44327.66667 | 40236.65698 | 90.77097895 |
| UIJ67250.1 | ABC_transporter_ATP-binding_protein_[Bacillus_cereus]       | CPTF_Co         | 0           | 0           | 0           |
| UIJ67250.1 | ABC_transporter_ATP-binding_protein_[Bacillus_cereus]       | CPTF_Cu         | 7183.733333 | 12442.59112 | 173.2050808 |
| UIJ67250.1 | ABC_transporter_ATP-binding_protein_[Bacillus_cereus]       | CPTF_Fe         | 0           | 0           | 0           |
| UIJ67250.1 | ABC_transporter_ATP-binding_protein_[Bacillus_cereus]       | CPTF_Mn         | 20243.53333 | 35062.82826 | 173.2050808 |
| UIJ67250.1 | ABC_transporter_ATP-binding_protein_[Bacillus_cereus]       | CPTF_Ni         | 24254.76667 | 42010.48819 | 173.2050808 |
| UIJ67250.1 | ABC_transporter_ATP-binding_protein_[Bacillus_cereus]       | CPTF_U          | 13344.8     | 23113.87162 | 173.2050808 |
| UIJ67250.1 | ABC_transporter_ATP-binding_protein_[Bacillus_cereus]       | CPTF_metals_mix | 0           | 0           | 0           |
| UIJ67250.1 | ABC_transporter_ATP-binding_protein_[Bacillus_cereus]       | CPTF_zcontrol   | 0           | 0           | 0           |
| UIJ67251.1 | ABC_transporter_ATP-binding_protein_[Bacillus_cereus]       | CPTF_Al         | 32861.33333 | 36937.90364 | 112.405371  |
| UIJ67251.1 | ABC_transporter_ATP-binding_protein_[Bacillus_cereus]       | CPTF_Cd         | 20806.53333 | 18165.68986 | 87.30762385 |
| UIJ67251.1 | ABC_transporter_ATP-binding_protein_[Bacillus_cereus]       | CPTF_Co         | 19500.66667 | 17908.49792 | 91.83531121 |
| UIJ67251.1 | ABC_transporter_ATP-binding_protein_[Bacillus_cereus]       | CPTF_Cu         | 39828.33333 | 14328.23676 | 35.97498455 |
| UIJ67251.1 | ABC_transporter_ATP-binding_protein_[Bacillus_cereus]       | CPTF_Fe         | 22898.76667 | 39661.8273  | 173.2050808 |
| UIJ67251.1 | ABC_transporter_ATP-binding_protein_[Bacillus_cereus]       | CPTF_Mn         | 18956.1     | 32832.92831 | 173.2050808 |
| UIJ67251.1 | ABC_transporter_ATP-binding_protein_[Bacillus_cereus]       | CPTF_Ni         | 32743.66667 | 28374.58705 | 86.6567185  |
| UIJ67251.1 | ABC_transporter_ATP-binding_protein_[Bacillus_cereus]       | CPTF_U          | 18320       | 31731.17079 | 173.2050808 |
| UIJ67251.1 | ABC_transporter_ATP-binding_protein_[Bacillus_cereus]       | CPTF_metals_mix | 32520.96667 | 9499.468963 | 29.21029089 |
| UIJ67251.1 | ABC_transporter_ATP-binding_protein_[Bacillus_cereus]       | CPTF_zcontrol   | 41678.33333 | 25326.80577 | 60.767319   |
| UIJ67285.1 | DNA_(cytosine-5)-methyltransferase_[Bacillus_cereus]        | CPTF_Al         | 0           | 0           | 0           |
| UIJ67285.1 | DNA_(cytosine-5)-methyltransferase_[Bacillus_cereus]        | CPTF_Cd         | 10619.86667 | 18394.14864 | 173.2050808 |
| UIJ67285.1 | DNA_(cytosine-5)-methyltransferase_[Bacillus_cereus]        | CPTF_Co         | 17995.66667 | 31169.40898 | 173.2050808 |
| UIJ67285.1 | DNA_(cytosine-5)-methyltransferase_[Bacillus_cereus]        | CPTF_Cu         | 0           | 0           | 0           |
| UIJ67285.1 | DNA_(cytosine-5)-methyltransferase_[Bacillus_cereus]        | CPTF_Fe         | 0           | 0           | 0           |
| UIJ67285.1 | DNA_(cytosine-5)-methyltransferase_[Bacillus_cereus]        | CPTF_Mn         | 0           | 0           | 0           |
| UIJ67285.1 | DNA_(cytosine-5)-methyltransferase_[Bacillus_cereus]        | CPTF_Ni         | 0           | 0           | 0           |
| UIJ67285.1 | DNA_(cytosine-5)-methyltransferase_[Bacillus_cereus]        | CPTF_U          | 24166.06667 | 41856.85529 | 173.2050808 |
| UIJ67285.1 | DNA_(cytosine-5)-methyltransferase_[Bacillus_cereus]        | CPTF_metals_mix | 81776.03333 | 59245.55488 | 72.44855549 |
| UIJ67285.1 | DNA_(cytosine-5)-methyltransferase_[Bacillus_cereus]        | CPTF_zcontrol   | 0           | 0           | 0           |
| UIJ67292.1 | DUF262_domain-containing_protein_[Bacillus_cereus]          | CPTF_Al         | 517476.3333 | 138027.1317 | 26.67312934 |
| UIJ67292.1 | DUF262_domain-containing_protein_[Bacillus_cereus]          | CPTF_Cd         | 630288.6667 | 115104.1549 | 18.26213305 |
| UIJ67292.1 | DUF262_domain-containing_protein_[Bacillus_cereus]          | CPTF_Co         | 412544.1333 | 135996.622  | 32.96535109 |
| UIJ67292.1 | DUF262_domain-containing_protein_[Bacillus_cereus]          | CPTF_Cu         | 532230      | 31965.11267 | 6.005883297 |
| UIJ67292.1 | DUF262_domain-containing_protein_[Bacillus_cereus]          | CPTF_Fe         | 562122.3333 | 380811.7976 | 67.74535987 |



|            |                                                                 |                 |             |             |             |
|------------|-----------------------------------------------------------------|-----------------|-------------|-------------|-------------|
| UIJ67292.1 | DUF262_domain-containing_protein_[Bacillus_cereus]              | CPTF_Mn         | 452614.6667 | 70791.08476 | 15.64047521 |
| UIJ67292.1 | DUF262_domain-containing_protein_[Bacillus_cereus]              | CPTF_Ni         | 604854.2    | 231361.609  | 38.25080639 |
| UIJ67292.1 | DUF262_domain-containing_protein_[Bacillus_cereus]              | CPTF_U          | 599575.4333 | 284055.2508 | 47.37606563 |
| UIJ67292.1 | DUF262_domain-containing_protein_[Bacillus_cereus]              | CPTF_metals_mix | 863721.4    | 43786.33877 | 5.069497962 |
| UIJ67292.1 | DUF262_domain-containing_protein_[Bacillus_cereus]              | CPTF_zcontrol   | 549202.0667 | 85915.41696 | 15.64368056 |
| UIJ67293.1 | HNH_endonuclease_[Bacillus_cereus]                              | CPTF_Al         | 10707.83333 | 18546.51137 | 173.2050808 |
| UIJ67293.1 | HNH_endonuclease_[Bacillus_cereus]                              | CPTF_Cd         | 0           | 0           | 0           |
| UIJ67293.1 | HNH_endonuclease_[Bacillus_cereus]                              | CPTF_Co         | 60060.73333 | 65225.42166 | 108.5991097 |
| UIJ67293.1 | HNH_endonuclease_[Bacillus_cereus]                              | CPTF_Cu         | 15901.23333 | 27541.74404 | 173.2050808 |
| UIJ67293.1 | HNH_endonuclease_[Bacillus_cereus]                              | CPTF_Fe         | 0           | 0           | 0           |
| UIJ67293.1 | HNH_endonuclease_[Bacillus_cereus]                              | CPTF_Mn         | 8258.4      | 14303.96839 | 173.2050808 |
| UIJ67293.1 | HNH_endonuclease_[Bacillus_cereus]                              | CPTF_Ni         | 15585.26667 | 26994.47372 | 173.2050808 |
| UIJ67293.1 | HNH_endonuclease_[Bacillus_cereus]                              | CPTF_U          | 9140.833333 | 15832.38776 | 173.2050808 |
| UIJ67293.1 | HNH_endonuclease_[Bacillus_cereus]                              | CPTF_metals_mix | 268087      | 134351.4458 | 50.11486786 |
| UIJ67293.1 | HNH_endonuclease_[Bacillus_cereus]                              | CPTF_zcontrol   | 0           | 0           | 0           |
| UIJ67318.1 | dihydroxyacetone_kinase_subunit_DhaK_[Bacillus_cereus]          | CPTF_Al         | 0           | 0           | 0           |
| UIJ67318.1 | dihydroxyacetone_kinase_subunit_DhaK_[Bacillus_cereus]          | CPTF_Cd         | 18990.83333 | 17338.19466 | 91.29770325 |
| UIJ67318.1 | dihydroxyacetone_kinase_subunit_DhaK_[Bacillus_cereus]          | CPTF_Co         | 0           | 0           | 0           |
| UIJ67318.1 | dihydroxyacetone_kinase_subunit_DhaK_[Bacillus_cereus]          | CPTF_Cu         | 0           | 0           | 0           |
| UIJ67318.1 | dihydroxyacetone_kinase_subunit_DhaK_[Bacillus_cereus]          | CPTF_Fe         | 0           | 0           | 0           |
| UIJ67318.1 | dihydroxyacetone_kinase_subunit_DhaK_[Bacillus_cereus]          | CPTF_Mn         | 19712.76667 | 34143.51342 | 173.2050808 |
| UIJ67318.1 | dihydroxyacetone_kinase_subunit_DhaK_[Bacillus_cereus]          | CPTF_Ni         | 0           | 0           | 0           |
| UIJ67318.1 | dihydroxyacetone_kinase_subunit_DhaK_[Bacillus_cereus]          | CPTF_U          | 0           | 0           | 0           |
| UIJ67318.1 | dihydroxyacetone_kinase_subunit_DhaK_[Bacillus_cereus]          | CPTF_metals_mix | 70836.26667 | 20679.33283 | 29.19314329 |
| UIJ67318.1 | dihydroxyacetone_kinase_subunit_DhaK_[Bacillus_cereus]          | CPTF_zcontrol   | 0           | 0           | 0           |
| UIJ67337.1 | heavy_metal-binding_domain-containing_protein_[Bacillus_cereus] | CPTF_Al         | 292985.1    | 150675.0628 | 51.42755137 |
| UIJ67337.1 | heavy_metal-binding_domain-containing_protein_[Bacillus_cereus] | CPTF_Cd         | 467113.9667 | 111296.3685 | 23.82638424 |
| UIJ67337.1 | heavy_metal-binding_domain-containing_protein_[Bacillus_cereus] | CPTF_Co         | 335244.0667 | 76223.35956 | 22.73667669 |
| UIJ67337.1 | heavy_metal-binding_domain-containing_protein_[Bacillus_cereus] | CPTF_Cu         | 486186.8333 | 200064.1533 | 41.14964445 |
| UIJ67337.1 | heavy_metal-binding_domain-containing_protein_[Bacillus_cereus] | CPTF_Fe         | 347811.6667 | 141785.4804 | 40.76501565 |
| UIJ67337.1 | heavy_metal-binding_domain-containing_protein_[Bacillus_cereus] | CPTF_Mn         | 371060.6667 | 38349.79588 | 10.33518218 |
| UIJ67337.1 | heavy_metal-binding_domain-containing_protein_[Bacillus_cereus] | CPTF_Ni         | 270584.9667 | 34633.68527 | 12.79956004 |
| UIJ67337.1 | heavy_metal-binding_domain-containing_protein_[Bacillus_cereus] | CPTF_U          | 431839.5    | 87608.18788 | 20.28721038 |
| UIJ67337.1 | heavy_metal-binding_domain-containing_protein_[Bacillus_cereus] | CPTF_metals_mix | 2280059.667 | 341316.1216 | 14.96961359 |
| UIJ67337.1 | heavy_metal-binding_domain-containing_protein_[Bacillus_cereus] | CPTF_zcontrol   | 98179.6     | 30531.9783  | 31.09808789 |
| UIJ67340.1 | choloylglycine_hydrolase_[Bacillus_cereus]                      | CPTF_Al         | 705711.0667 | 82454.17749 | 11.68384363 |
| UIJ67340.1 | choloylglycine_hydrolase_[Bacillus_cereus]                      | CPTF_Cd         | 751582.8    | 114991.6997 | 15.29993763 |
| UIJ67340.1 | choloylglycine_hydrolase_[Bacillus_cereus]                      | CPTF_Co         | 656884.8    | 4762.102342 | 0.724952433 |
| UIJ67340.1 | choloylglycine_hydrolase_[Bacillus_cereus]                      | CPTF_Cu         | 636768.3    | 86410.18621 | 13.57011431 |
| UIJ67340.1 | choloylglycine_hydrolase_[Bacillus_cereus]                      | CPTF_Fe         | 617513.3333 | 65865.94705 | 10.66631982 |
| UIJ67340.1 | choloylglycine_hydrolase_[Bacillus_cereus]                      | CPTF_Mn         | 527764.6667 | 37059.08414 | 7.021895644 |
| UIJ67340.1 | choloylglycine_hydrolase_[Bacillus_cereus]                      | CPTF_Ni         | 538742.2667 | 45017.9596  | 8.356121727 |
| UIJ67340.1 | choloylglycine_hydrolase_[Bacillus_cereus]                      | CPTF_U          | 492945.3333 | 130854.7705 | 26.54549331 |
| UIJ67340.1 | choloylglycine_hydrolase_[Bacillus_cereus]                      | CPTF_metals_mix | 688611      | 14672.82757 | 2.130786115 |
| UIJ67340.1 | choloylglycine_hydrolase_[Bacillus_cereus]                      | CPTF_zcontrol   | 579019.7333 | 36844.65734 | 6.363281806 |
| UIJ67341.1 | YfjI_family_protein_[Bacillus_cereus]                           | CPTF_Al         | 1767559     | 503322.0524 | 28.47554466 |
| UIJ67341.1 | YfjI_family_protein_[Bacillus_cereus]                           | CPTF_Cd         | 2131684.667 | 246914.7283 | 11.58307944 |
| UIJ67341.1 | YfjI_family_protein_[Bacillus_cereus]                           | CPTF_Co         | 1862450.333 | 203063.7987 | 10.90304504 |
| UIJ67341.1 | YfjI_family_protein_[Bacillus_cereus]                           | CPTF_Cu         | 1896491.333 | 478902.7129 | 25.25203804 |
| UIJ67341.1 | YfjI_family_protein_[Bacillus_cereus]                           | CPTF_Fe         | 2049538.333 | 254979.1331 | 12.4408082  |
| UIJ67341.1 | YfjI_family_protein_[Bacillus_cereus]                           | CPTF_Mn         | 1619934.333 | 779875.8698 | 48.14243725 |
| UIJ67341.1 | YfjI_family_protein_[Bacillus_cereus]                           | CPTF_Ni         | 1151194     | 449147.213  | 39.01577084 |
| UIJ67341.1 | YfjI_family_protein_[Bacillus_cereus]                           | CPTF_U          | 977459      | 152237.6181 | 15.57483414 |
| UIJ67341.1 | YfjI_family_protein_[Bacillus_cereus]                           | CPTF_metals_mix | 2310589     | 156965.5958 | 6.793315288 |
| UIJ67341.1 | YfjI_family_protein_[Bacillus_cereus]                           | CPTF_zcontrol   | 1633870.333 | 90944.50841 | 5.566201097 |
| UIJ67343.1 | hypothetical_protein_LW858_03415_[Bacillus_cereus]              | CPTF_Al         | 0           | 0           | 0           |
| UIJ67343.1 | hypothetical_protein_LW858_03415_[Bacillus_cereus]              | CPTF_Cd         | 7732.766667 | 13393.54475 | 173.2050808 |
| UIJ67343.1 | hypothetical_protein_LW858_03415_[Bacillus_cereus]              | CPTF_Co         | 18643.4     | 18656.96476 | 100.0727591 |
| UIJ67343.1 | hypothetical_protein_LW858_03415_[Bacillus_cereus]              | CPTF_Cu         | 0           | 0           | 0           |
| UIJ67343.1 | hypothetical_protein_LW858_03415_[Bacillus_cereus]              | CPTF_Fe         | 0           | 0           | 0           |
| UIJ67343.1 | hypothetical_protein_LW858_03415_[Bacillus_cereus]              | CPTF_Mn         | 0           | 0           | 0           |

|            |                                                              |                 |             |             |             |
|------------|--------------------------------------------------------------|-----------------|-------------|-------------|-------------|
| UIJ67343.1 | hypothetical_protein_LW858_03415 [Bacillus cereus]           | CPTF_Ni         | 0           | 0           | 0           |
| UIJ67343.1 | hypothetical_protein_LW858_03415 [Bacillus cereus]           | CPTF_U          | 0           | 0           | 0           |
| UIJ67343.1 | hypothetical_protein_LW858_03415 [Bacillus cereus]           | CPTF_metals_mix | 244801      | 55102.04462 | 22.50891321 |
| UIJ67343.1 | hypothetical_protein_LW858_03415 [Bacillus cereus]           | CPTF_zcontrol   | 0           | 0           | 0           |
| UIJ67346.1 | 3'-5' exoribonuclease_YhaM [Bacillus cereus]                 | CPTF_Al         | 1601974.567 | 238839.1783 | 14.90904932 |
| UIJ67346.1 | 3'-5' exoribonuclease_YhaM [Bacillus cereus]                 | CPTF_Cd         | 1599569.633 | 555727.7501 | 34.74232935 |
| UIJ67346.1 | 3'-5' exoribonuclease_YhaM [Bacillus cereus]                 | CPTF_Co         | 1399295.433 | 349582.706  | 24.98276616 |
| UIJ67346.1 | 3'-5' exoribonuclease_YhaM [Bacillus cereus]                 | CPTF_Cu         | 1689775.233 | 197102.1833 | 11.66440243 |
| UIJ67346.1 | 3'-5' exoribonuclease_YhaM [Bacillus cereus]                 | CPTF_Fe         | 1470798.3   | 257690.1738 | 17.52042913 |
| UIJ67346.1 | 3'-5' exoribonuclease_YhaM [Bacillus cereus]                 | CPTF_Mn         | 1549295.267 | 414950.8771 | 26.78320176 |
| UIJ67346.1 | 3'-5' exoribonuclease_YhaM [Bacillus cereus]                 | CPTF_Ni         | 1460734.667 | 394371.632  | 26.99817024 |
| UIJ67346.1 | 3'-5' exoribonuclease_YhaM [Bacillus cereus]                 | CPTF_U          | 1205345     | 135321.5828 | 11.22679256 |
| UIJ67346.1 | 3'-5' exoribonuclease_YhaM [Bacillus cereus]                 | CPTF_metals_mix | 1330151.833 | 376787.8738 | 28.32668154 |
| UIJ67346.1 | 3'-5' exoribonuclease_YhaM [Bacillus cereus]                 | CPTF_zcontrol   | 1541223.1   | 282292.9929 | 18.31616674 |
| UIJ67349.1 | helix-turn-helix_domain-containing_protein [Bacillus cereus] | CPTF_Al         | 36705.9     | 31981.9274  | 87.13020903 |
| UIJ67349.1 | helix-turn-helix_domain-containing_protein [Bacillus cereus] | CPTF_Cd         | 40438.96667 | 36142.94228 | 89.37652283 |
| UIJ67349.1 | helix-turn-helix_domain-containing_protein [Bacillus cereus] | CPTF_Co         | 21110       | 36563.59255 | 173.2050808 |
| UIJ67349.1 | helix-turn-helix_domain-containing_protein [Bacillus cereus] | CPTF_Cu         | 18580.5     | 32182.37003 | 173.2050808 |
| UIJ67349.1 | helix-turn-helix_domain-containing_protein [Bacillus cereus] | CPTF_Fe         | 64444.2     | 68017.86554 | 105.5453641 |
| UIJ67349.1 | helix-turn-helix_domain-containing_protein [Bacillus cereus] | CPTF_Mn         | 18380.76667 | 31836.42175 | 173.2050808 |
| UIJ67349.1 | helix-turn-helix_domain-containing_protein [Bacillus cereus] | CPTF_Ni         | 24681.36667 | 42749.38107 | 173.2050808 |
| UIJ67349.1 | helix-turn-helix_domain-containing_protein [Bacillus cereus] | CPTF_U          | 9249.26667  | 16020.1998  | 173.2050808 |
| UIJ67349.1 | helix-turn-helix_domain-containing_protein [Bacillus cereus] | CPTF_metals_mix | 70201.23333 | 38940.87157 | 55.47035248 |
| UIJ67349.1 | helix-turn-helix_domain-containing_protein [Bacillus cereus] | CPTF_zcontrol   | 0           | 0           | 0           |
| UIJ67376.1 | ring-cleaving_dioxygenase [Bacillus cereus]                  | CPTF_Al         | 19126.73333 | 18801.36732 | 98.29889397 |
| UIJ67376.1 | ring-cleaving_dioxygenase [Bacillus cereus]                  | CPTF_Cd         | 71828.23333 | 8411.510023 | 11.71059016 |
| UIJ67376.1 | ring-cleaving_dioxygenase [Bacillus cereus]                  | CPTF_Co         | 22005.26667 | 3447.707804 | 15.66764837 |
| UIJ67376.1 | ring-cleaving_dioxygenase [Bacillus cereus]                  | CPTF_Cu         | 27846.6     | 24119.4542  | 86.61543673 |
| UIJ67376.1 | ring-cleaving_dioxygenase [Bacillus cereus]                  | CPTF_Fe         | 52932.86667 | 34360.21358 | 64.91281456 |
| UIJ67376.1 | ring-cleaving_dioxygenase [Bacillus cereus]                  | CPTF_Mn         | 35440.73333 | 35192.09254 | 99.29843216 |
| UIJ67376.1 | ring-cleaving_dioxygenase [Bacillus cereus]                  | CPTF_Ni         | 18522.76667 | 17162.59331 | 92.65675924 |
| UIJ67376.1 | ring-cleaving_dioxygenase [Bacillus cereus]                  | CPTF_U          | 48668.83333 | 6743.146558 | 13.85516376 |
| UIJ67376.1 | ring-cleaving_dioxygenase [Bacillus cereus]                  | CPTF_metals_mix | 51614.33333 | 27505.10096 | 53.28965654 |
| UIJ67376.1 | ring-cleaving_dioxygenase [Bacillus cereus]                  | CPTF_zcontrol   | 20068.33333 | 19133.57019 | 95.34209879 |
| UIJ67377.1 | ring-cleaving_dioxygenase [Bacillus cereus]                  | CPTF_Al         | 19785.43333 | 19704.94924 | 99.59321543 |
| UIJ67377.1 | ring-cleaving_dioxygenase [Bacillus cereus]                  | CPTF_Cd         | 27148.4     | 26238.95782 | 96.65010763 |
| UIJ67377.1 | ring-cleaving_dioxygenase [Bacillus cereus]                  | CPTF_Co         | 0           | 0           | 0           |
| UIJ67377.1 | ring-cleaving_dioxygenase [Bacillus cereus]                  | CPTF_Cu         | 51395.8     | 18561.2175  | 36.11426907 |
| UIJ67377.1 | ring-cleaving_dioxygenase [Bacillus cereus]                  | CPTF_Fe         | 14993.5     | 25969.50378 | 173.2050808 |
| UIJ67377.1 | ring-cleaving_dioxygenase [Bacillus cereus]                  | CPTF_Mn         | 20736.3     | 20278.04321 | 97.79007445 |
| UIJ67377.1 | ring-cleaving_dioxygenase [Bacillus cereus]                  | CPTF_Ni         | 13999.03333 | 24247.03699 | 173.2050808 |
| UIJ67377.1 | ring-cleaving_dioxygenase [Bacillus cereus]                  | CPTF_U          | 10202.1     | 17670.55554 | 173.2050808 |
| UIJ67377.1 | ring-cleaving_dioxygenase [Bacillus cereus]                  | CPTF_metals_mix | 20187.1     | 6183.048919 | 30.62871298 |
| UIJ67377.1 | ring-cleaving_dioxygenase [Bacillus cereus]                  | CPTF_zcontrol   | 10512.96667 | 18208.9924  | 173.2050808 |
| UIJ67383.1 | glycerol_kinase_GlpK [Bacillus cereus]                       | CPTF_Al         | 110391.7667 | 51064.26905 | 46.25731664 |
| UIJ67383.1 | glycerol_kinase_GlpK [Bacillus cereus]                       | CPTF_Cd         | 163267.6667 | 53902.24723 | 33.01464909 |
| UIJ67383.1 | glycerol_kinase_GlpK [Bacillus cereus]                       | CPTF_Co         | 127663.5333 | 26045.16164 | 20.40141062 |
| UIJ67383.1 | glycerol_kinase_GlpK [Bacillus cereus]                       | CPTF_Cu         | 176354      | 42909.41061 | 24.33140763 |
| UIJ67383.1 | glycerol_kinase_GlpK [Bacillus cereus]                       | CPTF_Fe         | 163569.8    | 60776.80654 | 37.15649621 |
| UIJ67383.1 | glycerol_kinase_GlpK [Bacillus cereus]                       | CPTF_Mn         | 89049.93333 | 35585.50013 | 39.96128778 |
| UIJ67383.1 | glycerol_kinase_GlpK [Bacillus cereus]                       | CPTF_Ni         | 152934.6667 | 9396.318499 | 6.144008225 |
| UIJ67383.1 | glycerol_kinase_GlpK [Bacillus cereus]                       | CPTF_U          | 82841.1     | 22825.56905 | 27.55343549 |
| UIJ67383.1 | glycerol_kinase_GlpK [Bacillus cereus]                       | CPTF_metals_mix | 224871.3333 | 13664.25081 | 6.076475206 |
| UIJ67383.1 | glycerol_kinase_GlpK [Bacillus cereus]                       | CPTF_zcontrol   | 95538       | 36263.57524 | 37.95722669 |
| UIJ67386.1 | UvrD-helicase_domain-containing_protein [Bacillus cereus]    | CPTF_Al         | 120673.3333 | 107190.6617 | 88.8271325  |
| UIJ67386.1 | UvrD-helicase_domain-containing_protein [Bacillus cereus]    | CPTF_Cd         | 0           | 0           | 0           |
| UIJ67386.1 | UvrD-helicase_domain-containing_protein [Bacillus cereus]    | CPTF_Co         | 0           | 0           | 0           |
| UIJ67386.1 | UvrD-helicase_domain-containing_protein [Bacillus cereus]    | CPTF_Cu         | 24205.06667 | 41924.40527 | 173.2050808 |
| UIJ67386.1 | UvrD-helicase_domain-containing_protein [Bacillus cereus]    | CPTF_Fe         | 0           | 0           | 0           |
| UIJ67386.1 | UvrD-helicase_domain-containing_protein [Bacillus cereus]    | CPTF_Mn         | 23922.4     | 41434.81224 | 173.2050808 |
| UIJ67386.1 | UvrD-helicase_domain-containing_protein [Bacillus cereus]    | CPTF_Ni         | 0           | 0           | 0           |

|            |                                                            |                 |             |             |             |
|------------|------------------------------------------------------------|-----------------|-------------|-------------|-------------|
| UIJ67386.1 | UvrD-helicase_domain-containing_protein_[Bacillus_cereus]  | CPTF_U          | 0           | 0           | 0           |
| UIJ67386.1 | UvrD-helicase_domain-containing_protein_[Bacillus_cereus]  | CPTF_metals_mix | 0           | 0           | 0           |
| UIJ67386.1 | UvrD-helicase_domain-containing_protein_[Bacillus_cereus]  | CPTF_zcontrol   | 0           | 0           | 0           |
| UIJ67388.1 | peptidylprolyl_isomerase_PrsA_[Bacillus_cereus]            | CPTF_Al         | 1554604.667 | 122221.6977 | 7.861915014 |
| UIJ67388.1 | peptidylprolyl_isomerase_PrsA_[Bacillus_cereus]            | CPTF_Cd         | 1634679     | 149440.0139 | 9.141856837 |
| UIJ67388.1 | peptidylprolyl_isomerase_PrsA_[Bacillus_cereus]            | CPTF_Co         | 1591064.667 | 225700.1654 | 14.18548033 |
| UIJ67388.1 | peptidylprolyl_isomerase_PrsA_[Bacillus_cereus]            | CPTF_Cu         | 1729999.4   | 261428.2141 | 15.1114627  |
| UIJ67388.1 | peptidylprolyl_isomerase_PrsA_[Bacillus_cereus]            | CPTF_Fe         | 1641568.833 | 132568.4517 | 8.075716897 |
| UIJ67388.1 | peptidylprolyl_isomerase_PrsA_[Bacillus_cereus]            | CPTF_Mn         | 1728061.567 | 105722.1586 | 6.117962498 |
| UIJ67388.1 | peptidylprolyl_isomerase_PrsA_[Bacillus_cereus]            | CPTF_Ni         | 1575449.033 | 233895.7899 | 14.84629366 |
| UIJ67388.1 | peptidylprolyl_isomerase_PrsA_[Bacillus_cereus]            | CPTF_U          | 1932523.033 | 143690.7888 | 7.435398511 |
| UIJ67388.1 | peptidylprolyl_isomerase_PrsA_[Bacillus_cereus]            | CPTF_metals_mix | 1842723.9   | 175768.5787 | 9.538519511 |
| UIJ67388.1 | peptidylprolyl_isomerase_PrsA_[Bacillus_cereus]            | CPTF_zcontrol   | 1921770.567 | 108214.3667 | 5.630972217 |
| UIJ67391.1 | HTH-type_transcriptional_regulator_Hpr_[Bacillus_cereus]   | CPTF_Al         | 1414910.667 | 202415.1589 | 14.3058614  |
| UIJ67391.1 | HTH-type_transcriptional_regulator_Hpr_[Bacillus_cereus]   | CPTF_Cd         | 1061926.267 | 58346.5232  | 5.494404287 |
| UIJ67391.1 | HTH-type_transcriptional_regulator_Hpr_[Bacillus_cereus]   | CPTF_Co         | 1465376.033 | 399694.8617 | 27.27592458 |
| UIJ67391.1 | HTH-type_transcriptional_regulator_Hpr_[Bacillus_cereus]   | CPTF_Cu         | 1395616.933 | 103108.6521 | 7.388033895 |
| UIJ67391.1 | HTH-type_transcriptional_regulator_Hpr_[Bacillus_cereus]   | CPTF_Fe         | 1293186.4   | 142651.893  | 11.03103876 |
| UIJ67391.1 | HTH-type_transcriptional_regulator_Hpr_[Bacillus_cereus]   | CPTF_Mn         | 1186455     | 109435.6746 | 9.22375266  |
| UIJ67391.1 | HTH-type_transcriptional_regulator_Hpr_[Bacillus_cereus]   | CPTF_Ni         | 1450460.133 | 64937.55129 | 4.477031102 |
| UIJ67391.1 | HTH-type_transcriptional_regulator_Hpr_[Bacillus_cereus]   | CPTF_U          | 1270319.067 | 212991.5755 | 16.76677782 |
| UIJ67391.1 | HTH-type_transcriptional_regulator_Hpr_[Bacillus_cereus]   | CPTF_metals_mix | 1292686.233 | 239103.3815 | 18.49662937 |
| UIJ67391.1 | HTH-type_transcriptional_regulator_Hpr_[Bacillus_cereus]   | CPTF_zcontrol   | 1328900.033 | 113403.8151 | 8.533660338 |
| UIJ67392.1 | YtxH_domain-containing_protein_[Bacillus_cereus]           | CPTF_Al         | 856308.7    | 598046.3534 | 69.84004173 |
| UIJ67392.1 | YtxH_domain-containing_protein_[Bacillus_cereus]           | CPTF_Cd         | 1493715.333 | 213892.3236 | 14.31948369 |
| UIJ67392.1 | YtxH_domain-containing_protein_[Bacillus_cereus]           | CPTF_Co         | 633449.3    | 607515.7003 | 95.90597074 |
| UIJ67392.1 | YtxH_domain-containing_protein_[Bacillus_cereus]           | CPTF_Cu         | 655172      | 392228.2748 | 59.86645871 |
| UIJ67392.1 | YtxH_domain-containing_protein_[Bacillus_cereus]           | CPTF_Fe         | 785854.3333 | 570211.9626 | 72.55949842 |
| UIJ67392.1 | YtxH_domain-containing_protein_[Bacillus_cereus]           | CPTF_Mn         | 951600.7    | 840346.5574 | 88.30837678 |
| UIJ67392.1 | YtxH_domain-containing_protein_[Bacillus_cereus]           | CPTF_Ni         | 631799.5333 | 260861.2205 | 41.28860608 |
| UIJ67392.1 | YtxH_domain-containing_protein_[Bacillus_cereus]           | CPTF_U          | 486570.9333 | 332713.2532 | 68.37918799 |
| UIJ67392.1 | YtxH_domain-containing_protein_[Bacillus_cereus]           | CPTF_metals_mix | 1976299.3   | 57204.78548 | 2.894540593 |
| UIJ67392.1 | YtxH_domain-containing_protein_[Bacillus_cereus]           | CPTF_zcontrol   | 616028.9667 | 162311.6343 | 26.34805229 |
| UIJ67393.1 | HIT_family_protein_[Bacillus_cereus]                       | CPTF_Al         | 796799.6667 | 82231.70226 | 10.32024808 |
| UIJ67393.1 | HIT_family_protein_[Bacillus_cereus]                       | CPTF_Cd         | 924438.6667 | 35464.86115 | 3.83636713  |
| UIJ67393.1 | HIT_family_protein_[Bacillus_cereus]                       | CPTF_Co         | 643266.3333 | 44502.526   | 6.918211586 |
| UIJ67393.1 | HIT_family_protein_[Bacillus_cereus]                       | CPTF_Cu         | 626277.3333 | 134412.9169 | 21.46220368 |
| UIJ67393.1 | HIT_family_protein_[Bacillus_cereus]                       | CPTF_Fe         | 731452.8333 | 197579.1782 | 27.01188227 |
| UIJ67393.1 | HIT_family_protein_[Bacillus_cereus]                       | CPTF_Mn         | 603892.0333 | 210506.2357 | 34.85825678 |
| UIJ67393.1 | HIT_family_protein_[Bacillus_cereus]                       | CPTF_Ni         | 886861      | 64318.06579 | 7.25232768  |
| UIJ67393.1 | HIT_family_protein_[Bacillus_cereus]                       | CPTF_U          | 624582.4667 | 128461.2928 | 20.56754707 |
| UIJ67393.1 | HIT_family_protein_[Bacillus_cereus]                       | CPTF_metals_mix | 691413.3333 | 165951.6098 | 24.00179484 |
| UIJ67393.1 | HIT_family_protein_[Bacillus_cereus]                       | CPTF_zcontrol   | 477570.3    | 220750.7777 | 46.22372407 |
| UIJ67394.1 | ABC_transporter_ATP-binding_protein_EcsA_[Bacillus_cereus] | CPTF_Al         | 123457.1667 | 37961.29531 | 30.74855542 |
| UIJ67394.1 | ABC_transporter_ATP-binding_protein_EcsA_[Bacillus_cereus] | CPTF_Cd         | 146441.9    | 38940.75727 | 26.59126744 |
| UIJ67394.1 | ABC_transporter_ATP-binding_protein_EcsA_[Bacillus_cereus] | CPTF_Co         | 132569      | 27865.28186 | 21.01945542 |
| UIJ67394.1 | ABC_transporter_ATP-binding_protein_EcsA_[Bacillus_cereus] | CPTF_Cu         | 119018.8    | 20266.88817 | 17.02830828 |
| UIJ67394.1 | ABC_transporter_ATP-binding_protein_EcsA_[Bacillus_cereus] | CPTF_Fe         | 145113.6667 | 15838.73165 | 10.91470708 |
| UIJ67394.1 | ABC_transporter_ATP-binding_protein_EcsA_[Bacillus_cereus] | CPTF_Mn         | 161277.4    | 66796.87844 | 41.41738299 |
| UIJ67394.1 | ABC_transporter_ATP-binding_protein_EcsA_[Bacillus_cereus] | CPTF_Ni         | 147482.6667 | 22871.24387 | 15.50775043 |
| UIJ67394.1 | ABC_transporter_ATP-binding_protein_EcsA_[Bacillus_cereus] | CPTF_U          | 54659       | 94672.16509 | 173.2050808 |
| UIJ67394.1 | ABC_transporter_ATP-binding_protein_EcsA_[Bacillus_cereus] | CPTF_metals_mix | 389852.7333 | 49202.09199 | 12.62068668 |
| UIJ67394.1 | ABC_transporter_ATP-binding_protein_EcsA_[Bacillus_cereus] | CPTF_zcontrol   | 158710.6667 | 35988.19643 | 22.67534828 |
| UIJ67406.1 | heme-degrading_monooxygenase_HmoB_[Bacillus_cereus]        | CPTF_Al         | 871457.2667 | 151076.852  | 17.33611707 |
| UIJ67406.1 | heme-degrading_monooxygenase_HmoB_[Bacillus_cereus]        | CPTF_Cd         | 1485388.867 | 228353.0558 | 15.37328446 |
| UIJ67406.1 | heme-degrading_monooxygenase_HmoB_[Bacillus_cereus]        | CPTF_Co         | 816979.0333 | 158669.0232 | 19.42143149 |
| UIJ67406.1 | heme-degrading_monooxygenase_HmoB_[Bacillus_cereus]        | CPTF_Cu         | 813486.6667 | 300955.0567 | 36.99569631 |
| UIJ67406.1 | heme-degrading_monooxygenase_HmoB_[Bacillus_cereus]        | CPTF_Fe         | 908811      | 139109.0053 | 15.30670351 |
| UIJ67406.1 | heme-degrading_monooxygenase_HmoB_[Bacillus_cereus]        | CPTF_Mn         | 959143.8    | 546096.0748 | 56.9357874  |
| UIJ67406.1 | heme-degrading_monooxygenase_HmoB_[Bacillus_cereus]        | CPTF_Ni         | 410562.9    | 252628.6077 | 61.5322543  |
| UIJ67406.1 | heme-degrading_monooxygenase_HmoB_[Bacillus_cereus]        | CPTF_U          | 454356.4667 | 98319.49345 | 21.6392856  |

|            |                                                              |                 |             |             |             |
|------------|--------------------------------------------------------------|-----------------|-------------|-------------|-------------|
| UIJ67406.1 | heme-degrading_monooxygenase_HmoB_[Bacillus_cereus]          | CPTF_metals_mix | 1717486.167 | 159031.7014 | 9.259562289 |
| UIJ67406.1 | heme-degrading_monooxygenase_HmoB_[Bacillus_cereus]          | CPTF_zcontrol   | 606243.5667 | 226602.945  | 37.37820201 |
| UIJ67408.1 | uroporphyrinogen_decarboxylase_[Bacillus_cereus]             | CPTF_Al         | 1196434     | 25123.07839 | 2.099829861 |
| UIJ67408.1 | uroporphyrinogen_decarboxylase_[Bacillus_cereus]             | CPTF_Cd         | 1244040.667 | 86132.11341 | 6.923576996 |
| UIJ67408.1 | uroporphyrinogen_decarboxylase_[Bacillus_cereus]             | CPTF_Co         | 1053240.267 | 29028.70965 | 2.756133674 |
| UIJ67408.1 | uroporphyrinogen_decarboxylase_[Bacillus_cereus]             | CPTF_Cu         | 1046786.333 | 100029.2605 | 9.555843187 |
| UIJ67408.1 | uroporphyrinogen_decarboxylase_[Bacillus_cereus]             | CPTF_Fe         | 1200148.567 | 62628.67727 | 5.218410371 |
| UIJ67408.1 | uroporphyrinogen_decarboxylase_[Bacillus_cereus]             | CPTF_Mn         | 1186666.667 | 98149.54576 | 8.271029137 |
| UIJ67408.1 | uroporphyrinogen_decarboxylase_[Bacillus_cereus]             | CPTF_Ni         | 1203333.333 | 90737.71726 | 7.54053052  |
| UIJ67408.1 | uroporphyrinogen_decarboxylase_[Bacillus_cereus]             | CPTF_U          | 1269831.367 | 17468.38034 | 1.37564568  |
| UIJ67408.1 | uroporphyrinogen_decarboxylase_[Bacillus_cereus]             | CPTF_metals_mix | 871207.1333 | 96086.93564 | 11.02917228 |
| UIJ67408.1 | uroporphyrinogen_decarboxylase_[Bacillus_cereus]             | CPTF_zcontrol   | 1323333.333 | 5773.502692 | 0.436284838 |
| UIJ67409.1 | ferrochelataze_[Bacillus_cereus]                             | CPTF_Al         | 397775.7667 | 214576.2898 | 53.94403275 |
| UIJ67409.1 | ferrochelataze_[Bacillus_cereus]                             | CPTF_Cd         | 367677.8    | 61675.03278 | 16.77420633 |
| UIJ67409.1 | ferrochelataze_[Bacillus_cereus]                             | CPTF_Co         | 467098.2    | 210944.2582 | 45.16058041 |
| UIJ67409.1 | ferrochelataze_[Bacillus_cereus]                             | CPTF_Cu         | 451343.8667 | 180784.3631 | 40.05468478 |
| UIJ67409.1 | ferrochelataze_[Bacillus_cereus]                             | CPTF_Fe         | 320235.2    | 184640.0066 | 57.65762372 |
| UIJ67409.1 | ferrochelataze_[Bacillus_cereus]                             | CPTF_Mn         | 218260.1333 | 116784.6254 | 53.50780856 |
| UIJ67409.1 | ferrochelataze_[Bacillus_cereus]                             | CPTF_Ni         | 215615.1    | 30031.14794 | 13.92812838 |
| UIJ67409.1 | ferrochelataze_[Bacillus_cereus]                             | CPTF_U          | 72512.33333 | 96502.99355 | 133.0849376 |
| UIJ67409.1 | ferrochelataze_[Bacillus_cereus]                             | CPTF_metals_mix | 644122.9333 | 173730.958  | 26.9717082  |
| UIJ67409.1 | ferrochelataze_[Bacillus_cereus]                             | CPTF_zcontrol   | 182229      | 26504.22847 | 14.54446245 |
| UIJ67411.1 | DUF4026_domain-containing_protein_[Bacillus_cereus]          | CPTF_Al         | 23173.86667 | 21598.85501 | 93.20350084 |
| UIJ67411.1 | DUF4026_domain-containing_protein_[Bacillus_cereus]          | CPTF_Cd         | 54218.9     | 15041.55784 | 27.74227776 |
| UIJ67411.1 | DUF4026_domain-containing_protein_[Bacillus_cereus]          | CPTF_Co         | 0           | 0           | 0           |
| UIJ67411.1 | DUF4026_domain-containing_protein_[Bacillus_cereus]          | CPTF_Cu         | 0           | 0           | 0           |
| UIJ67411.1 | DUF4026_domain-containing_protein_[Bacillus_cereus]          | CPTF_Fe         | 29994.06667 | 16014.81886 | 53.39328955 |
| UIJ67411.1 | DUF4026_domain-containing_protein_[Bacillus_cereus]          | CPTF_Mn         | 0           | 0           | 0           |
| UIJ67411.1 | DUF4026_domain-containing_protein_[Bacillus_cereus]          | CPTF_Ni         | 0           | 0           | 0           |
| UIJ67411.1 | DUF4026_domain-containing_protein_[Bacillus_cereus]          | CPTF_U          | 0           | 0           | 0           |
| UIJ67411.1 | DUF4026_domain-containing_protein_[Bacillus_cereus]          | CPTF_metals_mix | 121898.7    | 19983.97302 | 16.39391808 |
| UIJ67411.1 | DUF4026_domain-containing_protein_[Bacillus_cereus]          | CPTF_zcontrol   | 0           | 0           | 0           |
| UIJ67412.1 | DUF6359_domain-containing_protein_[Bacillus_cereus]          | CPTF_Al         | 0           | 0           | 0           |
| UIJ67412.1 | DUF6359_domain-containing_protein_[Bacillus_cereus]          | CPTF_Cd         | 0           | 0           | 0           |
| UIJ67412.1 | DUF6359_domain-containing_protein_[Bacillus_cereus]          | CPTF_Co         | 0           | 0           | 0           |
| UIJ67412.1 | DUF6359_domain-containing_protein_[Bacillus_cereus]          | CPTF_Cu         | 0           | 0           | 0           |
| UIJ67412.1 | DUF6359_domain-containing_protein_[Bacillus_cereus]          | CPTF_Fe         | 21682.43333 | 37555.07617 | 173.2050808 |
| UIJ67412.1 | DUF6359_domain-containing_protein_[Bacillus_cereus]          | CPTF_Mn         | 0           | 0           | 0           |
| UIJ67412.1 | DUF6359_domain-containing_protein_[Bacillus_cereus]          | CPTF_Ni         | 0           | 0           | 0           |
| UIJ67412.1 | DUF6359_domain-containing_protein_[Bacillus_cereus]          | CPTF_U          | 21314       | 36916.93091 | 173.2050808 |
| UIJ67412.1 | DUF6359_domain-containing_protein_[Bacillus_cereus]          | CPTF_metals_mix | 170470      | 24408.58892 | 14.3184073  |
| UIJ67412.1 | DUF6359_domain-containing_protein_[Bacillus_cereus]          | CPTF_zcontrol   | 0           | 0           | 0           |
| UIJ67416.1 | TetR/AcrR_family_transcriptional_regulator_[Bacillus_cereus] | CPTF_Al         | 76337.5     | 16686.39184 | 21.85870881 |
| UIJ67416.1 | TetR/AcrR_family_transcriptional_regulator_[Bacillus_cereus] | CPTF_Cd         | 46818.63333 | 41360.43713 | 88.34182927 |
| UIJ67416.1 | TetR/AcrR_family_transcriptional_regulator_[Bacillus_cereus] | CPTF_Co         | 66394.8     | 14724.90658 | 22.17780095 |
| UIJ67416.1 | TetR/AcrR_family_transcriptional_regulator_[Bacillus_cereus] | CPTF_Cu         | 42565.36667 | 39118.39886 | 91.90194264 |
| UIJ67416.1 | TetR/AcrR_family_transcriptional_regulator_[Bacillus_cereus] | CPTF_Fe         | 39663.16667 | 35881.9548  | 90.46669193 |
| UIJ67416.1 | TetR/AcrR_family_transcriptional_regulator_[Bacillus_cereus] | CPTF_Mn         | 13140.3     | 22759.66723 | 173.2050808 |
| UIJ67416.1 | TetR/AcrR_family_transcriptional_regulator_[Bacillus_cereus] | CPTF_Ni         | 34020.86667 | 33971.3587  | 99.85447765 |
| UIJ67416.1 | TetR/AcrR_family_transcriptional_regulator_[Bacillus_cereus] | CPTF_U          | 0           | 0           | 0           |
| UIJ67416.1 | TetR/AcrR_family_transcriptional_regulator_[Bacillus_cereus] | CPTF_metals_mix | 65249.5     | 57461.82131 | 88.06476878 |
| UIJ67416.1 | TetR/AcrR_family_transcriptional_regulator_[Bacillus_cereus] | CPTF_zcontrol   | 0           | 0           | 0           |
| UIJ67425.1 | lipoate--protein_ligase_[Bacillus_cereus]                    | CPTF_Al         | 404955.8333 | 109043.2573 | 26.92719757 |
| UIJ67425.1 | lipoate--protein_ligase_[Bacillus_cereus]                    | CPTF_Cd         | 307013.8667 | 94435.02835 | 30.75920621 |
| UIJ67425.1 | lipoate--protein_ligase_[Bacillus_cereus]                    | CPTF_Co         | 557998.7    | 122699.9365 | 21.98928716 |
| UIJ67425.1 | lipoate--protein_ligase_[Bacillus_cereus]                    | CPTF_Cu         | 706443.4333 | 19484.49594 | 2.758111268 |
| UIJ67425.1 | lipoate--protein_ligase_[Bacillus_cereus]                    | CPTF_Fe         | 461410.6667 | 174550.4858 | 37.82974656 |
| UIJ67425.1 | lipoate--protein_ligase_[Bacillus_cereus]                    | CPTF_Mn         | 413214.6333 | 30233.40071 | 7.316633601 |
| UIJ67425.1 | lipoate--protein_ligase_[Bacillus_cereus]                    | CPTF_Ni         | 502898.8333 | 98028.93437 | 19.49277427 |
| UIJ67425.1 | lipoate--protein_ligase_[Bacillus_cereus]                    | CPTF_U          | 570150.1333 | 40543.78486 | 7.111071714 |
| UIJ67425.1 | lipoate--protein_ligase_[Bacillus_cereus]                    | CPTF_metals_mix | 899048.1667 | 136491.8287 | 15.18181492 |

|            |                                                           |                 |             |             |             |
|------------|-----------------------------------------------------------|-----------------|-------------|-------------|-------------|
| UIJ67425.1 | lipoate--protein_ligase_[Bacillus_cereus]                 | CPTF_zcontrol   | 514396      | 49802.57406 | 9.681757646 |
| UIJ67427.1 | fatty_acid--CoA_ligase_family_protein_[Bacillus_cereus]   | CPTF_Al         | 37677.66667 | 65259.63298 | 173.2050808 |
| UIJ67427.1 | fatty_acid--CoA_ligase_family_protein_[Bacillus_cereus]   | CPTF_Cd         | 66346.23333 | 61943.48669 | 93.36398403 |
| UIJ67427.1 | fatty_acid--CoA_ligase_family_protein_[Bacillus_cereus]   | CPTF_Co         | 53569.66667 | 92785.38441 | 173.2050808 |
| UIJ67427.1 | fatty_acid--CoA_ligase_family_protein_[Bacillus_cereus]   | CPTF_Cu         | 33071.43333 | 57281.40281 | 173.2050808 |
| UIJ67427.1 | fatty_acid--CoA_ligase_family_protein_[Bacillus_cereus]   | CPTF_Fe         | 42022.66667 | 72785.39374 | 173.2050808 |
| UIJ67427.1 | fatty_acid--CoA_ligase_family_protein_[Bacillus_cereus]   | CPTF_Mn         | 0           | 0           | 0           |
| UIJ67427.1 | fatty_acid--CoA_ligase_family_protein_[Bacillus_cereus]   | CPTF_Ni         | 37018.66667 | 64118.2115  | 173.2050808 |
| UIJ67427.1 | fatty_acid--CoA_ligase_family_protein_[Bacillus_cereus]   | CPTF_U          | 0           | 0           | 0           |
| UIJ67427.1 | fatty_acid--CoA_ligase_family_protein_[Bacillus_cereus]   | CPTF_metals_mix | 0           | 0           | 0           |
| UIJ67427.1 | fatty_acid--CoA_ligase_family_protein_[Bacillus_cereus]   | CPTF_zcontrol   | 0           | 0           | 0           |
| UIJ67457.1 | AraC_family_transcriptional_regulator_[Bacillus_cereus]   | CPTF_Al         | 0           | 0           | 0           |
| UIJ67457.1 | AraC_family_transcriptional_regulator_[Bacillus_cereus]   | CPTF_Cd         | 36177.33333 | 62660.97942 | 173.2050808 |
| UIJ67457.1 | AraC_family_transcriptional_regulator_[Bacillus_cereus]   | CPTF_Co         | 31958.83333 | 55354.32308 | 173.2050808 |
| UIJ67457.1 | AraC_family_transcriptional_regulator_[Bacillus_cereus]   | CPTF_Cu         | 5960.866667 | 10324.52392 | 173.2050808 |
| UIJ67457.1 | AraC_family_transcriptional_regulator_[Bacillus_cereus]   | CPTF_Fe         | 33470.33333 | 57972.31788 | 173.2050808 |
| UIJ67457.1 | AraC_family_transcriptional_regulator_[Bacillus_cereus]   | CPTF_Mn         | 0           | 0           | 0           |
| UIJ67457.1 | AraC_family_transcriptional_regulator_[Bacillus_cereus]   | CPTF_Ni         | 0           | 0           | 0           |
| UIJ67457.1 | AraC_family_transcriptional_regulator_[Bacillus_cereus]   | CPTF_U          | 0           | 0           | 0           |
| UIJ67457.1 | AraC_family_transcriptional_regulator_[Bacillus_cereus]   | CPTF_metals_mix | 74956.5     | 25494.92694 | 34.01296344 |
| UIJ67457.1 | AraC_family_transcriptional_regulator_[Bacillus_cereus]   | CPTF_zcontrol   | 41768       | 72344.29813 | 173.2050808 |
| UIJ67468.1 | isocitrate_lyase_[Bacillus_cereus]                        | CPTF_Al         | 56872.3     | 98505.71314 | 173.2050808 |
| UIJ67468.1 | isocitrate_lyase_[Bacillus_cereus]                        | CPTF_Cd         | 69003.93333 | 66612.22047 | 96.53394706 |
| UIJ67468.1 | isocitrate_lyase_[Bacillus_cereus]                        | CPTF_Co         | 145861.8333 | 175794.1722 | 120.521022  |
| UIJ67468.1 | isocitrate_lyase_[Bacillus_cereus]                        | CPTF_Cu         | 66602       | 18838.6536  | 28.28541725 |
| UIJ67468.1 | isocitrate_lyase_[Bacillus_cereus]                        | CPTF_Fe         | 96890.33333 | 167818.9801 | 173.2050808 |
| UIJ67468.1 | isocitrate_lyase_[Bacillus_cereus]                        | CPTF_Mn         | 81101.5     | 97460.20119 | 120.1706518 |
| UIJ67468.1 | isocitrate_lyase_[Bacillus_cereus]                        | CPTF_Ni         | 15376.6     | 26633.05245 | 173.2050808 |
| UIJ67468.1 | isocitrate_lyase_[Bacillus_cereus]                        | CPTF_U          | 48434.33333 | 45133.42144 | 93.1847686  |
| UIJ67468.1 | isocitrate_lyase_[Bacillus_cereus]                        | CPTF_metals_mix | 83369.7     | 62198.63811 | 74.60580776 |
| UIJ67468.1 | isocitrate_lyase_[Bacillus_cereus]                        | CPTF_zcontrol   | 28453.66667 | 49283.19633 | 173.2050808 |
| UIJ67470.1 | RNA_chaperone/antiterminator_CspA_[Bacillus_cereus]       | CPTF_Al         | 1184801     | 463854.9378 | 39.15045124 |
| UIJ67470.1 | RNA_chaperone/antiterminator_CspA_[Bacillus_cereus]       | CPTF_Cd         | 1652326.667 | 132088.0554 | 7.99406425  |
| UIJ67470.1 | RNA_chaperone/antiterminator_CspA_[Bacillus_cereus]       | CPTF_Co         | 1961996.333 | 71468.25895 | 3.642629588 |
| UIJ67470.1 | RNA_chaperone/antiterminator_CspA_[Bacillus_cereus]       | CPTF_Cu         | 1317758.667 | 90972.593   | 6.903585254 |
| UIJ67470.1 | RNA_chaperone/antiterminator_CspA_[Bacillus_cereus]       | CPTF_Fe         | 1943301.667 | 431649.0648 | 22.21214916 |
| UIJ67470.1 | RNA_chaperone/antiterminator_CspA_[Bacillus_cereus]       | CPTF_Mn         | 1134856.333 | 795833.5519 | 70.12637006 |
| UIJ67470.1 | RNA_chaperone/antiterminator_CspA_[Bacillus_cereus]       | CPTF_Ni         | 1371482.333 | 389850.7758 | 28.42550475 |
| UIJ67470.1 | RNA_chaperone/antiterminator_CspA_[Bacillus_cereus]       | CPTF_U          | 1227214.667 | 161229.8198 | 13.13786611 |
| UIJ67470.1 | RNA_chaperone/antiterminator_CspA_[Bacillus_cereus]       | CPTF_metals_mix | 3726525     | 702428.7735 | 18.8494314  |
| UIJ67470.1 | RNA_chaperone/antiterminator_CspA_[Bacillus_cereus]       | CPTF_zcontrol   | 1367093     | 82699.51687 | 6.049297076 |
| UIJ67477.1 | helicase-exonuclease_AddAB_subunit_AddA_[Bacillus_cereus] | CPTF_Al         | 301480      | 53649.68731 | 17.79543827 |
| UIJ67477.1 | helicase-exonuclease_AddAB_subunit_AddA_[Bacillus_cereus] | CPTF_Cd         | 230448.6667 | 65047.72341 | 28.22655664 |
| UIJ67477.1 | helicase-exonuclease_AddAB_subunit_AddA_[Bacillus_cereus] | CPTF_Co         | 400088      | 244122.5906 | 61.01722385 |
| UIJ67477.1 | helicase-exonuclease_AddAB_subunit_AddA_[Bacillus_cereus] | CPTF_Cu         | 222381.6667 | 59711.39734 | 26.85086331 |
| UIJ67477.1 | helicase-exonuclease_AddAB_subunit_AddA_[Bacillus_cereus] | CPTF_Fe         | 314707.3333 | 238517.6407 | 75.79030274 |
| UIJ67477.1 | helicase-exonuclease_AddAB_subunit_AddA_[Bacillus_cereus] | CPTF_Mn         | 301863.3333 | 202007.0992 | 66.92005187 |
| UIJ67477.1 | helicase-exonuclease_AddAB_subunit_AddA_[Bacillus_cereus] | CPTF_Ni         | 185817.3333 | 27307.19151 | 14.69571811 |
| UIJ67477.1 | helicase-exonuclease_AddAB_subunit_AddA_[Bacillus_cereus] | CPTF_U          | 171817.3333 | 60360.46152 | 35.13060082 |
| UIJ67477.1 | helicase-exonuclease_AddAB_subunit_AddA_[Bacillus_cereus] | CPTF_metals_mix | 163151.9333 | 84074.6708  | 51.53151978 |
| UIJ67477.1 | helicase-exonuclease_AddAB_subunit_AddA_[Bacillus_cereus] | CPTF_zcontrol   | 281451      | 186153.1363 | 66.14051339 |
| UIJ67488.1 | ornithine_aminotransferase_[Bacillus_cereus]              | CPTF_Al         | 11548239.57 | 492978.162  | 4.268859848 |
| UIJ67488.1 | ornithine_aminotransferase_[Bacillus_cereus]              | CPTF_Cd         | 11082377.97 | 570137.7506 | 5.144543458 |
| UIJ67488.1 | ornithine_aminotransferase_[Bacillus_cereus]              | CPTF_Co         | 11513725.33 | 429977.9177 | 3.734481284 |
| UIJ67488.1 | ornithine_aminotransferase_[Bacillus_cereus]              | CPTF_Cu         | 12395903.27 | 227624.3756 | 1.836287124 |
| UIJ67488.1 | ornithine_aminotransferase_[Bacillus_cereus]              | CPTF_Fe         | 10684757.57 | 121217.845  | 1.134493171 |
| UIJ67488.1 | ornithine_aminotransferase_[Bacillus_cereus]              | CPTF_Mn         | 11366105.63 | 1114930.669 | 9.809258375 |
| UIJ67488.1 | ornithine_aminotransferase_[Bacillus_cereus]              | CPTF_Ni         | 10734398.1  | 1177269.264 | 10.96725921 |
| UIJ67488.1 | ornithine_aminotransferase_[Bacillus_cereus]              | CPTF_U          | 9985574.567 | 413166.7789 | 4.137636509 |
| UIJ67488.1 | ornithine_aminotransferase_[Bacillus_cereus]              | CPTF_metals_mix | 13831839.4  | 622267.7539 | 4.498806962 |
| UIJ67488.1 | ornithine_aminotransferase_[Bacillus_cereus]              | CPTF_zcontrol   | 10922378.7  | 521125.1835 | 4.771169338 |

|            |                                                                 |                 |             |             |             |
|------------|-----------------------------------------------------------------|-----------------|-------------|-------------|-------------|
| UIJ67493.1 | catalase [Bacillus cereus]                                      | CPTF_Al         | 96368.53333 | 103379.0111 | 107.2746544 |
| UIJ67493.1 | catalase [Bacillus cereus]                                      | CPTF_Cd         | 104933.4667 | 47478.90116 | 45.24667169 |
| UIJ67493.1 | catalase [Bacillus cereus]                                      | CPTF_Co         | 122867.4    | 74927.87563 | 60.9827144  |
| UIJ67493.1 | catalase [Bacillus cereus]                                      | CPTF_Cu         | 242655.9    | 229261.6178 | 94.48013331 |
| UIJ67493.1 | catalase [Bacillus cereus]                                      | CPTF_Fe         | 15278.73333 | 26463.54241 | 173.2050808 |
| UIJ67493.1 | catalase [Bacillus cereus]                                      | CPTF_Mn         | 0           | 0           | 0           |
| UIJ67493.1 | catalase [Bacillus cereus]                                      | CPTF_Ni         | 21411.86667 | 37086.44095 | 173.2050808 |
| UIJ67493.1 | catalase [Bacillus cereus]                                      | CPTF_U          | 47619.96667 | 42522.06826 | 89.29461996 |
| UIJ67493.1 | catalase [Bacillus cereus]                                      | CPTF_metals_mix | 138779.6667 | 36940.81219 | 26.61831742 |
| UIJ67493.1 | catalase [Bacillus cereus]                                      | CPTF_zcontrol   | 27167.6     | 24640.56356 | 90.69834494 |
| UIJ67496.1 | YajQ_family_cyclic_di-GMP-binding_protein [Bacillus cereus]     | CPTF_Al         | 2599214.233 | 341897.6354 | 13.15388439 |
| UIJ67496.1 | YajQ_family_cyclic_di-GMP-binding_protein [Bacillus cereus]     | CPTF_Cd         | 2408007     | 942240.5427 | 39.1294769  |
| UIJ67496.1 | YajQ_family_cyclic_di-GMP-binding_protein [Bacillus cereus]     | CPTF_Co         | 2211178.967 | 344318.0864 | 15.57169689 |
| UIJ67496.1 | YajQ_family_cyclic_di-GMP-binding_protein [Bacillus cereus]     | CPTF_Cu         | 2699820.167 | 312827.8933 | 11.58699002 |
| UIJ67496.1 | YajQ_family_cyclic_di-GMP-binding_protein [Bacillus cereus]     | CPTF_Fe         | 2286016.633 | 999159.8174 | 43.70746052 |
| UIJ67496.1 | YajQ_family_cyclic_di-GMP-binding_protein [Bacillus cereus]     | CPTF_Mn         | 2395481     | 769314.2706 | 32.11523158 |
| UIJ67496.1 | YajQ_family_cyclic_di-GMP-binding_protein [Bacillus cereus]     | CPTF_Ni         | 1044628.833 | 1128808.309 | 108.0583144 |
| UIJ67496.1 | YajQ_family_cyclic_di-GMP-binding_protein [Bacillus cereus]     | CPTF_U          | 1662079.7   | 1405786.259 | 84.57995478 |
| UIJ67496.1 | YajQ_family_cyclic_di-GMP-binding_protein [Bacillus cereus]     | CPTF_metals_mix | 3619694     | 233985.2334 | 6.464226904 |
| UIJ67496.1 | YajQ_family_cyclic_di-GMP-binding_protein [Bacillus cereus]     | CPTF_zcontrol   | 2598508.6   | 199265.6123 | 7.668460759 |
| UIJ67497.1 | S1-like_domain-containing_RNA-binding_protein [Bacillus cereus] | CPTF_Al         | 117457.2    | 115567.1045 | 98.3908219  |
| UIJ67497.1 | S1-like_domain-containing_RNA-binding_protein [Bacillus cereus] | CPTF_Cd         | 9643.133333 | 16702.39688 | 173.2050808 |
| UIJ67497.1 | S1-like_domain-containing_RNA-binding_protein [Bacillus cereus] | CPTF_Co         | 93032.3     | 59563.30263 | 64.02432556 |
| UIJ67497.1 | S1-like_domain-containing_RNA-binding_protein [Bacillus cereus] | CPTF_Cu         | 17912.5     | 31025.36009 | 173.2050808 |
| UIJ67497.1 | S1-like_domain-containing_RNA-binding_protein [Bacillus cereus] | CPTF_Fe         | 0           | 0           | 0           |
| UIJ67497.1 | S1-like_domain-containing_RNA-binding_protein [Bacillus cereus] | CPTF_Mn         | 9464.66667  | 16393.28354 | 173.2050808 |
| UIJ67497.1 | S1-like_domain-containing_RNA-binding_protein [Bacillus cereus] | CPTF_Ni         | 54209.73333 | 48870.86812 | 90.1514638  |
| UIJ67497.1 | S1-like_domain-containing_RNA-binding_protein [Bacillus cereus] | CPTF_U          | 41006.5     | 71025.34144 | 173.2050808 |
| UIJ67497.1 | S1-like_domain-containing_RNA-binding_protein [Bacillus cereus] | CPTF_metals_mix | 120414.9    | 39376.22751 | 32.70046108 |
| UIJ67497.1 | S1-like_domain-containing_RNA-binding_protein [Bacillus cereus] | CPTF_zcontrol   | 28253.16667 | 24486.99989 | 86.66993042 |
| UIJ67509.1 | ATP-dependent_chaperone_ClpB [Bacillus cereus]                  | CPTF_Al         | 690076.6667 | 68778.53306 | 9.96679592  |
| UIJ67509.1 | ATP-dependent_chaperone_ClpB [Bacillus cereus]                  | CPTF_Cd         | 1008212.8   | 209441.9667 | 20.77358735 |
| UIJ67509.1 | ATP-dependent_chaperone_ClpB [Bacillus cereus]                  | CPTF_Co         | 856751.3333 | 185225.7434 | 21.61954539 |
| UIJ67509.1 | ATP-dependent_chaperone_ClpB [Bacillus cereus]                  | CPTF_Cu         | 920372.6333 | 109874.5699 | 11.93805269 |
| UIJ67509.1 | ATP-dependent_chaperone_ClpB [Bacillus cereus]                  | CPTF_Fe         | 905299.6667 | 63814.17626 | 7.048956121 |
| UIJ67509.1 | ATP-dependent_chaperone_ClpB [Bacillus cereus]                  | CPTF_Mn         | 651618.9    | 204068.6833 | 31.31718299 |
| UIJ67509.1 | ATP-dependent_chaperone_ClpB [Bacillus cereus]                  | CPTF_Ni         | 745211.6667 | 93186.56213 | 12.50471058 |
| UIJ67509.1 | ATP-dependent_chaperone_ClpB [Bacillus cereus]                  | CPTF_U          | 762172.5    | 132209.8595 | 17.34644841 |
| UIJ67509.1 | ATP-dependent_chaperone_ClpB [Bacillus cereus]                  | CPTF_metals_mix | 1645118.547 | 60017.47199 | 3.648215633 |
| UIJ67509.1 | ATP-dependent_chaperone_ClpB [Bacillus cereus]                  | CPTF_zcontrol   | 1581801.6   | 1695446.806 | 107.1845424 |
| UIJ67513.1 | ComZ_family_protein [Bacillus cereus]                           | CPTF_Al         | 0           | 0           | 0           |
| UIJ67513.1 | ComZ_family_protein [Bacillus cereus]                           | CPTF_Cd         | 0           | 0           | 0           |
| UIJ67513.1 | ComZ_family_protein [Bacillus cereus]                           | CPTF_Co         | 0           | 0           | 0           |
| UIJ67513.1 | ComZ_family_protein [Bacillus cereus]                           | CPTF_Cu         | 26160.53333 | 45311.37289 | 173.2050808 |
| UIJ67513.1 | ComZ_family_protein [Bacillus cereus]                           | CPTF_Fe         | 0           | 0           | 0           |
| UIJ67513.1 | ComZ_family_protein [Bacillus cereus]                           | CPTF_Mn         | 0           | 0           | 0           |
| UIJ67513.1 | ComZ_family_protein [Bacillus cereus]                           | CPTF_Ni         | 8736.233333 | 15131.6     | 173.2050808 |
| UIJ67513.1 | ComZ_family_protein [Bacillus cereus]                           | CPTF_U          | 0           | 0           | 0           |
| UIJ67513.1 | ComZ_family_protein [Bacillus cereus]                           | CPTF_metals_mix | 38959.5     | 36190.2474  | 92.8919709  |
| UIJ67513.1 | ComZ_family_protein [Bacillus cereus]                           | CPTF_zcontrol   | 0           | 0           | 0           |
| UIJ67514.1 | beta-ketoacyl-ACP_synthase_III [Bacillus cereus]                | CPTF_Al         | 2572233.367 | 89194.16851 | 3.467576841 |
| UIJ67514.1 | beta-ketoacyl-ACP_synthase_III [Bacillus cereus]                | CPTF_Cd         | 2444130.767 | 87971.32655 | 3.599288866 |
| UIJ67514.1 | beta-ketoacyl-ACP_synthase_III [Bacillus cereus]                | CPTF_Co         | 2659667.733 | 63932.53996 | 2.403779207 |
| UIJ67514.1 | beta-ketoacyl-ACP_synthase_III [Bacillus cereus]                | CPTF_Cu         | 2828888.667 | 91702.85405 | 3.241656525 |
| UIJ67514.1 | beta-ketoacyl-ACP_synthase_III [Bacillus cereus]                | CPTF_Fe         | 2377442.733 | 245107.4515 | 10.30971001 |
| UIJ67514.1 | beta-ketoacyl-ACP_synthase_III [Bacillus cereus]                | CPTF_Mn         | 2401263.033 | 268731.3238 | 11.19124894 |
| UIJ67514.1 | beta-ketoacyl-ACP_synthase_III [Bacillus cereus]                | CPTF_Ni         | 2563141.4   | 56102.84562 | 2.188831471 |
| UIJ67514.1 | beta-ketoacyl-ACP_synthase_III [Bacillus cereus]                | CPTF_U          | 2204189.467 | 161174.3406 | 7.312181779 |
| UIJ67514.1 | beta-ketoacyl-ACP_synthase_III [Bacillus cereus]                | CPTF_metals_mix | 2362385.867 | 97827.76557 | 4.141057858 |
| UIJ67514.1 | beta-ketoacyl-ACP_synthase_III [Bacillus cereus]                | CPTF_zcontrol   | 2461736     | 220974.3816 | 8.976363898 |
| UIJ67515.1 | beta-ketoacyl-ACP_synthase_II [Bacillus cereus]                 | CPTF_Al         | 466377.3667 | 75476.3957  | 16.18354601 |

|            |                                                                  |                 |             |             |             |
|------------|------------------------------------------------------------------|-----------------|-------------|-------------|-------------|
| UIJ67515.1 | beta-ketoacyl-ACP_synthase_II [Bacillus_cereus]                  | CPTF_Cd         | 1310458.667 | 513330.3974 | 39.1718114  |
| UIJ67515.1 | beta-ketoacyl-ACP_synthase_II [Bacillus_cereus]                  | CPTF_Co         | 842881.06   | 436085.925  | 51.73753993 |
| UIJ67515.1 | beta-ketoacyl-ACP_synthase_II [Bacillus_cereus]                  | CPTF_Cu         | 1019417.8   | 662844.1561 | 65.02183463 |
| UIJ67515.1 | beta-ketoacyl-ACP_synthase_II [Bacillus_cereus]                  | CPTF_Fe         | 1251761.333 | 747488.569  | 59.71494319 |
| UIJ67515.1 | beta-ketoacyl-ACP_synthase_II [Bacillus_cereus]                  | CPTF_Mn         | 1179049.933 | 680602.3021 | 57.72463769 |
| UIJ67515.1 | beta-ketoacyl-ACP_synthase_II [Bacillus_cereus]                  | CPTF_Ni         | 397703.3333 | 78032.90765 | 19.62088349 |
| UIJ67515.1 | beta-ketoacyl-ACP_synthase_II [Bacillus_cereus]                  | CPTF_U          | 946898.3333 | 386583.3812 | 40.82628173 |
| UIJ67515.1 | beta-ketoacyl-ACP_synthase_II [Bacillus_cereus]                  | CPTF_metals_mix | 1770387.1   | 1148480.602 | 64.87172226 |
| UIJ67515.1 | beta-ketoacyl-ACP_synthase_II [Bacillus_cereus]                  | CPTF_zcontrol   | 1428678.933 | 102146.5569 | 7.149720943 |
| UIJ67518.1 | tryptophan--tRNA_ligase [Bacillus_cereus]                        | CPTF_AI         | 2013175.633 | 324618.5382 | 16.12470034 |
| UIJ67518.1 | tryptophan--tRNA_ligase [Bacillus_cereus]                        | CPTF_Cd         | 2425644.267 | 366371.1644 | 15.10407645 |
| UIJ67518.1 | tryptophan--tRNA_ligase [Bacillus_cereus]                        | CPTF_Co         | 2145668.633 | 721531.2213 | 33.62733695 |
| UIJ67518.1 | tryptophan--tRNA_ligase [Bacillus_cereus]                        | CPTF_Cu         | 1676894.733 | 299491.6773 | 17.85989731 |
| UIJ67518.1 | tryptophan--tRNA_ligase [Bacillus_cereus]                        | CPTF_Fe         | 2101624.933 | 322942.4669 | 15.36632259 |
| UIJ67518.1 | tryptophan--tRNA_ligase [Bacillus_cereus]                        | CPTF_Mn         | 2115083.1   | 415237.3732 | 19.63220137 |
| UIJ67518.1 | tryptophan--tRNA_ligase [Bacillus_cereus]                        | CPTF_Ni         | 2162498.467 | 664013.1873 | 30.70583339 |
| UIJ67518.1 | tryptophan--tRNA_ligase [Bacillus_cereus]                        | CPTF_U          | 1411255.667 | 415018.9252 | 29.40777741 |
| UIJ67518.1 | tryptophan--tRNA_ligase [Bacillus_cereus]                        | CPTF_metals_mix | 1472040.167 | 239952.2246 | 16.30065742 |
| UIJ67518.1 | tryptophan--tRNA_ligase [Bacillus_cereus]                        | CPTF_zcontrol   | 1643488.3   | 440597.3938 | 26.80867237 |
| UIJ67520.1 | ABC_transporter_permease [Bacillus_cereus]                       | CPTF_AI         | 920895.6667 | 143787.0746 | 15.61382899 |
| UIJ67520.1 | ABC_transporter_permease [Bacillus_cereus]                       | CPTF_Cd         | 802418.2667 | 88178.03759 | 10.98903667 |
| UIJ67520.1 | ABC_transporter_permease [Bacillus_cereus]                       | CPTF_Co         | 1037846.667 | 200583.1563 | 19.32685846 |
| UIJ67520.1 | ABC_transporter_permease [Bacillus_cereus]                       | CPTF_Cu         | 977234.9333 | 37971.05893 | 3.885560947 |
| UIJ67520.1 | ABC_transporter_permease [Bacillus_cereus]                       | CPTF_Fe         | 740850.7333 | 46988.92156 | 6.342562604 |
| UIJ67520.1 | ABC_transporter_permease [Bacillus_cereus]                       | CPTF_Mn         | 905119.6333 | 72764.60162 | 8.039224755 |
| UIJ67520.1 | ABC_transporter_permease [Bacillus_cereus]                       | CPTF_Ni         | 803334.6667 | 189259.8804 | 23.5592821  |
| UIJ67520.1 | ABC_transporter_permease [Bacillus_cereus]                       | CPTF_U          | 681086.3    | 206168.0345 | 30.27047153 |
| UIJ67520.1 | ABC_transporter_permease [Bacillus_cereus]                       | CPTF_metals_mix | 641880.1333 | 122003.906  | 19.00727249 |
| UIJ67520.1 | ABC_transporter_permease [Bacillus_cereus]                       | CPTF_zcontrol   | 712768.6667 | 115281.8671 | 16.17381242 |
| UIJ67521.1 | ABC_transporter_permease [Bacillus_cereus]                       | CPTF_AI         | 2794059.9   | 141765.0144 | 5.073800113 |
| UIJ67521.1 | ABC_transporter_permease [Bacillus_cereus]                       | CPTF_Cd         | 2843788.467 | 98398.42879 | 3.460117725 |
| UIJ67521.1 | ABC_transporter_permease [Bacillus_cereus]                       | CPTF_Co         | 2765156.333 | 138071.2007 | 4.993251162 |
| UIJ67521.1 | ABC_transporter_permease [Bacillus_cereus]                       | CPTF_Cu         | 2557659.967 | 219531.2161 | 8.5832839   |
| UIJ67521.1 | ABC_transporter_permease [Bacillus_cereus]                       | CPTF_Fe         | 2776243.7   | 119024.1737 | 4.282737956 |
| UIJ67521.1 | ABC_transporter_permease [Bacillus_cereus]                       | CPTF_Mn         | 2827242.533 | 417059.1805 | 14.75144688 |
| UIJ67521.1 | ABC_transporter_permease [Bacillus_cereus]                       | CPTF_Ni         | 2604235.8   | 286191.9386 | 10.9894787  |
| UIJ67521.1 | ABC_transporter_permease [Bacillus_cereus]                       | CPTF_U          | 2658577.3   | 479105.3057 | 18.02111624 |
| UIJ67521.1 | ABC_transporter_permease [Bacillus_cereus]                       | CPTF_metals_mix | 2057007.733 | 167315.2462 | 8.133914301 |
| UIJ67521.1 | ABC_transporter_permease [Bacillus_cereus]                       | CPTF_zcontrol   | 2726649.733 | 241303.4519 | 8.849814811 |
| UIJ67522.1 | ABC_transporter_ATP-binding_protein [Bacillus_cereus]            | CPTF_AI         | 3837562.467 | 1015698.617 | 26.46728557 |
| UIJ67522.1 | ABC_transporter_ATP-binding_protein [Bacillus_cereus]            | CPTF_Cd         | 5083541.167 | 1076958.569 | 21.18520405 |
| UIJ67522.1 | ABC_transporter_ATP-binding_protein [Bacillus_cereus]            | CPTF_Co         | 4430212.767 | 625901.2031 | 14.12801678 |
| UIJ67522.1 | ABC_transporter_ATP-binding_protein [Bacillus_cereus]            | CPTF_Cu         | 3295362.033 | 1020861.968 | 30.97875006 |
| UIJ67522.1 | ABC_transporter_ATP-binding_protein [Bacillus_cereus]            | CPTF_Fe         | 4054839.5   | 865683.4102 | 21.34938782 |
| UIJ67522.1 | ABC_transporter_ATP-binding_protein [Bacillus_cereus]            | CPTF_Mn         | 3015453.333 | 299349.3312 | 9.927175059 |
| UIJ67522.1 | ABC_transporter_ATP-binding_protein [Bacillus_cereus]            | CPTF_Ni         | 2683467.567 | 1133437.746 | 42.23780308 |
| UIJ67522.1 | ABC_transporter_ATP-binding_protein [Bacillus_cereus]            | CPTF_U          | 2980791.867 | 906848.0387 | 30.42305801 |
| UIJ67522.1 | ABC_transporter_ATP-binding_protein [Bacillus_cereus]            | CPTF_metals_mix | 3438490.767 | 539158.2633 | 15.68008466 |
| UIJ67522.1 | ABC_transporter_ATP-binding_protein [Bacillus_cereus]            | CPTF_zcontrol   | 2970559.433 | 731361.283  | 24.62032151 |
| UIJ67523.1 | ATP-binding_cassette_domain-containing_protein [Bacillus_cereus] | CPTF_AI         | 6422418.833 | 349396.6785 | 5.44026616  |
| UIJ67523.1 | ATP-binding_cassette_domain-containing_protein [Bacillus_cereus] | CPTF_Cd         | 6648492.133 | 745660.4889 | 11.21548276 |
| UIJ67523.1 | ATP-binding_cassette_domain-containing_protein [Bacillus_cereus] | CPTF_Co         | 5803713     | 426581.981  | 7.350156374 |
| UIJ67523.1 | ATP-binding_cassette_domain-containing_protein [Bacillus_cereus] | CPTF_Cu         | 5623925.033 | 579861.2834 | 10.31061545 |
| UIJ67523.1 | ATP-binding_cassette_domain-containing_protein [Bacillus_cereus] | CPTF_Fe         | 6886548.2   | 328145.7289 | 4.765024789 |
| UIJ67523.1 | ATP-binding_cassette_domain-containing_protein [Bacillus_cereus] | CPTF_Mn         | 6148985.867 | 1291220.709 | 20.9989214  |
| UIJ67523.1 | ATP-binding_cassette_domain-containing_protein [Bacillus_cereus] | CPTF_Ni         | 6272116.033 | 903801.6222 | 14.40983581 |
| UIJ67523.1 | ATP-binding_cassette_domain-containing_protein [Bacillus_cereus] | CPTF_U          | 6952509.6   | 374048.0602 | 5.380043779 |
| UIJ67523.1 | ATP-binding_cassette_domain-containing_protein [Bacillus_cereus] | CPTF_metals_mix | 4676561.733 | 313073.2187 | 6.694516968 |
| UIJ67523.1 | ATP-binding_cassette_domain-containing_protein [Bacillus_cereus] | CPTF_zcontrol   | 6349630.567 | 345367.4889 | 5.439174536 |
| UIJ67531.1 | oligoendopeptidase_F [Bacillus_cereus]                           | CPTF_AI         | 13980889.53 | 558229.7245 | 3.992805488 |
| UIJ67531.1 | oligoendopeptidase_F [Bacillus_cereus]                           | CPTF_Cd         | 12927149    | 304971.7595 | 2.359157147 |

|            |                                                   |                 |             |             |             |
|------------|---------------------------------------------------|-----------------|-------------|-------------|-------------|
| UIJ67531.1 | oligoendopeptidase_F_[Bacillus_cereus]            | CPTF_Co         | 13362775    | 188766.2634 | 1.412627717 |
| UIJ67531.1 | oligoendopeptidase_F_[Bacillus_cereus]            | CPTF_Cu         | 12592967.2  | 395144.9177 | 3.137822179 |
| UIJ67531.1 | oligoendopeptidase_F_[Bacillus_cereus]            | CPTF_Fe         | 12503553.96 | 861051.3993 | 6.88645326  |
| UIJ67531.1 | oligoendopeptidase_F_[Bacillus_cereus]            | CPTF_Mn         | 13424834.37 | 509862.4934 | 3.797905281 |
| UIJ67531.1 | oligoendopeptidase_F_[Bacillus_cereus]            | CPTF_Ni         | 11837751.07 | 882297.6947 | 7.453254336 |
| UIJ67531.1 | oligoendopeptidase_F_[Bacillus_cereus]            | CPTF_U          | 11806399.17 | 1639922.133 | 13.89011256 |
| UIJ67531.1 | oligoendopeptidase_F_[Bacillus_cereus]            | CPTF_metals_mix | 9834640.477 | 477563.4389 | 4.855931847 |
| UIJ67531.1 | oligoendopeptidase_F_[Bacillus_cereus]            | CPTF_zcontrol   | 12595082.63 | 583819.9692 | 4.635300825 |
| UIJ67546.1 | AAA_family_ATPase_[Bacillus_cereus]               | CPTF_Al         | 37432       | 64834.12583 | 173.2050808 |
| UIJ67546.1 | AAA_family_ATPase_[Bacillus_cereus]               | CPTF_Cd         | 86545.33333 | 77559.61414 | 89.61732673 |
| UIJ67546.1 | AAA_family_ATPase_[Bacillus_cereus]               | CPTF_Co         | 32450.43333 | 56205.79926 | 173.2050808 |
| UIJ67546.1 | AAA_family_ATPase_[Bacillus_cereus]               | CPTF_Cu         | 78603.5     | 15946.09958 | 20.28675515 |
| UIJ67546.1 | AAA_family_ATPase_[Bacillus_cereus]               | CPTF_Fe         | 106015.5667 | 32611.48728 | 30.76103661 |
| UIJ67546.1 | AAA_family_ATPase_[Bacillus_cereus]               | CPTF_Mn         | 0           | 0           | 0           |
| UIJ67546.1 | AAA_family_ATPase_[Bacillus_cereus]               | CPTF_Ni         | 0           | 0           | 0           |
| UIJ67546.1 | AAA_family_ATPase_[Bacillus_cereus]               | CPTF_U          | 0           | 0           | 0           |
| UIJ67546.1 | AAA_family_ATPase_[Bacillus_cereus]               | CPTF_metals_mix | 83160.66667 | 73281.54754 | 88.1204426  |
| UIJ67546.1 | AAA_family_ATPase_[Bacillus_cereus]               | CPTF_zcontrol   | 0           | 0           | 0           |
| UIJ67587.1 | NAD_kinase_[Bacillus_cereus]                      | CPTF_Al         | 108624.2333 | 43467.43379 | 40.01633195 |
| UIJ67587.1 | NAD_kinase_[Bacillus_cereus]                      | CPTF_Cd         | 0           | 0           | 0           |
| UIJ67587.1 | NAD_kinase_[Bacillus_cereus]                      | CPTF_Co         | 96189       | 86797.45309 | 90.2363608  |
| UIJ67587.1 | NAD_kinase_[Bacillus_cereus]                      | CPTF_Cu         | 219127      | 59115.25949 | 26.97762461 |
| UIJ67587.1 | NAD_kinase_[Bacillus_cereus]                      | CPTF_Fe         | 94197.33333 | 90652.90123 | 96.2372267  |
| UIJ67587.1 | NAD_kinase_[Bacillus_cereus]                      | CPTF_Mn         | 57494.66667 | 99583.68383 | 173.2050808 |
| UIJ67587.1 | NAD_kinase_[Bacillus_cereus]                      | CPTF_Ni         | 117253.1333 | 43956.91841 | 37.48890726 |
| UIJ67587.1 | NAD_kinase_[Bacillus_cereus]                      | CPTF_U          | 149254.6667 | 76771.83368 | 54.43680623 |
| UIJ67587.1 | NAD_kinase_[Bacillus_cereus]                      | CPTF_metals_mix | 65755.66667 | 57009.22364 | 86.69857144 |
| UIJ67587.1 | NAD_kinase_[Bacillus_cereus]                      | CPTF_zcontrol   | 156214.6667 | 45794.31057 | 29.31498786 |
| UIJ67605.1 | enoyl-ACP_reductase_Fabl_[Bacillus_cereus]        | CPTF_Al         | 19696437.67 | 416458.0668 | 2.114382681 |
| UIJ67605.1 | enoyl-ACP_reductase_Fabl_[Bacillus_cereus]        | CPTF_Cd         | 21536307    | 592554.406  | 2.751420687 |
| UIJ67605.1 | enoyl-ACP_reductase_Fabl_[Bacillus_cereus]        | CPTF_Co         | 18725769.07 | 938684.6163 | 5.012796073 |
| UIJ67605.1 | enoyl-ACP_reductase_Fabl_[Bacillus_cereus]        | CPTF_Cu         | 17268582.67 | 1666208.335 | 9.648784545 |
| UIJ67605.1 | enoyl-ACP_reductase_Fabl_[Bacillus_cereus]        | CPTF_Fe         | 21142397.03 | 1726959.236 | 8.168228195 |
| UIJ67605.1 | enoyl-ACP_reductase_Fabl_[Bacillus_cereus]        | CPTF_Mn         | 20435840.63 | 299918.9139 | 1.467612315 |
| UIJ67605.1 | enoyl-ACP_reductase_Fabl_[Bacillus_cereus]        | CPTF_Ni         | 17795415.33 | 354614.403  | 1.992729006 |
| UIJ67605.1 | enoyl-ACP_reductase_Fabl_[Bacillus_cereus]        | CPTF_U          | 18842615.67 | 409733.7114 | 2.174505486 |
| UIJ67605.1 | enoyl-ACP_reductase_Fabl_[Bacillus_cereus]        | CPTF_metals_mix | 16594219.27 | 1397834.091 | 8.423620713 |
| UIJ67605.1 | enoyl-ACP_reductase_Fabl_[Bacillus_cereus]        | CPTF_zcontrol   | 20020916.53 | 618968.384  | 3.091608633 |
| UIJ67612.1 | GNAT_family_N-acetyltransferase_[Bacillus_cereus] | CPTF_Al         | 0           | 0           | 0           |
| UIJ67612.1 | GNAT_family_N-acetyltransferase_[Bacillus_cereus] | CPTF_Cd         | 0           | 0           | 0           |
| UIJ67612.1 | GNAT_family_N-acetyltransferase_[Bacillus_cereus] | CPTF_Co         | 10024.06667 | 17362.19277 | 173.2050808 |
| UIJ67612.1 | GNAT_family_N-acetyltransferase_[Bacillus_cereus] | CPTF_Cu         | 47935.16667 | 26083.99674 | 54.41515814 |
| UIJ67612.1 | GNAT_family_N-acetyltransferase_[Bacillus_cereus] | CPTF_Fe         | 19399.4     | 33600.74644 | 173.2050808 |
| UIJ67612.1 | GNAT_family_N-acetyltransferase_[Bacillus_cereus] | CPTF_Mn         | 0           | 0           | 0           |
| UIJ67612.1 | GNAT_family_N-acetyltransferase_[Bacillus_cereus] | CPTF_Ni         | 0           | 0           | 0           |
| UIJ67612.1 | GNAT_family_N-acetyltransferase_[Bacillus_cereus] | CPTF_U          | 0           | 0           | 0           |
| UIJ67612.1 | GNAT_family_N-acetyltransferase_[Bacillus_cereus] | CPTF_metals_mix | 0           | 0           | 0           |
| UIJ67612.1 | GNAT_family_N-acetyltransferase_[Bacillus_cereus] | CPTF_zcontrol   | 0           | 0           | 0           |
| UIJ67613.1 | YjcG_family_protein_[Bacillus_cereus]             | CPTF_Al         | 7281787.033 | 416872.2787 | 5.724862273 |
| UIJ67613.1 | YjcG_family_protein_[Bacillus_cereus]             | CPTF_Cd         | 6777481.667 | 208216.3492 | 3.072178715 |
| UIJ67613.1 | YjcG_family_protein_[Bacillus_cereus]             | CPTF_Co         | 6845172.667 | 377178.0194 | 5.51013156  |
| UIJ67613.1 | YjcG_family_protein_[Bacillus_cereus]             | CPTF_Cu         | 7337644.133 | 527312.0346 | 7.18639423  |
| UIJ67613.1 | YjcG_family_protein_[Bacillus_cereus]             | CPTF_Fe         | 6496247.667 | 449426.323  | 6.918244902 |
| UIJ67613.1 | YjcG_family_protein_[Bacillus_cereus]             | CPTF_Mn         | 7628256.667 | 941069.0006 | 12.33661952 |
| UIJ67613.1 | YjcG_family_protein_[Bacillus_cereus]             | CPTF_Ni         | 7083835.667 | 515613.1102 | 7.278727718 |
| UIJ67613.1 | YjcG_family_protein_[Bacillus_cereus]             | CPTF_U          | 4531694.2   | 712253.8294 | 15.71716444 |
| UIJ67613.1 | YjcG_family_protein_[Bacillus_cereus]             | CPTF_metals_mix | 9474777.667 | 1131812.236 | 11.94552818 |
| UIJ67613.1 | YjcG_family_protein_[Bacillus_cereus]             | CPTF_zcontrol   | 7720455.333 | 541891.9098 | 7.018911274 |
| UIJ67614.1 | esterase_family_protein_[Bacillus_cereus]         | CPTF_Al         | 886776.6667 | 170657.0249 | 19.24464539 |
| UIJ67614.1 | esterase_family_protein_[Bacillus_cereus]         | CPTF_Cd         | 884993      | 92698.91301 | 10.4745363  |
| UIJ67614.1 | esterase_family_protein_[Bacillus_cereus]         | CPTF_Co         | 645123.2    | 128032.5673 | 19.84621965 |



|            |                                                                           |                 |             |             |             |
|------------|---------------------------------------------------------------------------|-----------------|-------------|-------------|-------------|
| UIJ67614.1 | esterase_family_protein_[Bacillus_cereus]                                 | CPTF_Cu         | 949177.6667 | 121042.6676 | 12.75237207 |
| UIJ67614.1 | esterase_family_protein_[Bacillus_cereus]                                 | CPTF_Fe         | 745197      | 155455.7133 | 20.86102243 |
| UIJ67614.1 | esterase_family_protein_[Bacillus_cereus]                                 | CPTF_Mn         | 712915.3333 | 105260.2652 | 14.76476382 |
| UIJ67614.1 | esterase_family_protein_[Bacillus_cereus]                                 | CPTF_Ni         | 664728.3333 | 304658.6213 | 45.83204989 |
| UIJ67614.1 | esterase_family_protein_[Bacillus_cereus]                                 | CPTF_U          | 568710      | 227850.2688 | 40.06440345 |
| UIJ67614.1 | esterase_family_protein_[Bacillus_cereus]                                 | CPTF_metals_mix | 760261.1667 | 95245.9432  | 12.52805558 |
| UIJ67614.1 | esterase_family_protein_[Bacillus_cereus]                                 | CPTF_zcontrol   | 677336      | 181515.8458 | 26.79849377 |
| UIJ67617.1 | sodium/proline_symporter_PutP_[Bacillus_cereus]                           | CPTF_Al         | 0           | 0           | 0           |
| UIJ67617.1 | sodium/proline_symporter_PutP_[Bacillus_cereus]                           | CPTF_Cd         | 24817.46667 | 42985.11318 | 173.2050808 |
| UIJ67617.1 | sodium/proline_symporter_PutP_[Bacillus_cereus]                           | CPTF_Co         | 65805.66667 | 113978.7581 | 173.2050808 |
| UIJ67617.1 | sodium/proline_symporter_PutP_[Bacillus_cereus]                           | CPTF_Cu         | 0           | 0           | 0           |
| UIJ67617.1 | sodium/proline_symporter_PutP_[Bacillus_cereus]                           | CPTF_Fe         | 0           | 0           | 0           |
| UIJ67617.1 | sodium/proline_symporter_PutP_[Bacillus_cereus]                           | CPTF_Mn         | 29198.93333 | 50574.03606 | 173.2050808 |
| UIJ67617.1 | sodium/proline_symporter_PutP_[Bacillus_cereus]                           | CPTF_Ni         | 0           | 0           | 0           |
| UIJ67617.1 | sodium/proline_symporter_PutP_[Bacillus_cereus]                           | CPTF_U          | 0           | 0           | 0           |
| UIJ67617.1 | sodium/proline_symporter_PutP_[Bacillus_cereus]                           | CPTF_metals_mix | 22090.5     | 38261.86836 | 173.2050808 |
| UIJ67617.1 | sodium/proline_symporter_PutP_[Bacillus_cereus]                           | CPTF_zcontrol   | 0           | 0           | 0           |
| UIJ67618.1 | anthranilate_synthase_component_I_[Bacillus_cereus]                       | CPTF_Al         | 441193.3667 | 94859.43466 | 21.50064843 |
| UIJ67618.1 | anthranilate_synthase_component_I_[Bacillus_cereus]                       | CPTF_Cd         | 345719.3333 | 67038.19728 | 19.39093097 |
| UIJ67618.1 | anthranilate_synthase_component_I_[Bacillus_cereus]                       | CPTF_Co         | 653930.6667 | 260818.4033 | 39.88471815 |
| UIJ67618.1 | anthranilate_synthase_component_I_[Bacillus_cereus]                       | CPTF_Cu         | 323728.8667 | 63589.84342 | 19.6429327  |
| UIJ67618.1 | anthranilate_synthase_component_I_[Bacillus_cereus]                       | CPTF_Fe         | 648190.1667 | 410096.2139 | 63.26788571 |
| UIJ67618.1 | anthranilate_synthase_component_I_[Bacillus_cereus]                       | CPTF_Mn         | 691640.8    | 338892.5739 | 48.99834912 |
| UIJ67618.1 | anthranilate_synthase_component_I_[Bacillus_cereus]                       | CPTF_Ni         | 536156.6667 | 48470.65658 | 9.040390541 |
| UIJ67618.1 | anthranilate_synthase_component_I_[Bacillus_cereus]                       | CPTF_U          | 381665.0333 | 311619.0444 | 81.64726061 |
| UIJ67618.1 | anthranilate_synthase_component_I_[Bacillus_cereus]                       | CPTF_metals_mix | 6327.56667  | 10959.66695 | 173.2050808 |
| UIJ67618.1 | anthranilate_synthase_component_I_[Bacillus_cereus]                       | CPTF_zcontrol   | 442873.8333 | 129143.2764 | 29.16028599 |
| UIJ67619.1 | aminodeoxychorismate/anthranilate_synthase_component_II_[Bacillus_cereus] | CPTF_Al         | 0           | 0           | 0           |
| UIJ67619.1 | aminodeoxychorismate/anthranilate_synthase_component_II_[Bacillus_cereus] | CPTF_Cd         | 67253       | 116485.613  | 173.2050808 |
| UIJ67619.1 | aminodeoxychorismate/anthranilate_synthase_component_II_[Bacillus_cereus] | CPTF_Co         | 149142.6    | 132365.5123 | 88.75097544 |
| UIJ67619.1 | aminodeoxychorismate/anthranilate_synthase_component_II_[Bacillus_cereus] | CPTF_Cu         | 0           | 0           | 0           |
| UIJ67619.1 | aminodeoxychorismate/anthranilate_synthase_component_II_[Bacillus_cereus] | CPTF_Fe         | 134117.4667 | 116389.1105 | 86.78147102 |
| UIJ67619.1 | aminodeoxychorismate/anthranilate_synthase_component_II_[Bacillus_cereus] | CPTF_Mn         | 57464.2     | 51825.53541 | 90.18751746 |
| UIJ67619.1 | aminodeoxychorismate/anthranilate_synthase_component_II_[Bacillus_cereus] | CPTF_Ni         | 142135.6667 | 123421.3508 | 86.83348357 |
| UIJ67619.1 | aminodeoxychorismate/anthranilate_synthase_component_II_[Bacillus_cereus] | CPTF_U          | 0           | 0           | 0           |
| UIJ67619.1 | aminodeoxychorismate/anthranilate_synthase_component_II_[Bacillus_cereus] | CPTF_metals_mix | 0           | 0           | 0           |
| UIJ67619.1 | aminodeoxychorismate/anthranilate_synthase_component_II_[Bacillus_cereus] | CPTF_zcontrol   | 0           | 0           | 0           |
| UIJ67620.1 | anthranilate_phosphoribosyltransferase_[Bacillus_cereus]                  | CPTF_Al         | 675660.4    | 50049.89716 | 7.40755225  |
| UIJ67620.1 | anthranilate_phosphoribosyltransferase_[Bacillus_cereus]                  | CPTF_Cd         | 470503.3333 | 308023.5874 | 65.46682362 |
| UIJ67620.1 | anthranilate_phosphoribosyltransferase_[Bacillus_cereus]                  | CPTF_Co         | 576298.8667 | 191298.5044 | 33.1943225  |
| UIJ67620.1 | anthranilate_phosphoribosyltransferase_[Bacillus_cereus]                  | CPTF_Cu         | 404618.6667 | 32178.77497 | 7.952864666 |
| UIJ67620.1 | anthranilate_phosphoribosyltransferase_[Bacillus_cereus]                  | CPTF_Fe         | 735860.7    | 102072.512  | 13.87117317 |
| UIJ67620.1 | anthranilate_phosphoribosyltransferase_[Bacillus_cereus]                  | CPTF_Mn         | 665636.3333 | 360821.8996 | 54.20706196 |
| UIJ67620.1 | anthranilate_phosphoribosyltransferase_[Bacillus_cereus]                  | CPTF_Ni         | 818089.1333 | 100936.9968 | 12.33814174 |
| UIJ67620.1 | anthranilate_phosphoribosyltransferase_[Bacillus_cereus]                  | CPTF_U          | 580112.4667 | 203261.5554 | 35.03830155 |
| UIJ67620.1 | anthranilate_phosphoribosyltransferase_[Bacillus_cereus]                  | CPTF_metals_mix | 0           | 0           | 0           |
| UIJ67620.1 | anthranilate_phosphoribosyltransferase_[Bacillus_cereus]                  | CPTF_zcontrol   | 426130.8667 | 263868.2713 | 61.92188643 |
| UIJ67621.1 | indole-3-glycerol_phosphate_synthase_TrpC_[Bacillus_cereus]               | CPTF_Al         | 1539731.333 | 113352.3142 | 7.361824217 |
| UIJ67621.1 | indole-3-glycerol_phosphate_synthase_TrpC_[Bacillus_cereus]               | CPTF_Cd         | 1716466     | 393747.0578 | 22.93940328 |
| UIJ67621.1 | indole-3-glycerol_phosphate_synthase_TrpC_[Bacillus_cereus]               | CPTF_Co         | 1834825.333 | 275224.335  | 15.00002916 |
| UIJ67621.1 | indole-3-glycerol_phosphate_synthase_TrpC_[Bacillus_cereus]               | CPTF_Cu         | 1185528     | 121601.0802 | 10.25712427 |
| UIJ67621.1 | indole-3-glycerol_phosphate_synthase_TrpC_[Bacillus_cereus]               | CPTF_Fe         | 1906484.4   | 460671.4676 | 24.16340085 |
| UIJ67621.1 | indole-3-glycerol_phosphate_synthase_TrpC_[Bacillus_cereus]               | CPTF_Mn         | 1816830.667 | 888241.02   | 48.88958758 |
| UIJ67621.1 | indole-3-glycerol_phosphate_synthase_TrpC_[Bacillus_cereus]               | CPTF_Ni         | 1213637.333 | 112019.2522 | 9.23004337  |
| UIJ67621.1 | indole-3-glycerol_phosphate_synthase_TrpC_[Bacillus_cereus]               | CPTF_U          | 1229406     | 475422.6783 | 38.67092549 |
| UIJ67621.1 | indole-3-glycerol_phosphate_synthase_TrpC_[Bacillus_cereus]               | CPTF_metals_mix | 73034.33333 | 126499.176  | 173.2050808 |
| UIJ67621.1 | indole-3-glycerol_phosphate_synthase_TrpC_[Bacillus_cereus]               | CPTF_zcontrol   | 1426286.933 | 303003.0557 | 21.24418647 |
| UIJ67623.1 | tryptophan_synthase_subunit_beta_[Bacillus_cereus]                        | CPTF_Al         | 2756100.067 | 143646.108  | 5.211933692 |
| UIJ67623.1 | tryptophan_synthase_subunit_beta_[Bacillus_cereus]                        | CPTF_Cd         | 1787125.3   | 628475.7313 | 35.16685323 |
| UIJ67623.1 | tryptophan_synthase_subunit_beta_[Bacillus_cereus]                        | CPTF_Co         | 2635192.633 | 359929.7849 | 13.65857586 |
| UIJ67623.1 | tryptophan_synthase_subunit_beta_[Bacillus_cereus]                        | CPTF_Cu         | 1291000.833 | 556498.4616 | 43.1059723  |

|            |                                                                                                         |                 |             |             |             |
|------------|---------------------------------------------------------------------------------------------------------|-----------------|-------------|-------------|-------------|
| UIJ67623.1 | tryptophan_synthase_subunit_beta_[Bacillus_cereus]                                                      | CPTF_Fe         | 2342316.2   | 393521.9637 | 16.80054827 |
| UIJ67623.1 | tryptophan_synthase_subunit_beta_[Bacillus_cereus]                                                      | CPTF_Mn         | 3053137.733 | 1382766.735 | 45.29002148 |
| UIJ67623.1 | tryptophan_synthase_subunit_beta_[Bacillus_cereus]                                                      | CPTF_Ni         | 2057307.333 | 145212.2934 | 7.058366589 |
| UIJ67623.1 | tryptophan_synthase_subunit_beta_[Bacillus_cereus]                                                      | CPTF_U          | 1960443.333 | 1170433.632 | 59.70249751 |
| UIJ67623.1 | tryptophan_synthase_subunit_beta_[Bacillus_cereus]                                                      | CPTF_metals_mix | 0           | 0           | 0           |
| UIJ67623.1 | tryptophan_synthase_subunit_beta_[Bacillus_cereus]                                                      | CPTF_zcontrol   | 1973408.387 | 355915.3623 | 18.03556551 |
| UIJ67624.1 | tryptophan_synthase_subunit_alpha_[Bacillus_cereus]                                                     | CPTF_Al         | 0           | 0           | 0           |
| UIJ67624.1 | tryptophan_synthase_subunit_alpha_[Bacillus_cereus]                                                     | CPTF_Cd         | 63496       | 109978.2981 | 173.2050808 |
| UIJ67624.1 | tryptophan_synthase_subunit_alpha_[Bacillus_cereus]                                                     | CPTF_Co         | 98476.33333 | 170566.0127 | 173.2050808 |
| UIJ67624.1 | tryptophan_synthase_subunit_alpha_[Bacillus_cereus]                                                     | CPTF_Cu         | 0           | 0           | 0           |
| UIJ67624.1 | tryptophan_synthase_subunit_alpha_[Bacillus_cereus]                                                     | CPTF_Fe         | 9747.833333 | 16883.7426  | 173.2050808 |
| UIJ67624.1 | tryptophan_synthase_subunit_alpha_[Bacillus_cereus]                                                     | CPTF_Mn         | 203992.6333 | 353325.6053 | 173.2050808 |
| UIJ67624.1 | tryptophan_synthase_subunit_alpha_[Bacillus_cereus]                                                     | CPTF_Ni         | 0           | 0           | 0           |
| UIJ67624.1 | tryptophan_synthase_subunit_alpha_[Bacillus_cereus]                                                     | CPTF_U          | 0           | 0           | 0           |
| UIJ67624.1 | tryptophan_synthase_subunit_alpha_[Bacillus_cereus]                                                     | CPTF_metals_mix | 6303.766667 | 10918.44415 | 173.2050808 |
| UIJ67624.1 | tryptophan_synthase_subunit_alpha_[Bacillus_cereus]                                                     | CPTF_zcontrol   | 11311.03333 | 19591.28442 | 173.2050808 |
| UIJ67632.1 | CoA-disulfide_reductase_[Bacillus_cereus]                                                               | CPTF_Al         | 21971.86667 | 38056.3894  | 173.2050808 |
| UIJ67632.1 | CoA-disulfide_reductase_[Bacillus_cereus]                                                               | CPTF_Cd         | 52489.66667 | 90914.76954 | 173.2050808 |
| UIJ67632.1 | CoA-disulfide_reductase_[Bacillus_cereus]                                                               | CPTF_Co         | 0           | 0           | 0           |
| UIJ67632.1 | CoA-disulfide_reductase_[Bacillus_cereus]                                                               | CPTF_Cu         | 39142.33333 | 67796.51006 | 173.2050808 |
| UIJ67632.1 | CoA-disulfide_reductase_[Bacillus_cereus]                                                               | CPTF_Fe         | 0           | 0           | 0           |
| UIJ67632.1 | CoA-disulfide_reductase_[Bacillus_cereus]                                                               | CPTF_Mn         | 41091.66667 | 71172.85443 | 173.2050808 |
| UIJ67632.1 | CoA-disulfide_reductase_[Bacillus_cereus]                                                               | CPTF_Ni         | 0           | 0           | 0           |
| UIJ67632.1 | CoA-disulfide_reductase_[Bacillus_cereus]                                                               | CPTF_U          | 0           | 0           | 0           |
| UIJ67632.1 | CoA-disulfide_reductase_[Bacillus_cereus]                                                               | CPTF_metals_mix | 99677.66667 | 88844.21819 | 89.13151879 |
| UIJ67632.1 | CoA-disulfide_reductase_[Bacillus_cereus]                                                               | CPTF_zcontrol   | 28655.93333 | 49633.53247 | 173.2050808 |
| UIJ67637.1 | 2-oxoglutarate_dehydrogenase_complex_dihydroliopoyllysine-residue_succinyltransferase_[Bacillus_cereus] | CPTF_Al         | 12022233.97 | 666064.3943 | 5.540271435 |
| UIJ67637.1 | 2-oxoglutarate_dehydrogenase_complex_dihydroliopoyllysine-residue_succinyltransferase_[Bacillus_cereus] | CPTF_Cd         | 13018343.4  | 400306.5395 | 3.074942235 |
| UIJ67637.1 | 2-oxoglutarate_dehydrogenase_complex_dihydroliopoyllysine-residue_succinyltransferase_[Bacillus_cereus] | CPTF_Co         | 11203277.77 | 1528315.187 | 13.64167897 |
| UIJ67637.1 | 2-oxoglutarate_dehydrogenase_complex_dihydroliopoyllysine-residue_succinyltransferase_[Bacillus_cereus] | CPTF_Cu         | 11945636.23 | 506465.8325 | 4.23975603  |
| UIJ67637.1 | 2-oxoglutarate_dehydrogenase_complex_dihydroliopoyllysine-residue_succinyltransferase_[Bacillus_cereus] | CPTF_Fe         | 11961036.43 | 600197.7108 | 5.017940662 |
| UIJ67637.1 | 2-oxoglutarate_dehydrogenase_complex_dihydroliopoyllysine-residue_succinyltransferase_[Bacillus_cereus] | CPTF_Mn         | 12601177.83 | 960561.7009 | 7.622792993 |
| UIJ67637.1 | 2-oxoglutarate_dehydrogenase_complex_dihydroliopoyllysine-residue_succinyltransferase_[Bacillus_cereus] | CPTF_Ni         | 13074994.57 | 874050.8871 | 6.6849044   |
| UIJ67637.1 | 2-oxoglutarate_dehydrogenase_complex_dihydroliopoyllysine-residue_succinyltransferase_[Bacillus_cereus] | CPTF_U          | 12984910.2  | 1243461.271 | 9.576202312 |
| UIJ67637.1 | 2-oxoglutarate_dehydrogenase_complex_dihydroliopoyllysine-residue_succinyltransferase_[Bacillus_cereus] | CPTF_metals_mix | 7006409.4   | 375179.703  | 5.354807028 |
| UIJ67637.1 | 2-oxoglutarate_dehydrogenase_complex_dihydroliopoyllysine-residue_succinyltransferase_[Bacillus_cereus] | CPTF_zcontrol   | 13322419.33 | 693431.1982 | 5.204994535 |
| UIJ67638.1 | 2-oxoglutarate_dehydrogenase_E1_component_[Bacillus_cereus]                                             | CPTF_Al         | 6119088.367 | 406077.8835 | 6.636248068 |
| UIJ67638.1 | 2-oxoglutarate_dehydrogenase_E1_component_[Bacillus_cereus]                                             | CPTF_Cd         | 7204866.367 | 565807.8792 | 7.853134957 |
| UIJ67638.1 | 2-oxoglutarate_dehydrogenase_E1_component_[Bacillus_cereus]                                             | CPTF_Co         | 6250535.567 | 1176874.696 | 18.82838171 |
| UIJ67638.1 | 2-oxoglutarate_dehydrogenase_E1_component_[Bacillus_cereus]                                             | CPTF_Cu         | 7290901.5   | 736239.6201 | 10.09806017 |
| UIJ67638.1 | 2-oxoglutarate_dehydrogenase_E1_component_[Bacillus_cereus]                                             | CPTF_Fe         | 6204595.7   | 369961.3488 | 5.962698726 |
| UIJ67638.1 | 2-oxoglutarate_dehydrogenase_E1_component_[Bacillus_cereus]                                             | CPTF_Mn         | 6358231.267 | 537235.0176 | 8.449441285 |
| UIJ67638.1 | 2-oxoglutarate_dehydrogenase_E1_component_[Bacillus_cereus]                                             | CPTF_Ni         | 6497231.3   | 117945.3231 | 1.815316673 |
| UIJ67638.1 | 2-oxoglutarate_dehydrogenase_E1_component_[Bacillus_cereus]                                             | CPTF_U          | 6302276.6   | 1224192.506 | 19.4246077  |
| UIJ67638.1 | 2-oxoglutarate_dehydrogenase_E1_component_[Bacillus_cereus]                                             | CPTF_metals_mix | 5967801.5   | 462768.0262 | 7.754413852 |
| UIJ67638.1 | 2-oxoglutarate_dehydrogenase_E1_component_[Bacillus_cereus]                                             | CPTF_zcontrol   | 6667679.567 | 470709.114  | 7.059564115 |
| UIJ67651.1 | CalY_family_protein_[Bacillus_cereus]                                                                   | CPTF_Al         | 5249391.867 | 755578.0698 | 14.39363052 |
| UIJ67651.1 | CalY_family_protein_[Bacillus_cereus]                                                                   | CPTF_Cd         | 5051204.333 | 155624.3856 | 3.080936255 |
| UIJ67651.1 | CalY_family_protein_[Bacillus_cereus]                                                                   | CPTF_Co         | 4625414.667 | 434173.1163 | 9.386685251 |
| UIJ67651.1 | CalY_family_protein_[Bacillus_cereus]                                                                   | CPTF_Cu         | 2720949.667 | 49070.01808 | 1.803415134 |
| UIJ67651.1 | CalY_family_protein_[Bacillus_cereus]                                                                   | CPTF_Fe         | 4870405.133 | 571980.8575 | 11.74400983 |
| UIJ67651.1 | CalY_family_protein_[Bacillus_cereus]                                                                   | CPTF_Mn         | 4907336.333 | 758854.2302 | 15.46366865 |
| UIJ67651.1 | CalY_family_protein_[Bacillus_cereus]                                                                   | CPTF_Ni         | 4697069.333 | 564870.6763 | 12.02602381 |
| UIJ67651.1 | CalY_family_protein_[Bacillus_cereus]                                                                   | CPTF_U          | 5127080     | 1328766.906 | 25.91664078 |
| UIJ67651.1 | CalY_family_protein_[Bacillus_cereus]                                                                   | CPTF_metals_mix | 1840579.367 | 333919.9639 | 18.14211166 |
| UIJ67651.1 | CalY_family_protein_[Bacillus_cereus]                                                                   | CPTF_zcontrol   | 5267728.867 | 812365.5583 | 15.42155223 |
| UIJ67653.1 | biofilm_matrix_protein_CalY_[Bacillus_cereus]                                                           | CPTF_Al         | 35641497.17 | 6667987.424 | 18.70849418 |
| UIJ67653.1 | biofilm_matrix_protein_CalY_[Bacillus_cereus]                                                           | CPTF_Cd         | 36723092.27 | 3632298.305 | 9.89104697  |
| UIJ67653.1 | biofilm_matrix_protein_CalY_[Bacillus_cereus]                                                           | CPTF_Co         | 35041585.87 | 1373154.041 | 3.918641256 |
| UIJ67653.1 | biofilm_matrix_protein_CalY_[Bacillus_cereus]                                                           | CPTF_Cu         | 26581220.73 | 1358941.894 | 5.112413414 |
| UIJ67653.1 | biofilm_matrix_protein_CalY_[Bacillus_cereus]                                                           | CPTF_Fe         | 34895957.23 | 2346979.28  | 6.725648086 |

|            |                                                                                        |                 |             |             |             |
|------------|----------------------------------------------------------------------------------------|-----------------|-------------|-------------|-------------|
| UIJ67653.1 | biofilm_matrix_protein_CaY_[Bacillus_cereus]                                           | CPTF_Mn         | 34710267.7  | 6114763.577 | 17.61658432 |
| UIJ67653.1 | biofilm_matrix_protein_CaY_[Bacillus_cereus]                                           | CPTF_Ni         | 36316393.3  | 4417567.317 | 12.16411355 |
| UIJ67653.1 | biofilm_matrix_protein_CaY_[Bacillus_cereus]                                           | CPTF_U          | 36494091.97 | 4300407.19  | 11.78384489 |
| UIJ67653.1 | biofilm_matrix_protein_CaY_[Bacillus_cereus]                                           | CPTF_metals_mix | 16470245.3  | 922379.263  | 5.600276415 |
| UIJ67653.1 | biofilm_matrix_protein_CaY_[Bacillus_cereus]                                           | CPTF_zcontrol   | 37127526.63 | 2499244.516 | 6.731513631 |
| UIJ67654.1 | helix-turn-helix_domain-containing_protein_[Bacillus_cereus]                           | CPTF_Al         | 23808.63333 | 41237.76259 | 173.2050808 |
| UIJ67654.1 | helix-turn-helix_domain-containing_protein_[Bacillus_cereus]                           | CPTF_Cd         | 0           | 0           | 0           |
| UIJ67654.1 | helix-turn-helix_domain-containing_protein_[Bacillus_cereus]                           | CPTF_Co         | 0           | 0           | 0           |
| UIJ67654.1 | helix-turn-helix_domain-containing_protein_[Bacillus_cereus]                           | CPTF_Cu         | 21363.26667 | 37002.26328 | 173.2050808 |
| UIJ67654.1 | helix-turn-helix_domain-containing_protein_[Bacillus_cereus]                           | CPTF_Fe         | 0           | 0           | 0           |
| UIJ67654.1 | helix-turn-helix_domain-containing_protein_[Bacillus_cereus]                           | CPTF_Mn         | 0           | 0           | 0           |
| UIJ67654.1 | helix-turn-helix_domain-containing_protein_[Bacillus_cereus]                           | CPTF_Ni         | 0           | 0           | 0           |
| UIJ67654.1 | helix-turn-helix_domain-containing_protein_[Bacillus_cereus]                           | CPTF_U          | 0           | 0           | 0           |
| UIJ67654.1 | helix-turn-helix_domain-containing_protein_[Bacillus_cereus]                           | CPTF_metals_mix | 173931.6667 | 55693.31091 | 32.02022494 |
| UIJ67654.1 | helix-turn-helix_domain-containing_protein_[Bacillus_cereus]                           | CPTF_zcontrol   | 0           | 0           | 0           |
| UIJ67656.1 | immune_inhibitor_A_[Bacillus_cereus]                                                   | CPTF_Al         | 5069264.9   | 962217.5331 | 18.98140168 |
| UIJ67656.1 | immune_inhibitor_A_[Bacillus_cereus]                                                   | CPTF_Cd         | 5729849.9   | 948896.0186 | 16.56057375 |
| UIJ67656.1 | immune_inhibitor_A_[Bacillus_cereus]                                                   | CPTF_Co         | 5390649.5   | 672241.3524 | 12.47050754 |
| UIJ67656.1 | immune_inhibitor_A_[Bacillus_cereus]                                                   | CPTF_Cu         | 2582947     | 179578.5181 | 6.952466236 |
| UIJ67656.1 | immune_inhibitor_A_[Bacillus_cereus]                                                   | CPTF_Fe         | 5577171.233 | 1211527.968 | 21.72298316 |
| UIJ67656.1 | immune_inhibitor_A_[Bacillus_cereus]                                                   | CPTF_Mn         | 5234831.333 | 762478.9746 | 14.56549268 |
| UIJ67656.1 | immune_inhibitor_A_[Bacillus_cereus]                                                   | CPTF_Ni         | 3696446.033 | 88208.38656 | 2.386302567 |
| UIJ67656.1 | immune_inhibitor_A_[Bacillus_cereus]                                                   | CPTF_U          | 4900171.667 | 1172490.152 | 23.92753217 |
| UIJ67656.1 | immune_inhibitor_A_[Bacillus_cereus]                                                   | CPTF_metals_mix | 1560263.667 | 364307.2714 | 23.34908383 |
| UIJ67656.1 | immune_inhibitor_A_[Bacillus_cereus]                                                   | CPTF_zcontrol   | 5125825.533 | 834454.4114 | 16.27941501 |
| UIJ67658.1 | spermidine/putrescine_ABC_transporter_ATP-binding_protein_PotA_[Bacillus_cereus]       | CPTF_Al         | 12346.5     | 21384.7653  | 173.2050808 |
| UIJ67658.1 | spermidine/putrescine_ABC_transporter_ATP-binding_protein_PotA_[Bacillus_cereus]       | CPTF_Cd         | 61931.8     | 54704.40522 | 88.33007473 |
| UIJ67658.1 | spermidine/putrescine_ABC_transporter_ATP-binding_protein_PotA_[Bacillus_cereus]       | CPTF_Co         | 56507.83333 | 49804.95244 | 88.13813856 |
| UIJ67658.1 | spermidine/putrescine_ABC_transporter_ATP-binding_protein_PotA_[Bacillus_cereus]       | CPTF_Cu         | 24845.03333 | 43032.86005 | 173.2050808 |
| UIJ67658.1 | spermidine/putrescine_ABC_transporter_ATP-binding_protein_PotA_[Bacillus_cereus]       | CPTF_Fe         | 38120.4     | 66026.4696  | 173.2050808 |
| UIJ67658.1 | spermidine/putrescine_ABC_transporter_ATP-binding_protein_PotA_[Bacillus_cereus]       | CPTF_Mn         | 0           | 0           | 0           |
| UIJ67658.1 | spermidine/putrescine_ABC_transporter_ATP-binding_protein_PotA_[Bacillus_cereus]       | CPTF_Ni         | 28680.46667 | 49676.02545 | 173.2050808 |
| UIJ67658.1 | spermidine/putrescine_ABC_transporter_ATP-binding_protein_PotA_[Bacillus_cereus]       | CPTF_U          | 42350.66667 | 73353.5064  | 173.2050808 |
| UIJ67658.1 | spermidine/putrescine_ABC_transporter_ATP-binding_protein_PotA_[Bacillus_cereus]       | CPTF_metals_mix | 66127.03333 | 60284.01904 | 91.1639552  |
| UIJ67658.1 | spermidine/putrescine_ABC_transporter_ATP-binding_protein_PotA_[Bacillus_cereus]       | CPTF_zcontrol   | 30697.03333 | 53168.82137 | 173.2050808 |
| UIJ67661.1 | spermidine/putrescine_ABC_transporter_substrate-binding_protein_PotD_[Bacillus_cereus] | CPTF_Al         | 1032053.3   | 499922.9    | 48.4396397  |
| UIJ67661.1 | spermidine/putrescine_ABC_transporter_substrate-binding_protein_PotD_[Bacillus_cereus] | CPTF_Cd         | 979452.8333 | 487521.3846 | 49.77487103 |
| UIJ67661.1 | spermidine/putrescine_ABC_transporter_substrate-binding_protein_PotD_[Bacillus_cereus] | CPTF_Co         | 1142834.6   | 535388.5582 | 46.84742291 |
| UIJ67661.1 | spermidine/putrescine_ABC_transporter_substrate-binding_protein_PotD_[Bacillus_cereus] | CPTF_Cu         | 774291.2667 | 314753.0745 | 40.65047458 |
| UIJ67661.1 | spermidine/putrescine_ABC_transporter_substrate-binding_protein_PotD_[Bacillus_cereus] | CPTF_Fe         | 593589      | 232700.631  | 39.20231523 |
| UIJ67661.1 | spermidine/putrescine_ABC_transporter_substrate-binding_protein_PotD_[Bacillus_cereus] | CPTF_Mn         | 517917.8667 | 119952.2648 | 23.16048016 |
| UIJ67661.1 | spermidine/putrescine_ABC_transporter_substrate-binding_protein_PotD_[Bacillus_cereus] | CPTF_Ni         | 1192630.833 | 370953.6576 | 31.10381245 |
| UIJ67661.1 | spermidine/putrescine_ABC_transporter_substrate-binding_protein_PotD_[Bacillus_cereus] | CPTF_U          | 905570.3333 | 466968.836  | 51.56626921 |
| UIJ67661.1 | spermidine/putrescine_ABC_transporter_substrate-binding_protein_PotD_[Bacillus_cereus] | CPTF_metals_mix | 1743743.833 | 382854.9006 | 21.95591424 |
| UIJ67661.1 | spermidine/putrescine_ABC_transporter_substrate-binding_protein_PotD_[Bacillus_cereus] | CPTF_zcontrol   | 1152055     | 220060.173  | 19.10153361 |
| UIJ67672.1 | response_regulator_transcription_factor_[Bacillus_cereus]                              | CPTF_Al         | 0           | 0           | 0           |
| UIJ67672.1 | response_regulator_transcription_factor_[Bacillus_cereus]                              | CPTF_Cd         | 0           | 0           | 0           |
| UIJ67672.1 | response_regulator_transcription_factor_[Bacillus_cereus]                              | CPTF_Co         | 0           | 0           | 0           |
| UIJ67672.1 | response_regulator_transcription_factor_[Bacillus_cereus]                              | CPTF_Cu         | 0           | 0           | 0           |
| UIJ67672.1 | response_regulator_transcription_factor_[Bacillus_cereus]                              | CPTF_Fe         | 0           | 0           | 0           |
| UIJ67672.1 | response_regulator_transcription_factor_[Bacillus_cereus]                              | CPTF_Mn         | 0           | 0           | 0           |
| UIJ67672.1 | response_regulator_transcription_factor_[Bacillus_cereus]                              | CPTF_Ni         | 0           | 0           | 0           |
| UIJ67672.1 | response_regulator_transcription_factor_[Bacillus_cereus]                              | CPTF_U          | 0           | 0           | 0           |
| UIJ67672.1 | response_regulator_transcription_factor_[Bacillus_cereus]                              | CPTF_metals_mix | 132890.4333 | 55708.26303 | 41.92044652 |
| UIJ67672.1 | response_regulator_transcription_factor_[Bacillus_cereus]                              | CPTF_zcontrol   | 0           | 0           | 0           |
| UIJ67675.1 | (Fe-S)-binding_protein_[Bacillus_cereus]                                               | CPTF_Al         | 15421.06667 | 26710.07097 | 173.2050808 |
| UIJ67675.1 | (Fe-S)-binding_protein_[Bacillus_cereus]                                               | CPTF_Cd         | 0           | 0           | 0           |
| UIJ67675.1 | (Fe-S)-binding_protein_[Bacillus_cereus]                                               | CPTF_Co         | 189961.6667 | 38508.60021 | 20.27177424 |
| UIJ67675.1 | (Fe-S)-binding_protein_[Bacillus_cereus]                                               | CPTF_Cu         | 65066.86667 | 57870.12171 | 88.93946286 |
| UIJ67675.1 | (Fe-S)-binding_protein_[Bacillus_cereus]                                               | CPTF_Fe         | 8587.9      | 14874.67913 | 173.2050808 |
| UIJ67675.1 | (Fe-S)-binding_protein_[Bacillus_cereus]                                               | CPTF_Mn         | 15302.06667 | 26503.95693 | 173.2050808 |

|            |                                                                            |                 |             |             |             |
|------------|----------------------------------------------------------------------------|-----------------|-------------|-------------|-------------|
| UIJ67675.1 | (Fe-S)-binding_protein_[Bacillus_cereus]                                   | CPTF_Ni         | 0           | 0           | 0           |
| UIJ67675.1 | (Fe-S)-binding_protein_[Bacillus_cereus]                                   | CPTF_U          | 21474.96667 | 37195.73336 | 173.2050808 |
| UIJ67675.1 | (Fe-S)-binding_protein_[Bacillus_cereus]                                   | CPTF_metals_mix | 287216.6667 | 60469.63528 | 21.05366516 |
| UIJ67675.1 | (Fe-S)-binding_protein_[Bacillus_cereus]                                   | CPTF_zcontrol   | 0           | 0           | 0           |
| UIJ67676.1 | LutB/LidF_family_L-lactate_oxidation_iron-sulfur_protein_[Bacillus_cereus] | CPTF_Al         | 552200.4    | 930258.2981 | 168.4638943 |
| UIJ67676.1 | LutB/LidF_family_L-lactate_oxidation_iron-sulfur_protein_[Bacillus_cereus] | CPTF_Cd         | 1060388     | 321277.002  | 30.2980609  |
| UIJ67676.1 | LutB/LidF_family_L-lactate_oxidation_iron-sulfur_protein_[Bacillus_cereus] | CPTF_Co         | 1230677.567 | 124306.0541 | 10.10061916 |
| UIJ67676.1 | LutB/LidF_family_L-lactate_oxidation_iron-sulfur_protein_[Bacillus_cereus] | CPTF_Cu         | 1263515.567 | 507495.7116 | 40.16537073 |
| UIJ67676.1 | LutB/LidF_family_L-lactate_oxidation_iron-sulfur_protein_[Bacillus_cereus] | CPTF_Fe         | 380934      | 336182.016  | 88.25203737 |
| UIJ67676.1 | LutB/LidF_family_L-lactate_oxidation_iron-sulfur_protein_[Bacillus_cereus] | CPTF_Mn         | 698666      | 228156.2308 | 32.65598023 |
| UIJ67676.1 | LutB/LidF_family_L-lactate_oxidation_iron-sulfur_protein_[Bacillus_cereus] | CPTF_Ni         | 775941      | 288944.2527 | 37.23791534 |
| UIJ67676.1 | LutB/LidF_family_L-lactate_oxidation_iron-sulfur_protein_[Bacillus_cereus] | CPTF_U          | 712243.6667 | 54969.61808 | 7.717810724 |
| UIJ67676.1 | LutB/LidF_family_L-lactate_oxidation_iron-sulfur_protein_[Bacillus_cereus] | CPTF_metals_mix | 1605452.633 | 138717.9286 | 8.640424872 |
| UIJ67676.1 | LutB/LidF_family_L-lactate_oxidation_iron-sulfur_protein_[Bacillus_cereus] | CPTF_zcontrol   | 630641.6667 | 413451.8239 | 65.56049906 |
| UIJ67677.1 | lactate_utilization_protein_C_[Bacillus_cereus]                            | CPTF_Al         | 1259286     | 73516.43158 | 5.837945596 |
| UIJ67677.1 | lactate_utilization_protein_C_[Bacillus_cereus]                            | CPTF_Cd         | 1281018.767 | 233731.3665 | 18.24574101 |
| UIJ67677.1 | lactate_utilization_protein_C_[Bacillus_cereus]                            | CPTF_Co         | 1626854     | 95362.67461 | 5.861784438 |
| UIJ67677.1 | lactate_utilization_protein_C_[Bacillus_cereus]                            | CPTF_Cu         | 1361152     | 91189.69985 | 6.699450161 |
| UIJ67677.1 | lactate_utilization_protein_C_[Bacillus_cereus]                            | CPTF_Fe         | 1322655.9   | 139285.3676 | 10.53073348 |
| UIJ67677.1 | lactate_utilization_protein_C_[Bacillus_cereus]                            | CPTF_Mn         | 943218.0333 | 278544.4967 | 29.53129466 |
| UIJ67677.1 | lactate_utilization_protein_C_[Bacillus_cereus]                            | CPTF_Ni         | 1318977     | 87806.18413 | 6.657142932 |
| UIJ67677.1 | lactate_utilization_protein_C_[Bacillus_cereus]                            | CPTF_U          | 1142672     | 154377.0866 | 13.51018373 |
| UIJ67677.1 | lactate_utilization_protein_C_[Bacillus_cereus]                            | CPTF_metals_mix | 1249006.333 | 468765.3446 | 37.53106226 |
| UIJ67677.1 | lactate_utilization_protein_C_[Bacillus_cereus]                            | CPTF_zcontrol   | 1219052.433 | 190988.1265 | 15.66693288 |
| UIJ67684.1 | MaoC_family_dehydratase_[Bacillus_cereus]                                  | CPTF_Al         | 85834.93333 | 17663.76293 | 20.57875768 |
| UIJ67684.1 | MaoC_family_dehydratase_[Bacillus_cereus]                                  | CPTF_Cd         | 80883.2     | 25077.56544 | 31.0046653  |
| UIJ67684.1 | MaoC_family_dehydratase_[Bacillus_cereus]                                  | CPTF_Co         | 69104.36667 | 35298.72579 | 51.08031156 |
| UIJ67684.1 | MaoC_family_dehydratase_[Bacillus_cereus]                                  | CPTF_Cu         | 86510.03333 | 7877.583522 | 9.10597675  |
| UIJ67684.1 | MaoC_family_dehydratase_[Bacillus_cereus]                                  | CPTF_Fe         | 27282.76667 | 47255.13804 | 173.2050808 |
| UIJ67684.1 | MaoC_family_dehydratase_[Bacillus_cereus]                                  | CPTF_Mn         | 51721.26667 | 28228.63767 | 54.57839587 |
| UIJ67684.1 | MaoC_family_dehydratase_[Bacillus_cereus]                                  | CPTF_Ni         | 82822.53333 | 18296.91316 | 22.09170913 |
| UIJ67684.1 | MaoC_family_dehydratase_[Bacillus_cereus]                                  | CPTF_U          | 84618.83333 | 21803.07855 | 25.76622448 |
| UIJ67684.1 | MaoC_family_dehydratase_[Bacillus_cereus]                                  | CPTF_metals_mix | 37858.23333 | 18844.33356 | 49.77605107 |
| UIJ67684.1 | MaoC_family_dehydratase_[Bacillus_cereus]                                  | CPTF_zcontrol   | 34425.43333 | 29942.98097 | 86.979242   |
| UIJ67685.1 | polyhydroxyalkanoic_acid_inclusion_protein_PhaP_[Bacillus_cereus]          | CPTF_Al         | 7384125.1   | 246573.9488 | 3.339243925 |
| UIJ67685.1 | polyhydroxyalkanoic_acid_inclusion_protein_PhaP_[Bacillus_cereus]          | CPTF_Cd         | 7297660.267 | 139286.3738 | 1.908644259 |
| UIJ67685.1 | polyhydroxyalkanoic_acid_inclusion_protein_PhaP_[Bacillus_cereus]          | CPTF_Co         | 7135724.9   | 448377.4604 | 6.283588667 |
| UIJ67685.1 | polyhydroxyalkanoic_acid_inclusion_protein_PhaP_[Bacillus_cereus]          | CPTF_Cu         | 6359177.467 | 648077.1461 | 10.19121025 |
| UIJ67685.1 | polyhydroxyalkanoic_acid_inclusion_protein_PhaP_[Bacillus_cereus]          | CPTF_Fe         | 7160958.733 | 259467.2927 | 3.623359698 |
| UIJ67685.1 | polyhydroxyalkanoic_acid_inclusion_protein_PhaP_[Bacillus_cereus]          | CPTF_Mn         | 6752814.733 | 318165.0979 | 4.711592283 |
| UIJ67685.1 | polyhydroxyalkanoic_acid_inclusion_protein_PhaP_[Bacillus_cereus]          | CPTF_Ni         | 5929544.667 | 640738.4642 | 10.80586285 |
| UIJ67685.1 | polyhydroxyalkanoic_acid_inclusion_protein_PhaP_[Bacillus_cereus]          | CPTF_U          | 6737100.233 | 365381.6737 | 5.423426415 |
| UIJ67685.1 | polyhydroxyalkanoic_acid_inclusion_protein_PhaP_[Bacillus_cereus]          | CPTF_metals_mix | 4378781.967 | 498402.2439 | 11.38221194 |
| UIJ67685.1 | polyhydroxyalkanoic_acid_inclusion_protein_PhaP_[Bacillus_cereus]          | CPTF_zcontrol   | 7023732     | 587095.8009 | 8.358744338 |
| UIJ67687.1 | polyhydroxyalkanoic_acid_synthase_subunit_PhaR_[Bacillus_cereus]           | CPTF_Al         | 18290767    | 1675295.677 | 9.159242349 |
| UIJ67687.1 | polyhydroxyalkanoic_acid_synthase_subunit_PhaR_[Bacillus_cereus]           | CPTF_Cd         | 18863186    | 933140.4767 | 4.946886898 |
| UIJ67687.1 | polyhydroxyalkanoic_acid_synthase_subunit_PhaR_[Bacillus_cereus]           | CPTF_Co         | 15700996.77 | 1771128.294 | 11.28035576 |
| UIJ67687.1 | polyhydroxyalkanoic_acid_synthase_subunit_PhaR_[Bacillus_cereus]           | CPTF_Cu         | 13147896.6  | 523118.9489 | 3.978727281 |
| UIJ67687.1 | polyhydroxyalkanoic_acid_synthase_subunit_PhaR_[Bacillus_cereus]           | CPTF_Fe         | 17137372    | 3189105.166 | 18.60906775 |
| UIJ67687.1 | polyhydroxyalkanoic_acid_synthase_subunit_PhaR_[Bacillus_cereus]           | CPTF_Mn         | 18132622.43 | 5553429.931 | 30.6267334  |
| UIJ67687.1 | polyhydroxyalkanoic_acid_synthase_subunit_PhaR_[Bacillus_cereus]           | CPTF_Ni         | 9601068     | 1968572.123 | 20.50367858 |
| UIJ67687.1 | polyhydroxyalkanoic_acid_synthase_subunit_PhaR_[Bacillus_cereus]           | CPTF_U          | 14421118.33 | 223829.5924 | 1.552095942 |
| UIJ67687.1 | polyhydroxyalkanoic_acid_synthase_subunit_PhaR_[Bacillus_cereus]           | CPTF_metals_mix | 11699327.13 | 1718732.193 | 14.69086362 |
| UIJ67687.1 | polyhydroxyalkanoic_acid_synthase_subunit_PhaR_[Bacillus_cereus]           | CPTF_zcontrol   | 16154267.27 | 2894979.769 | 17.92083616 |
| UIJ67688.1 | acetoacetyl-CoA_reductase_[Bacillus_cereus]                                | CPTF_Al         | 28871161.37 | 879886.9846 | 3.047632804 |
| UIJ67688.1 | acetoacetyl-CoA_reductase_[Bacillus_cereus]                                | CPTF_Cd         | 29769704.17 | 201508.384  | 0.676890784 |
| UIJ67688.1 | acetoacetyl-CoA_reductase_[Bacillus_cereus]                                | CPTF_Co         | 27476558.9  | 1827765.479 | 6.652090188 |
| UIJ67688.1 | acetoacetyl-CoA_reductase_[Bacillus_cereus]                                | CPTF_Cu         | 22580005    | 1528219.026 | 6.76801899  |
| UIJ67688.1 | acetoacetyl-CoA_reductase_[Bacillus_cereus]                                | CPTF_Fe         | 28619795    | 2551743.457 | 8.916008856 |
| UIJ67688.1 | acetoacetyl-CoA_reductase_[Bacillus_cereus]                                | CPTF_Mn         | 30567975.53 | 6227981.314 | 20.37420276 |
| UIJ67688.1 | acetoacetyl-CoA_reductase_[Bacillus_cereus]                                | CPTF_Ni         | 23863028.1  | 2088776.036 | 8.753189358 |

|            |                                                                                |                 |             |             |             |
|------------|--------------------------------------------------------------------------------|-----------------|-------------|-------------|-------------|
| UIJ67688.1 | acetoacetyl-CoA_reductase [Bacillus cereus]                                    | CPTF_U          | 21544907.57 | 752196.7212 | 3.491297045 |
| UIJ67688.1 | acetoacetyl-CoA_reductase [Bacillus cereus]                                    | CPTF_metals_mix | 20345201    | 2024946.901 | 9.952946157 |
| UIJ67688.1 | acetoacetyl-CoA_reductase [Bacillus cereus]                                    | CPTF_zcontrol   | 29381714.57 | 1590350.53  | 5.412722006 |
| UIJ67689.1 | class_III_poly(R)-hydroxyalkanoic_acid_synthase_subunit_PhaC [Bacillus cereus] | CPTF_Al         | 16291408.9  | 240450.9799 | 1.475937296 |
| UIJ67689.1 | class_III_poly(R)-hydroxyalkanoic_acid_synthase_subunit_PhaC [Bacillus cereus] | CPTF_Cd         | 14361344.8  | 1752952.902 | 12.20604983 |
| UIJ67689.1 | class_III_poly(R)-hydroxyalkanoic_acid_synthase_subunit_PhaC [Bacillus cereus] | CPTF_Co         | 14347322.53 | 1189476.503 | 8.290581743 |
| UIJ67689.1 | class_III_poly(R)-hydroxyalkanoic_acid_synthase_subunit_PhaC [Bacillus cereus] | CPTF_Cu         | 12145667.7  | 1418396.386 | 11.67820841 |
| UIJ67689.1 | class_III_poly(R)-hydroxyalkanoic_acid_synthase_subunit_PhaC [Bacillus cereus] | CPTF_Fe         | 15743153.1  | 749315.8394 | 4.75963001  |
| UIJ67689.1 | class_III_poly(R)-hydroxyalkanoic_acid_synthase_subunit_PhaC [Bacillus cereus] | CPTF_Mn         | 16502581.2  | 571807.6159 | 3.464958657 |
| UIJ67689.1 | class_III_poly(R)-hydroxyalkanoic_acid_synthase_subunit_PhaC [Bacillus cereus] | CPTF_Ni         | 12397156.8  | 1606865.892 | 12.96156786 |
| UIJ67689.1 | class_III_poly(R)-hydroxyalkanoic_acid_synthase_subunit_PhaC [Bacillus cereus] | CPTF_U          | 13723420    | 1446080.145 | 10.5373161  |
| UIJ67689.1 | class_III_poly(R)-hydroxyalkanoic_acid_synthase_subunit_PhaC [Bacillus cereus] | CPTF_metals_mix | 8390805.2   | 475377.271  | 5.665454741 |
| UIJ67689.1 | class_III_poly(R)-hydroxyalkanoic_acid_synthase_subunit_PhaC [Bacillus cereus] | CPTF_zcontrol   | 16390530.13 | 973321.4095 | 5.93831561  |
| UIJ67708.1 | MarR_family_transcriptional_regulator [Bacillus cereus]                        | CPTF_Al         | 123634.6667 | 42966.79948 | 34.7530354  |
| UIJ67708.1 | MarR_family_transcriptional_regulator [Bacillus cereus]                        | CPTF_Cd         | 128224.3333 | 112720.9659 | 87.9091846  |
| UIJ67708.1 | MarR_family_transcriptional_regulator [Bacillus cereus]                        | CPTF_Co         | 120521.5    | 31835.96479 | 26.41517471 |
| UIJ67708.1 | MarR_family_transcriptional_regulator [Bacillus cereus]                        | CPTF_Cu         | 66645.49667 | 61457.42708 | 92.21542362 |
| UIJ67708.1 | MarR_family_transcriptional_regulator [Bacillus cereus]                        | CPTF_Fe         | 96955.3     | 93259.81949 | 96.18846984 |
| UIJ67708.1 | MarR_family_transcriptional_regulator [Bacillus cereus]                        | CPTF_Mn         | 33191.73333 | 44150.75315 | 133.017317  |
| UIJ67708.1 | MarR_family_transcriptional_regulator [Bacillus cereus]                        | CPTF_Ni         | 86057.66667 | 149056.251  | 173.2050808 |
| UIJ67708.1 | MarR_family_transcriptional_regulator [Bacillus cereus]                        | CPTF_U          | 55903.66667 | 96827.991   | 173.2050808 |
| UIJ67708.1 | MarR_family_transcriptional_regulator [Bacillus cereus]                        | CPTF_metals_mix | 16578.76667 | 28715.26619 | 173.2050808 |
| UIJ67708.1 | MarR_family_transcriptional_regulator [Bacillus cereus]                        | CPTF_zcontrol   | 11780.36667 | 20404.1936  | 173.2050808 |
| UIJ67709.1 | M3_family_oligoendopeptidase [Bacillus cereus]                                 | CPTF_Al         | 5212984.333 | 558273.4727 | 10.70928737 |
| UIJ67709.1 | M3_family_oligoendopeptidase [Bacillus cereus]                                 | CPTF_Cd         | 5229323.633 | 453964.057  | 8.681123771 |
| UIJ67709.1 | M3_family_oligoendopeptidase [Bacillus cereus]                                 | CPTF_Co         | 5072547.5   | 467045.3951 | 9.207314373 |
| UIJ67709.1 | M3_family_oligoendopeptidase [Bacillus cereus]                                 | CPTF_Cu         | 5201599.467 | 419644.9269 | 8.067613233 |
| UIJ67709.1 | M3_family_oligoendopeptidase [Bacillus cereus]                                 | CPTF_Fe         | 4856084.5   | 515846.7545 | 10.62268901 |
| UIJ67709.1 | M3_family_oligoendopeptidase [Bacillus cereus]                                 | CPTF_Mn         | 5060971.9   | 613628.0499 | 12.12470771 |
| UIJ67709.1 | M3_family_oligoendopeptidase [Bacillus cereus]                                 | CPTF_Ni         | 4544523.933 | 193170.7217 | 4.250626128 |
| UIJ67709.1 | M3_family_oligoendopeptidase [Bacillus cereus]                                 | CPTF_U          | 3797368.667 | 526833.3852 | 13.87346334 |
| UIJ67709.1 | M3_family_oligoendopeptidase [Bacillus cereus]                                 | CPTF_metals_mix | 6104184.4   | 250539.5759 | 4.104390684 |
| UIJ67709.1 | M3_family_oligoendopeptidase [Bacillus cereus]                                 | CPTF_zcontrol   | 4677429.633 | 379122.0867 | 8.105350939 |
| UIJ67710.1 | DinB_family_protein [Bacillus cereus]                                          | CPTF_Al         | 6125970.367 | 762375.3493 | 12.44497286 |
| UIJ67710.1 | DinB_family_protein [Bacillus cereus]                                          | CPTF_Cd         | 5656736.333 | 231147.9714 | 4.086242628 |
| UIJ67710.1 | DinB_family_protein [Bacillus cereus]                                          | CPTF_Co         | 5465380.633 | 328417.6485 | 6.009053542 |
| UIJ67710.1 | DinB_family_protein [Bacillus cereus]                                          | CPTF_Cu         | 5211072.533 | 119604.8386 | 2.295205792 |
| UIJ67710.1 | DinB_family_protein [Bacillus cereus]                                          | CPTF_Fe         | 5985460.667 | 656502.8029 | 10.96829199 |
| UIJ67710.1 | DinB_family_protein [Bacillus cereus]                                          | CPTF_Mn         | 5978815.733 | 361504.7713 | 6.046427711 |
| UIJ67710.1 | DinB_family_protein [Bacillus cereus]                                          | CPTF_Ni         | 6069785.7   | 407835.5295 | 6.719109201 |
| UIJ67710.1 | DinB_family_protein [Bacillus cereus]                                          | CPTF_U          | 6033681.7   | 843196.325  | 13.97482279 |
| UIJ67710.1 | DinB_family_protein [Bacillus cereus]                                          | CPTF_metals_mix | 3784921.367 | 282831.4053 | 7.472583387 |
| UIJ67710.1 | DinB_family_protein [Bacillus cereus]                                          | CPTF_zcontrol   | 5538612.9   | 282815.8765 | 5.106258221 |
| UIJ67716.1 | preQ(1)_synthase [Bacillus cereus]                                             | CPTF_Al         | 70663.76667 | 61228.62855 | 86.64784151 |
| UIJ67716.1 | preQ(1)_synthase [Bacillus cereus]                                             | CPTF_Cd         | 50358.36667 | 72917.06038 | 144.7963173 |
| UIJ67716.1 | preQ(1)_synthase [Bacillus cereus]                                             | CPTF_Co         | 127177.7667 | 32191.18477 | 25.31195948 |
| UIJ67716.1 | preQ(1)_synthase [Bacillus cereus]                                             | CPTF_Cu         | 37217.53333 | 64462.65867 | 173.2050808 |
| UIJ67716.1 | preQ(1)_synthase [Bacillus cereus]                                             | CPTF_Fe         | 6933.366667 | 12008.94333 | 173.2050808 |
| UIJ67716.1 | preQ(1)_synthase [Bacillus cereus]                                             | CPTF_Mn         | 31433.93333 | 30229.46767 | 96.16826298 |
| UIJ67716.1 | preQ(1)_synthase [Bacillus cereus]                                             | CPTF_Ni         | 8372.066667 | 14500.84483 | 173.2050808 |
| UIJ67716.1 | preQ(1)_synthase [Bacillus cereus]                                             | CPTF_U          | 18991.6     | 32894.41612 | 173.2050808 |
| UIJ67716.1 | preQ(1)_synthase [Bacillus cereus]                                             | CPTF_metals_mix | 490238.5667 | 57330.68988 | 11.69444711 |
| UIJ67716.1 | preQ(1)_synthase [Bacillus cereus]                                             | CPTF_zcontrol   | 72271.4     | 62757.1018  | 86.83532047 |
| UIJ67720.1 | abortive_phage_infection_protein [Bacillus cereus]                             | CPTF_Al         | 0           | 0           | 0           |
| UIJ67720.1 | abortive_phage_infection_protein [Bacillus cereus]                             | CPTF_Cd         | 26534.53333 | 23294.13758 | 87.78800548 |
| UIJ67720.1 | abortive_phage_infection_protein [Bacillus cereus]                             | CPTF_Co         | 24483.7     | 6018.307948 | 24.58087605 |
| UIJ67720.1 | abortive_phage_infection_protein [Bacillus cereus]                             | CPTF_Cu         | 59539.3     | 8183.401911 | 13.74453833 |
| UIJ67720.1 | abortive_phage_infection_protein [Bacillus cereus]                             | CPTF_Fe         | 0           | 0           | 0           |
| UIJ67720.1 | abortive_phage_infection_protein [Bacillus cereus]                             | CPTF_Mn         | 0           | 0           | 0           |
| UIJ67720.1 | abortive_phage_infection_protein [Bacillus cereus]                             | CPTF_Ni         | 46117.96667 | 3274.163909 | 7.099540907 |
| UIJ67720.1 | abortive_phage_infection_protein [Bacillus cereus]                             | CPTF_U          | 11045.86667 | 19132.00228 | 173.2050808 |

|            |                                                                               |                 |             |             |             |
|------------|-------------------------------------------------------------------------------|-----------------|-------------|-------------|-------------|
| UIJ67720.1 | abortive_phage_infection_protein [Bacillus cereus]                            | CPTF_metals_mix | 15981.5     | 27680.76998 | 173.2050808 |
| UIJ67720.1 | abortive_phage_infection_protein [Bacillus cereus]                            | CPTF_zcontrol   | 0           | 0           | 0           |
| UIJ67723.1 | class_1b_ribonucleoside-diphosphate_reductase_subunit_alpha [Bacillus cereus] | CPTF_Al         | 4882847.533 | 201794.3428 | 4.132718488 |
| UIJ67723.1 | class_1b_ribonucleoside-diphosphate_reductase_subunit_alpha [Bacillus cereus] | CPTF_Cd         | 4118208.267 | 794415.5919 | 19.29032095 |
| UIJ67723.1 | class_1b_ribonucleoside-diphosphate_reductase_subunit_alpha [Bacillus cereus] | CPTF_Co         | 4408719.6   | 166854.6429 | 3.784650829 |
| UIJ67723.1 | class_1b_ribonucleoside-diphosphate_reductase_subunit_alpha [Bacillus cereus] | CPTF_Cu         | 4482157.867 | 393687.0405 | 8.783426471 |
| UIJ67723.1 | class_1b_ribonucleoside-diphosphate_reductase_subunit_alpha [Bacillus cereus] | CPTF_Fe         | 4645628.333 | 423026.7914 | 9.105911214 |
| UIJ67723.1 | class_1b_ribonucleoside-diphosphate_reductase_subunit_alpha [Bacillus cereus] | CPTF_Mn         | 4680979.567 | 691206.3812 | 14.7662764  |
| UIJ67723.1 | class_1b_ribonucleoside-diphosphate_reductase_subunit_alpha [Bacillus cereus] | CPTF_Ni         | 4080371.667 | 957998.8955 | 23.47822634 |
| UIJ67723.1 | class_1b_ribonucleoside-diphosphate_reductase_subunit_alpha [Bacillus cereus] | CPTF_U          | 4303245.633 | 504443.7433 | 11.72240179 |
| UIJ67723.1 | class_1b_ribonucleoside-diphosphate_reductase_subunit_alpha [Bacillus cereus] | CPTF_metals_mix | 4644574.5   | 124695.6058 | 2.684758438 |
| UIJ67723.1 | class_1b_ribonucleoside-diphosphate_reductase_subunit_alpha [Bacillus cereus] | CPTF_zcontrol   | 4781112.1   | 483089.1183 | 10.10411612 |
| UIJ67724.1 | class_1b_ribonucleoside-diphosphate_reductase_subunit_beta [Bacillus cereus]  | CPTF_Al         | 770905.1    | 88127.86364 | 11.43173961 |
| UIJ67724.1 | class_1b_ribonucleoside-diphosphate_reductase_subunit_beta [Bacillus cereus]  | CPTF_Cd         | 939286.4667 | 258478.0716 | 27.51855592 |
| UIJ67724.1 | class_1b_ribonucleoside-diphosphate_reductase_subunit_beta [Bacillus cereus]  | CPTF_Co         | 703410.9    | 144436.2371 | 20.53369333 |
| UIJ67724.1 | class_1b_ribonucleoside-diphosphate_reductase_subunit_beta [Bacillus cereus]  | CPTF_Cu         | 809593.5333 | 55143.07401 | 6.811204851 |
| UIJ67724.1 | class_1b_ribonucleoside-diphosphate_reductase_subunit_beta [Bacillus cereus]  | CPTF_Fe         | 800743.0667 | 132058.7967 | 16.49203124 |
| UIJ67724.1 | class_1b_ribonucleoside-diphosphate_reductase_subunit_beta [Bacillus cereus]  | CPTF_Mn         | 885195.5333 | 358296.2302 | 40.47650679 |
| UIJ67724.1 | class_1b_ribonucleoside-diphosphate_reductase_subunit_beta [Bacillus cereus]  | CPTF_Ni         | 715442.1    | 33752.33258 | 4.717688906 |
| UIJ67724.1 | class_1b_ribonucleoside-diphosphate_reductase_subunit_beta [Bacillus cereus]  | CPTF_U          | 798555.9667 | 183981.9133 | 23.03932611 |
| UIJ67724.1 | class_1b_ribonucleoside-diphosphate_reductase_subunit_beta [Bacillus cereus]  | CPTF_metals_mix | 1406936.867 | 96584.41867 | 6.86487226  |
| UIJ67724.1 | class_1b_ribonucleoside-diphosphate_reductase_subunit_beta [Bacillus cereus]  | CPTF_zcontrol   | 711989.6667 | 11354.8492  | 1.594805336 |
| UIJ67731.1 | DUF3913_family_protein [Bacillus cereus]                                      | CPTF_Al         | 0           | 0           | 0           |
| UIJ67731.1 | DUF3913_family_protein [Bacillus cereus]                                      | CPTF_Cd         | 272964.3333 | 75250.15714 | 27.56776177 |
| UIJ67731.1 | DUF3913_family_protein [Bacillus cereus]                                      | CPTF_Co         | 25998.53333 | 45030.78066 | 173.2050808 |
| UIJ67731.1 | DUF3913_family_protein [Bacillus cereus]                                      | CPTF_Cu         | 0           | 0           | 0           |
| UIJ67731.1 | DUF3913_family_protein [Bacillus cereus]                                      | CPTF_Fe         | 62005       | 107395.8103 | 173.2050808 |
| UIJ67731.1 | DUF3913_family_protein [Bacillus cereus]                                      | CPTF_Mn         | 114924.3333 | 199054.7844 | 173.2050808 |
| UIJ67731.1 | DUF3913_family_protein [Bacillus cereus]                                      | CPTF_Ni         | 0           | 0           | 0           |
| UIJ67731.1 | DUF3913_family_protein [Bacillus cereus]                                      | CPTF_U          | 0           | 0           | 0           |
| UIJ67731.1 | DUF3913_family_protein [Bacillus cereus]                                      | CPTF_metals_mix | 1058979.333 | 212312.8948 | 20.04882325 |
| UIJ67731.1 | DUF3913_family_protein [Bacillus cereus]                                      | CPTF_zcontrol   | 0           | 0           | 0           |
| UIJ67737.1 | D-alanyl-lipoteichoic_acid_biosynthesis_protein_DltD [Bacillus cereus]        | CPTF_Al         | 0           | 0           | 0           |
| UIJ67737.1 | D-alanyl-lipoteichoic_acid_biosynthesis_protein_DltD [Bacillus cereus]        | CPTF_Cd         | 0           | 0           | 0           |
| UIJ67737.1 | D-alanyl-lipoteichoic_acid_biosynthesis_protein_DltD [Bacillus cereus]        | CPTF_Co         | 4592.466667 | 7954.385599 | 173.2050808 |
| UIJ67737.1 | D-alanyl-lipoteichoic_acid_biosynthesis_protein_DltD [Bacillus cereus]        | CPTF_Cu         | 4518.266667 | 7825.867429 | 173.2050808 |
| UIJ67737.1 | D-alanyl-lipoteichoic_acid_biosynthesis_protein_DltD [Bacillus cereus]        | CPTF_Fe         | 0           | 0           | 0           |
| UIJ67737.1 | D-alanyl-lipoteichoic_acid_biosynthesis_protein_DltD [Bacillus cereus]        | CPTF_Mn         | 0           | 0           | 0           |
| UIJ67737.1 | D-alanyl-lipoteichoic_acid_biosynthesis_protein_DltD [Bacillus cereus]        | CPTF_Ni         | 0           | 0           | 0           |
| UIJ67737.1 | D-alanyl-lipoteichoic_acid_biosynthesis_protein_DltD [Bacillus cereus]        | CPTF_U          | 0           | 0           | 0           |
| UIJ67737.1 | D-alanyl-lipoteichoic_acid_biosynthesis_protein_DltD [Bacillus cereus]        | CPTF_metals_mix | 10091.23333 | 17478.52884 | 173.2050808 |
| UIJ67737.1 | D-alanyl-lipoteichoic_acid_biosynthesis_protein_DltD [Bacillus cereus]        | CPTF_zcontrol   | 0           | 0           | 0           |
| UIJ67738.1 | D-alanine--poly(phosphoribitol)_ligase_subunit_DltC [Bacillus cereus]         | CPTF_Al         | 48234.33333 | 16137.84848 | 33.45718156 |
| UIJ67738.1 | D-alanine--poly(phosphoribitol)_ligase_subunit_DltC [Bacillus cereus]         | CPTF_Cd         | 102935.0333 | 23607.0503  | 22.93393176 |
| UIJ67738.1 | D-alanine--poly(phosphoribitol)_ligase_subunit_DltC [Bacillus cereus]         | CPTF_Co         | 79292.03333 | 14446.34422 | 18.21916228 |
| UIJ67738.1 | D-alanine--poly(phosphoribitol)_ligase_subunit_DltC [Bacillus cereus]         | CPTF_Cu         | 71313.23333 | 12935.94218 | 18.13960969 |
| UIJ67738.1 | D-alanine--poly(phosphoribitol)_ligase_subunit_DltC [Bacillus cereus]         | CPTF_Fe         | 91559.86667 | 10442.16798 | 11.40474354 |
| UIJ67738.1 | D-alanine--poly(phosphoribitol)_ligase_subunit_DltC [Bacillus cereus]         | CPTF_Mn         | 19839.4     | 34362.84879 | 173.2050808 |
| UIJ67738.1 | D-alanine--poly(phosphoribitol)_ligase_subunit_DltC [Bacillus cereus]         | CPTF_Ni         | 77460.96667 | 25858.23495 | 33.38227764 |
| UIJ67738.1 | D-alanine--poly(phosphoribitol)_ligase_subunit_DltC [Bacillus cereus]         | CPTF_U          | 0           | 0           | 0           |
| UIJ67738.1 | D-alanine--poly(phosphoribitol)_ligase_subunit_DltC [Bacillus cereus]         | CPTF_metals_mix | 128724.4333 | 84552.68257 | 65.68502993 |
| UIJ67738.1 | D-alanine--poly(phosphoribitol)_ligase_subunit_DltC [Bacillus cereus]         | CPTF_zcontrol   | 47546.96667 | 44865.56209 | 94.36051391 |
| UIJ67740.1 | D-alanine--poly(phosphoribitol)_ligase_subunit_DltA [Bacillus cereus]         | CPTF_Al         | 1322994     | 33794.58763 | 2.554402184 |
| UIJ67740.1 | D-alanine--poly(phosphoribitol)_ligase_subunit_DltA [Bacillus cereus]         | CPTF_Cd         | 1359897.467 | 104476.5962 | 7.682681875 |
| UIJ67740.1 | D-alanine--poly(phosphoribitol)_ligase_subunit_DltA [Bacillus cereus]         | CPTF_Co         | 1435052.667 | 62742.76843 | 4.372157893 |
| UIJ67740.1 | D-alanine--poly(phosphoribitol)_ligase_subunit_DltA [Bacillus cereus]         | CPTF_Cu         | 1367889.667 | 65615.44639 | 4.796837639 |
| UIJ67740.1 | D-alanine--poly(phosphoribitol)_ligase_subunit_DltA [Bacillus cereus]         | CPTF_Fe         | 1244711.267 | 33529.4816  | 2.693755773 |
| UIJ67740.1 | D-alanine--poly(phosphoribitol)_ligase_subunit_DltA [Bacillus cereus]         | CPTF_Mn         | 1138881.333 | 121989.8273 | 10.71137297 |
| UIJ67740.1 | D-alanine--poly(phosphoribitol)_ligase_subunit_DltA [Bacillus cereus]         | CPTF_Ni         | 1345467.867 | 86810.8234  | 6.452091912 |
| UIJ67740.1 | D-alanine--poly(phosphoribitol)_ligase_subunit_DltA [Bacillus cereus]         | CPTF_U          | 1352198.4   | 36886.80247 | 2.727913483 |
| UIJ67740.1 | D-alanine--poly(phosphoribitol)_ligase_subunit_DltA [Bacillus cereus]         | CPTF_metals_mix | 1627772.267 | 94979.57175 | 5.834942252 |

|            |                                                                       |                 |             |             |             |
|------------|-----------------------------------------------------------------------|-----------------|-------------|-------------|-------------|
| UIJ67740.1 | D-alanine--poly(phosphoribitol)_ligase_subunit_DltA_[Bacillus_cereus] | CPTF_zcontrol   | 1343423.333 | 39536.49297 | 2.942966077 |
| UIJ67752.1 | bacitracin_resistance_undecaprenyl-diphosphatase_[Bacillus_cereus]    | CPTF_Al         | 380288.3333 | 45240.45647 | 11.89635666 |
| UIJ67752.1 | bacitracin_resistance_undecaprenyl-diphosphatase_[Bacillus_cereus]    | CPTF_Cd         | 217691.3333 | 201711.7183 | 92.65950792 |
| UIJ67752.1 | bacitracin_resistance_undecaprenyl-diphosphatase_[Bacillus_cereus]    | CPTF_Co         | 449322.3333 | 40708.88042 | 9.060061654 |
| UIJ67752.1 | bacitracin_resistance_undecaprenyl-diphosphatase_[Bacillus_cereus]    | CPTF_Cu         | 554252.6667 | 86465.34817 | 15.60034861 |
| UIJ67752.1 | bacitracin_resistance_undecaprenyl-diphosphatase_[Bacillus_cereus]    | CPTF_Fe         | 136324.6667 | 236121.249  | 173.2050808 |
| UIJ67752.1 | bacitracin_resistance_undecaprenyl-diphosphatase_[Bacillus_cereus]    | CPTF_Mn         | 121306.3333 | 210108.7326 | 173.2050808 |
| UIJ67752.1 | bacitracin_resistance_undecaprenyl-diphosphatase_[Bacillus_cereus]    | CPTF_Ni         | 382497      | 141976.0208 | 37.11820505 |
| UIJ67752.1 | bacitracin_resistance_undecaprenyl-diphosphatase_[Bacillus_cereus]    | CPTF_U          | 77610.33333 | 134425.0405 | 173.2050808 |
| UIJ67752.1 | bacitracin_resistance_undecaprenyl-diphosphatase_[Bacillus_cereus]    | CPTF_metals_mix | 523785.6667 | 25387.61181 | 4.846946647 |
| UIJ67752.1 | bacitracin_resistance_undecaprenyl-diphosphatase_[Bacillus_cereus]    | CPTF_zcontrol   | 250641.3333 | 217111.3923 | 86.62234172 |
| UIJ67753.1 | thioredoxin_family_protein_[Bacillus_cereus]                          | CPTF_Al         | 193349.4333 | 21038.27264 | 10.88095904 |
| UIJ67753.1 | thioredoxin_family_protein_[Bacillus_cereus]                          | CPTF_Cd         | 143144.2667 | 160505.4195 | 112.1284305 |
| UIJ67753.1 | thioredoxin_family_protein_[Bacillus_cereus]                          | CPTF_Co         | 102388.9333 | 74703.73908 | 72.96075527 |
| UIJ67753.1 | thioredoxin_family_protein_[Bacillus_cereus]                          | CPTF_Cu         | 225145.5667 | 6028.108971 | 2.677427346 |
| UIJ67753.1 | thioredoxin_family_protein_[Bacillus_cereus]                          | CPTF_Fe         | 140042.1667 | 67084.09082 | 47.90277987 |
| UIJ67753.1 | thioredoxin_family_protein_[Bacillus_cereus]                          | CPTF_Mn         | 146394.9333 | 55160.46136 | 37.67921478 |
| UIJ67753.1 | thioredoxin_family_protein_[Bacillus_cereus]                          | CPTF_Ni         | 156731.4    | 53868.40704 | 34.36988825 |
| UIJ67753.1 | thioredoxin_family_protein_[Bacillus_cereus]                          | CPTF_U          | 36160.66667 | 62632.1119  | 173.2050808 |
| UIJ67753.1 | thioredoxin_family_protein_[Bacillus_cereus]                          | CPTF_metals_mix | 1449857.4   | 79402.61682 | 5.476581133 |
| UIJ67753.1 | thioredoxin_family_protein_[Bacillus_cereus]                          | CPTF_zcontrol   | 105145.9    | 95624.61485 | 90.94469195 |
| UIJ67763.1 | branched-chain-amino-acid_transaminase_[Bacillus_cereus]              | CPTF_Al         | 27729278.6  | 4241657.005 | 15.29667276 |
| UIJ67763.1 | branched-chain-amino-acid_transaminase_[Bacillus_cereus]              | CPTF_Cd         | 30725976    | 5161544.31  | 16.79863419 |
| UIJ67763.1 | branched-chain-amino-acid_transaminase_[Bacillus_cereus]              | CPTF_Co         | 29559500.3  | 2545869.001 | 8.61269296  |
| UIJ67763.1 | branched-chain-amino-acid_transaminase_[Bacillus_cereus]              | CPTF_Cu         | 30722426.27 | 430451.2371 | 1.401097795 |
| UIJ67763.1 | branched-chain-amino-acid_transaminase_[Bacillus_cereus]              | CPTF_Fe         | 29677495.67 | 3823835.882 | 12.88463126 |
| UIJ67763.1 | branched-chain-amino-acid_transaminase_[Bacillus_cereus]              | CPTF_Mn         | 27013824.37 | 4051696.67  | 14.99860447 |
| UIJ67763.1 | branched-chain-amino-acid_transaminase_[Bacillus_cereus]              | CPTF_Ni         | 25524185.47 | 1238857.793 | 3.4856624   |
| UIJ67763.1 | branched-chain-amino-acid_transaminase_[Bacillus_cereus]              | CPTF_U          | 24202741.9  | 730182.73   | 3.016942184 |
| UIJ67763.1 | branched-chain-amino-acid_transaminase_[Bacillus_cereus]              | CPTF_metals_mix | 37798559.03 | 6073737.039 | 16.06869996 |
| UIJ67763.1 | branched-chain-amino-acid_transaminase_[Bacillus_cereus]              | CPTF_zcontrol   | 27487237.67 | 399958.3188 | 1.455069162 |
| UIJ67764.1 | acetolactate_synthase_large_subunit_[Bacillus_cereus]                 | CPTF_Al         | 5217765.767 | 938315.9636 | 17.98309862 |
| UIJ67764.1 | acetolactate_synthase_large_subunit_[Bacillus_cereus]                 | CPTF_Cd         | 5109143.367 | 148246.3075 | 2.901588325 |
| UIJ67764.1 | acetolactate_synthase_large_subunit_[Bacillus_cereus]                 | CPTF_Co         | 5490990.367 | 472451.5963 | 8.604123569 |
| UIJ67764.1 | acetolactate_synthase_large_subunit_[Bacillus_cereus]                 | CPTF_Cu         | 4887747.133 | 49165.55123 | 1.00589392  |
| UIJ67764.1 | acetolactate_synthase_large_subunit_[Bacillus_cereus]                 | CPTF_Fe         | 4699284.867 | 61372.84524 | 1.306003934 |
| UIJ67764.1 | acetolactate_synthase_large_subunit_[Bacillus_cereus]                 | CPTF_Mn         | 4847755.933 | 171110.0195 | 3.529674798 |
| UIJ67764.1 | acetolactate_synthase_large_subunit_[Bacillus_cereus]                 | CPTF_Ni         | 4719435.067 | 344041.4607 | 7.28988652  |
| UIJ67764.1 | acetolactate_synthase_large_subunit_[Bacillus_cereus]                 | CPTF_U          | 5735482.667 | 894102.0395 | 15.58895897 |
| UIJ67764.1 | acetolactate_synthase_large_subunit_[Bacillus_cereus]                 | CPTF_metals_mix | 4475044.4   | 238086.0092 | 5.32030496  |
| UIJ67764.1 | acetolactate_synthase_large_subunit_[Bacillus_cereus]                 | CPTF_zcontrol   | 4984688.533 | 97882.6552  | 1.963666427 |
| UIJ67765.1 | acetolactate_synthase_small_subunit_[Bacillus_cereus]                 | CPTF_Al         | 1695286.667 | 102621.8219 | 6.053361001 |
| UIJ67765.1 | acetolactate_synthase_small_subunit_[Bacillus_cereus]                 | CPTF_Cd         | 1489915.8   | 317665.5596 | 21.32104107 |
| UIJ67765.1 | acetolactate_synthase_small_subunit_[Bacillus_cereus]                 | CPTF_Co         | 1663715.367 | 88009.82929 | 5.289957107 |
| UIJ67765.1 | acetolactate_synthase_small_subunit_[Bacillus_cereus]                 | CPTF_Cu         | 1895517.667 | 163032.43   | 8.600944896 |
| UIJ67765.1 | acetolactate_synthase_small_subunit_[Bacillus_cereus]                 | CPTF_Fe         | 1574480.967 | 134223.9136 | 8.524962605 |
| UIJ67765.1 | acetolactate_synthase_small_subunit_[Bacillus_cereus]                 | CPTF_Mn         | 1600663     | 127339.9875 | 7.955452681 |
| UIJ67765.1 | acetolactate_synthase_small_subunit_[Bacillus_cereus]                 | CPTF_Ni         | 1545012.667 | 123861.1708 | 8.016838533 |
| UIJ67765.1 | acetolactate_synthase_small_subunit_[Bacillus_cereus]                 | CPTF_U          | 945845.4333 | 644926.3344 | 68.18517187 |
| UIJ67765.1 | acetolactate_synthase_small_subunit_[Bacillus_cereus]                 | CPTF_metals_mix | 1352451     | 18693.22415 | 1.382173857 |
| UIJ67765.1 | acetolactate_synthase_small_subunit_[Bacillus_cereus]                 | CPTF_zcontrol   | 1562969.367 | 163238.5641 | 10.44413074 |
| UIJ67766.1 | ketol-acid_reductoisomerase_[Bacillus_cereus]                         | CPTF_Al         | 12021683.6  | 605356.2759 | 5.035536586 |
| UIJ67766.1 | ketol-acid_reductoisomerase_[Bacillus_cereus]                         | CPTF_Cd         | 14482460.87 | 535062.9143 | 3.694557984 |
| UIJ67766.1 | ketol-acid_reductoisomerase_[Bacillus_cereus]                         | CPTF_Co         | 12604493.87 | 787550.402  | 6.248171567 |
| UIJ67766.1 | ketol-acid_reductoisomerase_[Bacillus_cereus]                         | CPTF_Cu         | 11591916.33 | 392944.8286 | 3.389817674 |
| UIJ67766.1 | ketol-acid_reductoisomerase_[Bacillus_cereus]                         | CPTF_Fe         | 11992627.13 | 696820.2302 | 5.810405197 |
| UIJ67766.1 | ketol-acid_reductoisomerase_[Bacillus_cereus]                         | CPTF_Mn         | 14673217.43 | 4894005.134 | 33.35331979 |
| UIJ67766.1 | ketol-acid_reductoisomerase_[Bacillus_cereus]                         | CPTF_Ni         | 9760922.367 | 949021.2318 | 9.722659357 |
| UIJ67766.1 | ketol-acid_reductoisomerase_[Bacillus_cereus]                         | CPTF_U          | 10635370.17 | 1340518.452 | 12.60434222 |
| UIJ67766.1 | ketol-acid_reductoisomerase_[Bacillus_cereus]                         | CPTF_metals_mix | 17394460.7  | 570805.4719 | 3.281535897 |
| UIJ67766.1 | ketol-acid_reductoisomerase_[Bacillus_cereus]                         | CPTF_zcontrol   | 11412925.67 | 893576.7055 | 7.829514812 |

|            |                                                                                                                     |                 |             |             |             |
|------------|---------------------------------------------------------------------------------------------------------------------|-----------------|-------------|-------------|-------------|
| UIJ67767.1 | 2-isopropylmalate_synthase_[Bacillus_cereus]                                                                        | CPTF_Al         | 7493170.433 | 429062.9868 | 5.72605402  |
| UIJ67767.1 | 2-isopropylmalate_synthase_[Bacillus_cereus]                                                                        | CPTF_Cd         | 7349765.867 | 905003.717  | 12.31336798 |
| UIJ67767.1 | 2-isopropylmalate_synthase_[Bacillus_cereus]                                                                        | CPTF_Co         | 8389691.067 | 911021.6151 | 10.85882195 |
| UIJ67767.1 | 2-isopropylmalate_synthase_[Bacillus_cereus]                                                                        | CPTF_Cu         | 7962623.933 | 342852.0167 | 4.305766787 |
| UIJ67767.1 | 2-isopropylmalate_synthase_[Bacillus_cereus]                                                                        | CPTF_Fe         | 7262835.267 | 559793.5153 | 7.707644394 |
| UIJ67767.1 | 2-isopropylmalate_synthase_[Bacillus_cereus]                                                                        | CPTF_Mn         | 7542420.167 | 460307.4731 | 6.102914754 |
| UIJ67767.1 | 2-isopropylmalate_synthase_[Bacillus_cereus]                                                                        | CPTF_Ni         | 7248644.967 | 285178.4762 | 3.934231536 |
| UIJ67767.1 | 2-isopropylmalate_synthase_[Bacillus_cereus]                                                                        | CPTF_U          | 6565843.8   | 627386.2553 | 9.555302782 |
| UIJ67767.1 | 2-isopropylmalate_synthase_[Bacillus_cereus]                                                                        | CPTF_metals_mix | 7303478.833 | 237726.413  | 3.254975039 |
| UIJ67767.1 | 2-isopropylmalate_synthase_[Bacillus_cereus]                                                                        | CPTF_zcontrol   | 7583001.867 | 274936.5312 | 3.625695153 |
| UIJ67768.1 | 3-isopropylmalate_dehydrogenase_[Bacillus_cereus]                                                                   | CPTF_Al         | 6845273.9   | 416927.2956 | 6.090732112 |
| UIJ67768.1 | 3-isopropylmalate_dehydrogenase_[Bacillus_cereus]                                                                   | CPTF_Cd         | 6775615.667 | 371236.6491 | 5.47900984  |
| UIJ67768.1 | 3-isopropylmalate_dehydrogenase_[Bacillus_cereus]                                                                   | CPTF_Co         | 6712180     | 781629.5913 | 11.64494384 |
| UIJ67768.1 | 3-isopropylmalate_dehydrogenase_[Bacillus_cereus]                                                                   | CPTF_Cu         | 6248665.233 | 331228.3431 | 5.30078554  |
| UIJ67768.1 | 3-isopropylmalate_dehydrogenase_[Bacillus_cereus]                                                                   | CPTF_Fe         | 6512586.967 | 673065.8981 | 10.33484699 |
| UIJ67768.1 | 3-isopropylmalate_dehydrogenase_[Bacillus_cereus]                                                                   | CPTF_Mn         | 6790667.4   | 684410.0127 | 10.07868553 |
| UIJ67768.1 | 3-isopropylmalate_dehydrogenase_[Bacillus_cereus]                                                                   | CPTF_Ni         | 5232808     | 195160.5946 | 3.729557718 |
| UIJ67768.1 | 3-isopropylmalate_dehydrogenase_[Bacillus_cereus]                                                                   | CPTF_U          | 5085585.333 | 1010107.922 | 19.86217624 |
| UIJ67768.1 | 3-isopropylmalate_dehydrogenase_[Bacillus_cereus]                                                                   | CPTF_metals_mix | 4481589.1   | 333702.6926 | 7.446079619 |
| UIJ67768.1 | 3-isopropylmalate_dehydrogenase_[Bacillus_cereus]                                                                   | CPTF_zcontrol   | 5950754.433 | 1123976.363 | 18.88796414 |
| UIJ67769.1 | 3-isopropylmalate_dehydratase_large_subunit_[Bacillus_cereus]                                                       | CPTF_Al         | 439751      | 146193.3996 | 33.24458606 |
| UIJ67769.1 | 3-isopropylmalate_dehydratase_large_subunit_[Bacillus_cereus]                                                       | CPTF_Cd         | 797510.3333 | 57582.06191 | 7.22022769  |
| UIJ67769.1 | 3-isopropylmalate_dehydratase_large_subunit_[Bacillus_cereus]                                                       | CPTF_Co         | 531787.6667 | 237624.508  | 44.68409535 |
| UIJ67769.1 | 3-isopropylmalate_dehydratase_large_subunit_[Bacillus_cereus]                                                       | CPTF_Cu         | 487626.6667 | 311467.6929 | 63.87421242 |
| UIJ67769.1 | 3-isopropylmalate_dehydratase_large_subunit_[Bacillus_cereus]                                                       | CPTF_Fe         | 504856      | 134455.1006 | 26.63236658 |
| UIJ67769.1 | 3-isopropylmalate_dehydratase_large_subunit_[Bacillus_cereus]                                                       | CPTF_Mn         | 549820.3333 | 178455.9887 | 32.45714606 |
| UIJ67769.1 | 3-isopropylmalate_dehydratase_large_subunit_[Bacillus_cereus]                                                       | CPTF_Ni         | 118042.3333 | 102269.197  | 86.63772912 |
| UIJ67769.1 | 3-isopropylmalate_dehydratase_large_subunit_[Bacillus_cereus]                                                       | CPTF_U          | 119928      | 207721.3893 | 173.2050808 |
| UIJ67769.1 | 3-isopropylmalate_dehydratase_large_subunit_[Bacillus_cereus]                                                       | CPTF_metals_mix | 0           | 0           | 0           |
| UIJ67769.1 | 3-isopropylmalate_dehydratase_large_subunit_[Bacillus_cereus]                                                       | CPTF_zcontrol   | 311950      | 292415.6003 | 93.73797092 |
| UIJ67775.1 | 1-(5-phosphoribosyl)-5-[(5-phosphoribosylamino)methylideneamino]imidazole-4-carboxamide_isomerase_[Bacillus_cereus] | CPTF_Al         | 217520.6667 | 45482.10682 | 20.90932669 |
| UIJ67775.1 | 1-(5-phosphoribosyl)-5-[(5-phosphoribosylamino)methylideneamino]imidazole-4-carboxamide_isomerase_[Bacillus_cereus] | CPTF_Cd         | 53320.66667 | 92354.10376 | 173.2050808 |
| UIJ67775.1 | 1-(5-phosphoribosyl)-5-[(5-phosphoribosylamino)methylideneamino]imidazole-4-carboxamide_isomerase_[Bacillus_cereus] | CPTF_Co         | 118183.6667 | 121509.962  | 102.8145136 |
| UIJ67775.1 | 1-(5-phosphoribosyl)-5-[(5-phosphoribosylamino)methylideneamino]imidazole-4-carboxamide_isomerase_[Bacillus_cereus] | CPTF_Cu         | 148296.1    | 46788.67048 | 31.55084354 |
| UIJ67775.1 | 1-(5-phosphoribosyl)-5-[(5-phosphoribosylamino)methylideneamino]imidazole-4-carboxamide_isomerase_[Bacillus_cereus] | CPTF_Fe         | 218862.3333 | 72154.67232 | 32.96806317 |
| UIJ67775.1 | 1-(5-phosphoribosyl)-5-[(5-phosphoribosylamino)methylideneamino]imidazole-4-carboxamide_isomerase_[Bacillus_cereus] | CPTF_Mn         | 47832.33333 | 82848.03158 | 173.2050808 |
| UIJ67775.1 | 1-(5-phosphoribosyl)-5-[(5-phosphoribosylamino)methylideneamino]imidazole-4-carboxamide_isomerase_[Bacillus_cereus] | CPTF_Ni         | 125349.3667 | 60529.62333 | 48.28873487 |
| UIJ67775.1 | 1-(5-phosphoribosyl)-5-[(5-phosphoribosylamino)methylideneamino]imidazole-4-carboxamide_isomerase_[Bacillus_cereus] | CPTF_U          | 139645      | 121068.1898 | 86.69711755 |
| UIJ67775.1 | 1-(5-phosphoribosyl)-5-[(5-phosphoribosylamino)methylideneamino]imidazole-4-carboxamide_isomerase_[Bacillus_cereus] | CPTF_metals_mix | 65825.3     | 58747.86987 | 89.24816122 |
| UIJ67775.1 | 1-(5-phosphoribosyl)-5-[(5-phosphoribosylamino)methylideneamino]imidazole-4-carboxamide_isomerase_[Bacillus_cereus] | CPTF_zcontrol   | 72167.9     | 79285.8296  | 109.8630133 |
| UIJ67781.1 | glycerate_dehydrogenase_[Bacillus_cereus]                                                                           | CPTF_Al         | 1577160.233 | 420016.7347 | 26.63120245 |
| UIJ67781.1 | glycerate_dehydrogenase_[Bacillus_cereus]                                                                           | CPTF_Cd         | 1777826.9   | 184157.01   | 10.35854559 |
| UIJ67781.1 | glycerate_dehydrogenase_[Bacillus_cereus]                                                                           | CPTF_Co         | 2036649.667 | 216170.372  | 10.61401848 |
| UIJ67781.1 | glycerate_dehydrogenase_[Bacillus_cereus]                                                                           | CPTF_Cu         | 1823751.333 | 558570.3458 | 30.62754969 |
| UIJ67781.1 | glycerate_dehydrogenase_[Bacillus_cereus]                                                                           | CPTF_Fe         | 903338.1333 | 46252.00953 | 5.12012145  |
| UIJ67781.1 | glycerate_dehydrogenase_[Bacillus_cereus]                                                                           | CPTF_Mn         | 1519703.5   | 513316.6743 | 33.77742265 |
| UIJ67781.1 | glycerate_dehydrogenase_[Bacillus_cereus]                                                                           | CPTF_Ni         | 1257415.033 | 58210.50268 | 4.629378617 |
| UIJ67781.1 | glycerate_dehydrogenase_[Bacillus_cereus]                                                                           | CPTF_U          | 1469807.833 | 477797.6065 | 32.5074881  |
| UIJ67781.1 | glycerate_dehydrogenase_[Bacillus_cereus]                                                                           | CPTF_metals_mix | 3519437.433 | 64926.11288 | 1.844786677 |
| UIJ67781.1 | glycerate_dehydrogenase_[Bacillus_cereus]                                                                           | CPTF_zcontrol   | 1640467.133 | 107205.3688 | 6.535051304 |
| UIJ67785.1 | diaminopimelate_decarboxylase_[Bacillus_cereus]                                                                     | CPTF_Al         | 95572.5     | 35000.85016 | 36.62230261 |
| UIJ67785.1 | diaminopimelate_decarboxylase_[Bacillus_cereus]                                                                     | CPTF_Cd         | 44307.33333 | 76742.55248 | 173.2050808 |
| UIJ67785.1 | diaminopimelate_decarboxylase_[Bacillus_cereus]                                                                     | CPTF_Co         | 111719.2    | 56918.46467 | 50.94779114 |
| UIJ67785.1 | diaminopimelate_decarboxylase_[Bacillus_cereus]                                                                     | CPTF_Cu         | 138691.3333 | 30065.18036 | 21.67776431 |
| UIJ67785.1 | diaminopimelate_decarboxylase_[Bacillus_cereus]                                                                     | CPTF_Fe         | 52567.1     | 52533.0332  | 99.93519369 |
| UIJ67785.1 | diaminopimelate_decarboxylase_[Bacillus_cereus]                                                                     | CPTF_Mn         | 57673.86667 | 68554.24716 | 118.8653564 |
| UIJ67785.1 | diaminopimelate_decarboxylase_[Bacillus_cereus]                                                                     | CPTF_Ni         | 90248.43333 | 105937.4533 | 117.3842574 |
| UIJ67785.1 | diaminopimelate_decarboxylase_[Bacillus_cereus]                                                                     | CPTF_U          | 55266.46667 | 47938.82407 | 86.7412501  |
| UIJ67785.1 | diaminopimelate_decarboxylase_[Bacillus_cereus]                                                                     | CPTF_metals_mix | 678759      | 116871.4008 | 17.21839428 |
| UIJ67785.1 | diaminopimelate_decarboxylase_[Bacillus_cereus]                                                                     | CPTF_zcontrol   | 47014.66667 | 7610.304197 | 16.1870853  |
| UIJ67787.1 | phosphoadenylyl-sulfate_reductase_[Bacillus_cereus]                                                                 | CPTF_Al         | 105647.6667 | 97018.48463 | 91.832113   |



|            |                                                     |                 |             |             |             |
|------------|-----------------------------------------------------|-----------------|-------------|-------------|-------------|
| UIJ67787.1 | phosphoadenylyl-sulfate_reductase_[Bacillus_cereus] | CPTF_Cd         | 0           | 0           | 0           |
| UIJ67787.1 | phosphoadenylyl-sulfate_reductase_[Bacillus_cereus] | CPTF_Co         | 110924.9667 | 111368.5693 | 100.3999123 |
| UIJ67787.1 | phosphoadenylyl-sulfate_reductase_[Bacillus_cereus] | CPTF_Cu         | 117116.0333 | 101567.3099 | 86.72365944 |
| UIJ67787.1 | phosphoadenylyl-sulfate_reductase_[Bacillus_cereus] | CPTF_Fe         | 104363.3    | 158455.2606 | 151.8304429 |
| UIJ67787.1 | phosphoadenylyl-sulfate_reductase_[Bacillus_cereus] | CPTF_Mn         | 28026.03333 | 48542.51367 | 173.2050808 |
| UIJ67787.1 | phosphoadenylyl-sulfate_reductase_[Bacillus_cereus] | CPTF_Ni         | 68465.4     | 94610.47288 | 138.1872784 |
| UIJ67787.1 | phosphoadenylyl-sulfate_reductase_[Bacillus_cereus] | CPTF_U          | 0           | 0           | 0           |
| UIJ67787.1 | phosphoadenylyl-sulfate_reductase_[Bacillus_cereus] | CPTF_metals_mix | 0           | 0           | 0           |
| UIJ67787.1 | phosphoadenylyl-sulfate_reductase_[Bacillus_cereus] | CPTF_zcontrol   | 135038.3667 | 117410.622  | 86.94612122 |
| UIJ67788.1 | sulfate_adenylyltransferase_[Bacillus_cereus]       | CPTF_Al         | 3530025.667 | 342734.8779 | 9.709132746 |
| UIJ67788.1 | sulfate_adenylyltransferase_[Bacillus_cereus]       | CPTF_Cd         | 2852068.9   | 304639.9504 | 10.68136714 |
| UIJ67788.1 | sulfate_adenylyltransferase_[Bacillus_cereus]       | CPTF_Co         | 3192544.233 | 391565.6848 | 12.26500422 |
| UIJ67788.1 | sulfate_adenylyltransferase_[Bacillus_cereus]       | CPTF_Cu         | 3834829.867 | 309550.4254 | 8.072077149 |
| UIJ67788.1 | sulfate_adenylyltransferase_[Bacillus_cereus]       | CPTF_Fe         | 2842685.833 | 305606.2335 | 10.75061584 |
| UIJ67788.1 | sulfate_adenylyltransferase_[Bacillus_cereus]       | CPTF_Mn         | 3019295.067 | 467079.6135 | 15.46982336 |
| UIJ67788.1 | sulfate_adenylyltransferase_[Bacillus_cereus]       | CPTF_Ni         | 2743882.833 | 843450.5919 | 30.73930788 |
| UIJ67788.1 | sulfate_adenylyltransferase_[Bacillus_cereus]       | CPTF_U          | 2369517.533 | 435043.4054 | 18.35999942 |
| UIJ67788.1 | sulfate_adenylyltransferase_[Bacillus_cereus]       | CPTF_metals_mix | 1309492.767 | 252249.474  | 19.26314374 |
| UIJ67788.1 | sulfate_adenylyltransferase_[Bacillus_cereus]       | CPTF_zcontrol   | 3030878.367 | 127705.2533 | 4.213473383 |
| UIJ67789.1 | adenylyl-sulfate_kinase_[Bacillus_cereus]           | CPTF_Al         | 1673809.333 | 256305.6482 | 15.31271472 |
| UIJ67789.1 | adenylyl-sulfate_kinase_[Bacillus_cereus]           | CPTF_Cd         | 1412665.6   | 190148.0269 | 13.46022915 |
| UIJ67789.1 | adenylyl-sulfate_kinase_[Bacillus_cereus]           | CPTF_Co         | 1392925     | 93704.32097 | 6.727161977 |
| UIJ67789.1 | adenylyl-sulfate_kinase_[Bacillus_cereus]           | CPTF_Cu         | 1756927.667 | 192041.3007 | 10.93051833 |
| UIJ67789.1 | adenylyl-sulfate_kinase_[Bacillus_cereus]           | CPTF_Fe         | 1492028.333 | 68941.29752 | 4.62064265  |
| UIJ67789.1 | adenylyl-sulfate_kinase_[Bacillus_cereus]           | CPTF_Mn         | 1652874.133 | 84699.52017 | 5.124378104 |
| UIJ67789.1 | adenylyl-sulfate_kinase_[Bacillus_cereus]           | CPTF_Ni         | 1409135.533 | 435888.6371 | 30.9330527  |
| UIJ67789.1 | adenylyl-sulfate_kinase_[Bacillus_cereus]           | CPTF_U          | 1332651.667 | 385623.1503 | 28.93653007 |
| UIJ67789.1 | adenylyl-sulfate_kinase_[Bacillus_cereus]           | CPTF_metals_mix | 703885.9    | 61459.23099 | 8.731420688 |
| UIJ67789.1 | adenylyl-sulfate_kinase_[Bacillus_cereus]           | CPTF_zcontrol   | 1830086.667 | 156484.3806 | 8.550654098 |
| UIJ67790.1 | nitrite/sulfite_reductase_[Bacillus_cereus]         | CPTF_Al         | 3533491.833 | 379686.816  | 10.74537126 |
| UIJ67790.1 | nitrite/sulfite_reductase_[Bacillus_cereus]         | CPTF_Cd         | 2586170.833 | 321975.6007 | 12.44989683 |
| UIJ67790.1 | nitrite/sulfite_reductase_[Bacillus_cereus]         | CPTF_Co         | 3455845.267 | 313947.2158 | 9.084527564 |
| UIJ67790.1 | nitrite/sulfite_reductase_[Bacillus_cereus]         | CPTF_Cu         | 4475465.5   | 265842.4104 | 5.93999463  |
| UIJ67790.1 | nitrite/sulfite_reductase_[Bacillus_cereus]         | CPTF_Fe         | 3095177.4   | 725043.6094 | 23.42494519 |
| UIJ67790.1 | nitrite/sulfite_reductase_[Bacillus_cereus]         | CPTF_Mn         | 3174931.267 | 249130.2755 | 7.84679272  |
| UIJ67790.1 | nitrite/sulfite_reductase_[Bacillus_cereus]         | CPTF_Ni         | 3212560.6   | 330828.4969 | 10.29796907 |
| UIJ67790.1 | nitrite/sulfite_reductase_[Bacillus_cereus]         | CPTF_U          | 2960592.233 | 884280.518  | 29.8683658  |
| UIJ67790.1 | nitrite/sulfite_reductase_[Bacillus_cereus]         | CPTF_metals_mix | 741543.0333 | 152293.1973 | 20.53733774 |
| UIJ67790.1 | nitrite/sulfite_reductase_[Bacillus_cereus]         | CPTF_zcontrol   | 3607898     | 331049.1756 | 9.17568001  |
| UIJ67791.1 | DUF3906_family_protein_[Bacillus_cereus]            | CPTF_Al         | 42717.33333 | 73988.5917  | 173.2050808 |
| UIJ67791.1 | DUF3906_family_protein_[Bacillus_cereus]            | CPTF_Cd         | 73929.7     | 66492.40244 | 89.94004093 |
| UIJ67791.1 | DUF3906_family_protein_[Bacillus_cereus]            | CPTF_Co         | 142340.3333 | 10722.67049 | 7.533121663 |
| UIJ67791.1 | DUF3906_family_protein_[Bacillus_cereus]            | CPTF_Cu         | 153580.6667 | 23962.26609 | 15.6023975  |
| UIJ67791.1 | DUF3906_family_protein_[Bacillus_cereus]            | CPTF_Fe         | 80957.83333 | 80544.72809 | 99.48972789 |
| UIJ67791.1 | DUF3906_family_protein_[Bacillus_cereus]            | CPTF_Mn         | 15705.56667 | 27202.83943 | 173.2050808 |
| UIJ67791.1 | DUF3906_family_protein_[Bacillus_cereus]            | CPTF_Ni         | 53931.33333 | 93411.80945 | 173.2050808 |
| UIJ67791.1 | DUF3906_family_protein_[Bacillus_cereus]            | CPTF_U          | 44804.66667 | 77603.95908 | 173.2050808 |
| UIJ67791.1 | DUF3906_family_protein_[Bacillus_cereus]            | CPTF_metals_mix | 0           | 0           | 0           |
| UIJ67791.1 | DUF3906_family_protein_[Bacillus_cereus]            | CPTF_zcontrol   | 96962.26667 | 29289.60734 | 30.2072222  |
| UIJ67793.1 | NAD(P)-binding_protein_[Bacillus_cereus]            | CPTF_Al         | 12169.86667 | 21078.82739 | 173.2050808 |
| UIJ67793.1 | NAD(P)-binding_protein_[Bacillus_cereus]            | CPTF_Cd         | 7757.433333 | 13436.26867 | 173.2050808 |
| UIJ67793.1 | NAD(P)-binding_protein_[Bacillus_cereus]            | CPTF_Co         | 78763.03333 | 75006.24172 | 95.23026037 |
| UIJ67793.1 | NAD(P)-binding_protein_[Bacillus_cereus]            | CPTF_Cu         | 73769.76667 | 23308.77989 | 31.59665666 |
| UIJ67793.1 | NAD(P)-binding_protein_[Bacillus_cereus]            | CPTF_Fe         | 0           | 0           | 0           |
| UIJ67793.1 | NAD(P)-binding_protein_[Bacillus_cereus]            | CPTF_Mn         | 0           | 0           | 0           |
| UIJ67793.1 | NAD(P)-binding_protein_[Bacillus_cereus]            | CPTF_Ni         | 13315.46667 | 23063.06479 | 173.2050808 |
| UIJ67793.1 | NAD(P)-binding_protein_[Bacillus_cereus]            | CPTF_U          | 0           | 0           | 0           |
| UIJ67793.1 | NAD(P)-binding_protein_[Bacillus_cereus]            | CPTF_metals_mix | 0           | 0           | 0           |
| UIJ67793.1 | NAD(P)-binding_protein_[Bacillus_cereus]            | CPTF_zcontrol   | 20753.4     | 17983.00055 | 86.6508647  |
| UIJ67800.1 | PspA/IM30_family_protein_[Bacillus_cereus]          | CPTF_Al         | 0           | 0           | 0           |
| UIJ67800.1 | PspA/IM30_family_protein_[Bacillus_cereus]          | CPTF_Cd         | 0           | 0           | 0           |

|            |                                                           |                 |             |             |             |
|------------|-----------------------------------------------------------|-----------------|-------------|-------------|-------------|
| UIJ67800.1 | PspA/IM30_family_protein_[Bacillus_cereus]                | CPTF_Co         | 0           | 0           | 0           |
| UIJ67800.1 | PspA/IM30_family_protein_[Bacillus_cereus]                | CPTF_Cu         | 0           | 0           | 0           |
| UIJ67800.1 | PspA/IM30_family_protein_[Bacillus_cereus]                | CPTF_Fe         | 0           | 0           | 0           |
| UIJ67800.1 | PspA/IM30_family_protein_[Bacillus_cereus]                | CPTF_Mn         | 0           | 0           | 0           |
| UIJ67800.1 | PspA/IM30_family_protein_[Bacillus_cereus]                | CPTF_Ni         | 0           | 0           | 0           |
| UIJ67800.1 | PspA/IM30_family_protein_[Bacillus_cereus]                | CPTF_U          | 196867.3333 | 340984.2237 | 173.2050808 |
| UIJ67800.1 | PspA/IM30_family_protein_[Bacillus_cereus]                | CPTF_metals_mix | 69281.76667 | 64232.3259  | 92.71173208 |
| UIJ67800.1 | PspA/IM30_family_protein_[Bacillus_cereus]                | CPTF_zcontrol   | 0           | 0           | 0           |
| UIJ67811.1 | NO-inducible_flavohemoprotein_[Bacillus_cereus]           | CPTF_Al         | 3385109.567 | 847291.0884 | 25.02994576 |
| UIJ67811.1 | NO-inducible_flavohemoprotein_[Bacillus_cereus]           | CPTF_Cd         | 3907220.967 | 884501.2016 | 22.63760379 |
| UIJ67811.1 | NO-inducible_flavohemoprotein_[Bacillus_cereus]           | CPTF_Co         | 2149332.833 | 259060.692  | 12.0530747  |
| UIJ67811.1 | NO-inducible_flavohemoprotein_[Bacillus_cereus]           | CPTF_Cu         | 3047478.5   | 375889.281  | 12.33443586 |
| UIJ67811.1 | NO-inducible_flavohemoprotein_[Bacillus_cereus]           | CPTF_Fe         | 3310056.967 | 421600.0553 | 12.73694258 |
| UIJ67811.1 | NO-inducible_flavohemoprotein_[Bacillus_cereus]           | CPTF_Mn         | 3151749.9   | 782491.4946 | 24.82720772 |
| UIJ67811.1 | NO-inducible_flavohemoprotein_[Bacillus_cereus]           | CPTF_Ni         | 2242636.333 | 512975.1814 | 22.87375683 |
| UIJ67811.1 | NO-inducible_flavohemoprotein_[Bacillus_cereus]           | CPTF_U          | 2747238.667 | 515521.4821 | 18.76507813 |
| UIJ67811.1 | NO-inducible_flavohemoprotein_[Bacillus_cereus]           | CPTF_metals_mix | 2254869.2   | 327336.9737 | 14.51689409 |
| UIJ67811.1 | NO-inducible_flavohemoprotein_[Bacillus_cereus]           | CPTF_zcontrol   | 2666429.233 | 107558.9895 | 4.033821267 |
| UIJ67816.1 | DUF47_domain-containing_protein_[Bacillus_cereus]         | CPTF_Al         | 452744.7    | 246635.8524 | 54.47570173 |
| UIJ67816.1 | DUF47_domain-containing_protein_[Bacillus_cereus]         | CPTF_Cd         | 1063633.933 | 135906.1434 | 12.77752986 |
| UIJ67816.1 | DUF47_domain-containing_protein_[Bacillus_cereus]         | CPTF_Co         | 597308.1    | 153633.4382 | 25.72097017 |
| UIJ67816.1 | DUF47_domain-containing_protein_[Bacillus_cereus]         | CPTF_Cu         | 372170.3333 | 111181.4304 | 29.87380252 |
| UIJ67816.1 | DUF47_domain-containing_protein_[Bacillus_cereus]         | CPTF_Fe         | 673479.4    | 361886.0486 | 53.73379626 |
| UIJ67816.1 | DUF47_domain-containing_protein_[Bacillus_cereus]         | CPTF_Mn         | 662896.9667 | 440709.5833 | 66.48236536 |
| UIJ67816.1 | DUF47_domain-containing_protein_[Bacillus_cereus]         | CPTF_Ni         | 208504.8    | 66007.6923  | 31.6576368  |
| UIJ67816.1 | DUF47_domain-containing_protein_[Bacillus_cereus]         | CPTF_U          | 185722.1333 | 65948.98573 | 35.50949181 |
| UIJ67816.1 | DUF47_domain-containing_protein_[Bacillus_cereus]         | CPTF_metals_mix | 1930538.867 | 118274.5731 | 6.126505671 |
| UIJ67816.1 | DUF47_domain-containing_protein_[Bacillus_cereus]         | CPTF_zcontrol   | 514180.3333 | 237081.4248 | 46.10861392 |
| UIJ67817.1 | PBP1A_family_penicillin-binding_protein_[Bacillus_cereus] | CPTF_Al         | 0           | 0           | 0           |
| UIJ67817.1 | PBP1A_family_penicillin-binding_protein_[Bacillus_cereus] | CPTF_Cd         | 0           | 0           | 0           |
| UIJ67817.1 | PBP1A_family_penicillin-binding_protein_[Bacillus_cereus] | CPTF_Co         | 17695.2     | 30648.98545 | 173.2050808 |
| UIJ67817.1 | PBP1A_family_penicillin-binding_protein_[Bacillus_cereus] | CPTF_Cu         | 0           | 0           | 0           |
| UIJ67817.1 | PBP1A_family_penicillin-binding_protein_[Bacillus_cereus] | CPTF_Fe         | 0           | 0           | 0           |
| UIJ67817.1 | PBP1A_family_penicillin-binding_protein_[Bacillus_cereus] | CPTF_Mn         | 0           | 0           | 0           |
| UIJ67817.1 | PBP1A_family_penicillin-binding_protein_[Bacillus_cereus] | CPTF_Ni         | 0           | 0           | 0           |
| UIJ67817.1 | PBP1A_family_penicillin-binding_protein_[Bacillus_cereus] | CPTF_U          | 0           | 0           | 0           |
| UIJ67817.1 | PBP1A_family_penicillin-binding_protein_[Bacillus_cereus] | CPTF_metals_mix | 0           | 0           | 0           |
| UIJ67817.1 | PBP1A_family_penicillin-binding_protein_[Bacillus_cereus] | CPTF_zcontrol   | 19410.3     | 33619.62579 | 173.2050808 |
| UIJ67821.1 | DUF3924_domain-containing_protein_[Bacillus_cereus]       | CPTF_Al         | 505016.3333 | 81059.15729 | 16.05079914 |
| UIJ67821.1 | DUF3924_domain-containing_protein_[Bacillus_cereus]       | CPTF_Cd         | 485395      | 27888.94141 | 5.745617777 |
| UIJ67821.1 | DUF3924_domain-containing_protein_[Bacillus_cereus]       | CPTF_Co         | 416617.9667 | 44116.03063 | 10.589085   |
| UIJ67821.1 | DUF3924_domain-containing_protein_[Bacillus_cereus]       | CPTF_Cu         | 295888.4667 | 10578.19394 | 3.575061259 |
| UIJ67821.1 | DUF3924_domain-containing_protein_[Bacillus_cereus]       | CPTF_Fe         | 518425      | 73994.3383  | 14.27291089 |
| UIJ67821.1 | DUF3924_domain-containing_protein_[Bacillus_cereus]       | CPTF_Mn         | 378125.1    | 65780.43403 | 17.39647382 |
| UIJ67821.1 | DUF3924_domain-containing_protein_[Bacillus_cereus]       | CPTF_Ni         | 522178      | 62924.96103 | 12.05048107 |
| UIJ67821.1 | DUF3924_domain-containing_protein_[Bacillus_cereus]       | CPTF_U          | 275074.8    | 220674.0264 | 80.22327977 |
| UIJ67821.1 | DUF3924_domain-containing_protein_[Bacillus_cereus]       | CPTF_metals_mix | 24952.3     | 22869.73686 | 91.65382293 |
| UIJ67821.1 | DUF3924_domain-containing_protein_[Bacillus_cereus]       | CPTF_zcontrol   | 312018.7667 | 60803.5526  | 19.487146   |
| UIJ67822.1 | tyrosine-type_recombinase/integrase_[Bacillus_cereus]     | CPTF_Al         | 0           | 0           | 0           |
| UIJ67822.1 | tyrosine-type_recombinase/integrase_[Bacillus_cereus]     | CPTF_Cd         | 0           | 0           | 0           |
| UIJ67822.1 | tyrosine-type_recombinase/integrase_[Bacillus_cereus]     | CPTF_Co         | 0           | 0           | 0           |
| UIJ67822.1 | tyrosine-type_recombinase/integrase_[Bacillus_cereus]     | CPTF_Cu         | 0           | 0           | 0           |
| UIJ67822.1 | tyrosine-type_recombinase/integrase_[Bacillus_cereus]     | CPTF_Fe         | 0           | 0           | 0           |
| UIJ67822.1 | tyrosine-type_recombinase/integrase_[Bacillus_cereus]     | CPTF_Mn         | 0           | 0           | 0           |
| UIJ67822.1 | tyrosine-type_recombinase/integrase_[Bacillus_cereus]     | CPTF_Ni         | 0           | 0           | 0           |
| UIJ67822.1 | tyrosine-type_recombinase/integrase_[Bacillus_cereus]     | CPTF_U          | 0           | 0           | 0           |
| UIJ67822.1 | tyrosine-type_recombinase/integrase_[Bacillus_cereus]     | CPTF_metals_mix | 64585.2     | 69516.12012 | 107.6347524 |
| UIJ67822.1 | tyrosine-type_recombinase/integrase_[Bacillus_cereus]     | CPTF_zcontrol   | 0           | 0           | 0           |
| UIJ67824.1 | purine-nucleoside_phosphorylase_[Bacillus_cereus]         | CPTF_Al         | 1243130.933 | 111523.5937 | 8.971186435 |
| UIJ67824.1 | purine-nucleoside_phosphorylase_[Bacillus_cereus]         | CPTF_Cd         | 1330333     | 79688.88126 | 5.990145419 |
| UIJ67824.1 | purine-nucleoside_phosphorylase_[Bacillus_cereus]         | CPTF_Co         | 1207105.267 | 43505.96032 | 3.604156284 |

|            |                                                              |                 |             |             |             |
|------------|--------------------------------------------------------------|-----------------|-------------|-------------|-------------|
| UIJ67824.1 | purine-nucleoside_phosphorylase_[Bacillus_cereus]            | CPTF_Cu         | 1683493.333 | 71949.74694 | 4.273836166 |
| UIJ67824.1 | purine-nucleoside_phosphorylase_[Bacillus_cereus]            | CPTF_Fe         | 1116377.967 | 60514.27488 | 5.42059022  |
| UIJ67824.1 | purine-nucleoside_phosphorylase_[Bacillus_cereus]            | CPTF_Mn         | 1194124.967 | 51095.86073 | 4.278937478 |
| UIJ67824.1 | purine-nucleoside_phosphorylase_[Bacillus_cereus]            | CPTF_Ni         | 1268546.667 | 130206.6868 | 10.26424098 |
| UIJ67824.1 | purine-nucleoside_phosphorylase_[Bacillus_cereus]            | CPTF_U          | 1095089.667 | 97222.34262 | 8.878025752 |
| UIJ67824.1 | purine-nucleoside_phosphorylase_[Bacillus_cereus]            | CPTF_metals_mix | 1490069.433 | 40921.13511 | 2.746256932 |
| UIJ67824.1 | purine-nucleoside_phosphorylase_[Bacillus_cereus]            | CPTF_zcontrol   | 1246279     | 17882.75776 | 1.434892007 |
| UIJ67828.1 | Ypul_family_protein_[Bacillus_cereus]                        | CPTF_Al         | 160120.7    | 14393.51884 | 8.989168074 |
| UIJ67828.1 | Ypul_family_protein_[Bacillus_cereus]                        | CPTF_Cd         | 181902.6667 | 10141.75873 | 5.575376609 |
| UIJ67828.1 | Ypul_family_protein_[Bacillus_cereus]                        | CPTF_Co         | 137878.3    | 16051.97162 | 11.6421305  |
| UIJ67828.1 | Ypul_family_protein_[Bacillus_cereus]                        | CPTF_Cu         | 188542.6333 | 20300.34205 | 10.76697704 |
| UIJ67828.1 | Ypul_family_protein_[Bacillus_cereus]                        | CPTF_Fe         | 153876      | 34793.86631 | 22.61162645 |
| UIJ67828.1 | Ypul_family_protein_[Bacillus_cereus]                        | CPTF_Mn         | 80787.1     | 27396.01815 | 33.91137713 |
| UIJ67828.1 | Ypul_family_protein_[Bacillus_cereus]                        | CPTF_Ni         | 172129.8    | 51175.60559 | 29.73082267 |
| UIJ67828.1 | Ypul_family_protein_[Bacillus_cereus]                        | CPTF_U          | 69629.53333 | 65992.27253 | 94.77626716 |
| UIJ67828.1 | Ypul_family_protein_[Bacillus_cereus]                        | CPTF_metals_mix | 144572.2    | 9053.39981  | 6.262199655 |
| UIJ67828.1 | Ypul_family_protein_[Bacillus_cereus]                        | CPTF_zcontrol   | 109432.1333 | 24622.35706 | 22.50011611 |
| UIJ67833.1 | 23S_rRNA_pseudouridine(2605)_synthase_RluB_[Bacillus_cereus] | CPTF_Al         | 7412.766667 | 12839.28849 | 173.2050808 |
| UIJ67833.1 | 23S_rRNA_pseudouridine(2605)_synthase_RluB_[Bacillus_cereus] | CPTF_Cd         | 0           | 0           | 0           |
| UIJ67833.1 | 23S_rRNA_pseudouridine(2605)_synthase_RluB_[Bacillus_cereus] | CPTF_Co         | 0           | 0           | 0           |
| UIJ67833.1 | 23S_rRNA_pseudouridine(2605)_synthase_RluB_[Bacillus_cereus] | CPTF_Cu         | 0           | 0           | 0           |
| UIJ67833.1 | 23S_rRNA_pseudouridine(2605)_synthase_RluB_[Bacillus_cereus] | CPTF_Fe         | 0           | 0           | 0           |
| UIJ67833.1 | 23S_rRNA_pseudouridine(2605)_synthase_RluB_[Bacillus_cereus] | CPTF_Mn         | 0           | 0           | 0           |
| UIJ67833.1 | 23S_rRNA_pseudouridine(2605)_synthase_RluB_[Bacillus_cereus] | CPTF_Ni         | 0           | 0           | 0           |
| UIJ67833.1 | 23S_rRNA_pseudouridine(2605)_synthase_RluB_[Bacillus_cereus] | CPTF_U          | 0           | 0           | 0           |
| UIJ67833.1 | 23S_rRNA_pseudouridine(2605)_synthase_RluB_[Bacillus_cereus] | CPTF_metals_mix | 32948.16667 | 57067.89868 | 173.2050808 |
| UIJ67833.1 | 23S_rRNA_pseudouridine(2605)_synthase_RluB_[Bacillus_cereus] | CPTF_zcontrol   | 0           | 0           | 0           |
| UIJ67834.1 | thiol-disulfide_oxidoreductase_ResA_[Bacillus_cereus]        | CPTF_Al         | 72650.53333 | 72130.25463 | 99.28386114 |
| UIJ67834.1 | thiol-disulfide_oxidoreductase_ResA_[Bacillus_cereus]        | CPTF_Cd         | 53158.26667 | 67436.13904 | 126.8591759 |
| UIJ67834.1 | thiol-disulfide_oxidoreductase_ResA_[Bacillus_cereus]        | CPTF_Co         | 58533       | 101382.1299 | 173.2050808 |
| UIJ67834.1 | thiol-disulfide_oxidoreductase_ResA_[Bacillus_cereus]        | CPTF_Cu         | 57603.33333 | 99771.90002 | 173.2050808 |
| UIJ67834.1 | thiol-disulfide_oxidoreductase_ResA_[Bacillus_cereus]        | CPTF_Fe         | 43832.3     | 38130.63011 | 86.99208142 |
| UIJ67834.1 | thiol-disulfide_oxidoreductase_ResA_[Bacillus_cereus]        | CPTF_Mn         | 36251.33333 | 62789.15118 | 173.2050808 |
| UIJ67834.1 | thiol-disulfide_oxidoreductase_ResA_[Bacillus_cereus]        | CPTF_Ni         | 38794.66667 | 67194.33373 | 173.2050808 |
| UIJ67834.1 | thiol-disulfide_oxidoreductase_ResA_[Bacillus_cereus]        | CPTF_U          | 110219.1333 | 24267.56634 | 22.01756229 |
| UIJ67834.1 | thiol-disulfide_oxidoreductase_ResA_[Bacillus_cereus]        | CPTF_metals_mix | 6301.733333 | 10914.92231 | 173.2050808 |
| UIJ67834.1 | thiol-disulfide_oxidoreductase_ResA_[Bacillus_cereus]        | CPTF_zcontrol   | 32713.26667 | 56661.03995 | 173.2050808 |
| UIJ67836.1 | cytochrome_c_biogenesis_protein_ResC_[Bacillus_cereus]       | CPTF_Al         | 1465260.667 | 500260.6759 | 34.14141165 |
| UIJ67836.1 | cytochrome_c_biogenesis_protein_ResC_[Bacillus_cereus]       | CPTF_Cd         | 870054.9667 | 729495.1282 | 83.84471742 |
| UIJ67836.1 | cytochrome_c_biogenesis_protein_ResC_[Bacillus_cereus]       | CPTF_Co         | 972672.6667 | 186165.1671 | 19.13954956 |
| UIJ67836.1 | cytochrome_c_biogenesis_protein_ResC_[Bacillus_cereus]       | CPTF_Cu         | 0           | 0           | 0           |
| UIJ67836.1 | cytochrome_c_biogenesis_protein_ResC_[Bacillus_cereus]       | CPTF_Fe         | 1030000     | 902164.0649 | 87.58874417 |
| UIJ67836.1 | cytochrome_c_biogenesis_protein_ResC_[Bacillus_cereus]       | CPTF_Mn         | 333333.3333 | 577350.2692 | 173.2050808 |
| UIJ67836.1 | cytochrome_c_biogenesis_protein_ResC_[Bacillus_cereus]       | CPTF_Ni         | 776341      | 1011331.738 | 130.2690104 |
| UIJ67836.1 | cytochrome_c_biogenesis_protein_ResC_[Bacillus_cereus]       | CPTF_U          | 1023333.333 | 962306.2576 | 94.03644211 |
| UIJ67836.1 | cytochrome_c_biogenesis_protein_ResC_[Bacillus_cereus]       | CPTF_metals_mix | 94863.73333 | 117053.6358 | 123.3913443 |
| UIJ67836.1 | cytochrome_c_biogenesis_protein_ResC_[Bacillus_cereus]       | CPTF_zcontrol   | 1323333.333 | 299054.0642 | 22.5985439  |
| UIJ67837.1 | DNA-binding_response_regulator_ResD_[Bacillus_cereus]        | CPTF_Al         | 792878.2    | 95247.81101 | 12.01291838 |
| UIJ67837.1 | DNA-binding_response_regulator_ResD_[Bacillus_cereus]        | CPTF_Cd         | 821174.1    | 38272.64808 | 4.660722748 |
| UIJ67837.1 | DNA-binding_response_regulator_ResD_[Bacillus_cereus]        | CPTF_Co         | 882560.0667 | 48749.62342 | 5.523660684 |
| UIJ67837.1 | DNA-binding_response_regulator_ResD_[Bacillus_cereus]        | CPTF_Cu         | 883385.5667 | 70879.32495 | 8.02360007  |
| UIJ67837.1 | DNA-binding_response_regulator_ResD_[Bacillus_cereus]        | CPTF_Fe         | 836764.1667 | 74987.37858 | 8.961590562 |
| UIJ67837.1 | DNA-binding_response_regulator_ResD_[Bacillus_cereus]        | CPTF_Mn         | 800986.1333 | 123994.1862 | 15.48019136 |
| UIJ67837.1 | DNA-binding_response_regulator_ResD_[Bacillus_cereus]        | CPTF_Ni         | 906411.9667 | 108933.3981 | 12.01808914 |
| UIJ67837.1 | DNA-binding_response_regulator_ResD_[Bacillus_cereus]        | CPTF_U          | 967941.6    | 99059.19169 | 10.23400499 |
| UIJ67837.1 | DNA-binding_response_regulator_ResD_[Bacillus_cereus]        | CPTF_metals_mix | 808604.3333 | 117582.7176 | 14.54144045 |
| UIJ67837.1 | DNA-binding_response_regulator_ResD_[Bacillus_cereus]        | CPTF_zcontrol   | 808266.8667 | 66285.38673 | 8.200928364 |
| UIJ67849.1 | NAD-specific_glutamate_dehydrogenase_[Bacillus_cereus]       | CPTF_Al         | 2732600.7   | 734093.3642 | 26.86427491 |
| UIJ67849.1 | NAD-specific_glutamate_dehydrogenase_[Bacillus_cereus]       | CPTF_Cd         | 2716063.167 | 265964.1597 | 9.792267093 |
| UIJ67849.1 | NAD-specific_glutamate_dehydrogenase_[Bacillus_cereus]       | CPTF_Co         | 2579336.4   | 651487.376  | 25.25794526 |
| UIJ67849.1 | NAD-specific_glutamate_dehydrogenase_[Bacillus_cereus]       | CPTF_Cu         | 2322978.233 | 283529.4535 | 12.20542876 |

|            |                                                                        |                 |             |             |             |
|------------|------------------------------------------------------------------------|-----------------|-------------|-------------|-------------|
| UIJ67849.1 | NAD-specific glutamate dehydrogenase [Bacillus cereus]                 | CPTF_Fe         | 2703236.967 | 53617.43233 | 1.983452912 |
| UIJ67849.1 | NAD-specific glutamate dehydrogenase [Bacillus cereus]                 | CPTF_Mn         | 2976309.2   | 575546.5681 | 19.33759329 |
| UIJ67849.1 | NAD-specific glutamate dehydrogenase [Bacillus cereus]                 | CPTF_Ni         | 2229005.5   | 185227.0497 | 8.30985162  |
| UIJ67849.1 | NAD-specific glutamate dehydrogenase [Bacillus cereus]                 | CPTF_U          | 2172476.067 | 291658.0388 | 13.42514393 |
| UIJ67849.1 | NAD-specific glutamate dehydrogenase [Bacillus cereus]                 | CPTF_metals_mix | 3572890.267 | 252824.2591 | 7.076183151 |
| UIJ67849.1 | NAD-specific glutamate dehydrogenase [Bacillus cereus]                 | CPTF_zcontrol   | 2783460.333 | 120918.7544 | 4.344188165 |
| UIJ67855.1 | (d)CMP_kinase [Bacillus cereus]                                        | CPTF_Al         | 62198.06667 | 80506.558   | 129.4357885 |
| UIJ67855.1 | (d)CMP_kinase [Bacillus cereus]                                        | CPTF_Cd         | 279299.2333 | 50928.65969 | 18.23444307 |
| UIJ67855.1 | (d)CMP_kinase [Bacillus cereus]                                        | CPTF_Co         | 203999.9333 | 48527.22473 | 23.78786303 |
| UIJ67855.1 | (d)CMP_kinase [Bacillus cereus]                                        | CPTF_Cu         | 232700.1    | 121063.7282 | 52.0256451  |
| UIJ67855.1 | (d)CMP_kinase [Bacillus cereus]                                        | CPTF_Fe         | 181522.8333 | 211182.2032 | 116.3391951 |
| UIJ67855.1 | (d)CMP_kinase [Bacillus cereus]                                        | CPTF_Mn         | 261580.5333 | 118354.0638 | 45.24574606 |
| UIJ67855.1 | (d)CMP_kinase [Bacillus cereus]                                        | CPTF_Ni         | 110303.0333 | 117762.7722 | 106.7629499 |
| UIJ67855.1 | (d)CMP_kinase [Bacillus cereus]                                        | CPTF_U          | 0           | 0           | 0           |
| UIJ67855.1 | (d)CMP_kinase [Bacillus cereus]                                        | CPTF_metals_mix | 172429.1333 | 41610.63426 | 24.13202076 |
| UIJ67855.1 | (d)CMP_kinase [Bacillus cereus]                                        | CPTF_zcontrol   | 176905.2333 | 103146.3108 | 58.30596915 |
| UIJ67856.1 | 30S_ribosomal_protein_S1 [Bacillus cereus]                             | CPTF_Al         | 12809581.93 | 1076536.996 | 8.404154026 |
| UIJ67856.1 | 30S_ribosomal_protein_S1 [Bacillus cereus]                             | CPTF_Cd         | 15380603.6  | 916007.8986 | 5.95560436  |
| UIJ67856.1 | 30S_ribosomal_protein_S1 [Bacillus cereus]                             | CPTF_Co         | 12442553.33 | 501905.2236 | 4.033779966 |
| UIJ67856.1 | 30S_ribosomal_protein_S1 [Bacillus cereus]                             | CPTF_Cu         | 11438377.73 | 867392.2288 | 7.583175246 |
| UIJ67856.1 | 30S_ribosomal_protein_S1 [Bacillus cereus]                             | CPTF_Fe         | 12473062.43 | 2044921.123 | 16.39469965 |
| UIJ67856.1 | 30S_ribosomal_protein_S1 [Bacillus cereus]                             | CPTF_Mn         | 14293041.27 | 5012800.554 | 35.07161604 |
| UIJ67856.1 | 30S_ribosomal_protein_S1 [Bacillus cereus]                             | CPTF_Ni         | 10518892    | 965854.726  | 9.182095661 |
| UIJ67856.1 | 30S_ribosomal_protein_S1 [Bacillus cereus]                             | CPTF_U          | 10821443.57 | 583882.4863 | 5.395606258 |
| UIJ67856.1 | 30S_ribosomal_protein_S1 [Bacillus cereus]                             | CPTF_metals_mix | 24681317.76 | 1649810.44  | 6.684450386 |
| UIJ67856.1 | 30S_ribosomal_protein_S1 [Bacillus cereus]                             | CPTF_zcontrol   | 11702649.07 | 854793.9595 | 7.304277473 |
| UIJ67861.1 | ribosome-associated_GTPase_EngA [Bacillus cereus]                      | CPTF_Al         | 560016.1333 | 95155.17395 | 16.99150583 |
| UIJ67861.1 | ribosome-associated_GTPase_EngA [Bacillus cereus]                      | CPTF_Cd         | 421320.5333 | 119544.2731 | 28.37371163 |
| UIJ67861.1 | ribosome-associated_GTPase_EngA [Bacillus cereus]                      | CPTF_Co         | 662981.4    | 71549.8488  | 10.79213516 |
| UIJ67861.1 | ribosome-associated_GTPase_EngA [Bacillus cereus]                      | CPTF_Cu         | 737871.1    | 75716.12327 | 10.26142957 |
| UIJ67861.1 | ribosome-associated_GTPase_EngA [Bacillus cereus]                      | CPTF_Fe         | 481688.8333 | 248247.9436 | 51.53699368 |
| UIJ67861.1 | ribosome-associated_GTPase_EngA [Bacillus cereus]                      | CPTF_Mn         | 394723.5    | 57202.35602 | 14.49175335 |
| UIJ67861.1 | ribosome-associated_GTPase_EngA [Bacillus cereus]                      | CPTF_Ni         | 487517.1333 | 54562.23379 | 11.19185974 |
| UIJ67861.1 | ribosome-associated_GTPase_EngA [Bacillus cereus]                      | CPTF_U          | 470578.5333 | 66599.60751 | 14.15270838 |
| UIJ67861.1 | ribosome-associated_GTPase_EngA [Bacillus cereus]                      | CPTF_metals_mix | 908758.6333 | 196070.6926 | 21.57566217 |
| UIJ67861.1 | ribosome-associated_GTPase_EngA [Bacillus cereus]                      | CPTF_zcontrol   | 464620.2667 | 55710.50782 | 11.99054622 |
| UIJ67862.1 | NAD(P)H-dependent glycerol-3-phosphate dehydrogenase [Bacillus cereus] | CPTF_Al         | 898758.0667 | 56163.89131 | 6.249055601 |
| UIJ67862.1 | NAD(P)H-dependent glycerol-3-phosphate dehydrogenase [Bacillus cereus] | CPTF_Cd         | 711574.1667 | 289951.5024 | 40.74789615 |
| UIJ67862.1 | NAD(P)H-dependent glycerol-3-phosphate dehydrogenase [Bacillus cereus] | CPTF_Co         | 905560.3667 | 40585.14943 | 4.481771831 |
| UIJ67862.1 | NAD(P)H-dependent glycerol-3-phosphate dehydrogenase [Bacillus cereus] | CPTF_Cu         | 861988.2333 | 66702.47297 | 7.738211543 |
| UIJ67862.1 | NAD(P)H-dependent glycerol-3-phosphate dehydrogenase [Bacillus cereus] | CPTF_Fe         | 869710.2    | 38965.37085 | 4.480270652 |
| UIJ67862.1 | NAD(P)H-dependent glycerol-3-phosphate dehydrogenase [Bacillus cereus] | CPTF_Mn         | 785200.6667 | 96146.61522 | 12.24484636 |
| UIJ67862.1 | NAD(P)H-dependent glycerol-3-phosphate dehydrogenase [Bacillus cereus] | CPTF_Ni         | 735038.9667 | 47177.07324 | 6.418309148 |
| UIJ67862.1 | NAD(P)H-dependent glycerol-3-phosphate dehydrogenase [Bacillus cereus] | CPTF_U          | 801407.3333 | 56904.02208 | 7.100511777 |
| UIJ67862.1 | NAD(P)H-dependent glycerol-3-phosphate dehydrogenase [Bacillus cereus] | CPTF_metals_mix | 776330.0333 | 53586.57054 | 6.902550235 |
| UIJ67862.1 | NAD(P)H-dependent glycerol-3-phosphate dehydrogenase [Bacillus cereus] | CPTF_zcontrol   | 875054.2333 | 110509.9475 | 12.62892553 |
| UIJ67867.1 | HU_family_DNA-binding_protein [Bacillus cereus]                        | CPTF_Al         | 9094116.8   | 2627686.65  | 28.89435783 |
| UIJ67867.1 | HU_family_DNA-binding_protein [Bacillus cereus]                        | CPTF_Cd         | 16813520.7  | 2883979.328 | 17.15273903 |
| UIJ67867.1 | HU_family_DNA-binding_protein [Bacillus cereus]                        | CPTF_Co         | 8554098.353 | 2361631.156 | 27.60818334 |
| UIJ67867.1 | HU_family_DNA-binding_protein [Bacillus cereus]                        | CPTF_Cu         | 7196132.967 | 810710.372  | 11.26591707 |
| UIJ67867.1 | HU_family_DNA-binding_protein [Bacillus cereus]                        | CPTF_Fe         | 10974871.3  | 4837660.108 | 44.0794245  |
| UIJ67867.1 | HU_family_DNA-binding_protein [Bacillus cereus]                        | CPTF_Mn         | 16967978.1  | 15781063.91 | 93.0049757  |
| UIJ67867.1 | HU_family_DNA-binding_protein [Bacillus cereus]                        | CPTF_Ni         | 5175251.367 | 898109.9047 | 17.35393783 |
| UIJ67867.1 | HU_family_DNA-binding_protein [Bacillus cereus]                        | CPTF_U          | 6814155     | 933758.4898 | 13.70321764 |
| UIJ67867.1 | HU_family_DNA-binding_protein [Bacillus cereus]                        | CPTF_metals_mix | 68983270.07 | 8677261.026 | 12.57879051 |
| UIJ67867.1 | HU_family_DNA-binding_protein [Bacillus cereus]                        | CPTF_zcontrol   | 7657031.533 | 1344457.722 | 17.5584718  |
| UIJ67868.1 | GTP_cyclohydrolase_1_FoE [Bacillus cereus]                             | CPTF_Al         | 1558873.567 | 40133.49036 | 2.574518628 |
| UIJ67868.1 | GTP_cyclohydrolase_1_FoE [Bacillus cereus]                             | CPTF_Cd         | 1602595.6   | 50718.32591 | 3.164761335 |
| UIJ67868.1 | GTP_cyclohydrolase_1_FoE [Bacillus cereus]                             | CPTF_Co         | 1395674.933 | 98944.20792 | 7.089344772 |
| UIJ67868.1 | GTP_cyclohydrolase_1_FoE [Bacillus cereus]                             | CPTF_Cu         | 1521810.967 | 42443.8265  | 2.789034081 |
| UIJ67868.1 | GTP_cyclohydrolase_1_FoE [Bacillus cereus]                             | CPTF_Fe         | 1467764.767 | 85321.79479 | 5.813042848 |

|            |                                                                      |                 |             |             |             |
|------------|----------------------------------------------------------------------|-----------------|-------------|-------------|-------------|
| UIJ67868.1 | GTP_cyclohydrolase_I_FoE [Bacillus_cereus]                           | CPTF_Mn         | 1427920.367 | 104581.7133 | 7.324057823 |
| UIJ67868.1 | GTP_cyclohydrolase_I_FoE [Bacillus_cereus]                           | CPTF_Ni         | 1558111.267 | 106438.9289 | 6.83127907  |
| UIJ67868.1 | GTP_cyclohydrolase_I_FoE [Bacillus_cereus]                           | CPTF_U          | 1195072.067 | 260589.9418 | 21.80537468 |
| UIJ67868.1 | GTP_cyclohydrolase_I_FoE [Bacillus_cereus]                           | CPTF_metals_mix | 1660763.667 | 339688.4553 | 20.45375041 |
| UIJ67868.1 | GTP_cyclohydrolase_I_FoE [Bacillus_cereus]                           | CPTF_zcontrol   | 1541774.5   | 24237.56471 | 1.572056401 |
| UIJ67870.1 | 2-heptaprenyl-1,4-naphthoquinone_methyltransferase [Bacillus_cereus] | CPTF_Al         | 59820.26667 | 52135.27702 | 87.15320062 |
| UIJ67870.1 | 2-heptaprenyl-1,4-naphthoquinone_methyltransferase [Bacillus_cereus] | CPTF_Cd         | 72626.36667 | 23470.35229 | 32.31657229 |
| UIJ67870.1 | 2-heptaprenyl-1,4-naphthoquinone_methyltransferase [Bacillus_cereus] | CPTF_Co         | 85785.1     | 30355.12959 | 35.38508388 |
| UIJ67870.1 | 2-heptaprenyl-1,4-naphthoquinone_methyltransferase [Bacillus_cereus] | CPTF_Cu         | 69514.16667 | 96806.7171  | 139.2618537 |
| UIJ67870.1 | 2-heptaprenyl-1,4-naphthoquinone_methyltransferase [Bacillus_cereus] | CPTF_Fe         | 84260       | 8085.402419 | 9.595777853 |
| UIJ67870.1 | 2-heptaprenyl-1,4-naphthoquinone_methyltransferase [Bacillus_cereus] | CPTF_Mn         | 16392.13333 | 28392.00778 | 173.2050808 |
| UIJ67870.1 | 2-heptaprenyl-1,4-naphthoquinone_methyltransferase [Bacillus_cereus] | CPTF_Ni         | 113904.7667 | 126891.4948 | 111.4013913 |
| UIJ67870.1 | 2-heptaprenyl-1,4-naphthoquinone_methyltransferase [Bacillus_cereus] | CPTF_U          | 11762.4     | 20373.07442 | 173.2050808 |
| UIJ67870.1 | 2-heptaprenyl-1,4-naphthoquinone_methyltransferase [Bacillus_cereus] | CPTF_metals_mix | 220022      | 47389.4344  | 21.53849815 |
| UIJ67870.1 | 2-heptaprenyl-1,4-naphthoquinone_methyltransferase [Bacillus_cereus] | CPTF_zcontrol   | 30589.43333 | 52982.45271 | 173.2050808 |
| UIJ67872.1 | nucleoside-diphosphate_kinase [Bacillus_cereus]                      | CPTF_Al         | 12880150    | 789450.2377 | 6.129200652 |
| UIJ67872.1 | nucleoside-diphosphate_kinase [Bacillus_cereus]                      | CPTF_Cd         | 12742813.67 | 379061.8063 | 2.974710423 |
| UIJ67872.1 | nucleoside-diphosphate_kinase [Bacillus_cereus]                      | CPTF_Co         | 15492842.33 | 480080.4559 | 3.098724208 |
| UIJ67872.1 | nucleoside-diphosphate_kinase [Bacillus_cereus]                      | CPTF_Cu         | 11969233.33 | 573642.9662 | 4.792645863 |
| UIJ67872.1 | nucleoside-diphosphate_kinase [Bacillus_cereus]                      | CPTF_Fe         | 12648597.67 | 668214.3919 | 5.282912853 |
| UIJ67872.1 | nucleoside-diphosphate_kinase [Bacillus_cereus]                      | CPTF_Mn         | 12390011    | 1382883.055 | 11.16127383 |
| UIJ67872.1 | nucleoside-diphosphate_kinase [Bacillus_cereus]                      | CPTF_Ni         | 10609794.33 | 1028086.154 | 9.689972511 |
| UIJ67872.1 | nucleoside-diphosphate_kinase [Bacillus_cereus]                      | CPTF_U          | 11520820    | 520268.1838 | 4.515895429 |
| UIJ67872.1 | nucleoside-diphosphate_kinase [Bacillus_cereus]                      | CPTF_metals_mix | 14159494.4  | 357935.0041 | 2.527879838 |
| UIJ67872.1 | nucleoside-diphosphate_kinase [Bacillus_cereus]                      | CPTF_zcontrol   | 12375809    | 364491.2806 | 2.945191548 |
| UIJ67873.1 | chorismate_synthase [Bacillus_cereus]                                | CPTF_Al         | 44696.33333 | 77416.32025 | 173.2050808 |
| UIJ67873.1 | chorismate_synthase [Bacillus_cereus]                                | CPTF_Cd         | 0           | 0           | 0           |
| UIJ67873.1 | chorismate_synthase [Bacillus_cereus]                                | CPTF_Co         | 48632       | 84233.09487 | 173.2050808 |
| UIJ67873.1 | chorismate_synthase [Bacillus_cereus]                                | CPTF_Cu         | 145306.3333 | 127344.1669 | 87.63841463 |
| UIJ67873.1 | chorismate_synthase [Bacillus_cereus]                                | CPTF_Fe         | 62918.66667 | 108978.3274 | 173.2050808 |
| UIJ67873.1 | chorismate_synthase [Bacillus_cereus]                                | CPTF_Mn         | 0           | 0           | 0           |
| UIJ67873.1 | chorismate_synthase [Bacillus_cereus]                                | CPTF_Ni         | 72371.33333 | 125350.8263 | 173.2050808 |
| UIJ67873.1 | chorismate_synthase [Bacillus_cereus]                                | CPTF_U          | 0           | 0           | 0           |
| UIJ67873.1 | chorismate_synthase [Bacillus_cereus]                                | CPTF_metals_mix | 191609.6667 | 41937.42869 | 21.88690655 |
| UIJ67873.1 | chorismate_synthase [Bacillus_cereus]                                | CPTF_zcontrol   | 24246.16667 | 41995.59256 | 173.2050808 |
| UIJ67874.1 | 3-dehydroquinate_synthase [Bacillus_cereus]                          | CPTF_Al         | 0           | 0           | 0           |
| UIJ67874.1 | 3-dehydroquinate_synthase [Bacillus_cereus]                          | CPTF_Cd         | 391548.6667 | 370171.5825 | 94.54037621 |
| UIJ67874.1 | 3-dehydroquinate_synthase [Bacillus_cereus]                          | CPTF_Co         | 0           | 0           | 0           |
| UIJ67874.1 | 3-dehydroquinate_synthase [Bacillus_cereus]                          | CPTF_Cu         | 475717      | 415084.7744 | 87.25455983 |
| UIJ67874.1 | 3-dehydroquinate_synthase [Bacillus_cereus]                          | CPTF_Fe         | 410212      | 355399.8398 | 86.63808952 |
| UIJ67874.1 | 3-dehydroquinate_synthase [Bacillus_cereus]                          | CPTF_Mn         | 276903.3333 | 243365.1613 | 87.8881299  |
| UIJ67874.1 | 3-dehydroquinate_synthase [Bacillus_cereus]                          | CPTF_Ni         | 204541.6667 | 354276.5589 | 173.2050808 |
| UIJ67874.1 | 3-dehydroquinate_synthase [Bacillus_cereus]                          | CPTF_U          | 363173      | 316899.1216 | 87.25844751 |
| UIJ67874.1 | 3-dehydroquinate_synthase [Bacillus_cereus]                          | CPTF_metals_mix | 838805.4667 | 262449.5765 | 31.28849143 |
| UIJ67874.1 | 3-dehydroquinate_synthase [Bacillus_cereus]                          | CPTF_zcontrol   | 213760.3333 | 370243.758  | 173.2050808 |
| UIJ67875.1 | histidinol-phosphate_transaminase [Bacillus_cereus]                  | CPTF_Al         | 2797386.567 | 405706.2684 | 14.50304628 |
| UIJ67875.1 | histidinol-phosphate_transaminase [Bacillus_cereus]                  | CPTF_Cd         | 2917109     | 136309.2007 | 4.672749654 |
| UIJ67875.1 | histidinol-phosphate_transaminase [Bacillus_cereus]                  | CPTF_Co         | 2471567.3   | 123280.9398 | 4.987966131 |
| UIJ67875.1 | histidinol-phosphate_transaminase [Bacillus_cereus]                  | CPTF_Cu         | 2433357.1   | 168476.9083 | 6.923640936 |
| UIJ67875.1 | histidinol-phosphate_transaminase [Bacillus_cereus]                  | CPTF_Fe         | 2742034.3   | 170206.4393 | 6.20730526  |
| UIJ67875.1 | histidinol-phosphate_transaminase [Bacillus_cereus]                  | CPTF_Mn         | 2276576.667 | 510020.7452 | 22.40296813 |
| UIJ67875.1 | histidinol-phosphate_transaminase [Bacillus_cereus]                  | CPTF_Ni         | 2583745.133 | 157197.6213 | 6.084099368 |
| UIJ67875.1 | histidinol-phosphate_transaminase [Bacillus_cereus]                  | CPTF_U          | 2767328.3   | 116434.8279 | 4.207481559 |
| UIJ67875.1 | histidinol-phosphate_transaminase [Bacillus_cereus]                  | CPTF_metals_mix | 2681747     | 524957.9352 | 19.57522224 |
| UIJ67875.1 | histidinol-phosphate_transaminase [Bacillus_cereus]                  | CPTF_zcontrol   | 2681298.467 | 65970.38012 | 2.460389283 |
| UIJ67876.1 | tetratricopeptide_repeat_protein [Bacillus_cereus]                   | CPTF_Al         | 0           | 0           | 0           |
| UIJ67876.1 | tetratricopeptide_repeat_protein [Bacillus_cereus]                   | CPTF_Cd         | 0           | 0           | 0           |
| UIJ67876.1 | tetratricopeptide_repeat_protein [Bacillus_cereus]                   | CPTF_Co         | 0           | 0           | 0           |
| UIJ67876.1 | tetratricopeptide_repeat_protein [Bacillus_cereus]                   | CPTF_Cu         | 0           | 0           | 0           |
| UIJ67876.1 | tetratricopeptide_repeat_protein [Bacillus_cereus]                   | CPTF_Fe         | 0           | 0           | 0           |
| UIJ67876.1 | tetratricopeptide_repeat_protein [Bacillus_cereus]                   | CPTF_Mn         | 0           | 0           | 0           |

|            |                                                                         |                 |             |             |             |
|------------|-------------------------------------------------------------------------|-----------------|-------------|-------------|-------------|
| UIJ67876.1 | tetratricopeptide_repeat_protein_[Bacillus_cereus]                      | CPTF_Ni         | 0           | 0           | 0           |
| UIJ67876.1 | tetratricopeptide_repeat_protein_[Bacillus_cereus]                      | CPTF_U          | 0           | 0           | 0           |
| UIJ67876.1 | tetratricopeptide_repeat_protein_[Bacillus_cereus]                      | CPTF_metals_mix | 17302.7     | 18939.31541 | 109.4587284 |
| UIJ67876.1 | tetratricopeptide_repeat_protein_[Bacillus_cereus]                      | CPTF_zcontrol   | 0           | 0           | 0           |
| UIJ67878.1 | YpiF_family_protein_[Bacillus_cereus]                                   | CPTF_Al         | 288087      | 18937.56951 | 6.573559207 |
| UIJ67878.1 | YpiF_family_protein_[Bacillus_cereus]                                   | CPTF_Cd         | 230580      | 199721.0196 | 86.61680094 |
| UIJ67878.1 | YpiF_family_protein_[Bacillus_cereus]                                   | CPTF_Co         | 186022      | 161192.7172 | 86.65250198 |
| UIJ67878.1 | YpiF_family_protein_[Bacillus_cereus]                                   | CPTF_Cu         | 148569.6667 | 129548.4268 | 87.19709059 |
| UIJ67878.1 | YpiF_family_protein_[Bacillus_cereus]                                   | CPTF_Fe         | 283635.3333 | 37141.91781 | 13.09495449 |
| UIJ67878.1 | YpiF_family_protein_[Bacillus_cereus]                                   | CPTF_Mn         | 310896      | 11013.71422 | 3.542571864 |
| UIJ67878.1 | YpiF_family_protein_[Bacillus_cereus]                                   | CPTF_Ni         | 299623.3333 | 17962.77811 | 5.995119909 |
| UIJ67878.1 | YpiF_family_protein_[Bacillus_cereus]                                   | CPTF_U          | 310898.3333 | 31560.91229 | 10.15152186 |
| UIJ67878.1 | YpiF_family_protein_[Bacillus_cereus]                                   | CPTF_metals_mix | 66316.33333 | 114863.2587 | 173.2050808 |
| UIJ67878.1 | YpiF_family_protein_[Bacillus_cereus]                                   | CPTF_zcontrol   | 290211.3333 | 17136.53793 | 5.904847938 |
| UIJ67879.1 | menaquinol-cytochrome_c_reductase_iron-sulfur_subunit_[Bacillus_cereus] | CPTF_Al         | 185398.1333 | 106819.8938 | 57.61648832 |
| UIJ67879.1 | menaquinol-cytochrome_c_reductase_iron-sulfur_subunit_[Bacillus_cereus] | CPTF_Cd         | 339111.4667 | 131099.6949 | 38.65976464 |
| UIJ67879.1 | menaquinol-cytochrome_c_reductase_iron-sulfur_subunit_[Bacillus_cereus] | CPTF_Co         | 265298      | 50487.77899 | 19.03059163 |
| UIJ67879.1 | menaquinol-cytochrome_c_reductase_iron-sulfur_subunit_[Bacillus_cereus] | CPTF_Cu         | 246269.5667 | 141377.0389 | 57.40743398 |
| UIJ67879.1 | menaquinol-cytochrome_c_reductase_iron-sulfur_subunit_[Bacillus_cereus] | CPTF_Fe         | 270686.3333 | 91465.38927 | 33.79017631 |
| UIJ67879.1 | menaquinol-cytochrome_c_reductase_iron-sulfur_subunit_[Bacillus_cereus] | CPTF_Mn         | 254559.6667 | 44331.49574 | 17.41497242 |
| UIJ67879.1 | menaquinol-cytochrome_c_reductase_iron-sulfur_subunit_[Bacillus_cereus] | CPTF_Ni         | 372964      | 66605.52379 | 17.85843239 |
| UIJ67879.1 | menaquinol-cytochrome_c_reductase_iron-sulfur_subunit_[Bacillus_cereus] | CPTF_U          | 280616      | 53811.51206 | 19.17620886 |
| UIJ67879.1 | menaquinol-cytochrome_c_reductase_iron-sulfur_subunit_[Bacillus_cereus] | CPTF_metals_mix | 492401.6667 | 84345.38259 | 17.12938609 |
| UIJ67879.1 | menaquinol-cytochrome_c_reductase_iron-sulfur_subunit_[Bacillus_cereus] | CPTF_zcontrol   | 267996.3333 | 38145.94744 | 14.23375722 |
| UIJ67885.1 | zinc_metallopeptidase_[Bacillus_cereus]                                 | CPTF_Al         | 0           | 0           | 0           |
| UIJ67885.1 | zinc_metallopeptidase_[Bacillus_cereus]                                 | CPTF_Cd         | 0           | 0           | 0           |
| UIJ67885.1 | zinc_metallopeptidase_[Bacillus_cereus]                                 | CPTF_Co         | 0           | 0           | 0           |
| UIJ67885.1 | zinc_metallopeptidase_[Bacillus_cereus]                                 | CPTF_Cu         | 6442.5      | 11158.73733 | 173.2050808 |
| UIJ67885.1 | zinc_metallopeptidase_[Bacillus_cereus]                                 | CPTF_Fe         | 0           | 0           | 0           |
| UIJ67885.1 | zinc_metallopeptidase_[Bacillus_cereus]                                 | CPTF_Mn         | 0           | 0           | 0           |
| UIJ67885.1 | zinc_metallopeptidase_[Bacillus_cereus]                                 | CPTF_Ni         | 0           | 0           | 0           |
| UIJ67885.1 | zinc_metallopeptidase_[Bacillus_cereus]                                 | CPTF_U          | 0           | 0           | 0           |
| UIJ67885.1 | zinc_metallopeptidase_[Bacillus_cereus]                                 | CPTF_metals_mix | 27932.73333 | 11206.21101 | 40.11856224 |
| UIJ67885.1 | zinc_metallopeptidase_[Bacillus_cereus]                                 | CPTF_zcontrol   | 0           | 0           | 0           |
| UIJ67888.1 | dihydrodipicolinate_reductase_[Bacillus_cereus]                         | CPTF_Al         | 1134399     | 787.4287269 | 0.069413736 |
| UIJ67888.1 | dihydrodipicolinate_reductase_[Bacillus_cereus]                         | CPTF_Cd         | 1207035     | 121911.2546 | 10.10005961 |
| UIJ67888.1 | dihydrodipicolinate_reductase_[Bacillus_cereus]                         | CPTF_Co         | 1042279.633 | 151752.6464 | 14.55968643 |
| UIJ67888.1 | dihydrodipicolinate_reductase_[Bacillus_cereus]                         | CPTF_Cu         | 1283078.067 | 132489.2302 | 10.32589003 |
| UIJ67888.1 | dihydrodipicolinate_reductase_[Bacillus_cereus]                         | CPTF_Fe         | 1092124.667 | 123248.9522 | 11.28524572 |
| UIJ67888.1 | dihydrodipicolinate_reductase_[Bacillus_cereus]                         | CPTF_Mn         | 1031928.233 | 43261.02458 | 4.192251281 |
| UIJ67888.1 | dihydrodipicolinate_reductase_[Bacillus_cereus]                         | CPTF_Ni         | 909330.3333 | 106297.6427 | 11.68966203 |
| UIJ67888.1 | dihydrodipicolinate_reductase_[Bacillus_cereus]                         | CPTF_U          | 1115059     | 218002.8103 | 19.55078702 |
| UIJ67888.1 | dihydrodipicolinate_reductase_[Bacillus_cereus]                         | CPTF_metals_mix | 2170048.2   | 141045.03   | 6.4996266   |
| UIJ67888.1 | dihydrodipicolinate_reductase_[Bacillus_cereus]                         | CPTF_zcontrol   | 954465.3333 | 30460.70577 | 3.191389431 |
| UIJ67889.1 | methylglyoxal_synthase_[Bacillus_cereus]                                | CPTF_Al         | 0           | 0           | 0           |
| UIJ67889.1 | methylglyoxal_synthase_[Bacillus_cereus]                                | CPTF_Cd         | 0           | 0           | 0           |
| UIJ67889.1 | methylglyoxal_synthase_[Bacillus_cereus]                                | CPTF_Co         | 0           | 0           | 0           |
| UIJ67889.1 | methylglyoxal_synthase_[Bacillus_cereus]                                | CPTF_Cu         | 11887.46667 | 20589.69624 | 173.2050808 |
| UIJ67889.1 | methylglyoxal_synthase_[Bacillus_cereus]                                | CPTF_Fe         | 0           | 0           | 0           |
| UIJ67889.1 | methylglyoxal_synthase_[Bacillus_cereus]                                | CPTF_Mn         | 0           | 0           | 0           |
| UIJ67889.1 | methylglyoxal_synthase_[Bacillus_cereus]                                | CPTF_Ni         | 0           | 0           | 0           |
| UIJ67889.1 | methylglyoxal_synthase_[Bacillus_cereus]                                | CPTF_U          | 0           | 0           | 0           |
| UIJ67889.1 | methylglyoxal_synthase_[Bacillus_cereus]                                | CPTF_metals_mix | 12572.83333 | 12812.89361 | 101.909357  |
| UIJ67889.1 | methylglyoxal_synthase_[Bacillus_cereus]                                | CPTF_zcontrol   | 0           | 0           | 0           |
| UIJ67893.1 | biotin--[acetyl-CoA-carboxylase]_ligase_[Bacillus_cereus]               | CPTF_Al         | 72859.96667 | 20709.9444  | 28.42431221 |
| UIJ67893.1 | biotin--[acetyl-CoA-carboxylase]_ligase_[Bacillus_cereus]               | CPTF_Cd         | 0           | 0           | 0           |
| UIJ67893.1 | biotin--[acetyl-CoA-carboxylase]_ligase_[Bacillus_cereus]               | CPTF_Co         | 68403.86667 | 23513.03237 | 34.37383516 |
| UIJ67893.1 | biotin--[acetyl-CoA-carboxylase]_ligase_[Bacillus_cereus]               | CPTF_Cu         | 39642.16667 | 42347.80086 | 106.8251421 |
| UIJ67893.1 | biotin--[acetyl-CoA-carboxylase]_ligase_[Bacillus_cereus]               | CPTF_Fe         | 50261.2     | 63484.65187 | 126.3094631 |
| UIJ67893.1 | biotin--[acetyl-CoA-carboxylase]_ligase_[Bacillus_cereus]               | CPTF_Mn         | 23030.2     | 39889.47651 | 173.2050808 |
| UIJ67893.1 | biotin--[acetyl-CoA-carboxylase]_ligase_[Bacillus_cereus]               | CPTF_Ni         | 68912       | 12929.07026 | 18.76171096 |

|            |                                                                    |                 |             |             |             |
|------------|--------------------------------------------------------------------|-----------------|-------------|-------------|-------------|
| UIJ67893.1 | biotin--[acetyl-CoA-carboxylase]_ligase_[Bacillus_cereus]          | CPTF_U          | 46913       | 19763.82096 | 42.12866574 |
| UIJ67893.1 | biotin--[acetyl-CoA-carboxylase]_ligase_[Bacillus_cereus]          | CPTF_metals_mix | 26248.13333 | 45463.10054 | 173.2050808 |
| UIJ67893.1 | biotin--[acetyl-CoA-carboxylase]_ligase_[Bacillus_cereus]          | CPTF_zcontrol   | 0           | 0           | 0           |
| UIJ67895.1 | 3-methyl-2-oxobutanoate_hydroxymethyltransferase_[Bacillus_cereus] | CPTF_Al         | 0           | 0           | 0           |
| UIJ67895.1 | 3-methyl-2-oxobutanoate_hydroxymethyltransferase_[Bacillus_cereus] | CPTF_Cd         | 0           | 0           | 0           |
| UIJ67895.1 | 3-methyl-2-oxobutanoate_hydroxymethyltransferase_[Bacillus_cereus] | CPTF_Co         | 72219.66667 | 62571.91073 | 86.641096   |
| UIJ67895.1 | 3-methyl-2-oxobutanoate_hydroxymethyltransferase_[Bacillus_cereus] | CPTF_Cu         | 19433.2     | 33659.28975 | 173.2050808 |
| UIJ67895.1 | 3-methyl-2-oxobutanoate_hydroxymethyltransferase_[Bacillus_cereus] | CPTF_Fe         | 0           | 0           | 0           |
| UIJ67895.1 | 3-methyl-2-oxobutanoate_hydroxymethyltransferase_[Bacillus_cereus] | CPTF_Mn         | 34818.33333 | 60307.12237 | 173.2050808 |
| UIJ67895.1 | 3-methyl-2-oxobutanoate_hydroxymethyltransferase_[Bacillus_cereus] | CPTF_Ni         | 0           | 0           | 0           |
| UIJ67895.1 | 3-methyl-2-oxobutanoate_hydroxymethyltransferase_[Bacillus_cereus] | CPTF_U          | 0           | 0           | 0           |
| UIJ67895.1 | 3-methyl-2-oxobutanoate_hydroxymethyltransferase_[Bacillus_cereus] | CPTF_metals_mix | 56886.46667 | 26806.24794 | 47.1223641  |
| UIJ67895.1 | 3-methyl-2-oxobutanoate_hydroxymethyltransferase_[Bacillus_cereus] | CPTF_zcontrol   | 0           | 0           | 0           |
| UIJ67896.1 | pantoate--beta-alanine_ligase_[Bacillus_cereus]                    | CPTF_Al         | 137112.6333 | 118963.2972 | 86.76319193 |
| UIJ67896.1 | pantoate--beta-alanine_ligase_[Bacillus_cereus]                    | CPTF_Cd         | 95020.83333 | 39891.98185 | 41.98235319 |
| UIJ67896.1 | pantoate--beta-alanine_ligase_[Bacillus_cereus]                    | CPTF_Co         | 66484.93333 | 63694.71838 | 95.8032372  |
| UIJ67896.1 | pantoate--beta-alanine_ligase_[Bacillus_cereus]                    | CPTF_Cu         | 49104.1     | 42698.9646  | 86.95600694 |
| UIJ67896.1 | pantoate--beta-alanine_ligase_[Bacillus_cereus]                    | CPTF_Fe         | 74596.46667 | 52174.49053 | 69.94230808 |
| UIJ67896.1 | pantoate--beta-alanine_ligase_[Bacillus_cereus]                    | CPTF_Mn         | 40331.76667 | 35789.06838 | 88.73667418 |
| UIJ67896.1 | pantoate--beta-alanine_ligase_[Bacillus_cereus]                    | CPTF_Ni         | 82574.66667 | 71575.96414 | 86.68029437 |
| UIJ67896.1 | pantoate--beta-alanine_ligase_[Bacillus_cereus]                    | CPTF_U          | 98856.33333 | 171224.192  | 173.2050808 |
| UIJ67896.1 | pantoate--beta-alanine_ligase_[Bacillus_cereus]                    | CPTF_metals_mix | 19832.7     | 34351.24405 | 173.2050808 |
| UIJ67896.1 | pantoate--beta-alanine_ligase_[Bacillus_cereus]                    | CPTF_zcontrol   | 36335       | 62934.06609 | 173.2050808 |
| UIJ67899.1 | YpmA_family_protein_[Bacillus_cereus]                              | CPTF_Al         | 106037.5333 | 130035.5571 | 122.6316315 |
| UIJ67899.1 | YpmA_family_protein_[Bacillus_cereus]                              | CPTF_Cd         | 135978.3333 | 118223.2236 | 86.94269208 |
| UIJ67899.1 | YpmA_family_protein_[Bacillus_cereus]                              | CPTF_Co         | 95193.33333 | 164879.6899 | 173.2050808 |
| UIJ67899.1 | YpmA_family_protein_[Bacillus_cereus]                              | CPTF_Cu         | 160783      | 140546.5173 | 87.41379208 |
| UIJ67899.1 | YpmA_family_protein_[Bacillus_cereus]                              | CPTF_Fe         | 16217.8     | 28090.05359 | 173.2050808 |
| UIJ67899.1 | YpmA_family_protein_[Bacillus_cereus]                              | CPTF_Mn         | 80577.33333 | 69642.01921 | 86.4287962  |
| UIJ67899.1 | YpmA_family_protein_[Bacillus_cereus]                              | CPTF_Ni         | 208602      | 69972.99546 | 33.54377976 |
| UIJ67899.1 | YpmA_family_protein_[Bacillus_cereus]                              | CPTF_U          | 76726.33333 | 132893.9076 | 173.2050808 |
| UIJ67899.1 | YpmA_family_protein_[Bacillus_cereus]                              | CPTF_metals_mix | 120602.3333 | 104485.7602 | 86.6365992  |
| UIJ67899.1 | YpmA_family_protein_[Bacillus_cereus]                              | CPTF_zcontrol   | 93755.66667 | 83360.38496 | 88.9123697  |
| UIJ67901.1 | aspartate_transaminase_AspB_[Bacillus_cereus]                      | CPTF_Al         | 795098.4333 | 100380.4905 | 12.62491363 |
| UIJ67901.1 | aspartate_transaminase_AspB_[Bacillus_cereus]                      | CPTF_Cd         | 811105      | 70377.4593  | 8.676738437 |
| UIJ67901.1 | aspartate_transaminase_AspB_[Bacillus_cereus]                      | CPTF_Co         | 904111.6333 | 192666.4003 | 21.31002337 |
| UIJ67901.1 | aspartate_transaminase_AspB_[Bacillus_cereus]                      | CPTF_Cu         | 947098.5667 | 91389.17954 | 9.649384209 |
| UIJ67901.1 | aspartate_transaminase_AspB_[Bacillus_cereus]                      | CPTF_Fe         | 672661.6667 | 156006.5935 | 23.19243109 |
| UIJ67901.1 | aspartate_transaminase_AspB_[Bacillus_cereus]                      | CPTF_Mn         | 863614.1667 | 724794.0667 | 83.92568055 |
| UIJ67901.1 | aspartate_transaminase_AspB_[Bacillus_cereus]                      | CPTF_Ni         | 504183.4    | 226986.6093 | 45.02064314 |
| UIJ67901.1 | aspartate_transaminase_AspB_[Bacillus_cereus]                      | CPTF_U          | 410080.7333 | 42599.5136  | 10.38807975 |
| UIJ67901.1 | aspartate_transaminase_AspB_[Bacillus_cereus]                      | CPTF_metals_mix | 3630320.667 | 346754.1619 | 9.551612481 |
| UIJ67901.1 | aspartate_transaminase_AspB_[Bacillus_cereus]                      | CPTF_zcontrol   | 615831.2667 | 27341.21169 | 4.43972451  |
| UIJ67905.1 | PBP1A_family_penicillin-binding_protein_[Bacillus_cereus]          | CPTF_Al         | 44743.33333 | 77497.72663 | 173.2050808 |
| UIJ67905.1 | PBP1A_family_penicillin-binding_protein_[Bacillus_cereus]          | CPTF_Cd         | 55418       | 95986.79165 | 173.2050808 |
| UIJ67905.1 | PBP1A_family_penicillin-binding_protein_[Bacillus_cereus]          | CPTF_Co         | 122244.5667 | 81996.44324 | 67.07573635 |
| UIJ67905.1 | PBP1A_family_penicillin-binding_protein_[Bacillus_cereus]          | CPTF_Cu         | 112641.7667 | 56893.41236 | 50.50827419 |
| UIJ67905.1 | PBP1A_family_penicillin-binding_protein_[Bacillus_cereus]          | CPTF_Fe         | 98920.33333 | 91396.81948 | 92.3943707  |
| UIJ67905.1 | PBP1A_family_penicillin-binding_protein_[Bacillus_cereus]          | CPTF_Mn         | 112267.3333 | 109901.3114 | 97.89251078 |
| UIJ67905.1 | PBP1A_family_penicillin-binding_protein_[Bacillus_cereus]          | CPTF_Ni         | 180916.3333 | 160242.0164 | 88.57244308 |
| UIJ67905.1 | PBP1A_family_penicillin-binding_protein_[Bacillus_cereus]          | CPTF_U          | 99055.2     | 171568.6392 | 173.2050808 |
| UIJ67905.1 | PBP1A_family_penicillin-binding_protein_[Bacillus_cereus]          | CPTF_metals_mix | 39141.83333 | 36726.6639  | 93.82969772 |
| UIJ67905.1 | PBP1A_family_penicillin-binding_protein_[Bacillus_cereus]          | CPTF_zcontrol   | 51720.33333 | 89582.24512 | 173.2050808 |
| UIJ67914.1 | cell_division_regulator_GpsB_[Bacillus_cereus]                     | CPTF_Al         | 357661.5    | 320113.0039 | 89.50166677 |
| UIJ67914.1 | cell_division_regulator_GpsB_[Bacillus_cereus]                     | CPTF_Cd         | 561845.2333 | 168205.2219 | 29.93799928 |
| UIJ67914.1 | cell_division_regulator_GpsB_[Bacillus_cereus]                     | CPTF_Co         | 159887.7333 | 104950.8447 | 65.64033557 |
| UIJ67914.1 | cell_division_regulator_GpsB_[Bacillus_cereus]                     | CPTF_Cu         | 175594.6333 | 99822.34434 | 56.84817494 |
| UIJ67914.1 | cell_division_regulator_GpsB_[Bacillus_cereus]                     | CPTF_Fe         | 213000.4333 | 156070.185  | 73.27223824 |
| UIJ67914.1 | cell_division_regulator_GpsB_[Bacillus_cereus]                     | CPTF_Mn         | 378631.6667 | 347175.4537 | 91.69213362 |
| UIJ67914.1 | cell_division_regulator_GpsB_[Bacillus_cereus]                     | CPTF_Ni         | 0           | 0           | 0           |
| UIJ67914.1 | cell_division_regulator_GpsB_[Bacillus_cereus]                     | CPTF_U          | 76815       | 133047.4828 | 173.2050808 |

|            |                                                               |                 |             |             |             |
|------------|---------------------------------------------------------------|-----------------|-------------|-------------|-------------|
| UIJ67914.1 | cell_division_regulator_GpsB_[Bacillus_cereus]                | CPTF_metals_mix | 869724.5    | 23093.10359 | 2.655220542 |
| UIJ67914.1 | cell_division_regulator_GpsB_[Bacillus_cereus]                | CPTF_zcontrol   | 162182.6667 | 117490.2342 | 72.44315103 |
| UIJ67915.1 | class_I_SAM-dependent_RNA_methyltransferase_[Bacillus_cereus] | CPTF_Al         | 954465.7    | 154077.9172 | 16.14284486 |
| UIJ67915.1 | class_I_SAM-dependent_RNA_methyltransferase_[Bacillus_cereus] | CPTF_Cd         | 1177886.2   | 128484.6497 | 10.90806987 |
| UIJ67915.1 | class_I_SAM-dependent_RNA_methyltransferase_[Bacillus_cereus] | CPTF_Co         | 809235.4667 | 59045.79533 | 7.296491289 |
| UIJ67915.1 | class_I_SAM-dependent_RNA_methyltransferase_[Bacillus_cereus] | CPTF_Cu         | 521377.6667 | 173900.4858 | 31.53926906 |
| UIJ67915.1 | class_I_SAM-dependent_RNA_methyltransferase_[Bacillus_cereus] | CPTF_Fe         | 1159071.6   | 378713.3932 | 32.67385666 |
| UIJ67915.1 | class_I_SAM-dependent_RNA_methyltransferase_[Bacillus_cereus] | CPTF_Mn         | 882734.8667 | 137305.2036 | 15.55452365 |
| UIJ67915.1 | class_I_SAM-dependent_RNA_methyltransferase_[Bacillus_cereus] | CPTF_Ni         | 231065.1    | 275359.405  | 119.1696214 |
| UIJ67915.1 | class_I_SAM-dependent_RNA_methyltransferase_[Bacillus_cereus] | CPTF_U          | 74968.43333 | 39350.54339 | 52.48948343 |
| UIJ67915.1 | class_I_SAM-dependent_RNA_methyltransferase_[Bacillus_cereus] | CPTF_metals_mix | 520320.5667 | 103827.7429 | 19.95457215 |
| UIJ67915.1 | class_I_SAM-dependent_RNA_methyltransferase_[Bacillus_cereus] | CPTF_zcontrol   | 749327.8    | 254035.5525 | 33.90179205 |
| UIJ67917.1 | ATP-dependent_DNA_helicase_[Bacillus_cereus]                  | CPTF_Al         | 263841.4    | 179556.6592 | 68.05477048 |
| UIJ67917.1 | ATP-dependent_DNA_helicase_[Bacillus_cereus]                  | CPTF_Cd         | 264153.2333 | 84437.17403 | 31.96522449 |
| UIJ67917.1 | ATP-dependent_DNA_helicase_[Bacillus_cereus]                  | CPTF_Co         | 258620.7    | 211390.7663 | 81.73775968 |
| UIJ67917.1 | ATP-dependent_DNA_helicase_[Bacillus_cereus]                  | CPTF_Cu         | 198346.3667 | 180761.0699 | 91.13404642 |
| UIJ67917.1 | ATP-dependent_DNA_helicase_[Bacillus_cereus]                  | CPTF_Fe         | 264906.4    | 68942.63918 | 26.02528258 |
| UIJ67917.1 | ATP-dependent_DNA_helicase_[Bacillus_cereus]                  | CPTF_Mn         | 181433.2    | 201998.9322 | 111.3351538 |
| UIJ67917.1 | ATP-dependent_DNA_helicase_[Bacillus_cereus]                  | CPTF_Ni         | 257140.2667 | 177923.686  | 69.19324161 |
| UIJ67917.1 | ATP-dependent_DNA_helicase_[Bacillus_cereus]                  | CPTF_U          | 407029.3333 | 145932.4968 | 35.85306632 |
| UIJ67917.1 | ATP-dependent_DNA_helicase_[Bacillus_cereus]                  | CPTF_metals_mix | 77463.1     | 134170.0249 | 173.2050808 |
| UIJ67917.1 | ATP-dependent_DNA_helicase_[Bacillus_cereus]                  | CPTF_zcontrol   | 377675.3333 | 72696.70726 | 19.24846577 |
| UIJ67918.1 | carboxypeptidase_[Bacillus_cereus]                            | CPTF_Al         | 1021518.933 | 291168.914  | 28.50352592 |
| UIJ67918.1 | carboxypeptidase_[Bacillus_cereus]                            | CPTF_Cd         | 1150135.9   | 158834.8689 | 13.81009574 |
| UIJ67918.1 | carboxypeptidase_[Bacillus_cereus]                            | CPTF_Co         | 1102662.167 | 50165.3748  | 4.549478192 |
| UIJ67918.1 | carboxypeptidase_[Bacillus_cereus]                            | CPTF_Cu         | 944631.8    | 196917.6759 | 20.84597151 |
| UIJ67918.1 | carboxypeptidase_[Bacillus_cereus]                            | CPTF_Fe         | 954032.2667 | 216765.6689 | 22.72099975 |
| UIJ67918.1 | carboxypeptidase_[Bacillus_cereus]                            | CPTF_Mn         | 748019.2667 | 155782.4934 | 20.82600012 |
| UIJ67918.1 | carboxypeptidase_[Bacillus_cereus]                            | CPTF_Ni         | 334793.4    | 278049.3874 | 83.05103606 |
| UIJ67918.1 | carboxypeptidase_[Bacillus_cereus]                            | CPTF_U          | 345191.2667 | 325413.2787 | 94.2704263  |
| UIJ67918.1 | carboxypeptidase_[Bacillus_cereus]                            | CPTF_metals_mix | 1331293.967 | 352361.6262 | 26.46760482 |
| UIJ67918.1 | carboxypeptidase_[Bacillus_cereus]                            | CPTF_zcontrol   | 593488.1667 | 123127.8885 | 20.74647742 |
| UIJ67919.1 | GNAT_family_N-acetyltransferase_[Bacillus_cereus]             | CPTF_Al         | 48227.1     | 45322.32256 | 93.97687723 |
| UIJ67919.1 | GNAT_family_N-acetyltransferase_[Bacillus_cereus]             | CPTF_Cd         | 16978.26667 | 29407.22049 | 173.2050808 |
| UIJ67919.1 | GNAT_family_N-acetyltransferase_[Bacillus_cereus]             | CPTF_Co         | 51556.2     | 12913.87435 | 25.04815008 |
| UIJ67919.1 | GNAT_family_N-acetyltransferase_[Bacillus_cereus]             | CPTF_Cu         | 54066.56667 | 20837.85052 | 38.54110184 |
| UIJ67919.1 | GNAT_family_N-acetyltransferase_[Bacillus_cereus]             | CPTF_Fe         | 20326.93333 | 35207.2813  | 173.2050808 |
| UIJ67919.1 | GNAT_family_N-acetyltransferase_[Bacillus_cereus]             | CPTF_Mn         | 33174.73333 | 28787.75717 | 86.77615244 |
| UIJ67919.1 | GNAT_family_N-acetyltransferase_[Bacillus_cereus]             | CPTF_Ni         | 52548.5     | 12449.21503 | 23.69090464 |
| UIJ67919.1 | GNAT_family_N-acetyltransferase_[Bacillus_cereus]             | CPTF_U          | 16839.5     | 29166.86957 | 173.2050808 |
| UIJ67919.1 | GNAT_family_N-acetyltransferase_[Bacillus_cereus]             | CPTF_metals_mix | 0           | 0           | 0           |
| UIJ67919.1 | GNAT_family_N-acetyltransferase_[Bacillus_cereus]             | CPTF_zcontrol   | 65682.46667 | 19099.60936 | 29.07870293 |
| UIJ67921.1 | xanthine_phosphoribosyltransferase_[Bacillus_cereus]          | CPTF_Al         | 220221.0333 | 72604.18027 | 32.96877649 |
| UIJ67921.1 | xanthine_phosphoribosyltransferase_[Bacillus_cereus]          | CPTF_Cd         | 160816.7333 | 56790.60839 | 35.31386766 |
| UIJ67921.1 | xanthine_phosphoribosyltransferase_[Bacillus_cereus]          | CPTF_Co         | 241467.6333 | 36239.64156 | 15.00807419 |
| UIJ67921.1 | xanthine_phosphoribosyltransferase_[Bacillus_cereus]          | CPTF_Cu         | 171603.8333 | 73835.54755 | 43.0267472  |
| UIJ67921.1 | xanthine_phosphoribosyltransferase_[Bacillus_cereus]          | CPTF_Fe         | 123187      | 14508.8942  | 11.77794264 |
| UIJ67921.1 | xanthine_phosphoribosyltransferase_[Bacillus_cereus]          | CPTF_Mn         | 135758.2    | 32357.30877 | 23.83451517 |
| UIJ67921.1 | xanthine_phosphoribosyltransferase_[Bacillus_cereus]          | CPTF_Ni         | 29865.63333 | 51728.79433 | 173.2050808 |
| UIJ67921.1 | xanthine_phosphoribosyltransferase_[Bacillus_cereus]          | CPTF_U          | 33840       | 58612.59933 | 173.2050808 |
| UIJ67921.1 | xanthine_phosphoribosyltransferase_[Bacillus_cereus]          | CPTF_metals_mix | 135301.4    | 101491.1733 | 75.01117748 |
| UIJ67921.1 | xanthine_phosphoribosyltransferase_[Bacillus_cereus]          | CPTF_zcontrol   | 199634.2    | 127745.9898 | 63.99003269 |
| UIJ67923.1 | dynamin_family_protein_[Bacillus_cereus]                      | CPTF_Al         | 89964.66667 | 82713.45066 | 91.939929   |
| UIJ67923.1 | dynamin_family_protein_[Bacillus_cereus]                      | CPTF_Cd         | 81595.33333 | 73740.2936  | 90.37317526 |
| UIJ67923.1 | dynamin_family_protein_[Bacillus_cereus]                      | CPTF_Co         | 122722      | 107276.3255 | 87.41409489 |
| UIJ67923.1 | dynamin_family_protein_[Bacillus_cereus]                      | CPTF_Cu         | 120640.6667 | 108849.7054 | 90.2263792  |
| UIJ67923.1 | dynamin_family_protein_[Bacillus_cereus]                      | CPTF_Fe         | 44343.66667 | 76805.48366 | 173.2050808 |
| UIJ67923.1 | dynamin_family_protein_[Bacillus_cereus]                      | CPTF_Mn         | 0           | 0           | 0           |
| UIJ67923.1 | dynamin_family_protein_[Bacillus_cereus]                      | CPTF_Ni         | 55097.33333 | 95431.38069 | 173.2050808 |
| UIJ67923.1 | dynamin_family_protein_[Bacillus_cereus]                      | CPTF_U          | 44927.33333 | 77816.42398 | 173.2050808 |
| UIJ67923.1 | dynamin_family_protein_[Bacillus_cereus]                      | CPTF_metals_mix | 50593.66667 | 87630.80121 | 173.2050808 |



|            |                                                     |                 |             |             |             |
|------------|-----------------------------------------------------|-----------------|-------------|-------------|-------------|
| UIJ67923.1 | dynamain_family_protein_[Bacillus_cereus]           | CPTF_zcontrol   | 119229.6333 | 36100.58217 | 30.27819608 |
| UIJ67925.1 | GNAT_family_N-acetyltransferase_[Bacillus_cereus]   | CPTF_Al         | 115990.3333 | 100754.0792 | 86.86420353 |
| UIJ67925.1 | GNAT_family_N-acetyltransferase_[Bacillus_cereus]   | CPTF_Cd         | 39150.66667 | 67810.94382 | 173.2050808 |
| UIJ67925.1 | GNAT_family_N-acetyltransferase_[Bacillus_cereus]   | CPTF_Co         | 152327      | 7051.780839 | 4.629370262 |
| UIJ67925.1 | GNAT_family_N-acetyltransferase_[Bacillus_cereus]   | CPTF_Cu         | 172303.3333 | 34399.33612 | 19.96440548 |
| UIJ67925.1 | GNAT_family_N-acetyltransferase_[Bacillus_cereus]   | CPTF_Fe         | 64317       | 111400.3118 | 173.2050808 |
| UIJ67925.1 | GNAT_family_N-acetyltransferase_[Bacillus_cereus]   | CPTF_Mn         | 56180.3     | 65543.27409 | 116.6659382 |
| UIJ67925.1 | GNAT_family_N-acetyltransferase_[Bacillus_cereus]   | CPTF_Ni         | 47670.66667 | 82568.0167  | 173.2050808 |
| UIJ67925.1 | GNAT_family_N-acetyltransferase_[Bacillus_cereus]   | CPTF_U          | 117542.6333 | 43347.24163 | 36.87788882 |
| UIJ67925.1 | GNAT_family_N-acetyltransferase_[Bacillus_cereus]   | CPTF_metals_mix | 17863.06667 | 30939.73905 | 173.2050808 |
| UIJ67925.1 | GNAT_family_N-acetyltransferase_[Bacillus_cereus]   | CPTF_zcontrol   | 108989.0667 | 15926.7912  | 14.61320083 |
| UIJ67926.1 | YpbS_family_protein_[Bacillus_cereus]               | CPTF_Al         | 281215.0333 | 8245.682466 | 2.932162754 |
| UIJ67926.1 | YpbS_family_protein_[Bacillus_cereus]               | CPTF_Cd         | 233436.5333 | 47457.39627 | 20.32989249 |
| UIJ67926.1 | YpbS_family_protein_[Bacillus_cereus]               | CPTF_Co         | 297591.7    | 41640.60657 | 13.99252955 |
| UIJ67926.1 | YpbS_family_protein_[Bacillus_cereus]               | CPTF_Cu         | 244580.0333 | 25173.30723 | 10.2924621  |
| UIJ67926.1 | YpbS_family_protein_[Bacillus_cereus]               | CPTF_Fe         | 280605.2667 | 39652.47826 | 14.13105275 |
| UIJ67926.1 | YpbS_family_protein_[Bacillus_cereus]               | CPTF_Mn         | 161461.9    | 82083.99443 | 50.8379961  |
| UIJ67926.1 | YpbS_family_protein_[Bacillus_cereus]               | CPTF_Ni         | 267444.3333 | 46156.15646 | 17.25822936 |
| UIJ67926.1 | YpbS_family_protein_[Bacillus_cereus]               | CPTF_U          | 66438       | 115073.9916 | 173.2050808 |
| UIJ67926.1 | YpbS_family_protein_[Bacillus_cereus]               | CPTF_metals_mix | 218532.5333 | 17603.44877 | 8.055298908 |
| UIJ67926.1 | YpbS_family_protein_[Bacillus_cereus]               | CPTF_zcontrol   | 209981.9    | 106138.9962 | 50.54673578 |
| UIJ67927.1 | sulfurtransferase_[Bacillus_cereus]                 | CPTF_Al         | 2023276     | 318151.8297 | 15.65418159 |
| UIJ67927.1 | sulfurtransferase_[Bacillus_cereus]                 | CPTF_Cd         | 2044784.4   | 158832.5478 | 7.767691685 |
| UIJ67927.1 | sulfurtransferase_[Bacillus_cereus]                 | CPTF_Co         | 2273567.667 | 92884.07966 | 4.085388837 |
| UIJ67927.1 | sulfurtransferase_[Bacillus_cereus]                 | CPTF_Cu         | 2175359     | 223142.7595 | 10.2577441  |
| UIJ67927.1 | sulfurtransferase_[Bacillus_cereus]                 | CPTF_Fe         | 2120031.1   | 121036.5467 | 5.709187317 |
| UIJ67927.1 | sulfurtransferase_[Bacillus_cereus]                 | CPTF_Mn         | 1605501.333 | 462449.0001 | 28.80402467 |
| UIJ67927.1 | sulfurtransferase_[Bacillus_cereus]                 | CPTF_Ni         | 1667897.333 | 473391.7743 | 28.38254878 |
| UIJ67927.1 | sulfurtransferase_[Bacillus_cereus]                 | CPTF_U          | 1972024.067 | 205139.6509 | 10.4024926  |
| UIJ67927.1 | sulfurtransferase_[Bacillus_cereus]                 | CPTF_metals_mix | 2098491.733 | 72559.37606 | 3.457691775 |
| UIJ67927.1 | sulfurtransferase_[Bacillus_cereus]                 | CPTF_zcontrol   | 1958385.7   | 13177.43631 | 0.672872372 |
| UIJ67945.1 | cysteine_hydrolase_[Bacillus_cereus]                | CPTF_Al         | 387640.0667 | 23863.83086 | 6.156182735 |
| UIJ67945.1 | cysteine_hydrolase_[Bacillus_cereus]                | CPTF_Cd         | 270239.8    | 187320.5196 | 69.316407   |
| UIJ67945.1 | cysteine_hydrolase_[Bacillus_cereus]                | CPTF_Co         | 329975.6667 | 120336.8046 | 36.46838745 |
| UIJ67945.1 | cysteine_hydrolase_[Bacillus_cereus]                | CPTF_Cu         | 117222      | 203034.4598 | 173.2050808 |
| UIJ67945.1 | cysteine_hydrolase_[Bacillus_cereus]                | CPTF_Fe         | 226063      | 208103.347  | 92.0554655  |
| UIJ67945.1 | cysteine_hydrolase_[Bacillus_cereus]                | CPTF_Mn         | 438597.6667 | 33348.24555 | 7.603379609 |
| UIJ67945.1 | cysteine_hydrolase_[Bacillus_cereus]                | CPTF_Ni         | 142374      | 246599.0017 | 173.2050808 |
| UIJ67945.1 | cysteine_hydrolase_[Bacillus_cereus]                | CPTF_U          | 422058      | 63255.95113 | 14.98750198 |
| UIJ67945.1 | cysteine_hydrolase_[Bacillus_cereus]                | CPTF_metals_mix | 51472.36667 | 18931.76514 | 36.78044428 |
| UIJ67945.1 | cysteine_hydrolase_[Bacillus_cereus]                | CPTF_zcontrol   | 343757.8333 | 300599.0503 | 87.44500377 |
| UIJ67949.1 | aldose_1-epimerase_family_protein_[Bacillus_cereus] | CPTF_Al         | 90761.23333 | 32140.56553 | 35.41221769 |
| UIJ67949.1 | aldose_1-epimerase_family_protein_[Bacillus_cereus] | CPTF_Cd         | 81423.13333 | 86919.25688 | 106.7500762 |
| UIJ67949.1 | aldose_1-epimerase_family_protein_[Bacillus_cereus] | CPTF_Co         | 100377.0667 | 21728.61435 | 21.64699077 |
| UIJ67949.1 | aldose_1-epimerase_family_protein_[Bacillus_cereus] | CPTF_Cu         | 123444.4667 | 76484.97567 | 61.95901504 |
| UIJ67949.1 | aldose_1-epimerase_family_protein_[Bacillus_cereus] | CPTF_Fe         | 156557.8    | 46631.05391 | 29.78520004 |
| UIJ67949.1 | aldose_1-epimerase_family_protein_[Bacillus_cereus] | CPTF_Mn         | 51930       | 45505.11623 | 87.62779941 |
| UIJ67949.1 | aldose_1-epimerase_family_protein_[Bacillus_cereus] | CPTF_Ni         | 147516      | 51919.17609 | 35.19562358 |
| UIJ67949.1 | aldose_1-epimerase_family_protein_[Bacillus_cereus] | CPTF_U          | 59652.96667 | 103321.9691 | 173.2050808 |
| UIJ67949.1 | aldose_1-epimerase_family_protein_[Bacillus_cereus] | CPTF_metals_mix | 124289.6    | 33602.97924 | 27.03603459 |
| UIJ67949.1 | aldose_1-epimerase_family_protein_[Bacillus_cereus] | CPTF_zcontrol   | 82546.86667 | 12278.14277 | 14.87414758 |
| UIJ67954.1 | cold_shock-like_protein_CspB_[Bacillus_cereus]      | CPTF_Al         | 158315.3333 | 274210.201  | 173.2050808 |
| UIJ67954.1 | cold_shock-like_protein_CspB_[Bacillus_cereus]      | CPTF_Cd         | 467841.3333 | 568111.0275 | 121.4324146 |
| UIJ67954.1 | cold_shock-like_protein_CspB_[Bacillus_cereus]      | CPTF_Co         | 885375.6667 | 160199.5618 | 18.09396484 |
| UIJ67954.1 | cold_shock-like_protein_CspB_[Bacillus_cereus]      | CPTF_Cu         | 204896.3333 | 354890.8596 | 173.2050808 |
| UIJ67954.1 | cold_shock-like_protein_CspB_[Bacillus_cereus]      | CPTF_Fe         | 458192.3333 | 410465.7791 | 89.5837292  |
| UIJ67954.1 | cold_shock-like_protein_CspB_[Bacillus_cereus]      | CPTF_Mn         | 151404      | 262239.4205 | 173.2050808 |
| UIJ67954.1 | cold_shock-like_protein_CspB_[Bacillus_cereus]      | CPTF_Ni         | 287691      | 498295.4289 | 173.2050808 |
| UIJ67954.1 | cold_shock-like_protein_CspB_[Bacillus_cereus]      | CPTF_U          | 197306.6667 | 191628.8472 | 97.12233777 |
| UIJ67954.1 | cold_shock-like_protein_CspB_[Bacillus_cereus]      | CPTF_metals_mix | 843605      | 23509.4853  | 2.786788283 |
| UIJ67954.1 | cold_shock-like_protein_CspB_[Bacillus_cereus]      | CPTF_zcontrol   | 0           | 0           | 0           |

|            |                                                           |                 |             |             |             |
|------------|-----------------------------------------------------------|-----------------|-------------|-------------|-------------|
| UIJ67967.1 | oxygen-insensitive_NADPH_nitroreductase_[Bacillus_cereus] | CPTF_Al         | 68444.3     | 36440.6044  | 53.24125515 |
| UIJ67967.1 | oxygen-insensitive_NADPH_nitroreductase_[Bacillus_cereus] | CPTF_Cd         | 68216.6     | 60436.2513  | 88.59464016 |
| UIJ67967.1 | oxygen-insensitive_NADPH_nitroreductase_[Bacillus_cereus] | CPTF_Co         | 34919.36667 | 30577.86536 | 87.56706743 |
| UIJ67967.1 | oxygen-insensitive_NADPH_nitroreductase_[Bacillus_cereus] | CPTF_Cu         | 77140.93333 | 28271.44383 | 36.64908189 |
| UIJ67967.1 | oxygen-insensitive_NADPH_nitroreductase_[Bacillus_cereus] | CPTF_Fe         | 54570.73333 | 55350.83139 | 101.4295173 |
| UIJ67967.1 | oxygen-insensitive_NADPH_nitroreductase_[Bacillus_cereus] | CPTF_Mn         | 33842.33333 | 58616.64078 | 173.2050808 |
| UIJ67967.1 | oxygen-insensitive_NADPH_nitroreductase_[Bacillus_cereus] | CPTF_Ni         | 62573.26667 | 22573.31258 | 36.0750106  |
| UIJ67967.1 | oxygen-insensitive_NADPH_nitroreductase_[Bacillus_cereus] | CPTF_U          | 29606.06667 | 51279.21168 | 173.2050808 |
| UIJ67967.1 | oxygen-insensitive_NADPH_nitroreductase_[Bacillus_cereus] | CPTF_metals_mix | 146202.0333 | 40620.44931 | 27.78377864 |
| UIJ67967.1 | oxygen-insensitive_NADPH_nitroreductase_[Bacillus_cereus] | CPTF_zcontrol   | 46280.46667 | 48178.03752 | 104.100155  |
| UIJ67975.1 | response_regulator_[Bacillus_cereus]                      | CPTF_Al         | 37891.2     | 35661.99984 | 94.11683936 |
| UIJ67975.1 | response_regulator_[Bacillus_cereus]                      | CPTF_Cd         | 0           | 0           | 0           |
| UIJ67975.1 | response_regulator_[Bacillus_cereus]                      | CPTF_Co         | 0           | 0           | 0           |
| UIJ67975.1 | response_regulator_[Bacillus_cereus]                      | CPTF_Cu         | 21452.3     | 37156.47354 | 173.2050808 |
| UIJ67975.1 | response_regulator_[Bacillus_cereus]                      | CPTF_Fe         | 20279.7     | 35125.47076 | 173.2050808 |
| UIJ67975.1 | response_regulator_[Bacillus_cereus]                      | CPTF_Mn         | 28928.76667 | 50106.09367 | 173.2050808 |
| UIJ67975.1 | response_regulator_[Bacillus_cereus]                      | CPTF_Ni         | 18161.96667 | 31457.44903 | 173.2050808 |
| UIJ67975.1 | response_regulator_[Bacillus_cereus]                      | CPTF_U          | 25937.43333 | 44924.95235 | 173.2050808 |
| UIJ67975.1 | response_regulator_[Bacillus_cereus]                      | CPTF_metals_mix | 169938.2333 | 137789.4806 | 81.08209549 |
| UIJ67975.1 | response_regulator_[Bacillus_cereus]                      | CPTF_zcontrol   | 0           | 0           | 0           |
| UIJ67978.1 | transglycosylase_[Bacillus_cereus]                        | CPTF_Al         | 0           | 0           | 0           |
| UIJ67978.1 | transglycosylase_[Bacillus_cereus]                        | CPTF_Cd         | 0           | 0           | 0           |
| UIJ67978.1 | transglycosylase_[Bacillus_cereus]                        | CPTF_Co         | 0           | 0           | 0           |
| UIJ67978.1 | transglycosylase_[Bacillus_cereus]                        | CPTF_Cu         | 0           | 0           | 0           |
| UIJ67978.1 | transglycosylase_[Bacillus_cereus]                        | CPTF_Fe         | 0           | 0           | 0           |
| UIJ67978.1 | transglycosylase_[Bacillus_cereus]                        | CPTF_Mn         | 280574      | 485968.4233 | 173.2050808 |
| UIJ67978.1 | transglycosylase_[Bacillus_cereus]                        | CPTF_Ni         | 0           | 0           | 0           |
| UIJ67978.1 | transglycosylase_[Bacillus_cereus]                        | CPTF_U          | 0           | 0           | 0           |
| UIJ67978.1 | transglycosylase_[Bacillus_cereus]                        | CPTF_metals_mix | 3010000     | 288444.102  | 9.582860533 |
| UIJ67978.1 | transglycosylase_[Bacillus_cereus]                        | CPTF_zcontrol   | 0           | 0           | 0           |
| UIJ68002.1 | chemotaxis_protein_[Bacillus_cereus]                      | CPTF_Al         | 0           | 0           | 0           |
| UIJ68002.1 | chemotaxis_protein_[Bacillus_cereus]                      | CPTF_Cd         | 0           | 0           | 0           |
| UIJ68002.1 | chemotaxis_protein_[Bacillus_cereus]                      | CPTF_Co         | 0           | 0           | 0           |
| UIJ68002.1 | chemotaxis_protein_[Bacillus_cereus]                      | CPTF_Cu         | 0           | 0           | 0           |
| UIJ68002.1 | chemotaxis_protein_[Bacillus_cereus]                      | CPTF_Fe         | 0           | 0           | 0           |
| UIJ68002.1 | chemotaxis_protein_[Bacillus_cereus]                      | CPTF_Mn         | 0           | 0           | 0           |
| UIJ68002.1 | chemotaxis_protein_[Bacillus_cereus]                      | CPTF_Ni         | 0           | 0           | 0           |
| UIJ68002.1 | chemotaxis_protein_[Bacillus_cereus]                      | CPTF_U          | 0           | 0           | 0           |
| UIJ68002.1 | chemotaxis_protein_[Bacillus_cereus]                      | CPTF_metals_mix | 21169.03333 | 36665.84128 | 173.2050808 |
| UIJ68002.1 | chemotaxis_protein_[Bacillus_cereus]                      | CPTF_zcontrol   | 0           | 0           | 0           |
| UIJ68046.1 | hypothetical_protein_LW858_07360_[Bacillus_cereus]        | CPTF_Al         | 3978061     | 1708280.967 | 42.94255334 |
| UIJ68046.1 | hypothetical_protein_LW858_07360_[Bacillus_cereus]        | CPTF_Cd         | 5011027.333 | 273344.4421 | 5.454858333 |
| UIJ68046.1 | hypothetical_protein_LW858_07360_[Bacillus_cereus]        | CPTF_Co         | 3709833     | 1961188.186 | 52.86459487 |
| UIJ68046.1 | hypothetical_protein_LW858_07360_[Bacillus_cereus]        | CPTF_Cu         | 5338423.333 | 483837.8074 | 9.063309092 |
| UIJ68046.1 | hypothetical_protein_LW858_07360_[Bacillus_cereus]        | CPTF_Fe         | 3325812     | 1690535.006 | 50.83074467 |
| UIJ68046.1 | hypothetical_protein_LW858_07360_[Bacillus_cereus]        | CPTF_Mn         | 5261231.333 | 1596963.492 | 30.35341711 |
| UIJ68046.1 | hypothetical_protein_LW858_07360_[Bacillus_cereus]        | CPTF_Ni         | 4853074.667 | 438171.8051 | 9.028746418 |
| UIJ68046.1 | hypothetical_protein_LW858_07360_[Bacillus_cereus]        | CPTF_U          | 5411730.333 | 548675.4318 | 10.13863216 |
| UIJ68046.1 | hypothetical_protein_LW858_07360_[Bacillus_cereus]        | CPTF_metals_mix | 3434139.233 | 166839.0902 | 4.858250609 |
| UIJ68046.1 | hypothetical_protein_LW858_07360_[Bacillus_cereus]        | CPTF_zcontrol   | 5498432.667 | 347233.4183 | 6.315134501 |
| UIJ68071.1 | peptidase_E_[Bacillus_cereus]                             | CPTF_Al         | 0           | 0           | 0           |
| UIJ68071.1 | peptidase_E_[Bacillus_cereus]                             | CPTF_Cd         | 14673.23333 | 25414.78564 | 173.2050808 |
| UIJ68071.1 | peptidase_E_[Bacillus_cereus]                             | CPTF_Co         | 11170.73333 | 19348.27769 | 173.2050808 |
| UIJ68071.1 | peptidase_E_[Bacillus_cereus]                             | CPTF_Cu         | 0           | 0           | 0           |
| UIJ68071.1 | peptidase_E_[Bacillus_cereus]                             | CPTF_Fe         | 0           | 0           | 0           |
| UIJ68071.1 | peptidase_E_[Bacillus_cereus]                             | CPTF_Mn         | 0           | 0           | 0           |
| UIJ68071.1 | peptidase_E_[Bacillus_cereus]                             | CPTF_Ni         | 0           | 0           | 0           |
| UIJ68071.1 | peptidase_E_[Bacillus_cereus]                             | CPTF_U          | 0           | 0           | 0           |
| UIJ68071.1 | peptidase_E_[Bacillus_cereus]                             | CPTF_metals_mix | 60789.43333 | 15809.00325 | 26.00616979 |
| UIJ68071.1 | peptidase_E_[Bacillus_cereus]                             | CPTF_zcontrol   | 0           | 0           | 0           |
| UIJ68081.1 | DUF445_domain-containing_protein_[Bacillus_cereus]        | CPTF_Al         | 21210.56667 | 18374.52267 | 86.62909839 |

|            |                                                                     |                 |              |             |             |
|------------|---------------------------------------------------------------------|-----------------|--------------|-------------|-------------|
| UIJ68081.1 | DUF445_domain-containing_protein_[Bacillus_cereus]                  | CPTF_Cd         | 33233.96667  | 5999.18889  | 18.05137783 |
| UIJ68081.1 | DUF445_domain-containing_protein_[Bacillus_cereus]                  | CPTF_Co         | 12859.46667  | 22273.24962 | 173.2050808 |
| UIJ68081.1 | DUF445_domain-containing_protein_[Bacillus_cereus]                  | CPTF_Cu         | 23803.83333  | 20963.83982 | 88.06917578 |
| UIJ68081.1 | DUF445_domain-containing_protein_[Bacillus_cereus]                  | CPTF_Fe         | 9976.9       | 17280.4977  | 173.2050808 |
| UIJ68081.1 | DUF445_domain-containing_protein_[Bacillus_cereus]                  | CPTF_Mn         | 0            | 0           | 0           |
| UIJ68081.1 | DUF445_domain-containing_protein_[Bacillus_cereus]                  | CPTF_Ni         | 23996.06667  | 20950.96796 | 87.31000898 |
| UIJ68081.1 | DUF445_domain-containing_protein_[Bacillus_cereus]                  | CPTF_U          | 11627.16667  | 20138.84341 | 173.2050808 |
| UIJ68081.1 | DUF445_domain-containing_protein_[Bacillus_cereus]                  | CPTF_metals_mix | 37109.36667  | 19268.59655 | 51.92380867 |
| UIJ68081.1 | DUF445_domain-containing_protein_[Bacillus_cereus]                  | CPTF_zcontrol   | 0            | 0           | 0           |
| UIJ68095.1 | oxaloacetate-decarboxylating_malate_dehydrogenase_[Bacillus_cereus] | CPTF_Al         | 0            | 0           | 0           |
| UIJ68095.1 | oxaloacetate-decarboxylating_malate_dehydrogenase_[Bacillus_cereus] | CPTF_Cd         | 0            | 0           | 0           |
| UIJ68095.1 | oxaloacetate-decarboxylating_malate_dehydrogenase_[Bacillus_cereus] | CPTF_Co         | 27109.93333  | 46955.78192 | 173.2050808 |
| UIJ68095.1 | oxaloacetate-decarboxylating_malate_dehydrogenase_[Bacillus_cereus] | CPTF_Cu         | 18715.7      | 32416.5433  | 173.2050808 |
| UIJ68095.1 | oxaloacetate-decarboxylating_malate_dehydrogenase_[Bacillus_cereus] | CPTF_Fe         | 0            | 0           | 0           |
| UIJ68095.1 | oxaloacetate-decarboxylating_malate_dehydrogenase_[Bacillus_cereus] | CPTF_Mn         | 0            | 0           | 0           |
| UIJ68095.1 | oxaloacetate-decarboxylating_malate_dehydrogenase_[Bacillus_cereus] | CPTF_Ni         | 0            | 0           | 0           |
| UIJ68095.1 | oxaloacetate-decarboxylating_malate_dehydrogenase_[Bacillus_cereus] | CPTF_U          | 0            | 0           | 0           |
| UIJ68095.1 | oxaloacetate-decarboxylating_malate_dehydrogenase_[Bacillus_cereus] | CPTF_metals_mix | 97029.43333  | 46978.36429 | 48.41661203 |
| UIJ68095.1 | oxaloacetate-decarboxylating_malate_dehydrogenase_[Bacillus_cereus] | CPTF_zcontrol   | 0            | 0           | 0           |
| UIJ68100.1 | aspartate--ammonia_ligase_[Bacillus_cereus]                         | CPTF_Al         | 6833914.967  | 537147.512  | 7.860026274 |
| UIJ68100.1 | aspartate--ammonia_ligase_[Bacillus_cereus]                         | CPTF_Cd         | 7175124.3    | 173872.3408 | 2.423265905 |
| UIJ68100.1 | aspartate--ammonia_ligase_[Bacillus_cereus]                         | CPTF_Co         | 6813373.867  | 119426.8551 | 1.752829912 |
| UIJ68100.1 | aspartate--ammonia_ligase_[Bacillus_cereus]                         | CPTF_Cu         | 7399815.367  | 824611.7485 | 11.14368005 |
| UIJ68100.1 | aspartate--ammonia_ligase_[Bacillus_cereus]                         | CPTF_Fe         | 6277530.367  | 474090.5945 | 7.552183212 |
| UIJ68100.1 | aspartate--ammonia_ligase_[Bacillus_cereus]                         | CPTF_Mn         | 6532603.8    | 471263.3907 | 7.214020705 |
| UIJ68100.1 | aspartate--ammonia_ligase_[Bacillus_cereus]                         | CPTF_Ni         | 5657835.367  | 322053.1059 | 5.692161137 |
| UIJ68100.1 | aspartate--ammonia_ligase_[Bacillus_cereus]                         | CPTF_U          | 5459837.833  | 1964690.229 | 35.9844063  |
| UIJ68100.1 | aspartate--ammonia_ligase_[Bacillus_cereus]                         | CPTF_metals_mix | 8704109.533  | 579734.3497 | 6.660467076 |
| UIJ68100.1 | aspartate--ammonia_ligase_[Bacillus_cereus]                         | CPTF_zcontrol   | 6557164.667  | 468660.8734 | 7.147309809 |
| UIJ68101.1 | VOC_family_protein_[Bacillus_cereus]                                | CPTF_Al         | 16144.1      | 18485.36113 | 114.502271  |
| UIJ68101.1 | VOC_family_protein_[Bacillus_cereus]                                | CPTF_Cd         | 17211        | 15448.53508 | 89.75966    |
| UIJ68101.1 | VOC_family_protein_[Bacillus_cereus]                                | CPTF_Co         | 42831.2      | 37362.82991 | 87.23274135 |
| UIJ68101.1 | VOC_family_protein_[Bacillus_cereus]                                | CPTF_Cu         | 69765.93333  | 17797.43447 | 25.51020766 |
| UIJ68101.1 | VOC_family_protein_[Bacillus_cereus]                                | CPTF_Fe         | 33014.86667  | 13009.81712 | 39.40593566 |
| UIJ68101.1 | VOC_family_protein_[Bacillus_cereus]                                | CPTF_Mn         | 0            | 0           | 0           |
| UIJ68101.1 | VOC_family_protein_[Bacillus_cereus]                                | CPTF_Ni         | 44934.7      | 8996.917963 | 20.02220547 |
| UIJ68101.1 | VOC_family_protein_[Bacillus_cereus]                                | CPTF_U          | 0            | 0           | 0           |
| UIJ68101.1 | VOC_family_protein_[Bacillus_cereus]                                | CPTF_metals_mix | 55604.73333  | 9813.214132 | 17.64816328 |
| UIJ68101.1 | VOC_family_protein_[Bacillus_cereus]                                | CPTF_zcontrol   | 27740.1      | 25287.92811 | 91.16019089 |
| UIJ68102.1 | aspartate_kinase_[Bacillus_cereus]                                  | CPTF_Al         | 325260       | 100441.3715 | 30.88033312 |
| UIJ68102.1 | aspartate_kinase_[Bacillus_cereus]                                  | CPTF_Cd         | 261245.6667  | 238957.7671 | 91.46860507 |
| UIJ68102.1 | aspartate_kinase_[Bacillus_cereus]                                  | CPTF_Co         | 442677       | 37713.07354 | 8.519320756 |
| UIJ68102.1 | aspartate_kinase_[Bacillus_cereus]                                  | CPTF_Cu         | 461353.3333  | 64442.31193 | 13.96810368 |
| UIJ68102.1 | aspartate_kinase_[Bacillus_cereus]                                  | CPTF_Fe         | 341222       | 298772.0577 | 87.5594357  |
| UIJ68102.1 | aspartate_kinase_[Bacillus_cereus]                                  | CPTF_Mn         | 421552       | 77744.17687 | 18.44236936 |
| UIJ68102.1 | aspartate_kinase_[Bacillus_cereus]                                  | CPTF_Ni         | 379892.3333  | 129104.7248 | 33.98455654 |
| UIJ68102.1 | aspartate_kinase_[Bacillus_cereus]                                  | CPTF_U          | 403857.3333  | 118453.5406 | 29.33054097 |
| UIJ68102.1 | aspartate_kinase_[Bacillus_cereus]                                  | CPTF_metals_mix | 259174.6667  | 229093.8069 | 88.39359564 |
| UIJ68102.1 | aspartate_kinase_[Bacillus_cereus]                                  | CPTF_zcontrol   | 310902.3333  | 269336.3515 | 86.63053396 |
| UIJ68109.1 | UDP-galactose-lipid_carrier_transferase_[Bacillus_cereus]           | CPTF_Al         | 487946.3667  | 51140.10702 | 10.480682   |
| UIJ68109.1 | UDP-galactose-lipid_carrier_transferase_[Bacillus_cereus]           | CPTF_Cd         | 364832.2     | 214944.1924 | 58.91590502 |
| UIJ68109.1 | UDP-galactose-lipid_carrier_transferase_[Bacillus_cereus]           | CPTF_Co         | 344360.0333  | 215398.3055 | 62.55032079 |
| UIJ68109.1 | UDP-galactose-lipid_carrier_transferase_[Bacillus_cereus]           | CPTF_Cu         | 469827.5667  | 203133.11   | 43.23567292 |
| UIJ68109.1 | UDP-galactose-lipid_carrier_transferase_[Bacillus_cereus]           | CPTF_Fe         | 4092021.9667 | 239111.5704 | 58.4593469  |
| UIJ68109.1 | UDP-galactose-lipid_carrier_transferase_[Bacillus_cereus]           | CPTF_Mn         | 246600.5     | 285913.1695 | 115.941845  |
| UIJ68109.1 | UDP-galactose-lipid_carrier_transferase_[Bacillus_cereus]           | CPTF_Ni         | 220516.3     | 51984.74559 | 23.57410567 |
| UIJ68109.1 | UDP-galactose-lipid_carrier_transferase_[Bacillus_cereus]           | CPTF_U          | 93361.96667  | 56447.49396 | 60.46090927 |
| UIJ68109.1 | UDP-galactose-lipid_carrier_transferase_[Bacillus_cereus]           | CPTF_metals_mix | 621081.9333  | 67861.78714 | 10.92638241 |
| UIJ68109.1 | UDP-galactose-lipid_carrier_transferase_[Bacillus_cereus]           | CPTF_zcontrol   | 333936.1667  | 110306.3908 | 33.03217856 |
| UIJ68114.1 | GTPase_HflX_[Bacillus_cereus]                                       | CPTF_Al         | 0            | 0           | 0           |
| UIJ68114.1 | GTPase_HflX_[Bacillus_cereus]                                       | CPTF_Cd         | 0            | 0           | 0           |

|            |                                                       |                 |             |             |             |
|------------|-------------------------------------------------------|-----------------|-------------|-------------|-------------|
| UIJ68114.1 | GTPase_HfIX [Bacillus_cereus]                         | CPTF_Co         | 5139.033333 | 8901.066835 | 173.2050808 |
| UIJ68114.1 | GTPase_HfIX [Bacillus_cereus]                         | CPTF_Cu         | 18191.5     | 22362.2268  | 122.9267889 |
| UIJ68114.1 | GTPase_HfIX [Bacillus_cereus]                         | CPTF_Fe         | 0           | 0           | 0           |
| UIJ68114.1 | GTPase_HfIX [Bacillus_cereus]                         | CPTF_Mn         | 0           | 0           | 0           |
| UIJ68114.1 | GTPase_HfIX [Bacillus_cereus]                         | CPTF_Ni         | 2197.073333 | 3805.442641 | 173.2050808 |
| UIJ68114.1 | GTPase_HfIX [Bacillus_cereus]                         | CPTF_U          | 0           | 0           | 0           |
| UIJ68114.1 | GTPase_HfIX [Bacillus_cereus]                         | CPTF_metals_mix | 88355.8     | 77146.59465 | 87.31356022 |
| UIJ68114.1 | GTPase_HfIX [Bacillus_cereus]                         | CPTF_zcontrol   | 0           | 0           | 0           |
| UIJ68116.1 | cysteine_synthase_A [Bacillus_cereus]                 | CPTF_Al         | 617280.6667 | 103986.8819 | 16.84596449 |
| UIJ68116.1 | cysteine_synthase_A [Bacillus_cereus]                 | CPTF_Cd         | 794352.5333 | 186277.8367 | 23.45027288 |
| UIJ68116.1 | cysteine_synthase_A [Bacillus_cereus]                 | CPTF_Co         | 457664.4    | 103898.5425 | 22.70190613 |
| UIJ68116.1 | cysteine_synthase_A [Bacillus_cereus]                 | CPTF_Cu         | 419172.6667 | 88281.33099 | 21.06085106 |
| UIJ68116.1 | cysteine_synthase_A [Bacillus_cereus]                 | CPTF_Fe         | 450714.6667 | 113826.8382 | 25.25474465 |
| UIJ68116.1 | cysteine_synthase_A [Bacillus_cereus]                 | CPTF_Mn         | 508034.6667 | 147541.2363 | 29.04156862 |
| UIJ68116.1 | cysteine_synthase_A [Bacillus_cereus]                 | CPTF_Ni         | 446565.8    | 198393.7453 | 44.42654258 |
| UIJ68116.1 | cysteine_synthase_A [Bacillus_cereus]                 | CPTF_U          | 381799      | 139755.1    | 36.60436513 |
| UIJ68116.1 | cysteine_synthase_A [Bacillus_cereus]                 | CPTF_metals_mix | 997976.1333 | 258947.0891 | 25.94722262 |
| UIJ68116.1 | cysteine_synthase_A [Bacillus_cereus]                 | CPTF_zcontrol   | 436450      | 166665.143  | 38.18653751 |
| UIJ68153.1 | rhodanese-related_sulfurtransferase [Bacillus_cereus] | CPTF_Al         | 4373.533333 | 7575.181942 | 173.2050808 |
| UIJ68153.1 | rhodanese-related_sulfurtransferase [Bacillus_cereus] | CPTF_Cd         | 0           | 0           | 0           |
| UIJ68153.1 | rhodanese-related_sulfurtransferase [Bacillus_cereus] | CPTF_Co         | 0           | 0           | 0           |
| UIJ68153.1 | rhodanese-related_sulfurtransferase [Bacillus_cereus] | CPTF_Cu         | 0           | 0           | 0           |
| UIJ68153.1 | rhodanese-related_sulfurtransferase [Bacillus_cereus] | CPTF_Fe         | 0           | 0           | 0           |
| UIJ68153.1 | rhodanese-related_sulfurtransferase [Bacillus_cereus] | CPTF_Mn         | 0           | 0           | 0           |
| UIJ68153.1 | rhodanese-related_sulfurtransferase [Bacillus_cereus] | CPTF_Ni         | 0           | 0           | 0           |
| UIJ68153.1 | rhodanese-related_sulfurtransferase [Bacillus_cereus] | CPTF_U          | 0           | 0           | 0           |
| UIJ68153.1 | rhodanese-related_sulfurtransferase [Bacillus_cereus] | CPTF_metals_mix | 8228.933333 | 14252.93063 | 173.2050808 |
| UIJ68153.1 | rhodanese-related_sulfurtransferase [Bacillus_cereus] | CPTF_zcontrol   | 0           | 0           | 0           |
| UIJ68155.1 | 2-dehydropantoate_2-reductase [Bacillus_cereus]       | CPTF_Al         | 0           | 0           | 0           |
| UIJ68155.1 | 2-dehydropantoate_2-reductase [Bacillus_cereus]       | CPTF_Cd         | 84649       | 146616.3688 | 173.2050808 |
| UIJ68155.1 | 2-dehydropantoate_2-reductase [Bacillus_cereus]       | CPTF_Co         | 27762.63333 | 48086.29149 | 173.2050808 |
| UIJ68155.1 | 2-dehydropantoate_2-reductase [Bacillus_cereus]       | CPTF_Cu         | 54313.16667 | 94073.16419 | 173.2050808 |
| UIJ68155.1 | 2-dehydropantoate_2-reductase [Bacillus_cereus]       | CPTF_Fe         | 18616.9     | 32245.41668 | 173.2050808 |
| UIJ68155.1 | 2-dehydropantoate_2-reductase [Bacillus_cereus]       | CPTF_Mn         | 60861.86667 | 56134.53642 | 92.23268936 |
| UIJ68155.1 | 2-dehydropantoate_2-reductase [Bacillus_cereus]       | CPTF_Ni         | 0           | 0           | 0           |
| UIJ68155.1 | 2-dehydropantoate_2-reductase [Bacillus_cereus]       | CPTF_U          | 0           | 0           | 0           |
| UIJ68155.1 | 2-dehydropantoate_2-reductase [Bacillus_cereus]       | CPTF_metals_mix | 99454.46667 | 71536.32097 | 71.92871609 |
| UIJ68155.1 | 2-dehydropantoate_2-reductase [Bacillus_cereus]       | CPTF_zcontrol   | 17299.4     | 29963.43974 | 173.2050808 |
| UIJ68164.1 | deoxyribose-phosphate_aldolase [Bacillus_cereus]      | CPTF_Al         | 420086      | 143230.7076 | 34.09556796 |
| UIJ68164.1 | deoxyribose-phosphate_aldolase [Bacillus_cereus]      | CPTF_Cd         | 541039.7667 | 270665.9432 | 50.02699614 |
| UIJ68164.1 | deoxyribose-phosphate_aldolase [Bacillus_cereus]      | CPTF_Co         | 443855.8    | 39573.88065 | 8.915931851 |
| UIJ68164.1 | deoxyribose-phosphate_aldolase [Bacillus_cereus]      | CPTF_Cu         | 284235.7333 | 62314.75938 | 21.92361905 |
| UIJ68164.1 | deoxyribose-phosphate_aldolase [Bacillus_cereus]      | CPTF_Fe         | 446141.7667 | 160445.2574 | 35.96284171 |
| UIJ68164.1 | deoxyribose-phosphate_aldolase [Bacillus_cereus]      | CPTF_Mn         | 292574.2    | 220619.8653 | 75.40646624 |
| UIJ68164.1 | deoxyribose-phosphate_aldolase [Bacillus_cereus]      | CPTF_Ni         | 86769.4     | 54884.48423 | 63.25327158 |
| UIJ68164.1 | deoxyribose-phosphate_aldolase [Bacillus_cereus]      | CPTF_U          | 252908.4333 | 33145.32955 | 13.10566402 |
| UIJ68164.1 | deoxyribose-phosphate_aldolase [Bacillus_cereus]      | CPTF_metals_mix | 401528.4667 | 226138.961  | 56.31953391 |
| UIJ68164.1 | deoxyribose-phosphate_aldolase [Bacillus_cereus]      | CPTF_zcontrol   | 320522.3333 | 204738.8589 | 63.87662812 |
| UIJ68168.1 | aminopeptidase_P_family_protein [Bacillus_cereus]     | CPTF_Al         | 2101756.6   | 329928.5642 | 15.69775321 |
| UIJ68168.1 | aminopeptidase_P_family_protein [Bacillus_cereus]     | CPTF_Cd         | 2094333.367 | 270524.5528 | 12.91697669 |
| UIJ68168.1 | aminopeptidase_P_family_protein [Bacillus_cereus]     | CPTF_Co         | 1988400.933 | 156171.7635 | 7.854138515 |
| UIJ68168.1 | aminopeptidase_P_family_protein [Bacillus_cereus]     | CPTF_Cu         | 2396635.6   | 133427.3485 | 5.56727725  |
| UIJ68168.1 | aminopeptidase_P_family_protein [Bacillus_cereus]     | CPTF_Fe         | 1814600.233 | 323939.5433 | 17.85184072 |
| UIJ68168.1 | aminopeptidase_P_family_protein [Bacillus_cereus]     | CPTF_Mn         | 1901694.667 | 117099.1781 | 6.157622467 |
| UIJ68168.1 | aminopeptidase_P_family_protein [Bacillus_cereus]     | CPTF_Ni         | 1821610.967 | 164753.721  | 9.044396639 |
| UIJ68168.1 | aminopeptidase_P_family_protein [Bacillus_cereus]     | CPTF_U          | 2060564.1   | 580510.5143 | 28.17240747 |
| UIJ68168.1 | aminopeptidase_P_family_protein [Bacillus_cereus]     | CPTF_metals_mix | 3460778.367 | 250816.2646 | 7.247394604 |
| UIJ68168.1 | aminopeptidase_P_family_protein [Bacillus_cereus]     | CPTF_zcontrol   | 2080115.233 | 134255.9221 | 6.454254069 |
| UIJ68170.1 | multicopper_oxidase_family_protein [Bacillus_cereus]  | CPTF_Al         | 12527863.37 | 1043822.739 | 8.332009284 |
| UIJ68170.1 | multicopper_oxidase_family_protein [Bacillus_cereus]  | CPTF_Cd         | 11461488.23 | 1765964.469 | 15.40781121 |
| UIJ68170.1 | multicopper_oxidase_family_protein [Bacillus_cereus]  | CPTF_Co         | 11563642.83 | 355390.0495 | 3.073339903 |

|            |                                                              |                 |             |             |             |
|------------|--------------------------------------------------------------|-----------------|-------------|-------------|-------------|
| UIJ68170.1 | multicopper_oxidase_family_protein_[Bacillus_cereus]         | CPTF_Cu         | 17491493.67 | 1157730.575 | 6.618820535 |
| UIJ68170.1 | multicopper_oxidase_family_protein_[Bacillus_cereus]         | CPTF_Fe         | 12244756.57 | 2385773.208 | 19.48403952 |
| UIJ68170.1 | multicopper_oxidase_family_protein_[Bacillus_cereus]         | CPTF_Mn         | 14148341.37 | 2446708.664 | 17.29325439 |
| UIJ68170.1 | multicopper_oxidase_family_protein_[Bacillus_cereus]         | CPTF_Ni         | 10769782.33 | 611432.3862 | 5.677295671 |
| UIJ68170.1 | multicopper_oxidase_family_protein_[Bacillus_cereus]         | CPTF_U          | 10337357.47 | 1210143.852 | 11.70651064 |
| UIJ68170.1 | multicopper_oxidase_family_protein_[Bacillus_cereus]         | CPTF_metals_mix | 22250147.67 | 532737.2392 | 2.39430878  |
| UIJ68170.1 | multicopper_oxidase_family_protein_[Bacillus_cereus]         | CPTF_zcontrol   | 12359070.63 | 1284396.394 | 10.392338   |
| UIJ68172.1 | TetR/AcrR_family_transcriptional_regulator_[Bacillus_cereus] | CPTF_Al         | 0           | 0           | 0           |
| UIJ68172.1 | TetR/AcrR_family_transcriptional_regulator_[Bacillus_cereus] | CPTF_Cd         | 0           | 0           | 0           |
| UIJ68172.1 | TetR/AcrR_family_transcriptional_regulator_[Bacillus_cereus] | CPTF_Co         | 31092.13333 | 27317.1773  | 87.85880661 |
| UIJ68172.1 | TetR/AcrR_family_transcriptional_regulator_[Bacillus_cereus] | CPTF_Cu         | 62737.33333 | 39152.52264 | 62.40705583 |
| UIJ68172.1 | TetR/AcrR_family_transcriptional_regulator_[Bacillus_cereus] | CPTF_Fe         | 25593.4     | 44329.06914 | 173.2050808 |
| UIJ68172.1 | TetR/AcrR_family_transcriptional_regulator_[Bacillus_cereus] | CPTF_Mn         | 25586.53333 | 44317.17572 | 173.2050808 |
| UIJ68172.1 | TetR/AcrR_family_transcriptional_regulator_[Bacillus_cereus] | CPTF_Ni         | 0           | 0           | 0           |
| UIJ68172.1 | TetR/AcrR_family_transcriptional_regulator_[Bacillus_cereus] | CPTF_U          | 0           | 0           | 0           |
| UIJ68172.1 | TetR/AcrR_family_transcriptional_regulator_[Bacillus_cereus] | CPTF_metals_mix | 27908.43333 | 48338.82449 | 173.2050808 |
| UIJ68172.1 | TetR/AcrR_family_transcriptional_regulator_[Bacillus_cereus] | CPTF_zcontrol   | 0           | 0           | 0           |
| UIJ68200.1 | DUF4352_domain-containing_protein_[Bacillus_cereus]          | CPTF_Al         | 552541.6333 | 177580.7325 | 32.13888725 |
| UIJ68200.1 | DUF4352_domain-containing_protein_[Bacillus_cereus]          | CPTF_Cd         | 922893.6667 | 50679.64469 | 5.491385034 |
| UIJ68200.1 | DUF4352_domain-containing_protein_[Bacillus_cereus]          | CPTF_Co         | 492210      | 207183.8956 | 42.09258154 |
| UIJ68200.1 | DUF4352_domain-containing_protein_[Bacillus_cereus]          | CPTF_Cu         | 469900.6333 | 23766.46426 | 5.057763828 |
| UIJ68200.1 | DUF4352_domain-containing_protein_[Bacillus_cereus]          | CPTF_Fe         | 649625.0333 | 160552.1913 | 24.71459427 |
| UIJ68200.1 | DUF4352_domain-containing_protein_[Bacillus_cereus]          | CPTF_Mn         | 587261.6667 | 269339.1058 | 45.86355982 |
| UIJ68200.1 | DUF4352_domain-containing_protein_[Bacillus_cereus]          | CPTF_Ni         | 0           | 0           | 0           |
| UIJ68200.1 | DUF4352_domain-containing_protein_[Bacillus_cereus]          | CPTF_U          | 348139.4667 | 98114.09503 | 28.18241091 |
| UIJ68200.1 | DUF4352_domain-containing_protein_[Bacillus_cereus]          | CPTF_metals_mix | 826008      | 34744.97004 | 4.206372098 |
| UIJ68200.1 | DUF4352_domain-containing_protein_[Bacillus_cereus]          | CPTF_zcontrol   | 452731.6667 | 170246.1385 | 37.60420378 |
| UIJ68201.1 | MarR_family_transcriptional_regulator_[Bacillus_cereus]      | CPTF_Al         | 46163.1     | 43228.61923 | 93.64323287 |
| UIJ68201.1 | MarR_family_transcriptional_regulator_[Bacillus_cereus]      | CPTF_Cd         | 82758.83333 | 44951.37704 | 54.31610769 |
| UIJ68201.1 | MarR_family_transcriptional_regulator_[Bacillus_cereus]      | CPTF_Co         | 30931.13333 | 28873.32891 | 93.34714187 |
| UIJ68201.1 | MarR_family_transcriptional_regulator_[Bacillus_cereus]      | CPTF_Cu         | 50000.16667 | 19224.64462 | 38.44916109 |
| UIJ68201.1 | MarR_family_transcriptional_regulator_[Bacillus_cereus]      | CPTF_Fe         | 35931.9     | 31455.57869 | 87.54220815 |
| UIJ68201.1 | MarR_family_transcriptional_regulator_[Bacillus_cereus]      | CPTF_Mn         | 25626.83333 | 44386.97737 | 173.2050808 |
| UIJ68201.1 | MarR_family_transcriptional_regulator_[Bacillus_cereus]      | CPTF_Ni         | 0           | 0           | 0           |
| UIJ68201.1 | MarR_family_transcriptional_regulator_[Bacillus_cereus]      | CPTF_U          | 0           | 0           | 0           |
| UIJ68201.1 | MarR_family_transcriptional_regulator_[Bacillus_cereus]      | CPTF_metals_mix | 63490.4     | 8465.924063 | 13.33417975 |
| UIJ68201.1 | MarR_family_transcriptional_regulator_[Bacillus_cereus]      | CPTF_zcontrol   | 0           | 0           | 0           |
| UIJ68212.1 | DUF6376_family_protein_[Bacillus_cereus]                     | CPTF_Al         | 157018.6667 | 19066.27091 | 12.14267788 |
| UIJ68212.1 | DUF6376_family_protein_[Bacillus_cereus]                     | CPTF_Cd         | 153627      | 46444.5719  | 30.23203727 |
| UIJ68212.1 | DUF6376_family_protein_[Bacillus_cereus]                     | CPTF_Co         | 124289      | 10065.36005 | 8.098351466 |
| UIJ68212.1 | DUF6376_family_protein_[Bacillus_cereus]                     | CPTF_Cu         | 66365.9     | 61121.90733 | 92.09836276 |
| UIJ68212.1 | DUF6376_family_protein_[Bacillus_cereus]                     | CPTF_Fe         | 167583.3333 | 38809.33105 | 23.15822837 |
| UIJ68212.1 | DUF6376_family_protein_[Bacillus_cereus]                     | CPTF_Mn         | 94394.66667 | 82684.48032 | 87.5944407  |
| UIJ68212.1 | DUF6376_family_protein_[Bacillus_cereus]                     | CPTF_Ni         | 66809.5     | 63107.1167  | 94.45829815 |
| UIJ68212.1 | DUF6376_family_protein_[Bacillus_cereus]                     | CPTF_U          | 53671.33333 | 92961.47624 | 173.2050808 |
| UIJ68212.1 | DUF6376_family_protein_[Bacillus_cereus]                     | CPTF_metals_mix | 0           | 0           | 0           |
| UIJ68212.1 | DUF6376_family_protein_[Bacillus_cereus]                     | CPTF_zcontrol   | 115980      | 5081.235184 | 4.381130526 |
| UIJ68217.1 | nitroreductase_family_protein_[Bacillus_cereus]              | CPTF_Al         | 4397519.733 | 294936.5409 | 6.706883852 |
| UIJ68217.1 | nitroreductase_family_protein_[Bacillus_cereus]              | CPTF_Cd         | 4644996.1   | 335261.6258 | 7.217694452 |
| UIJ68217.1 | nitroreductase_family_protein_[Bacillus_cereus]              | CPTF_Co         | 3391859.833 | 639876.3153 | 18.86505772 |
| UIJ68217.1 | nitroreductase_family_protein_[Bacillus_cereus]              | CPTF_Cu         | 4982125.233 | 351230.2756 | 7.049808248 |
| UIJ68217.1 | nitroreductase_family_protein_[Bacillus_cereus]              | CPTF_Fe         | 3900043.2   | 164652.5061 | 4.221812366 |
| UIJ68217.1 | nitroreductase_family_protein_[Bacillus_cereus]              | CPTF_Mn         | 3874017.967 | 385668.5312 | 9.955259229 |
| UIJ68217.1 | nitroreductase_family_protein_[Bacillus_cereus]              | CPTF_Ni         | 3893374.833 | 204256.5672 | 5.246260018 |
| UIJ68217.1 | nitroreductase_family_protein_[Bacillus_cereus]              | CPTF_U          | 3659364.533 | 423734.1417 | 11.57944604 |
| UIJ68217.1 | nitroreductase_family_protein_[Bacillus_cereus]              | CPTF_metals_mix | 6569502.333 | 266266.9249 | 4.053076038 |
| UIJ68217.1 | nitroreductase_family_protein_[Bacillus_cereus]              | CPTF_zcontrol   | 4410755.533 | 571794.5308 | 12.96364141 |
| UIJ68219.1 | SH3_domain-containing_protein_[Bacillus_cereus]              | CPTF_Al         | 3661930.1   | 276210.6854 | 7.542762363 |
| UIJ68219.1 | SH3_domain-containing_protein_[Bacillus_cereus]              | CPTF_Cd         | 3730510.267 | 105417.7155 | 2.825825636 |
| UIJ68219.1 | SH3_domain-containing_protein_[Bacillus_cereus]              | CPTF_Co         | 3832065.467 | 260897.9182 | 6.808284475 |
| UIJ68219.1 | SH3_domain-containing_protein_[Bacillus_cereus]              | CPTF_Cu         | 6213599.333 | 263075.462  | 4.233865879 |

|            |                                                     |                 |             |             |             |
|------------|-----------------------------------------------------|-----------------|-------------|-------------|-------------|
| UIJ68219.1 | SH3_domain-containing_protein_[Bacillus_cereus]     | CPTF_Fe         | 4031777.033 | 683411.7956 | 16.95063467 |
| UIJ68219.1 | SH3_domain-containing_protein_[Bacillus_cereus]     | CPTF_Mn         | 3638871.567 | 701509.3318 | 19.27821081 |
| UIJ68219.1 | SH3_domain-containing_protein_[Bacillus_cereus]     | CPTF_Ni         | 3682922.933 | 423208.6084 | 11.49110682 |
| UIJ68219.1 | SH3_domain-containing_protein_[Bacillus_cereus]     | CPTF_U          | 2854136.667 | 303931.8764 | 10.64882001 |
| UIJ68219.1 | SH3_domain-containing_protein_[Bacillus_cereus]     | CPTF_metals_mix | 6489752.7   | 159222.6944 | 2.453447793 |
| UIJ68219.1 | SH3_domain-containing_protein_[Bacillus_cereus]     | CPTF_zcontrol   | 3715100.833 | 442332.2434 | 11.90633211 |
| UIJ68225.1 | 3-ketoacyl-ACP_reductase_[Bacillus_cereus]          | CPTF_Al         | 808923.6667 | 217111.3286 | 26.83953228 |
| UIJ68225.1 | 3-ketoacyl-ACP_reductase_[Bacillus_cereus]          | CPTF_Cd         | 1041271.333 | 113424.881  | 10.89292266 |
| UIJ68225.1 | 3-ketoacyl-ACP_reductase_[Bacillus_cereus]          | CPTF_Co         | 754849      | 154616.8022 | 20.48314327 |
| UIJ68225.1 | 3-ketoacyl-ACP_reductase_[Bacillus_cereus]          | CPTF_Cu         | 773830.6667 | 134062.9426 | 17.32458384 |
| UIJ68225.1 | 3-ketoacyl-ACP_reductase_[Bacillus_cereus]          | CPTF_Fe         | 739624.3333 | 49831.27265 | 6.737376045 |
| UIJ68225.1 | 3-ketoacyl-ACP_reductase_[Bacillus_cereus]          | CPTF_Mn         | 780715.3333 | 257750.216  | 33.01462198 |
| UIJ68225.1 | 3-ketoacyl-ACP_reductase_[Bacillus_cereus]          | CPTF_Ni         | 514785.3333 | 445864.1367 | 86.61166273 |
| UIJ68225.1 | 3-ketoacyl-ACP_reductase_[Bacillus_cereus]          | CPTF_U          | 599855.7667 | 128169.1384 | 21.36665938 |
| UIJ68225.1 | 3-ketoacyl-ACP_reductase_[Bacillus_cereus]          | CPTF_metals_mix | 1163678     | 118739.701  | 10.20382795 |
| UIJ68225.1 | 3-ketoacyl-ACP_reductase_[Bacillus_cereus]          | CPTF_zcontrol   | 610338      | 22207.48261 | 3.638554803 |
| UIJ68228.1 | NUDIX_domain-containing_protein_[Bacillus_cereus]   | CPTF_Al         | 29958.9     | 51890.33694 | 173.2050808 |
| UIJ68228.1 | NUDIX_domain-containing_protein_[Bacillus_cereus]   | CPTF_Cd         | 109840.1333 | 21300.3329  | 19.39212221 |
| UIJ68228.1 | NUDIX_domain-containing_protein_[Bacillus_cereus]   | CPTF_Co         | 16551.56667 | 28668.15441 | 173.2050808 |
| UIJ68228.1 | NUDIX_domain-containing_protein_[Bacillus_cereus]   | CPTF_Cu         | 63220.3     | 48197.23413 | 76.23695891 |
| UIJ68228.1 | NUDIX_domain-containing_protein_[Bacillus_cereus]   | CPTF_Fe         | 103153.8667 | 23663.61911 | 22.94011837 |
| UIJ68228.1 | NUDIX_domain-containing_protein_[Bacillus_cereus]   | CPTF_Mn         | 56391.9     | 52878.31783 | 93.76934956 |
| UIJ68228.1 | NUDIX_domain-containing_protein_[Bacillus_cereus]   | CPTF_Ni         | 115439.3333 | 100010.1459 | 86.63437583 |
| UIJ68228.1 | NUDIX_domain-containing_protein_[Bacillus_cereus]   | CPTF_U          | 144323      | 12186.52465 | 8.443924148 |
| UIJ68228.1 | NUDIX_domain-containing_protein_[Bacillus_cereus]   | CPTF_metals_mix | 17109.16667 | 29633.94594 | 173.2050808 |
| UIJ68228.1 | NUDIX_domain-containing_protein_[Bacillus_cereus]   | CPTF_zcontrol   | 44341.76667 | 51345.09666 | 115.7939805 |
| UIJ68230.1 | homoserine_dehydrogenase_[Bacillus_cereus]          | CPTF_Al         | 636514.3667 | 81457.19635 | 12.79738536 |
| UIJ68230.1 | homoserine_dehydrogenase_[Bacillus_cereus]          | CPTF_Cd         | 605141      | 175206.4787 | 28.95300081 |
| UIJ68230.1 | homoserine_dehydrogenase_[Bacillus_cereus]          | CPTF_Co         | 625329.9667 | 133373.5069 | 21.32855008 |
| UIJ68230.1 | homoserine_dehydrogenase_[Bacillus_cereus]          | CPTF_Cu         | 555220.3333 | 258071.688  | 46.48095044 |
| UIJ68230.1 | homoserine_dehydrogenase_[Bacillus_cereus]          | CPTF_Fe         | 818093.7833 | 96063.57518 | 11.74236709 |
| UIJ68230.1 | homoserine_dehydrogenase_[Bacillus_cereus]          | CPTF_Mn         | 726259.2333 | 408970.1438 | 56.31186841 |
| UIJ68230.1 | homoserine_dehydrogenase_[Bacillus_cereus]          | CPTF_Ni         | 672415.1333 | 300423.8176 | 44.67832485 |
| UIJ68230.1 | homoserine_dehydrogenase_[Bacillus_cereus]          | CPTF_U          | 753280.1667 | 439252.1788 | 58.31192672 |
| UIJ68230.1 | homoserine_dehydrogenase_[Bacillus_cereus]          | CPTF_metals_mix | 108656.0667 | 45521.27609 | 41.89483154 |
| UIJ68230.1 | homoserine_dehydrogenase_[Bacillus_cereus]          | CPTF_zcontrol   | 683932.4    | 162328.6218 | 23.73460034 |
| UIJ68231.1 | threonine_synthase_[Bacillus_cereus]                | CPTF_Al         | 1226328.033 | 409826.144  | 33.41896563 |
| UIJ68231.1 | threonine_synthase_[Bacillus_cereus]                | CPTF_Cd         | 1184002.133 | 359590.2782 | 30.3707458  |
| UIJ68231.1 | threonine_synthase_[Bacillus_cereus]                | CPTF_Co         | 1228439.667 | 564397.143  | 45.94422977 |
| UIJ68231.1 | threonine_synthase_[Bacillus_cereus]                | CPTF_Cu         | 974140.3333 | 668281.3521 | 68.60216431 |
| UIJ68231.1 | threonine_synthase_[Bacillus_cereus]                | CPTF_Fe         | 1286121.6   | 208707.7601 | 16.22768485 |
| UIJ68231.1 | threonine_synthase_[Bacillus_cereus]                | CPTF_Mn         | 1343599.933 | 674179.4004 | 50.17709391 |
| UIJ68231.1 | threonine_synthase_[Bacillus_cereus]                | CPTF_Ni         | 1282494.667 | 722780.323  | 56.35737456 |
| UIJ68231.1 | threonine_synthase_[Bacillus_cereus]                | CPTF_U          | 976069.5    | 324831.8086 | 33.27957779 |
| UIJ68231.1 | threonine_synthase_[Bacillus_cereus]                | CPTF_metals_mix | 77191.26667 | 7992.659843 | 10.35435767 |
| UIJ68231.1 | threonine_synthase_[Bacillus_cereus]                | CPTF_zcontrol   | 1094481.333 | 144096.0656 | 13.16569422 |
| UIJ68239.1 | YkyA_family_protein_[Bacillus_cereus]               | CPTF_Al         | 1753333.333 | 502427.4409 | 28.65555746 |
| UIJ68239.1 | YkyA_family_protein_[Bacillus_cereus]               | CPTF_Cd         | 2480000     | 426731.7659 | 17.20692604 |
| UIJ68239.1 | YkyA_family_protein_[Bacillus_cereus]               | CPTF_Co         | 1221876.667 | 345854.9777 | 28.30522811 |
| UIJ68239.1 | YkyA_family_protein_[Bacillus_cereus]               | CPTF_Cu         | 915975.6667 | 151547.3368 | 16.54490859 |
| UIJ68239.1 | YkyA_family_protein_[Bacillus_cereus]               | CPTF_Fe         | 2050000     | 1054324.428 | 51.43045991 |
| UIJ68239.1 | YkyA_family_protein_[Bacillus_cereus]               | CPTF_Mn         | 1543333.333 | 332014.0559 | 21.5127898  |
| UIJ68239.1 | YkyA_family_protein_[Bacillus_cereus]               | CPTF_Ni         | 343315.3333 | 324692.3742 | 94.57555274 |
| UIJ68239.1 | YkyA_family_protein_[Bacillus_cereus]               | CPTF_U          | 1007452.333 | 505167.1326 | 50.14303068 |
| UIJ68239.1 | YkyA_family_protein_[Bacillus_cereus]               | CPTF_metals_mix | 901895      | 374583.1256 | 41.53289746 |
| UIJ68239.1 | YkyA_family_protein_[Bacillus_cereus]               | CPTF_zcontrol   | 1456666.667 | 256969.5183 | 17.64092803 |
| UIJ68252.1 | DUF1963_domain-containing_protein_[Bacillus_cereus] | CPTF_Al         | 0           | 0           | 0           |
| UIJ68252.1 | DUF1963_domain-containing_protein_[Bacillus_cereus] | CPTF_Cd         | 0           | 0           | 0           |
| UIJ68252.1 | DUF1963_domain-containing_protein_[Bacillus_cereus] | CPTF_Co         | 0           | 0           | 0           |
| UIJ68252.1 | DUF1963_domain-containing_protein_[Bacillus_cereus] | CPTF_Cu         | 0           | 0           | 0           |
| UIJ68252.1 | DUF1963_domain-containing_protein_[Bacillus_cereus] | CPTF_Fe         | 0           | 0           | 0           |

|            |                                                                                |                 |             |             |             |
|------------|--------------------------------------------------------------------------------|-----------------|-------------|-------------|-------------|
| UIJ68252.1 | DUF1963_domain-containing_protein_[Bacillus_cereus]                            | CPTF_Mn         | 0           | 0           | 0           |
| UIJ68252.1 | DUF1963_domain-containing_protein_[Bacillus_cereus]                            | CPTF_Ni         | 0           | 0           | 0           |
| UIJ68252.1 | DUF1963_domain-containing_protein_[Bacillus_cereus]                            | CPTF_U          | 0           | 0           | 0           |
| UIJ68252.1 | DUF1963_domain-containing_protein_[Bacillus_cereus]                            | CPTF_metals_mix | 28915.9     | 50083.80795 | 173.2050808 |
| UIJ68252.1 | DUF1963_domain-containing_protein_[Bacillus_cereus]                            | CPTF_zcontrol   | 0           | 0           | 0           |
| UIJ68256.1 | ammonia-dependent_NAD(+)_synthetase_[Bacillus_cereus]                          | CPTF_Al         | 2057301.133 | 75421.21204 | 3.666026855 |
| UIJ68256.1 | ammonia-dependent_NAD(+)_synthetase_[Bacillus_cereus]                          | CPTF_Cd         | 2026334.3   | 235897.4714 | 11.64158705 |
| UIJ68256.1 | ammonia-dependent_NAD(+)_synthetase_[Bacillus_cereus]                          | CPTF_Co         | 1845303.767 | 74814.13812 | 4.054299323 |
| UIJ68256.1 | ammonia-dependent_NAD(+)_synthetase_[Bacillus_cereus]                          | CPTF_Cu         | 2322407.5   | 189753.4059 | 8.170547412 |
| UIJ68256.1 | ammonia-dependent_NAD(+)_synthetase_[Bacillus_cereus]                          | CPTF_Fe         | 2000752.5   | 355746.9449 | 17.78065727 |
| UIJ68256.1 | ammonia-dependent_NAD(+)_synthetase_[Bacillus_cereus]                          | CPTF_Mn         | 1846637.167 | 177495.2314 | 9.611808674 |
| UIJ68256.1 | ammonia-dependent_NAD(+)_synthetase_[Bacillus_cereus]                          | CPTF_Ni         | 1958163.333 | 360043.3627 | 18.38678912 |
| UIJ68256.1 | ammonia-dependent_NAD(+)_synthetase_[Bacillus_cereus]                          | CPTF_U          | 2153996.667 | 418268.1456 | 19.41823551 |
| UIJ68256.1 | ammonia-dependent_NAD(+)_synthetase_[Bacillus_cereus]                          | CPTF_metals_mix | 2459338.367 | 66224.44695 | 2.692774929 |
| UIJ68256.1 | ammonia-dependent_NAD(+)_synthetase_[Bacillus_cereus]                          | CPTF_zcontrol   | 1674264.1   | 250979.9592 | 14.99046412 |
| UIJ68257.1 | AbrB/MazE/SpoVT_family_DNA-binding_domain-containing_protein_[Bacillus_cereus] | CPTF_Al         | 78363.43333 | 51567.05417 | 65.804996   |
| UIJ68257.1 | AbrB/MazE/SpoVT_family_DNA-binding_domain-containing_protein_[Bacillus_cereus] | CPTF_Cd         | 71369       | 19382.12851 | 27.15762938 |
| UIJ68257.1 | AbrB/MazE/SpoVT_family_DNA-binding_domain-containing_protein_[Bacillus_cereus] | CPTF_Co         | 126071.2    | 51991.44307 | 41.23974633 |
| UIJ68257.1 | AbrB/MazE/SpoVT_family_DNA-binding_domain-containing_protein_[Bacillus_cereus] | CPTF_Cu         | 127641.3333 | 23013.4074  | 18.02974538 |
| UIJ68257.1 | AbrB/MazE/SpoVT_family_DNA-binding_domain-containing_protein_[Bacillus_cereus] | CPTF_Fe         | 61675.13333 | 57327.07116 | 92.9500563  |
| UIJ68257.1 | AbrB/MazE/SpoVT_family_DNA-binding_domain-containing_protein_[Bacillus_cereus] | CPTF_Mn         | 95392.46667 | 43746.08837 | 45.85905983 |
| UIJ68257.1 | AbrB/MazE/SpoVT_family_DNA-binding_domain-containing_protein_[Bacillus_cereus] | CPTF_Ni         | 100130.9    | 29894.84253 | 29.85576134 |
| UIJ68257.1 | AbrB/MazE/SpoVT_family_DNA-binding_domain-containing_protein_[Bacillus_cereus] | CPTF_U          | 35475.16667 | 33593.00255 | 94.69441782 |
| UIJ68257.1 | AbrB/MazE/SpoVT_family_DNA-binding_domain-containing_protein_[Bacillus_cereus] | CPTF_metals_mix | 116243.4333 | 27047.55655 | 23.26802966 |
| UIJ68257.1 | AbrB/MazE/SpoVT_family_DNA-binding_domain-containing_protein_[Bacillus_cereus] | CPTF_zcontrol   | 75026.56667 | 68351.0373  | 91.10244589 |
| UIJ68280.1 | DinB_family_protein_[Bacillus_cereus]                                          | CPTF_Al         | 0           | 0           | 0           |
| UIJ68280.1 | DinB_family_protein_[Bacillus_cereus]                                          | CPTF_Cd         | 18924.5     | 16433.75181 | 86.83849936 |
| UIJ68280.1 | DinB_family_protein_[Bacillus_cereus]                                          | CPTF_Co         | 3596.333333 | 6229.032054 | 173.2050808 |
| UIJ68280.1 | DinB_family_protein_[Bacillus_cereus]                                          | CPTF_Cu         | 18447.8     | 17775.59683 | 96.35618789 |
| UIJ68280.1 | DinB_family_protein_[Bacillus_cereus]                                          | CPTF_Fe         | 20781       | 18189.14325 | 87.52775731 |
| UIJ68280.1 | DinB_family_protein_[Bacillus_cereus]                                          | CPTF_Mn         | 0           | 0           | 0           |
| UIJ68280.1 | DinB_family_protein_[Bacillus_cereus]                                          | CPTF_Ni         | 14319.5     | 24802.10154 | 173.2050808 |
| UIJ68280.1 | DinB_family_protein_[Bacillus_cereus]                                          | CPTF_U          | 7176.833333 | 12430.63997 | 173.2050808 |
| UIJ68280.1 | DinB_family_protein_[Bacillus_cereus]                                          | CPTF_metals_mix | 0           | 0           | 0           |
| UIJ68280.1 | DinB_family_protein_[Bacillus_cereus]                                          | CPTF_zcontrol   | 0           | 0           | 0           |
| UIJ68285.1 | DNA_starvation/stationary_phase_protection_protein_[Bacillus_cereus]           | CPTF_Al         | 3627112.667 | 297124.1412 | 8.191753841 |
| UIJ68285.1 | DNA_starvation/stationary_phase_protection_protein_[Bacillus_cereus]           | CPTF_Cd         | 3675773     | 236241.7248 | 6.426994399 |
| UIJ68285.1 | DNA_starvation/stationary_phase_protection_protein_[Bacillus_cereus]           | CPTF_Co         | 3772344.333 | 437540.1079 | 11.59862593 |
| UIJ68285.1 | DNA_starvation/stationary_phase_protection_protein_[Bacillus_cereus]           | CPTF_Cu         | 3589212.667 | 365829.5384 | 10.19247318 |
| UIJ68285.1 | DNA_starvation/stationary_phase_protection_protein_[Bacillus_cereus]           | CPTF_Fe         | 3426687.333 | 114442.3526 | 3.339737229 |
| UIJ68285.1 | DNA_starvation/stationary_phase_protection_protein_[Bacillus_cereus]           | CPTF_Mn         | 3623745.667 | 1203856.643 | 33.22133376 |
| UIJ68285.1 | DNA_starvation/stationary_phase_protection_protein_[Bacillus_cereus]           | CPTF_Ni         | 2272035.667 | 794579.0385 | 34.97211994 |
| UIJ68285.1 | DNA_starvation/stationary_phase_protection_protein_[Bacillus_cereus]           | CPTF_U          | 2587474.667 | 409765.9471 | 15.83652016 |
| UIJ68285.1 | DNA_starvation/stationary_phase_protection_protein_[Bacillus_cereus]           | CPTF_metals_mix | 5236330.667 | 352745.6066 | 6.736503653 |
| UIJ68285.1 | DNA_starvation/stationary_phase_protection_protein_[Bacillus_cereus]           | CPTF_zcontrol   | 3356289.667 | 391553.6192 | 11.66626418 |
| UIJ68286.1 | DUF3939_domain-containing_protein_[Bacillus_cereus]                            | CPTF_Al         | 112534.5333 | 122036.6657 | 108.443748  |
| UIJ68286.1 | DUF3939_domain-containing_protein_[Bacillus_cereus]                            | CPTF_Cd         | 22584.56667 | 39117.61693 | 173.2050808 |
| UIJ68286.1 | DUF3939_domain-containing_protein_[Bacillus_cereus]                            | CPTF_Co         | 182957.6667 | 65512.53644 | 35.80748357 |
| UIJ68286.1 | DUF3939_domain-containing_protein_[Bacillus_cereus]                            | CPTF_Cu         | 193282.3333 | 71133.68987 | 36.80299624 |
| UIJ68286.1 | DUF3939_domain-containing_protein_[Bacillus_cereus]                            | CPTF_Fe         | 37608       | 65138.96677 | 173.2050808 |
| UIJ68286.1 | DUF3939_domain-containing_protein_[Bacillus_cereus]                            | CPTF_Mn         | 93323       | 80927.31187 | 86.71743501 |
| UIJ68286.1 | DUF3939_domain-containing_protein_[Bacillus_cereus]                            | CPTF_Ni         | 239704.6667 | 43425.57215 | 18.11628149 |
| UIJ68286.1 | DUF3939_domain-containing_protein_[Bacillus_cereus]                            | CPTF_U          | 160184      | 172020.1743 | 107.3891114 |
| UIJ68286.1 | DUF3939_domain-containing_protein_[Bacillus_cereus]                            | CPTF_metals_mix | 240176.8333 | 69828.50389 | 29.07378822 |
| UIJ68286.1 | DUF3939_domain-containing_protein_[Bacillus_cereus]                            | CPTF_zcontrol   | 110420      | 96012.27996 | 86.95189274 |
| UIJ68287.1 | alpha/beta_hydrolase_[Bacillus_cereus]                                         | CPTF_Al         | 0           | 0           | 0           |
| UIJ68287.1 | alpha/beta_hydrolase_[Bacillus_cereus]                                         | CPTF_Cd         | 0           | 0           | 0           |
| UIJ68287.1 | alpha/beta_hydrolase_[Bacillus_cereus]                                         | CPTF_Co         | 51459.63333 | 16948.41823 | 32.93536533 |
| UIJ68287.1 | alpha/beta_hydrolase_[Bacillus_cereus]                                         | CPTF_Cu         | 0           | 0           | 0           |
| UIJ68287.1 | alpha/beta_hydrolase_[Bacillus_cereus]                                         | CPTF_Fe         | 14101.36667 | 24424.28352 | 173.2050808 |
| UIJ68287.1 | alpha/beta_hydrolase_[Bacillus_cereus]                                         | CPTF_Mn         | 0           | 0           | 0           |

|            |                                                                     |                 |             |             |             |
|------------|---------------------------------------------------------------------|-----------------|-------------|-------------|-------------|
| UIJ68287.1 | alpha/beta_hydrolase_[Bacillus_cereus]                              | CPTF_Ni         | 0           | 0           | 0           |
| UIJ68287.1 | alpha/beta_hydrolase_[Bacillus_cereus]                              | CPTF_U          | 0           | 0           | 0           |
| UIJ68287.1 | alpha/beta_hydrolase_[Bacillus_cereus]                              | CPTF_metals_mix | 0           | 0           | 0           |
| UIJ68287.1 | alpha/beta_hydrolase_[Bacillus_cereus]                              | CPTF_zcontrol   | 0           | 0           | 0           |
| UIJ68291.1 | GNAT_family_N-acetyltransferase_[Bacillus_cereus]                   | CPTF_Al         | 332392.8333 | 137964.4298 | 41.50643936 |
| UIJ68291.1 | GNAT_family_N-acetyltransferase_[Bacillus_cereus]                   | CPTF_Cd         | 121418.6    | 37913.12232 | 31.22513546 |
| UIJ68291.1 | GNAT_family_N-acetyltransferase_[Bacillus_cereus]                   | CPTF_Co         | 407045.5    | 149514.6026 | 36.73166823 |
| UIJ68291.1 | GNAT_family_N-acetyltransferase_[Bacillus_cereus]                   | CPTF_Cu         | 414919.1667 | 60439.5348  | 14.56658059 |
| UIJ68291.1 | GNAT_family_N-acetyltransferase_[Bacillus_cereus]                   | CPTF_Fe         | 311347.8667 | 152454.1269 | 48.96584921 |
| UIJ68291.1 | GNAT_family_N-acetyltransferase_[Bacillus_cereus]                   | CPTF_Mn         | 241293.0667 | 250821.086  | 103.9487331 |
| UIJ68291.1 | GNAT_family_N-acetyltransferase_[Bacillus_cereus]                   | CPTF_Ni         | 523322.6667 | 143459.787  | 27.41325689 |
| UIJ68291.1 | GNAT_family_N-acetyltransferase_[Bacillus_cereus]                   | CPTF_U          | 534183.6667 | 75821.96194 | 14.19398733 |
| UIJ68291.1 | GNAT_family_N-acetyltransferase_[Bacillus_cereus]                   | CPTF_metals_mix | 160701      | 53429.57948 | 33.24782016 |
| UIJ68291.1 | GNAT_family_N-acetyltransferase_[Bacillus_cereus]                   | CPTF_zcontrol   | 379955.6667 | 117908.5086 | 31.03217532 |
| UIJ68298.1 | NADPH_dehydrogenase_NamA_[Bacillus_cereus]                          | CPTF_Al         | 6595.233333 | 11423.27922 | 173.2050808 |
| UIJ68298.1 | NADPH_dehydrogenase_NamA_[Bacillus_cereus]                          | CPTF_Cd         | 0           | 0           | 0           |
| UIJ68298.1 | NADPH_dehydrogenase_NamA_[Bacillus_cereus]                          | CPTF_Co         | 7203.966667 | 12477.63628 | 173.2050808 |
| UIJ68298.1 | NADPH_dehydrogenase_NamA_[Bacillus_cereus]                          | CPTF_Cu         | 0           | 0           | 0           |
| UIJ68298.1 | NADPH_dehydrogenase_NamA_[Bacillus_cereus]                          | CPTF_Fe         | 0           | 0           | 0           |
| UIJ68298.1 | NADPH_dehydrogenase_NamA_[Bacillus_cereus]                          | CPTF_Mn         | 0           | 0           | 0           |
| UIJ68298.1 | NADPH_dehydrogenase_NamA_[Bacillus_cereus]                          | CPTF_Ni         | 0           | 0           | 0           |
| UIJ68298.1 | NADPH_dehydrogenase_NamA_[Bacillus_cereus]                          | CPTF_U          | 8475.766667 | 14680.4585  | 173.2050808 |
| UIJ68298.1 | NADPH_dehydrogenase_NamA_[Bacillus_cereus]                          | CPTF_metals_mix | 112518.1667 | 20563.75112 | 18.27593866 |
| UIJ68298.1 | NADPH_dehydrogenase_NamA_[Bacillus_cereus]                          | CPTF_zcontrol   | 0           | 0           | 0           |
| UIJ68301.1 | peptide_ABC_transporter_substrate-binding_protein_[Bacillus_cereus] | CPTF_Al         | 625499.5667 | 459683.4976 | 73.49061807 |
| UIJ68301.1 | peptide_ABC_transporter_substrate-binding_protein_[Bacillus_cereus] | CPTF_Cd         | 187857.3333 | 113693.2439 | 60.52105704 |
| UIJ68301.1 | peptide_ABC_transporter_substrate-binding_protein_[Bacillus_cereus] | CPTF_Co         | 361313.7    | 421397.1061 | 116.6291525 |
| UIJ68301.1 | peptide_ABC_transporter_substrate-binding_protein_[Bacillus_cereus] | CPTF_Cu         | 797029.8667 | 241568.7602 | 30.30862083 |
| UIJ68301.1 | peptide_ABC_transporter_substrate-binding_protein_[Bacillus_cereus] | CPTF_Fe         | 498130.6667 | 635981.3768 | 127.6736044 |
| UIJ68301.1 | peptide_ABC_transporter_substrate-binding_protein_[Bacillus_cereus] | CPTF_Mn         | 581743.6667 | 819507.4111 | 140.870878  |
| UIJ68301.1 | peptide_ABC_transporter_substrate-binding_protein_[Bacillus_cereus] | CPTF_Ni         | 1724802.6   | 526423.1582 | 30.52077717 |
| UIJ68301.1 | peptide_ABC_transporter_substrate-binding_protein_[Bacillus_cereus] | CPTF_U          | 1285595.633 | 166721.8329 | 12.96845047 |
| UIJ68301.1 | peptide_ABC_transporter_substrate-binding_protein_[Bacillus_cereus] | CPTF_metals_mix | 12080.1     | 11990.91782 | 99.26174302 |
| UIJ68301.1 | peptide_ABC_transporter_substrate-binding_protein_[Bacillus_cereus] | CPTF_zcontrol   | 501159.7    | 754930.9241 | 150.6367978 |
| UIJ68304.1 | phosphoserine_phosphatase_1_[Bacillus_cereus]                       | CPTF_Al         | 31123.53333 | 27576.07415 | 88.60200368 |
| UIJ68304.1 | phosphoserine_phosphatase_1_[Bacillus_cereus]                       | CPTF_Cd         | 21582.13333 | 37381.35147 | 173.2050808 |
| UIJ68304.1 | phosphoserine_phosphatase_1_[Bacillus_cereus]                       | CPTF_Co         | 29711.26667 | 27815.45102 | 93.61920288 |
| UIJ68304.1 | phosphoserine_phosphatase_1_[Bacillus_cereus]                       | CPTF_Cu         | 15883.03333 | 27510.22071 | 173.2050808 |
| UIJ68304.1 | phosphoserine_phosphatase_1_[Bacillus_cereus]                       | CPTF_Fe         | 17476.53333 | 30270.24367 | 173.2050808 |
| UIJ68304.1 | phosphoserine_phosphatase_1_[Bacillus_cereus]                       | CPTF_Mn         | 0           | 0           | 0           |
| UIJ68304.1 | phosphoserine_phosphatase_1_[Bacillus_cereus]                       | CPTF_Ni         | 6866.9      | 11893.81969 | 173.2050808 |
| UIJ68304.1 | phosphoserine_phosphatase_1_[Bacillus_cereus]                       | CPTF_U          | 0           | 0           | 0           |
| UIJ68304.1 | phosphoserine_phosphatase_1_[Bacillus_cereus]                       | CPTF_metals_mix | 47318.16667 | 40988.7033  | 86.6236082  |
| UIJ68304.1 | phosphoserine_phosphatase_1_[Bacillus_cereus]                       | CPTF_zcontrol   | 14401.5     | 24944.12971 | 173.2050808 |
| UIJ68307.1 | NUDIX_hydrolase_[Bacillus_cereus]                                   | CPTF_Al         | 0           | 0           | 0           |
| UIJ68307.1 | NUDIX_hydrolase_[Bacillus_cereus]                                   | CPTF_Cd         | 0           | 0           | 0           |
| UIJ68307.1 | NUDIX_hydrolase_[Bacillus_cereus]                                   | CPTF_Co         | 0           | 0           | 0           |
| UIJ68307.1 | NUDIX_hydrolase_[Bacillus_cereus]                                   | CPTF_Cu         | 15496.16667 | 26840.14799 | 173.2050808 |
| UIJ68307.1 | NUDIX_hydrolase_[Bacillus_cereus]                                   | CPTF_Fe         | 12344.23333 | 21380.83931 | 173.2050808 |
| UIJ68307.1 | NUDIX_hydrolase_[Bacillus_cereus]                                   | CPTF_Mn         | 0           | 0           | 0           |
| UIJ68307.1 | NUDIX_hydrolase_[Bacillus_cereus]                                   | CPTF_Ni         | 14178.76667 | 24558.34426 | 173.2050808 |
| UIJ68307.1 | NUDIX_hydrolase_[Bacillus_cereus]                                   | CPTF_U          | 35456.3     | 41253.3588  | 116.3498696 |
| UIJ68307.1 | NUDIX_hydrolase_[Bacillus_cereus]                                   | CPTF_metals_mix | 0           | 0           | 0           |
| UIJ68307.1 | NUDIX_hydrolase_[Bacillus_cereus]                                   | CPTF_zcontrol   | 17853.6     | 30923.3423  | 173.2050808 |
| UIJ68320.1 | cyclic_di-AMP_binding_protein_CbpA_[Bacillus_cereus]                | CPTF_Al         | 816891.9333 | 402040.5299 | 49.21587709 |
| UIJ68320.1 | cyclic_di-AMP_binding_protein_CbpA_[Bacillus_cereus]                | CPTF_Cd         | 396033.5667 | 194015.7229 | 48.98971683 |
| UIJ68320.1 | cyclic_di-AMP_binding_protein_CbpA_[Bacillus_cereus]                | CPTF_Co         | 1020278.267 | 146659.4321 | 14.37445419 |
| UIJ68320.1 | cyclic_di-AMP_binding_protein_CbpA_[Bacillus_cereus]                | CPTF_Cu         | 1282053.3   | 547737.9181 | 42.72349036 |
| UIJ68320.1 | cyclic_di-AMP_binding_protein_CbpA_[Bacillus_cereus]                | CPTF_Fe         | 595621.9333 | 417976.753  | 70.17484239 |
| UIJ68320.1 | cyclic_di-AMP_binding_protein_CbpA_[Bacillus_cereus]                | CPTF_Mn         | 705156.5333 | 369837.8046 | 52.44761795 |
| UIJ68320.1 | cyclic_di-AMP_binding_protein_CbpA_[Bacillus_cereus]                | CPTF_Ni         | 504222.2667 | 201263.9159 | 39.9157136  |



|            |                                                      |                 |             |             |             |
|------------|------------------------------------------------------|-----------------|-------------|-------------|-------------|
| UIJ68320.1 | cyclic_di-AMP_binding_protein_CbpA_[Bacillus_cereus] | CPTF_U          | 565803.4    | 211076.5393 | 37.30563289 |
| UIJ68320.1 | cyclic_di-AMP_binding_protein_CbpA_[Bacillus_cereus] | CPTF_metals_mix | 2692924.767 | 445795.6314 | 16.55432921 |
| UIJ68320.1 | cyclic_di-AMP_binding_protein_CbpA_[Bacillus_cereus] | CPTF_zcontrol   | 574377.8333 | 392751.5888 | 68.37861178 |
| UIJ68322.1 | chaperone_CsaA_[Bacillus_cereus]                     | CPTF_Al         | 41242.36667 | 41908.31151 | 101.6147105 |
| UIJ68322.1 | chaperone_CsaA_[Bacillus_cereus]                     | CPTF_Cd         | 190540.3333 | 24796.11837 | 13.01357982 |
| UIJ68322.1 | chaperone_CsaA_[Bacillus_cereus]                     | CPTF_Co         | 24887.06667 | 43105.66392 | 173.2050808 |
| UIJ68322.1 | chaperone_CsaA_[Bacillus_cereus]                     | CPTF_Cu         | 0           | 0           | 0           |
| UIJ68322.1 | chaperone_CsaA_[Bacillus_cereus]                     | CPTF_Fe         | 94421.66667 | 83622.04185 | 88.56234464 |
| UIJ68322.1 | chaperone_CsaA_[Bacillus_cereus]                     | CPTF_Mn         | 32679.23333 | 56602.09249 | 173.2050808 |
| UIJ68322.1 | chaperone_CsaA_[Bacillus_cereus]                     | CPTF_Ni         | 0           | 0           | 0           |
| UIJ68322.1 | chaperone_CsaA_[Bacillus_cereus]                     | CPTF_U          | 0           | 0           | 0           |
| UIJ68322.1 | chaperone_CsaA_[Bacillus_cereus]                     | CPTF_metals_mix | 111190.3    | 22361.87747 | 20.11135636 |
| UIJ68322.1 | chaperone_CsaA_[Bacillus_cereus]                     | CPTF_zcontrol   | 0           | 0           | 0           |
| UIJ68328.1 | NUDIX_domain-containing_protein_[Bacillus_cereus]    | CPTF_Al         | 402278.8333 | 102552.2111 | 25.49281807 |
| UIJ68328.1 | NUDIX_domain-containing_protein_[Bacillus_cereus]    | CPTF_Cd         | 390534.7    | 104954.3978 | 26.87453838 |
| UIJ68328.1 | NUDIX_domain-containing_protein_[Bacillus_cereus]    | CPTF_Co         | 294226.0667 | 161587.2939 | 54.91943515 |
| UIJ68328.1 | NUDIX_domain-containing_protein_[Bacillus_cereus]    | CPTF_Cu         | 285235.6    | 61678.96284 | 21.62386562 |
| UIJ68328.1 | NUDIX_domain-containing_protein_[Bacillus_cereus]    | CPTF_Fe         | 290916.6    | 144824.6094 | 49.78217447 |
| UIJ68328.1 | NUDIX_domain-containing_protein_[Bacillus_cereus]    | CPTF_Mn         | 287253.1333 | 122907.3855 | 42.78713486 |
| UIJ68328.1 | NUDIX_domain-containing_protein_[Bacillus_cereus]    | CPTF_Ni         | 349776.2667 | 51764.86084 | 14.79942059 |
| UIJ68328.1 | NUDIX_domain-containing_protein_[Bacillus_cereus]    | CPTF_U          | 206400.4667 | 157839.5383 | 76.47247164 |
| UIJ68328.1 | NUDIX_domain-containing_protein_[Bacillus_cereus]    | CPTF_metals_mix | 132691.1667 | 31153.30655 | 23.4780561  |
| UIJ68328.1 | NUDIX_domain-containing_protein_[Bacillus_cereus]    | CPTF_zcontrol   | 278899.9667 | 49572.92318 | 17.77444572 |
| UIJ68331.1 | SPFH/Band_7/PHB_domain_protein_[Bacillus_cereus]     | CPTF_Al         | 35027.33333 | 60669.12099 | 173.2050808 |
| UIJ68331.1 | SPFH/Band_7/PHB_domain_protein_[Bacillus_cereus]     | CPTF_Cd         | 0           | 0           | 0           |
| UIJ68331.1 | SPFH/Band_7/PHB_domain_protein_[Bacillus_cereus]     | CPTF_Co         | 93500.66667 | 82644.3466  | 88.38904528 |
| UIJ68331.1 | SPFH/Band_7/PHB_domain_protein_[Bacillus_cereus]     | CPTF_Cu         | 0           | 0           | 0           |
| UIJ68331.1 | SPFH/Band_7/PHB_domain_protein_[Bacillus_cereus]     | CPTF_Fe         | 0           | 0           | 0           |
| UIJ68331.1 | SPFH/Band_7/PHB_domain_protein_[Bacillus_cereus]     | CPTF_Mn         | 101620.6667 | 92016.08199 | 90.54859115 |
| UIJ68331.1 | SPFH/Band_7/PHB_domain_protein_[Bacillus_cereus]     | CPTF_Ni         | 89857.66667 | 79334.49597 | 88.28906749 |
| UIJ68331.1 | SPFH/Band_7/PHB_domain_protein_[Bacillus_cereus]     | CPTF_U          | 0           | 0           | 0           |
| UIJ68331.1 | SPFH/Band_7/PHB_domain_protein_[Bacillus_cereus]     | CPTF_metals_mix | 0           | 0           | 0           |
| UIJ68331.1 | SPFH/Band_7/PHB_domain_protein_[Bacillus_cereus]     | CPTF_zcontrol   | 0           | 0           | 0           |
| UIJ68339.1 | glycosyl_transferase_[Bacillus_cereus]               | CPTF_Al         | 1158390.1   | 162033.5525 | 13.98782262 |
| UIJ68339.1 | glycosyl_transferase_[Bacillus_cereus]               | CPTF_Cd         | 1527484.6   | 383050.028  | 25.07717773 |
| UIJ68339.1 | glycosyl_transferase_[Bacillus_cereus]               | CPTF_Co         | 1596908.333 | 275926.869  | 17.27881703 |
| UIJ68339.1 | glycosyl_transferase_[Bacillus_cereus]               | CPTF_Cu         | 2932187.3   | 226594.615  | 7.727835635 |
| UIJ68339.1 | glycosyl_transferase_[Bacillus_cereus]               | CPTF_Fe         | 1552469.033 | 149626.8504 | 9.637992592 |
| UIJ68339.1 | glycosyl_transferase_[Bacillus_cereus]               | CPTF_Mn         | 1120446.2   | 148718.9611 | 13.27319072 |
| UIJ68339.1 | glycosyl_transferase_[Bacillus_cereus]               | CPTF_Ni         | 1480889.933 | 743472.9187 | 50.20446841 |
| UIJ68339.1 | glycosyl_transferase_[Bacillus_cereus]               | CPTF_U          | 771446.9667 | 524154.5055 | 67.94433424 |
| UIJ68339.1 | glycosyl_transferase_[Bacillus_cereus]               | CPTF_metals_mix | 1395683.6   | 160976.3745 | 11.53387305 |
| UIJ68339.1 | glycosyl_transferase_[Bacillus_cereus]               | CPTF_zcontrol   | 635708.2667 | 276599.6487 | 43.51046907 |
| UIJ68342.1 | GNAT_family_N-acetyltransferase_[Bacillus_cereus]    | CPTF_Al         | 781521.6667 | 82731.27272 | 10.58592183 |
| UIJ68342.1 | GNAT_family_N-acetyltransferase_[Bacillus_cereus]    | CPTF_Cd         | 771752      | 59570.34244 | 7.718845231 |
| UIJ68342.1 | GNAT_family_N-acetyltransferase_[Bacillus_cereus]    | CPTF_Co         | 638256      | 97425.73142 | 15.26436593 |
| UIJ68342.1 | GNAT_family_N-acetyltransferase_[Bacillus_cereus]    | CPTF_Cu         | 773201.6667 | 86847.06851 | 11.23213674 |
| UIJ68342.1 | GNAT_family_N-acetyltransferase_[Bacillus_cereus]    | CPTF_Fe         | 635252.3333 | 56134.08784 | 8.836502425 |
| UIJ68342.1 | GNAT_family_N-acetyltransferase_[Bacillus_cereus]    | CPTF_Mn         | 834639      | 57254.8202  | 6.859830442 |
| UIJ68342.1 | GNAT_family_N-acetyltransferase_[Bacillus_cereus]    | CPTF_Ni         | 683818.6667 | 44923.54445 | 6.569511282 |
| UIJ68342.1 | GNAT_family_N-acetyltransferase_[Bacillus_cereus]    | CPTF_U          | 633724.3333 | 127120.1474 | 20.0592183  |
| UIJ68342.1 | GNAT_family_N-acetyltransferase_[Bacillus_cereus]    | CPTF_metals_mix | 543874.3333 | 93668.29125 | 17.22241435 |
| UIJ68342.1 | GNAT_family_N-acetyltransferase_[Bacillus_cereus]    | CPTF_zcontrol   | 548119.6667 | 241945.825  | 44.14105892 |
| UIJ68347.1 | GNAT_family_N-acetyltransferase_[Bacillus_cereus]    | CPTF_Al         | 152931.3333 | 12990.46044 | 8.494309278 |
| UIJ68347.1 | GNAT_family_N-acetyltransferase_[Bacillus_cereus]    | CPTF_Cd         | 150207.3333 | 10252.76813 | 6.825744058 |
| UIJ68347.1 | GNAT_family_N-acetyltransferase_[Bacillus_cereus]    | CPTF_Co         | 161606.3333 | 62417.6163  | 38.62324886 |
| UIJ68347.1 | GNAT_family_N-acetyltransferase_[Bacillus_cereus]    | CPTF_Cu         | 202149.5667 | 47893.35095 | 23.69203741 |
| UIJ68347.1 | GNAT_family_N-acetyltransferase_[Bacillus_cereus]    | CPTF_Fe         | 153055.6667 | 12635.09724 | 8.255229955 |
| UIJ68347.1 | GNAT_family_N-acetyltransferase_[Bacillus_cereus]    | CPTF_Mn         | 108959.3333 | 50624.49115 | 46.46182167 |
| UIJ68347.1 | GNAT_family_N-acetyltransferase_[Bacillus_cereus]    | CPTF_Ni         | 154441.6667 | 5206.639447 | 3.371266032 |
| UIJ68347.1 | GNAT_family_N-acetyltransferase_[Bacillus_cereus]    | CPTF_U          | 127866      | 14863.87032 | 11.62456816 |

|            |                                                           |                 |             |             |             |
|------------|-----------------------------------------------------------|-----------------|-------------|-------------|-------------|
| UIJ68347.1 | GNAT_family_N-acetyltransferase_[Bacillus_cereus]         | CPTF_metals_mix | 83431.3     | 10802.29066 | 12.94752768 |
| UIJ68347.1 | GNAT_family_N-acetyltransferase_[Bacillus_cereus]         | CPTF_zcontrol   | 9944.4      | 34859.29537 | 35.05511323 |
| UIJ68350.1 | WXG100_family_type_VII_secretion_target_[Bacillus_cereus] | CPTF_Al         | 32891336.67 | 1049399.735 | 3.190504982 |
| UIJ68350.1 | WXG100_family_type_VII_secretion_target_[Bacillus_cereus] | CPTF_Cd         | 31632190.13 | 1625590.517 | 5.139038777 |
| UIJ68350.1 | WXG100_family_type_VII_secretion_target_[Bacillus_cereus] | CPTF_Co         | 29235820.37 | 2910591.696 | 9.955567041 |
| UIJ68350.1 | WXG100_family_type_VII_secretion_target_[Bacillus_cereus] | CPTF_Cu         | 27072519.67 | 879960.5097 | 3.250382752 |
| UIJ68350.1 | WXG100_family_type_VII_secretion_target_[Bacillus_cereus] | CPTF_Fe         | 33318110.67 | 4696634.172 | 14.09634003 |
| UIJ68350.1 | WXG100_family_type_VII_secretion_target_[Bacillus_cereus] | CPTF_Mn         | 32188686.3  | 1386237.054 | 4.306597171 |
| UIJ68350.1 | WXG100_family_type_VII_secretion_target_[Bacillus_cereus] | CPTF_Ni         | 29117643.33 | 1776377.301 | 6.100690502 |
| UIJ68350.1 | WXG100_family_type_VII_secretion_target_[Bacillus_cereus] | CPTF_U          | 31557075.33 | 5119569.155 | 16.22320542 |
| UIJ68350.1 | WXG100_family_type_VII_secretion_target_[Bacillus_cereus] | CPTF_metals_mix | 21242823.33 | 905610.333  | 4.263135454 |
| UIJ68350.1 | WXG100_family_type_VII_secretion_target_[Bacillus_cereus] | CPTF_zcontrol   | 31847917    | 356691.0816 | 1.119982452 |
| UIJ68351.1 | type_VII_secretion_protein_EsaA_[Bacillus_cereus]         | CPTF_Al         | 308353.7667 | 230027.1198 | 74.59844655 |
| UIJ68351.1 | type_VII_secretion_protein_EsaA_[Bacillus_cereus]         | CPTF_Cd         | 126676.1667 | 144937.3549 | 114.4156463 |
| UIJ68351.1 | type_VII_secretion_protein_EsaA_[Bacillus_cereus]         | CPTF_Co         | 8974.066667 | 15543.53942 | 173.2050808 |
| UIJ68351.1 | type_VII_secretion_protein_EsaA_[Bacillus_cereus]         | CPTF_Cu         | 37459.6     | 36796.37674 | 98.22949722 |
| UIJ68351.1 | type_VII_secretion_protein_EsaA_[Bacillus_cereus]         | CPTF_Fe         | 52926.8     | 91671.90668 | 173.2050808 |
| UIJ68351.1 | type_VII_secretion_protein_EsaA_[Bacillus_cereus]         | CPTF_Mn         | 24068.06667 | 41687.11431 | 173.2050808 |
| UIJ68351.1 | type_VII_secretion_protein_EsaA_[Bacillus_cereus]         | CPTF_Ni         | 130270.7    | 152331.9143 | 116.9349011 |
| UIJ68351.1 | type_VII_secretion_protein_EsaA_[Bacillus_cereus]         | CPTF_U          | 124447.5    | 215549.3929 | 173.2050808 |
| UIJ68351.1 | type_VII_secretion_protein_EsaA_[Bacillus_cereus]         | CPTF_metals_mix | 0           | 0           | 0           |
| UIJ68351.1 | type_VII_secretion_protein_EsaA_[Bacillus_cereus]         | CPTF_zcontrol   | 215713      | 231682.3381 | 107.4030485 |
| UIJ68355.1 | type_VII_secretion_protein_EssC_[Bacillus_cereus]         | CPTF_Al         | 105697.8333 | 39898.11021 | 37.74733025 |
| UIJ68355.1 | type_VII_secretion_protein_EssC_[Bacillus_cereus]         | CPTF_Cd         | 90932.5     | 115735.5101 | 127.2762875 |
| UIJ68355.1 | type_VII_secretion_protein_EssC_[Bacillus_cereus]         | CPTF_Co         | 111353.7667 | 58567.48431 | 52.59587176 |
| UIJ68355.1 | type_VII_secretion_protein_EssC_[Bacillus_cereus]         | CPTF_Cu         | 90225.83333 | 74208.23923 | 82.24721954 |
| UIJ68355.1 | type_VII_secretion_protein_EssC_[Bacillus_cereus]         | CPTF_Fe         | 53641.4     | 53573.62909 | 99.87365931 |
| UIJ68355.1 | type_VII_secretion_protein_EssC_[Bacillus_cereus]         | CPTF_Mn         | 154838.5    | 138316.441  | 89.32948914 |
| UIJ68355.1 | type_VII_secretion_protein_EssC_[Bacillus_cereus]         | CPTF_Ni         | 178844.1    | 137811.6589 | 77.05686621 |
| UIJ68355.1 | type_VII_secretion_protein_EssC_[Bacillus_cereus]         | CPTF_U          | 99060.83333 | 64419.93477 | 65.03068125 |
| UIJ68355.1 | type_VII_secretion_protein_EssC_[Bacillus_cereus]         | CPTF_metals_mix | 24934.76667 | 21697.83499 | 87.01839996 |
| UIJ68355.1 | type_VII_secretion_protein_EssC_[Bacillus_cereus]         | CPTF_zcontrol   | 163745.8333 | 68066.43234 | 41.56834464 |
| UIJ68377.1 | formate--tetrahydrofolate_ligase_[Bacillus_cereus]        | CPTF_Al         | 9345438.467 | 792428.0649 | 8.479303221 |
| UIJ68377.1 | formate--tetrahydrofolate_ligase_[Bacillus_cereus]        | CPTF_Cd         | 9568694.8   | 346445.0416 | 3.620609172 |
| UIJ68377.1 | formate--tetrahydrofolate_ligase_[Bacillus_cereus]        | CPTF_Co         | 8716594.733 | 993187.923  | 11.39421934 |
| UIJ68377.1 | formate--tetrahydrofolate_ligase_[Bacillus_cereus]        | CPTF_Cu         | 9194117.433 | 730117.8196 | 7.941140896 |
| UIJ68377.1 | formate--tetrahydrofolate_ligase_[Bacillus_cereus]        | CPTF_Fe         | 8307506.1   | 547673.9164 | 6.592518979 |
| UIJ68377.1 | formate--tetrahydrofolate_ligase_[Bacillus_cereus]        | CPTF_Mn         | 8467607.367 | 270954.2633 | 3.199891677 |
| UIJ68377.1 | formate--tetrahydrofolate_ligase_[Bacillus_cereus]        | CPTF_Ni         | 8256042.733 | 796401.8496 | 9.646290303 |
| UIJ68377.1 | formate--tetrahydrofolate_ligase_[Bacillus_cereus]        | CPTF_U          | 7839751.5   | 893632.7899 | 11.39873872 |
| UIJ68377.1 | formate--tetrahydrofolate_ligase_[Bacillus_cereus]        | CPTF_metals_mix | 10791581.6  | 709009.1889 | 6.570021107 |
| UIJ68377.1 | formate--tetrahydrofolate_ligase_[Bacillus_cereus]        | CPTF_zcontrol   | 9037445.267 | 417909.6884 | 4.624201597 |
| UIJ68379.1 | DEAD/DEAH_box_helicase_[Bacillus_cereus]                  | CPTF_Al         | 1252817.167 | 229141.2188 | 18.29007655 |
| UIJ68379.1 | DEAD/DEAH_box_helicase_[Bacillus_cereus]                  | CPTF_Cd         | 752116      | 240672.3453 | 31.99936516 |
| UIJ68379.1 | DEAD/DEAH_box_helicase_[Bacillus_cereus]                  | CPTF_Co         | 463806.9333 | 343099.7391 | 73.97468956 |
| UIJ68379.1 | DEAD/DEAH_box_helicase_[Bacillus_cereus]                  | CPTF_Cu         | 742350.8667 | 601069.3904 | 80.9683692  |
| UIJ68379.1 | DEAD/DEAH_box_helicase_[Bacillus_cereus]                  | CPTF_Fe         | 1429200.167 | 131431.0947 | 9.196129262 |
| UIJ68379.1 | DEAD/DEAH_box_helicase_[Bacillus_cereus]                  | CPTF_Mn         | 1091719.633 | 866582.825  | 79.37778149 |
| UIJ68379.1 | DEAD/DEAH_box_helicase_[Bacillus_cereus]                  | CPTF_Ni         | 712752.4667 | 1077268.62  | 151.1420402 |
| UIJ68379.1 | DEAD/DEAH_box_helicase_[Bacillus_cereus]                  | CPTF_U          | 728332.5333 | 977521.2061 | 134.2135853 |
| UIJ68379.1 | DEAD/DEAH_box_helicase_[Bacillus_cereus]                  | CPTF_metals_mix | 593329.3    | 177969.8831 | 29.99512802 |
| UIJ68379.1 | DEAD/DEAH_box_helicase_[Bacillus_cereus]                  | CPTF_zcontrol   | 896205.2667 | 674973.8887 | 75.31465322 |
| UIJ68381.1 | VOC_family_protein_[Bacillus_cereus]                      | CPTF_Al         | 216106.3333 | 33317.87258 | 15.4173513  |
| UIJ68381.1 | VOC_family_protein_[Bacillus_cereus]                      | CPTF_Cd         | 238908      | 9181.744442 | 3.843213472 |
| UIJ68381.1 | VOC_family_protein_[Bacillus_cereus]                      | CPTF_Co         | 203012.6667 | 68389.04211 | 33.68708132 |
| UIJ68381.1 | VOC_family_protein_[Bacillus_cereus]                      | CPTF_Cu         | 215919.3333 | 43077.2339  | 19.95061453 |
| UIJ68381.1 | VOC_family_protein_[Bacillus_cereus]                      | CPTF_Fe         | 221173.3333 | 21535.22144 | 9.736807377 |
| UIJ68381.1 | VOC_family_protein_[Bacillus_cereus]                      | CPTF_Mn         | 149557.1    | 75282.74593 | 50.33712604 |
| UIJ68381.1 | VOC_family_protein_[Bacillus_cereus]                      | CPTF_Ni         | 241353.3333 | 19630.12818 | 8.133356978 |
| UIJ68381.1 | VOC_family_protein_[Bacillus_cereus]                      | CPTF_U          | 207022      | 29053.9731  | 14.03424424 |
| UIJ68381.1 | VOC_family_protein_[Bacillus_cereus]                      | CPTF_metals_mix | 162421.6667 | 12780.70046 | 7.868839623 |

|            |                                                                            |                 |             |             |             |
|------------|----------------------------------------------------------------------------|-----------------|-------------|-------------|-------------|
| UIJ68381.1 | VOC_family_protein_[Bacillus_cereus]                                       | CPTF_zcontrol   | 179438.3333 | 7511.923877 | 4.186354018 |
| UIJ68387.1 | MBL_fold_metallo-hydrolase_[Bacillus_cereus]                               | CPTF_Al         | 64792.96667 | 58012.65097 | 89.53541403 |
| UIJ68387.1 | MBL_fold_metallo-hydrolase_[Bacillus_cereus]                               | CPTF_Cd         | 57451.2     | 83221.77895 | 144.8564677 |
| UIJ68387.1 | MBL_fold_metallo-hydrolase_[Bacillus_cereus]                               | CPTF_Co         | 41033.33333 | 71071.81814 | 173.2050808 |
| UIJ68387.1 | MBL_fold_metallo-hydrolase_[Bacillus_cereus]                               | CPTF_Cu         | 0           | 0           | 0           |
| UIJ68387.1 | MBL_fold_metallo-hydrolase_[Bacillus_cereus]                               | CPTF_Fe         | 8252.433333 | 14293.63382 | 173.2050808 |
| UIJ68387.1 | MBL_fold_metallo-hydrolase_[Bacillus_cereus]                               | CPTF_Mn         | 0           | 0           | 0           |
| UIJ68387.1 | MBL_fold_metallo-hydrolase_[Bacillus_cereus]                               | CPTF_Ni         | 0           | 0           | 0           |
| UIJ68387.1 | MBL_fold_metallo-hydrolase_[Bacillus_cereus]                               | CPTF_U          | 0           | 0           | 0           |
| UIJ68387.1 | MBL_fold_metallo-hydrolase_[Bacillus_cereus]                               | CPTF_metals_mix | 35816.63333 | 62036.22869 | 173.2050808 |
| UIJ68387.1 | MBL_fold_metallo-hydrolase_[Bacillus_cereus]                               | CPTF_zcontrol   | 43659       | 75619.60621 | 173.2050808 |
| UIJ68392.1 | nitrate_reductase_subunit_alpha_[Bacillus_cereus]                          | CPTF_Al         | 45678087.17 | 3404746.608 | 7.453785434 |
| UIJ68392.1 | nitrate_reductase_subunit_alpha_[Bacillus_cereus]                          | CPTF_Cd         | 36336217.63 | 554080.6328 | 1.524871516 |
| UIJ68392.1 | nitrate_reductase_subunit_alpha_[Bacillus_cereus]                          | CPTF_Co         | 39580787.63 | 3098812.528 | 7.829082526 |
| UIJ68392.1 | nitrate_reductase_subunit_alpha_[Bacillus_cereus]                          | CPTF_Cu         | 45685092.3  | 1680683.238 | 3.678843915 |
| UIJ68392.1 | nitrate_reductase_subunit_alpha_[Bacillus_cereus]                          | CPTF_Fe         | 42733287.1  | 2419915.496 | 5.6628349   |
| UIJ68392.1 | nitrate_reductase_subunit_alpha_[Bacillus_cereus]                          | CPTF_Mn         | 47794542.67 | 7078715.002 | 14.81071814 |
| UIJ68392.1 | nitrate_reductase_subunit_alpha_[Bacillus_cereus]                          | CPTF_Ni         | 37290298.63 | 2526641.283 | 6.775599487 |
| UIJ68392.1 | nitrate_reductase_subunit_alpha_[Bacillus_cereus]                          | CPTF_U          | 40433982.03 | 688787.5306 | 1.70348676  |
| UIJ68392.1 | nitrate_reductase_subunit_alpha_[Bacillus_cereus]                          | CPTF_metals_mix | 34769238.3  | 1683031.79  | 4.840577107 |
| UIJ68392.1 | nitrate_reductase_subunit_alpha_[Bacillus_cereus]                          | CPTF_zcontrol   | 51229284.4  | 1693881.531 | 3.306471193 |
| UIJ68393.1 | nitrate_reductase_subunit_beta_[Bacillus_cereus]                           | CPTF_Al         | 5750995.467 | 128864.784  | 2.240738752 |
| UIJ68393.1 | nitrate_reductase_subunit_beta_[Bacillus_cereus]                           | CPTF_Cd         | 3364230.233 | 1024196.74  | 30.44371725 |
| UIJ68393.1 | nitrate_reductase_subunit_beta_[Bacillus_cereus]                           | CPTF_Co         | 4541032.8   | 929887.5104 | 20.47744536 |
| UIJ68393.1 | nitrate_reductase_subunit_beta_[Bacillus_cereus]                           | CPTF_Cu         | 5245437.467 | 885676.4702 | 16.88470172 |
| UIJ68393.1 | nitrate_reductase_subunit_beta_[Bacillus_cereus]                           | CPTF_Fe         | 4532902.5   | 993216.3865 | 21.91126737 |
| UIJ68393.1 | nitrate_reductase_subunit_beta_[Bacillus_cereus]                           | CPTF_Mn         | 5548515.567 | 1668864.585 | 30.0776769  |
| UIJ68393.1 | nitrate_reductase_subunit_beta_[Bacillus_cereus]                           | CPTF_Ni         | 2809536.433 | 734369.1852 | 26.13844677 |
| UIJ68393.1 | nitrate_reductase_subunit_beta_[Bacillus_cereus]                           | CPTF_U          | 3445414.8   | 281576.0415 | 8.172485982 |
| UIJ68393.1 | nitrate_reductase_subunit_beta_[Bacillus_cereus]                           | CPTF_metals_mix | 1425803.867 | 565485.2055 | 39.66079898 |
| UIJ68393.1 | nitrate_reductase_subunit_beta_[Bacillus_cereus]                           | CPTF_zcontrol   | 5729326.267 | 762207.9997 | 13.30362357 |
| UIJ68394.1 | nitrate_reductase_molybdenum_cofactor_assembly_chaperone_[Bacillus_cereus] | CPTF_Al         | 2145825.667 | 115349.137  | 5.375512971 |
| UIJ68394.1 | nitrate_reductase_molybdenum_cofactor_assembly_chaperone_[Bacillus_cereus] | CPTF_Cd         | 1601319.333 | 73455.31108 | 4.587174435 |
| UIJ68394.1 | nitrate_reductase_molybdenum_cofactor_assembly_chaperone_[Bacillus_cereus] | CPTF_Co         | 1739145.667 | 219899.2929 | 12.6440986  |
| UIJ68394.1 | nitrate_reductase_molybdenum_cofactor_assembly_chaperone_[Bacillus_cereus] | CPTF_Cu         | 2174089     | 207269.6261 | 9.533631148 |
| UIJ68394.1 | nitrate_reductase_molybdenum_cofactor_assembly_chaperone_[Bacillus_cereus] | CPTF_Fe         | 1752555     | 157309.0534 | 8.97598383  |
| UIJ68394.1 | nitrate_reductase_molybdenum_cofactor_assembly_chaperone_[Bacillus_cereus] | CPTF_Mn         | 2047534.667 | 91574.14051 | 4.472409772 |
| UIJ68394.1 | nitrate_reductase_molybdenum_cofactor_assembly_chaperone_[Bacillus_cereus] | CPTF_Ni         | 1546200.4   | 270448.4055 | 17.49116127 |
| UIJ68394.1 | nitrate_reductase_molybdenum_cofactor_assembly_chaperone_[Bacillus_cereus] | CPTF_U          | 1913306.867 | 187982.9017 | 9.825026239 |
| UIJ68394.1 | nitrate_reductase_molybdenum_cofactor_assembly_chaperone_[Bacillus_cereus] | CPTF_metals_mix | 1517095     | 108065.8329 | 7.123208033 |
| UIJ68394.1 | nitrate_reductase_molybdenum_cofactor_assembly_chaperone_[Bacillus_cereus] | CPTF_zcontrol   | 2405719     | 57890.81643 | 2.406383141 |
| UIJ68395.1 | respiratory_nitrate_reductase_subunit_gamma_[Bacillus_cereus]              | CPTF_Al         | 1785921     | 131392.9774 | 7.357155072 |
| UIJ68395.1 | respiratory_nitrate_reductase_subunit_gamma_[Bacillus_cereus]              | CPTF_Cd         | 1364710.033 | 226622.5276 | 16.60591057 |
| UIJ68395.1 | respiratory_nitrate_reductase_subunit_gamma_[Bacillus_cereus]              | CPTF_Co         | 1851453.333 | 157948.7228 | 8.531066917 |
| UIJ68395.1 | respiratory_nitrate_reductase_subunit_gamma_[Bacillus_cereus]              | CPTF_Cu         | 2426444     | 247136.1005 | 10.18511453 |
| UIJ68395.1 | respiratory_nitrate_reductase_subunit_gamma_[Bacillus_cereus]              | CPTF_Fe         | 1608542.667 | 211212.7257 | 13.13068842 |
| UIJ68395.1 | respiratory_nitrate_reductase_subunit_gamma_[Bacillus_cereus]              | CPTF_Mn         | 1685694.333 | 336704.4542 | 19.97422947 |
| UIJ68395.1 | respiratory_nitrate_reductase_subunit_gamma_[Bacillus_cereus]              | CPTF_Ni         | 1030987.433 | 379502.636  | 36.80962772 |
| UIJ68395.1 | respiratory_nitrate_reductase_subunit_gamma_[Bacillus_cereus]              | CPTF_U          | 1336459     | 264308.3406 | 19.77676387 |
| UIJ68395.1 | respiratory_nitrate_reductase_subunit_gamma_[Bacillus_cereus]              | CPTF_metals_mix | 1083485.333 | 108334.614  | 9.998715315 |
| UIJ68395.1 | respiratory_nitrate_reductase_subunit_gamma_[Bacillus_cereus]              | CPTF_zcontrol   | 2152138.333 | 325170.1062 | 15.10916381 |
| UIJ68397.1 | GTP_3',8-cyclase_MoaA_[Bacillus_cereus]                                    | CPTF_Al         | 17263.9     | 29901.95194 | 173.2050808 |
| UIJ68397.1 | GTP_3',8-cyclase_MoaA_[Bacillus_cereus]                                    | CPTF_Cd         | 0           | 0           | 0           |
| UIJ68397.1 | GTP_3',8-cyclase_MoaA_[Bacillus_cereus]                                    | CPTF_Co         | 32866.7     | 56926.79428 | 173.2050808 |
| UIJ68397.1 | GTP_3',8-cyclase_MoaA_[Bacillus_cereus]                                    | CPTF_Cu         | 29798.76667 | 51612.97787 | 173.2050808 |
| UIJ68397.1 | GTP_3',8-cyclase_MoaA_[Bacillus_cereus]                                    | CPTF_Fe         | 0           | 0           | 0           |
| UIJ68397.1 | GTP_3',8-cyclase_MoaA_[Bacillus_cereus]                                    | CPTF_Mn         | 141269.1667 | 195119.9864 | 138.1193016 |
| UIJ68397.1 | GTP_3',8-cyclase_MoaA_[Bacillus_cereus]                                    | CPTF_Ni         | 0           | 0           | 0           |
| UIJ68397.1 | GTP_3',8-cyclase_MoaA_[Bacillus_cereus]                                    | CPTF_U          | 157320.6333 | 272487.33   | 173.2050808 |
| UIJ68397.1 | GTP_3',8-cyclase_MoaA_[Bacillus_cereus]                                    | CPTF_metals_mix | 38959.66667 | 67480.12211 | 173.2050808 |
| UIJ68397.1 | GTP_3',8-cyclase_MoaA_[Bacillus_cereus]                                    | CPTF_zcontrol   | 24947.96667 | 43211.14581 | 173.2050808 |

|            |                                                                   |                 |             |             |             |
|------------|-------------------------------------------------------------------|-----------------|-------------|-------------|-------------|
| UIJ68398.1 | molybdopterin-synthase_adenylyltransferase_MoeB_[Bacillus_cereus] | CPTF_Al         | 4953847.933 | 176808.7058 | 3.569118556 |
| UIJ68398.1 | molybdopterin-synthase_adenylyltransferase_MoeB_[Bacillus_cereus] | CPTF_Cd         | 4423949.7   | 97595.51572 | 2.206072002 |
| UIJ68398.1 | molybdopterin-synthase_adenylyltransferase_MoeB_[Bacillus_cereus] | CPTF_Co         | 4315449.667 | 355359.8728 | 8.234596629 |
| UIJ68398.1 | molybdopterin-synthase_adenylyltransferase_MoeB_[Bacillus_cereus] | CPTF_Cu         | 4697125     | 465173.2068 | 9.903360179 |
| UIJ68398.1 | molybdopterin-synthase_adenylyltransferase_MoeB_[Bacillus_cereus] | CPTF_Fe         | 4820807.4   | 157384.524  | 3.264692218 |
| UIJ68398.1 | molybdopterin-synthase_adenylyltransferase_MoeB_[Bacillus_cereus] | CPTF_Mn         | 4741819.9   | 16173.5193  | 0.341082417 |
| UIJ68398.1 | molybdopterin-synthase_adenylyltransferase_MoeB_[Bacillus_cereus] | CPTF_Ni         | 4536677.3   | 176555.3144 | 3.891731828 |
| UIJ68398.1 | molybdopterin-synthase_adenylyltransferase_MoeB_[Bacillus_cereus] | CPTF_U          | 5467856.7   | 710448.3053 | 12.99317711 |
| UIJ68398.1 | molybdopterin-synthase_adenylyltransferase_MoeB_[Bacillus_cereus] | CPTF_metals_mix | 3672717.667 | 524773.411  | 14.28842232 |
| UIJ68398.1 | molybdopterin-synthase_adenylyltransferase_MoeB_[Bacillus_cereus] | CPTF_zcontrol   | 4780263.8   | 403301.3025 | 8.43680013  |
| UIJ68399.1 | molybdopterin_molybdotransferase_MoeA_[Bacillus_cereus]           | CPTF_Al         | 332772      | 10281.7641  | 3.089732339 |
| UIJ68399.1 | molybdopterin_molybdotransferase_MoeA_[Bacillus_cereus]           | CPTF_Cd         | 301006.5667 | 277039.5678 | 92.03771562 |
| UIJ68399.1 | molybdopterin_molybdotransferase_MoeA_[Bacillus_cereus]           | CPTF_Co         | 375992.7667 | 135711.6804 | 36.09422639 |
| UIJ68399.1 | molybdopterin_molybdotransferase_MoeA_[Bacillus_cereus]           | CPTF_Cu         | 479381.7667 | 126086.2149 | 26.30183784 |
| UIJ68399.1 | molybdopterin_molybdotransferase_MoeA_[Bacillus_cereus]           | CPTF_Fe         | 173815.9667 | 188126.7898 | 108.2333191 |
| UIJ68399.1 | molybdopterin_molybdotransferase_MoeA_[Bacillus_cereus]           | CPTF_Mn         | 460760.5333 | 461025.1106 | 100.0574219 |
| UIJ68399.1 | molybdopterin_molybdotransferase_MoeA_[Bacillus_cereus]           | CPTF_Ni         | 209711.7333 | 94125.77376 | 44.88340841 |
| UIJ68399.1 | molybdopterin_molybdotransferase_MoeA_[Bacillus_cereus]           | CPTF_U          | 157774.3333 | 150058.196  | 95.10938365 |
| UIJ68399.1 | molybdopterin_molybdotransferase_MoeA_[Bacillus_cereus]           | CPTF_metals_mix | 1196648.7   | 189847.8341 | 15.86495971 |
| UIJ68399.1 | molybdopterin_molybdotransferase_MoeA_[Bacillus_cereus]           | CPTF_zcontrol   | 206118.2667 | 147607.7973 | 71.61315669 |
| UIJ68402.1 | nitrate_transporter_NarK_[Bacillus_cereus]                        | CPTF_Al         | 4286666.667 | 635164.0208 | 14.81720111 |
| UIJ68402.1 | nitrate_transporter_NarK_[Bacillus_cereus]                        | CPTF_Cd         | 2996666.667 | 106926.7662 | 3.568190196 |
| UIJ68402.1 | nitrate_transporter_NarK_[Bacillus_cereus]                        | CPTF_Co         | 3913333.333 | 205020.3242 | 5.239020209 |
| UIJ68402.1 | nitrate_transporter_NarK_[Bacillus_cereus]                        | CPTF_Cu         | 4113333.333 | 695005.9952 | 16.89641804 |
| UIJ68402.1 | nitrate_transporter_NarK_[Bacillus_cereus]                        | CPTF_Fe         | 3960000     | 600000      | 15.15151515 |
| UIJ68402.1 | nitrate_transporter_NarK_[Bacillus_cereus]                        | CPTF_Mn         | 3910000     | 832105.7625 | 21.2814773  |
| UIJ68402.1 | nitrate_transporter_NarK_[Bacillus_cereus]                        | CPTF_Ni         | 3640000     | 283548.9376 | 7.789805977 |
| UIJ68402.1 | nitrate_transporter_NarK_[Bacillus_cereus]                        | CPTF_U          | 4686666.667 | 493186.9152 | 10.52319165 |
| UIJ68402.1 | nitrate_transporter_NarK_[Bacillus_cereus]                        | CPTF_metals_mix | 2322118.667 | 104231.0317 | 4.488617797 |
| UIJ68402.1 | nitrate_transporter_NarK_[Bacillus_cereus]                        | CPTF_zcontrol   | 4903333.333 | 60277.13773 | 1.229309403 |
| UIJ68404.1 | precorrin-2_dehydrogenase_[Bacillus_cereus]                       | CPTF_Al         | 453907      | 94773.06496 | 20.8794015  |
| UIJ68404.1 | precorrin-2_dehydrogenase_[Bacillus_cereus]                       | CPTF_Cd         | 482109.6667 | 30529.35778 | 6.332450869 |
| UIJ68404.1 | precorrin-2_dehydrogenase_[Bacillus_cereus]                       | CPTF_Co         | 390675.6667 | 57592.9884  | 14.74189291 |
| UIJ68404.1 | precorrin-2_dehydrogenase_[Bacillus_cereus]                       | CPTF_Cu         | 296032      | 30300.60283 | 10.2355836  |
| UIJ68404.1 | precorrin-2_dehydrogenase_[Bacillus_cereus]                       | CPTF_Fe         | 459813      | 166248.1977 | 36.15561059 |
| UIJ68404.1 | precorrin-2_dehydrogenase_[Bacillus_cereus]                       | CPTF_Mn         | 475768.3333 | 228827.7367 | 48.09646222 |
| UIJ68404.1 | precorrin-2_dehydrogenase_[Bacillus_cereus]                       | CPTF_Ni         | 66409       | 115023.7621 | 173.2050808 |
| UIJ68404.1 | precorrin-2_dehydrogenase_[Bacillus_cereus]                       | CPTF_U          | 153123.7333 | 70898.48868 | 46.30143684 |
| UIJ68404.1 | precorrin-2_dehydrogenase_[Bacillus_cereus]                       | CPTF_metals_mix | 417267      | 29668.02857 | 7.110082649 |
| UIJ68404.1 | precorrin-2_dehydrogenase_[Bacillus_cereus]                       | CPTF_zcontrol   | 471084.3333 | 216831.0353 | 46.02807183 |
| UIJ68405.1 | sirohydrochlorin_chelatase_[Bacillus_cereus]                      | CPTF_Al         | 1306717.967 | 593448.336  | 45.41518148 |
| UIJ68405.1 | sirohydrochlorin_chelatase_[Bacillus_cereus]                      | CPTF_Cd         | 758305      | 438375.1307 | 57.80986947 |
| UIJ68405.1 | sirohydrochlorin_chelatase_[Bacillus_cereus]                      | CPTF_Co         | 1166519.1   | 276416.8797 | 23.69587259 |
| UIJ68405.1 | sirohydrochlorin_chelatase_[Bacillus_cereus]                      | CPTF_Cu         | 1701877     | 206660.7622 | 12.143108   |
| UIJ68405.1 | sirohydrochlorin_chelatase_[Bacillus_cereus]                      | CPTF_Fe         | 1143757.667 | 266958.8904 | 23.34051156 |
| UIJ68405.1 | sirohydrochlorin_chelatase_[Bacillus_cereus]                      | CPTF_Mn         | 706396      | 85869.95914 | 12.15606531 |
| UIJ68405.1 | sirohydrochlorin_chelatase_[Bacillus_cereus]                      | CPTF_Ni         | 1463080.967 | 113330.3958 | 7.746090951 |
| UIJ68405.1 | sirohydrochlorin_chelatase_[Bacillus_cereus]                      | CPTF_U          | 1100869.333 | 113947.8154 | 10.35071211 |
| UIJ68405.1 | sirohydrochlorin_chelatase_[Bacillus_cereus]                      | CPTF_metals_mix | 1066652.167 | 150731.7413 | 14.13129284 |
| UIJ68405.1 | sirohydrochlorin_chelatase_[Bacillus_cereus]                      | CPTF_zcontrol   | 1109518     | 349592.5727 | 31.50850844 |
| UIJ68407.1 | nitrite_reductase_small_subunit_NirD_[Bacillus_cereus]            | CPTF_Al         | 0           | 0           | 0           |
| UIJ68407.1 | nitrite_reductase_small_subunit_NirD_[Bacillus_cereus]            | CPTF_Cd         | 0           | 0           | 0           |
| UIJ68407.1 | nitrite_reductase_small_subunit_NirD_[Bacillus_cereus]            | CPTF_Co         | 25542.73333 | 44241.3119  | 173.2050808 |
| UIJ68407.1 | nitrite_reductase_small_subunit_NirD_[Bacillus_cereus]            | CPTF_Cu         | 0           | 0           | 0           |
| UIJ68407.1 | nitrite_reductase_small_subunit_NirD_[Bacillus_cereus]            | CPTF_Fe         | 0           | 0           | 0           |
| UIJ68407.1 | nitrite_reductase_small_subunit_NirD_[Bacillus_cereus]            | CPTF_Mn         | 0           | 0           | 0           |
| UIJ68407.1 | nitrite_reductase_small_subunit_NirD_[Bacillus_cereus]            | CPTF_Ni         | 0           | 0           | 0           |
| UIJ68407.1 | nitrite_reductase_small_subunit_NirD_[Bacillus_cereus]            | CPTF_U          | 0           | 0           | 0           |
| UIJ68407.1 | nitrite_reductase_small_subunit_NirD_[Bacillus_cereus]            | CPTF_metals_mix | 0           | 0           | 0           |
| UIJ68407.1 | nitrite_reductase_small_subunit_NirD_[Bacillus_cereus]            | CPTF_zcontrol   | 0           | 0           | 0           |
| UIJ68408.1 | NADPH-nitrite_reductase_large_subunit_[Bacillus_cereus]           | CPTF_Al         | 9660387.5   | 1133375.368 | 11.73219364 |

|            |                                                                               |                 |             |             |             |
|------------|-------------------------------------------------------------------------------|-----------------|-------------|-------------|-------------|
| UIJ68408.1 | NADPH-nitrite_reductase_large_subunit_[Bacillus_cereus]                       | CPTF_Cd         | 9198683.927 | 1282311.503 | 13.94016267 |
| UIJ68408.1 | NADPH-nitrite_reductase_large_subunit_[Bacillus_cereus]                       | CPTF_Co         | 10796758.9  | 994918.0287 | 9.214969399 |
| UIJ68408.1 | NADPH-nitrite_reductase_large_subunit_[Bacillus_cereus]                       | CPTF_Cu         | 9971700.1   | 774353.2078 | 7.765508389 |
| UIJ68408.1 | NADPH-nitrite_reductase_large_subunit_[Bacillus_cereus]                       | CPTF_Fe         | 7509469.333 | 1915538.381 | 25.50830553 |
| UIJ68408.1 | NADPH-nitrite_reductase_large_subunit_[Bacillus_cereus]                       | CPTF_Mn         | 8634602.367 | 2421408.549 | 28.04308116 |
| UIJ68408.1 | NADPH-nitrite_reductase_large_subunit_[Bacillus_cereus]                       | CPTF_Ni         | 9648376.667 | 1681352.879 | 17.42627736 |
| UIJ68408.1 | NADPH-nitrite_reductase_large_subunit_[Bacillus_cereus]                       | CPTF_U          | 10937328.2  | 1505880.345 | 13.76826513 |
| UIJ68408.1 | NADPH-nitrite_reductase_large_subunit_[Bacillus_cereus]                       | CPTF_metals_mix | 13384435.83 | 481503.597  | 3.597488926 |
| UIJ68408.1 | NADPH-nitrite_reductase_large_subunit_[Bacillus_cereus]                       | CPTF_zcontrol   | 13263567.93 | 1247143.616 | 9.40277625  |
| UIJ68409.1 | iron-sulfur_cluster_repair_di-iron_protein_[Bacillus_cereus]                  | CPTF_Al         | 376102.1    | 136613.4128 | 36.3234911  |
| UIJ68409.1 | iron-sulfur_cluster_repair_di-iron_protein_[Bacillus_cereus]                  | CPTF_Cd         | 506926.6667 | 117423.4177 | 23.16378787 |
| UIJ68409.1 | iron-sulfur_cluster_repair_di-iron_protein_[Bacillus_cereus]                  | CPTF_Co         | 285684.6333 | 21064.45329 | 7.37332388  |
| UIJ68409.1 | iron-sulfur_cluster_repair_di-iron_protein_[Bacillus_cereus]                  | CPTF_Cu         | 705761.6667 | 372365.3297 | 52.76077567 |
| UIJ68409.1 | iron-sulfur_cluster_repair_di-iron_protein_[Bacillus_cereus]                  | CPTF_Fe         | 398294.6667 | 30789.46807 | 7.730323967 |
| UIJ68409.1 | iron-sulfur_cluster_repair_di-iron_protein_[Bacillus_cereus]                  | CPTF_Mn         | 282924.8    | 80037.33868 | 28.28926226 |
| UIJ68409.1 | iron-sulfur_cluster_repair_di-iron_protein_[Bacillus_cereus]                  | CPTF_Ni         | 358491.1667 | 105381.1887 | 29.39575601 |
| UIJ68409.1 | iron-sulfur_cluster_repair_di-iron_protein_[Bacillus_cereus]                  | CPTF_U          | 331625.9333 | 94544.53678 | 28.50939184 |
| UIJ68409.1 | iron-sulfur_cluster_repair_di-iron_protein_[Bacillus_cereus]                  | CPTF_metals_mix | 80872.23333 | 87095.67289 | 107.6953972 |
| UIJ68409.1 | iron-sulfur_cluster_repair_di-iron_protein_[Bacillus_cereus]                  | CPTF_zcontrol   | 218755      | 72106.37462 | 32.96216069 |
| UIJ68412.1 | arylamine_N-acetyltransferase_[Bacillus_cereus]                               | CPTF_Al         | 911855.3333 | 131795.8593 | 14.45359308 |
| UIJ68412.1 | arylamine_N-acetyltransferase_[Bacillus_cereus]                               | CPTF_Cd         | 934922.3333 | 145098.2864 | 15.51982248 |
| UIJ68412.1 | arylamine_N-acetyltransferase_[Bacillus_cereus]                               | CPTF_Co         | 737881.3333 | 106748.4964 | 14.46689212 |
| UIJ68412.1 | arylamine_N-acetyltransferase_[Bacillus_cereus]                               | CPTF_Cu         | 750839.6667 | 56837.00155 | 7.569792071 |
| UIJ68412.1 | arylamine_N-acetyltransferase_[Bacillus_cereus]                               | CPTF_Fe         | 838396      | 167248.8734 | 19.94867263 |
| UIJ68412.1 | arylamine_N-acetyltransferase_[Bacillus_cereus]                               | CPTF_Mn         | 746479.3333 | 204706.5244 | 27.4229326  |
| UIJ68412.1 | arylamine_N-acetyltransferase_[Bacillus_cereus]                               | CPTF_Ni         | 875994.6667 | 59907.10085 | 6.838751779 |
| UIJ68412.1 | arylamine_N-acetyltransferase_[Bacillus_cereus]                               | CPTF_U          | 1086367.333 | 277044.4178 | 25.50190983 |
| UIJ68412.1 | arylamine_N-acetyltransferase_[Bacillus_cereus]                               | CPTF_metals_mix | 282378.3333 | 37864.13198 | 13.40900753 |
| UIJ68412.1 | arylamine_N-acetyltransferase_[Bacillus_cereus]                               | CPTF_zcontrol   | 859800      | 139019.8588 | 16.16886006 |
| UIJ68414.1 | stage_V_sporulation_protein_S_[Bacillus_cereus]                               | CPTF_Al         | 661105      | 312515.2626 | 47.27165315 |
| UIJ68414.1 | stage_V_sporulation_protein_S_[Bacillus_cereus]                               | CPTF_Cd         | 790758.3333 | 188444.9166 | 23.83091124 |
| UIJ68414.1 | stage_V_sporulation_protein_S_[Bacillus_cereus]                               | CPTF_Co         | 589890      | 25120.82899 | 4.258561594 |
| UIJ68414.1 | stage_V_sporulation_protein_S_[Bacillus_cereus]                               | CPTF_Cu         | 640201.6667 | 97376.42197 | 15.21027311 |
| UIJ68414.1 | stage_V_sporulation_protein_S_[Bacillus_cereus]                               | CPTF_Fe         | 679788.2667 | 114510.2986 | 16.84499486 |
| UIJ68414.1 | stage_V_sporulation_protein_S_[Bacillus_cereus]                               | CPTF_Mn         | 602505.6667 | 24509.50208 | 4.067928891 |
| UIJ68414.1 | stage_V_sporulation_protein_S_[Bacillus_cereus]                               | CPTF_Ni         | 745575.6667 | 72556.06657 | 9.731549703 |
| UIJ68414.1 | stage_V_sporulation_protein_S_[Bacillus_cereus]                               | CPTF_U          | 384485      | 217181.9992 | 56.48646871 |
| UIJ68414.1 | stage_V_sporulation_protein_S_[Bacillus_cereus]                               | CPTF_metals_mix | 390013.6667 | 103256.5096 | 26.47510033 |
| UIJ68414.1 | stage_V_sporulation_protein_S_[Bacillus_cereus]                               | CPTF_zcontrol   | 487851.3333 | 27352.80171 | 5.606790397 |
| UIJ68423.1 | ABC-F_family_ATP-binding_cassette_domain-containing_protein_[Bacillus_cereus] | CPTF_Al         | 225205.2667 | 52591.91287 | 23.35287875 |
| UIJ68423.1 | ABC-F_family_ATP-binding_cassette_domain-containing_protein_[Bacillus_cereus] | CPTF_Cd         | 384397.8667 | 100453.9834 | 26.13281502 |
| UIJ68423.1 | ABC-F_family_ATP-binding_cassette_domain-containing_protein_[Bacillus_cereus] | CPTF_Co         | 413072.4    | 62313.45423 | 15.08535894 |
| UIJ68423.1 | ABC-F_family_ATP-binding_cassette_domain-containing_protein_[Bacillus_cereus] | CPTF_Cu         | 421735.3667 | 86769.17602 | 20.57431813 |
| UIJ68423.1 | ABC-F_family_ATP-binding_cassette_domain-containing_protein_[Bacillus_cereus] | CPTF_Fe         | 233154.1333 | 26592.7894  | 11.4056693  |
| UIJ68423.1 | ABC-F_family_ATP-binding_cassette_domain-containing_protein_[Bacillus_cereus] | CPTF_Mn         | 168475.3    | 64385.64679 | 38.21666843 |
| UIJ68423.1 | ABC-F_family_ATP-binding_cassette_domain-containing_protein_[Bacillus_cereus] | CPTF_Ni         | 453822.2667 | 222771.1392 | 49.08774989 |
| UIJ68423.1 | ABC-F_family_ATP-binding_cassette_domain-containing_protein_[Bacillus_cereus] | CPTF_U          | 443696      | 398639.1629 | 89.84511082 |
| UIJ68423.1 | ABC-F_family_ATP-binding_cassette_domain-containing_protein_[Bacillus_cereus] | CPTF_metals_mix | 276466.5667 | 49825.50349 | 18.0225278  |
| UIJ68423.1 | ABC-F_family_ATP-binding_cassette_domain-containing_protein_[Bacillus_cereus] | CPTF_zcontrol   | 202423.4667 | 96068.94563 | 47.45939155 |
| UIJ68425.1 | DUF4318_domain-containing_protein_[Bacillus_cereus]                           | CPTF_Al         | 0           | 0           | 0           |
| UIJ68425.1 | DUF4318_domain-containing_protein_[Bacillus_cereus]                           | CPTF_Cd         | 0           | 0           | 0           |
| UIJ68425.1 | DUF4318_domain-containing_protein_[Bacillus_cereus]                           | CPTF_Co         | 0           | 0           | 0           |
| UIJ68425.1 | DUF4318_domain-containing_protein_[Bacillus_cereus]                           | CPTF_Cu         | 0           | 0           | 0           |
| UIJ68425.1 | DUF4318_domain-containing_protein_[Bacillus_cereus]                           | CPTF_Fe         | 0           | 0           | 0           |
| UIJ68425.1 | DUF4318_domain-containing_protein_[Bacillus_cereus]                           | CPTF_Mn         | 0           | 0           | 0           |
| UIJ68425.1 | DUF4318_domain-containing_protein_[Bacillus_cereus]                           | CPTF_Ni         | 0           | 0           | 0           |
| UIJ68425.1 | DUF4318_domain-containing_protein_[Bacillus_cereus]                           | CPTF_U          | 0           | 0           | 0           |
| UIJ68425.1 | DUF4318_domain-containing_protein_[Bacillus_cereus]                           | CPTF_metals_mix | 13663.26667 | 23665.47206 | 173.2050808 |
| UIJ68425.1 | DUF4318_domain-containing_protein_[Bacillus_cereus]                           | CPTF_zcontrol   | 0           | 0           | 0           |
| UIJ68429.1 | BrxA/BrxB_family_bacilliredoxin_[Bacillus_cereus]                             | CPTF_Al         | 1800133.667 | 293102.0298 | 16.28223699 |
| UIJ68429.1 | BrxA/BrxB_family_bacilliredoxin_[Bacillus_cereus]                             | CPTF_Cd         | 2089886.167 | 71506.44586 | 3.421547403 |

|            |                                                   |                 |             |             |             |
|------------|---------------------------------------------------|-----------------|-------------|-------------|-------------|
| UIJ68429.1 | BrxA/BrxB_family_bacilliredoxin_[Bacillus_cereus] | CPTF_Co         | 1906292.767 | 391074.3357 | 20.51491474 |
| UIJ68429.1 | BrxA/BrxB_family_bacilliredoxin_[Bacillus_cereus] | CPTF_Cu         | 1686917.233 | 42586.16834 | 2.524496608 |
| UIJ68429.1 | BrxA/BrxB_family_bacilliredoxin_[Bacillus_cereus] | CPTF_Fe         | 1846405.967 | 349846.4288 | 18.94742733 |
| UIJ68429.1 | BrxA/BrxB_family_bacilliredoxin_[Bacillus_cereus] | CPTF_Mn         | 2149766.1   | 542166.2757 | 25.21977976 |
| UIJ68429.1 | BrxA/BrxB_family_bacilliredoxin_[Bacillus_cereus] | CPTF_Ni         | 1391762.133 | 505562.0243 | 36.32531826 |
| UIJ68429.1 | BrxA/BrxB_family_bacilliredoxin_[Bacillus_cereus] | CPTF_U          | 1664031     | 495358.9291 | 29.76861183 |
| UIJ68429.1 | BrxA/BrxB_family_bacilliredoxin_[Bacillus_cereus] | CPTF_metals_mix | 3283733.433 | 228947.6017 | 6.972173789 |
| UIJ68429.1 | BrxA/BrxB_family_bacilliredoxin_[Bacillus_cereus] | CPTF_zcontrol   | 1755114.267 | 257239.3882 | 14.65656072 |
| UIJ68431.1 | arginine--tRNA_ligase_[Bacillus_cereus]           | CPTF_Al         | 410450.3667 | 315943.9349 | 76.97494277 |
| UIJ68431.1 | arginine--tRNA_ligase_[Bacillus_cereus]           | CPTF_Cd         | 372167.7    | 175191.318  | 47.0732194  |
| UIJ68431.1 | arginine--tRNA_ligase_[Bacillus_cereus]           | CPTF_Co         | 277271.1667 | 210604.5466 | 75.95616562 |
| UIJ68431.1 | arginine--tRNA_ligase_[Bacillus_cereus]           | CPTF_Cu         | 67096.8     | 15130.89289 | 22.5508413  |
| UIJ68431.1 | arginine--tRNA_ligase_[Bacillus_cereus]           | CPTF_Fe         | 345480.5333 | 374880.3617 | 108.5098365 |
| UIJ68431.1 | arginine--tRNA_ligase_[Bacillus_cereus]           | CPTF_Mn         | 490675.9333 | 391152.7943 | 79.71713462 |
| UIJ68431.1 | arginine--tRNA_ligase_[Bacillus_cereus]           | CPTF_Ni         | 471561.8    | 540587.2894 | 114.6376338 |
| UIJ68431.1 | arginine--tRNA_ligase_[Bacillus_cereus]           | CPTF_U          | 406432.3    | 636172.3107 | 156.5260218 |
| UIJ68431.1 | arginine--tRNA_ligase_[Bacillus_cereus]           | CPTF_metals_mix | 1424862.1   | 249074.8059 | 17.48062538 |
| UIJ68431.1 | arginine--tRNA_ligase_[Bacillus_cereus]           | CPTF_zcontrol   | 600309.2    | 295103.5669 | 49.15859475 |
| UIJ68435.1 | isoleucine--tRNA_ligase_[Bacillus_cereus]         | CPTF_Al         | 133878.6667 | 92407.89374 | 69.02361372 |
| UIJ68435.1 | isoleucine--tRNA_ligase_[Bacillus_cereus]         | CPTF_Cd         | 185891.3667 | 110013.3196 | 59.181511   |
| UIJ68435.1 | isoleucine--tRNA_ligase_[Bacillus_cereus]         | CPTF_Co         | 335763.8    | 97772.98846 | 29.11957408 |
| UIJ68435.1 | isoleucine--tRNA_ligase_[Bacillus_cereus]         | CPTF_Cu         | 161057.3    | 141137.8627 | 87.63208047 |
| UIJ68435.1 | isoleucine--tRNA_ligase_[Bacillus_cereus]         | CPTF_Fe         | 239496.1667 | 109958.8514 | 45.91257259 |
| UIJ68435.1 | isoleucine--tRNA_ligase_[Bacillus_cereus]         | CPTF_Mn         | 159635.3333 | 90886.8755  | 56.9340594  |
| UIJ68435.1 | isoleucine--tRNA_ligase_[Bacillus_cereus]         | CPTF_Ni         | 88846.4     | 73400.41683 | 82.61495888 |
| UIJ68435.1 | isoleucine--tRNA_ligase_[Bacillus_cereus]         | CPTF_U          | 149541.6667 | 133179.0636 | 89.05816455 |
| UIJ68435.1 | isoleucine--tRNA_ligase_[Bacillus_cereus]         | CPTF_metals_mix | 247929.7    | 55951.26628 | 22.56739159 |
| UIJ68435.1 | isoleucine--tRNA_ligase_[Bacillus_cereus]         | CPTF_zcontrol   | 149752.3333 | 22120.50416 | 14.77139198 |
| UIJ68437.1 | aspartate--tRNA(Asn)_ligase_[Bacillus_cereus]     | CPTF_Al         | 26540.53333 | 45969.55219 | 173.2050808 |
| UIJ68437.1 | aspartate--tRNA(Asn)_ligase_[Bacillus_cereus]     | CPTF_Cd         | 65054.76667 | 57486.61246 | 88.36648781 |
| UIJ68437.1 | aspartate--tRNA(Asn)_ligase_[Bacillus_cereus]     | CPTF_Co         | 150221.9333 | 29328.71034 | 19.52358733 |
| UIJ68437.1 | aspartate--tRNA(Asn)_ligase_[Bacillus_cereus]     | CPTF_Cu         | 15794.56667 | 27356.99195 | 173.2050808 |
| UIJ68437.1 | aspartate--tRNA(Asn)_ligase_[Bacillus_cereus]     | CPTF_Fe         | 38724.46667 | 38756.69009 | 100.083212  |
| UIJ68437.1 | aspartate--tRNA(Asn)_ligase_[Bacillus_cereus]     | CPTF_Mn         | 22567.1     | 39087.36378 | 173.2050808 |
| UIJ68437.1 | aspartate--tRNA(Asn)_ligase_[Bacillus_cereus]     | CPTF_Ni         | 103680      | 90050.80691 | 86.85455913 |
| UIJ68437.1 | aspartate--tRNA(Asn)_ligase_[Bacillus_cereus]     | CPTF_U          | 35997.33333 | 62349.21027 | 173.2050808 |
| UIJ68437.1 | aspartate--tRNA(Asn)_ligase_[Bacillus_cereus]     | CPTF_metals_mix | 43401.93333 | 37592.62681 | 86.61509736 |
| UIJ68437.1 | aspartate--tRNA(Asn)_ligase_[Bacillus_cereus]     | CPTF_zcontrol   | 0           | 0           | 0           |
| UIJ68448.1 | HAD_family_hydrolase_[Bacillus_cereus]            | CPTF_Al         | 62737.36667 | 54348.53361 | 86.62864971 |
| UIJ68448.1 | HAD_family_hydrolase_[Bacillus_cereus]            | CPTF_Cd         | 75252.46667 | 45130.30805 | 59.97186544 |
| UIJ68448.1 | HAD_family_hydrolase_[Bacillus_cereus]            | CPTF_Co         | 66453.76667 | 57812.04246 | 86.99588504 |
| UIJ68448.1 | HAD_family_hydrolase_[Bacillus_cereus]            | CPTF_Cu         | 39756       | 68859.41191 | 173.2050808 |
| UIJ68448.1 | HAD_family_hydrolase_[Bacillus_cereus]            | CPTF_Fe         | 69353.3     | 66601.06188 | 96.03156862 |
| UIJ68448.1 | HAD_family_hydrolase_[Bacillus_cereus]            | CPTF_Mn         | 44272.53333 | 23828.40566 | 53.8220966  |
| UIJ68448.1 | HAD_family_hydrolase_[Bacillus_cereus]            | CPTF_Ni         | 109778.3333 | 95109.14337 | 86.63744519 |
| UIJ68448.1 | HAD_family_hydrolase_[Bacillus_cereus]            | CPTF_U          | 72991.73333 | 11984.68519 | 16.41923631 |
| UIJ68448.1 | HAD_family_hydrolase_[Bacillus_cereus]            | CPTF_metals_mix | 228531.4333 | 82084.06841 | 35.91806484 |
| UIJ68448.1 | HAD_family_hydrolase_[Bacillus_cereus]            | CPTF_zcontrol   | 20504.93333 | 35515.58634 | 173.2050808 |
| UIJ68464.1 | serine_hydrolase_[Bacillus_cereus]                | CPTF_Al         | 6102185.667 | 330872.1209 | 5.422190326 |
| UIJ68464.1 | serine_hydrolase_[Bacillus_cereus]                | CPTF_Cd         | 6112415     | 635816.3867 | 10.40204873 |
| UIJ68464.1 | serine_hydrolase_[Bacillus_cereus]                | CPTF_Co         | 5331387.333 | 675806.311  | 12.67599348 |
| UIJ68464.1 | serine_hydrolase_[Bacillus_cereus]                | CPTF_Cu         | 4919200.2   | 297308.7431 | 6.043843125 |
| UIJ68464.1 | serine_hydrolase_[Bacillus_cereus]                | CPTF_Fe         | 5981813     | 323999.8207 | 5.416415068 |
| UIJ68464.1 | serine_hydrolase_[Bacillus_cereus]                | CPTF_Mn         | 5566665.5   | 577808.9419 | 10.37980353 |
| UIJ68464.1 | serine_hydrolase_[Bacillus_cereus]                | CPTF_Ni         | 5478949.333 | 354245.6561 | 6.465576419 |
| UIJ68464.1 | serine_hydrolase_[Bacillus_cereus]                | CPTF_U          | 4439006.433 | 475628.3566 | 10.71474808 |
| UIJ68464.1 | serine_hydrolase_[Bacillus_cereus]                | CPTF_metals_mix | 5434258     | 261910.617  | 4.819620581 |
| UIJ68464.1 | serine_hydrolase_[Bacillus_cereus]                | CPTF_zcontrol   | 5262844.667 | 206400.9865 | 3.921852146 |
| UIJ68465.1 | thymidylate_synthase_[Bacillus_cereus]            | CPTF_Al         | 85509.63333 | 53047.8681  | 62.0373004  |
| UIJ68465.1 | thymidylate_synthase_[Bacillus_cereus]            | CPTF_Cd         | 214584.2667 | 139019.3623 | 64.78544047 |
| UIJ68465.1 | thymidylate_synthase_[Bacillus_cereus]            | CPTF_Co         | 113487.3    | 6673.744563 | 5.880609163 |

|            |                                                                      |                 |             |             |             |
|------------|----------------------------------------------------------------------|-----------------|-------------|-------------|-------------|
| UIJ68465.1 | thymidylate_synthase_[Bacillus_cereus]                               | CPTF_Cu         | 177142.1333 | 65444.92541 | 36.94486692 |
| UIJ68465.1 | thymidylate_synthase_[Bacillus_cereus]                               | CPTF_Fe         | 80876.16667 | 61537.74004 | 76.0888437  |
| UIJ68465.1 | thymidylate_synthase_[Bacillus_cereus]                               | CPTF_Mn         | 84113.43333 | 11836.97616 | 14.07263464 |
| UIJ68465.1 | thymidylate_synthase_[Bacillus_cereus]                               | CPTF_Ni         | 591534.8    | 806958.37   | 136.417734  |
| UIJ68465.1 | thymidylate_synthase_[Bacillus_cereus]                               | CPTF_U          | 491288.6    | 769723.6955 | 156.6744466 |
| UIJ68465.1 | thymidylate_synthase_[Bacillus_cereus]                               | CPTF_metals_mix | 579237.6333 | 34940.19229 | 6.032099828 |
| UIJ68465.1 | thymidylate_synthase_[Bacillus_cereus]                               | CPTF_zcontrol   | 108592.6333 | 22179.34443 | 20.42435454 |
| UIJ68467.1 | penicillin-binding_protein_3_[Bacillus_cereus]                       | CPTF_Al         | 642800.5667 | 112517.2967 | 17.5042311  |
| UIJ68467.1 | penicillin-binding_protein_3_[Bacillus_cereus]                       | CPTF_Cd         | 1056493.333 | 398678.4924 | 37.73601591 |
| UIJ68467.1 | penicillin-binding_protein_3_[Bacillus_cereus]                       | CPTF_Co         | 767252.3667 | 99134.81925 | 12.9207577  |
| UIJ68467.1 | penicillin-binding_protein_3_[Bacillus_cereus]                       | CPTF_Cu         | 789389.9    | 88442.14719 | 11.20386101 |
| UIJ68467.1 | penicillin-binding_protein_3_[Bacillus_cereus]                       | CPTF_Fe         | 696359.3333 | 256253.5821 | 36.79904467 |
| UIJ68467.1 | penicillin-binding_protein_3_[Bacillus_cereus]                       | CPTF_Mn         | 863821.6667 | 434311.0295 | 50.27785783 |
| UIJ68467.1 | penicillin-binding_protein_3_[Bacillus_cereus]                       | CPTF_Ni         | 625108.0333 | 303069.2978 | 48.48270725 |
| UIJ68467.1 | penicillin-binding_protein_3_[Bacillus_cereus]                       | CPTF_U          | 371624.0667 | 9976.41523  | 2.684544981 |
| UIJ68467.1 | penicillin-binding_protein_3_[Bacillus_cereus]                       | CPTF_metals_mix | 1573396.2   | 234862.4647 | 14.92710257 |
| UIJ68467.1 | penicillin-binding_protein_3_[Bacillus_cereus]                       | CPTF_zcontrol   | 528812.1    | 120818.8481 | 22.84721702 |
| UIJ68468.1 | FMN-dependent_NADH-azoreductase_[Bacillus_cereus]                    | CPTF_Al         | 29254.96667 | 50671.08864 | 173.2050808 |
| UIJ68468.1 | FMN-dependent_NADH-azoreductase_[Bacillus_cereus]                    | CPTF_Cd         | 36879.1     | 34479.35886 | 93.49295091 |
| UIJ68468.1 | FMN-dependent_NADH-azoreductase_[Bacillus_cereus]                    | CPTF_Co         | 0           | 0           | 0           |
| UIJ68468.1 | FMN-dependent_NADH-azoreductase_[Bacillus_cereus]                    | CPTF_Cu         | 23057.9     | 39937.45432 | 173.2050808 |
| UIJ68468.1 | FMN-dependent_NADH-azoreductase_[Bacillus_cereus]                    | CPTF_Fe         | 35570.33333 | 61609.62458 | 173.2050808 |
| UIJ68468.1 | FMN-dependent_NADH-azoreductase_[Bacillus_cereus]                    | CPTF_Mn         | 0           | 0           | 0           |
| UIJ68468.1 | FMN-dependent_NADH-azoreductase_[Bacillus_cereus]                    | CPTF_Ni         | 0           | 0           | 0           |
| UIJ68468.1 | FMN-dependent_NADH-azoreductase_[Bacillus_cereus]                    | CPTF_U          | 0           | 0           | 0           |
| UIJ68468.1 | FMN-dependent_NADH-azoreductase_[Bacillus_cereus]                    | CPTF_metals_mix | 0           | 0           | 0           |
| UIJ68468.1 | FMN-dependent_NADH-azoreductase_[Bacillus_cereus]                    | CPTF_zcontrol   | 0           | 0           | 0           |
| UIJ68471.1 | twin-arginine_translocase_TatA/TatE_family_subunit_[Bacillus_cereus] | CPTF_Al         | 89131.66667 | 44284.08833 | 49.68390022 |
| UIJ68471.1 | twin-arginine_translocase_TatA/TatE_family_subunit_[Bacillus_cereus] | CPTF_Cd         | 105621.6    | 48675.97094 | 46.08524293 |
| UIJ68471.1 | twin-arginine_translocase_TatA/TatE_family_subunit_[Bacillus_cereus] | CPTF_Co         | 102270.3    | 28475.36075 | 27.84323577 |
| UIJ68471.1 | twin-arginine_translocase_TatA/TatE_family_subunit_[Bacillus_cereus] | CPTF_Cu         | 16884.53333 | 29244.8696  | 173.2050808 |
| UIJ68471.1 | twin-arginine_translocase_TatA/TatE_family_subunit_[Bacillus_cereus] | CPTF_Fe         | 76865.8     | 14600.79369 | 18.9951756  |
| UIJ68471.1 | twin-arginine_translocase_TatA/TatE_family_subunit_[Bacillus_cereus] | CPTF_Mn         | 172202.7667 | 75758.89183 | 43.99400387 |
| UIJ68471.1 | twin-arginine_translocase_TatA/TatE_family_subunit_[Bacillus_cereus] | CPTF_Ni         | 22560.76667 | 39076.39412 | 173.2050808 |
| UIJ68471.1 | twin-arginine_translocase_TatA/TatE_family_subunit_[Bacillus_cereus] | CPTF_U          | 191155.3333 | 28519.01549 | 14.91928841 |
| UIJ68471.1 | twin-arginine_translocase_TatA/TatE_family_subunit_[Bacillus_cereus] | CPTF_metals_mix | 0           | 0           | 0           |
| UIJ68471.1 | twin-arginine_translocase_TatA/TatE_family_subunit_[Bacillus_cereus] | CPTF_zcontrol   | 136927.6    | 71435.19594 | 52.17004895 |
| UIJ68474.1 | DegV_family_protein_[Bacillus_cereus]                                | CPTF_Al         | 0           | 0           | 0           |
| UIJ68474.1 | DegV_family_protein_[Bacillus_cereus]                                | CPTF_Cd         | 284947.3333 | 250219.6353 | 87.81259062 |
| UIJ68474.1 | DegV_family_protein_[Bacillus_cereus]                                | CPTF_Co         | 0           | 0           | 0           |
| UIJ68474.1 | DegV_family_protein_[Bacillus_cereus]                                | CPTF_Cu         | 0           | 0           | 0           |
| UIJ68474.1 | DegV_family_protein_[Bacillus_cereus]                                | CPTF_Fe         | 114336.3333 | 198036.3385 | 173.2050808 |
| UIJ68474.1 | DegV_family_protein_[Bacillus_cereus]                                | CPTF_Mn         | 85001.66667 | 147227.2054 | 173.2050808 |
| UIJ68474.1 | DegV_family_protein_[Bacillus_cereus]                                | CPTF_Ni         | 0           | 0           | 0           |
| UIJ68474.1 | DegV_family_protein_[Bacillus_cereus]                                | CPTF_U          | 0           | 0           | 0           |
| UIJ68474.1 | DegV_family_protein_[Bacillus_cereus]                                | CPTF_metals_mix | 494161.4333 | 136011.9512 | 27.52378919 |
| UIJ68474.1 | DegV_family_protein_[Bacillus_cereus]                                | CPTF_zcontrol   | 0           | 0           | 0           |
| UIJ68476.1 | SCO_family_protein_[Bacillus_cereus]                                 | CPTF_Al         | 637697.6667 | 27230.93671 | 4.270195445 |
| UIJ68476.1 | SCO_family_protein_[Bacillus_cereus]                                 | CPTF_Cd         | 650114.3333 | 23802.1563  | 3.661226199 |
| UIJ68476.1 | SCO_family_protein_[Bacillus_cereus]                                 | CPTF_Co         | 536177      | 82504.68064 | 15.38758295 |
| UIJ68476.1 | SCO_family_protein_[Bacillus_cereus]                                 | CPTF_Cu         | 473531      | 41457.23943 | 8.754915608 |
| UIJ68476.1 | SCO_family_protein_[Bacillus_cereus]                                 | CPTF_Fe         | 665059      | 14223.72514 | 2.138716286 |
| UIJ68476.1 | SCO_family_protein_[Bacillus_cereus]                                 | CPTF_Mn         | 496558      | 74659.96209 | 15.03549678 |
| UIJ68476.1 | SCO_family_protein_[Bacillus_cereus]                                 | CPTF_Ni         | 587687.3333 | 26495.55203 | 4.50844361  |
| UIJ68476.1 | SCO_family_protein_[Bacillus_cereus]                                 | CPTF_U          | 645430.3333 | 78609.28202 | 12.17935972 |
| UIJ68476.1 | SCO_family_protein_[Bacillus_cereus]                                 | CPTF_metals_mix | 260387      | 18657.89846 | 7.165449297 |
| UIJ68476.1 | SCO_family_protein_[Bacillus_cereus]                                 | CPTF_zcontrol   | 638912.6667 | 78797.01996 | 12.3329876  |
| UIJ68478.1 | asparagine_synthase_(glutamine-hydrolyzing)_[Bacillus_cereus]        | CPTF_Al         | 1983958.667 | 685104.2796 | 34.53218512 |
| UIJ68478.1 | asparagine_synthase_(glutamine-hydrolyzing)_[Bacillus_cereus]        | CPTF_Cd         | 2458253.9   | 315364.8224 | 12.82881408 |
| UIJ68478.1 | asparagine_synthase_(glutamine-hydrolyzing)_[Bacillus_cereus]        | CPTF_Co         | 2311963.267 | 173473.8416 | 7.503313054 |
| UIJ68478.1 | asparagine_synthase_(glutamine-hydrolyzing)_[Bacillus_cereus]        | CPTF_Cu         | 2679360.233 | 315258.03   | 11.76616814 |

|            |                                                                              |                 |             |             |             |
|------------|------------------------------------------------------------------------------|-----------------|-------------|-------------|-------------|
| UIJ68478.1 | asparagine_synthase_(glutamine-hydrolyzing)_[Bacillus_cereus]                | CPTF_Fe         | 2159810.033 | 557171.7015 | 25.79725499 |
| UIJ68478.1 | asparagine_synthase_(glutamine-hydrolyzing)_[Bacillus_cereus]                | CPTF_Mn         | 1762031.8   | 547221.9035 | 31.05630122 |
| UIJ68478.1 | asparagine_synthase_(glutamine-hydrolyzing)_[Bacillus_cereus]                | CPTF_Ni         | 2402363.633 | 342484.9459 | 14.25616594 |
| UIJ68478.1 | asparagine_synthase_(glutamine-hydrolyzing)_[Bacillus_cereus]                | CPTF_U          | 2052345.333 | 986372.3192 | 48.06073828 |
| UIJ68478.1 | asparagine_synthase_(glutamine-hydrolyzing)_[Bacillus_cereus]                | CPTF_metals_mix | 2316924.167 | 604414.8588 | 26.08695043 |
| UIJ68478.1 | asparagine_synthase_(glutamine-hydrolyzing)_[Bacillus_cereus]                | CPTF_zcontrol   | 1501544.3   | 169296.4734 | 11.27482376 |
| UIJ68481.1 | iron-siderophore_ABC_transporter_substrate-binding_protein_[Bacillus_cereus] | CPTF_Al         | 0           | 0           | 0           |
| UIJ68481.1 | iron-siderophore_ABC_transporter_substrate-binding_protein_[Bacillus_cereus] | CPTF_Cd         | 0           | 0           | 0           |
| UIJ68481.1 | iron-siderophore_ABC_transporter_substrate-binding_protein_[Bacillus_cereus] | CPTF_Co         | 0           | 0           | 0           |
| UIJ68481.1 | iron-siderophore_ABC_transporter_substrate-binding_protein_[Bacillus_cereus] | CPTF_Cu         | 0           | 0           | 0           |
| UIJ68481.1 | iron-siderophore_ABC_transporter_substrate-binding_protein_[Bacillus_cereus] | CPTF_Fe         | 0           | 0           | 0           |
| UIJ68481.1 | iron-siderophore_ABC_transporter_substrate-binding_protein_[Bacillus_cereus] | CPTF_Mn         | 0           | 0           | 0           |
| UIJ68481.1 | iron-siderophore_ABC_transporter_substrate-binding_protein_[Bacillus_cereus] | CPTF_Ni         | 0           | 0           | 0           |
| UIJ68481.1 | iron-siderophore_ABC_transporter_substrate-binding_protein_[Bacillus_cereus] | CPTF_U          | 0           | 0           | 0           |
| UIJ68481.1 | iron-siderophore_ABC_transporter_substrate-binding_protein_[Bacillus_cereus] | CPTF_metals_mix | 26889       | 31802.00242 | 118.2714211 |
| UIJ68481.1 | iron-siderophore_ABC_transporter_substrate-binding_protein_[Bacillus_cereus] | CPTF_zcontrol   | 0           | 0           | 0           |
| UIJ68482.1 | D-amino-acid_transaminase_[Bacillus_cereus]                                  | CPTF_Al         | 747284.0333 | 138458.3163 | 18.52820482 |
| UIJ68482.1 | D-amino-acid_transaminase_[Bacillus_cereus]                                  | CPTF_Cd         | 579254.4667 | 14570.01369 | 2.515304505 |
| UIJ68482.1 | D-amino-acid_transaminase_[Bacillus_cereus]                                  | CPTF_Co         | 580507.3    | 154347.7863 | 26.58843159 |
| UIJ68482.1 | D-amino-acid_transaminase_[Bacillus_cereus]                                  | CPTF_Cu         | 573154.6    | 93917.14137 | 16.38600499 |
| UIJ68482.1 | D-amino-acid_transaminase_[Bacillus_cereus]                                  | CPTF_Fe         | 649271.3667 | 107909.4743 | 16.62008827 |
| UIJ68482.1 | D-amino-acid_transaminase_[Bacillus_cereus]                                  | CPTF_Mn         | 473958.6333 | 110215.292  | 23.25420075 |
| UIJ68482.1 | D-amino-acid_transaminase_[Bacillus_cereus]                                  | CPTF_Ni         | 623249.8667 | 55146.91102 | 8.848282842 |
| UIJ68482.1 | D-amino-acid_transaminase_[Bacillus_cereus]                                  | CPTF_U          | 352299      | 168618.6058 | 47.86235721 |
| UIJ68482.1 | D-amino-acid_transaminase_[Bacillus_cereus]                                  | CPTF_metals_mix | 286441.3333 | 102950.7182 | 35.94129275 |
| UIJ68482.1 | D-amino-acid_transaminase_[Bacillus_cereus]                                  | CPTF_zcontrol   | 450352.6667 | 25029.38686 | 5.557730354 |
| UIJ68483.1 | nitroreductase_family_protein_[Bacillus_cereus]                              | CPTF_Al         | 0           | 0           | 0           |
| UIJ68483.1 | nitroreductase_family_protein_[Bacillus_cereus]                              | CPTF_Cd         | 0           | 0           | 0           |
| UIJ68483.1 | nitroreductase_family_protein_[Bacillus_cereus]                              | CPTF_Co         | 0           | 0           | 0           |
| UIJ68483.1 | nitroreductase_family_protein_[Bacillus_cereus]                              | CPTF_Cu         | 0           | 0           | 0           |
| UIJ68483.1 | nitroreductase_family_protein_[Bacillus_cereus]                              | CPTF_Fe         | 8686.2      | 15044.93972 | 173.2050808 |
| UIJ68483.1 | nitroreductase_family_protein_[Bacillus_cereus]                              | CPTF_Mn         | 0           | 0           | 0           |
| UIJ68483.1 | nitroreductase_family_protein_[Bacillus_cereus]                              | CPTF_Ni         | 26487.6     | 45877.86897 | 173.2050808 |
| UIJ68483.1 | nitroreductase_family_protein_[Bacillus_cereus]                              | CPTF_U          | 0           | 0           | 0           |
| UIJ68483.1 | nitroreductase_family_protein_[Bacillus_cereus]                              | CPTF_metals_mix | 0           | 0           | 0           |
| UIJ68483.1 | nitroreductase_family_protein_[Bacillus_cereus]                              | CPTF_zcontrol   | 0           | 0           | 0           |
| UIJ68485.1 | cysteine_hydrolase_[Bacillus_cereus]                                         | CPTF_Al         | 355422.69   | 18153.71273 | 5.107640352 |
| UIJ68485.1 | cysteine_hydrolase_[Bacillus_cereus]                                         | CPTF_Cd         | 411561.2333 | 46330.92019 | 11.2573577  |
| UIJ68485.1 | cysteine_hydrolase_[Bacillus_cereus]                                         | CPTF_Co         | 355200.0667 | 42308.61891 | 11.91120804 |
| UIJ68485.1 | cysteine_hydrolase_[Bacillus_cereus]                                         | CPTF_Cu         | 415902.9667 | 27329.31952 | 6.571080687 |
| UIJ68485.1 | cysteine_hydrolase_[Bacillus_cereus]                                         | CPTF_Fe         | 402200.9    | 23959.2413  | 5.957033239 |
| UIJ68485.1 | cysteine_hydrolase_[Bacillus_cereus]                                         | CPTF_Mn         | 362491      | 48247.76667 | 13.31005919 |
| UIJ68485.1 | cysteine_hydrolase_[Bacillus_cereus]                                         | CPTF_Ni         | 394666.6333 | 21771.34651 | 5.51638894  |
| UIJ68485.1 | cysteine_hydrolase_[Bacillus_cereus]                                         | CPTF_U          | 453326.4333 | 87556.89367 | 19.31431464 |
| UIJ68485.1 | cysteine_hydrolase_[Bacillus_cereus]                                         | CPTF_metals_mix | 585292.17   | 13154.34173 | 2.247482951 |
| UIJ68485.1 | cysteine_hydrolase_[Bacillus_cereus]                                         | CPTF_zcontrol   | 379229.3333 | 24614.22683 | 6.490591488 |
| UIJ68491.1 | alcohol_dehydrogenase_AdhP_[Bacillus_cereus]                                 | CPTF_Al         | 5556001.667 | 475081.5113 | 8.550780575 |
| UIJ68491.1 | alcohol_dehydrogenase_AdhP_[Bacillus_cereus]                                 | CPTF_Cd         | 7023667     | 864118.543  | 12.30295433 |
| UIJ68491.1 | alcohol_dehydrogenase_AdhP_[Bacillus_cereus]                                 | CPTF_Co         | 5588730.9   | 387743.4158 | 6.93795108  |
| UIJ68491.1 | alcohol_dehydrogenase_AdhP_[Bacillus_cereus]                                 | CPTF_Cu         | 5963003.633 | 287068.404  | 4.814157791 |
| UIJ68491.1 | alcohol_dehydrogenase_AdhP_[Bacillus_cereus]                                 | CPTF_Fe         | 5324767.067 | 48806.39711 | 0.916592153 |
| UIJ68491.1 | alcohol_dehydrogenase_AdhP_[Bacillus_cereus]                                 | CPTF_Mn         | 6393816.1   | 2555343.72  | 39.96586201 |
| UIJ68491.1 | alcohol_dehydrogenase_AdhP_[Bacillus_cereus]                                 | CPTF_Ni         | 5492694.633 | 321575.0273 | 5.854595035 |
| UIJ68491.1 | alcohol_dehydrogenase_AdhP_[Bacillus_cereus]                                 | CPTF_U          | 4996152.333 | 48743.05096 | 0.975611785 |
| UIJ68491.1 | alcohol_dehydrogenase_AdhP_[Bacillus_cereus]                                 | CPTF_metals_mix | 38998061.13 | 9207600.016 | 23.61040459 |
| UIJ68491.1 | alcohol_dehydrogenase_AdhP_[Bacillus_cereus]                                 | CPTF_zcontrol   | 4924017     | 365254.9237 | 7.417824181 |
| UIJ68496.1 | decarboxylating_6-phosphogluconate_dehydrogenase_[Bacillus_cereus]           | CPTF_Al         | 743160.4333 | 140132.3699 | 18.85627431 |
| UIJ68496.1 | decarboxylating_6-phosphogluconate_dehydrogenase_[Bacillus_cereus]           | CPTF_Cd         | 883274.3333 | 65240.96702 | 7.386263198 |
| UIJ68496.1 | decarboxylating_6-phosphogluconate_dehydrogenase_[Bacillus_cereus]           | CPTF_Co         | 803536.7    | 98546.95911 | 12.26415161 |
| UIJ68496.1 | decarboxylating_6-phosphogluconate_dehydrogenase_[Bacillus_cereus]           | CPTF_Cu         | 777760.1667 | 28609.7212  | 3.678476017 |
| UIJ68496.1 | decarboxylating_6-phosphogluconate_dehydrogenase_[Bacillus_cereus]           | CPTF_Fe         | 757360      | 123922.9743 | 16.36249265 |



|            |                                                                      |                 |             |             |             |
|------------|----------------------------------------------------------------------|-----------------|-------------|-------------|-------------|
| UIJ68496.1 | decarboxylating_6-phosphogluconate_dehydrogenase [Bacillus_cereus]   | CPTF_Mn         | 795747.6667 | 254701.9535 | 32.00787941 |
| UIJ68496.1 | decarboxylating_6-phosphogluconate_dehydrogenase [Bacillus_cereus]   | CPTF_Ni         | 700369.5333 | 161520.5779 | 23.06219363 |
| UIJ68496.1 | decarboxylating_6-phosphogluconate_dehydrogenase [Bacillus_cereus]   | CPTF_U          | 441433.3333 | 393036.3484 | 89.03640001 |
| UIJ68496.1 | decarboxylating_6-phosphogluconate_dehydrogenase [Bacillus_cereus]   | CPTF_metals_mix | 780155.1667 | 168661.8055 | 21.61900769 |
| UIJ68496.1 | decarboxylating_6-phosphogluconate_dehydrogenase [Bacillus_cereus]   | CPTF_zcontrol   | 1043527.6   | 169100.0804 | 16.20465816 |
| UIJ68499.1 | NAD(P)H-dependent_oxidoreductase [Bacillus_cereus]                   | CPTF_Al         | 1891424.967 | 491270.6475 | 25.97357316 |
| UIJ68499.1 | NAD(P)H-dependent_oxidoreductase [Bacillus_cereus]                   | CPTF_Cd         | 1423613.667 | 297595.9122 | 20.9042607  |
| UIJ68499.1 | NAD(P)H-dependent_oxidoreductase [Bacillus_cereus]                   | CPTF_Co         | 2043292.567 | 231929.9973 | 11.35079729 |
| UIJ68499.1 | NAD(P)H-dependent_oxidoreductase [Bacillus_cereus]                   | CPTF_Cu         | 1985409.967 | 231142.013  | 11.64202945 |
| UIJ68499.1 | NAD(P)H-dependent_oxidoreductase [Bacillus_cereus]                   | CPTF_Fe         | 1241364.4   | 206944.2853 | 16.67071211 |
| UIJ68499.1 | NAD(P)H-dependent_oxidoreductase [Bacillus_cereus]                   | CPTF_Mn         | 1646412.5   | 433717.6543 | 26.34319494 |
| UIJ68499.1 | NAD(P)H-dependent_oxidoreductase [Bacillus_cereus]                   | CPTF_Ni         | 1651285.033 | 842875.4456 | 51.04360717 |
| UIJ68499.1 | NAD(P)H-dependent_oxidoreductase [Bacillus_cereus]                   | CPTF_U          | 1308109.333 | 84802.36245 | 6.482819156 |
| UIJ68499.1 | NAD(P)H-dependent_oxidoreductase [Bacillus_cereus]                   | CPTF_metals_mix | 1572867.633 | 271436.4098 | 17.25742231 |
| UIJ68499.1 | NAD(P)H-dependent_oxidoreductase [Bacillus_cereus]                   | CPTF_zcontrol   | 1716836.533 | 311855.6526 | 18.16455128 |
| UIJ68503.1 | ABC_transporter_permease/substrate-binding_protein [Bacillus_cereus] | CPTF_Al         | 0           | 0           | 0           |
| UIJ68503.1 | ABC_transporter_permease/substrate-binding_protein [Bacillus_cereus] | CPTF_Cd         | 320152      | 554519.5301 | 173.2050808 |
| UIJ68503.1 | ABC_transporter_permease/substrate-binding_protein [Bacillus_cereus] | CPTF_Co         | 0           | 0           | 0           |
| UIJ68503.1 | ABC_transporter_permease/substrate-binding_protein [Bacillus_cereus] | CPTF_Cu         | 0           | 0           | 0           |
| UIJ68503.1 | ABC_transporter_permease/substrate-binding_protein [Bacillus_cereus] | CPTF_Fe         | 0           | 0           | 0           |
| UIJ68503.1 | ABC_transporter_permease/substrate-binding_protein [Bacillus_cereus] | CPTF_Mn         | 285793.3333 | 495008.5738 | 173.2050808 |
| UIJ68503.1 | ABC_transporter_permease/substrate-binding_protein [Bacillus_cereus] | CPTF_Ni         | 0           | 0           | 0           |
| UIJ68503.1 | ABC_transporter_permease/substrate-binding_protein [Bacillus_cereus] | CPTF_U          | 279502.6667 | 484112.8195 | 173.2050808 |
| UIJ68503.1 | ABC_transporter_permease/substrate-binding_protein [Bacillus_cereus] | CPTF_metals_mix | 0           | 0           | 0           |
| UIJ68503.1 | ABC_transporter_permease/substrate-binding_protein [Bacillus_cereus] | CPTF_zcontrol   | 0           | 0           | 0           |
| UIJ68505.1 | LemA_domain_protein [Bacillus_cereus]                                | CPTF_Al         | 213002.1667 | 17691.30558 | 8.30569278  |
| UIJ68505.1 | LemA_domain_protein [Bacillus_cereus]                                | CPTF_Cd         | 294506.6667 | 68424.47632 | 23.23359165 |
| UIJ68505.1 | LemA_domain_protein [Bacillus_cereus]                                | CPTF_Co         | 233279.9667 | 48588.66466 | 20.8284772  |
| UIJ68505.1 | LemA_domain_protein [Bacillus_cereus]                                | CPTF_Cu         | 175301.8    | 47901.78336 | 27.32532316 |
| UIJ68505.1 | LemA_domain_protein [Bacillus_cereus]                                | CPTF_Fe         | 280990.3333 | 63082.73582 | 22.45014449 |
| UIJ68505.1 | LemA_domain_protein [Bacillus_cereus]                                | CPTF_Mn         | 233311.3    | 88534.52274 | 37.94695016 |
| UIJ68505.1 | LemA_domain_protein [Bacillus_cereus]                                | CPTF_Ni         | 245882.5667 | 76447.46837 | 31.09104863 |
| UIJ68505.1 | LemA_domain_protein [Bacillus_cereus]                                | CPTF_U          | 0           | 0           | 0           |
| UIJ68505.1 | LemA_domain_protein [Bacillus_cereus]                                | CPTF_metals_mix | 136834.4    | 10279.60291 | 7.512440519 |
| UIJ68505.1 | LemA_domain_protein [Bacillus_cereus]                                | CPTF_zcontrol   | 199032.3333 | 106060.3238 | 53.28798696 |
| UIJ68510.1 | aldehyde_dehydrogenase_family_protein [Bacillus_cereus]              | CPTF_Al         | 12890.56667 | 22327.11641 | 173.2050808 |
| UIJ68510.1 | aldehyde_dehydrogenase_family_protein [Bacillus_cereus]              | CPTF_Cd         | 45686.83333 | 43260.10712 | 94.68834665 |
| UIJ68510.1 | aldehyde_dehydrogenase_family_protein [Bacillus_cereus]              | CPTF_Co         | 109991.9333 | 159647.7502 | 145.1449623 |
| UIJ68510.1 | aldehyde_dehydrogenase_family_protein [Bacillus_cereus]              | CPTF_Cu         | 0           | 0           | 0           |
| UIJ68510.1 | aldehyde_dehydrogenase_family_protein [Bacillus_cereus]              | CPTF_Fe         | 28408.23333 | 49204.50349 | 173.2050808 |
| UIJ68510.1 | aldehyde_dehydrogenase_family_protein [Bacillus_cereus]              | CPTF_Mn         | 0           | 0           | 0           |
| UIJ68510.1 | aldehyde_dehydrogenase_family_protein [Bacillus_cereus]              | CPTF_Ni         | 0           | 0           | 0           |
| UIJ68510.1 | aldehyde_dehydrogenase_family_protein [Bacillus_cereus]              | CPTF_U          | 20270.76667 | 35109.99778 | 173.2050808 |
| UIJ68510.1 | aldehyde_dehydrogenase_family_protein [Bacillus_cereus]              | CPTF_metals_mix | 54890.46667 | 9988.233898 | 18.1966642  |
| UIJ68510.1 | aldehyde_dehydrogenase_family_protein [Bacillus_cereus]              | CPTF_zcontrol   | 0           | 0           | 0           |
| UIJ68511.1 | Yuel_family_protein [Bacillus_cereus]                                | CPTF_Al         | 50767.46667 | 50027.20627 | 98.54186067 |
| UIJ68511.1 | Yuel_family_protein [Bacillus_cereus]                                | CPTF_Cd         | 60307.63333 | 68381.06152 | 113.3870751 |
| UIJ68511.1 | Yuel_family_protein [Bacillus_cereus]                                | CPTF_Co         | 91118.1     | 48525.80307 | 53.25594263 |
| UIJ68511.1 | Yuel_family_protein [Bacillus_cereus]                                | CPTF_Cu         | 73360.2     | 13717.79971 | 18.6992398  |
| UIJ68511.1 | Yuel_family_protein [Bacillus_cereus]                                | CPTF_Fe         | 82552.33333 | 5238.098653 | 6.345185461 |
| UIJ68511.1 | Yuel_family_protein [Bacillus_cereus]                                | CPTF_Mn         | 0           | 0           | 0           |
| UIJ68511.1 | Yuel_family_protein [Bacillus_cereus]                                | CPTF_Ni         | 18890.46667 | 32719.24805 | 173.2050808 |
| UIJ68511.1 | Yuel_family_protein [Bacillus_cereus]                                | CPTF_U          | 33379       | 57814.12391 | 173.2050808 |
| UIJ68511.1 | Yuel_family_protein [Bacillus_cereus]                                | CPTF_metals_mix | 86362       | 23647.67201 | 27.38203378 |
| UIJ68511.1 | Yuel_family_protein [Bacillus_cereus]                                | CPTF_zcontrol   | 0           | 0           | 0           |
| UIJ68519.1 | lysine_2,3-aminomutase [Bacillus_cereus]                             | CPTF_Al         | 2902560.333 | 269832.1125 | 9.296348103 |
| UIJ68519.1 | lysine_2,3-aminomutase [Bacillus_cereus]                             | CPTF_Cd         | 2857391.4   | 384467.7269 | 13.45519997 |
| UIJ68519.1 | lysine_2,3-aminomutase [Bacillus_cereus]                             | CPTF_Co         | 1859005.367 | 205129.0563 | 11.0343445  |
| UIJ68519.1 | lysine_2,3-aminomutase [Bacillus_cereus]                             | CPTF_Cu         | 2978251.733 | 350881.4854 | 11.78145828 |
| UIJ68519.1 | lysine_2,3-aminomutase [Bacillus_cereus]                             | CPTF_Fe         | 3169211     | 593420.0897 | 18.72453711 |
| UIJ68519.1 | lysine_2,3-aminomutase [Bacillus_cereus]                             | CPTF_Mn         | 2846234.467 | 479207.5708 | 16.83654584 |

|            |                                                           |                 |             |             |             |
|------------|-----------------------------------------------------------|-----------------|-------------|-------------|-------------|
| UIJ68519.1 | lysine_2,3-aminomutase [Bacillus cereus]                  | CPTF_Ni         | 2002006.767 | 571969.5689 | 28.56981197 |
| UIJ68519.1 | lysine_2,3-aminomutase [Bacillus cereus]                  | CPTF_U          | 2097281     | 228101.3711 | 10.87605195 |
| UIJ68519.1 | lysine_2,3-aminomutase [Bacillus cereus]                  | CPTF_metals_mix | 4011361.733 | 241365.3076 | 6.017041684 |
| UIJ68519.1 | lysine_2,3-aminomutase [Bacillus cereus]                  | CPTF_zcontrol   | 2322068.333 | 83110.07401 | 3.579139891 |
| UIJ68520.1 | YokU_family_protein [Bacillus cereus]                     | CPTF_Al         | 26803.83333 | 46425.60117 | 173.2050808 |
| UIJ68520.1 | YokU_family_protein [Bacillus cereus]                     | CPTF_Cd         | 0           | 0           | 0           |
| UIJ68520.1 | YokU_family_protein [Bacillus cereus]                     | CPTF_Co         | 0           | 0           | 0           |
| UIJ68520.1 | YokU_family_protein [Bacillus cereus]                     | CPTF_Cu         | 0           | 0           | 0           |
| UIJ68520.1 | YokU_family_protein [Bacillus cereus]                     | CPTF_Fe         | 0           | 0           | 0           |
| UIJ68520.1 | YokU_family_protein [Bacillus cereus]                     | CPTF_Mn         | 0           | 0           | 0           |
| UIJ68520.1 | YokU_family_protein [Bacillus cereus]                     | CPTF_Ni         | 0           | 0           | 0           |
| UIJ68520.1 | YokU_family_protein [Bacillus cereus]                     | CPTF_U          | 0           | 0           | 0           |
| UIJ68520.1 | YokU_family_protein [Bacillus cereus]                     | CPTF_metals_mix | 191726.3333 | 14256.47885 | 7.435848069 |
| UIJ68520.1 | YokU_family_protein [Bacillus cereus]                     | CPTF_zcontrol   | 0           | 0           | 0           |
| UIJ68527.1 | sporulation_protein [Bacillus cereus]                     | CPTF_Al         | 134525.2    | 25513.36324 | 18.96548991 |
| UIJ68527.1 | sporulation_protein [Bacillus cereus]                     | CPTF_Cd         | 268242.3333 | 72703.37034 | 27.10361539 |
| UIJ68527.1 | sporulation_protein [Bacillus cereus]                     | CPTF_Co         | 138883.1333 | 102267.0756 | 73.63534591 |
| UIJ68527.1 | sporulation_protein [Bacillus cereus]                     | CPTF_Cu         | 210586.5    | 149317.3774 | 70.90548414 |
| UIJ68527.1 | sporulation_protein [Bacillus cereus]                     | CPTF_Fe         | 290841.9    | 177388.5977 | 60.99141758 |
| UIJ68527.1 | sporulation_protein [Bacillus cereus]                     | CPTF_Mn         | 281276.4    | 249139.8705 | 88.57475085 |
| UIJ68527.1 | sporulation_protein [Bacillus cereus]                     | CPTF_Ni         | 84323.73333 | 83958.90466 | 99.56734759 |
| UIJ68527.1 | sporulation_protein [Bacillus cereus]                     | CPTF_U          | 12585.96667 | 21799.53733 | 173.2050808 |
| UIJ68527.1 | sporulation_protein [Bacillus cereus]                     | CPTF_metals_mix | 1568076.5   | 175796.8462 | 11.21098659 |
| UIJ68527.1 | sporulation_protein [Bacillus cereus]                     | CPTF_zcontrol   | 99901.86667 | 77931.33425 | 78.00788599 |
| UIJ68530.1 | thioredoxin_family_protein [Bacillus cereus]              | CPTF_Al         | 22621.26667 | 39181.1832  | 173.2050808 |
| UIJ68530.1 | thioredoxin_family_protein [Bacillus cereus]              | CPTF_Cd         | 34129.43333 | 29659.10584 | 86.90184085 |
| UIJ68530.1 | thioredoxin_family_protein [Bacillus cereus]              | CPTF_Co         | 13595.1     | 23547.40393 | 173.2050808 |
| UIJ68530.1 | thioredoxin_family_protein [Bacillus cereus]              | CPTF_Cu         | 0           | 0           | 0           |
| UIJ68530.1 | thioredoxin_family_protein [Bacillus cereus]              | CPTF_Fe         | 0           | 0           | 0           |
| UIJ68530.1 | thioredoxin_family_protein [Bacillus cereus]              | CPTF_Mn         | 31034.9     | 53754.02361 | 173.2050808 |
| UIJ68530.1 | thioredoxin_family_protein [Bacillus cereus]              | CPTF_Ni         | 53041.56667 | 47694.23919 | 89.91860947 |
| UIJ68530.1 | thioredoxin_family_protein [Bacillus cereus]              | CPTF_U          | 59304.33333 | 102718.1184 | 173.2050808 |
| UIJ68530.1 | thioredoxin_family_protein [Bacillus cereus]              | CPTF_metals_mix | 399706.3    | 62216.34681 | 15.56551568 |
| UIJ68530.1 | thioredoxin_family_protein [Bacillus cereus]              | CPTF_zcontrol   | 0           | 0           | 0           |
| UIJ68548.1 | PBP1A_family_penicillin-binding_protein [Bacillus cereus] | CPTF_Al         | 39089.53333 | 36037.0558  | 92.19106171 |
| UIJ68548.1 | PBP1A_family_penicillin-binding_protein [Bacillus cereus] | CPTF_Cd         | 37859.5     | 33721.1926  | 89.06930256 |
| UIJ68548.1 | PBP1A_family_penicillin-binding_protein [Bacillus cereus] | CPTF_Co         | 50723.76667 | 7535.714024 | 14.85637704 |
| UIJ68548.1 | PBP1A_family_penicillin-binding_protein [Bacillus cereus] | CPTF_Cu         | 119616.2667 | 67543.86495 | 56.46712344 |
| UIJ68548.1 | PBP1A_family_penicillin-binding_protein [Bacillus cereus] | CPTF_Fe         | 50232.8     | 57724.50759 | 114.9139757 |
| UIJ68548.1 | PBP1A_family_penicillin-binding_protein [Bacillus cereus] | CPTF_Mn         | 32566.73333 | 29026.05592 | 89.12793194 |
| UIJ68548.1 | PBP1A_family_penicillin-binding_protein [Bacillus cereus] | CPTF_Ni         | 43954.3     | 38067.24317 | 86.60641432 |
| UIJ68548.1 | PBP1A_family_penicillin-binding_protein [Bacillus cereus] | CPTF_U          | 0           | 0           | 0           |
| UIJ68548.1 | PBP1A_family_penicillin-binding_protein [Bacillus cereus] | CPTF_metals_mix | 245079.7    | 14473.21934 | 5.905515364 |
| UIJ68548.1 | PBP1A_family_penicillin-binding_protein [Bacillus cereus] | CPTF_zcontrol   | 9788.533333 | 16954.23706 | 173.2050808 |
| UIJ68552.1 | citrate_synthase [Bacillus cereus]                        | CPTF_Al         | 1793163.833 | 266724.1556 | 14.87450007 |
| UIJ68552.1 | citrate_synthase [Bacillus cereus]                        | CPTF_Cd         | 1629604     | 506605.1558 | 31.08762348 |
| UIJ68552.1 | citrate_synthase [Bacillus cereus]                        | CPTF_Co         | 1674203.633 | 205099.513  | 12.25057149 |
| UIJ68552.1 | citrate_synthase [Bacillus cereus]                        | CPTF_Cu         | 1322832.1   | 442517.6556 | 33.45229191 |
| UIJ68552.1 | citrate_synthase [Bacillus cereus]                        | CPTF_Fe         | 1625931.833 | 363205.1609 | 22.33827725 |
| UIJ68552.1 | citrate_synthase [Bacillus cereus]                        | CPTF_Mn         | 1448514.2   | 558713.1296 | 38.57146375 |
| UIJ68552.1 | citrate_synthase [Bacillus cereus]                        | CPTF_Ni         | 1344598.567 | 236450.7494 | 17.58522992 |
| UIJ68552.1 | citrate_synthase [Bacillus cereus]                        | CPTF_U          | 1126458.2   | 301232.1217 | 26.74152682 |
| UIJ68552.1 | citrate_synthase [Bacillus cereus]                        | CPTF_metals_mix | 2794777     | 243647.9589 | 8.717974954 |
| UIJ68552.1 | citrate_synthase [Bacillus cereus]                        | CPTF_zcontrol   | 1176101     | 141255.5717 | 12.01049669 |
| UIJ68553.1 | 2-methylcitrate_dehydratase [Bacillus cereus]             | CPTF_Al         | 5530776.5   | 222634.4347 | 4.025373918 |
| UIJ68553.1 | 2-methylcitrate_dehydratase [Bacillus cereus]             | CPTF_Cd         | 5991756.7   | 264781.9551 | 4.419103918 |
| UIJ68553.1 | 2-methylcitrate_dehydratase [Bacillus cereus]             | CPTF_Co         | 5377158.1   | 344002.6143 | 6.397480006 |
| UIJ68553.1 | 2-methylcitrate_dehydratase [Bacillus cereus]             | CPTF_Cu         | 5468895.667 | 192164.9113 | 3.513779071 |
| UIJ68553.1 | 2-methylcitrate_dehydratase [Bacillus cereus]             | CPTF_Fe         | 6025119.933 | 290383.3396 | 4.819544553 |
| UIJ68553.1 | 2-methylcitrate_dehydratase [Bacillus cereus]             | CPTF_Mn         | 5194628.933 | 658125.1671 | 12.66933934 |
| UIJ68553.1 | 2-methylcitrate_dehydratase [Bacillus cereus]             | CPTF_Ni         | 4844557.033 | 544825.3816 | 11.24613412 |

|            |                                                                           |                 |             |             |             |
|------------|---------------------------------------------------------------------------|-----------------|-------------|-------------|-------------|
| UIJ68553.1 | 2-methylcitrate_dehydratase_[Bacillus_cereus]                             | CPTF_U          | 5240168     | 890532.7725 | 16.99435538 |
| UIJ68553.1 | 2-methylcitrate_dehydratase_[Bacillus_cereus]                             | CPTF_metals_mix | 4736533.9   | 219247.2529 | 4.628854296 |
| UIJ68553.1 | 2-methylcitrate_dehydratase_[Bacillus_cereus]                             | CPTF_zcontrol   | 5030543.067 | 102363.4121 | 2.034838201 |
| UIJ68554.1 | methylisocitrate_lyase_[Bacillus_cereus]                                  | CPTF_Al         | 1229960.633 | 97690.03446 | 7.942533428 |
| UIJ68554.1 | methylisocitrate_lyase_[Bacillus_cereus]                                  | CPTF_Cd         | 1496824.733 | 190396.5847 | 12.72003198 |
| UIJ68554.1 | methylisocitrate_lyase_[Bacillus_cereus]                                  | CPTF_Co         | 1033896.6   | 88111.07827 | 8.5222331   |
| UIJ68554.1 | methylisocitrate_lyase_[Bacillus_cereus]                                  | CPTF_Cu         | 1258726.367 | 129095.7479 | 10.25606131 |
| UIJ68554.1 | methylisocitrate_lyase_[Bacillus_cereus]                                  | CPTF_Fe         | 1414210     | 357229.5829 | 25.26000968 |
| UIJ68554.1 | methylisocitrate_lyase_[Bacillus_cereus]                                  | CPTF_Mn         | 1436631.267 | 52864.82989 | 3.67977206  |
| UIJ68554.1 | methylisocitrate_lyase_[Bacillus_cereus]                                  | CPTF_Ni         | 1288333.133 | 113574.476  | 8.815613992 |
| UIJ68554.1 | methylisocitrate_lyase_[Bacillus_cereus]                                  | CPTF_U          | 1526947.9   | 163265.2662 | 10.69226175 |
| UIJ68554.1 | methylisocitrate_lyase_[Bacillus_cereus]                                  | CPTF_metals_mix | 1757876.3   | 167517.2539 | 9.529524569 |
| UIJ68554.1 | methylisocitrate_lyase_[Bacillus_cereus]                                  | CPTF_zcontrol   | 1278482     | 170298.2787 | 13.32035013 |
| UIJ68555.1 | acyl-CoA_dehydrogenase_family_protein_[Bacillus_cereus]                   | CPTF_Al         | 0           | 0           | 0           |
| UIJ68555.1 | acyl-CoA_dehydrogenase_family_protein_[Bacillus_cereus]                   | CPTF_Cd         | 27962.63333 | 28016.00163 | 100.1908558 |
| UIJ68555.1 | acyl-CoA_dehydrogenase_family_protein_[Bacillus_cereus]                   | CPTF_Co         | 0           | 0           | 0           |
| UIJ68555.1 | acyl-CoA_dehydrogenase_family_protein_[Bacillus_cereus]                   | CPTF_Cu         | 0           | 0           | 0           |
| UIJ68555.1 | acyl-CoA_dehydrogenase_family_protein_[Bacillus_cereus]                   | CPTF_Fe         | 0           | 0           | 0           |
| UIJ68555.1 | acyl-CoA_dehydrogenase_family_protein_[Bacillus_cereus]                   | CPTF_Mn         | 0           | 0           | 0           |
| UIJ68555.1 | acyl-CoA_dehydrogenase_family_protein_[Bacillus_cereus]                   | CPTF_Ni         | 0           | 0           | 0           |
| UIJ68555.1 | acyl-CoA_dehydrogenase_family_protein_[Bacillus_cereus]                   | CPTF_U          | 11410       | 19762.69971 | 173.2050808 |
| UIJ68555.1 | acyl-CoA_dehydrogenase_family_protein_[Bacillus_cereus]                   | CPTF_metals_mix | 200836.6    | 136463.3354 | 67.94744353 |
| UIJ68555.1 | acyl-CoA_dehydrogenase_family_protein_[Bacillus_cereus]                   | CPTF_zcontrol   | 0           | 0           | 0           |
| UIJ68556.1 | NAD(P)-dependent_oxidoreductase_[Bacillus_cereus]                         | CPTF_Al         | 315376.6667 | 32482.13208 | 10.29947219 |
| UIJ68556.1 | NAD(P)-dependent_oxidoreductase_[Bacillus_cereus]                         | CPTF_Cd         | 362651.3333 | 23610.37582 | 6.51048918  |
| UIJ68556.1 | NAD(P)-dependent_oxidoreductase_[Bacillus_cereus]                         | CPTF_Co         | 332134.6667 | 68921.97114 | 20.75121217 |
| UIJ68556.1 | NAD(P)-dependent_oxidoreductase_[Bacillus_cereus]                         | CPTF_Cu         | 376512.3333 | 102671.8492 | 27.26918619 |
| UIJ68556.1 | NAD(P)-dependent_oxidoreductase_[Bacillus_cereus]                         | CPTF_Fe         | 364027      | 6929.019628 | 1.903435632 |
| UIJ68556.1 | NAD(P)-dependent_oxidoreductase_[Bacillus_cereus]                         | CPTF_Mn         | 334948      | 76374.86621 | 22.80200694 |
| UIJ68556.1 | NAD(P)-dependent_oxidoreductase_[Bacillus_cereus]                         | CPTF_Ni         | 318685.6667 | 41959.22699 | 13.16633642 |
| UIJ68556.1 | NAD(P)-dependent_oxidoreductase_[Bacillus_cereus]                         | CPTF_U          | 400912.3333 | 56171.30875 | 14.01087073 |
| UIJ68556.1 | NAD(P)-dependent_oxidoreductase_[Bacillus_cereus]                         | CPTF_metals_mix | 518879.4333 | 57007.5749  | 19.98667074 |
| UIJ68556.1 | NAD(P)-dependent_oxidoreductase_[Bacillus_cereus]                         | CPTF_zcontrol   | 299327.3333 | 41488.40506 | 13.86054678 |
| UIJ68557.1 | CoA-acylating_methylmalonate-semialdehyde_dehydrogenase_[Bacillus_cereus] | CPTF_Al         | 3203501.467 | 268338.3596 | 8.376408203 |
| UIJ68557.1 | CoA-acylating_methylmalonate-semialdehyde_dehydrogenase_[Bacillus_cereus] | CPTF_Cd         | 3243462.3   | 249627.3963 | 7.696324889 |
| UIJ68557.1 | CoA-acylating_methylmalonate-semialdehyde_dehydrogenase_[Bacillus_cereus] | CPTF_Co         | 2854542.767 | 672422.747  | 23.55623306 |
| UIJ68557.1 | CoA-acylating_methylmalonate-semialdehyde_dehydrogenase_[Bacillus_cereus] | CPTF_Cu         | 3248819.767 | 234051.8151 | 7.204210512 |
| UIJ68557.1 | CoA-acylating_methylmalonate-semialdehyde_dehydrogenase_[Bacillus_cereus] | CPTF_Fe         | 3205238.333 | 674154.9035 | 21.0329103  |
| UIJ68557.1 | CoA-acylating_methylmalonate-semialdehyde_dehydrogenase_[Bacillus_cereus] | CPTF_Mn         | 2988665     | 653195.0084 | 21.85574524 |
| UIJ68557.1 | CoA-acylating_methylmalonate-semialdehyde_dehydrogenase_[Bacillus_cereus] | CPTF_Ni         | 3204000.2   | 78388.32606 | 2.446576815 |
| UIJ68557.1 | CoA-acylating_methylmalonate-semialdehyde_dehydrogenase_[Bacillus_cereus] | CPTF_U          | 3393109.667 | 526804.4617 | 15.52571279 |
| UIJ68557.1 | CoA-acylating_methylmalonate-semialdehyde_dehydrogenase_[Bacillus_cereus] | CPTF_metals_mix | 4417141.9   | 627474.1527 | 14.20543344 |
| UIJ68557.1 | CoA-acylating_methylmalonate-semialdehyde_dehydrogenase_[Bacillus_cereus] | CPTF_zcontrol   | 3156135.333 | 203856.3865 | 6.459050865 |
| UIJ68559.1 | enoyl-CoA_hydratase/isomerase_family_protein_[Bacillus_cereus]            | CPTF_Al         | 3691610.633 | 155884.5929 | 4.222671576 |
| UIJ68559.1 | enoyl-CoA_hydratase/isomerase_family_protein_[Bacillus_cereus]            | CPTF_Cd         | 4696836.333 | 241650.028  | 5.144953132 |
| UIJ68559.1 | enoyl-CoA_hydratase/isomerase_family_protein_[Bacillus_cereus]            | CPTF_Co         | 3654454.633 | 227672.9002 | 6.230010303 |
| UIJ68559.1 | enoyl-CoA_hydratase/isomerase_family_protein_[Bacillus_cereus]            | CPTF_Cu         | 3372583.3   | 172503.7951 | 5.114886119 |
| UIJ68559.1 | enoyl-CoA_hydratase/isomerase_family_protein_[Bacillus_cereus]            | CPTF_Fe         | 4022324.333 | 102641.1334 | 2.5517866   |
| UIJ68559.1 | enoyl-CoA_hydratase/isomerase_family_protein_[Bacillus_cereus]            | CPTF_Mn         | 4079835.6   | 119630.4711 | 2.93223754  |
| UIJ68559.1 | enoyl-CoA_hydratase/isomerase_family_protein_[Bacillus_cereus]            | CPTF_Ni         | 3634785.5   | 172192.6215 | 4.737353044 |
| UIJ68559.1 | enoyl-CoA_hydratase/isomerase_family_protein_[Bacillus_cereus]            | CPTF_U          | 3977895.367 | 495150.5297 | 12.44755038 |
| UIJ68559.1 | enoyl-CoA_hydratase/isomerase_family_protein_[Bacillus_cereus]            | CPTF_metals_mix | 2911113.5   | 68670.30009 | 2.358901503 |
| UIJ68559.1 | enoyl-CoA_hydratase/isomerase_family_protein_[Bacillus_cereus]            | CPTF_zcontrol   | 3942525.333 | 149189.365  | 3.784106693 |
| UIJ68562.1 | exonuclease_SbcCD_subunit_D_[Bacillus_cereus]                             | CPTF_Al         | 68475.1     | 15428.9717  | 22.53223682 |
| UIJ68562.1 | exonuclease_SbcCD_subunit_D_[Bacillus_cereus]                             | CPTF_Cd         | 36466       | 32843.86917 | 90.06710133 |
| UIJ68562.1 | exonuclease_SbcCD_subunit_D_[Bacillus_cereus]                             | CPTF_Co         | 52194.6     | 17010.40507 | 32.59035431 |
| UIJ68562.1 | exonuclease_SbcCD_subunit_D_[Bacillus_cereus]                             | CPTF_Cu         | 27326.46667 | 23774.95345 | 87.00339396 |
| UIJ68562.1 | exonuclease_SbcCD_subunit_D_[Bacillus_cereus]                             | CPTF_Fe         | 17078.1     | 29580.1369  | 173.2050808 |
| UIJ68562.1 | exonuclease_SbcCD_subunit_D_[Bacillus_cereus]                             | CPTF_Mn         | 33967.23333 | 29691.08506 | 87.41096092 |
| UIJ68562.1 | exonuclease_SbcCD_subunit_D_[Bacillus_cereus]                             | CPTF_Ni         | 33216.23333 | 28787.2541  | 86.66622075 |
| UIJ68562.1 | exonuclease_SbcCD_subunit_D_[Bacillus_cereus]                             | CPTF_U          | 0           | 0           | 0           |

|            |                                                                    |                 |             |             |             |
|------------|--------------------------------------------------------------------|-----------------|-------------|-------------|-------------|
| UIJ68562.1 | exonuclease_SbcCD_subunit_D_[Bacillus_cereus]                      | CPTF_metals_mix | 13473.36667 | 23336.55562 | 173.2050808 |
| UIJ68562.1 | exonuclease_SbcCD_subunit_D_[Bacillus_cereus]                      | CPTF_zcontrol   | 13961.76667 | 24182.48923 | 173.2050808 |
| UIJ68563.1 | SMC_family_ATPase_[Bacillus_cereus]                                | CPTF_Al         | 201723.1333 | 187243.1005 | 92.82182831 |
| UIJ68563.1 | SMC_family_ATPase_[Bacillus_cereus]                                | CPTF_Cd         | 219765.8333 | 325766.8163 | 148.2336046 |
| UIJ68563.1 | SMC_family_ATPase_[Bacillus_cereus]                                | CPTF_Co         | 265273.1667 | 249538.6792 | 94.06857178 |
| UIJ68563.1 | SMC_family_ATPase_[Bacillus_cereus]                                | CPTF_Cu         | 127279.8667 | 35153.51095 | 27.61906645 |
| UIJ68563.1 | SMC_family_ATPase_[Bacillus_cereus]                                | CPTF_Fe         | 108370.6667 | 28547.22593 | 26.34220754 |
| UIJ68563.1 | SMC_family_ATPase_[Bacillus_cereus]                                | CPTF_Mn         | 167908.3333 | 94479.99167 | 56.2687925  |
| UIJ68563.1 | SMC_family_ATPase_[Bacillus_cereus]                                | CPTF_Ni         | 72975.9     | 66338.10941 | 90.9041333  |
| UIJ68563.1 | SMC_family_ATPase_[Bacillus_cereus]                                | CPTF_U          | 76773.23333 | 72408.39695 | 94.31463781 |
| UIJ68563.1 | SMC_family_ATPase_[Bacillus_cereus]                                | CPTF_metals_mix | 145506.1667 | 82072.66822 | 56.40494152 |
| UIJ68563.1 | SMC_family_ATPase_[Bacillus_cereus]                                | CPTF_zcontrol   | 128514.6667 | 17424.28249 | 13.55820541 |
| UIJ68566.1 | YkvS_family_protein_[Bacillus_cereus]                              | CPTF_Al         | 72706.66667 | 125931.6407 | 173.2050808 |
| UIJ68566.1 | YkvS_family_protein_[Bacillus_cereus]                              | CPTF_Cd         | 291315.6667 | 52720.09365 | 18.09723941 |
| UIJ68566.1 | YkvS_family_protein_[Bacillus_cereus]                              | CPTF_Co         | 130784.3333 | 132559.8096 | 101.3575604 |
| UIJ68566.1 | YkvS_family_protein_[Bacillus_cereus]                              | CPTF_Cu         | 0           | 0           | 0           |
| UIJ68566.1 | YkvS_family_protein_[Bacillus_cereus]                              | CPTF_Fe         | 121276.9333 | 137962.7961 | 113.7584802 |
| UIJ68566.1 | YkvS_family_protein_[Bacillus_cereus]                              | CPTF_Mn         | 75344.33333 | 130500.2134 | 173.2050808 |
| UIJ68566.1 | YkvS_family_protein_[Bacillus_cereus]                              | CPTF_Ni         | 0           | 0           | 0           |
| UIJ68566.1 | YkvS_family_protein_[Bacillus_cereus]                              | CPTF_U          | 0           | 0           | 0           |
| UIJ68566.1 | YkvS_family_protein_[Bacillus_cereus]                              | CPTF_metals_mix | 454111.3333 | 15536.41671 | 3.421279227 |
| UIJ68566.1 | YkvS_family_protein_[Bacillus_cereus]                              | CPTF_zcontrol   | 0           | 0           | 0           |
| UIJ68570.1 | isochorismate_synthase_DhbC_[Bacillus_cereus]                      | CPTF_Al         | 0           | 0           | 0           |
| UIJ68570.1 | isochorismate_synthase_DhbC_[Bacillus_cereus]                      | CPTF_Cd         | 0           | 0           | 0           |
| UIJ68570.1 | isochorismate_synthase_DhbC_[Bacillus_cereus]                      | CPTF_Co         | 0           | 0           | 0           |
| UIJ68570.1 | isochorismate_synthase_DhbC_[Bacillus_cereus]                      | CPTF_Cu         | 10464.66667 | 18125.33435 | 173.2050808 |
| UIJ68570.1 | isochorismate_synthase_DhbC_[Bacillus_cereus]                      | CPTF_Fe         | 0           | 0           | 0           |
| UIJ68570.1 | isochorismate_synthase_DhbC_[Bacillus_cereus]                      | CPTF_Mn         | 0           | 0           | 0           |
| UIJ68570.1 | isochorismate_synthase_DhbC_[Bacillus_cereus]                      | CPTF_Ni         | 0           | 0           | 0           |
| UIJ68570.1 | isochorismate_synthase_DhbC_[Bacillus_cereus]                      | CPTF_U          | 0           | 0           | 0           |
| UIJ68570.1 | isochorismate_synthase_DhbC_[Bacillus_cereus]                      | CPTF_metals_mix | 110590.3333 | 26197.63662 | 23.68890284 |
| UIJ68570.1 | isochorismate_synthase_DhbC_[Bacillus_cereus]                      | CPTF_zcontrol   | 0           | 0           | 0           |
| UIJ68571.1 | (2,3-dihydroxybenzoyl)adenylate_synthase_[Bacillus_cereus]         | CPTF_Al         | 0           | 0           | 0           |
| UIJ68571.1 | (2,3-dihydroxybenzoyl)adenylate_synthase_[Bacillus_cereus]         | CPTF_Cd         | 0           | 0           | 0           |
| UIJ68571.1 | (2,3-dihydroxybenzoyl)adenylate_synthase_[Bacillus_cereus]         | CPTF_Co         | 0           | 0           | 0           |
| UIJ68571.1 | (2,3-dihydroxybenzoyl)adenylate_synthase_[Bacillus_cereus]         | CPTF_Cu         | 0           | 0           | 0           |
| UIJ68571.1 | (2,3-dihydroxybenzoyl)adenylate_synthase_[Bacillus_cereus]         | CPTF_Fe         | 0           | 0           | 0           |
| UIJ68571.1 | (2,3-dihydroxybenzoyl)adenylate_synthase_[Bacillus_cereus]         | CPTF_Mn         | 0           | 0           | 0           |
| UIJ68571.1 | (2,3-dihydroxybenzoyl)adenylate_synthase_[Bacillus_cereus]         | CPTF_Ni         | 0           | 0           | 0           |
| UIJ68571.1 | (2,3-dihydroxybenzoyl)adenylate_synthase_[Bacillus_cereus]         | CPTF_U          | 0           | 0           | 0           |
| UIJ68571.1 | (2,3-dihydroxybenzoyl)adenylate_synthase_[Bacillus_cereus]         | CPTF_metals_mix | 90560.63333 | 32986.44841 | 36.42471038 |
| UIJ68571.1 | (2,3-dihydroxybenzoyl)adenylate_synthase_[Bacillus_cereus]         | CPTF_zcontrol   | 0           | 0           | 0           |
| UIJ68572.1 | isochorismatase_family_protein_[Bacillus_cereus]                   | CPTF_Al         | 0           | 0           | 0           |
| UIJ68572.1 | isochorismatase_family_protein_[Bacillus_cereus]                   | CPTF_Cd         | 0           | 0           | 0           |
| UIJ68572.1 | isochorismatase_family_protein_[Bacillus_cereus]                   | CPTF_Co         | 0           | 0           | 0           |
| UIJ68572.1 | isochorismatase_family_protein_[Bacillus_cereus]                   | CPTF_Cu         | 63294.83333 | 60438.60436 | 95.4874216  |
| UIJ68572.1 | isochorismatase_family_protein_[Bacillus_cereus]                   | CPTF_Fe         | 0           | 0           | 0           |
| UIJ68572.1 | isochorismatase_family_protein_[Bacillus_cereus]                   | CPTF_Mn         | 0           | 0           | 0           |
| UIJ68572.1 | isochorismatase_family_protein_[Bacillus_cereus]                   | CPTF_Ni         | 0           | 0           | 0           |
| UIJ68572.1 | isochorismatase_family_protein_[Bacillus_cereus]                   | CPTF_U          | 0           | 0           | 0           |
| UIJ68572.1 | isochorismatase_family_protein_[Bacillus_cereus]                   | CPTF_metals_mix | 777629      | 64817.83887 | 8.335316568 |
| UIJ68572.1 | isochorismatase_family_protein_[Bacillus_cereus]                   | CPTF_zcontrol   | 0           | 0           | 0           |
| UIJ68573.1 | amino_acid_adenylation_domain-containing_protein_[Bacillus_cereus] | CPTF_Al         | 0           | 0           | 0           |
| UIJ68573.1 | amino_acid_adenylation_domain-containing_protein_[Bacillus_cereus] | CPTF_Cd         | 0           | 0           | 0           |
| UIJ68573.1 | amino_acid_adenylation_domain-containing_protein_[Bacillus_cereus] | CPTF_Co         | 0           | 0           | 0           |
| UIJ68573.1 | amino_acid_adenylation_domain-containing_protein_[Bacillus_cereus] | CPTF_Cu         | 100859.8667 | 12614.17407 | 12.5066337  |
| UIJ68573.1 | amino_acid_adenylation_domain-containing_protein_[Bacillus_cereus] | CPTF_Fe         | 0           | 0           | 0           |
| UIJ68573.1 | amino_acid_adenylation_domain-containing_protein_[Bacillus_cereus] | CPTF_Mn         | 0           | 0           | 0           |
| UIJ68573.1 | amino_acid_adenylation_domain-containing_protein_[Bacillus_cereus] | CPTF_Ni         | 0           | 0           | 0           |
| UIJ68573.1 | amino_acid_adenylation_domain-containing_protein_[Bacillus_cereus] | CPTF_U          | 0           | 0           | 0           |
| UIJ68573.1 | amino_acid_adenylation_domain-containing_protein_[Bacillus_cereus] | CPTF_metals_mix | 170116      | 44716.13106 | 26.2856704  |

|            |                                                                    |                 |             |             |             |
|------------|--------------------------------------------------------------------|-----------------|-------------|-------------|-------------|
| UIJ68573.1 | amino_acid_adenylation_domain-containing_protein_[Bacillus_cereus] | CPTF_zcontrol   | 21345.96667 | 36972.2988  | 173.2050808 |
| UIJ68578.1 | HU_family_DNA-binding_protein_[Bacillus_cereus]                    | CPTF_Al         | 855138      | 66364.07719 | 7.76062778  |
| UIJ68578.1 | HU_family_DNA-binding_protein_[Bacillus_cereus]                    | CPTF_Cd         | 963101      | 87302.09375 | 9.064687644 |
| UIJ68578.1 | HU_family_DNA-binding_protein_[Bacillus_cereus]                    | CPTF_Co         | 991507      | 33588.419   | 3.387612896 |
| UIJ68578.1 | HU_family_DNA-binding_protein_[Bacillus_cereus]                    | CPTF_Cu         | 926164.3333 | 101068.0906 | 10.91254402 |
| UIJ68578.1 | HU_family_DNA-binding_protein_[Bacillus_cereus]                    | CPTF_Fe         | 837837.6667 | 116143.3356 | 13.86227192 |
| UIJ68578.1 | HU_family_DNA-binding_protein_[Bacillus_cereus]                    | CPTF_Mn         | 968657      | 485569.5919 | 50.12812501 |
| UIJ68578.1 | HU_family_DNA-binding_protein_[Bacillus_cereus]                    | CPTF_Ni         | 902756.3333 | 233227.369  | 25.83502994 |
| UIJ68578.1 | HU_family_DNA-binding_protein_[Bacillus_cereus]                    | CPTF_U          | 555130      | 67561.94578 | 12.17047282 |
| UIJ68578.1 | HU_family_DNA-binding_protein_[Bacillus_cereus]                    | CPTF_metals_mix | 946901.3333 | 87252.64497 | 9.214544525 |
| UIJ68578.1 | HU_family_DNA-binding_protein_[Bacillus_cereus]                    | CPTF_zcontrol   | 811927.3333 | 36333.83905 | 4.475011194 |
| UIJ68586.1 | 23S_rRNA_pseudouridine(2604)_synthase_RluF_[Bacillus_cereus]       | CPTF_Al         | 88809.46667 | 23915.43874 | 26.92892958 |
| UIJ68586.1 | 23S_rRNA_pseudouridine(2604)_synthase_RluF_[Bacillus_cereus]       | CPTF_Cd         | 75090.66667 | 20807.67745 | 27.71007154 |
| UIJ68586.1 | 23S_rRNA_pseudouridine(2604)_synthase_RluF_[Bacillus_cereus]       | CPTF_Co         | 84802.9     | 55742.66653 | 65.73202865 |
| UIJ68586.1 | 23S_rRNA_pseudouridine(2604)_synthase_RluF_[Bacillus_cereus]       | CPTF_Cu         | 131024.1333 | 59469.53395 | 45.38822921 |
| UIJ68586.1 | 23S_rRNA_pseudouridine(2604)_synthase_RluF_[Bacillus_cereus]       | CPTF_Fe         | 76755.96667 | 16826.55433 | 21.92214503 |
| UIJ68586.1 | 23S_rRNA_pseudouridine(2604)_synthase_RluF_[Bacillus_cereus]       | CPTF_Mn         | 59724.63333 | 11176.32298 | 18.71308764 |
| UIJ68586.1 | 23S_rRNA_pseudouridine(2604)_synthase_RluF_[Bacillus_cereus]       | CPTF_Ni         | 65705.13333 | 56904.18688 | 86.60538986 |
| UIJ68586.1 | 23S_rRNA_pseudouridine(2604)_synthase_RluF_[Bacillus_cereus]       | CPTF_U          | 65638.4     | 16877.33513 | 25.71259374 |
| UIJ68586.1 | 23S_rRNA_pseudouridine(2604)_synthase_RluF_[Bacillus_cereus]       | CPTF_metals_mix | 157755.1333 | 24873.48427 | 15.76714731 |
| UIJ68586.1 | 23S_rRNA_pseudouridine(2604)_synthase_RluF_[Bacillus_cereus]       | CPTF_zcontrol   | 102960.1667 | 26541.48849 | 25.77840475 |
| UIJ68587.1 | threonine--tRNA_ligase_[Bacillus_cereus]                           | CPTF_Al         | 76509.3     | 17536.34483 | 22.92054016 |
| UIJ68587.1 | threonine--tRNA_ligase_[Bacillus_cereus]                           | CPTF_Cd         | 89822.2     | 43623.30696 | 48.56628647 |
| UIJ68587.1 | threonine--tRNA_ligase_[Bacillus_cereus]                           | CPTF_Co         | 76367.2     | 28584.65184 | 37.43053542 |
| UIJ68587.1 | threonine--tRNA_ligase_[Bacillus_cereus]                           | CPTF_Cu         | 100976.8667 | 80420.36238 | 79.64236268 |
| UIJ68587.1 | threonine--tRNA_ligase_[Bacillus_cereus]                           | CPTF_Fe         | 117461.2    | 61860.40653 | 52.664545   |
| UIJ68587.1 | threonine--tRNA_ligase_[Bacillus_cereus]                           | CPTF_Mn         | 93875.5     | 57749.06965 | 61.51665733 |
| UIJ68587.1 | threonine--tRNA_ligase_[Bacillus_cereus]                           | CPTF_Ni         | 104731.2667 | 96950.03968 | 92.5702923  |
| UIJ68587.1 | threonine--tRNA_ligase_[Bacillus_cereus]                           | CPTF_U          | 80471.46667 | 97444.42073 | 121.091891  |
| UIJ68587.1 | threonine--tRNA_ligase_[Bacillus_cereus]                           | CPTF_metals_mix | 0           | 0           | 0           |
| UIJ68587.1 | threonine--tRNA_ligase_[Bacillus_cereus]                           | CPTF_zcontrol   | 77183.33333 | 39714.13005 | 51.45428208 |
| UIJ68604.1 | GNAT_family_N-acetyltransferase_[Bacillus_cereus]                  | CPTF_Al         | 0           | 0           | 0           |
| UIJ68604.1 | GNAT_family_N-acetyltransferase_[Bacillus_cereus]                  | CPTF_Cd         | 0           | 0           | 0           |
| UIJ68604.1 | GNAT_family_N-acetyltransferase_[Bacillus_cereus]                  | CPTF_Co         | 0           | 0           | 0           |
| UIJ68604.1 | GNAT_family_N-acetyltransferase_[Bacillus_cereus]                  | CPTF_Cu         | 0           | 0           | 0           |
| UIJ68604.1 | GNAT_family_N-acetyltransferase_[Bacillus_cereus]                  | CPTF_Fe         | 0           | 0           | 0           |
| UIJ68604.1 | GNAT_family_N-acetyltransferase_[Bacillus_cereus]                  | CPTF_Mn         | 0           | 0           | 0           |
| UIJ68604.1 | GNAT_family_N-acetyltransferase_[Bacillus_cereus]                  | CPTF_Ni         | 0           | 0           | 0           |
| UIJ68604.1 | GNAT_family_N-acetyltransferase_[Bacillus_cereus]                  | CPTF_U          | 0           | 0           | 0           |
| UIJ68604.1 | GNAT_family_N-acetyltransferase_[Bacillus_cereus]                  | CPTF_metals_mix | 379456      | 12217.61892 | 3.219772231 |
| UIJ68604.1 | GNAT_family_N-acetyltransferase_[Bacillus_cereus]                  | CPTF_zcontrol   | 0           | 0           | 0           |
| UIJ68609.1 | protoporphyrinogen_oxidase_[Bacillus_cereus]                       | CPTF_Al         | 267213.0333 | 41462.62294 | 15.51669184 |
| UIJ68609.1 | protoporphyrinogen_oxidase_[Bacillus_cereus]                       | CPTF_Cd         | 149729.1333 | 85884.59355 | 57.35997507 |
| UIJ68609.1 | protoporphyrinogen_oxidase_[Bacillus_cereus]                       | CPTF_Co         | 332092.4    | 49622.57151 | 14.94239902 |
| UIJ68609.1 | protoporphyrinogen_oxidase_[Bacillus_cereus]                       | CPTF_Cu         | 387261.3333 | 39183.68615 | 10.11815092 |
| UIJ68609.1 | protoporphyrinogen_oxidase_[Bacillus_cereus]                       | CPTF_Fe         | 217343.6667 | 96037.40201 | 44.18688774 |
| UIJ68609.1 | protoporphyrinogen_oxidase_[Bacillus_cereus]                       | CPTF_Mn         | 165161      | 55091.14986 | 33.35602828 |
| UIJ68609.1 | protoporphyrinogen_oxidase_[Bacillus_cereus]                       | CPTF_Ni         | 203673.9333 | 96656.86515 | 47.45666938 |
| UIJ68609.1 | protoporphyrinogen_oxidase_[Bacillus_cereus]                       | CPTF_U          | 162223.2    | 116404.9975 | 71.75607279 |
| UIJ68609.1 | protoporphyrinogen_oxidase_[Bacillus_cereus]                       | CPTF_metals_mix | 558743.6    | 106988.9209 | 19.14812463 |
| UIJ68609.1 | protoporphyrinogen_oxidase_[Bacillus_cereus]                       | CPTF_zcontrol   | 183399.0333 | 25911.6784  | 14.12857959 |
| UIJ68613.1 | cold-shock_protein_CspD_[Bacillus_cereus]                          | CPTF_Al         | 557060.5333 | 94750.55809 | 17.00902369 |
| UIJ68613.1 | cold-shock_protein_CspD_[Bacillus_cereus]                          | CPTF_Cd         | 1018535.2   | 230901.2182 | 22.66993013 |
| UIJ68613.1 | cold-shock_protein_CspD_[Bacillus_cereus]                          | CPTF_Co         | 864266.7    | 154244.1018 | 17.84681763 |
| UIJ68613.1 | cold-shock_protein_CspD_[Bacillus_cereus]                          | CPTF_Cu         | 779004      | 79038.13282 | 10.14604968 |
| UIJ68613.1 | cold-shock_protein_CspD_[Bacillus_cereus]                          | CPTF_Fe         | 812079.5333 | 327742.694  | 40.35844773 |
| UIJ68613.1 | cold-shock_protein_CspD_[Bacillus_cereus]                          | CPTF_Mn         | 631853.0667 | 447434.4592 | 70.81305494 |
| UIJ68613.1 | cold-shock_protein_CspD_[Bacillus_cereus]                          | CPTF_Ni         | 429927.3333 | 222576.0859 | 51.77062928 |
| UIJ68613.1 | cold-shock_protein_CspD_[Bacillus_cereus]                          | CPTF_U          | 602087.3333 | 224307.4553 | 37.25496998 |
| UIJ68613.1 | cold-shock_protein_CspD_[Bacillus_cereus]                          | CPTF_metals_mix | 1055788.267 | 128291.9682 | 12.15129702 |
| UIJ68613.1 | cold-shock_protein_CspD_[Bacillus_cereus]                          | CPTF_zcontrol   | 304741.4667 | 68323.52377 | 22.42015979 |

|            |                                                           |                 |             |             |             |
|------------|-----------------------------------------------------------|-----------------|-------------|-------------|-------------|
| UIJ68615.1 | ATP-binding_protein_[Bacillus_cereus]                     | CPTF_AI         | 859787.6667 | 53450.92629 | 6.2167589   |
| UIJ68615.1 | ATP-binding_protein_[Bacillus_cereus]                     | CPTF_Cd         | 818452.3333 | 36013.00211 | 4.400134333 |
| UIJ68615.1 | ATP-binding_protein_[Bacillus_cereus]                     | CPTF_Co         | 834207      | 43628.75167 | 5.229967103 |
| UIJ68615.1 | ATP-binding_protein_[Bacillus_cereus]                     | CPTF_Cu         | 831242.6667 | 72166.46246 | 8.681756286 |
| UIJ68615.1 | ATP-binding_protein_[Bacillus_cereus]                     | CPTF_Fe         | 845597      | 32774.38317 | 3.875886878 |
| UIJ68615.1 | ATP-binding_protein_[Bacillus_cereus]                     | CPTF_Mn         | 773891.3333 | 162788.1486 | 21.03501378 |
| UIJ68615.1 | ATP-binding_protein_[Bacillus_cereus]                     | CPTF_Ni         | 883408      | 122092.2644 | 13.82059755 |
| UIJ68615.1 | ATP-binding_protein_[Bacillus_cereus]                     | CPTF_U          | 858694.3333 | 33380.96476 | 3.887409462 |
| UIJ68615.1 | ATP-binding_protein_[Bacillus_cereus]                     | CPTF_metals_mix | 0           | 0           | 0           |
| UIJ68615.1 | ATP-binding_protein_[Bacillus_cereus]                     | CPTF_zcontrol   | 899680      | 82321.0682  | 9.150038702 |
| UIJ68623.1 | GNAT_family_N-acetyltransferase_[Bacillus_cereus]         | CPTF_AI         | 12348.53333 | 21388.28713 | 173.2050808 |
| UIJ68623.1 | GNAT_family_N-acetyltransferase_[Bacillus_cereus]         | CPTF_Cd         | 10971.76667 | 19003.65732 | 173.2050808 |
| UIJ68623.1 | GNAT_family_N-acetyltransferase_[Bacillus_cereus]         | CPTF_Co         | 21248.3     | 18504.04664 | 87.08483335 |
| UIJ68623.1 | GNAT_family_N-acetyltransferase_[Bacillus_cereus]         | CPTF_Cu         | 19863.23333 | 17215.09007 | 86.6681158  |
| UIJ68623.1 | GNAT_family_N-acetyltransferase_[Bacillus_cereus]         | CPTF_Fe         | 0           | 0           | 0           |
| UIJ68623.1 | GNAT_family_N-acetyltransferase_[Bacillus_cereus]         | CPTF_Mn         | 0           | 0           | 0           |
| UIJ68623.1 | GNAT_family_N-acetyltransferase_[Bacillus_cereus]         | CPTF_Ni         | 9494.333333 | 16444.66772 | 173.2050808 |
| UIJ68623.1 | GNAT_family_N-acetyltransferase_[Bacillus_cereus]         | CPTF_U          | 0           | 0           | 0           |
| UIJ68623.1 | GNAT_family_N-acetyltransferase_[Bacillus_cereus]         | CPTF_metals_mix | 31556.03333 | 30547.37608 | 96.80359935 |
| UIJ68623.1 | GNAT_family_N-acetyltransferase_[Bacillus_cereus]         | CPTF_zcontrol   | 0           | 0           | 0           |
| UIJ68630.1 | DUF5519_family_protein_[Bacillus_cereus]                  | CPTF_AI         | 266375.3333 | 183930.1457 | 69.04924092 |
| UIJ68630.1 | DUF5519_family_protein_[Bacillus_cereus]                  | CPTF_Cd         | 93336.2     | 105493.6346 | 113.0254227 |
| UIJ68630.1 | DUF5519_family_protein_[Bacillus_cereus]                  | CPTF_Co         | 183955.2    | 139552.8606 | 75.86241685 |
| UIJ68630.1 | DUF5519_family_protein_[Bacillus_cereus]                  | CPTF_Cu         | 315360.3    | 92146.62523 | 29.21947538 |
| UIJ68630.1 | DUF5519_family_protein_[Bacillus_cereus]                  | CPTF_Fe         | 139507.5333 | 67477.54774 | 48.36838995 |
| UIJ68630.1 | DUF5519_family_protein_[Bacillus_cereus]                  | CPTF_Mn         | 138031.4333 | 161156.6547 | 116.7535907 |
| UIJ68630.1 | DUF5519_family_protein_[Bacillus_cereus]                  | CPTF_Ni         | 123927.4333 | 46472.64058 | 37.49988145 |
| UIJ68630.1 | DUF5519_family_protein_[Bacillus_cereus]                  | CPTF_U          | 22913.83333 | 39687.92353 | 173.2050808 |
| UIJ68630.1 | DUF5519_family_protein_[Bacillus_cereus]                  | CPTF_metals_mix | 809718.7667 | 192611.3128 | 23.78743346 |
| UIJ68630.1 | DUF5519_family_protein_[Bacillus_cereus]                  | CPTF_zcontrol   | 77882.56667 | 62770.4908  | 80.59633046 |
| UIJ68634.1 | class_I_SAM-dependent_methyltransferase_[Bacillus_cereus] | CPTF_AI         | 236649      | 22964.13946 | 9.703881891 |
| UIJ68634.1 | class_I_SAM-dependent_methyltransferase_[Bacillus_cereus] | CPTF_Cd         | 250682.6333 | 41530.36285 | 16.56690864 |
| UIJ68634.1 | class_I_SAM-dependent_methyltransferase_[Bacillus_cereus] | CPTF_Co         | 154539.5667 | 82635.50831 | 53.47207197 |
| UIJ68634.1 | class_I_SAM-dependent_methyltransferase_[Bacillus_cereus] | CPTF_Cu         | 181990.6667 | 27046.82285 | 14.86165381 |
| UIJ68634.1 | class_I_SAM-dependent_methyltransferase_[Bacillus_cereus] | CPTF_Fe         | 245708.7333 | 20063.43365 | 8.165535418 |
| UIJ68634.1 | class_I_SAM-dependent_methyltransferase_[Bacillus_cereus] | CPTF_Mn         | 218777.6667 | 58420.424   | 26.70310224 |
| UIJ68634.1 | class_I_SAM-dependent_methyltransferase_[Bacillus_cereus] | CPTF_Ni         | 107644.8667 | 8066.241916 | 7.493382793 |
| UIJ68634.1 | class_I_SAM-dependent_methyltransferase_[Bacillus_cereus] | CPTF_U          | 117844.3333 | 65020.44261 | 55.17485718 |
| UIJ68634.1 | class_I_SAM-dependent_methyltransferase_[Bacillus_cereus] | CPTF_metals_mix | 716935.3333 | 92873.36561 | 12.95421795 |
| UIJ68634.1 | class_I_SAM-dependent_methyltransferase_[Bacillus_cereus] | CPTF_zcontrol   | 178798.3333 | 57267.24322 | 32.02895808 |
| UIJ68635.1 | toxic_anion_resistance_protein_[Bacillus_cereus]          | CPTF_AI         | 1795246.967 | 71189.21234 | 3.965427246 |
| UIJ68635.1 | toxic_anion_resistance_protein_[Bacillus_cereus]          | CPTF_Cd         | 1675498.9   | 59642.8917  | 3.559709392 |
| UIJ68635.1 | toxic_anion_resistance_protein_[Bacillus_cereus]          | CPTF_Co         | 1651839.433 | 71467.86173 | 4.326562273 |
| UIJ68635.1 | toxic_anion_resistance_protein_[Bacillus_cereus]          | CPTF_Cu         | 1851748.067 | 137103.7919 | 7.404019716 |
| UIJ68635.1 | toxic_anion_resistance_protein_[Bacillus_cereus]          | CPTF_Fe         | 1695422.867 | 67094.82391 | 3.957409401 |
| UIJ68635.1 | toxic_anion_resistance_protein_[Bacillus_cereus]          | CPTF_Mn         | 1784479.7   | 100174.0891 | 5.613630075 |
| UIJ68635.1 | toxic_anion_resistance_protein_[Bacillus_cereus]          | CPTF_Ni         | 1841486.333 | 157766.7715 | 8.567360432 |
| UIJ68635.1 | toxic_anion_resistance_protein_[Bacillus_cereus]          | CPTF_U          | 1836437     | 50709.4932  | 2.761297731 |
| UIJ68635.1 | toxic_anion_resistance_protein_[Bacillus_cereus]          | CPTF_metals_mix | 2227245.867 | 226433.8055 | 10.16653837 |
| UIJ68635.1 | toxic_anion_resistance_protein_[Bacillus_cereus]          | CPTF_zcontrol   | 1863481.233 | 19111.26444 | 1.025567851 |
| UIJ68650.1 | DEAD/DEAH_box_helicase_[Bacillus_cereus]                  | CPTF_AI         | 8058.9      | 13958.42425 | 173.2050808 |
| UIJ68650.1 | DEAD/DEAH_box_helicase_[Bacillus_cereus]                  | CPTF_Cd         | 0           | 0           | 0           |
| UIJ68650.1 | DEAD/DEAH_box_helicase_[Bacillus_cereus]                  | CPTF_Co         | 0           | 0           | 0           |
| UIJ68650.1 | DEAD/DEAH_box_helicase_[Bacillus_cereus]                  | CPTF_Cu         | 0           | 0           | 0           |
| UIJ68650.1 | DEAD/DEAH_box_helicase_[Bacillus_cereus]                  | CPTF_Fe         | 99086.9     | 171623.5452 | 173.2050808 |
| UIJ68650.1 | DEAD/DEAH_box_helicase_[Bacillus_cereus]                  | CPTF_Mn         | 74057.66667 | 128271.6414 | 173.2050808 |
| UIJ68650.1 | DEAD/DEAH_box_helicase_[Bacillus_cereus]                  | CPTF_Ni         | 0           | 0           | 0           |
| UIJ68650.1 | DEAD/DEAH_box_helicase_[Bacillus_cereus]                  | CPTF_U          | 0           | 0           | 0           |
| UIJ68650.1 | DEAD/DEAH_box_helicase_[Bacillus_cereus]                  | CPTF_metals_mix | 16991.36667 | 19464.63218 | 114.5560128 |
| UIJ68650.1 | DEAD/DEAH_box_helicase_[Bacillus_cereus]                  | CPTF_zcontrol   | 0           | 0           | 0           |
| UIJ68655.1 | VOC_family_protein_[Bacillus_cereus]                      | CPTF_AI         | 0           | 0           | 0           |

|            |                                                                            |                 |             |             |              |
|------------|----------------------------------------------------------------------------|-----------------|-------------|-------------|--------------|
| UIJ68655.1 | VOC_family_protein [Bacillus cereus]                                       | CPTF_Cd         | 13888.16667 | 24055.01029 | 173.2050808  |
| UIJ68655.1 | VOC_family_protein [Bacillus cereus]                                       | CPTF_Co         | 0           | 0           | 0            |
| UIJ68655.1 | VOC_family_protein [Bacillus cereus]                                       | CPTF_Cu         | 0           | 0           | 0            |
| UIJ68655.1 | VOC_family_protein [Bacillus cereus]                                       | CPTF_Fe         | 0           | 0           | 0            |
| UIJ68655.1 | VOC_family_protein [Bacillus cereus]                                       | CPTF_Mn         | 0           | 0           | 0            |
| UIJ68655.1 | VOC_family_protein [Bacillus cereus]                                       | CPTF_Ni         | 0           | 0           | 0            |
| UIJ68655.1 | VOC_family_protein [Bacillus cereus]                                       | CPTF_U          | 0           | 0           | 0            |
| UIJ68655.1 | VOC_family_protein [Bacillus cereus]                                       | CPTF_metals_mix | 11883.03333 | 20582.01748 | 173.2050808  |
| UIJ68655.1 | VOC_family_protein [Bacillus cereus]                                       | CPTF_zcontrol   | 0           | 0           | 0            |
| UIJ68659.1 | 2,3-diphosphoglycerate-dependent_phosphoglycerate_mutase [Bacillus cereus] | CPTF_AI         | 581508.1333 | 206150.9458 | 35.45108554  |
| UIJ68659.1 | 2,3-diphosphoglycerate-dependent_phosphoglycerate_mutase [Bacillus cereus] | CPTF_Cd         | 392823.8667 | 175962.1312 | 44.79415488  |
| UIJ68659.1 | 2,3-diphosphoglycerate-dependent_phosphoglycerate_mutase [Bacillus cereus] | CPTF_Co         | 302704.4    | 40533.9095  | 13.39059145  |
| UIJ68659.1 | 2,3-diphosphoglycerate-dependent_phosphoglycerate_mutase [Bacillus cereus] | CPTF_Cu         | 371923.4333 | 28431.34377 | 7.644407752  |
| UIJ68659.1 | 2,3-diphosphoglycerate-dependent_phosphoglycerate_mutase [Bacillus cereus] | CPTF_Fe         | 521446.7667 | 181264.1659 | 34.7617777   |
| UIJ68659.1 | 2,3-diphosphoglycerate-dependent_phosphoglycerate_mutase [Bacillus cereus] | CPTF_Mn         | 366120.9667 | 230205.1566 | 62.87680236  |
| UIJ68659.1 | 2,3-diphosphoglycerate-dependent_phosphoglycerate_mutase [Bacillus cereus] | CPTF_Ni         | 576621.2    | 127102.6585 | 22.04266137  |
| UIJ68659.1 | 2,3-diphosphoglycerate-dependent_phosphoglycerate_mutase [Bacillus cereus] | CPTF_U          | 285099.3667 | 274495.6025 | 96.28067774  |
| UIJ68659.1 | 2,3-diphosphoglycerate-dependent_phosphoglycerate_mutase [Bacillus cereus] | CPTF_metals_mix | 284771.5    | 30751.72506 | 10.7987369   |
| UIJ68659.1 | 2,3-diphosphoglycerate-dependent_phosphoglycerate_mutase [Bacillus cereus] | CPTF_zcontrol   | 412136.2    | 321622.1157 | 78.03782238  |
| UIJ68664.1 | beta-Ala-His_dipeptidase [Bacillus cereus]                                 | CPTF_AI         | 3714890.733 | 419349.1823 | 11.28833154  |
| UIJ68664.1 | beta-Ala-His_dipeptidase [Bacillus cereus]                                 | CPTF_Cd         | 3703869.933 | 529810.0314 | 14.30422885  |
| UIJ68664.1 | beta-Ala-His_dipeptidase [Bacillus cereus]                                 | CPTF_Co         | 3425918.467 | 625002.7714 | 18.24336386  |
| UIJ68664.1 | beta-Ala-His_dipeptidase [Bacillus cereus]                                 | CPTF_Cu         | 3968166.867 | 305032.1857 | 7.686979806  |
| UIJ68664.1 | beta-Ala-His_dipeptidase [Bacillus cereus]                                 | CPTF_Fe         | 3259233.9   | 275268.2288 | 8.445795462  |
| UIJ68664.1 | beta-Ala-His_dipeptidase [Bacillus cereus]                                 | CPTF_Mn         | 2981769.633 | 623099.4272 | 20.89669737  |
| UIJ68664.1 | beta-Ala-His_dipeptidase [Bacillus cereus]                                 | CPTF_Ni         | 3161789.333 | 371700.1109 | 11.75600496  |
| UIJ68664.1 | beta-Ala-His_dipeptidase [Bacillus cereus]                                 | CPTF_U          | 2611231.267 | 140825.3663 | 5.393063729  |
| UIJ68664.1 | beta-Ala-His_dipeptidase [Bacillus cereus]                                 | CPTF_metals_mix | 3663745.8   | 297289.963  | 8.114371991  |
| UIJ68664.1 | beta-Ala-His_dipeptidase [Bacillus cereus]                                 | CPTF_zcontrol   | 2968201.567 | 199189.9848 | 6.710797104  |
| UIJ68670.1 | hypothetical_protein_LW858_10810 [Bacillus cereus]                         | CPTF_AI         | 7058.566667 | 12225.7961  | 173.2050808  |
| UIJ68670.1 | hypothetical_protein_LW858_10810 [Bacillus cereus]                         | CPTF_Cd         | 17634.4     | 15272.0992  | 86.6025461   |
| UIJ68670.1 | hypothetical_protein_LW858_10810 [Bacillus cereus]                         | CPTF_Co         | 10742.23333 | 18606.09392 | 173.2050808  |
| UIJ68670.1 | hypothetical_protein_LW858_10810 [Bacillus cereus]                         | CPTF_Cu         | 4504.566667 | 7802.138333 | 173.2050808  |
| UIJ68670.1 | hypothetical_protein_LW858_10810 [Bacillus cereus]                         | CPTF_Fe         | 0           | 0           | 0            |
| UIJ68670.1 | hypothetical_protein_LW858_10810 [Bacillus cereus]                         | CPTF_Mn         | 0           | 0           | 0            |
| UIJ68670.1 | hypothetical_protein_LW858_10810 [Bacillus cereus]                         | CPTF_Ni         | 11534.46667 | 19978.2823  | 173.2050808  |
| UIJ68670.1 | hypothetical_protein_LW858_10810 [Bacillus cereus]                         | CPTF_U          | 0           | 0           | 0            |
| UIJ68670.1 | hypothetical_protein_LW858_10810 [Bacillus cereus]                         | CPTF_metals_mix | 0           | 0           | 0            |
| UIJ68670.1 | hypothetical_protein_LW858_10810 [Bacillus cereus]                         | CPTF_zcontrol   | 0           | 0           | 0            |
| UIJ68674.1 | non-ribosomal_peptide_synthetase [Bacillus cereus]                         | CPTF_AI         | 69004.46667 | 88301.53661 | 127.9649577  |
| UIJ68674.1 | non-ribosomal_peptide_synthetase [Bacillus cereus]                         | CPTF_Cd         | 9265.033333 | 8232.930973 | 88.86024126  |
| UIJ68674.1 | non-ribosomal_peptide_synthetase [Bacillus cereus]                         | CPTF_Co         | 7961.52     | 7713.62557  | 96.88634293  |
| UIJ68674.1 | non-ribosomal_peptide_synthetase [Bacillus cereus]                         | CPTF_Cu         | 38000.33333 | 65818.50804 | 173.2050808  |
| UIJ68674.1 | non-ribosomal_peptide_synthetase [Bacillus cereus]                         | CPTF_Fe         | 35672.5     | 51823.50043 | 145.2757739  |
| UIJ68674.1 | non-ribosomal_peptide_synthetase [Bacillus cereus]                         | CPTF_Mn         | 96620.66667 | 83730.28829 | 86.65877723  |
| UIJ68674.1 | non-ribosomal_peptide_synthetase [Bacillus cereus]                         | CPTF_Ni         | 13398.83333 | 23207.4601  | 173.2050808  |
| UIJ68674.1 | non-ribosomal_peptide_synthetase [Bacillus cereus]                         | CPTF_U          | 109181.6667 | 111197.5364 | 101.8463445  |
| UIJ68674.1 | non-ribosomal_peptide_synthetase [Bacillus cereus]                         | CPTF_metals_mix | 0           | 0           | 0            |
| UIJ68674.1 | non-ribosomal_peptide_synthetase [Bacillus cereus]                         | CPTF_zcontrol   | 17154       | 18209.16201 | 106.1511135  |
| UIJ68675.1 | amino_acid_adenylation_domain-containing_protein [Bacillus cereus]         | CPTF_AI         | 336052.1333 | 146761.4315 | 43.67222133  |
| UIJ68675.1 | amino_acid_adenylation_domain-containing_protein [Bacillus cereus]         | CPTF_Cd         | 244278.8    | 50670.60739 | 20.74294101  |
| UIJ68675.1 | amino_acid_adenylation_domain-containing_protein [Bacillus cereus]         | CPTF_Co         | 296459.9    | 32006.38953 | 10.79619521  |
| UIJ68675.1 | amino_acid_adenylation_domain-containing_protein [Bacillus cereus]         | CPTF_Cu         | 144467.1333 | 87954.27104 | 60.88185528  |
| UIJ68675.1 | amino_acid_adenylation_domain-containing_protein [Bacillus cereus]         | CPTF_Fe         | 214620.7    | 49493.83528 | 23.06107252  |
| UIJ68675.1 | amino_acid_adenylation_domain-containing_protein [Bacillus cereus]         | CPTF_Mn         | 207559.8333 | 184059.1428 | 88.67763086  |
| UIJ68675.1 | amino_acid_adenylation_domain-containing_protein [Bacillus cereus]         | CPTF_Ni         | 198157.1667 | 114962.1883 | 58.015666011 |
| UIJ68675.1 | amino_acid_adenylation_domain-containing_protein [Bacillus cereus]         | CPTF_U          | 178558.0333 | 36586.41681 | 20.48993043  |
| UIJ68675.1 | amino_acid_adenylation_domain-containing_protein [Bacillus cereus]         | CPTF_metals_mix | 0           | 0           | 0            |
| UIJ68675.1 | amino_acid_adenylation_domain-containing_protein [Bacillus cereus]         | CPTF_zcontrol   | 219800.7667 | 167230.5059 | 76.08276734  |
| UIJ68698.1 | acyl-CoA_dehydrogenase [Bacillus cereus]                                   | CPTF_AI         | 1292831.667 | 110684.2338 | 8.561380163  |
| UIJ68698.1 | acyl-CoA_dehydrogenase [Bacillus cereus]                                   | CPTF_Cd         | 1298364     | 49512.70314 | 3.813468576  |

|            |                                                                              |                 |             |             |              |
|------------|------------------------------------------------------------------------------|-----------------|-------------|-------------|--------------|
| UIJ68698.1 | acyl-CoA_dehydrogenase_[Bacillus_cereus]                                     | CPTF_Co         | 1297974.333 | 88814.53941 | 6.842549743  |
| UIJ68698.1 | acyl-CoA_dehydrogenase_[Bacillus_cereus]                                     | CPTF_Cu         | 1257728.6   | 144898.286  | 11.52063219  |
| UIJ68698.1 | acyl-CoA_dehydrogenase_[Bacillus_cereus]                                     | CPTF_Fe         | 1342312.667 | 84418.37466 | 6.289024663  |
| UIJ68698.1 | acyl-CoA_dehydrogenase_[Bacillus_cereus]                                     | CPTF_Mn         | 1708743.233 | 725314.7106 | 42.44726162  |
| UIJ68698.1 | acyl-CoA_dehydrogenase_[Bacillus_cereus]                                     | CPTF_Ni         | 1121823.333 | 56404.11303 | 5.027896225  |
| UIJ68698.1 | acyl-CoA_dehydrogenase_[Bacillus_cereus]                                     | CPTF_U          | 1196511     | 331815.1169 | 27.73189022  |
| UIJ68698.1 | acyl-CoA_dehydrogenase_[Bacillus_cereus]                                     | CPTF_metals_mix | 2214779     | 206652.9887 | 9.330636992  |
| UIJ68698.1 | acyl-CoA_dehydrogenase_[Bacillus_cereus]                                     | CPTF_zcontrol   | 1293066.967 | 86015.74867 | 6.652072235  |
| UIJ68699.1 | acetyl-CoA_carboxylase_biotin_carboxylase_subunit_[Bacillus_cereus]          | CPTF_Al         | 1406655.533 | 466331.2836 | 33.15177544  |
| UIJ68699.1 | acetyl-CoA_carboxylase_biotin_carboxylase_subunit_[Bacillus_cereus]          | CPTF_Cd         | 1921060.267 | 111750.491  | 5.817125725  |
| UIJ68699.1 | acetyl-CoA_carboxylase_biotin_carboxylase_subunit_[Bacillus_cereus]          | CPTF_Co         | 1370643.2   | 568110.0816 | 41.44842958  |
| UIJ68699.1 | acetyl-CoA_carboxylase_biotin_carboxylase_subunit_[Bacillus_cereus]          | CPTF_Cu         | 1019980.133 | 80243.109   | 7.8671247    |
| UIJ68699.1 | acetyl-CoA_carboxylase_biotin_carboxylase_subunit_[Bacillus_cereus]          | CPTF_Fe         | 1563631.433 | 408358.0175 | 26.11600207  |
| UIJ68699.1 | acetyl-CoA_carboxylase_biotin_carboxylase_subunit_[Bacillus_cereus]          | CPTF_Mn         | 1235955.767 | 582041.2599 | 47.09240214  |
| UIJ68699.1 | acetyl-CoA_carboxylase_biotin_carboxylase_subunit_[Bacillus_cereus]          | CPTF_Ni         | 726739      | 202150.2315 | 27.81607035  |
| UIJ68699.1 | acetyl-CoA_carboxylase_biotin_carboxylase_subunit_[Bacillus_cereus]          | CPTF_U          | 902530.3    | 62335.30591 | 6.906727221  |
| UIJ68699.1 | acetyl-CoA_carboxylase_biotin_carboxylase_subunit_[Bacillus_cereus]          | CPTF_metals_mix | 2739534.3   | 280985.8768 | 10.25670227  |
| UIJ68699.1 | acetyl-CoA_carboxylase_biotin_carboxylase_subunit_[Bacillus_cereus]          | CPTF_zcontrol   | 933184      | 207647.9014 | 22.25154968  |
| UIJ68701.1 | hydroxymethylglutaryl-CoA_lyase_[Bacillus_cereus]                            | CPTF_Al         | 89354.83333 | 154767.1112 | 173.2050808  |
| UIJ68701.1 | hydroxymethylglutaryl-CoA_lyase_[Bacillus_cereus]                            | CPTF_Cd         | 11008.96667 | 19068.08961 | 173.2050808  |
| UIJ68701.1 | hydroxymethylglutaryl-CoA_lyase_[Bacillus_cereus]                            | CPTF_Co         | 53298.73333 | 74792.22527 | 140.3264592  |
| UIJ68701.1 | hydroxymethylglutaryl-CoA_lyase_[Bacillus_cereus]                            | CPTF_Cu         | 65421.96667 | 72154.91778 | 110.29157555 |
| UIJ68701.1 | hydroxymethylglutaryl-CoA_lyase_[Bacillus_cereus]                            | CPTF_Fe         | 16615.46667 | 28778.83246 | 173.2050808  |
| UIJ68701.1 | hydroxymethylglutaryl-CoA_lyase_[Bacillus_cereus]                            | CPTF_Mn         | 0           | 0           | 0            |
| UIJ68701.1 | hydroxymethylglutaryl-CoA_lyase_[Bacillus_cereus]                            | CPTF_Ni         | 0           | 0           | 0            |
| UIJ68701.1 | hydroxymethylglutaryl-CoA_lyase_[Bacillus_cereus]                            | CPTF_U          | 36000.9     | 62355.38792 | 173.2050808  |
| UIJ68701.1 | hydroxymethylglutaryl-CoA_lyase_[Bacillus_cereus]                            | CPTF_metals_mix | 183155.4    | 86417.18686 | 47.18244008  |
| UIJ68701.1 | hydroxymethylglutaryl-CoA_lyase_[Bacillus_cereus]                            | CPTF_zcontrol   | 17172.16667 | 29743.06514 | 173.2050808  |
| UIJ68702.1 | enoyl-CoA_hydratase_[Bacillus_cereus]                                        | CPTF_Al         | 153127.2    | 85351.672   | 55.73906666  |
| UIJ68702.1 | enoyl-CoA_hydratase_[Bacillus_cereus]                                        | CPTF_Cd         | 219918.3333 | 86158.34093 | 39.17742538  |
| UIJ68702.1 | enoyl-CoA_hydratase_[Bacillus_cereus]                                        | CPTF_Co         | 177944.8667 | 85371.01515 | 47.97610448  |
| UIJ68702.1 | enoyl-CoA_hydratase_[Bacillus_cereus]                                        | CPTF_Cu         | 94455.66667 | 83647.49062 | 88.55740854  |
| UIJ68702.1 | enoyl-CoA_hydratase_[Bacillus_cereus]                                        | CPTF_Fe         | 146257.3333 | 142032.1753 | 97.11114794  |
| UIJ68702.1 | enoyl-CoA_hydratase_[Bacillus_cereus]                                        | CPTF_Mn         | 81428.66667 | 72364.2074  | 88.86822094  |
| UIJ68702.1 | enoyl-CoA_hydratase_[Bacillus_cereus]                                        | CPTF_Ni         | 0           | 0           | 0            |
| UIJ68702.1 | enoyl-CoA_hydratase_[Bacillus_cereus]                                        | CPTF_U          | 0           | 0           | 0            |
| UIJ68702.1 | enoyl-CoA_hydratase_[Bacillus_cereus]                                        | CPTF_metals_mix | 601538.5    | 31334.5014  | 5.209060001  |
| UIJ68702.1 | enoyl-CoA_hydratase_[Bacillus_cereus]                                        | CPTF_zcontrol   | 105784.6667 | 103884.2391 | 98.20349432  |
| UIJ68703.1 | acyl-CoA_carboxylase_subunit_beta_[Bacillus_cereus]                          | CPTF_Al         | 3175706.967 | 456191.8893 | 14.36504986  |
| UIJ68703.1 | acyl-CoA_carboxylase_subunit_beta_[Bacillus_cereus]                          | CPTF_Cd         | 3367017.867 | 87207.68382 | 2.590057056  |
| UIJ68703.1 | acyl-CoA_carboxylase_subunit_beta_[Bacillus_cereus]                          | CPTF_Co         | 2672654.033 | 527113.3619 | 19.72246895  |
| UIJ68703.1 | acyl-CoA_carboxylase_subunit_beta_[Bacillus_cereus]                          | CPTF_Cu         | 2943412.867 | 293731.7381 | 9.979291095  |
| UIJ68703.1 | acyl-CoA_carboxylase_subunit_beta_[Bacillus_cereus]                          | CPTF_Fe         | 3293228     | 429907.8761 | 13.0543004   |
| UIJ68703.1 | acyl-CoA_carboxylase_subunit_beta_[Bacillus_cereus]                          | CPTF_Mn         | 2921128.1   | 193394.7949 | 6.620551659  |
| UIJ68703.1 | acyl-CoA_carboxylase_subunit_beta_[Bacillus_cereus]                          | CPTF_Ni         | 2659772.333 | 250328.8056 | 9.411662887  |
| UIJ68703.1 | acyl-CoA_carboxylase_subunit_beta_[Bacillus_cereus]                          | CPTF_U          | 2450411.667 | 697304.9115 | 28.45664347  |
| UIJ68703.1 | acyl-CoA_carboxylase_subunit_beta_[Bacillus_cereus]                          | CPTF_metals_mix | 3808775.533 | 65152.96649 | 1.710601371  |
| UIJ68703.1 | acyl-CoA_carboxylase_subunit_beta_[Bacillus_cereus]                          | CPTF_zcontrol   | 3128073.933 | 665703.3457 | 21.28157326  |
| UIJ68704.1 | AMP-binding_protein_[Bacillus_cereus]                                        | CPTF_Al         | 1409144.267 | 471401.4234 | 33.45302781  |
| UIJ68704.1 | AMP-binding_protein_[Bacillus_cereus]                                        | CPTF_Cd         | 1817365.333 | 292255.6105 | 16.08128014  |
| UIJ68704.1 | AMP-binding_protein_[Bacillus_cereus]                                        | CPTF_Co         | 1763245.8   | 389578.3672 | 22.09438793  |
| UIJ68704.1 | AMP-binding_protein_[Bacillus_cereus]                                        | CPTF_Cu         | 1578616.967 | 294002.8699 | 18.62407893  |
| UIJ68704.1 | AMP-binding_protein_[Bacillus_cereus]                                        | CPTF_Fe         | 1449004.867 | 218723.4279 | 15.09473384  |
| UIJ68704.1 | AMP-binding_protein_[Bacillus_cereus]                                        | CPTF_Mn         | 1507638.667 | 281494.0054 | 18.67118505  |
| UIJ68704.1 | AMP-binding_protein_[Bacillus_cereus]                                        | CPTF_Ni         | 1417928     | 442759.0204 | 31.22577595  |
| UIJ68704.1 | AMP-binding_protein_[Bacillus_cereus]                                        | CPTF_U          | 833821.3    | 589808.5754 | 70.73560911  |
| UIJ68704.1 | AMP-binding_protein_[Bacillus_cereus]                                        | CPTF_metals_mix | 1935113.7   | 186841.1352 | 9.655305276  |
| UIJ68704.1 | AMP-binding_protein_[Bacillus_cereus]                                        | CPTF_zcontrol   | 1256084.367 | 120172.365  | 9.567220817  |
| UIJ68731.1 | glyoxalase/bleomycin_resistance/dioxygenase_family_protein_[Bacillus_cereus] | CPTF_Al         | 925940.7667 | 75850.42269 | 8.191714354  |
| UIJ68731.1 | glyoxalase/bleomycin_resistance/dioxygenase_family_protein_[Bacillus_cereus] | CPTF_Cd         | 336209.6667 | 82059.43569 | 24.4072208   |
| UIJ68731.1 | glyoxalase/bleomycin_resistance/dioxygenase_family_protein_[Bacillus_cereus] | CPTF_Co         | 1028816.667 | 39068.24813 | 3.797396504  |



|            |                                                                              |                 |             |             |             |
|------------|------------------------------------------------------------------------------|-----------------|-------------|-------------|-------------|
| UIJ68731.1 | glyoxalase/bleomycin_resistance/dioxygenase_family_protein_[Bacillus_cereus] | CPTF_Cu         | 1349984.167 | 150223.7527 | 11.1278159  |
| UIJ68731.1 | glyoxalase/bleomycin_resistance/dioxygenase_family_protein_[Bacillus_cereus] | CPTF_Fe         | 674594.7    | 118439.5272 | 17.55713871 |
| UIJ68731.1 | glyoxalase/bleomycin_resistance/dioxygenase_family_protein_[Bacillus_cereus] | CPTF_Mn         | 553815      | 399911.0007 | 72.21021472 |
| UIJ68731.1 | glyoxalase/bleomycin_resistance/dioxygenase_family_protein_[Bacillus_cereus] | CPTF_Ni         | 922048.6667 | 285866.0156 | 31.00335438 |
| UIJ68731.1 | glyoxalase/bleomycin_resistance/dioxygenase_family_protein_[Bacillus_cereus] | CPTF_U          | 683064      | 238722.8365 | 34.9488242  |
| UIJ68731.1 | glyoxalase/bleomycin_resistance/dioxygenase_family_protein_[Bacillus_cereus] | CPTF_metals_mix | 1268428.467 | 34237.56433 | 2.699211286 |
| UIJ68731.1 | glyoxalase/bleomycin_resistance/dioxygenase_family_protein_[Bacillus_cereus] | CPTF_zcontrol   | 900481      | 127897.638  | 14.20325782 |
| UIJ68773.1 | cytochrome_P450_[Bacillus_cereus]                                            | CPTF_Al         | 334283      | 62344.55047 | 18.65023063 |
| UIJ68773.1 | cytochrome_P450_[Bacillus_cereus]                                            | CPTF_Cd         | 271359.3333 | 51434.9964  | 18.95457059 |
| UIJ68773.1 | cytochrome_P450_[Bacillus_cereus]                                            | CPTF_Co         | 352685.3333 | 209657.0903 | 59.44593396 |
| UIJ68773.1 | cytochrome_P450_[Bacillus_cereus]                                            | CPTF_Cu         | 1098218.7   | 164960.7185 | 15.02075301 |
| UIJ68773.1 | cytochrome_P450_[Bacillus_cereus]                                            | CPTF_Fe         | 214266.3333 | 18585.77796 | 8.674147576 |
| UIJ68773.1 | cytochrome_P450_[Bacillus_cereus]                                            | CPTF_Mn         | 264361.3333 | 72687.17769 | 27.49538927 |
| UIJ68773.1 | cytochrome_P450_[Bacillus_cereus]                                            | CPTF_Ni         | 328512.6667 | 40382.08981 | 12.29239963 |
| UIJ68773.1 | cytochrome_P450_[Bacillus_cereus]                                            | CPTF_U          | 279499      | 242423.0045 | 86.73483786 |
| UIJ68773.1 | cytochrome_P450_[Bacillus_cereus]                                            | CPTF_metals_mix | 1783538.433 | 338128.5451 | 18.95829878 |
| UIJ68773.1 | cytochrome_P450_[Bacillus_cereus]                                            | CPTF_zcontrol   | 295410.3333 | 111422.3748 | 37.71783254 |
| UIJ68777.1 | cytochrome_P450_[Bacillus_cereus]                                            | CPTF_Al         | 91429.33333 | 158360.2506 | 173.2050808 |
| UIJ68777.1 | cytochrome_P450_[Bacillus_cereus]                                            | CPTF_Cd         | 156926.8667 | 137370.2435 | 87.5377477  |
| UIJ68777.1 | cytochrome_P450_[Bacillus_cereus]                                            | CPTF_Co         | 193350.3333 | 168851.7483 | 87.3294322  |
| UIJ68777.1 | cytochrome_P450_[Bacillus_cereus]                                            | CPTF_Cu         | 123015.6667 | 213069.3848 | 173.2050808 |
| UIJ68777.1 | cytochrome_P450_[Bacillus_cereus]                                            | CPTF_Fe         | 306505.3333 | 47384.2133  | 15.45950695 |
| UIJ68777.1 | cytochrome_P450_[Bacillus_cereus]                                            | CPTF_Mn         | 66363       | 114944.0877 | 173.2050808 |
| UIJ68777.1 | cytochrome_P450_[Bacillus_cereus]                                            | CPTF_Ni         | 317369      | 274900.857  | 86.61868582 |
| UIJ68777.1 | cytochrome_P450_[Bacillus_cereus]                                            | CPTF_U          | 103490      | 179249.9381 | 173.2050808 |
| UIJ68777.1 | cytochrome_P450_[Bacillus_cereus]                                            | CPTF_metals_mix | 0           | 0           | 0           |
| UIJ68777.1 | cytochrome_P450_[Bacillus_cereus]                                            | CPTF_zcontrol   | 76555.66667 | 132598.3043 | 173.2050808 |
| UIJ68794.1 | penicillin-binding_protein_[Bacillus_cereus]                                 | CPTF_Al         | 33597.33333 | 58192.28833 | 173.2050808 |
| UIJ68794.1 | penicillin-binding_protein_[Bacillus_cereus]                                 | CPTF_Cd         | 37876.66667 | 65604.31109 | 173.2050808 |
| UIJ68794.1 | penicillin-binding_protein_[Bacillus_cereus]                                 | CPTF_Co         | 56385.33333 | 97662.26214 | 173.2050808 |
| UIJ68794.1 | penicillin-binding_protein_[Bacillus_cereus]                                 | CPTF_Cu         | 0           | 0           | 0           |
| UIJ68794.1 | penicillin-binding_protein_[Bacillus_cereus]                                 | CPTF_Fe         | 52673.66667 | 91233.46689 | 173.2050808 |
| UIJ68794.1 | penicillin-binding_protein_[Bacillus_cereus]                                 | CPTF_Mn         | 23151.6     | 40099.74748 | 173.2050808 |
| UIJ68794.1 | penicillin-binding_protein_[Bacillus_cereus]                                 | CPTF_Ni         | 0           | 0           | 0           |
| UIJ68794.1 | penicillin-binding_protein_[Bacillus_cereus]                                 | CPTF_U          | 0           | 0           | 0           |
| UIJ68794.1 | penicillin-binding_protein_[Bacillus_cereus]                                 | CPTF_metals_mix | 0           | 0           | 0           |
| UIJ68794.1 | penicillin-binding_protein_[Bacillus_cereus]                                 | CPTF_zcontrol   | 18334.56667 | 31756.401   | 173.2050808 |
| UIJ68796.1 | beta-lactamase_family_protein_[Bacillus_cereus]                              | CPTF_Al         | 139909.6667 | 24830.78135 | 17.7477239  |
| UIJ68796.1 | beta-lactamase_family_protein_[Bacillus_cereus]                              | CPTF_Cd         | 108334.8333 | 25735.34055 | 23.75537005 |
| UIJ68796.1 | beta-lactamase_family_protein_[Bacillus_cereus]                              | CPTF_Co         | 130170      | 24274.34358 | 18.64818589 |
| UIJ68796.1 | beta-lactamase_family_protein_[Bacillus_cereus]                              | CPTF_Cu         | 137942.8333 | 52391.28652 | 37.98043382 |
| UIJ68796.1 | beta-lactamase_family_protein_[Bacillus_cereus]                              | CPTF_Fe         | 96358.33333 | 88216.12867 | 91.55007732 |
| UIJ68796.1 | beta-lactamase_family_protein_[Bacillus_cereus]                              | CPTF_Mn         | 95317.2     | 93190.7708  | 97.76910232 |
| UIJ68796.1 | beta-lactamase_family_protein_[Bacillus_cereus]                              | CPTF_Ni         | 126450      | 109932.8336 | 86.93778852 |
| UIJ68796.1 | beta-lactamase_family_protein_[Bacillus_cereus]                              | CPTF_U          | 101396.0333 | 26208.20948 | 25.84737156 |
| UIJ68796.1 | beta-lactamase_family_protein_[Bacillus_cereus]                              | CPTF_metals_mix | 0           | 0           | 0           |
| UIJ68796.1 | beta-lactamase_family_protein_[Bacillus_cereus]                              | CPTF_zcontrol   | 102316.8    | 44936.11697 | 43.9186106  |
| UIJ68800.1 | ester_cyclase_[Bacillus_cereus]                                              | CPTF_Al         | 697126.3667 | 313605.9356 | 44.98522208 |
| UIJ68800.1 | ester_cyclase_[Bacillus_cereus]                                              | CPTF_Cd         | 1024669.667 | 115045.6116 | 11.22758049 |
| UIJ68800.1 | ester_cyclase_[Bacillus_cereus]                                              | CPTF_Co         | 702498.3333 | 124194.7112 | 17.67900439 |
| UIJ68800.1 | ester_cyclase_[Bacillus_cereus]                                              | CPTF_Cu         | 300257.4667 | 85387.85949 | 28.43821352 |
| UIJ68800.1 | ester_cyclase_[Bacillus_cereus]                                              | CPTF_Fe         | 729042.5333 | 392042.309  | 53.77495703 |
| UIJ68800.1 | ester_cyclase_[Bacillus_cereus]                                              | CPTF_Mn         | 785915      | 122800.4235 | 15.62515329 |
| UIJ68800.1 | ester_cyclase_[Bacillus_cereus]                                              | CPTF_Ni         | 358663.3333 | 105473.0109 | 29.40724661 |
| UIJ68800.1 | ester_cyclase_[Bacillus_cereus]                                              | CPTF_U          | 462868.3333 | 289122.2301 | 62.46316918 |
| UIJ68800.1 | ester_cyclase_[Bacillus_cereus]                                              | CPTF_metals_mix | 608349.4333 | 315395.0091 | 51.84438282 |
| UIJ68800.1 | ester_cyclase_[Bacillus_cereus]                                              | CPTF_zcontrol   | 844833.6667 | 64663.69651 | 7.654015111 |
| UIJ68837.1 | nucleotide_excision_repair_endonuclease_[Bacillus_cereus]                    | CPTF_Al         | 485190.6667 | 105320.8102 | 21.70709732 |
| UIJ68837.1 | nucleotide_excision_repair_endonuclease_[Bacillus_cereus]                    | CPTF_Cd         | 566457.3333 | 100961.7299 | 17.82336002 |
| UIJ68837.1 | nucleotide_excision_repair_endonuclease_[Bacillus_cereus]                    | CPTF_Co         | 529190.6667 | 67160.93995 | 12.69125557 |
| UIJ68837.1 | nucleotide_excision_repair_endonuclease_[Bacillus_cereus]                    | CPTF_Cu         | 674994.3333 | 155995.0437 | 23.11057085 |

|            |                                                                 |                 |             |             |             |
|------------|-----------------------------------------------------------------|-----------------|-------------|-------------|-------------|
| UIJ68837.1 | nucleotide_excision_repair_endonuclease_[Bacillus_cereus]       | CPTF_Fe         | 565742      | 129509.2821 | 22.89193344 |
| UIJ68837.1 | nucleotide_excision_repair_endonuclease_[Bacillus_cereus]       | CPTF_Mn         | 384947      | 174445.7954 | 45.31683464 |
| UIJ68837.1 | nucleotide_excision_repair_endonuclease_[Bacillus_cereus]       | CPTF_Ni         | 426877.3333 | 107312.2128 | 25.13888754 |
| UIJ68837.1 | nucleotide_excision_repair_endonuclease_[Bacillus_cereus]       | CPTF_U          | 417727      | 78469.42672 | 18.7848587  |
| UIJ68837.1 | nucleotide_excision_repair_endonuclease_[Bacillus_cereus]       | CPTF_metals_mix | 445461.7333 | 34548.56502 | 7.755675165 |
| UIJ68837.1 | nucleotide_excision_repair_endonuclease_[Bacillus_cereus]       | CPTF_zcontrol   | 526420.6667 | 155459.9096 | 29.53149818 |
| UIJ68852.1 | DinB_family_protein_[Bacillus_cereus]                           | CPTF_Al         | 1543582.93  | 198656.2969 | 12.86981691 |
| UIJ68852.1 | DinB_family_protein_[Bacillus_cereus]                           | CPTF_Cd         | 1671754     | 41093.36298 | 2.458098678 |
| UIJ68852.1 | DinB_family_protein_[Bacillus_cereus]                           | CPTF_Co         | 1531733.767 | 37652.17109 | 2.458140697 |
| UIJ68852.1 | DinB_family_protein_[Bacillus_cereus]                           | CPTF_Cu         | 1446949.633 | 195098.8745 | 13.48345996 |
| UIJ68852.1 | DinB_family_protein_[Bacillus_cereus]                           | CPTF_Fe         | 1566108.467 | 209705.8787 | 13.39025254 |
| UIJ68852.1 | DinB_family_protein_[Bacillus_cereus]                           | CPTF_Mn         | 1395869.567 | 456185.4524 | 32.68109452 |
| UIJ68852.1 | DinB_family_protein_[Bacillus_cereus]                           | CPTF_Ni         | 1691005.633 | 74335.9     | 4.395958152 |
| UIJ68852.1 | DinB_family_protein_[Bacillus_cereus]                           | CPTF_U          | 1833244     | 190678.1751 | 10.40113455 |
| UIJ68852.1 | DinB_family_protein_[Bacillus_cereus]                           | CPTF_metals_mix | 1306816.033 | 103886.7928 | 7.949611124 |
| UIJ68852.1 | DinB_family_protein_[Bacillus_cereus]                           | CPTF_zcontrol   | 1602261     | 94363.5119  | 5.889397039 |
| UIJ68858.1 | DinB_family_protein_[Bacillus_cereus]                           | CPTF_Al         | 60347.83333 | 15040.60989 | 24.92319783 |
| UIJ68858.1 | DinB_family_protein_[Bacillus_cereus]                           | CPTF_Cd         | 86599.06667 | 28843.30025 | 33.30671029 |
| UIJ68858.1 | DinB_family_protein_[Bacillus_cereus]                           | CPTF_Co         | 65569.6     | 10634.67236 | 16.21890688 |
| UIJ68858.1 | DinB_family_protein_[Bacillus_cereus]                           | CPTF_Cu         | 44202.2     | 20712.53269 | 46.85860136 |
| UIJ68858.1 | DinB_family_protein_[Bacillus_cereus]                           | CPTF_Fe         | 62360.8     | 21858.59605 | 35.0518211  |
| UIJ68858.1 | DinB_family_protein_[Bacillus_cereus]                           | CPTF_Mn         | 36317.36667 | 36097.2511  | 99.393911   |
| UIJ68858.1 | DinB_family_protein_[Bacillus_cereus]                           | CPTF_Ni         | 40032.9     | 11073.91449 | 27.66203421 |
| UIJ68858.1 | DinB_family_protein_[Bacillus_cereus]                           | CPTF_U          | 7413.933333 | 12841.30922 | 173.2050808 |
| UIJ68858.1 | DinB_family_protein_[Bacillus_cereus]                           | CPTF_metals_mix | 269492.9333 | 69409.64949 | 25.75564733 |
| UIJ68858.1 | DinB_family_protein_[Bacillus_cereus]                           | CPTF_zcontrol   | 38760.86667 | 34887.43909 | 90.00686024 |
| UIJ68880.1 | kynureninase_[Bacillus_cereus]                                  | CPTF_Al         | 336733.1    | 148867.3003 | 44.20928633 |
| UIJ68880.1 | kynureninase_[Bacillus_cereus]                                  | CPTF_Cd         | 503587.6667 | 21521.54774 | 4.273644724 |
| UIJ68880.1 | kynureninase_[Bacillus_cereus]                                  | CPTF_Co         | 368291.09   | 41298.64001 | 11.21358652 |
| UIJ68880.1 | kynureninase_[Bacillus_cereus]                                  | CPTF_Cu         | 322182.2667 | 142160.6508 | 44.12429409 |
| UIJ68880.1 | kynureninase_[Bacillus_cereus]                                  | CPTF_Fe         | 397362.8633 | 31150.75093 | 7.839371467 |
| UIJ68880.1 | kynureninase_[Bacillus_cereus]                                  | CPTF_Mn         | 207080.6    | 179283.1641 | 86.57651373 |
| UIJ68880.1 | kynureninase_[Bacillus_cereus]                                  | CPTF_Ni         | 339983.7667 | 186074.9044 | 54.73052618 |
| UIJ68880.1 | kynureninase_[Bacillus_cereus]                                  | CPTF_U          | 182922.2333 | 172224.6657 | 94.15184942 |
| UIJ68880.1 | kynureninase_[Bacillus_cereus]                                  | CPTF_metals_mix | 249389.76   | 60922.29795 | 24.42854829 |
| UIJ68880.1 | kynureninase_[Bacillus_cereus]                                  | CPTF_zcontrol   | 284329.9667 | 123222.8309 | 43.33796834 |
| UIJ68890.1 | class_I_SAM-dependent_methyltransferase_[Bacillus_cereus]       | CPTF_Al         | 5595.133333 | 9691.055208 | 173.2050808 |
| UIJ68890.1 | class_I_SAM-dependent_methyltransferase_[Bacillus_cereus]       | CPTF_Cd         | 7222.6      | 12509.91016 | 173.2050808 |
| UIJ68890.1 | class_I_SAM-dependent_methyltransferase_[Bacillus_cereus]       | CPTF_Co         | 15489.6     | 14349.84511 | 92.64180556 |
| UIJ68890.1 | class_I_SAM-dependent_methyltransferase_[Bacillus_cereus]       | CPTF_Cu         | 25094.93333 | 25438.59621 | 101.3694512 |
| UIJ68890.1 | class_I_SAM-dependent_methyltransferase_[Bacillus_cereus]       | CPTF_Fe         | 0           | 0           | 0           |
| UIJ68890.1 | class_I_SAM-dependent_methyltransferase_[Bacillus_cereus]       | CPTF_Mn         | 0           | 0           | 0           |
| UIJ68890.1 | class_I_SAM-dependent_methyltransferase_[Bacillus_cereus]       | CPTF_Ni         | 0           | 0           | 0           |
| UIJ68890.1 | class_I_SAM-dependent_methyltransferase_[Bacillus_cereus]       | CPTF_U          | 0           | 0           | 0           |
| UIJ68890.1 | class_I_SAM-dependent_methyltransferase_[Bacillus_cereus]       | CPTF_metals_mix | 22131.83333 | 6061.491777 | 27.38811415 |
| UIJ68890.1 | class_I_SAM-dependent_methyltransferase_[Bacillus_cereus]       | CPTF_zcontrol   | 0           | 0           | 0           |
| UIJ68909.1 | GNAT_family_N-acetyltransferase_[Bacillus_cereus]               | CPTF_Al         | 0           | 0           | 0           |
| UIJ68909.1 | GNAT_family_N-acetyltransferase_[Bacillus_cereus]               | CPTF_Cd         | 0           | 0           | 0           |
| UIJ68909.1 | GNAT_family_N-acetyltransferase_[Bacillus_cereus]               | CPTF_Co         | 69758       | 120824.4002 | 173.2050808 |
| UIJ68909.1 | GNAT_family_N-acetyltransferase_[Bacillus_cereus]               | CPTF_Cu         | 0           | 0           | 0           |
| UIJ68909.1 | GNAT_family_N-acetyltransferase_[Bacillus_cereus]               | CPTF_Fe         | 0           | 0           | 0           |
| UIJ68909.1 | GNAT_family_N-acetyltransferase_[Bacillus_cereus]               | CPTF_Mn         | 0           | 0           | 0           |
| UIJ68909.1 | GNAT_family_N-acetyltransferase_[Bacillus_cereus]               | CPTF_Ni         | 0           | 0           | 0           |
| UIJ68909.1 | GNAT_family_N-acetyltransferase_[Bacillus_cereus]               | CPTF_U          | 0           | 0           | 0           |
| UIJ68909.1 | GNAT_family_N-acetyltransferase_[Bacillus_cereus]               | CPTF_metals_mix | 33528       | 58072.19948 | 173.2050808 |
| UIJ68909.1 | GNAT_family_N-acetyltransferase_[Bacillus_cereus]               | CPTF_zcontrol   | 0           | 0           | 0           |
| UIJ68939.1 | manganese-dependent_inorganic_pyrophosphatase_[Bacillus_cereus] | CPTF_Al         | 2128287.333 | 175338.5454 | 8.238480897 |
| UIJ68939.1 | manganese-dependent_inorganic_pyrophosphatase_[Bacillus_cereus] | CPTF_Cd         | 2485184.2   | 79446.17826 | 3.196792345 |
| UIJ68939.1 | manganese-dependent_inorganic_pyrophosphatase_[Bacillus_cereus] | CPTF_Co         | 2453034.6   | 147389.6097 | 6.008460284 |
| UIJ68939.1 | manganese-dependent_inorganic_pyrophosphatase_[Bacillus_cereus] | CPTF_Cu         | 1980458.133 | 40872.84667 | 2.06380756  |
| UIJ68939.1 | manganese-dependent_inorganic_pyrophosphatase_[Bacillus_cereus] | CPTF_Fe         | 2232861.6   | 342914.1972 | 15.35761093 |

|            |                                                                 |                 |             |             |             |
|------------|-----------------------------------------------------------------|-----------------|-------------|-------------|-------------|
| UIJ68939.1 | manganese-dependent_inorganic_pyrophosphatase_[Bacillus_cereus] | CPTF_Mn         | 2860817.7   | 848804.761  | 29.67000522 |
| UIJ68939.1 | manganese-dependent_inorganic_pyrophosphatase_[Bacillus_cereus] | CPTF_Ni         | 1894286.4   | 294641.463  | 15.55421941 |
| UIJ68939.1 | manganese-dependent_inorganic_pyrophosphatase_[Bacillus_cereus] | CPTF_U          | 1908976.8   | 115876.3421 | 6.070075976 |
| UIJ68939.1 | manganese-dependent_inorganic_pyrophosphatase_[Bacillus_cereus] | CPTF_metals_mix | 5956121.9   | 665269.2734 | 11.16950399 |
| UIJ68939.1 | manganese-dependent_inorganic_pyrophosphatase_[Bacillus_cereus] | CPTF_zcontrol   | 2206838.9   | 323118.1233 | 14.64167245 |
| UIJ68941.1 | GNAT_family_N-acetyltransferase_[Bacillus_cereus]               | CPTF_Al         | 20479.7     | 17737.5112  | 86.61021012 |
| UIJ68941.1 | GNAT_family_N-acetyltransferase_[Bacillus_cereus]               | CPTF_Cd         | 34481.93333 | 6494.590522 | 18.83476329 |
| UIJ68941.1 | GNAT_family_N-acetyltransferase_[Bacillus_cereus]               | CPTF_Co         | 27067.53333 | 37117.95233 | 137.130901  |
| UIJ68941.1 | GNAT_family_N-acetyltransferase_[Bacillus_cereus]               | CPTF_Cu         | 50904.66667 | 88169.46901 | 173.2050808 |
| UIJ68941.1 | GNAT_family_N-acetyltransferase_[Bacillus_cereus]               | CPTF_Fe         | 0           | 0           | 0           |
| UIJ68941.1 | GNAT_family_N-acetyltransferase_[Bacillus_cereus]               | CPTF_Mn         | 0           | 0           | 0           |
| UIJ68941.1 | GNAT_family_N-acetyltransferase_[Bacillus_cereus]               | CPTF_Ni         | 54847.66667 | 94998.94534 | 173.2050808 |
| UIJ68941.1 | GNAT_family_N-acetyltransferase_[Bacillus_cereus]               | CPTF_U          | 28855.6     | 27388.99974 | 94.91745013 |
| UIJ68941.1 | GNAT_family_N-acetyltransferase_[Bacillus_cereus]               | CPTF_metals_mix | 16276.73333 | 28192.12911 | 173.2050808 |
| UIJ68941.1 | GNAT_family_N-acetyltransferase_[Bacillus_cereus]               | CPTF_zcontrol   | 10218.23333 | 17698.4993  | 173.2050808 |
| UIJ68981.1 | HAD_hydrolase-like_protein_[Bacillus_cereus]                    | CPTF_Al         | 0           | 0           | 0           |
| UIJ68981.1 | HAD_hydrolase-like_protein_[Bacillus_cereus]                    | CPTF_Cd         | 0           | 0           | 0           |
| UIJ68981.1 | HAD_hydrolase-like_protein_[Bacillus_cereus]                    | CPTF_Co         | 0           | 0           | 0           |
| UIJ68981.1 | HAD_hydrolase-like_protein_[Bacillus_cereus]                    | CPTF_Cu         | 0           | 0           | 0           |
| UIJ68981.1 | HAD_hydrolase-like_protein_[Bacillus_cereus]                    | CPTF_Fe         | 0           | 0           | 0           |
| UIJ68981.1 | HAD_hydrolase-like_protein_[Bacillus_cereus]                    | CPTF_Mn         | 0           | 0           | 0           |
| UIJ68981.1 | HAD_hydrolase-like_protein_[Bacillus_cereus]                    | CPTF_Ni         | 0           | 0           | 0           |
| UIJ68981.1 | HAD_hydrolase-like_protein_[Bacillus_cereus]                    | CPTF_U          | 0           | 0           | 0           |
| UIJ68981.1 | HAD_hydrolase-like_protein_[Bacillus_cereus]                    | CPTF_metals_mix | 0           | 0           | 0           |
| UIJ68981.1 | HAD_hydrolase-like_protein_[Bacillus_cereus]                    | CPTF_zcontrol   | 11115.76667 | 19253.07263 | 173.2050808 |
| UIJ69000.1 | cytosolic_protein_[Bacillus_cereus]                             | CPTF_Al         | 0           | 0           | 0           |
| UIJ69000.1 | cytosolic_protein_[Bacillus_cereus]                             | CPTF_Cd         | 0           | 0           | 0           |
| UIJ69000.1 | cytosolic_protein_[Bacillus_cereus]                             | CPTF_Co         | 17297.26667 | 29959.7447  | 173.2050808 |
| UIJ69000.1 | cytosolic_protein_[Bacillus_cereus]                             | CPTF_Cu         | 0           | 0           | 0           |
| UIJ69000.1 | cytosolic_protein_[Bacillus_cereus]                             | CPTF_Fe         | 0           | 0           | 0           |
| UIJ69000.1 | cytosolic_protein_[Bacillus_cereus]                             | CPTF_Mn         | 0           | 0           | 0           |
| UIJ69000.1 | cytosolic_protein_[Bacillus_cereus]                             | CPTF_Ni         | 0           | 0           | 0           |
| UIJ69000.1 | cytosolic_protein_[Bacillus_cereus]                             | CPTF_U          | 0           | 0           | 0           |
| UIJ69000.1 | cytosolic_protein_[Bacillus_cereus]                             | CPTF_metals_mix | 100540.4    | 24194.27541 | 24.0642323  |
| UIJ69000.1 | cytosolic_protein_[Bacillus_cereus]                             | CPTF_zcontrol   | 0           | 0           | 0           |
| UIJ69004.1 | class_I_SAM-dependent_methyltransferase_[Bacillus_cereus]       | CPTF_Al         | 37273.6     | 3677.479274 | 9.866176795 |
| UIJ69004.1 | class_I_SAM-dependent_methyltransferase_[Bacillus_cereus]       | CPTF_Cd         | 47339.1     | 3820.726805 | 8.070974744 |
| UIJ69004.1 | class_I_SAM-dependent_methyltransferase_[Bacillus_cereus]       | CPTF_Co         | 41783.76667 | 15863.22272 | 37.96503759 |
| UIJ69004.1 | class_I_SAM-dependent_methyltransferase_[Bacillus_cereus]       | CPTF_Cu         | 61876.7     | 24764.72604 | 40.02270005 |
| UIJ69004.1 | class_I_SAM-dependent_methyltransferase_[Bacillus_cereus]       | CPTF_Fe         | 57989.9     | 23282.88802 | 40.149902   |
| UIJ69004.1 | class_I_SAM-dependent_methyltransferase_[Bacillus_cereus]       | CPTF_Mn         | 31938.4     | 55318.93151 | 173.2050808 |
| UIJ69004.1 | class_I_SAM-dependent_methyltransferase_[Bacillus_cereus]       | CPTF_Ni         | 83877.63333 | 14321.82228 | 17.07466187 |
| UIJ69004.1 | class_I_SAM-dependent_methyltransferase_[Bacillus_cereus]       | CPTF_U          | 39879.16667 | 35183.83936 | 88.22611479 |
| UIJ69004.1 | class_I_SAM-dependent_methyltransferase_[Bacillus_cereus]       | CPTF_metals_mix | 21732.26667 | 2216.805831 | 10.20052747 |
| UIJ69004.1 | class_I_SAM-dependent_methyltransferase_[Bacillus_cereus]       | CPTF_zcontrol   | 38462.36667 | 35328.64107 | 91.85248889 |
| UIJ69005.1 | hypothetical_protein_LW858_12670_[Bacillus_cereus]              | CPTF_Al         | 2923333.333 | 576570.3195 | 19.723044   |
| UIJ69005.1 | hypothetical_protein_LW858_12670_[Bacillus_cereus]              | CPTF_Cd         | 2433333.333 | 353459.0971 | 14.52571632 |
| UIJ69005.1 | hypothetical_protein_LW858_12670_[Bacillus_cereus]              | CPTF_Co         | 2793333.333 | 245831.9209 | 8.800665426 |
| UIJ69005.1 | hypothetical_protein_LW858_12670_[Bacillus_cereus]              | CPTF_Cu         | 2930000     | 149331.8452 | 5.096650008 |
| UIJ69005.1 | hypothetical_protein_LW858_12670_[Bacillus_cereus]              | CPTF_Fe         | 1916666.667 | 1663199.727 | 86.77563795 |
| UIJ69005.1 | hypothetical_protein_LW858_12670_[Bacillus_cereus]              | CPTF_Mn         | 2560000     | 1319242.207 | 51.5328987  |
| UIJ69005.1 | hypothetical_protein_LW858_12670_[Bacillus_cereus]              | CPTF_Ni         | 3610000     | 272213.1518 | 7.54053052  |
| UIJ69005.1 | hypothetical_protein_LW858_12670_[Bacillus_cereus]              | CPTF_U          | 3493333.333 | 280237.9941 | 8.022079984 |
| UIJ69005.1 | hypothetical_protein_LW858_12670_[Bacillus_cereus]              | CPTF_metals_mix | 0           | 0           | 0           |
| UIJ69005.1 | hypothetical_protein_LW858_12670_[Bacillus_cereus]              | CPTF_zcontrol   | 3340000     | 228691.9325 | 6.847063848 |
| UIJ69011.1 | LL-diaminopimelate_aminotransferase_[Bacillus_cereus]           | CPTF_Al         | 352460.4    | 116543.8095 | 33.06578825 |
| UIJ69011.1 | LL-diaminopimelate_aminotransferase_[Bacillus_cereus]           | CPTF_Cd         | 223177.3333 | 31076.14835 | 13.9244196  |
| UIJ69011.1 | LL-diaminopimelate_aminotransferase_[Bacillus_cereus]           | CPTF_Co         | 272844.5333 | 40825.45293 | 14.96289936 |
| UIJ69011.1 | LL-diaminopimelate_aminotransferase_[Bacillus_cereus]           | CPTF_Cu         | 435899.5667 | 120626.204  | 27.67293505 |
| UIJ69011.1 | LL-diaminopimelate_aminotransferase_[Bacillus_cereus]           | CPTF_Fe         | 279164.0667 | 16962.54821 | 6.076193263 |
| UIJ69011.1 | LL-diaminopimelate_aminotransferase_[Bacillus_cereus]           | CPTF_Mn         | 251253.3333 | 114838.1845 | 45.70613372 |

|            |                                                                    |                 |             |             |             |
|------------|--------------------------------------------------------------------|-----------------|-------------|-------------|-------------|
| UIJ69011.1 | LL-diaminopimelate_aminotransferase [Bacillus cereus]              | CPTF_Ni         | 313563.8667 | 65483.30526 | 20.88356224 |
| UIJ69011.1 | LL-diaminopimelate_aminotransferase [Bacillus cereus]              | CPTF_U          | 321396      | 19767.76019 | 6.150593098 |
| UIJ69011.1 | LL-diaminopimelate_aminotransferase [Bacillus cereus]              | CPTF_metals_mix | 374467.3667 | 40933.49245 | 10.93112407 |
| UIJ69011.1 | LL-diaminopimelate_aminotransferase [Bacillus cereus]              | CPTF_zcontrol   | 272973.9667 | 56078.85368 | 20.54366369 |
| UIJ69012.1 | beta-hydroxyacyl-ACP_dehydratase [Bacillus cereus]                 | CPTF_Al         | 269318.4667 | 23763.12468 | 8.823429368 |
| UIJ69012.1 | beta-hydroxyacyl-ACP_dehydratase [Bacillus cereus]                 | CPTF_Cd         | 163852.4667 | 99647.88041 | 60.81561202 |
| UIJ69012.1 | beta-hydroxyacyl-ACP_dehydratase [Bacillus cereus]                 | CPTF_Co         | 234814.1    | 62512.36537 | 26.6220663  |
| UIJ69012.1 | beta-hydroxyacyl-ACP_dehydratase [Bacillus cereus]                 | CPTF_Cu         | 272135.3333 | 53445.37006 | 19.63926161 |
| UIJ69012.1 | beta-hydroxyacyl-ACP_dehydratase [Bacillus cereus]                 | CPTF_Fe         | 261265.3333 | 100970.2799 | 38.64664271 |
| UIJ69012.1 | beta-hydroxyacyl-ACP_dehydratase [Bacillus cereus]                 | CPTF_Mn         | 97803.66667 | 169400.9198 | 173.2050808 |
| UIJ69012.1 | beta-hydroxyacyl-ACP_dehydratase [Bacillus cereus]                 | CPTF_Ni         | 134412.9333 | 133230.0874 | 99.119991   |
| UIJ69012.1 | beta-hydroxyacyl-ACP_dehydratase [Bacillus cereus]                 | CPTF_U          | 71175.86667 | 123280.2173 | 173.2050808 |
| UIJ69012.1 | beta-hydroxyacyl-ACP_dehydratase [Bacillus cereus]                 | CPTF_metals_mix | 21221.13333 | 36756.08113 | 173.2050808 |
| UIJ69012.1 | beta-hydroxyacyl-ACP_dehydratase [Bacillus cereus]                 | CPTF_zcontrol   | 118165.1667 | 122747.8199 | 103.8781761 |
| UIJ69025.1 | FMNH2-dependent_alkanesulfonate_monooxygenase [Bacillus cereus]    | CPTF_Al         | 62634.1     | 7104.200505 | 11.34238459 |
| UIJ69025.1 | FMNH2-dependent_alkanesulfonate_monooxygenase [Bacillus cereus]    | CPTF_Cd         | 59927.56667 | 9533.133944 | 15.90776078 |
| UIJ69025.1 | FMNH2-dependent_alkanesulfonate_monooxygenase [Bacillus cereus]    | CPTF_Co         | 44766.56667 | 38772.5392  | 86.61048207 |
| UIJ69025.1 | FMNH2-dependent_alkanesulfonate_monooxygenase [Bacillus cereus]    | CPTF_Cu         | 158880.8333 | 14218.89244 | 8.94940701  |
| UIJ69025.1 | FMNH2-dependent_alkanesulfonate_monooxygenase [Bacillus cereus]    | CPTF_Fe         | 81381.6     | 60221.10599 | 73.99842961 |
| UIJ69025.1 | FMNH2-dependent_alkanesulfonate_monooxygenase [Bacillus cereus]    | CPTF_Mn         | 43996.71    | 67781.90807 | 154.0613106 |
| UIJ69025.1 | FMNH2-dependent_alkanesulfonate_monooxygenase [Bacillus cereus]    | CPTF_Ni         | 143738.6667 | 15367.28103 | 10.69112535 |
| UIJ69025.1 | FMNH2-dependent_alkanesulfonate_monooxygenase [Bacillus cereus]    | CPTF_U          | 115831.8333 | 60953.67955 | 52.62256307 |
| UIJ69025.1 | FMNH2-dependent_alkanesulfonate_monooxygenase [Bacillus cereus]    | CPTF_metals_mix | 0           | 0           | 0           |
| UIJ69025.1 | FMNH2-dependent_alkanesulfonate_monooxygenase [Bacillus cereus]    | CPTF_zcontrol   | 110483.3    | 44716.32679 | 40.47338086 |
| UIJ69034.1 | hypothetical_protein_LW858_12820 [Bacillus cereus]                 | CPTF_Al         | 0           | 0           | 0           |
| UIJ69034.1 | hypothetical_protein_LW858_12820 [Bacillus cereus]                 | CPTF_Cd         | 0           | 0           | 0           |
| UIJ69034.1 | hypothetical_protein_LW858_12820 [Bacillus cereus]                 | CPTF_Co         | 0           | 0           | 0           |
| UIJ69034.1 | hypothetical_protein_LW858_12820 [Bacillus cereus]                 | CPTF_Cu         | 0           | 0           | 0           |
| UIJ69034.1 | hypothetical_protein_LW858_12820 [Bacillus cereus]                 | CPTF_Fe         | 12298.03333 | 21300.81857 | 173.2050808 |
| UIJ69034.1 | hypothetical_protein_LW858_12820 [Bacillus cereus]                 | CPTF_Mn         | 0           | 0           | 0           |
| UIJ69034.1 | hypothetical_protein_LW858_12820 [Bacillus cereus]                 | CPTF_Ni         | 0           | 0           | 0           |
| UIJ69034.1 | hypothetical_protein_LW858_12820 [Bacillus cereus]                 | CPTF_U          | 0           | 0           | 0           |
| UIJ69034.1 | hypothetical_protein_LW858_12820 [Bacillus cereus]                 | CPTF_metals_mix | 5286        | 9155.620569 | 173.2050808 |
| UIJ69034.1 | hypothetical_protein_LW858_12820 [Bacillus cereus]                 | CPTF_zcontrol   | 0           | 0           | 0           |
| UIJ69040.1 | nucleotidyltransferase_domain-containing_protein [Bacillus cereus] | CPTF_Al         | 8779.266667 | 15206.13592 | 173.2050808 |
| UIJ69040.1 | nucleotidyltransferase_domain-containing_protein [Bacillus cereus] | CPTF_Cd         | 9322.666667 | 16147.33233 | 173.2050808 |
| UIJ69040.1 | nucleotidyltransferase_domain-containing_protein [Bacillus cereus] | CPTF_Co         | 5348.4      | 9263.700539 | 173.2050808 |
| UIJ69040.1 | nucleotidyltransferase_domain-containing_protein [Bacillus cereus] | CPTF_Cu         | 0           | 0           | 0           |
| UIJ69040.1 | nucleotidyltransferase_domain-containing_protein [Bacillus cereus] | CPTF_Fe         | 9693.366667 | 16789.40356 | 173.2050808 |
| UIJ69040.1 | nucleotidyltransferase_domain-containing_protein [Bacillus cereus] | CPTF_Mn         | 0           | 0           | 0           |
| UIJ69040.1 | nucleotidyltransferase_domain-containing_protein [Bacillus cereus] | CPTF_Ni         | 0           | 0           | 0           |
| UIJ69040.1 | nucleotidyltransferase_domain-containing_protein [Bacillus cereus] | CPTF_U          | 0           | 0           | 0           |
| UIJ69040.1 | nucleotidyltransferase_domain-containing_protein [Bacillus cereus] | CPTF_metals_mix | 0           | 0           | 0           |
| UIJ69040.1 | nucleotidyltransferase_domain-containing_protein [Bacillus cereus] | CPTF_zcontrol   | 0           | 0           | 0           |
| UIJ69042.1 | pyridoxal-phosphate_dependent_enzyme [Bacillus cereus]             | CPTF_Al         | 26360.46667 | 45657.66758 | 173.2050808 |
| UIJ69042.1 | pyridoxal-phosphate_dependent_enzyme [Bacillus cereus]             | CPTF_Cd         | 10479.8     | 18151.54605 | 173.2050808 |
| UIJ69042.1 | pyridoxal-phosphate_dependent_enzyme [Bacillus cereus]             | CPTF_Co         | 92631.56667 | 116811.5328 | 126.103376  |
| UIJ69042.1 | pyridoxal-phosphate_dependent_enzyme [Bacillus cereus]             | CPTF_Cu         | 63896.56667 | 74042.15831 | 115.8781483 |
| UIJ69042.1 | pyridoxal-phosphate_dependent_enzyme [Bacillus cereus]             | CPTF_Fe         | 0           | 0           | 0           |
| UIJ69042.1 | pyridoxal-phosphate_dependent_enzyme [Bacillus cereus]             | CPTF_Mn         | 53955.33333 | 93453.37867 | 173.2050808 |
| UIJ69042.1 | pyridoxal-phosphate_dependent_enzyme [Bacillus cereus]             | CPTF_Ni         | 0           | 0           | 0           |
| UIJ69042.1 | pyridoxal-phosphate_dependent_enzyme [Bacillus cereus]             | CPTF_U          | 0           | 0           | 0           |
| UIJ69042.1 | pyridoxal-phosphate_dependent_enzyme [Bacillus cereus]             | CPTF_metals_mix | 16364.6     | 28344.31865 | 173.2050808 |
| UIJ69042.1 | pyridoxal-phosphate_dependent_enzyme [Bacillus cereus]             | CPTF_zcontrol   | 0           | 0           | 0           |
| UIJ69043.1 | VOC_family_protein [Bacillus cereus]                               | CPTF_Al         | 5489383.833 | 403231.2388 | 7.345655743 |
| UIJ69043.1 | VOC_family_protein [Bacillus cereus]                               | CPTF_Cd         | 3802538.767 | 263834.0406 | 6.93836557  |
| UIJ69043.1 | VOC_family_protein [Bacillus cereus]                               | CPTF_Co         | 5289890.843 | 471645.7346 | 8.915982362 |
| UIJ69043.1 | VOC_family_protein [Bacillus cereus]                               | CPTF_Cu         | 7349014.6   | 796122.7902 | 10.83305495 |
| UIJ69043.1 | VOC_family_protein [Bacillus cereus]                               | CPTF_Fe         | 4448102.033 | 345902.2926 | 7.776401935 |
| UIJ69043.1 | VOC_family_protein [Bacillus cereus]                               | CPTF_Mn         | 5170607.767 | 450881.5434 | 8.720087923 |
| UIJ69043.1 | VOC_family_protein [Bacillus cereus]                               | CPTF_Ni         | 5606090.633 | 477289.5616 | 8.513768199 |

|            |                                                                  |                 |             |             |             |
|------------|------------------------------------------------------------------|-----------------|-------------|-------------|-------------|
| UIJ69043.1 | VOC_family_protein [Bacillus cereus]                             | CPTF_U          | 5051190.333 | 1069211.187 | 21.16750936 |
| UIJ69043.1 | VOC_family_protein [Bacillus cereus]                             | CPTF_metals_mix | 6990246.1   | 446219.5906 | 6.383460385 |
| UIJ69043.1 | VOC_family_protein [Bacillus cereus]                             | CPTF_zcontrol   | 5412017.967 | 493044.2126 | 9.11017324  |
| UIJ69044.1 | MBL_fold_metallo-hydrolase [Bacillus cereus]                     | CPTF_Al         | 687861.4    | 46843.06038 | 6.809956247 |
| UIJ69044.1 | MBL_fold_metallo-hydrolase [Bacillus cereus]                     | CPTF_Cd         | 554424.6    | 100877.7832 | 18.19504098 |
| UIJ69044.1 | MBL_fold_metallo-hydrolase [Bacillus cereus]                     | CPTF_Co         | 734574.3    | 82465.59569 | 11.22631103 |
| UIJ69044.1 | MBL_fold_metallo-hydrolase [Bacillus cereus]                     | CPTF_Cu         | 1114499.967 | 156959.3823 | 14.08339049 |
| UIJ69044.1 | MBL_fold_metallo-hydrolase [Bacillus cereus]                     | CPTF_Fe         | 537961.9    | 36541.92132 | 6.792659725 |
| UIJ69044.1 | MBL_fold_metallo-hydrolase [Bacillus cereus]                     | CPTF_Mn         | 660947.6667 | 92441.57321 | 13.98621674 |
| UIJ69044.1 | MBL_fold_metallo-hydrolase [Bacillus cereus]                     | CPTF_Ni         | 669871.6667 | 76715.9104  | 11.45232949 |
| UIJ69044.1 | MBL_fold_metallo-hydrolase [Bacillus cereus]                     | CPTF_U          | 609407.3333 | 294481.1523 | 48.32254819 |
| UIJ69044.1 | MBL_fold_metallo-hydrolase [Bacillus cereus]                     | CPTF_metals_mix | 2279685.067 | 161584.6137 | 7.08802352  |
| UIJ69044.1 | MBL_fold_metallo-hydrolase [Bacillus cereus]                     | CPTF_zcontrol   | 657294      | 162238.9404 | 24.68285734 |
| UIJ69045.1 | polysaccharide_deacetylase [Bacillus cereus]                     | CPTF_Al         | 15033.33333 | 26038.49714 | 173.2050808 |
| UIJ69045.1 | polysaccharide_deacetylase [Bacillus cereus]                     | CPTF_Cd         | 121406      | 110349.8103 | 90.89320984 |
| UIJ69045.1 | polysaccharide_deacetylase [Bacillus cereus]                     | CPTF_Co         | 11293.86667 | 19561.55088 | 173.2050808 |
| UIJ69045.1 | polysaccharide_deacetylase [Bacillus cereus]                     | CPTF_Cu         | 0           | 0           | 0           |
| UIJ69045.1 | polysaccharide_deacetylase [Bacillus cereus]                     | CPTF_Fe         | 73731.66667 | 127706.9928 | 173.2050808 |
| UIJ69045.1 | polysaccharide_deacetylase [Bacillus cereus]                     | CPTF_Mn         | 78721.16667 | 136349.0603 | 173.2050808 |
| UIJ69045.1 | polysaccharide_deacetylase [Bacillus cereus]                     | CPTF_Ni         | 16866.2     | 29213.11533 | 173.2050808 |
| UIJ69045.1 | polysaccharide_deacetylase [Bacillus cereus]                     | CPTF_U          | 0           | 0           | 0           |
| UIJ69045.1 | polysaccharide_deacetylase [Bacillus cereus]                     | CPTF_metals_mix | 198542.3667 | 118032.6887 | 59.44962314 |
| UIJ69045.1 | polysaccharide_deacetylase [Bacillus cereus]                     | CPTF_zcontrol   | 0           | 0           | 0           |
| UIJ69049.1 | ATP-binding_cassette_domain-containing_protein [Bacillus cereus] | CPTF_Al         | 1264360.367 | 450847.1017 | 35.65811722 |
| UIJ69049.1 | ATP-binding_cassette_domain-containing_protein [Bacillus cereus] | CPTF_Cd         | 1189771.533 | 399605.1089 | 33.58670952 |
| UIJ69049.1 | ATP-binding_cassette_domain-containing_protein [Bacillus cereus] | CPTF_Co         | 1422548.033 | 199352.5262 | 14.01376415 |
| UIJ69049.1 | ATP-binding_cassette_domain-containing_protein [Bacillus cereus] | CPTF_Cu         | 1411204.8   | 159182.1417 | 11.2798753  |
| UIJ69049.1 | ATP-binding_cassette_domain-containing_protein [Bacillus cereus] | CPTF_Fe         | 1334143.933 | 235064.9781 | 17.61916179 |
| UIJ69049.1 | ATP-binding_cassette_domain-containing_protein [Bacillus cereus] | CPTF_Mn         | 1085539.067 | 124309.8638 | 11.45144082 |
| UIJ69049.1 | ATP-binding_cassette_domain-containing_protein [Bacillus cereus] | CPTF_Ni         | 1116838.867 | 143684.8211 | 12.86531347 |
| UIJ69049.1 | ATP-binding_cassette_domain-containing_protein [Bacillus cereus] | CPTF_U          | 1029516.7   | 239914.9106 | 23.30364438 |
| UIJ69049.1 | ATP-binding_cassette_domain-containing_protein [Bacillus cereus] | CPTF_metals_mix | 1890475.333 | 208103.6745 | 11.00800793 |
| UIJ69049.1 | ATP-binding_cassette_domain-containing_protein [Bacillus cereus] | CPTF_zcontrol   | 1298809.2   | 131697.4159 | 10.13985857 |
| UIJ69050.1 | hypothetical_protein_LW858_12905 [Bacillus cereus]               | CPTF_Al         | 18247.8     | 16002.31097 | 87.69446712 |
| UIJ69050.1 | hypothetical_protein_LW858_12905 [Bacillus cereus]               | CPTF_Cd         | 26443.53333 | 22958.40951 | 86.82050623 |
| UIJ69050.1 | hypothetical_protein_LW858_12905 [Bacillus cereus]               | CPTF_Co         | 24027.46667 | 6208.841668 | 25.84060049 |
| UIJ69050.1 | hypothetical_protein_LW858_12905 [Bacillus cereus]               | CPTF_Cu         | 44098.33333 | 17436.04733 | 39.53901657 |
| UIJ69050.1 | hypothetical_protein_LW858_12905 [Bacillus cereus]               | CPTF_Fe         | 17182.13333 | 14974.35384 | 87.15072542 |
| UIJ69050.1 | hypothetical_protein_LW858_12905 [Bacillus cereus]               | CPTF_Mn         | 10453.03333 | 18105.18483 | 173.2050808 |
| UIJ69050.1 | hypothetical_protein_LW858_12905 [Bacillus cereus]               | CPTF_Ni         | 20469.5     | 20767.81562 | 101.4573664 |
| UIJ69050.1 | hypothetical_protein_LW858_12905 [Bacillus cereus]               | CPTF_U          | 0           | 0           | 0           |
| UIJ69050.1 | hypothetical_protein_LW858_12905 [Bacillus cereus]               | CPTF_metals_mix | 56689.33333 | 19541.914   | 34.47194182 |
| UIJ69050.1 | hypothetical_protein_LW858_12905 [Bacillus cereus]               | CPTF_zcontrol   | 8202.333333 | 14206.85807 | 173.2050808 |
| UIJ69053.1 | GNAT_family_N-acetyltransferase [Bacillus cereus]                | CPTF_Al         | 0           | 0           | 0           |
| UIJ69053.1 | GNAT_family_N-acetyltransferase [Bacillus cereus]                | CPTF_Cd         | 62653.9     | 54651.04826 | 87.22688972 |
| UIJ69053.1 | GNAT_family_N-acetyltransferase [Bacillus cereus]                | CPTF_Co         | 121944      | 110270.0494 | 90.42679377 |
| UIJ69053.1 | GNAT_family_N-acetyltransferase [Bacillus cereus]                | CPTF_Cu         | 13382.66667 | 23179.45861 | 173.2050808 |
| UIJ69053.1 | GNAT_family_N-acetyltransferase [Bacillus cereus]                | CPTF_Fe         | 32528.2     | 56340.49508 | 173.2050808 |
| UIJ69053.1 | GNAT_family_N-acetyltransferase [Bacillus cereus]                | CPTF_Mn         | 41714.33333 | 72251.34474 | 173.2050808 |
| UIJ69053.1 | GNAT_family_N-acetyltransferase [Bacillus cereus]                | CPTF_Ni         | 40022.66667 | 69321.29212 | 173.2050808 |
| UIJ69053.1 | GNAT_family_N-acetyltransferase [Bacillus cereus]                | CPTF_U          | 0           | 0           | 0           |
| UIJ69053.1 | GNAT_family_N-acetyltransferase [Bacillus cereus]                | CPTF_metals_mix | 52263.56667 | 54839.94758 | 104.9295926 |
| UIJ69053.1 | GNAT_family_N-acetyltransferase [Bacillus cereus]                | CPTF_zcontrol   | 36920       | 63947.31582 | 173.2050808 |
| UIJ69054.1 | 3-phosphoshikimate_1-carboxyvinyltransferase [Bacillus cereus]   | CPTF_Al         | 2801465.567 | 103971.1253 | 3.711311912 |
| UIJ69054.1 | 3-phosphoshikimate_1-carboxyvinyltransferase [Bacillus cereus]   | CPTF_Cd         | 3966182.133 | 1090304.794 | 27.49003343 |
| UIJ69054.1 | 3-phosphoshikimate_1-carboxyvinyltransferase [Bacillus cereus]   | CPTF_Co         | 3557709.1   | 1127110.382 | 31.68079092 |
| UIJ69054.1 | 3-phosphoshikimate_1-carboxyvinyltransferase [Bacillus cereus]   | CPTF_Cu         | 2828070.2   | 112615.6673 | 3.982067605 |
| UIJ69054.1 | 3-phosphoshikimate_1-carboxyvinyltransferase [Bacillus cereus]   | CPTF_Fe         | 3013277.8   | 466907.4752 | 15.49500266 |
| UIJ69054.1 | 3-phosphoshikimate_1-carboxyvinyltransferase [Bacillus cereus]   | CPTF_Mn         | 3124873.867 | 698151.416  | 22.34174708 |
| UIJ69054.1 | 3-phosphoshikimate_1-carboxyvinyltransferase [Bacillus cereus]   | CPTF_Ni         | 2682254.733 | 824335.8523 | 30.73294427 |
| UIJ69054.1 | 3-phosphoshikimate_1-carboxyvinyltransferase [Bacillus cereus]   | CPTF_U          | 2540567.333 | 173456.4532 | 6.827469238 |

|            |                                                                                        |                 |             |             |             |
|------------|----------------------------------------------------------------------------------------|-----------------|-------------|-------------|-------------|
| UIJ69054.1 | 3-phosphoshikimate_1-carboxyvinyltransferase [Bacillus_cereus]                         | CPTF_metals_mix | 4574688.467 | 150954.8048 | 3.299783272 |
| UIJ69054.1 | 3-phosphoshikimate_1-carboxyvinyltransferase [Bacillus_cereus]                         | CPTF_zcontrol   | 2879315.133 | 162318.0111 | 5.637382627 |
| UIJ69055.1 | prephenate_dehydrogenase [Bacillus_cereus]                                             | CPTF_Al         | 308176.1    | 127477.1765 | 41.36504307 |
| UIJ69055.1 | prephenate_dehydrogenase [Bacillus_cereus]                                             | CPTF_Cd         | 297232.7    | 55899.20761 | 18.80654706 |
| UIJ69055.1 | prephenate_dehydrogenase [Bacillus_cereus]                                             | CPTF_Co         | 427696.8667 | 136390.1711 | 31.88944827 |
| UIJ69055.1 | prephenate_dehydrogenase [Bacillus_cereus]                                             | CPTF_Cu         | 386766.0333 | 46530.15288 | 12.03056858 |
| UIJ69055.1 | prephenate_dehydrogenase [Bacillus_cereus]                                             | CPTF_Fe         | 344894.6667 | 88763.22319 | 25.73632815 |
| UIJ69055.1 | prephenate_dehydrogenase [Bacillus_cereus]                                             | CPTF_Mn         | 301025.6667 | 77000.14087 | 25.57926097 |
| UIJ69055.1 | prephenate_dehydrogenase [Bacillus_cereus]                                             | CPTF_Ni         | 227094.3333 | 229322.0505 | 100.9809655 |
| UIJ69055.1 | prephenate_dehydrogenase [Bacillus_cereus]                                             | CPTF_U          | 307119.6667 | 154074.5008 | 50.16757879 |
| UIJ69055.1 | prephenate_dehydrogenase [Bacillus_cereus]                                             | CPTF_metals_mix | 205772.6667 | 48368.6296  | 23.5058574  |
| UIJ69055.1 | prephenate_dehydrogenase [Bacillus_cereus]                                             | CPTF_zcontrol   | 430330.9667 | 37393.02369 | 8.689363904 |
| UIJ69056.1 | histidinol-phosphate_transaminase [Bacillus_cereus]                                    | CPTF_Al         | 13350.9     | 23124.43713 | 173.2050808 |
| UIJ69056.1 | histidinol-phosphate_transaminase [Bacillus_cereus]                                    | CPTF_Cd         | 12352.73333 | 21395.56175 | 173.2050808 |
| UIJ69056.1 | histidinol-phosphate_transaminase [Bacillus_cereus]                                    | CPTF_Co         | 324144.6333 | 74657.60322 | 23.03218858 |
| UIJ69056.1 | histidinol-phosphate_transaminase [Bacillus_cereus]                                    | CPTF_Cu         | 77864.83333 | 134865.8475 | 173.2050808 |
| UIJ69056.1 | histidinol-phosphate_transaminase [Bacillus_cereus]                                    | CPTF_Fe         | 55220.16667 | 95644.13427 | 173.2050808 |
| UIJ69056.1 | histidinol-phosphate_transaminase [Bacillus_cereus]                                    | CPTF_Mn         | 63567.06667 | 61836.07157 | 97.27689952 |
| UIJ69056.1 | histidinol-phosphate_transaminase [Bacillus_cereus]                                    | CPTF_Ni         | 23484.83333 | 23088.56603 | 98.31266716 |
| UIJ69056.1 | histidinol-phosphate_transaminase [Bacillus_cereus]                                    | CPTF_U          | 27574.36667 | 47760.20405 | 173.2050808 |
| UIJ69056.1 | histidinol-phosphate_transaminase [Bacillus_cereus]                                    | CPTF_metals_mix | 589337.5    | 67657.7784  | 11.48031109 |
| UIJ69056.1 | histidinol-phosphate_transaminase [Bacillus_cereus]                                    | CPTF_zcontrol   | 80395.1     | 139248.3979 | 173.2050808 |
| UIJ69057.1 | chorismate_synthase [Bacillus_cereus]                                                  | CPTF_Al         | 179341.6667 | 195646.9899 | 109.0917652 |
| UIJ69057.1 | chorismate_synthase [Bacillus_cereus]                                                  | CPTF_Cd         | 505260.6667 | 64195.66743 | 12.70545516 |
| UIJ69057.1 | chorismate_synthase [Bacillus_cereus]                                                  | CPTF_Co         | 641267.2333 | 179007.1812 | 27.9145997  |
| UIJ69057.1 | chorismate_synthase [Bacillus_cereus]                                                  | CPTF_Cu         | 600885      | 83180.1656  | 13.84294259 |
| UIJ69057.1 | chorismate_synthase [Bacillus_cereus]                                                  | CPTF_Fe         | 293041.7333 | 260131.7772 | 88.76953268 |
| UIJ69057.1 | chorismate_synthase [Bacillus_cereus]                                                  | CPTF_Mn         | 379869.4333 | 165845.5498 | 43.65856668 |
| UIJ69057.1 | chorismate_synthase [Bacillus_cereus]                                                  | CPTF_Ni         | 540593.6667 | 98681.14204 | 18.25421719 |
| UIJ69057.1 | chorismate_synthase [Bacillus_cereus]                                                  | CPTF_U          | 278383.5667 | 199728.7366 | 71.74587891 |
| UIJ69057.1 | chorismate_synthase [Bacillus_cereus]                                                  | CPTF_metals_mix | 927406.1167 | 158933.1786 | 17.13738736 |
| UIJ69057.1 | chorismate_synthase [Bacillus_cereus]                                                  | CPTF_zcontrol   | 270456.6    | 159973.3661 | 59.14936671 |
| UIJ69058.1 | bifunctional_3-deoxy-7-phosphoheptulonate_synthase/chorismate_mutase [Bacillus_cereus] | CPTF_Al         | 10445937.07 | 711834.6976 | 6.814464734 |
| UIJ69058.1 | bifunctional_3-deoxy-7-phosphoheptulonate_synthase/chorismate_mutase [Bacillus_cereus] | CPTF_Cd         | 12173122.5  | 1168705.84  | 9.600707129 |
| UIJ69058.1 | bifunctional_3-deoxy-7-phosphoheptulonate_synthase/chorismate_mutase [Bacillus_cereus] | CPTF_Co         | 13584587.7  | 1214916.613 | 8.943345501 |
| UIJ69058.1 | bifunctional_3-deoxy-7-phosphoheptulonate_synthase/chorismate_mutase [Bacillus_cereus] | CPTF_Cu         | 11118556.97 | 477678.077  | 4.296223677 |
| UIJ69058.1 | bifunctional_3-deoxy-7-phosphoheptulonate_synthase/chorismate_mutase [Bacillus_cereus] | CPTF_Fe         | 10760603.67 | 909522.943  | 8.452341255 |
| UIJ69058.1 | bifunctional_3-deoxy-7-phosphoheptulonate_synthase/chorismate_mutase [Bacillus_cereus] | CPTF_Mn         | 10774987.93 | 2389755.387 | 22.17872912 |
| UIJ69058.1 | bifunctional_3-deoxy-7-phosphoheptulonate_synthase/chorismate_mutase [Bacillus_cereus] | CPTF_Ni         | 8734311.9   | 359017.2518 | 4.110423991 |
| UIJ69058.1 | bifunctional_3-deoxy-7-phosphoheptulonate_synthase/chorismate_mutase [Bacillus_cereus] | CPTF_U          | 9778829.467 | 398281.6374 | 4.072896851 |
| UIJ69058.1 | bifunctional_3-deoxy-7-phosphoheptulonate_synthase/chorismate_mutase [Bacillus_cereus] | CPTF_metals_mix | 15989759.7  | 1078435.315 | 6.744537346 |
| UIJ69058.1 | bifunctional_3-deoxy-7-phosphoheptulonate_synthase/chorismate_mutase [Bacillus_cereus] | CPTF_zcontrol   | 10279374.47 | 852695.58   | 8.295208846 |
| UIJ69065.1 | SH3_domain-containing_protein [Bacillus_cereus]                                        | CPTF_Al         | 0           | 0           | 0           |
| UIJ69065.1 | SH3_domain-containing_protein [Bacillus_cereus]                                        | CPTF_Cd         | 69706       | 120734.3336 | 173.2050808 |
| UIJ69065.1 | SH3_domain-containing_protein [Bacillus_cereus]                                        | CPTF_Co         | 0           | 0           | 0           |
| UIJ69065.1 | SH3_domain-containing_protein [Bacillus_cereus]                                        | CPTF_Cu         | 0           | 0           | 0           |
| UIJ69065.1 | SH3_domain-containing_protein [Bacillus_cereus]                                        | CPTF_Fe         | 0           | 0           | 0           |
| UIJ69065.1 | SH3_domain-containing_protein [Bacillus_cereus]                                        | CPTF_Mn         | 0           | 0           | 0           |
| UIJ69065.1 | SH3_domain-containing_protein [Bacillus_cereus]                                        | CPTF_Ni         | 0           | 0           | 0           |
| UIJ69065.1 | SH3_domain-containing_protein [Bacillus_cereus]                                        | CPTF_U          | 0           | 0           | 0           |
| UIJ69065.1 | SH3_domain-containing_protein [Bacillus_cereus]                                        | CPTF_metals_mix | 71779.76667 | 47622.81763 | 66.34574037 |
| UIJ69065.1 | SH3_domain-containing_protein [Bacillus_cereus]                                        | CPTF_zcontrol   | 0           | 0           | 0           |
| UIJ69070.1 | DUF2332_domain-containing_protein [Bacillus_cereus]                                    | CPTF_Al         | 2177257     | 102094.4775 | 4.689133048 |
| UIJ69070.1 | DUF2332_domain-containing_protein [Bacillus_cereus]                                    | CPTF_Cd         | 1997822.633 | 159339.0633 | 7.975636109 |
| UIJ69070.1 | DUF2332_domain-containing_protein [Bacillus_cereus]                                    | CPTF_Co         | 1634682.333 | 47845.85594 | 2.926920721 |
| UIJ69070.1 | DUF2332_domain-containing_protein [Bacillus_cereus]                                    | CPTF_Cu         | 1989832.4   | 195460.0762 | 9.822941679 |
| UIJ69070.1 | DUF2332_domain-containing_protein [Bacillus_cereus]                                    | CPTF_Fe         | 1824054.567 | 286203.22   | 15.69049662 |
| UIJ69070.1 | DUF2332_domain-containing_protein [Bacillus_cereus]                                    | CPTF_Mn         | 1794594.667 | 249762.7264 | 13.91750076 |
| UIJ69070.1 | DUF2332_domain-containing_protein [Bacillus_cereus]                                    | CPTF_Ni         | 1821642.533 | 28937.55421 | 1.588541862 |
| UIJ69070.1 | DUF2332_domain-containing_protein [Bacillus_cereus]                                    | CPTF_U          | 1767269.533 | 521583.4615 | 29.51352081 |
| UIJ69070.1 | DUF2332_domain-containing_protein [Bacillus_cereus]                                    | CPTF_metals_mix | 1025036.2   | 114205.1142 | 11.14156887 |

|            |                                                          |                 |             |             |             |
|------------|----------------------------------------------------------|-----------------|-------------|-------------|-------------|
| UIJ69070.1 | DUF2332_domain-containing_protein_[Bacillus_cereus]      | CPTF_zcontrol   | 1569063.2   | 39755.38017 | 2.533701649 |
| UIJ69071.1 | malate:quinone_oxidoreductase_[Bacillus_cereus]          | CPTF_Al         | 2111459.667 | 459489.9203 | 21.76171904 |
| UIJ69071.1 | malate:quinone_oxidoreductase_[Bacillus_cereus]          | CPTF_Cd         | 1695123.867 | 395685.1377 | 23.34255009 |
| UIJ69071.1 | malate:quinone_oxidoreductase_[Bacillus_cereus]          | CPTF_Co         | 1978376.473 | 452615.6992 | 22.87813797 |
| UIJ69071.1 | malate:quinone_oxidoreductase_[Bacillus_cereus]          | CPTF_Cu         | 1623959.9   | 79119.31497 | 4.8719993   |
| UIJ69071.1 | malate:quinone_oxidoreductase_[Bacillus_cereus]          | CPTF_Fe         | 1848253.267 | 517082.6405 | 27.97682816 |
| UIJ69071.1 | malate:quinone_oxidoreductase_[Bacillus_cereus]          | CPTF_Mn         | 1424047.133 | 136097.7163 | 9.557107566 |
| UIJ69071.1 | malate:quinone_oxidoreductase_[Bacillus_cereus]          | CPTF_Ni         | 1674695.667 | 37770.71649 | 2.255377932 |
| UIJ69071.1 | malate:quinone_oxidoreductase_[Bacillus_cereus]          | CPTF_U          | 1483520.5   | 380143.2914 | 25.62440434 |
| UIJ69071.1 | malate:quinone_oxidoreductase_[Bacillus_cereus]          | CPTF_metals_mix | 2637182.367 | 26490.80906 | 1.004511838 |
| UIJ69071.1 | malate:quinone_oxidoreductase_[Bacillus_cereus]          | CPTF_zcontrol   | 1560263.933 | 227563.5237 | 14.58493777 |
| UIJ69081.1 | heme-degrading_monooxygenase_HmoA_[Bacillus_cereus]      | CPTF_Al         | 199360.3333 | 38450.93518 | 19.28715434 |
| UIJ69081.1 | heme-degrading_monooxygenase_HmoA_[Bacillus_cereus]      | CPTF_Cd         | 309970.5    | 54925.168   | 17.71948234 |
| UIJ69081.1 | heme-degrading_monooxygenase_HmoA_[Bacillus_cereus]      | CPTF_Co         | 347949.7333 | 113498.7836 | 32.61930466 |
| UIJ69081.1 | heme-degrading_monooxygenase_HmoA_[Bacillus_cereus]      | CPTF_Cu         | 2316818.9   | 125237.6846 | 5.405588005 |
| UIJ69081.1 | heme-degrading_monooxygenase_HmoA_[Bacillus_cereus]      | CPTF_Fe         | 201642.4    | 93847.95094 | 46.54177442 |
| UIJ69081.1 | heme-degrading_monooxygenase_HmoA_[Bacillus_cereus]      | CPTF_Mn         | 196181.3    | 38550.59344 | 19.65049342 |
| UIJ69081.1 | heme-degrading_monooxygenase_HmoA_[Bacillus_cereus]      | CPTF_Ni         | 198482.0333 | 22235.04127 | 11.20254609 |
| UIJ69081.1 | heme-degrading_monooxygenase_HmoA_[Bacillus_cereus]      | CPTF_U          | 229183.3333 | 72859.12658 | 31.79076136 |
| UIJ69081.1 | heme-degrading_monooxygenase_HmoA_[Bacillus_cereus]      | CPTF_metals_mix | 4089762.8   | 141660.5523 | 3.463784068 |
| UIJ69081.1 | heme-degrading_monooxygenase_HmoA_[Bacillus_cereus]      | CPTF_zcontrol   | 170489.3333 | 1144.07794  | 0.671055437 |
| UIJ69085.1 | glutamate-5-semialdehyde_dehydrogenase_[Bacillus_cereus] | CPTF_Al         | 0           | 0           | 0           |
| UIJ69085.1 | glutamate-5-semialdehyde_dehydrogenase_[Bacillus_cereus] | CPTF_Cd         | 309919.9    | 272966.5123 | 88.07647147 |
| UIJ69085.1 | glutamate-5-semialdehyde_dehydrogenase_[Bacillus_cereus] | CPTF_Co         | 141473      | 245038.4239 | 173.2050808 |
| UIJ69085.1 | glutamate-5-semialdehyde_dehydrogenase_[Bacillus_cereus] | CPTF_Cu         | 245159.3333 | 218304.016  | 89.04576997 |
| UIJ69085.1 | glutamate-5-semialdehyde_dehydrogenase_[Bacillus_cereus] | CPTF_Fe         | 158066      | 209789.6468 | 132.7228163 |
| UIJ69085.1 | glutamate-5-semialdehyde_dehydrogenase_[Bacillus_cereus] | CPTF_Mn         | 85877.4     | 100223.44   | 116.7052566 |
| UIJ69085.1 | glutamate-5-semialdehyde_dehydrogenase_[Bacillus_cereus] | CPTF_Ni         | 161607.3333 | 175401.4958 | 108.5356043 |
| UIJ69085.1 | glutamate-5-semialdehyde_dehydrogenase_[Bacillus_cereus] | CPTF_U          | 46555       | 80635.62535 | 173.2050808 |
| UIJ69085.1 | glutamate-5-semialdehyde_dehydrogenase_[Bacillus_cereus] | CPTF_metals_mix | 30088.6     | 26078.31765 | 86.67175492 |
| UIJ69085.1 | glutamate-5-semialdehyde_dehydrogenase_[Bacillus_cereus] | CPTF_zcontrol   | 59034.33333 | 102250.4647 | 173.2050808 |
| UIJ69088.1 | M20_family_metallopeptidase_[Bacillus_cereus]            | CPTF_Al         | 411528      | 393933.2177 | 95.72452365 |
| UIJ69088.1 | M20_family_metallopeptidase_[Bacillus_cereus]            | CPTF_Cd         | 497229.3333 | 630086.786  | 126.7195525 |
| UIJ69088.1 | M20_family_metallopeptidase_[Bacillus_cereus]            | CPTF_Co         | 565631.9    | 591015.3862 | 104.4876334 |
| UIJ69088.1 | M20_family_metallopeptidase_[Bacillus_cereus]            | CPTF_Cu         | 376302.8    | 433309.3812 | 115.1491249 |
| UIJ69088.1 | M20_family_metallopeptidase_[Bacillus_cereus]            | CPTF_Fe         | 569185.8333 | 385426.49   | 67.71540461 |
| UIJ69088.1 | M20_family_metallopeptidase_[Bacillus_cereus]            | CPTF_Mn         | 234896      | 281453.7941 | 119.8205989 |
| UIJ69088.1 | M20_family_metallopeptidase_[Bacillus_cereus]            | CPTF_Ni         | 483798.3333 | 196901.9314 | 40.69917523 |
| UIJ69088.1 | M20_family_metallopeptidase_[Bacillus_cereus]            | CPTF_U          | 205980      | 263150.8422 | 127.7555307 |
| UIJ69088.1 | M20_family_metallopeptidase_[Bacillus_cereus]            | CPTF_metals_mix | 217498.2667 | 234063.5242 | 107.6162711 |
| UIJ69088.1 | M20_family_metallopeptidase_[Bacillus_cereus]            | CPTF_zcontrol   | 265331.3333 | 32125.18673 | 12.1075737  |
| UIJ69092.1 | immune_inhibitor_A_[Bacillus_cereus]                     | CPTF_Al         | 1535332.667 | 342230.2892 | 22.29030207 |
| UIJ69092.1 | immune_inhibitor_A_[Bacillus_cereus]                     | CPTF_Cd         | 2269849.3   | 952455.6269 | 41.96118337 |
| UIJ69092.1 | immune_inhibitor_A_[Bacillus_cereus]                     | CPTF_Co         | 2243560.567 | 749012.5538 | 33.3849937  |
| UIJ69092.1 | immune_inhibitor_A_[Bacillus_cereus]                     | CPTF_Cu         | 734355.4    | 148659.3934 | 20.24352151 |
| UIJ69092.1 | immune_inhibitor_A_[Bacillus_cereus]                     | CPTF_Fe         | 1642620.9   | 710541.7498 | 43.25658768 |
| UIJ69092.1 | immune_inhibitor_A_[Bacillus_cereus]                     | CPTF_Mn         | 1552903.767 | 241435.7184 | 15.54737155 |
| UIJ69092.1 | immune_inhibitor_A_[Bacillus_cereus]                     | CPTF_Ni         | 1765825.433 | 574815.9168 | 32.55225041 |
| UIJ69092.1 | immune_inhibitor_A_[Bacillus_cereus]                     | CPTF_U          | 1431490.8   | 785048.9902 | 54.84135771 |
| UIJ69092.1 | immune_inhibitor_A_[Bacillus_cereus]                     | CPTF_metals_mix | 225117.4    | 61030.74014 | 27.11062767 |
| UIJ69092.1 | immune_inhibitor_A_[Bacillus_cereus]                     | CPTF_zcontrol   | 1628162.733 | 289287.121  | 17.76770313 |
| UIJ69098.1 | HAD-IA_family_hydrolase_[Bacillus_cereus]                | CPTF_Al         | 610748.1333 | 302795.2282 | 49.57775746 |
| UIJ69098.1 | HAD-IA_family_hydrolase_[Bacillus_cereus]                | CPTF_Cd         | 750433.4333 | 509073.8176 | 67.83730509 |
| UIJ69098.1 | HAD-IA_family_hydrolase_[Bacillus_cereus]                | CPTF_Co         | 654338.6667 | 66103.36505 | 10.1023168  |
| UIJ69098.1 | HAD-IA_family_hydrolase_[Bacillus_cereus]                | CPTF_Cu         | 573274      | 245902.5801 | 42.89442398 |
| UIJ69098.1 | HAD-IA_family_hydrolase_[Bacillus_cereus]                | CPTF_Fe         | 588600      | 178942.4665 | 30.40137045 |
| UIJ69098.1 | HAD-IA_family_hydrolase_[Bacillus_cereus]                | CPTF_Mn         | 446644      | 311792.8834 | 69.80791937 |
| UIJ69098.1 | HAD-IA_family_hydrolase_[Bacillus_cereus]                | CPTF_Ni         | 266589.0667 | 84756.34163 | 31.79287984 |
| UIJ69098.1 | HAD-IA_family_hydrolase_[Bacillus_cereus]                | CPTF_U          | 286919.7    | 224742.9515 | 78.3295645  |
| UIJ69098.1 | HAD-IA_family_hydrolase_[Bacillus_cereus]                | CPTF_metals_mix | 317673      | 218092.7067 | 68.65320838 |
| UIJ69098.1 | HAD-IA_family_hydrolase_[Bacillus_cereus]                | CPTF_zcontrol   | 348733.3333 | 302467.7581 | 86.73325122 |

|            |                                                                              |                 |             |             |             |
|------------|------------------------------------------------------------------------------|-----------------|-------------|-------------|-------------|
| UIJ69099.1 | hypothetical_protein_LW858_13180 [Bacillus cereus]                           | CPTF_Al         | 11313.66667 | 19595.84549 | 173.2050808 |
| UIJ69099.1 | hypothetical_protein_LW858_13180 [Bacillus cereus]                           | CPTF_Cd         | 28959.46667 | 25908.88918 | 89.46604396 |
| UIJ69099.1 | hypothetical_protein_LW858_13180 [Bacillus cereus]                           | CPTF_Co         | 23376.6     | 4266.314722 | 18.25036456 |
| UIJ69099.1 | hypothetical_protein_LW858_13180 [Bacillus cereus]                           | CPTF_Cu         | 9096.633333 | 15755.83111 | 173.2050808 |
| UIJ69099.1 | hypothetical_protein_LW858_13180 [Bacillus cereus]                           | CPTF_Fe         | 13533.53333 | 23440.76734 | 173.2050808 |
| UIJ69099.1 | hypothetical_protein_LW858_13180 [Bacillus cereus]                           | CPTF_Mn         | 6173.8      | 10693.33528 | 173.2050808 |
| UIJ69099.1 | hypothetical_protein_LW858_13180 [Bacillus cereus]                           | CPTF_Ni         | 0           | 0           | 0           |
| UIJ69099.1 | hypothetical_protein_LW858_13180 [Bacillus cereus]                           | CPTF_U          | 0           | 0           | 0           |
| UIJ69099.1 | hypothetical_protein_LW858_13180 [Bacillus cereus]                           | CPTF_metals_mix | 67014.96667 | 24415.12981 | 36.43235389 |
| UIJ69099.1 | hypothetical_protein_LW858_13180 [Bacillus cereus]                           | CPTF_zcontrol   | 0           | 0           | 0           |
| UIJ69100.1 | GNAT_family_N-acetyltransferase [Bacillus cereus]                            | CPTF_Al         | 455303.7    | 219395.6616 | 48.18666344 |
| UIJ69100.1 | GNAT_family_N-acetyltransferase [Bacillus cereus]                            | CPTF_Cd         | 494757      | 300590.6225 | 60.75520357 |
| UIJ69100.1 | GNAT_family_N-acetyltransferase [Bacillus cereus]                            | CPTF_Co         | 312878.6    | 277421.806  | 88.66755539 |
| UIJ69100.1 | GNAT_family_N-acetyltransferase [Bacillus cereus]                            | CPTF_Cu         | 112733.2667 | 155157.7945 | 137.6326608 |
| UIJ69100.1 | GNAT_family_N-acetyltransferase [Bacillus cereus]                            | CPTF_Fe         | 0           | 0           | 0           |
| UIJ69100.1 | GNAT_family_N-acetyltransferase [Bacillus cereus]                            | CPTF_Mn         | 464528.2667 | 196359.777  | 42.27079191 |
| UIJ69100.1 | GNAT_family_N-acetyltransferase [Bacillus cereus]                            | CPTF_Ni         | 9219.933333 | 15969.39298 | 173.2050808 |
| UIJ69100.1 | GNAT_family_N-acetyltransferase [Bacillus cereus]                            | CPTF_U          | 134566.3333 | 233075.7263 | 173.2050808 |
| UIJ69100.1 | GNAT_family_N-acetyltransferase [Bacillus cereus]                            | CPTF_metals_mix | 0           | 0           | 0           |
| UIJ69100.1 | GNAT_family_N-acetyltransferase [Bacillus cereus]                            | CPTF_zcontrol   | 148736.3667 | 226255.978  | 152.1188013 |
| UIJ69101.1 | glyoxalase/bleomycin_resistance/dioxygenase_family_protein [Bacillus cereus] | CPTF_Al         | 493948      | 236310.2533 | 47.84111957 |
| UIJ69101.1 | glyoxalase/bleomycin_resistance/dioxygenase_family_protein [Bacillus cereus] | CPTF_Cd         | 403813      | 45004.25954 | 11.14482682 |
| UIJ69101.1 | glyoxalase/bleomycin_resistance/dioxygenase_family_protein [Bacillus cereus] | CPTF_Co         | 518884      | 100887.2357 | 19.44311941 |
| UIJ69101.1 | glyoxalase/bleomycin_resistance/dioxygenase_family_protein [Bacillus cereus] | CPTF_Cu         | 510017      | 79332.07552 | 15.55479043 |
| UIJ69101.1 | glyoxalase/bleomycin_resistance/dioxygenase_family_protein [Bacillus cereus] | CPTF_Fe         | 393069.6667 | 98491.68617 | 25.05705592 |
| UIJ69101.1 | glyoxalase/bleomycin_resistance/dioxygenase_family_protein [Bacillus cereus] | CPTF_Mn         | 482242      | 206702.0001 | 42.8627121  |
| UIJ69101.1 | glyoxalase/bleomycin_resistance/dioxygenase_family_protein [Bacillus cereus] | CPTF_Ni         | 575541.6667 | 28089.48033 | 4.880529414 |
| UIJ69101.1 | glyoxalase/bleomycin_resistance/dioxygenase_family_protein [Bacillus cereus] | CPTF_U          | 572526      | 349308.4031 | 61.01179739 |
| UIJ69101.1 | glyoxalase/bleomycin_resistance/dioxygenase_family_protein [Bacillus cereus] | CPTF_metals_mix | 355135.3333 | 41223.85831 | 11.60792927 |
| UIJ69101.1 | glyoxalase/bleomycin_resistance/dioxygenase_family_protein [Bacillus cereus] | CPTF_zcontrol   | 642869      | 12591.68619 | 1.958670613 |
| UIJ69138.1 | hypothetical_protein_LW858_13400 [Bacillus cereus]                           | CPTF_Al         | 2197304.2   | 872945.4493 | 39.72801987 |
| UIJ69138.1 | hypothetical_protein_LW858_13400 [Bacillus cereus]                           | CPTF_Cd         | 1646518.933 | 418204.0381 | 25.3992851  |
| UIJ69138.1 | hypothetical_protein_LW858_13400 [Bacillus cereus]                           | CPTF_Co         | 2203167.433 | 631764.3545 | 28.67527655 |
| UIJ69138.1 | hypothetical_protein_LW858_13400 [Bacillus cereus]                           | CPTF_Cu         | 2539907.133 | 658154.5064 | 25.91254215 |
| UIJ69138.1 | hypothetical_protein_LW858_13400 [Bacillus cereus]                           | CPTF_Fe         | 2259478.9   | 423189.3944 | 18.72951301 |
| UIJ69138.1 | hypothetical_protein_LW858_13400 [Bacillus cereus]                           | CPTF_Mn         | 1831818.6   | 828671.6951 | 45.23765045 |
| UIJ69138.1 | hypothetical_protein_LW858_13400 [Bacillus cereus]                           | CPTF_Ni         | 1776646.933 | 729164.0652 | 41.04158522 |
| UIJ69138.1 | hypothetical_protein_LW858_13400 [Bacillus cereus]                           | CPTF_U          | 1423832.167 | 781714.4009 | 54.90214501 |
| UIJ69138.1 | hypothetical_protein_LW858_13400 [Bacillus cereus]                           | CPTF_metals_mix | 1874481.067 | 627462.7461 | 33.47394419 |
| UIJ69138.1 | hypothetical_protein_LW858_13400 [Bacillus cereus]                           | CPTF_zcontrol   | 2578969.7   | 78068.93738 | 3.027136665 |
| UIJ69139.1 | cytoplasmic_protein [Bacillus cereus]                                        | CPTF_Al         | 690727.3333 | 144641.9914 | 20.94053391 |
| UIJ69139.1 | cytoplasmic_protein [Bacillus cereus]                                        | CPTF_Cd         | 739242.7333 | 98030.72428 | 13.26096556 |
| UIJ69139.1 | cytoplasmic_protein [Bacillus cereus]                                        | CPTF_Co         | 702426.7667 | 121630.1101 | 17.31569978 |
| UIJ69139.1 | cytoplasmic_protein [Bacillus cereus]                                        | CPTF_Cu         | 672710.8667 | 82371.65823 | 12.2447343  |
| UIJ69139.1 | cytoplasmic_protein [Bacillus cereus]                                        | CPTF_Fe         | 667391.0667 | 185083.7136 | 27.732423   |
| UIJ69139.1 | cytoplasmic_protein [Bacillus cereus]                                        | CPTF_Mn         | 569227.1667 | 61273.7734  | 10.76437967 |
| UIJ69139.1 | cytoplasmic_protein [Bacillus cereus]                                        | CPTF_Ni         | 535876.3667 | 73774.60018 | 13.76709345 |
| UIJ69139.1 | cytoplasmic_protein [Bacillus cereus]                                        | CPTF_U          | 595811      | 17814.32814 | 2.98992938  |
| UIJ69139.1 | cytoplasmic_protein [Bacillus cereus]                                        | CPTF_metals_mix | 548068.3667 | 129951.6161 | 23.71084047 |
| UIJ69139.1 | cytoplasmic_protein [Bacillus cereus]                                        | CPTF_zcontrol   | 570823.5333 | 58319.71606 | 10.21676799 |
| UIJ69140.1 | DUF3958_family_protein [Bacillus cereus]                                     | CPTF_Al         | 352119      | 41872.62446 | 11.89161177 |
| UIJ69140.1 | DUF3958_family_protein [Bacillus cereus]                                     | CPTF_Cd         | 102541.3333 | 177606.7992 | 173.2050808 |
| UIJ69140.1 | DUF3958_family_protein [Bacillus cereus]                                     | CPTF_Co         | 211030.6667 | 183461.0665 | 86.93573753 |
| UIJ69140.1 | DUF3958_family_protein [Bacillus cereus]                                     | CPTF_Cu         | 276606.3333 | 12774.56447 | 4.618319586 |
| UIJ69140.1 | DUF3958_family_protein [Bacillus cereus]                                     | CPTF_Fe         | 116628.6667 | 202006.7763 | 173.2050808 |
| UIJ69140.1 | DUF3958_family_protein [Bacillus cereus]                                     | CPTF_Mn         | 221306.6667 | 193394.0843 | 87.38737393 |
| UIJ69140.1 | DUF3958_family_protein [Bacillus cereus]                                     | CPTF_Ni         | 268102.6667 | 19122.85398 | 7.132660864 |
| UIJ69140.1 | DUF3958_family_protein [Bacillus cereus]                                     | CPTF_U          | 82831       | 143467.5004 | 173.2050808 |
| UIJ69140.1 | DUF3958_family_protein [Bacillus cereus]                                     | CPTF_metals_mix | 0           | 0           | 0           |
| UIJ69140.1 | DUF3958_family_protein [Bacillus cereus]                                     | CPTF_zcontrol   | 251878      | 218259.7949 | 86.65298078 |
| UIJ69142.1 | antibiotic_biosynthesis_monooxygenase [Bacillus cereus]                      | CPTF_Al         | 299299.3333 | 47635.08628 | 15.91553371 |



|            |                                                         |                 |             |             |             |
|------------|---------------------------------------------------------|-----------------|-------------|-------------|-------------|
| UIJ69142.1 | antibiotic_biosynthesis_monooxygenase_[Bacillus_cereus] | CPTF_Cd         | 243246      | 42102.059   | 17.30842809 |
| UIJ69142.1 | antibiotic_biosynthesis_monooxygenase_[Bacillus_cereus] | CPTF_Co         | 296218.6667 | 22886.11003 | 7.72608637  |
| UIJ69142.1 | antibiotic_biosynthesis_monooxygenase_[Bacillus_cereus] | CPTF_Cu         | 274650.3333 | 5643.560608 | 2.054816588 |
| UIJ69142.1 | antibiotic_biosynthesis_monooxygenase_[Bacillus_cereus] | CPTF_Fe         | 271789.6667 | 14886.52187 | 5.47722143  |
| UIJ69142.1 | antibiotic_biosynthesis_monooxygenase_[Bacillus_cereus] | CPTF_Mn         | 274884      | 49816.6453  | 18.12278827 |
| UIJ69142.1 | antibiotic_biosynthesis_monooxygenase_[Bacillus_cereus] | CPTF_Ni         | 204486.3333 | 178384.8711 | 87.23559575 |
| UIJ69142.1 | antibiotic_biosynthesis_monooxygenase_[Bacillus_cereus] | CPTF_U          | 76477.66667 | 132463.2043 | 173.2050808 |
| UIJ69142.1 | antibiotic_biosynthesis_monooxygenase_[Bacillus_cereus] | CPTF_metals_mix | 140871.3333 | 122747.2241 | 87.13428145 |
| UIJ69142.1 | antibiotic_biosynthesis_monooxygenase_[Bacillus_cereus] | CPTF_zcontrol   | 306212.6667 | 37077.00911 | 12.10825454 |
| UIJ69148.1 | DUF4240_domain-containing_protein_[Bacillus_cereus]     | CPTF_Al         | 0           | 0           | 0           |
| UIJ69148.1 | DUF4240_domain-containing_protein_[Bacillus_cereus]     | CPTF_Cd         | 0           | 0           | 0           |
| UIJ69148.1 | DUF4240_domain-containing_protein_[Bacillus_cereus]     | CPTF_Co         | 29851.4     | 51704.14148 | 173.2050808 |
| UIJ69148.1 | DUF4240_domain-containing_protein_[Bacillus_cereus]     | CPTF_Cu         | 0           | 0           | 0           |
| UIJ69148.1 | DUF4240_domain-containing_protein_[Bacillus_cereus]     | CPTF_Fe         | 0           | 0           | 0           |
| UIJ69148.1 | DUF4240_domain-containing_protein_[Bacillus_cereus]     | CPTF_Mn         | 0           | 0           | 0           |
| UIJ69148.1 | DUF4240_domain-containing_protein_[Bacillus_cereus]     | CPTF_Ni         | 0           | 0           | 0           |
| UIJ69148.1 | DUF4240_domain-containing_protein_[Bacillus_cereus]     | CPTF_U          | 0           | 0           | 0           |
| UIJ69148.1 | DUF4240_domain-containing_protein_[Bacillus_cereus]     | CPTF_metals_mix | 0           | 0           | 0           |
| UIJ69148.1 | DUF4240_domain-containing_protein_[Bacillus_cereus]     | CPTF_zcontrol   | 0           | 0           | 0           |
| UIJ69162.1 | DUF2785_domain-containing_protein_[Bacillus_cereus]     | CPTF_Al         | 0           | 0           | 0           |
| UIJ69162.1 | DUF2785_domain-containing_protein_[Bacillus_cereus]     | CPTF_Cd         | 0           | 0           | 0           |
| UIJ69162.1 | DUF2785_domain-containing_protein_[Bacillus_cereus]     | CPTF_Co         | 7992.466667 | 13843.35834 | 173.2050808 |
| UIJ69162.1 | DUF2785_domain-containing_protein_[Bacillus_cereus]     | CPTF_Cu         | 16634.96667 | 28812.60745 | 173.2050808 |
| UIJ69162.1 | DUF2785_domain-containing_protein_[Bacillus_cereus]     | CPTF_Fe         | 22295.1     | 38616.24596 | 173.2050808 |
| UIJ69162.1 | DUF2785_domain-containing_protein_[Bacillus_cereus]     | CPTF_Mn         | 0           | 0           | 0           |
| UIJ69162.1 | DUF2785_domain-containing_protein_[Bacillus_cereus]     | CPTF_Ni         | 26153.63333 | 27619.79841 | 105.6059709 |
| UIJ69162.1 | DUF2785_domain-containing_protein_[Bacillus_cereus]     | CPTF_U          | 0           | 0           | 0           |
| UIJ69162.1 | DUF2785_domain-containing_protein_[Bacillus_cereus]     | CPTF_metals_mix | 12217.6     | 21161.50395 | 173.2050808 |
| UIJ69162.1 | DUF2785_domain-containing_protein_[Bacillus_cereus]     | CPTF_zcontrol   | 0           | 0           | 0           |
| UIJ69164.1 | metallophosphatase_family_protein_[Bacillus_cereus]     | CPTF_Al         | 49010.56667 | 45980.80767 | 93.81815147 |
| UIJ69164.1 | metallophosphatase_family_protein_[Bacillus_cereus]     | CPTF_Cd         | 75285       | 65897.40427 | 87.53058945 |
| UIJ69164.1 | metallophosphatase_family_protein_[Bacillus_cereus]     | CPTF_Co         | 35038.3     | 32785.63404 | 93.57084689 |
| UIJ69164.1 | metallophosphatase_family_protein_[Bacillus_cereus]     | CPTF_Cu         | 0           | 0           | 0           |
| UIJ69164.1 | metallophosphatase_family_protein_[Bacillus_cereus]     | CPTF_Fe         | 44274.33333 | 76685.3948  | 173.2050808 |
| UIJ69164.1 | metallophosphatase_family_protein_[Bacillus_cereus]     | CPTF_Mn         | 55334.33333 | 54046.19696 | 97.67208478 |
| UIJ69164.1 | metallophosphatase_family_protein_[Bacillus_cereus]     | CPTF_Ni         | 0           | 0           | 0           |
| UIJ69164.1 | metallophosphatase_family_protein_[Bacillus_cereus]     | CPTF_U          | 23321.66667 | 40394.31158 | 173.2050808 |
| UIJ69164.1 | metallophosphatase_family_protein_[Bacillus_cereus]     | CPTF_metals_mix | 54077.5     | 47113.31124 | 87.1218367  |
| UIJ69164.1 | metallophosphatase_family_protein_[Bacillus_cereus]     | CPTF_zcontrol   | 62706.33333 | 57675.06593 | 91.97646054 |
| UIJ69182.1 | DUF979_domain-containing_protein_[Bacillus_cereus]      | CPTF_Al         | 0           | 0           | 0           |
| UIJ69182.1 | DUF979_domain-containing_protein_[Bacillus_cereus]      | CPTF_Cd         | 0           | 0           | 0           |
| UIJ69182.1 | DUF979_domain-containing_protein_[Bacillus_cereus]      | CPTF_Co         | 0           | 0           | 0           |
| UIJ69182.1 | DUF979_domain-containing_protein_[Bacillus_cereus]      | CPTF_Cu         | 0           | 0           | 0           |
| UIJ69182.1 | DUF979_domain-containing_protein_[Bacillus_cereus]      | CPTF_Fe         | 0           | 0           | 0           |
| UIJ69182.1 | DUF979_domain-containing_protein_[Bacillus_cereus]      | CPTF_Mn         | 0           | 0           | 0           |
| UIJ69182.1 | DUF979_domain-containing_protein_[Bacillus_cereus]      | CPTF_Ni         | 220343.3333 | 381645.8484 | 173.2050808 |
| UIJ69182.1 | DUF979_domain-containing_protein_[Bacillus_cereus]      | CPTF_U          | 0           | 0           | 0           |
| UIJ69182.1 | DUF979_domain-containing_protein_[Bacillus_cereus]      | CPTF_metals_mix | 0           | 0           | 0           |
| UIJ69182.1 | DUF979_domain-containing_protein_[Bacillus_cereus]      | CPTF_zcontrol   | 232236.6667 | 402245.706  | 173.2050808 |
| UIJ69188.1 | signal_peptidase_I_[Bacillus_cereus]                    | CPTF_Al         | 0           | 0           | 0           |
| UIJ69188.1 | signal_peptidase_I_[Bacillus_cereus]                    | CPTF_Cd         | 0           | 0           | 0           |
| UIJ69188.1 | signal_peptidase_I_[Bacillus_cereus]                    | CPTF_Co         | 0           | 0           | 0           |
| UIJ69188.1 | signal_peptidase_I_[Bacillus_cereus]                    | CPTF_Cu         | 84188.6     | 8169.905301 | 9.704289299 |
| UIJ69188.1 | signal_peptidase_I_[Bacillus_cereus]                    | CPTF_Fe         | 12563.8     | 21761.13994 | 173.2050808 |
| UIJ69188.1 | signal_peptidase_I_[Bacillus_cereus]                    | CPTF_Mn         | 0           | 0           | 0           |
| UIJ69188.1 | signal_peptidase_I_[Bacillus_cereus]                    | CPTF_Ni         | 33960.93333 | 31136.63198 | 91.6836757  |
| UIJ69188.1 | signal_peptidase_I_[Bacillus_cereus]                    | CPTF_U          | 0           | 0           | 0           |
| UIJ69188.1 | signal_peptidase_I_[Bacillus_cereus]                    | CPTF_metals_mix | 164071.9333 | 20803.81679 | 12.6796926  |
| UIJ69188.1 | signal_peptidase_I_[Bacillus_cereus]                    | CPTF_zcontrol   | 0           | 0           | 0           |
| UIJ69189.1 | copper_homeostasis_protein_CutC_[Bacillus_cereus]       | CPTF_Al         | 0           | 0           | 0           |
| UIJ69189.1 | copper_homeostasis_protein_CutC_[Bacillus_cereus]       | CPTF_Cd         | 0           | 0           | 0           |

|            |                                                         |                 |             |             |             |
|------------|---------------------------------------------------------|-----------------|-------------|-------------|-------------|
| UIJ69189.1 | copper_homeostasis_protein_CutC_[Bacillus_cereus]       | CPTF_Co         | 0           | 0           | 0           |
| UIJ69189.1 | copper_homeostasis_protein_CutC_[Bacillus_cereus]       | CPTF_Cu         | 0           | 0           | 0           |
| UIJ69189.1 | copper_homeostasis_protein_CutC_[Bacillus_cereus]       | CPTF_Fe         | 0           | 0           | 0           |
| UIJ69189.1 | copper_homeostasis_protein_CutC_[Bacillus_cereus]       | CPTF_Mn         | 0           | 0           | 0           |
| UIJ69189.1 | copper_homeostasis_protein_CutC_[Bacillus_cereus]       | CPTF_Ni         | 0           | 0           | 0           |
| UIJ69189.1 | copper_homeostasis_protein_CutC_[Bacillus_cereus]       | CPTF_U          | 0           | 0           | 0           |
| UIJ69189.1 | copper_homeostasis_protein_CutC_[Bacillus_cereus]       | CPTF_metals_mix | 559440.2667 | 213202.6028 | 38.1099852  |
| UIJ69189.1 | copper_homeostasis_protein_CutC_[Bacillus_cereus]       | CPTF_zcontrol   | 0           | 0           | 0           |
| UIJ69192.1 | acyl-CoA/acyl-ACP_dehydrogenase_[Bacillus_cereus]       | CPTF_Al         | 229074.3333 | 198923.1685 | 86.83782491 |
| UIJ69192.1 | acyl-CoA/acyl-ACP_dehydrogenase_[Bacillus_cereus]       | CPTF_Cd         | 280475.6667 | 71466.10633 | 25.48032319 |
| UIJ69192.1 | acyl-CoA/acyl-ACP_dehydrogenase_[Bacillus_cereus]       | CPTF_Co         | 276245.5333 | 103448.5046 | 37.44802797 |
| UIJ69192.1 | acyl-CoA/acyl-ACP_dehydrogenase_[Bacillus_cereus]       | CPTF_Cu         | 340703.5667 | 15262.48233 | 4.479695495 |
| UIJ69192.1 | acyl-CoA/acyl-ACP_dehydrogenase_[Bacillus_cereus]       | CPTF_Fe         | 185564      | 165515.5626 | 89.19594457 |
| UIJ69192.1 | acyl-CoA/acyl-ACP_dehydrogenase_[Bacillus_cereus]       | CPTF_Mn         | 156416      | 156485.0456 | 100.0441423 |
| UIJ69192.1 | acyl-CoA/acyl-ACP_dehydrogenase_[Bacillus_cereus]       | CPTF_Ni         | 230620.0333 | 47749.88834 | 20.70500453 |
| UIJ69192.1 | acyl-CoA/acyl-ACP_dehydrogenase_[Bacillus_cereus]       | CPTF_U          | 206707.8333 | 181522.5509 | 87.816      |
| UIJ69192.1 | acyl-CoA/acyl-ACP_dehydrogenase_[Bacillus_cereus]       | CPTF_metals_mix | 403787.0667 | 43568.4277  | 10.78995126 |
| UIJ69192.1 | acyl-CoA/acyl-ACP_dehydrogenase_[Bacillus_cereus]       | CPTF_zcontrol   | 248941.3333 | 41648.09722 | 16.73008522 |
| UIJ69213.1 | LacI_family_transcriptional_regulator_[Bacillus_cereus] | CPTF_Al         | 22199.1     | 38449.96908 | 173.2050808 |
| UIJ69213.1 | LacI_family_transcriptional_regulator_[Bacillus_cereus] | CPTF_Cd         | 0           | 0           | 0           |
| UIJ69213.1 | LacI_family_transcriptional_regulator_[Bacillus_cereus] | CPTF_Co         | 22611.9     | 39164.95966 | 173.2050808 |
| UIJ69213.1 | LacI_family_transcriptional_regulator_[Bacillus_cereus] | CPTF_Cu         | 25620.23333 | 44375.54584 | 173.2050808 |
| UIJ69213.1 | LacI_family_transcriptional_regulator_[Bacillus_cereus] | CPTF_Fe         | 40780.3     | 36901.61709 | 90.48883184 |
| UIJ69213.1 | LacI_family_transcriptional_regulator_[Bacillus_cereus] | CPTF_Mn         | 0           | 0           | 0           |
| UIJ69213.1 | LacI_family_transcriptional_regulator_[Bacillus_cereus] | CPTF_Ni         | 17381.73333 | 30106.04526 | 173.2050808 |
| UIJ69213.1 | LacI_family_transcriptional_regulator_[Bacillus_cereus] | CPTF_U          | 0           | 0           | 0           |
| UIJ69213.1 | LacI_family_transcriptional_regulator_[Bacillus_cereus] | CPTF_metals_mix | 0           | 0           | 0           |
| UIJ69213.1 | LacI_family_transcriptional_regulator_[Bacillus_cereus] | CPTF_zcontrol   | 0           | 0           | 0           |
| UIJ69218.1 | DinB_family_protein_[Bacillus_cereus]                   | CPTF_Al         | 28885.26667 | 25019.87646 | 86.61812524 |
| UIJ69218.1 | DinB_family_protein_[Bacillus_cereus]                   | CPTF_Cd         | 48355.56667 | 12492.75359 | 25.8351922  |
| UIJ69218.1 | DinB_family_protein_[Bacillus_cereus]                   | CPTF_Co         | 47332.9     | 12298.38116 | 25.98273328 |
| UIJ69218.1 | DinB_family_protein_[Bacillus_cereus]                   | CPTF_Cu         | 60732.43333 | 20174.9669  | 33.2194279  |
| UIJ69218.1 | DinB_family_protein_[Bacillus_cereus]                   | CPTF_Fe         | 52068.03333 | 7095.353098 | 13.62708104 |
| UIJ69218.1 | DinB_family_protein_[Bacillus_cereus]                   | CPTF_Mn         | 56763.06667 | 49972.38609 | 88.03679757 |
| UIJ69218.1 | DinB_family_protein_[Bacillus_cereus]                   | CPTF_Ni         | 13341.73333 | 23108.55999 | 173.2050808 |
| UIJ69218.1 | DinB_family_protein_[Bacillus_cereus]                   | CPTF_U          | 12109.23333 | 20973.80737 | 173.2050808 |
| UIJ69218.1 | DinB_family_protein_[Bacillus_cereus]                   | CPTF_metals_mix | 7615.133333 | 13189.79784 | 173.2050808 |
| UIJ69218.1 | DinB_family_protein_[Bacillus_cereus]                   | CPTF_zcontrol   | 33258.36667 | 29057.06343 | 87.3676802  |
| UIJ69225.1 | VOC_family_protein_[Bacillus_cereus]                    | CPTF_Al         | 59282.66667 | 11507.26402 | 19.41084075 |
| UIJ69225.1 | VOC_family_protein_[Bacillus_cereus]                    | CPTF_Cd         | 101471.4    | 32041.60729 | 31.57698355 |
| UIJ69225.1 | VOC_family_protein_[Bacillus_cereus]                    | CPTF_Co         | 72969.53333 | 32417.40652 | 44.42594743 |
| UIJ69225.1 | VOC_family_protein_[Bacillus_cereus]                    | CPTF_Cu         | 98035.33333 | 36706.23016 | 37.44183746 |
| UIJ69225.1 | VOC_family_protein_[Bacillus_cereus]                    | CPTF_Fe         | 75612.7     | 27094.86323 | 35.83374648 |
| UIJ69225.1 | VOC_family_protein_[Bacillus_cereus]                    | CPTF_Mn         | 57345.46667 | 32876.44293 | 57.33050029 |
| UIJ69225.1 | VOC_family_protein_[Bacillus_cereus]                    | CPTF_Ni         | 101665.3667 | 18725.91109 | 18.41916446 |
| UIJ69225.1 | VOC_family_protein_[Bacillus_cereus]                    | CPTF_U          | 46207.1     | 18078.79149 | 39.1255705  |
| UIJ69225.1 | VOC_family_protein_[Bacillus_cereus]                    | CPTF_metals_mix | 863227.2333 | 149655.2344 | 17.33671375 |
| UIJ69225.1 | VOC_family_protein_[Bacillus_cereus]                    | CPTF_zcontrol   | 35082       | 3211.214649 | 9.153453762 |
| UIJ69245.1 | TerD_family_protein_[Bacillus_cereus]                   | CPTF_Al         | 175987.9    | 69501.50705 | 39.49220773 |
| UIJ69245.1 | TerD_family_protein_[Bacillus_cereus]                   | CPTF_Cd         | 159160.2333 | 85813.06065 | 53.91614404 |
| UIJ69245.1 | TerD_family_protein_[Bacillus_cereus]                   | CPTF_Co         | 172104.8    | 53722.64791 | 31.2150782  |
| UIJ69245.1 | TerD_family_protein_[Bacillus_cereus]                   | CPTF_Cu         | 115672.0333 | 61685.14168 | 53.32761939 |
| UIJ69245.1 | TerD_family_protein_[Bacillus_cereus]                   | CPTF_Fe         | 196381.0333 | 82610.5878  | 42.06647984 |
| UIJ69245.1 | TerD_family_protein_[Bacillus_cereus]                   | CPTF_Mn         | 118008.0667 | 46501.19465 | 39.40509828 |
| UIJ69245.1 | TerD_family_protein_[Bacillus_cereus]                   | CPTF_Ni         | 184783.0333 | 102463.516  | 55.45071652 |
| UIJ69245.1 | TerD_family_protein_[Bacillus_cereus]                   | CPTF_U          | 224759.5    | 84618.28989 | 37.64837077 |
| UIJ69245.1 | TerD_family_protein_[Bacillus_cereus]                   | CPTF_metals_mix | 34333.83333 | 34287.34493 | 99.86459887 |
| UIJ69245.1 | TerD_family_protein_[Bacillus_cereus]                   | CPTF_zcontrol   | 188176.9    | 164770.0809 | 87.56126862 |
| UIJ69251.1 | D-cysteine_desulphhydrase_[Bacillus_cereus]             | CPTF_Al         | 43965.8     | 39939.64468 | 90.84252916 |
| UIJ69251.1 | D-cysteine_desulphhydrase_[Bacillus_cereus]             | CPTF_Cd         | 128222      | 30648.1396  | 23.90240333 |
| UIJ69251.1 | D-cysteine_desulphhydrase_[Bacillus_cereus]             | CPTF_Co         | 38238.8     | 33853.13137 | 88.53084137 |

|            |                                                       |                 |             |             |              |
|------------|-------------------------------------------------------|-----------------|-------------|-------------|--------------|
| UIJ69251.1 | D-cysteine_desulhydrase [Bacillus_cereus]             | CPTF_Cu         | 39775.33333 | 34450.98294 | 86.61393897  |
| UIJ69251.1 | D-cysteine_desulhydrase [Bacillus_cereus]             | CPTF_Fe         | 62839.8     | 23795.61494 | 37.86710801  |
| UIJ69251.1 | D-cysteine_desulhydrase [Bacillus_cereus]             | CPTF_Mn         | 54995.3     | 33183.17366 | 60.33819919  |
| UIJ69251.1 | D-cysteine_desulhydrase [Bacillus_cereus]             | CPTF_Ni         | 0           | 0           | 0            |
| UIJ69251.1 | D-cysteine_desulhydrase [Bacillus_cereus]             | CPTF_U          | 9777.766667 | 16935.58865 | 173.2050808  |
| UIJ69251.1 | D-cysteine_desulhydrase [Bacillus_cereus]             | CPTF_metals_mix | 152384      | 25115.20498 | 16.48152364  |
| UIJ69251.1 | D-cysteine_desulhydrase [Bacillus_cereus]             | CPTF_zcontrol   | 30033.43333 | 26544.18483 | 88.38211914  |
| UIJ69256.1 | ABC_transporter_ATP-binding_protein [Bacillus_cereus] | CPTF_Al         | 395442.2    | 343042.5698 | 86.74910513  |
| UIJ69256.1 | ABC_transporter_ATP-binding_protein [Bacillus_cereus] | CPTF_Cd         | 804208.0333 | 88546.08479 | 11.01034572  |
| UIJ69256.1 | ABC_transporter_ATP-binding_protein [Bacillus_cereus] | CPTF_Co         | 404064.9    | 364322.9009 | 90.16445152  |
| UIJ69256.1 | ABC_transporter_ATP-binding_protein [Bacillus_cereus] | CPTF_Cu         | 209209.7667 | 83265.46842 | 39.79999105  |
| UIJ69256.1 | ABC_transporter_ATP-binding_protein [Bacillus_cereus] | CPTF_Fe         | 566070.6667 | 211347.2258 | 37.33583778  |
| UIJ69256.1 | ABC_transporter_ATP-binding_protein [Bacillus_cereus] | CPTF_Mn         | 388209.2333 | 336431.0152 | 86.66229092  |
| UIJ69256.1 | ABC_transporter_ATP-binding_protein [Bacillus_cereus] | CPTF_Ni         | 46269.13333 | 40074.69491 | 86.6121581   |
| UIJ69256.1 | ABC_transporter_ATP-binding_protein [Bacillus_cereus] | CPTF_U          | 0           | 0           | 0            |
| UIJ69256.1 | ABC_transporter_ATP-binding_protein [Bacillus_cereus] | CPTF_metals_mix | 1186394.667 | 169918.3537 | 14.32224524  |
| UIJ69256.1 | ABC_transporter_ATP-binding_protein [Bacillus_cereus] | CPTF_zcontrol   | 374138.8667 | 292586.9735 | 78.20277431  |
| UIJ69257.1 | ABC_transporter_permease [Bacillus_cereus]            | CPTF_Al         | 930716.3667 | 72952.69254 | 7.838337774  |
| UIJ69257.1 | ABC_transporter_permease [Bacillus_cereus]            | CPTF_Cd         | 1117014.133 | 160593.5522 | 14.37703852  |
| UIJ69257.1 | ABC_transporter_permease [Bacillus_cereus]            | CPTF_Co         | 969405.9    | 224045.3081 | 23.1116097   |
| UIJ69257.1 | ABC_transporter_permease [Bacillus_cereus]            | CPTF_Cu         | 976782.7667 | 99813.05314 | 10.21855182  |
| UIJ69257.1 | ABC_transporter_permease [Bacillus_cereus]            | CPTF_Fe         | 995604.4667 | 150052.0155 | 15.07144861  |
| UIJ69257.1 | ABC_transporter_permease [Bacillus_cereus]            | CPTF_Mn         | 869461      | 131400.3835 | 15.11285537  |
| UIJ69257.1 | ABC_transporter_permease [Bacillus_cereus]            | CPTF_Ni         | 1029530.5   | 19431.85013 | 1.887447738  |
| UIJ69257.1 | ABC_transporter_permease [Bacillus_cereus]            | CPTF_U          | 1223884.033 | 75733.19125 | 6.187938496  |
| UIJ69257.1 | ABC_transporter_permease [Bacillus_cereus]            | CPTF_metals_mix | 1429570.2   | 47886.27405 | 3.349697276  |
| UIJ69257.1 | ABC_transporter_permease [Bacillus_cereus]            | CPTF_zcontrol   | 937974.3333 | 125978.0054 | 13.4308585   |
| UIJ69259.1 | DinB_family_protein [Bacillus_cereus]                 | CPTF_Al         | 129224      | 114970.8487 | 88.970198    |
| UIJ69259.1 | DinB_family_protein [Bacillus_cereus]                 | CPTF_Cd         | 222522.6667 | 20852.34745 | 9.370886915  |
| UIJ69259.1 | DinB_family_protein [Bacillus_cereus]                 | CPTF_Co         | 152193      | 139290.523  | 91.52229275  |
| UIJ69259.1 | DinB_family_protein [Bacillus_cereus]                 | CPTF_Cu         | 149560.3333 | 25240.53506 | 16.87649024  |
| UIJ69259.1 | DinB_family_protein [Bacillus_cereus]                 | CPTF_Fe         | 126494.3333 | 110060.2501 | 87.00804789  |
| UIJ69259.1 | DinB_family_protein [Bacillus_cereus]                 | CPTF_Mn         | 257431.3333 | 185956.0326 | 72.2351977   |
| UIJ69259.1 | DinB_family_protein [Bacillus_cereus]                 | CPTF_Ni         | 44936       | 77831.43509 | 173.2050808  |
| UIJ69259.1 | DinB_family_protein [Bacillus_cereus]                 | CPTF_U          | 106234.3333 | 101907.5559 | 95.9271383   |
| UIJ69259.1 | DinB_family_protein [Bacillus_cereus]                 | CPTF_metals_mix | 83118.66667 | 72207.49298 | 86.87277585  |
| UIJ69259.1 | DinB_family_protein [Bacillus_cereus]                 | CPTF_zcontrol   | 347879.6667 | 148374.6058 | 42.65112191  |
| UIJ69267.1 | LD-carboxypeptidase [Bacillus_cereus]                 | CPTF_Al         | 0           | 0           | 0            |
| UIJ69267.1 | LD-carboxypeptidase [Bacillus_cereus]                 | CPTF_Cd         | 0           | 0           | 0            |
| UIJ69267.1 | LD-carboxypeptidase [Bacillus_cereus]                 | CPTF_Co         | 5789.433333 | 10027.59268 | 173.2050808  |
| UIJ69267.1 | LD-carboxypeptidase [Bacillus_cereus]                 | CPTF_Cu         | 0           | 0           | 0            |
| UIJ69267.1 | LD-carboxypeptidase [Bacillus_cereus]                 | CPTF_Fe         | 0           | 0           | 0            |
| UIJ69267.1 | LD-carboxypeptidase [Bacillus_cereus]                 | CPTF_Mn         | 0           | 0           | 0            |
| UIJ69267.1 | LD-carboxypeptidase [Bacillus_cereus]                 | CPTF_Ni         | 0           | 0           | 0            |
| UIJ69267.1 | LD-carboxypeptidase [Bacillus_cereus]                 | CPTF_U          | 0           | 0           | 0            |
| UIJ69267.1 | LD-carboxypeptidase [Bacillus_cereus]                 | CPTF_metals_mix | 238821.5    | 51117.13969 | 21.40391032  |
| UIJ69267.1 | LD-carboxypeptidase [Bacillus_cereus]                 | CPTF_zcontrol   | 0           | 0           | 0            |
| UIJ69268.1 | DUF3224_domain-containing_protein [Bacillus_cereus]   | CPTF_Al         | 153726.6667 | 166072.9836 | 108.01313437 |
| UIJ69268.1 | DUF3224_domain-containing_protein [Bacillus_cereus]   | CPTF_Cd         | 180601.3333 | 18389.74204 | 10.18250624  |
| UIJ69268.1 | DUF3224_domain-containing_protein [Bacillus_cereus]   | CPTF_Co         | 0           | 0           | 0            |
| UIJ69268.1 | DUF3224_domain-containing_protein [Bacillus_cereus]   | CPTF_Cu         | 51247       | 88762.40774 | 173.2050808  |
| UIJ69268.1 | DUF3224_domain-containing_protein [Bacillus_cereus]   | CPTF_Fe         | 116021.3333 | 100804.0277 | 86.88404522  |
| UIJ69268.1 | DUF3224_domain-containing_protein [Bacillus_cereus]   | CPTF_Mn         | 82825.33333 | 74292.99685 | 89.69839766  |
| UIJ69268.1 | DUF3224_domain-containing_protein [Bacillus_cereus]   | CPTF_Ni         | 0           | 0           | 0            |
| UIJ69268.1 | DUF3224_domain-containing_protein [Bacillus_cereus]   | CPTF_U          | 0           | 0           | 0            |
| UIJ69268.1 | DUF3224_domain-containing_protein [Bacillus_cereus]   | CPTF_metals_mix | 157451.5333 | 153153.6089 | 97.27031912  |
| UIJ69268.1 | DUF3224_domain-containing_protein [Bacillus_cereus]   | CPTF_zcontrol   | 179193.6667 | 15704.96091 | 8.76423883   |
| UIJ69269.1 | DUF1015_family_protein [Bacillus_cereus]              | CPTF_Al         | 1050440.1   | 166434.8306 | 15.84429523  |
| UIJ69269.1 | DUF1015_family_protein [Bacillus_cereus]              | CPTF_Cd         | 1264126.333 | 241618.9634 | 19.11351398  |
| UIJ69269.1 | DUF1015_family_protein [Bacillus_cereus]              | CPTF_Co         | 1015598.067 | 128515.0836 | 12.65412842  |
| UIJ69269.1 | DUF1015_family_protein [Bacillus_cereus]              | CPTF_Cu         | 1071690.767 | 167102.955  | 15.59246008  |

|            |                                                                        |                 |             |             |             |
|------------|------------------------------------------------------------------------|-----------------|-------------|-------------|-------------|
| UIJ69269.1 | DUF1015_family_protein_[Bacillus_cereus]                               | CPTF_Fe         | 982390.3333 | 343047.1307 | 34.91963622 |
| UIJ69269.1 | DUF1015_family_protein_[Bacillus_cereus]                               | CPTF_Mn         | 1232798     | 114504.9345 | 9.28821547  |
| UIJ69269.1 | DUF1015_family_protein_[Bacillus_cereus]                               | CPTF_Ni         | 603852.3333 | 225311.2035 | 37.31230155 |
| UIJ69269.1 | DUF1015_family_protein_[Bacillus_cereus]                               | CPTF_U          | 648674.4    | 536930.5611 | 82.77350874 |
| UIJ69269.1 | DUF1015_family_protein_[Bacillus_cereus]                               | CPTF_metals_mix | 1565959.633 | 131192.3574 | 8.377761123 |
| UIJ69269.1 | DUF1015_family_protein_[Bacillus_cereus]                               | CPTF_zcontrol   | 1037749.533 | 454940.5974 | 43.8391522  |
| UIJ69270.1 | 3-phosphoglycerate_dehydrogenase_family_protein_[Bacillus_cereus]      | CPTF_Al         | 2667652.333 | 175982.7756 | 6.596915698 |
| UIJ69270.1 | 3-phosphoglycerate_dehydrogenase_family_protein_[Bacillus_cereus]      | CPTF_Cd         | 2695360.5   | 344302.3908 | 12.7738902  |
| UIJ69270.1 | 3-phosphoglycerate_dehydrogenase_family_protein_[Bacillus_cereus]      | CPTF_Co         | 2712273.667 | 298615.46   | 11.00978355 |
| UIJ69270.1 | 3-phosphoglycerate_dehydrogenase_family_protein_[Bacillus_cereus]      | CPTF_Cu         | 2864194.5   | 277412.6141 | 9.685536861 |
| UIJ69270.1 | 3-phosphoglycerate_dehydrogenase_family_protein_[Bacillus_cereus]      | CPTF_Fe         | 2515670     | 264973.1098 | 10.53290415 |
| UIJ69270.1 | 3-phosphoglycerate_dehydrogenase_family_protein_[Bacillus_cereus]      | CPTF_Mn         | 2433380.333 | 385580.5647 | 15.84547057 |
| UIJ69270.1 | 3-phosphoglycerate_dehydrogenase_family_protein_[Bacillus_cereus]      | CPTF_Ni         | 2572666.633 | 59696.29719 | 2.320405466 |
| UIJ69270.1 | 3-phosphoglycerate_dehydrogenase_family_protein_[Bacillus_cereus]      | CPTF_U          | 2611942.667 | 338776.458  | 12.97028692 |
| UIJ69270.1 | 3-phosphoglycerate_dehydrogenase_family_protein_[Bacillus_cereus]      | CPTF_metals_mix | 2545050.467 | 485883.0229 | 19.09129227 |
| UIJ69270.1 | 3-phosphoglycerate_dehydrogenase_family_protein_[Bacillus_cereus]      | CPTF_zcontrol   | 2503799.333 | 155667.4971 | 6.217251318 |
| UIJ69271.1 | 3-phosphoserine/phosphohydroxythreonine_transaminase_[Bacillus_cereus] | CPTF_Al         | 2356241.667 | 165824.8145 | 7.0376828   |
| UIJ69271.1 | 3-phosphoserine/phosphohydroxythreonine_transaminase_[Bacillus_cereus] | CPTF_Cd         | 2246336.667 | 411615.3112 | 18.32384777 |
| UIJ69271.1 | 3-phosphoserine/phosphohydroxythreonine_transaminase_[Bacillus_cereus] | CPTF_Co         | 1512136.667 | 448033.993  | 29.62919972 |
| UIJ69271.1 | 3-phosphoserine/phosphohydroxythreonine_transaminase_[Bacillus_cereus] | CPTF_Cu         | 1906559     | 698991.4275 | 36.66245983 |
| UIJ69271.1 | 3-phosphoserine/phosphohydroxythreonine_transaminase_[Bacillus_cereus] | CPTF_Fe         | 2613385     | 610256.6822 | 23.3511971  |
| UIJ69271.1 | 3-phosphoserine/phosphohydroxythreonine_transaminase_[Bacillus_cereus] | CPTF_Mn         | 1498893.333 | 624367.1257 | 41.65520734 |
| UIJ69271.1 | 3-phosphoserine/phosphohydroxythreonine_transaminase_[Bacillus_cereus] | CPTF_Ni         | 2088305.333 | 608354.4237 | 29.13148829 |
| UIJ69271.1 | 3-phosphoserine/phosphohydroxythreonine_transaminase_[Bacillus_cereus] | CPTF_U          | 1638395.667 | 342519.195  | 20.90576788 |
| UIJ69271.1 | 3-phosphoserine/phosphohydroxythreonine_transaminase_[Bacillus_cereus] | CPTF_metals_mix | 1612664.567 | 246031.7713 | 15.25622727 |
| UIJ69271.1 | 3-phosphoserine/phosphohydroxythreonine_transaminase_[Bacillus_cereus] | CPTF_zcontrol   | 1581890.667 | 571342.7832 | 36.1177163  |
| UIJ69321.1 | peroxide-responsive_transcriptional_repressor_PerR_[Bacillus_cereus]   | CPTF_Al         | 318257.4333 | 59654.51548 | 18.74410752 |
| UIJ69321.1 | peroxide-responsive_transcriptional_repressor_PerR_[Bacillus_cereus]   | CPTF_Cd         | 279010.6333 | 166906.6608 | 59.82089598 |
| UIJ69321.1 | peroxide-responsive_transcriptional_repressor_PerR_[Bacillus_cereus]   | CPTF_Co         | 365026.6333 | 87135.66536 | 23.87104321 |
| UIJ69321.1 | peroxide-responsive_transcriptional_repressor_PerR_[Bacillus_cereus]   | CPTF_Cu         | 413008.8    | 56124.04856 | 13.58906846 |
| UIJ69321.1 | peroxide-responsive_transcriptional_repressor_PerR_[Bacillus_cereus]   | CPTF_Fe         | 204212.6    | 149348.6601 | 73.13391049 |
| UIJ69321.1 | peroxide-responsive_transcriptional_repressor_PerR_[Bacillus_cereus]   | CPTF_Mn         | 170170.9333 | 127215.4228 | 74.75743377 |
| UIJ69321.1 | peroxide-responsive_transcriptional_repressor_PerR_[Bacillus_cereus]   | CPTF_Ni         | 327613.0667 | 78351.35826 | 23.91582212 |
| UIJ69321.1 | peroxide-responsive_transcriptional_repressor_PerR_[Bacillus_cereus]   | CPTF_U          | 263476.6667 | 24229.91872 | 9.196229416 |
| UIJ69321.1 | peroxide-responsive_transcriptional_repressor_PerR_[Bacillus_cereus]   | CPTF_metals_mix | 272164.8333 | 89971.13536 | 33.05759023 |
| UIJ69321.1 | peroxide-responsive_transcriptional_repressor_PerR_[Bacillus_cereus]   | CPTF_zcontrol   | 261843.6667 | 53052.65136 | 20.26119327 |
| UIJ69323.1 | hypothetical_protein_LW858_01035_[Bacillus_cereus]                     | CPTF_Al         | 136035.3333 | 118265.661  | 86.93745818 |
| UIJ69323.1 | hypothetical_protein_LW858_01035_[Bacillus_cereus]                     | CPTF_Cd         | 67427.33333 | 116787.5672 | 173.2050808 |
| UIJ69323.1 | hypothetical_protein_LW858_01035_[Bacillus_cereus]                     | CPTF_Co         | 0           | 0           | 0           |
| UIJ69323.1 | hypothetical_protein_LW858_01035_[Bacillus_cereus]                     | CPTF_Cu         | 0           | 0           | 0           |
| UIJ69323.1 | hypothetical_protein_LW858_01035_[Bacillus_cereus]                     | CPTF_Fe         | 53364.33333 | 92429.73665 | 173.2050808 |
| UIJ69323.1 | hypothetical_protein_LW858_01035_[Bacillus_cereus]                     | CPTF_Mn         | 0           | 0           | 0           |
| UIJ69323.1 | hypothetical_protein_LW858_01035_[Bacillus_cereus]                     | CPTF_Ni         | 0           | 0           | 0           |
| UIJ69323.1 | hypothetical_protein_LW858_01035_[Bacillus_cereus]                     | CPTF_U          | 0           | 0           | 0           |
| UIJ69323.1 | hypothetical_protein_LW858_01035_[Bacillus_cereus]                     | CPTF_metals_mix | 14775.16667 | 25591.33936 | 173.2050808 |
| UIJ69323.1 | hypothetical_protein_LW858_01035_[Bacillus_cereus]                     | CPTF_zcontrol   | 42843       | 74206.25275 | 173.2050808 |
| UIJ69328.1 | potassium-transporting_ATPase_subunit_KdpB_[Bacillus_cereus]           | CPTF_Al         | 1452409.333 | 226375.8037 | 15.58622618 |
| UIJ69328.1 | potassium-transporting_ATPase_subunit_KdpB_[Bacillus_cereus]           | CPTF_Cd         | 1333117.667 | 421840.0848 | 31.64312464 |
| UIJ69328.1 | potassium-transporting_ATPase_subunit_KdpB_[Bacillus_cereus]           | CPTF_Co         | 2499341.767 | 750310.2987 | 30.0203161  |
| UIJ69328.1 | potassium-transporting_ATPase_subunit_KdpB_[Bacillus_cereus]           | CPTF_Cu         | 1465988.433 | 53712.22658 | 3.663891567 |
| UIJ69328.1 | potassium-transporting_ATPase_subunit_KdpB_[Bacillus_cereus]           | CPTF_Fe         | 1333691.333 | 152228.3906 | 11.41406462 |
| UIJ69328.1 | potassium-transporting_ATPase_subunit_KdpB_[Bacillus_cereus]           | CPTF_Mn         | 1200997.533 | 67590.41504 | 5.627856275 |
| UIJ69328.1 | potassium-transporting_ATPase_subunit_KdpB_[Bacillus_cereus]           | CPTF_Ni         | 1439449.7   | 159062.1055 | 11.05020242 |
| UIJ69328.1 | potassium-transporting_ATPase_subunit_KdpB_[Bacillus_cereus]           | CPTF_U          | 1521818.3   | 278675.4922 | 18.31200822 |
| UIJ69328.1 | potassium-transporting_ATPase_subunit_KdpB_[Bacillus_cereus]           | CPTF_metals_mix | 1952701.733 | 124257.8457 | 6.363380722 |
| UIJ69328.1 | potassium-transporting_ATPase_subunit_KdpB_[Bacillus_cereus]           | CPTF_zcontrol   | 1179485.2   | 102500.0355 | 8.690234988 |
| UIJ69348.1 | nitronate_monooxygenase_[Bacillus_cereus]                              | CPTF_Al         | 197017.4667 | 15913.58391 | 8.07724522  |
| UIJ69348.1 | nitronate_monooxygenase_[Bacillus_cereus]                              | CPTF_Cd         | 199867.3667 | 100357.778  | 50.21218803 |
| UIJ69348.1 | nitronate_monooxygenase_[Bacillus_cereus]                              | CPTF_Co         | 176684.8333 | 28648.56908 | 16.21450384 |
| UIJ69348.1 | nitronate_monooxygenase_[Bacillus_cereus]                              | CPTF_Cu         | 124813.5333 | 53062.58401 | 42.51348599 |
| UIJ69348.1 | nitronate_monooxygenase_[Bacillus_cereus]                              | CPTF_Fe         | 130248.7667 | 108408.2009 | 83.2316525  |

|            |                                                               |                 |             |             |             |
|------------|---------------------------------------------------------------|-----------------|-------------|-------------|-------------|
| UIJ69348.1 | nitronate_monooxygenase_[Bacillus_cereus]                     | CPTF_Mn         | 86304.7     | 26040.09089 | 30.17227439 |
| UIJ69348.1 | nitronate_monooxygenase_[Bacillus_cereus]                     | CPTF_Ni         | 119698.5667 | 37339.32787 | 31.19446532 |
| UIJ69348.1 | nitronate_monooxygenase_[Bacillus_cereus]                     | CPTF_U          | 12930.36667 | 22396.05203 | 173.2050808 |
| UIJ69348.1 | nitronate_monooxygenase_[Bacillus_cereus]                     | CPTF_metals_mix | 380195.9333 | 142231.9749 | 37.41017786 |
| UIJ69348.1 | nitronate_monooxygenase_[Bacillus_cereus]                     | CPTF_zcontrol   | 18904.1     | 32742.86167 | 173.2050808 |
| UIJ69349.1 | 3-isopropylmalate_dehydratase_small_subunit_[Bacillus_cereus] | CPTF_Al         | 27838.6     | 48217.86961 | 173.2050808 |
| UIJ69349.1 | 3-isopropylmalate_dehydratase_small_subunit_[Bacillus_cereus] | CPTF_Cd         | 60852.8     | 12320.44096 | 20.24630084 |
| UIJ69349.1 | 3-isopropylmalate_dehydratase_small_subunit_[Bacillus_cereus] | CPTF_Co         | 85863       | 78531.72524 | 91.46166013 |
| UIJ69349.1 | 3-isopropylmalate_dehydratase_small_subunit_[Bacillus_cereus] | CPTF_Cu         | 61006.03333 | 55420.15969 | 90.84373571 |
| UIJ69349.1 | 3-isopropylmalate_dehydratase_small_subunit_[Bacillus_cereus] | CPTF_Fe         | 18030.1     | 31229.04927 | 173.2050808 |
| UIJ69349.1 | 3-isopropylmalate_dehydratase_small_subunit_[Bacillus_cereus] | CPTF_Mn         | 94527.6     | 117713.0321 | 124.5276852 |
| UIJ69349.1 | 3-isopropylmalate_dehydratase_small_subunit_[Bacillus_cereus] | CPTF_Ni         | 29040.86667 | 50300.25656 | 173.2050808 |
| UIJ69349.1 | 3-isopropylmalate_dehydratase_small_subunit_[Bacillus_cereus] | CPTF_U          | 0           | 0           | 0           |
| UIJ69349.1 | 3-isopropylmalate_dehydratase_small_subunit_[Bacillus_cereus] | CPTF_metals_mix | 193628.5    | 30761.32914 | 15.88677759 |
| UIJ69349.1 | 3-isopropylmalate_dehydratase_small_subunit_[Bacillus_cereus] | CPTF_zcontrol   | 8797.566667 | 15237.83245 | 173.2050808 |
| UIJ69357.1 | aspartate_aminotransferase_family_protein_[Bacillus_cereus]   | CPTF_Al         | 4640209.967 | 166125.9861 | 3.580139419 |
| UIJ69357.1 | aspartate_aminotransferase_family_protein_[Bacillus_cereus]   | CPTF_Cd         | 5098643.467 | 165476.0798 | 3.245492275 |
| UIJ69357.1 | aspartate_aminotransferase_family_protein_[Bacillus_cereus]   | CPTF_Co         | 3597879.467 | 651572.2746 | 18.10989725 |
| UIJ69357.1 | aspartate_aminotransferase_family_protein_[Bacillus_cereus]   | CPTF_Cu         | 3282375.1   | 256486.1422 | 7.814041185 |
| UIJ69357.1 | aspartate_aminotransferase_family_protein_[Bacillus_cereus]   | CPTF_Fe         | 4572271.633 | 552293.3352 | 12.07918907 |
| UIJ69357.1 | aspartate_aminotransferase_family_protein_[Bacillus_cereus]   | CPTF_Mn         | 3817305.4   | 849974.1777 | 22.26633944 |
| UIJ69357.1 | aspartate_aminotransferase_family_protein_[Bacillus_cereus]   | CPTF_Ni         | 3683171.9   | 522249.9953 | 14.17935436 |
| UIJ69357.1 | aspartate_aminotransferase_family_protein_[Bacillus_cereus]   | CPTF_U          | 4242822.133 | 862028.525  | 20.31733827 |
| UIJ69357.1 | aspartate_aminotransferase_family_protein_[Bacillus_cereus]   | CPTF_metals_mix | 2252188.767 | 185940.51   | 8.255991361 |
| UIJ69357.1 | aspartate_aminotransferase_family_protein_[Bacillus_cereus]   | CPTF_zcontrol   | 4102640.967 | 295176.3839 | 7.19478956  |
| UIJ69363.1 | acetolactate_synthase_large_subunit_[Bacillus_cereus]         | CPTF_Cd         | 783333.3333 | 683690.9633 | 87.27969745 |
| UIJ69363.1 | acetolactate_synthase_large_subunit_[Bacillus_cereus]         | CPTF_Cd         | 1150000     | 104403.0651 | 9.078527399 |
| UIJ69363.1 | acetolactate_synthase_large_subunit_[Bacillus_cereus]         | CPTF_Co         | 413333.3333 | 715914.3338 | 173.2050808 |
| UIJ69363.1 | acetolactate_synthase_large_subunit_[Bacillus_cereus]         | CPTF_Cu         | 1186666.667 | 150443.788  | 12.6778473  |
| UIJ69363.1 | acetolactate_synthase_large_subunit_[Bacillus_cereus]         | CPTF_Fe         | 1340000     | 80000       | 5.970149254 |
| UIJ69363.1 | acetolactate_synthase_large_subunit_[Bacillus_cereus]         | CPTF_Mn         | 1039559     | 180661.9037 | 17.37870613 |
| UIJ69363.1 | acetolactate_synthase_large_subunit_[Bacillus_cereus]         | CPTF_Ni         | 1350000     | 180831.4132 | 13.3949195  |
| UIJ69363.1 | acetolactate_synthase_large_subunit_[Bacillus_cereus]         | CPTF_U          | 370000      | 640858.7988 | 173.2050808 |
| UIJ69363.1 | acetolactate_synthase_large_subunit_[Bacillus_cereus]         | CPTF_metals_mix | 566079      | 9564.627384 | 1.689627664 |
| UIJ69363.1 | acetolactate_synthase_large_subunit_[Bacillus_cereus]         | CPTF_zcontrol   | 1230000     | 115325.6259 | 9.37606715  |
| UIJ69368.1 | GNAT_family_N-acetyltransferase_[Bacillus_cereus]             | CPTF_Al         | 0           | 0           | 0           |
| UIJ69368.1 | GNAT_family_N-acetyltransferase_[Bacillus_cereus]             | CPTF_Cd         | 0           | 0           | 0           |
| UIJ69368.1 | GNAT_family_N-acetyltransferase_[Bacillus_cereus]             | CPTF_Co         | 0           | 0           | 0           |
| UIJ69368.1 | GNAT_family_N-acetyltransferase_[Bacillus_cereus]             | CPTF_Cu         | 10908.13333 | 18893.44115 | 173.2050808 |
| UIJ69368.1 | GNAT_family_N-acetyltransferase_[Bacillus_cereus]             | CPTF_Fe         | 0           | 0           | 0           |
| UIJ69368.1 | GNAT_family_N-acetyltransferase_[Bacillus_cereus]             | CPTF_Mn         | 0           | 0           | 0           |
| UIJ69368.1 | GNAT_family_N-acetyltransferase_[Bacillus_cereus]             | CPTF_Ni         | 15284.1     | 26472.83775 | 173.2050808 |
| UIJ69368.1 | GNAT_family_N-acetyltransferase_[Bacillus_cereus]             | CPTF_U          | 0           | 0           | 0           |
| UIJ69368.1 | GNAT_family_N-acetyltransferase_[Bacillus_cereus]             | CPTF_metals_mix | 30527.63333 | 18647.1097  | 61.08272296 |
| UIJ69368.1 | GNAT_family_N-acetyltransferase_[Bacillus_cereus]             | CPTF_zcontrol   | 0           | 0           | 0           |
| UIJ69381.1 | sensor_histidine_kinase_[Bacillus_cereus]                     | CPTF_Al         | 13616.96667 | 23585.27811 | 173.2050808 |
| UIJ69381.1 | sensor_histidine_kinase_[Bacillus_cereus]                     | CPTF_Cd         | 88703.5     | 41179.93452 | 46.42424991 |
| UIJ69381.1 | sensor_histidine_kinase_[Bacillus_cereus]                     | CPTF_Co         | 63204.43333 | 58032.36229 | 91.81691732 |
| UIJ69381.1 | sensor_histidine_kinase_[Bacillus_cereus]                     | CPTF_Cu         | 94220.2     | 128976.1919 | 136.8880472 |
| UIJ69381.1 | sensor_histidine_kinase_[Bacillus_cereus]                     | CPTF_Fe         | 43547.66667 | 17249.16539 | 39.60984986 |
| UIJ69381.1 | sensor_histidine_kinase_[Bacillus_cereus]                     | CPTF_Mn         | 57839.9     | 69436.9741  | 120.0503011 |
| UIJ69381.1 | sensor_histidine_kinase_[Bacillus_cereus]                     | CPTF_Ni         | 0           | 0           | 0           |
| UIJ69381.1 | sensor_histidine_kinase_[Bacillus_cereus]                     | CPTF_U          | 0           | 0           | 0           |
| UIJ69381.1 | sensor_histidine_kinase_[Bacillus_cereus]                     | CPTF_metals_mix | 150709.3667 | 100310.4724 | 66.55888391 |
| UIJ69381.1 | sensor_histidine_kinase_[Bacillus_cereus]                     | CPTF_zcontrol   | 45209.03333 | 51620.148   | 114.1810479 |
| UIJ69388.1 | HAD-IA_family_hydrolase_[Bacillus_cereus]                     | CPTF_Al         | 0           | 0           | 0           |
| UIJ69388.1 | HAD-IA_family_hydrolase_[Bacillus_cereus]                     | CPTF_Cd         | 34014.2     | 29709.20864 | 87.34354664 |
| UIJ69388.1 | HAD-IA_family_hydrolase_[Bacillus_cereus]                     | CPTF_Co         | 5099.033333 | 8831.784803 | 173.2050808 |
| UIJ69388.1 | HAD-IA_family_hydrolase_[Bacillus_cereus]                     | CPTF_Cu         | 4297.533333 | 7443.546081 | 173.2050808 |
| UIJ69388.1 | HAD-IA_family_hydrolase_[Bacillus_cereus]                     | CPTF_Fe         | 0           | 0           | 0           |
| UIJ69388.1 | HAD-IA_family_hydrolase_[Bacillus_cereus]                     | CPTF_Mn         | 0           | 0           | 0           |

|            |                                                         |                 |             |             |             |
|------------|---------------------------------------------------------|-----------------|-------------|-------------|-------------|
| UIJ69388.1 | HAD-IA_family_hydrolase_[Bacillus_cereus]               | CPTF_Ni         | 0           | 0           | 0           |
| UIJ69388.1 | HAD-IA_family_hydrolase_[Bacillus_cereus]               | CPTF_U          | 0           | 0           | 0           |
| UIJ69388.1 | HAD-IA_family_hydrolase_[Bacillus_cereus]               | CPTF_metals_mix | 41875.76667 | 36697.00662 | 87.63303825 |
| UIJ69388.1 | HAD-IA_family_hydrolase_[Bacillus_cereus]               | CPTF_zcontrol   | 0           | 0           | 0           |
| UIJ69391.1 | AAC(3)_family_N-acetyltransferase_[Bacillus_cereus]     | CPTF_Al         | 550516.2333 | 30466.50305 | 5.534169785 |
| UIJ69391.1 | AAC(3)_family_N-acetyltransferase_[Bacillus_cereus]     | CPTF_Cd         | 532968      | 11803.82027 | 2.214733393 |
| UIJ69391.1 | AAC(3)_family_N-acetyltransferase_[Bacillus_cereus]     | CPTF_Co         | 774997.7    | 389481.4294 | 50.25581745 |
| UIJ69391.1 | AAC(3)_family_N-acetyltransferase_[Bacillus_cereus]     | CPTF_Cu         | 497375.4333 | 53544.18776 | 10.76534629 |
| UIJ69391.1 | AAC(3)_family_N-acetyltransferase_[Bacillus_cereus]     | CPTF_Fe         | 551475.3333 | 13059.76173 | 2.36814975  |
| UIJ69391.1 | AAC(3)_family_N-acetyltransferase_[Bacillus_cereus]     | CPTF_Mn         | 983301.7333 | 567708.8158 | 57.73495526 |
| UIJ69391.1 | AAC(3)_family_N-acetyltransferase_[Bacillus_cereus]     | CPTF_Ni         | 817719.8333 | 416523.7654 | 50.93722183 |
| UIJ69391.1 | AAC(3)_family_N-acetyltransferase_[Bacillus_cereus]     | CPTF_U          | 1070148     | 667475.2864 | 62.3722407  |
| UIJ69391.1 | AAC(3)_family_N-acetyltransferase_[Bacillus_cereus]     | CPTF_metals_mix | 486154.3333 | 9943.938874 | 2.045428415 |
| UIJ69391.1 | AAC(3)_family_N-acetyltransferase_[Bacillus_cereus]     | CPTF_zcontrol   | 576932.8333 | 90946.25866 | 15.76375159 |
| UIJ69412.1 | Gyrl-like_domain-containing_protein_[Bacillus_cereus]   | CPTF_Al         | 0           | 0           | 0           |
| UIJ69412.1 | Gyrl-like_domain-containing_protein_[Bacillus_cereus]   | CPTF_Cd         | 6581.4      | 11399.31918 | 173.2050808 |
| UIJ69412.1 | Gyrl-like_domain-containing_protein_[Bacillus_cereus]   | CPTF_Co         | 0           | 0           | 0           |
| UIJ69412.1 | Gyrl-like_domain-containing_protein_[Bacillus_cereus]   | CPTF_Cu         | 13614.56667 | 23581.12119 | 173.2050808 |
| UIJ69412.1 | Gyrl-like_domain-containing_protein_[Bacillus_cereus]   | CPTF_Fe         | 18565.13333 | 16235.53609 | 87.45176132 |
| UIJ69412.1 | Gyrl-like_domain-containing_protein_[Bacillus_cereus]   | CPTF_Mn         | 0           | 0           | 0           |
| UIJ69412.1 | Gyrl-like_domain-containing_protein_[Bacillus_cereus]   | CPTF_Ni         | 0           | 0           | 0           |
| UIJ69412.1 | Gyrl-like_domain-containing_protein_[Bacillus_cereus]   | CPTF_U          | 0           | 0           | 0           |
| UIJ69412.1 | Gyrl-like_domain-containing_protein_[Bacillus_cereus]   | CPTF_metals_mix | 7690.06667  | 6688.18416  | 86.97173185 |
| UIJ69412.1 | Gyrl-like_domain-containing_protein_[Bacillus_cereus]   | CPTF_zcontrol   | 0           | 0           | 0           |
| UIJ69423.1 | acyl_carrier_protein_[Bacillus_cereus]                  | CPTF_Al         | 0           | 0           | 0           |
| UIJ69423.1 | acyl_carrier_protein_[Bacillus_cereus]                  | CPTF_Cd         | 0           | 0           | 0           |
| UIJ69423.1 | acyl_carrier_protein_[Bacillus_cereus]                  | CPTF_Co         | 0           | 0           | 0           |
| UIJ69423.1 | acyl_carrier_protein_[Bacillus_cereus]                  | CPTF_Cu         | 0           | 0           | 0           |
| UIJ69423.1 | acyl_carrier_protein_[Bacillus_cereus]                  | CPTF_Fe         | 0           | 0           | 0           |
| UIJ69423.1 | acyl_carrier_protein_[Bacillus_cereus]                  | CPTF_Mn         | 0           | 0           | 0           |
| UIJ69423.1 | acyl_carrier_protein_[Bacillus_cereus]                  | CPTF_Ni         | 0           | 0           | 0           |
| UIJ69423.1 | acyl_carrier_protein_[Bacillus_cereus]                  | CPTF_U          | 0           | 0           | 0           |
| UIJ69423.1 | acyl_carrier_protein_[Bacillus_cereus]                  | CPTF_metals_mix | 1309261.333 | 651036.2096 | 49.72545916 |
| UIJ69423.1 | acyl_carrier_protein_[Bacillus_cereus]                  | CPTF_zcontrol   | 0           | 0           | 0           |
| UIJ69429.1 | cytochrome_c_oxidase_subunit_I_[Bacillus_cereus]        | CPTF_Al         | 258441      | 90764.17751 | 35.11988327 |
| UIJ69429.1 | cytochrome_c_oxidase_subunit_I_[Bacillus_cereus]        | CPTF_Cd         | 387550.6667 | 50309.16607 | 12.98131326 |
| UIJ69429.1 | cytochrome_c_oxidase_subunit_I_[Bacillus_cereus]        | CPTF_Co         | 198521.6667 | 56676.3752  | 28.54921387 |
| UIJ69429.1 | cytochrome_c_oxidase_subunit_I_[Bacillus_cereus]        | CPTF_Cu         | 127071.3333 | 17157.81155 | 13.50250375 |
| UIJ69429.1 | cytochrome_c_oxidase_subunit_I_[Bacillus_cereus]        | CPTF_Fe         | 300180.3333 | 82878.7513  | 27.60965396 |
| UIJ69429.1 | cytochrome_c_oxidase_subunit_I_[Bacillus_cereus]        | CPTF_Mn         | 251982.1667 | 177872.7093 | 70.58940386 |
| UIJ69429.1 | cytochrome_c_oxidase_subunit_I_[Bacillus_cereus]        | CPTF_Ni         | 0           | 0           | 0           |
| UIJ69429.1 | cytochrome_c_oxidase_subunit_I_[Bacillus_cereus]        | CPTF_U          | 133707.3333 | 119323.6737 | 89.24243026 |
| UIJ69429.1 | cytochrome_c_oxidase_subunit_I_[Bacillus_cereus]        | CPTF_metals_mix | 191041.3333 | 16242.90923 | 8.50230102  |
| UIJ69429.1 | cytochrome_c_oxidase_subunit_I_[Bacillus_cereus]        | CPTF_zcontrol   | 177834.8    | 98014.62893 | 55.11555046 |
| UIJ69433.1 | carbon-nitrogen_family_hydrolase_[Bacillus_cereus]      | CPTF_Al         | 0           | 0           | 0           |
| UIJ69433.1 | carbon-nitrogen_family_hydrolase_[Bacillus_cereus]      | CPTF_Cd         | 29371.56667 | 50873.04576 | 173.2050808 |
| UIJ69433.1 | carbon-nitrogen_family_hydrolase_[Bacillus_cereus]      | CPTF_Co         | 0           | 0           | 0           |
| UIJ69433.1 | carbon-nitrogen_family_hydrolase_[Bacillus_cereus]      | CPTF_Cu         | 47593.1     | 41381.48878 | 86.94850467 |
| UIJ69433.1 | carbon-nitrogen_family_hydrolase_[Bacillus_cereus]      | CPTF_Fe         | 0           | 0           | 0           |
| UIJ69433.1 | carbon-nitrogen_family_hydrolase_[Bacillus_cereus]      | CPTF_Mn         | 24096.23333 | 41735.9004  | 173.2050808 |
| UIJ69433.1 | carbon-nitrogen_family_hydrolase_[Bacillus_cereus]      | CPTF_Ni         | 0           | 0           | 0           |
| UIJ69433.1 | carbon-nitrogen_family_hydrolase_[Bacillus_cereus]      | CPTF_U          | 0           | 0           | 0           |
| UIJ69433.1 | carbon-nitrogen_family_hydrolase_[Bacillus_cereus]      | CPTF_metals_mix | 0           | 0           | 0           |
| UIJ69433.1 | carbon-nitrogen_family_hydrolase_[Bacillus_cereus]      | CPTF_zcontrol   | 102455.7    | 88737.01265 | 86.61012775 |
| UIJ69434.1 | GntR_family_transcriptional_regulator_[Bacillus_cereus] | CPTF_Al         | 96668.86667 | 150120.385  | 155.2934157 |
| UIJ69434.1 | GntR_family_transcriptional_regulator_[Bacillus_cereus] | CPTF_Cd         | 370179.8    | 12495.68769 | 3.375572543 |
| UIJ69434.1 | GntR_family_transcriptional_regulator_[Bacillus_cereus] | CPTF_Co         | 92092.36667 | 79698.46783 | 86.54188259 |
| UIJ69434.1 | GntR_family_transcriptional_regulator_[Bacillus_cereus] | CPTF_Cu         | 384180.7    | 43378.8776  | 11.29126934 |
| UIJ69434.1 | GntR_family_transcriptional_regulator_[Bacillus_cereus] | CPTF_Fe         | 318112.9    | 41080.40007 | 12.91378001 |
| UIJ69434.1 | GntR_family_transcriptional_regulator_[Bacillus_cereus] | CPTF_Mn         | 182729.4    | 176598.0593 | 96.64457896 |
| UIJ69434.1 | GntR_family_transcriptional_regulator_[Bacillus_cereus] | CPTF_Ni         | 38701.93333 | 28662.47524 | 74.05954372 |

|            |                                                                                              |                 |             |             |             |
|------------|----------------------------------------------------------------------------------------------|-----------------|-------------|-------------|-------------|
| UIJ69434.1 | GntR_family_transcriptional_regulator_[Bacillus_cereus]                                      | CPTF_U          | 0           | 0           | 0           |
| UIJ69434.1 | GntR_family_transcriptional_regulator_[Bacillus_cereus]                                      | CPTF_metals_mix | 346376.5667 | 24632.58187 | 7.111503559 |
| UIJ69434.1 | GntR_family_transcriptional_regulator_[Bacillus_cereus]                                      | CPTF_zcontrol   | 166981.6667 | 157566.971  | 94.36183875 |
| UIJ69438.1 | L-serine_ammonia-lyase_iron-sulfur-dependent_subunit_beta_[Bacillus_cereus]                  | CPTF_Al         | 88268.7     | 49886.85796 | 56.51704167 |
| UIJ69438.1 | L-serine_ammonia-lyase_iron-sulfur-dependent_subunit_beta_[Bacillus_cereus]                  | CPTF_Cd         | 102861.2333 | 58277.20753 | 56.65614307 |
| UIJ69438.1 | L-serine_ammonia-lyase_iron-sulfur-dependent_subunit_beta_[Bacillus_cereus]                  | CPTF_Co         | 128264.6667 | 24119.72415 | 18.80465196 |
| UIJ69438.1 | L-serine_ammonia-lyase_iron-sulfur-dependent_subunit_beta_[Bacillus_cereus]                  | CPTF_Cu         | 123284.9667 | 48306.53427 | 39.18282624 |
| UIJ69438.1 | L-serine_ammonia-lyase_iron-sulfur-dependent_subunit_beta_[Bacillus_cereus]                  | CPTF_Fe         | 96577.26667 | 62693.7812  | 64.91567153 |
| UIJ69438.1 | L-serine_ammonia-lyase_iron-sulfur-dependent_subunit_beta_[Bacillus_cereus]                  | CPTF_Mn         | 68634.9     | 59807.59242 | 87.13874781 |
| UIJ69438.1 | L-serine_ammonia-lyase_iron-sulfur-dependent_subunit_beta_[Bacillus_cereus]                  | CPTF_Ni         | 164719.1667 | 18641.93822 | 11.31740683 |
| UIJ69438.1 | L-serine_ammonia-lyase_iron-sulfur-dependent_subunit_beta_[Bacillus_cereus]                  | CPTF_U          | 47113.73333 | 56333.22515 | 119.5685868 |
| UIJ69438.1 | L-serine_ammonia-lyase_iron-sulfur-dependent_subunit_beta_[Bacillus_cereus]                  | CPTF_metals_mix | 269295.6667 | 30217.57532 | 11.22096605 |
| UIJ69438.1 | L-serine_ammonia-lyase_iron-sulfur-dependent_subunit_beta_[Bacillus_cereus]                  | CPTF_zcontrol   | 75157.36667 | 50322.82942 | 66.95661603 |
| UIJ69439.1 | BrxA/BrxB_family_bacilliredoxin_[Bacillus_cereus]                                            | CPTF_Al         | 660914.4333 | 155366.4154 | 23.5077958  |
| UIJ69439.1 | BrxA/BrxB_family_bacilliredoxin_[Bacillus_cereus]                                            | CPTF_Cd         | 773002.9667 | 89816.5663  | 11.61917485 |
| UIJ69439.1 | BrxA/BrxB_family_bacilliredoxin_[Bacillus_cereus]                                            | CPTF_Co         | 768544.8    | 77500.94448 | 10.08411539 |
| UIJ69439.1 | BrxA/BrxB_family_bacilliredoxin_[Bacillus_cereus]                                            | CPTF_Cu         | 613073.4    | 83704.88994 | 13.65332274 |
| UIJ69439.1 | BrxA/BrxB_family_bacilliredoxin_[Bacillus_cereus]                                            | CPTF_Fe         | 558110.5333 | 20703.63778 | 3.709594524 |
| UIJ69439.1 | BrxA/BrxB_family_bacilliredoxin_[Bacillus_cereus]                                            | CPTF_Mn         | 632144.7333 | 110475.8922 | 17.47636045 |
| UIJ69439.1 | BrxA/BrxB_family_bacilliredoxin_[Bacillus_cereus]                                            | CPTF_Ni         | 525732.9333 | 82883.25431 | 15.76527721 |
| UIJ69439.1 | BrxA/BrxB_family_bacilliredoxin_[Bacillus_cereus]                                            | CPTF_U          | 254849.9667 | 130589.8272 | 51.24184591 |
| UIJ69439.1 | BrxA/BrxB_family_bacilliredoxin_[Bacillus_cereus]                                            | CPTF_metals_mix | 822142.2667 | 45600.79332 | 5.546581798 |
| UIJ69439.1 | BrxA/BrxB_family_bacilliredoxin_[Bacillus_cereus]                                            | CPTF_zcontrol   | 585386.3333 | 88704.24749 | 15.15311213 |
| UIJ69446.1 | flavodoxin-dependent_(E)-4-hydroxy-3-methylbut-2-enyl-diphosphate_synthase_[Bacillus_cereus] | CPTF_Al         | 305220      | 277013.3137 | 90.75857209 |
| UIJ69446.1 | flavodoxin-dependent_(E)-4-hydroxy-3-methylbut-2-enyl-diphosphate_synthase_[Bacillus_cereus] | CPTF_Cd         | 235717.3333 | 204881.2435 | 86.91819165 |
| UIJ69446.1 | flavodoxin-dependent_(E)-4-hydroxy-3-methylbut-2-enyl-diphosphate_synthase_[Bacillus_cereus] | CPTF_Co         | 130118      | 225370.987  | 173.2050808 |
| UIJ69446.1 | flavodoxin-dependent_(E)-4-hydroxy-3-methylbut-2-enyl-diphosphate_synthase_[Bacillus_cereus] | CPTF_Cu         | 293497.3333 | 321279.496  | 109.4658995 |
| UIJ69446.1 | flavodoxin-dependent_(E)-4-hydroxy-3-methylbut-2-enyl-diphosphate_synthase_[Bacillus_cereus] | CPTF_Fe         | 126688.3333 | 219430.6301 | 173.2050808 |
| UIJ69446.1 | flavodoxin-dependent_(E)-4-hydroxy-3-methylbut-2-enyl-diphosphate_synthase_[Bacillus_cereus] | CPTF_Mn         | 138533.0333 | 167373.6732 | 120.8186013 |
| UIJ69446.1 | flavodoxin-dependent_(E)-4-hydroxy-3-methylbut-2-enyl-diphosphate_synthase_[Bacillus_cereus] | CPTF_Ni         | 295617.3333 | 123933.8049 | 41.92372739 |
| UIJ69446.1 | flavodoxin-dependent_(E)-4-hydroxy-3-methylbut-2-enyl-diphosphate_synthase_[Bacillus_cereus] | CPTF_U          | 278994.6667 | 247881.059  | 88.8479561  |
| UIJ69446.1 | flavodoxin-dependent_(E)-4-hydroxy-3-methylbut-2-enyl-diphosphate_synthase_[Bacillus_cereus] | CPTF_metals_mix | 1918872.367 | 227874.2281 | 11.87542392 |
| UIJ69446.1 | flavodoxin-dependent_(E)-4-hydroxy-3-methylbut-2-enyl-diphosphate_synthase_[Bacillus_cereus] | CPTF_zcontrol   | 0           | 0           | 0           |
| UIJ69448.1 | tRNA_2-thiouridine(34)_synthase_MnmA_[Bacillus_cereus]                                       | CPTF_Al         | 0           | 0           | 0           |
| UIJ69448.1 | tRNA_2-thiouridine(34)_synthase_MnmA_[Bacillus_cereus]                                       | CPTF_Cd         | 151851.1    | 114976.9198 | 75.71688303 |
| UIJ69448.1 | tRNA_2-thiouridine(34)_synthase_MnmA_[Bacillus_cereus]                                       | CPTF_Co         | 54851.83333 | 48413.34647 | 88.2620389  |
| UIJ69448.1 | tRNA_2-thiouridine(34)_synthase_MnmA_[Bacillus_cereus]                                       | CPTF_Cu         | 14551.46667 | 25203.87959 | 173.2050808 |
| UIJ69448.1 | tRNA_2-thiouridine(34)_synthase_MnmA_[Bacillus_cereus]                                       | CPTF_Fe         | 52173.73333 | 45195.21789 | 86.62446599 |
| UIJ69448.1 | tRNA_2-thiouridine(34)_synthase_MnmA_[Bacillus_cereus]                                       | CPTF_Mn         | 42525       | 73655.46059 | 173.2050808 |
| UIJ69448.1 | tRNA_2-thiouridine(34)_synthase_MnmA_[Bacillus_cereus]                                       | CPTF_Ni         | 42753.53333 | 38419.73179 | 89.86329034 |
| UIJ69448.1 | tRNA_2-thiouridine(34)_synthase_MnmA_[Bacillus_cereus]                                       | CPTF_U          | 0           | 0           | 0           |
| UIJ69448.1 | tRNA_2-thiouridine(34)_synthase_MnmA_[Bacillus_cereus]                                       | CPTF_metals_mix | 359303.3333 | 16129.96507 | 4.48923335  |
| UIJ69448.1 | tRNA_2-thiouridine(34)_synthase_MnmA_[Bacillus_cereus]                                       | CPTF_zcontrol   | 37389.36667 | 34506.20216 | 92.28881159 |
| UIJ69450.1 | DNA_polymerase/3'-5'_exonuclease_PolX_[Bacillus_cereus]                                      | CPTF_Al         | 456570.6667 | 170996.117  | 37.45227837 |
| UIJ69450.1 | DNA_polymerase/3'-5'_exonuclease_PolX_[Bacillus_cereus]                                      | CPTF_Cd         | 347248.3333 | 247019.9886 | 71.13640725 |
| UIJ69450.1 | DNA_polymerase/3'-5'_exonuclease_PolX_[Bacillus_cereus]                                      | CPTF_Co         | 433125.6667 | 275708.7693 | 63.65560633 |
| UIJ69450.1 | DNA_polymerase/3'-5'_exonuclease_PolX_[Bacillus_cereus]                                      | CPTF_Cu         | 571148.4667 | 43807.86591 | 7.670136307 |
| UIJ69450.1 | DNA_polymerase/3'-5'_exonuclease_PolX_[Bacillus_cereus]                                      | CPTF_Fe         | 372223.3333 | 99868.30154 | 26.83020988 |
| UIJ69450.1 | DNA_polymerase/3'-5'_exonuclease_PolX_[Bacillus_cereus]                                      | CPTF_Mn         | 221705.6667 | 97873.73525 | 44.14579777 |
| UIJ69450.1 | DNA_polymerase/3'-5'_exonuclease_PolX_[Bacillus_cereus]                                      | CPTF_Ni         | 366188.9333 | 104162.7312 | 28.44507895 |
| UIJ69450.1 | DNA_polymerase/3'-5'_exonuclease_PolX_[Bacillus_cereus]                                      | CPTF_U          | 163229.6333 | 282722.0182 | 173.2050808 |
| UIJ69450.1 | DNA_polymerase/3'-5'_exonuclease_PolX_[Bacillus_cereus]                                      | CPTF_metals_mix | 335982.9    | 77963.71936 | 23.20466886 |
| UIJ69450.1 | DNA_polymerase/3'-5'_exonuclease_PolX_[Bacillus_cereus]                                      | CPTF_zcontrol   | 365703.3333 | 138037.2456 | 37.74568976 |
| UIJ69451.1 | S-adenosylmethionine_decarboxylase_proenzyme_[Bacillus_cereus]                               | CPTF_Al         | 66850.1     | 24619.85236 | 36.82844507 |
| UIJ69451.1 | S-adenosylmethionine_decarboxylase_proenzyme_[Bacillus_cereus]                               | CPTF_Cd         | 70278.33333 | 12127.65893 | 17.25661147 |
| UIJ69451.1 | S-adenosylmethionine_decarboxylase_proenzyme_[Bacillus_cereus]                               | CPTF_Co         | 334021.6333 | 72903.6451  | 21.82602497 |
| UIJ69451.1 | S-adenosylmethionine_decarboxylase_proenzyme_[Bacillus_cereus]                               | CPTF_Cu         | 103674.9333 | 179570.252  | 173.2050808 |
| UIJ69451.1 | S-adenosylmethionine_decarboxylase_proenzyme_[Bacillus_cereus]                               | CPTF_Fe         | 40031.1     | 36434.81957 | 91.01628375 |
| UIJ69451.1 | S-adenosylmethionine_decarboxylase_proenzyme_[Bacillus_cereus]                               | CPTF_Mn         | 166687.6333 | 95021.45821 | 57.00570361 |
| UIJ69451.1 | S-adenosylmethionine_decarboxylase_proenzyme_[Bacillus_cereus]                               | CPTF_Ni         | 185012.9667 | 91746.83178 | 49.58940632 |
| UIJ69451.1 | S-adenosylmethionine_decarboxylase_proenzyme_[Bacillus_cereus]                               | CPTF_U          | 315636      | 20700.73769 | 6.558420995 |

|            |                                                                     |                 |             |             |             |
|------------|---------------------------------------------------------------------|-----------------|-------------|-------------|-------------|
| UIJ69451.1 | S-adenosylmethionine_decarboxylase_proenzyme_[Bacillus_cereus]      | CPTF_metals_mix | 84740.66667 | 146775.1401 | 173.2050808 |
| UIJ69451.1 | S-adenosylmethionine_decarboxylase_proenzyme_[Bacillus_cereus]      | CPTF_zcontrol   | 32381.66667 | 56086.6919  | 173.2050808 |
| UIJ69452.1 | NAD-dependent_malic_enzyme_[Bacillus_cereus]                        | CPTF_Al         | 558209.6    | 91487.25214 | 16.38940859 |
| UIJ69452.1 | NAD-dependent_malic_enzyme_[Bacillus_cereus]                        | CPTF_Cd         | 947360.4333 | 240779.268  | 25.41580369 |
| UIJ69452.1 | NAD-dependent_malic_enzyme_[Bacillus_cereus]                        | CPTF_Co         | 588433.2667 | 146391.3789 | 24.87816159 |
| UIJ69452.1 | NAD-dependent_malic_enzyme_[Bacillus_cereus]                        | CPTF_Cu         | 602724      | 96100.79098 | 15.94441087 |
| UIJ69452.1 | NAD-dependent_malic_enzyme_[Bacillus_cereus]                        | CPTF_Fe         | 647377.3333 | 128918.2237 | 19.91392301 |
| UIJ69452.1 | NAD-dependent_malic_enzyme_[Bacillus_cereus]                        | CPTF_Mn         | 787263.2667 | 271772.5152 | 34.52117312 |
| UIJ69452.1 | NAD-dependent_malic_enzyme_[Bacillus_cereus]                        | CPTF_Ni         | 355245.5333 | 127287.4255 | 35.83083065 |
| UIJ69452.1 | NAD-dependent_malic_enzyme_[Bacillus_cereus]                        | CPTF_U          | 233163.1    | 74740.0361  | 32.05483033 |
| UIJ69452.1 | NAD-dependent_malic_enzyme_[Bacillus_cereus]                        | CPTF_metals_mix | 1721338.167 | 247473.7608 | 14.37682412 |
| UIJ69452.1 | NAD-dependent_malic_enzyme_[Bacillus_cereus]                        | CPTF_zcontrol   | 438594.2333 | 153305.9305 | 34.9539321  |
| UIJ69455.1 | acetyltransferase_[Bacillus_cereus]                                 | CPTF_Al         | 126579.7333 | 46477.18431 | 36.71771387 |
| UIJ69455.1 | acetyltransferase_[Bacillus_cereus]                                 | CPTF_Cd         | 182416.8    | 159780.8818 | 87.59110003 |
| UIJ69455.1 | acetyltransferase_[Bacillus_cereus]                                 | CPTF_Co         | 72904.13333 | 67786.91444 | 92.98089331 |
| UIJ69455.1 | acetyltransferase_[Bacillus_cereus]                                 | CPTF_Cu         | 62841       | 108843.8048 | 173.2050808 |
| UIJ69455.1 | acetyltransferase_[Bacillus_cereus]                                 | CPTF_Fe         | 0           | 0           | 0           |
| UIJ69455.1 | acetyltransferase_[Bacillus_cereus]                                 | CPTF_Mn         | 42201.33333 | 73094.85348 | 173.2050808 |
| UIJ69455.1 | acetyltransferase_[Bacillus_cereus]                                 | CPTF_Ni         | 0           | 0           | 0           |
| UIJ69455.1 | acetyltransferase_[Bacillus_cereus]                                 | CPTF_U          | 43696       | 75683.69209 | 173.2050808 |
| UIJ69455.1 | acetyltransferase_[Bacillus_cereus]                                 | CPTF_metals_mix | 53195       | 92136.44271 | 173.2050808 |
| UIJ69455.1 | acetyltransferase_[Bacillus_cereus]                                 | CPTF_zcontrol   | 175987.1667 | 72073.42902 | 40.95379816 |
| UIJ69464.1 | glycogen_synthase_GlgA_[Bacillus_cereus]                            | CPTF_Al         | 4030632.467 | 207217.3561 | 5.141063043 |
| UIJ69464.1 | glycogen_synthase_GlgA_[Bacillus_cereus]                            | CPTF_Cd         | 3708979.633 | 309669.3742 | 8.349179688 |
| UIJ69464.1 | glycogen_synthase_GlgA_[Bacillus_cereus]                            | CPTF_Co         | 3769974.867 | 1161823.789 | 30.81781259 |
| UIJ69464.1 | glycogen_synthase_GlgA_[Bacillus_cereus]                            | CPTF_Cu         | 3410093.5   | 1302951.998 | 38.20868837 |
| UIJ69464.1 | glycogen_synthase_GlgA_[Bacillus_cereus]                            | CPTF_Fe         | 3549398.633 | 1367297.474 | 38.52194739 |
| UIJ69464.1 | glycogen_synthase_GlgA_[Bacillus_cereus]                            | CPTF_Mn         | 2293817.8   | 160486.9616 | 6.996499964 |
| UIJ69464.1 | glycogen_synthase_GlgA_[Bacillus_cereus]                            | CPTF_Ni         | 4000735.4   | 1305701.376 | 32.63653418 |
| UIJ69464.1 | glycogen_synthase_GlgA_[Bacillus_cereus]                            | CPTF_U          | 2461222.667 | 1566003.785 | 63.62706661 |
| UIJ69464.1 | glycogen_synthase_GlgA_[Bacillus_cereus]                            | CPTF_metals_mix | 1563141.267 | 113696.371  | 7.273582588 |
| UIJ69464.1 | glycogen_synthase_GlgA_[Bacillus_cereus]                            | CPTF_zcontrol   | 4285373.833 | 201813.3448 | 4.709352152 |
| UIJ69465.1 | UTP--glucose-1-phosphate_uridylyltransferase_GalU_[Bacillus_cereus] | CPTF_Al         | 5916698     | 373985.7472 | 6.320852395 |
| UIJ69465.1 | UTP--glucose-1-phosphate_uridylyltransferase_GalU_[Bacillus_cereus] | CPTF_Cd         | 5990580.367 | 182856.7378 | 3.052404385 |
| UIJ69465.1 | UTP--glucose-1-phosphate_uridylyltransferase_GalU_[Bacillus_cereus] | CPTF_Co         | 5538925.633 | 254419.7847 | 4.593305661 |
| UIJ69465.1 | UTP--glucose-1-phosphate_uridylyltransferase_GalU_[Bacillus_cereus] | CPTF_Cu         | 5877148     | 136455.446  | 2.321797002 |
| UIJ69465.1 | UTP--glucose-1-phosphate_uridylyltransferase_GalU_[Bacillus_cereus] | CPTF_Fe         | 5585719.8   | 384226.7105 | 6.878732271 |
| UIJ69465.1 | UTP--glucose-1-phosphate_uridylyltransferase_GalU_[Bacillus_cereus] | CPTF_Mn         | 5527005.567 | 446808.7237 | 8.084101207 |
| UIJ69465.1 | UTP--glucose-1-phosphate_uridylyltransferase_GalU_[Bacillus_cereus] | CPTF_Ni         | 5147965.667 | 169606.7045 | 3.294635502 |
| UIJ69465.1 | UTP--glucose-1-phosphate_uridylyltransferase_GalU_[Bacillus_cereus] | CPTF_U          | 5343702.333 | 257051.8117 | 4.810369211 |
| UIJ69465.1 | UTP--glucose-1-phosphate_uridylyltransferase_GalU_[Bacillus_cereus] | CPTF_metals_mix | 5387441.467 | 215895.154  | 4.007378185 |
| UIJ69465.1 | UTP--glucose-1-phosphate_uridylyltransferase_GalU_[Bacillus_cereus] | CPTF_zcontrol   | 5659727.933 | 221348.5581 | 3.910939901 |
| UIJ69468.1 | YutD_family_protein_[Bacillus_cereus]                               | CPTF_Al         | 565402.6333 | 81981.89213 | 14.49973652 |
| UIJ69468.1 | YutD_family_protein_[Bacillus_cereus]                               | CPTF_Cd         | 503087.3333 | 2741.970338 | 0.545028697 |
| UIJ69468.1 | YutD_family_protein_[Bacillus_cereus]                               | CPTF_Co         | 598050.9333 | 97574.90156 | 16.31548353 |
| UIJ69468.1 | YutD_family_protein_[Bacillus_cereus]                               | CPTF_Cu         | 611203      | 56333.47727 | 9.216819496 |
| UIJ69468.1 | YutD_family_protein_[Bacillus_cereus]                               | CPTF_Fe         | 636342.2    | 84151.16048 | 13.22419926 |
| UIJ69468.1 | YutD_family_protein_[Bacillus_cereus]                               | CPTF_Mn         | 668856      | 46457.85414 | 6.94586789  |
| UIJ69468.1 | YutD_family_protein_[Bacillus_cereus]                               | CPTF_Ni         | 726425.7667 | 179551.4813 | 24.71711351 |
| UIJ69468.1 | YutD_family_protein_[Bacillus_cereus]                               | CPTF_U          | 728123.6667 | 210418.7462 | 28.89876484 |
| UIJ69468.1 | YutD_family_protein_[Bacillus_cereus]                               | CPTF_metals_mix | 634250.3333 | 40991.40038 | 6.462968677 |
| UIJ69468.1 | YutD_family_protein_[Bacillus_cereus]                               | CPTF_zcontrol   | 618428.3    | 140173.7184 | 22.66612288 |
| UIJ69475.1 | TIGR00730_family_Rossman_fold_protein_[Bacillus_cereus]             | CPTF_Al         | 171416.1    | 76313.45587 | 44.51942138 |
| UIJ69475.1 | TIGR00730_family_Rossman_fold_protein_[Bacillus_cereus]             | CPTF_Cd         | 113026.6667 | 26284.55614 | 23.2551812  |
| UIJ69475.1 | TIGR00730_family_Rossman_fold_protein_[Bacillus_cereus]             | CPTF_Co         | 125499.6667 | 962.819611  | 0.767188979 |
| UIJ69475.1 | TIGR00730_family_Rossman_fold_protein_[Bacillus_cereus]             | CPTF_Cu         | 106506.9667 | 43306.98277 | 40.66117375 |
| UIJ69475.1 | TIGR00730_family_Rossman_fold_protein_[Bacillus_cereus]             | CPTF_Fe         | 135615.7667 | 58236.06771 | 42.94195959 |
| UIJ69475.1 | TIGR00730_family_Rossman_fold_protein_[Bacillus_cereus]             | CPTF_Mn         | 223485      | 125059.9698 | 55.95899938 |
| UIJ69475.1 | TIGR00730_family_Rossman_fold_protein_[Bacillus_cereus]             | CPTF_Ni         | 175826.8667 | 53342.01856 | 30.33780876 |
| UIJ69475.1 | TIGR00730_family_Rossman_fold_protein_[Bacillus_cereus]             | CPTF_U          | 92942.2     | 76894.28426 | 82.73344536 |
| UIJ69475.1 | TIGR00730_family_Rossman_fold_protein_[Bacillus_cereus]             | CPTF_metals_mix | 121352.5333 | 28694.88604 | 23.64588958 |



|            |                                                          |                 |             |             |             |
|------------|----------------------------------------------------------|-----------------|-------------|-------------|-------------|
| UIJ69475.1 | TIGR00730_family_Rossmann_fold_protein_[Bacillus_cereus] | CPTF_zcontrol   | 107950.2    | 68402.85292 | 63.36519332 |
| UIJ69478.1 | carboxylesterase_[Bacillus_cereus]                       | CPTF_Al         | 82449.66667 | 71734.24517 | 87.00368124 |
| UIJ69478.1 | carboxylesterase_[Bacillus_cereus]                       | CPTF_Cd         | 114625.5    | 19726.65051 | 17.20965275 |
| UIJ69478.1 | carboxylesterase_[Bacillus_cereus]                       | CPTF_Co         | 138292.3333 | 21817.60299 | 15.77643711 |
| UIJ69478.1 | carboxylesterase_[Bacillus_cereus]                       | CPTF_Cu         | 155779.3333 | 40134.86152 | 25.76391917 |
| UIJ69478.1 | carboxylesterase_[Bacillus_cereus]                       | CPTF_Fe         | 98437.76667 | 72671.25322 | 73.82456519 |
| UIJ69478.1 | carboxylesterase_[Bacillus_cereus]                       | CPTF_Mn         | 46619       | 80746.4766  | 173.2050808 |
| UIJ69478.1 | carboxylesterase_[Bacillus_cereus]                       | CPTF_Ni         | 107779.3667 | 55920.00982 | 51.88378031 |
| UIJ69478.1 | carboxylesterase_[Bacillus_cereus]                       | CPTF_U          | 96938       | 84001.85072 | 86.65523398 |
| UIJ69478.1 | carboxylesterase_[Bacillus_cereus]                       | CPTF_metals_mix | 257687.7333 | 145661.0122 | 56.52617233 |
| UIJ69478.1 | carboxylesterase_[Bacillus_cereus]                       | CPTF_zcontrol   | 81112       | 71830.19878 | 88.55680883 |
| UIJ69479.1 | S41_family_peptidase_[Bacillus_cereus]                   | CPTF_Al         | 0           | 0           | 0           |
| UIJ69479.1 | S41_family_peptidase_[Bacillus_cereus]                   | CPTF_Cd         | 43200       | 74824.59489 | 173.2050808 |
| UIJ69479.1 | S41_family_peptidase_[Bacillus_cereus]                   | CPTF_Co         | 0           | 0           | 0           |
| UIJ69479.1 | S41_family_peptidase_[Bacillus_cereus]                   | CPTF_Cu         | 37756.66667 | 65396.46499 | 173.2050808 |
| UIJ69479.1 | S41_family_peptidase_[Bacillus_cereus]                   | CPTF_Fe         | 0           | 0           | 0           |
| UIJ69479.1 | S41_family_peptidase_[Bacillus_cereus]                   | CPTF_Mn         | 0           | 0           | 0           |
| UIJ69479.1 | S41_family_peptidase_[Bacillus_cereus]                   | CPTF_Ni         | 0           | 0           | 0           |
| UIJ69479.1 | S41_family_peptidase_[Bacillus_cereus]                   | CPTF_U          | 0           | 0           | 0           |
| UIJ69479.1 | S41_family_peptidase_[Bacillus_cereus]                   | CPTF_metals_mix | 53879.76667 | 76797.30891 | 142.5345982 |
| UIJ69479.1 | S41_family_peptidase_[Bacillus_cereus]                   | CPTF_zcontrol   | 37326.33333 | 64651.10579 | 173.2050808 |
| UIJ69480.1 | cell_division_ATP-binding_protein_FtsE_[Bacillus_cereus] | CPTF_Al         | 1273995     | 105066.7314 | 8.247028552 |
| UIJ69480.1 | cell_division_ATP-binding_protein_FtsE_[Bacillus_cereus] | CPTF_Cd         | 1323201     | 36395.40691 | 2.750557694 |
| UIJ69480.1 | cell_division_ATP-binding_protein_FtsE_[Bacillus_cereus] | CPTF_Co         | 1314815.667 | 27388.23971 | 2.083047868 |
| UIJ69480.1 | cell_division_ATP-binding_protein_FtsE_[Bacillus_cereus] | CPTF_Cu         | 1358846.233 | 78072.87582 | 5.745526896 |
| UIJ69480.1 | cell_division_ATP-binding_protein_FtsE_[Bacillus_cereus] | CPTF_Fe         | 1306976.667 | 150171.1901 | 11.48996719 |
| UIJ69480.1 | cell_division_ATP-binding_protein_FtsE_[Bacillus_cereus] | CPTF_Mn         | 1233179.333 | 105906.6289 | 8.588096319 |
| UIJ69480.1 | cell_division_ATP-binding_protein_FtsE_[Bacillus_cereus] | CPTF_Ni         | 1327890.333 | 125208.6222 | 9.429138769 |
| UIJ69480.1 | cell_division_ATP-binding_protein_FtsE_[Bacillus_cereus] | CPTF_U          | 1540303     | 267125.5224 | 17.34240097 |
| UIJ69480.1 | cell_division_ATP-binding_protein_FtsE_[Bacillus_cereus] | CPTF_metals_mix | 1814699.633 | 298456.0172 | 16.44657946 |
| UIJ69480.1 | cell_division_ATP-binding_protein_FtsE_[Bacillus_cereus] | CPTF_zcontrol   | 1325069     | 126826.6175 | 9.571321755 |
| UIJ69483.1 | cold_shock_protein_CspC_[Bacillus_cereus]                | CPTF_Al         | 373081      | 28108.94712 | 7.534274626 |
| UIJ69483.1 | cold_shock_protein_CspC_[Bacillus_cereus]                | CPTF_Cd         | 471726.3333 | 38597.6676  | 8.182216017 |
| UIJ69483.1 | cold_shock_protein_CspC_[Bacillus_cereus]                | CPTF_Co         | 381663.3333 | 49535.58152 | 12.97886834 |
| UIJ69483.1 | cold_shock_protein_CspC_[Bacillus_cereus]                | CPTF_Cu         | 294546.6667 | 117171.876  | 39.78041146 |
| UIJ69483.1 | cold_shock_protein_CspC_[Bacillus_cereus]                | CPTF_Fe         | 419714.3333 | 220240.1883 | 52.47383062 |
| UIJ69483.1 | cold_shock_protein_CspC_[Bacillus_cereus]                | CPTF_Mn         | 270801.7    | 149871.718  | 55.34371388 |
| UIJ69483.1 | cold_shock_protein_CspC_[Bacillus_cereus]                | CPTF_Ni         | 224248.3333 | 90468.40803 | 40.34295671 |
| UIJ69483.1 | cold_shock_protein_CspC_[Bacillus_cereus]                | CPTF_U          | 313840.3333 | 86571.73979 | 27.58464435 |
| UIJ69483.1 | cold_shock_protein_CspC_[Bacillus_cereus]                | CPTF_metals_mix | 266256.3333 | 83746.57143 | 31.45336315 |
| UIJ69483.1 | cold_shock_protein_CspC_[Bacillus_cereus]                | CPTF_zcontrol   | 327149      | 58905.50846 | 18.00571252 |
| UIJ69487.1 | glutamine-hydrolyzing_GMP_synthase_[Bacillus_cereus]     | CPTF_Al         | 8171965.933 | 444718.8792 | 5.442006035 |
| UIJ69487.1 | glutamine-hydrolyzing_GMP_synthase_[Bacillus_cereus]     | CPTF_Cd         | 9923635.567 | 325268.8493 | 3.277718606 |
| UIJ69487.1 | glutamine-hydrolyzing_GMP_synthase_[Bacillus_cereus]     | CPTF_Co         | 8253282.667 | 401937.8706 | 4.870036406 |
| UIJ69487.1 | glutamine-hydrolyzing_GMP_synthase_[Bacillus_cereus]     | CPTF_Cu         | 7727854.167 | 555917.4446 | 7.193684464 |
| UIJ69487.1 | glutamine-hydrolyzing_GMP_synthase_[Bacillus_cereus]     | CPTF_Fe         | 9411350.167 | 650501.1619 | 6.911879277 |
| UIJ69487.1 | glutamine-hydrolyzing_GMP_synthase_[Bacillus_cereus]     | CPTF_Mn         | 8325437.467 | 620055.3169 | 7.447720547 |
| UIJ69487.1 | glutamine-hydrolyzing_GMP_synthase_[Bacillus_cereus]     | CPTF_Ni         | 7430158.867 | 718873.9099 | 9.675081284 |
| UIJ69487.1 | glutamine-hydrolyzing_GMP_synthase_[Bacillus_cereus]     | CPTF_U          | 7908575.367 | 568554.5278 | 7.189089077 |
| UIJ69487.1 | glutamine-hydrolyzing_GMP_synthase_[Bacillus_cereus]     | CPTF_metals_mix | 10104140.83 | 1051461.102 | 10.40623958 |
| UIJ69487.1 | glutamine-hydrolyzing_GMP_synthase_[Bacillus_cereus]     | CPTF_zcontrol   | 8645139.667 | 883610.4781 | 10.22089304 |
| UIJ69494.1 | DUF3981_domain-containing_protein_[Bacillus_cereus]      | CPTF_Al         | 32409.56667 | 56135.01612 | 173.2050808 |
| UIJ69494.1 | DUF3981_domain-containing_protein_[Bacillus_cereus]      | CPTF_Cd         | 121776      | 23448.59322 | 19.25551276 |
| UIJ69494.1 | DUF3981_domain-containing_protein_[Bacillus_cereus]      | CPTF_Co         | 19380.36667 | 33567.77974 | 173.2050808 |
| UIJ69494.1 | DUF3981_domain-containing_protein_[Bacillus_cereus]      | CPTF_Cu         | 0           | 0           | 0           |
| UIJ69494.1 | DUF3981_domain-containing_protein_[Bacillus_cereus]      | CPTF_Fe         | 42178.13333 | 45824.03185 | 108.644049  |
| UIJ69494.1 | DUF3981_domain-containing_protein_[Bacillus_cereus]      | CPTF_Mn         | 54005.66667 | 93540.55856 | 173.2050808 |
| UIJ69494.1 | DUF3981_domain-containing_protein_[Bacillus_cereus]      | CPTF_Ni         | 0           | 0           | 0           |
| UIJ69494.1 | DUF3981_domain-containing_protein_[Bacillus_cereus]      | CPTF_U          | 0           | 0           | 0           |
| UIJ69494.1 | DUF3981_domain-containing_protein_[Bacillus_cereus]      | CPTF_metals_mix | 234392      | 42613.99338 | 18.18065181 |
| UIJ69494.1 | DUF3981_domain-containing_protein_[Bacillus_cereus]      | CPTF_zcontrol   | 0           | 0           | 0           |

|            |                                                                  |                 |             |             |             |
|------------|------------------------------------------------------------------|-----------------|-------------|-------------|-------------|
| UIJ69496.1 | 50S_ribosomal_protein_L18_[Bacillus_cereus]                      | CPTF_Al         | 2540532.667 | 129471.5145 | 5.096234982 |
| UIJ69496.1 | 50S_ribosomal_protein_L18_[Bacillus_cereus]                      | CPTF_Cd         | 2304431.333 | 488826.3632 | 21.21245082 |
| UIJ69496.1 | 50S_ribosomal_protein_L18_[Bacillus_cereus]                      | CPTF_Co         | 2539127     | 206536.9298 | 8.134170909 |
| UIJ69496.1 | 50S_ribosomal_protein_L18_[Bacillus_cereus]                      | CPTF_Cu         | 2121395     | 134288.3455 | 6.330190533 |
| UIJ69496.1 | 50S_ribosomal_protein_L18_[Bacillus_cereus]                      | CPTF_Fe         | 2105220.333 | 74695.74557 | 3.548120089 |
| UIJ69496.1 | 50S_ribosomal_protein_L18_[Bacillus_cereus]                      | CPTF_Mn         | 2106983.333 | 102287.3914 | 4.85484841  |
| UIJ69496.1 | 50S_ribosomal_protein_L18_[Bacillus_cereus]                      | CPTF_Ni         | 2295001.333 | 409244.0158 | 17.8319729  |
| UIJ69496.1 | 50S_ribosomal_protein_L18_[Bacillus_cereus]                      | CPTF_U          | 1576862.333 | 38951.84638 | 2.470212241 |
| UIJ69496.1 | 50S_ribosomal_protein_L18_[Bacillus_cereus]                      | CPTF_metals_mix | 1834970.867 | 206479.4507 | 11.25246479 |
| UIJ69496.1 | 50S_ribosomal_protein_L18_[Bacillus_cereus]                      | CPTF_zcontrol   | 1632253.667 | 122467.2049 | 7.50295174  |
| UIJ69497.1 | septation_regulator_SpoVG_[Bacillus_cereus]                      | CPTF_Al         | 3090967.667 | 814923.3672 | 26.36466812 |
| UIJ69497.1 | septation_regulator_SpoVG_[Bacillus_cereus]                      | CPTF_Cd         | 4780255.233 | 121649.7087 | 2.544837101 |
| UIJ69497.1 | septation_regulator_SpoVG_[Bacillus_cereus]                      | CPTF_Co         | 2531944     | 719133.6835 | 28.40243242 |
| UIJ69497.1 | septation_regulator_SpoVG_[Bacillus_cereus]                      | CPTF_Cu         | 6016618.333 | 3081645.446 | 51.21889533 |
| UIJ69497.1 | septation_regulator_SpoVG_[Bacillus_cereus]                      | CPTF_Fe         | 4200421.267 | 1627235.565 | 38.73981827 |
| UIJ69497.1 | septation_regulator_SpoVG_[Bacillus_cereus]                      | CPTF_Mn         | 2980790.333 | 2331757.442 | 78.22614747 |
| UIJ69497.1 | septation_regulator_SpoVG_[Bacillus_cereus]                      | CPTF_Ni         | 3795628.667 | 982084.9815 | 25.87410592 |
| UIJ69497.1 | septation_regulator_SpoVG_[Bacillus_cereus]                      | CPTF_U          | 1762568.333 | 244591.5892 | 13.87699896 |
| UIJ69497.1 | septation_regulator_SpoVG_[Bacillus_cereus]                      | CPTF_metals_mix | 701843      | 136177.5252 | 19.40284724 |
| UIJ69497.1 | septation_regulator_SpoVG_[Bacillus_cereus]                      | CPTF_zcontrol   | 4796506.333 | 292127.3271 | 6.090418875 |
| UIJ69499.1 | YbaB/Ebfc_family_nucleoid-associated_protein_[Bacillus_cereus]   | CPTF_Al         | 1048279.333 | 148451.3502 | 14.16143059 |
| UIJ69499.1 | YbaB/Ebfc_family_nucleoid-associated_protein_[Bacillus_cereus]   | CPTF_Cd         | 1032272.733 | 182940.7449 | 17.72213282 |
| UIJ69499.1 | YbaB/Ebfc_family_nucleoid-associated_protein_[Bacillus_cereus]   | CPTF_Co         | 950625.3333 | 233713.9172 | 24.58528181 |
| UIJ69499.1 | YbaB/Ebfc_family_nucleoid-associated_protein_[Bacillus_cereus]   | CPTF_Cu         | 909712.7    | 113951.0901 | 12.52605247 |
| UIJ69499.1 | YbaB/Ebfc_family_nucleoid-associated_protein_[Bacillus_cereus]   | CPTF_Fe         | 1108453.333 | 108887.8562 | 9.823404645 |
| UIJ69499.1 | YbaB/Ebfc_family_nucleoid-associated_protein_[Bacillus_cereus]   | CPTF_Mn         | 1149277.567 | 327976.2402 | 28.53760046 |
| UIJ69499.1 | YbaB/Ebfc_family_nucleoid-associated_protein_[Bacillus_cereus]   | CPTF_Ni         | 1070847.833 | 134463.6891 | 12.55675035 |
| UIJ69499.1 | YbaB/Ebfc_family_nucleoid-associated_protein_[Bacillus_cereus]   | CPTF_U          | 1097455.367 | 143933.7318 | 13.11522419 |
| UIJ69499.1 | YbaB/Ebfc_family_nucleoid-associated_protein_[Bacillus_cereus]   | CPTF_metals_mix | 1625653.5   | 42787.37132 | 2.632010531 |
| UIJ69499.1 | YbaB/Ebfc_family_nucleoid-associated_protein_[Bacillus_cereus]   | CPTF_zcontrol   | 999051.3333 | 22293.23557 | 2.231440451 |
| UIJ69500.1 | D-alanyl-D-alanine_carboxypeptidase_DacA_[Bacillus_cereus]       | CPTF_Al         | 145275.1    | 70403.30082 | 48.46205635 |
| UIJ69500.1 | D-alanyl-D-alanine_carboxypeptidase_DacA_[Bacillus_cereus]       | CPTF_Cd         | 187800.6333 | 67625.91702 | 36.00941904 |
| UIJ69500.1 | D-alanyl-D-alanine_carboxypeptidase_DacA_[Bacillus_cereus]       | CPTF_Co         | 197630.4    | 177829.9149 | 89.98105295 |
| UIJ69500.1 | D-alanyl-D-alanine_carboxypeptidase_DacA_[Bacillus_cereus]       | CPTF_Cu         | 64749.16667 | 86177.17506 | 133.0938752 |
| UIJ69500.1 | D-alanyl-D-alanine_carboxypeptidase_DacA_[Bacillus_cereus]       | CPTF_Fe         | 266950.2667 | 73056.41079 | 27.36704919 |
| UIJ69500.1 | D-alanyl-D-alanine_carboxypeptidase_DacA_[Bacillus_cereus]       | CPTF_Mn         | 152321.6667 | 174310.3067 | 114.4356614 |
| UIJ69500.1 | D-alanyl-D-alanine_carboxypeptidase_DacA_[Bacillus_cereus]       | CPTF_Ni         | 253961.5333 | 147826.6298 | 58.20827581 |
| UIJ69500.1 | D-alanyl-D-alanine_carboxypeptidase_DacA_[Bacillus_cereus]       | CPTF_U          | 237048.8667 | 63747.5353  | 26.89214937 |
| UIJ69500.1 | D-alanyl-D-alanine_carboxypeptidase_DacA_[Bacillus_cereus]       | CPTF_metals_mix | 76450.66667 | 106199.7434 | 138.9127761 |
| UIJ69500.1 | D-alanyl-D-alanine_carboxypeptidase_DacA_[Bacillus_cereus]       | CPTF_zcontrol   | 321732.7667 | 27285.86425 | 8.480909338 |
| UIJ69501.1 | GMP_reductase_[Bacillus_cereus]                                  | CPTF_Al         | 7837316.9   | 1070229.463 | 13.65555938 |
| UIJ69501.1 | GMP_reductase_[Bacillus_cereus]                                  | CPTF_Cd         | 6907095.833 | 294591.9716 | 4.265062752 |
| UIJ69501.1 | GMP_reductase_[Bacillus_cereus]                                  | CPTF_Co         | 7448408.167 | 812282.6178 | 10.90545254 |
| UIJ69501.1 | GMP_reductase_[Bacillus_cereus]                                  | CPTF_Cu         | 4998642.767 | 359099.4159 | 7.183938375 |
| UIJ69501.1 | GMP_reductase_[Bacillus_cereus]                                  | CPTF_Fe         | 6440876.7   | 254735.3958 | 3.954980163 |
| UIJ69501.1 | GMP_reductase_[Bacillus_cereus]                                  | CPTF_Mn         | 7121593.333 | 1703634.982 | 23.92210425 |
| UIJ69501.1 | GMP_reductase_[Bacillus_cereus]                                  | CPTF_Ni         | 5034035.267 | 536415.7654 | 10.65578084 |
| UIJ69501.1 | GMP_reductase_[Bacillus_cereus]                                  | CPTF_U          | 5743104.167 | 1836161.028 | 31.971578   |
| UIJ69501.1 | GMP_reductase_[Bacillus_cereus]                                  | CPTF_metals_mix | 3403639.967 | 306893.6218 | 9.016629986 |
| UIJ69501.1 | GMP_reductase_[Bacillus_cereus]                                  | CPTF_zcontrol   | 8803326.733 | 1398576.605 | 15.88691011 |
| UIJ69502.1 | ATP-binding_cassette_domain-containing_protein_[Bacillus_cereus] | CPTF_Al         | 1050629     | 42612.13927 | 4.055869319 |
| UIJ69502.1 | ATP-binding_cassette_domain-containing_protein_[Bacillus_cereus] | CPTF_Cd         | 1066345.667 | 67228.28647 | 6.304549132 |
| UIJ69502.1 | ATP-binding_cassette_domain-containing_protein_[Bacillus_cereus] | CPTF_Co         | 1109786     | 93409.46046 | 8.416889424 |
| UIJ69502.1 | ATP-binding_cassette_domain-containing_protein_[Bacillus_cereus] | CPTF_Cu         | 1131436     | 116171.1609 | 10.2675857  |
| UIJ69502.1 | ATP-binding_cassette_domain-containing_protein_[Bacillus_cereus] | CPTF_Fe         | 1097608     | 59499.0957  | 5.420796468 |
| UIJ69502.1 | ATP-binding_cassette_domain-containing_protein_[Bacillus_cereus] | CPTF_Mn         | 984455      | 227186.595  | 23.07739765 |
| UIJ69502.1 | ATP-binding_cassette_domain-containing_protein_[Bacillus_cereus] | CPTF_Ni         | 1017295.667 | 74995.78666 | 7.372073736 |
| UIJ69502.1 | ATP-binding_cassette_domain-containing_protein_[Bacillus_cereus] | CPTF_U          | 1260874     | 82651.09165 | 6.555063523 |
| UIJ69502.1 | ATP-binding_cassette_domain-containing_protein_[Bacillus_cereus] | CPTF_metals_mix | 1038406.667 | 210626.4931 | 20.28362296 |
| UIJ69502.1 | ATP-binding_cassette_domain-containing_protein_[Bacillus_cereus] | CPTF_zcontrol   | 985468      | 60313.03731 | 6.120243103 |
| UIJ69506.1 | peptide_chain_release_factor_1_[Bacillus_cereus]                 | CPTF_Al         | 1455079.067 | 154463.8557 | 10.6154957  |

|            |                                                                                         |                 |             |             |             |
|------------|-----------------------------------------------------------------------------------------|-----------------|-------------|-------------|-------------|
| UIJ69506.1 | peptide_chain_release_factor_1 [Bacillus_cereus]                                        | CPTF_Cd         | 1629989.2   | 168214.105  | 10.31995212 |
| UIJ69506.1 | peptide_chain_release_factor_1 [Bacillus_cereus]                                        | CPTF_Co         | 1649472.8   | 248234.9468 | 15.04935073 |
| UIJ69506.1 | peptide_chain_release_factor_1 [Bacillus_cereus]                                        | CPTF_Cu         | 1561136.7   | 133978.2825 | 8.582098064 |
| UIJ69506.1 | peptide_chain_release_factor_1 [Bacillus_cereus]                                        | CPTF_Fe         | 1358958.867 | 64388.14176 | 4.73804935  |
| UIJ69506.1 | peptide_chain_release_factor_1 [Bacillus_cereus]                                        | CPTF_Mn         | 1591719.967 | 461578.7293 | 28.99873966 |
| UIJ69506.1 | peptide_chain_release_factor_1 [Bacillus_cereus]                                        | CPTF_Ni         | 1489171.067 | 95728.87377 | 6.42833291  |
| UIJ69506.1 | peptide_chain_release_factor_1 [Bacillus_cereus]                                        | CPTF_U          | 1319079.033 | 272856.1477 | 20.68535249 |
| UIJ69506.1 | peptide_chain_release_factor_1 [Bacillus_cereus]                                        | CPTF_metals_mix | 3556402.033 | 209530.632  | 5.891646391 |
| UIJ69506.1 | peptide_chain_release_factor_1 [Bacillus_cereus]                                        | CPTF_zcontrol   | 1334282.767 | 59725.83458 | 4.476250167 |
| UIJ69522.1 | CalY_family_protein (plasmid) [Bacillus_cereus]                                         | CPTF_AI         | 101577.8333 | 92800.68053 | 91.35918486 |
| UIJ69522.1 | CalY_family_protein (plasmid) [Bacillus_cereus]                                         | CPTF_Cd         | 145300.3333 | 37084.45376 | 25.52262125 |
| UIJ69522.1 | CalY_family_protein (plasmid) [Bacillus_cereus]                                         | CPTF_Co         | 207909.6    | 77863.19157 | 37.45050328 |
| UIJ69522.1 | CalY_family_protein (plasmid) [Bacillus_cereus]                                         | CPTF_Cu         | 17552.7     | 30402.16821 | 173.2050808 |
| UIJ69522.1 | CalY_family_protein (plasmid) [Bacillus_cereus]                                         | CPTF_Fe         | 61348       | 106257.8529 | 173.2050808 |
| UIJ69522.1 | CalY_family_protein (plasmid) [Bacillus_cereus]                                         | CPTF_Mn         | 0           | 0           | 0           |
| UIJ69522.1 | CalY_family_protein (plasmid) [Bacillus_cereus]                                         | CPTF_Ni         | 62280.66667 | 107873.279  | 173.2050808 |
| UIJ69522.1 | CalY_family_protein (plasmid) [Bacillus_cereus]                                         | CPTF_U          | 0           | 0           | 0           |
| UIJ69522.1 | CalY_family_protein (plasmid) [Bacillus_cereus]                                         | CPTF_metals_mix | 0           | 0           | 0           |
| UIJ69522.1 | CalY_family_protein (plasmid) [Bacillus_cereus]                                         | CPTF_zcontrol   | 205429      | 115791.3134 | 56.36561214 |
| UIJ69527.1 | type_II_toxin-antitoxin_system_death-on-curing_family_toxin (plasmid) [Bacillus_cereus] | CPTF_AI         | 2163640.333 | 452446.2252 | 20.91134179 |
| UIJ69527.1 | type_II_toxin-antitoxin_system_death-on-curing_family_toxin (plasmid) [Bacillus_cereus] | CPTF_Cd         | 2440164     | 87094.43582 | 3.569204194 |
| UIJ69527.1 | type_II_toxin-antitoxin_system_death-on-curing_family_toxin (plasmid) [Bacillus_cereus] | CPTF_Co         | 2273672.267 | 221195.2845 | 9.728547412 |
| UIJ69527.1 | type_II_toxin-antitoxin_system_death-on-curing_family_toxin (plasmid) [Bacillus_cereus] | CPTF_Cu         | 2132080.067 | 443250.6203 | 20.78958606 |
| UIJ69527.1 | type_II_toxin-antitoxin_system_death-on-curing_family_toxin (plasmid) [Bacillus_cereus] | CPTF_Fe         | 2216644.667 | 266528.3338 | 12.02395395 |
| UIJ69527.1 | type_II_toxin-antitoxin_system_death-on-curing_family_toxin (plasmid) [Bacillus_cereus] | CPTF_Mn         | 2580612     | 260154.8406 | 10.08112962 |
| UIJ69527.1 | type_II_toxin-antitoxin_system_death-on-curing_family_toxin (plasmid) [Bacillus_cereus] | CPTF_Ni         | 1719615.333 | 331478.4939 | 19.27631648 |
| UIJ69527.1 | type_II_toxin-antitoxin_system_death-on-curing_family_toxin (plasmid) [Bacillus_cereus] | CPTF_U          | 2352574     | 583742.1347 | 24.81291278 |
| UIJ69527.1 | type_II_toxin-antitoxin_system_death-on-curing_family_toxin (plasmid) [Bacillus_cereus] | CPTF_metals_mix | 3498494.867 | 528103.0506 | 15.09515008 |
| UIJ69527.1 | type_II_toxin-antitoxin_system_death-on-curing_family_toxin (plasmid) [Bacillus_cereus] | CPTF_zcontrol   | 1725575.333 | 207016.2498 | 11.99694072 |
| UIJ69534.1 | hypothetical_protein_LW858_30370 (plasmid) [Bacillus_cereus]                            | CPTF_AI         | 108455.8333 | 52603.59745 | 48.50232195 |
| UIJ69534.1 | hypothetical_protein_LW858_30370 (plasmid) [Bacillus_cereus]                            | CPTF_Cd         | 43939.66667 | 76105.73513 | 173.2050808 |
| UIJ69534.1 | hypothetical_protein_LW858_30370 (plasmid) [Bacillus_cereus]                            | CPTF_Co         | 112435      | 98678.25469 | 87.76471267 |
| UIJ69534.1 | hypothetical_protein_LW858_30370 (plasmid) [Bacillus_cereus]                            | CPTF_Cu         | 65465.66667 | 113389.8608 | 173.2050808 |
| UIJ69534.1 | hypothetical_protein_LW858_30370 (plasmid) [Bacillus_cereus]                            | CPTF_Fe         | 0           | 0           | 0           |
| UIJ69534.1 | hypothetical_protein_LW858_30370 (plasmid) [Bacillus_cereus]                            | CPTF_Mn         | 48200       | 83484.84892 | 173.2050808 |
| UIJ69534.1 | hypothetical_protein_LW858_30370 (plasmid) [Bacillus_cereus]                            | CPTF_Ni         | 111533.3333 | 99171.91525 | 88.91683973 |
| UIJ69534.1 | hypothetical_protein_LW858_30370 (plasmid) [Bacillus_cereus]                            | CPTF_U          | 0           | 0           | 0           |
| UIJ69534.1 | hypothetical_protein_LW858_30370 (plasmid) [Bacillus_cereus]                            | CPTF_metals_mix | 363134.2333 | 34672.28271 | 9.548062266 |
| UIJ69534.1 | hypothetical_protein_LW858_30370 (plasmid) [Bacillus_cereus]                            | CPTF_zcontrol   | 0           | 0           | 0           |
| UIJ69541.1 | N-acetylmuramoyl-L-alanine_amidase (plasmid) [Bacillus_cereus]                          | CPTF_AI         | 189036.6    | 111123.8915 | 58.78432615 |
| UIJ69541.1 | N-acetylmuramoyl-L-alanine_amidase (plasmid) [Bacillus_cereus]                          | CPTF_Cd         | 290731.5667 | 117241.2612 | 40.32629223 |
| UIJ69541.1 | N-acetylmuramoyl-L-alanine_amidase (plasmid) [Bacillus_cereus]                          | CPTF_Co         | 250400.3333 | 147394.5705 | 58.86356802 |
| UIJ69541.1 | N-acetylmuramoyl-L-alanine_amidase (plasmid) [Bacillus_cereus]                          | CPTF_Cu         | 508547      | 20708.81445 | 4.072153498 |
| UIJ69541.1 | N-acetylmuramoyl-L-alanine_amidase (plasmid) [Bacillus_cereus]                          | CPTF_Fe         | 361679.4    | 45689.88084 | 12.63270201 |
| UIJ69541.1 | N-acetylmuramoyl-L-alanine_amidase (plasmid) [Bacillus_cereus]                          | CPTF_Mn         | 59710.1     | 66730.37586 | 111.757267  |
| UIJ69541.1 | N-acetylmuramoyl-L-alanine_amidase (plasmid) [Bacillus_cereus]                          | CPTF_Ni         | 123219      | 15961.92557 | 12.95411063 |
| UIJ69541.1 | N-acetylmuramoyl-L-alanine_amidase (plasmid) [Bacillus_cereus]                          | CPTF_U          | 144598.3333 | 13756.51211 | 9.513603504 |
| UIJ69541.1 | N-acetylmuramoyl-L-alanine_amidase (plasmid) [Bacillus_cereus]                          | CPTF_metals_mix | 523561      | 57371.25394 | 10.95789296 |
| UIJ69541.1 | N-acetylmuramoyl-L-alanine_amidase (plasmid) [Bacillus_cereus]                          | CPTF_zcontrol   | 170100.5    | 188729.4352 | 110.9517228 |
| UIJ69542.1 | polysaccharide_deacetylase (plasmid) [Bacillus_cereus]                                  | CPTF_AI         | 0           | 0           | 0           |
| UIJ69542.1 | polysaccharide_deacetylase (plasmid) [Bacillus_cereus]                                  | CPTF_Cd         | 0           | 0           | 0           |
| UIJ69542.1 | polysaccharide_deacetylase (plasmid) [Bacillus_cereus]                                  | CPTF_Co         | 0           | 0           | 0           |
| UIJ69542.1 | polysaccharide_deacetylase (plasmid) [Bacillus_cereus]                                  | CPTF_Cu         | 0           | 0           | 0           |
| UIJ69542.1 | polysaccharide_deacetylase (plasmid) [Bacillus_cereus]                                  | CPTF_Fe         | 0           | 0           | 0           |
| UIJ69542.1 | polysaccharide_deacetylase (plasmid) [Bacillus_cereus]                                  | CPTF_Mn         | 0           | 0           | 0           |
| UIJ69542.1 | polysaccharide_deacetylase (plasmid) [Bacillus_cereus]                                  | CPTF_Ni         | 0           | 0           | 0           |
| UIJ69542.1 | polysaccharide_deacetylase (plasmid) [Bacillus_cereus]                                  | CPTF_U          | 0           | 0           | 0           |
| UIJ69542.1 | polysaccharide_deacetylase (plasmid) [Bacillus_cereus]                                  | CPTF_metals_mix | 84777.56667 | 129920.9285 | 153.2491833 |
| UIJ69542.1 | polysaccharide_deacetylase (plasmid) [Bacillus_cereus]                                  | CPTF_zcontrol   | 0           | 0           | 0           |
| UIJ69547.1 | YkvS_family_protein (plasmid) [Bacillus_cereus]                                         | CPTF_AI         | 0           | 0           | 0           |
| UIJ69547.1 | YkvS_family_protein (plasmid) [Bacillus_cereus]                                         | CPTF_Cd         | 0           | 0           | 0           |

|            |                                                                                    |                 |             |             |             |
|------------|------------------------------------------------------------------------------------|-----------------|-------------|-------------|-------------|
| UIJ69547.1 | YkvS_family_protein_(plasmid)_[Bacillus_cereus]                                    | CPTF_Co         | 0           | 0           | 0           |
| UIJ69547.1 | YkvS_family_protein_(plasmid)_[Bacillus_cereus]                                    | CPTF_Cu         | 0           | 0           | 0           |
| UIJ69547.1 | YkvS_family_protein_(plasmid)_[Bacillus_cereus]                                    | CPTF_Fe         | 0           | 0           | 0           |
| UIJ69547.1 | YkvS_family_protein_(plasmid)_[Bacillus_cereus]                                    | CPTF_Mn         | 0           | 0           | 0           |
| UIJ69547.1 | YkvS_family_protein_(plasmid)_[Bacillus_cereus]                                    | CPTF_Ni         | 0           | 0           | 0           |
| UIJ69547.1 | YkvS_family_protein_(plasmid)_[Bacillus_cereus]                                    | CPTF_U          | 0           | 0           | 0           |
| UIJ69547.1 | YkvS_family_protein_(plasmid)_[Bacillus_cereus]                                    | CPTF_metals_mix | 104194.3333 | 180469.8792 | 173.2050808 |
| UIJ69547.1 | YkvS_family_protein_(plasmid)_[Bacillus_cereus]                                    | CPTF_zcontrol   | 0           | 0           | 0           |
| UIJ69570.1 | metalloregulator_ArsR/SmtB_family_transcription_factor_(plasmid)_[Bacillus_cereus] | CPTF_Al         | 335248      | 40363.07755 | 12.03976684 |
| UIJ69570.1 | metalloregulator_ArsR/SmtB_family_transcription_factor_(plasmid)_[Bacillus_cereus] | CPTF_Cd         | 344331      | 44928.14624 | 13.04795277 |
| UIJ69570.1 | metalloregulator_ArsR/SmtB_family_transcription_factor_(plasmid)_[Bacillus_cereus] | CPTF_Co         | 302149.6667 | 35273.68199 | 11.67424157 |
| UIJ69570.1 | metalloregulator_ArsR/SmtB_family_transcription_factor_(plasmid)_[Bacillus_cereus] | CPTF_Cu         | 304587.6667 | 13952.08047 | 4.580645244 |
| UIJ69570.1 | metalloregulator_ArsR/SmtB_family_transcription_factor_(plasmid)_[Bacillus_cereus] | CPTF_Fe         | 319926.3333 | 33418.13571 | 10.44557207 |
| UIJ69570.1 | metalloregulator_ArsR/SmtB_family_transcription_factor_(plasmid)_[Bacillus_cereus] | CPTF_Mn         | 365850      | 11128.16512 | 3.041728884 |
| UIJ69570.1 | metalloregulator_ArsR/SmtB_family_transcription_factor_(plasmid)_[Bacillus_cereus] | CPTF_Ni         | 284671      | 19110.98572 | 6.71335883  |
| UIJ69570.1 | metalloregulator_ArsR/SmtB_family_transcription_factor_(plasmid)_[Bacillus_cereus] | CPTF_U          | 273851.3333 | 56770.0056  | 20.73022794 |
| UIJ69570.1 | metalloregulator_ArsR/SmtB_family_transcription_factor_(plasmid)_[Bacillus_cereus] | CPTF_metals_mix | 282345.6667 | 45880.43602 | 16.24973975 |
| UIJ69570.1 | metalloregulator_ArsR/SmtB_family_transcription_factor_(plasmid)_[Bacillus_cereus] | CPTF_zcontrol   | 301865      | 29033.16006 | 9.617928564 |
| UIJ69571.1 | HU_family_DNA-binding_protein_(plasmid)_[Bacillus_cereus]                          | CPTF_Al         | 124079.6667 | 214912.2869 | 173.2050808 |
| UIJ69571.1 | HU_family_DNA-binding_protein_(plasmid)_[Bacillus_cereus]                          | CPTF_Cd         | 174296.2667 | 230908.9611 | 132.4807269 |
| UIJ69571.1 | HU_family_DNA-binding_protein_(plasmid)_[Bacillus_cereus]                          | CPTF_Co         | 32929.73333 | 30219.32353 | 91.76911099 |
| UIJ69571.1 | HU_family_DNA-binding_protein_(plasmid)_[Bacillus_cereus]                          | CPTF_Cu         | 54375.7     | 52521.80097 | 96.59057441 |
| UIJ69571.1 | HU_family_DNA-binding_protein_(plasmid)_[Bacillus_cereus]                          | CPTF_Fe         | 47157.36667 | 16242.33139 | 34.44282949 |
| UIJ69571.1 | HU_family_DNA-binding_protein_(plasmid)_[Bacillus_cereus]                          | CPTF_Mn         | 227055.3333 | 393271.3735 | 173.2050808 |
| UIJ69571.1 | HU_family_DNA-binding_protein_(plasmid)_[Bacillus_cereus]                          | CPTF_Ni         | 30354.43333 | 52575.42077 | 173.2050808 |
| UIJ69571.1 | HU_family_DNA-binding_protein_(plasmid)_[Bacillus_cereus]                          | CPTF_U          | 21905.63333 | 37941.66991 | 173.2050808 |
| UIJ69571.1 | HU_family_DNA-binding_protein_(plasmid)_[Bacillus_cereus]                          | CPTF_metals_mix | 3619400.933 | 124211.5687 | 3.431826731 |
| UIJ69571.1 | HU_family_DNA-binding_protein_(plasmid)_[Bacillus_cereus]                          | CPTF_zcontrol   | 129908      | 225007.2563 | 173.2050808 |
| UIJ69575.1 | CalY_family_protein_(plasmid)_[Bacillus_cereus]                                    | CPTF_Al         | 6040362.133 | 764380.5785 | 12.65454888 |
| UIJ69575.1 | CalY_family_protein_(plasmid)_[Bacillus_cereus]                                    | CPTF_Cd         | 6643432.867 | 229307.7916 | 3.451646103 |
| UIJ69575.1 | CalY_family_protein_(plasmid)_[Bacillus_cereus]                                    | CPTF_Co         | 6347293.767 | 772721.7005 | 12.17403399 |
| UIJ69575.1 | CalY_family_protein_(plasmid)_[Bacillus_cereus]                                    | CPTF_Cu         | 1365406.033 | 81360.97812 | 5.958738729 |
| UIJ69575.1 | CalY_family_protein_(plasmid)_[Bacillus_cereus]                                    | CPTF_Fe         | 4466107.867 | 1998277.106 | 44.74314472 |
| UIJ69575.1 | CalY_family_protein_(plasmid)_[Bacillus_cereus]                                    | CPTF_Mn         | 5789519.7   | 355711.9021 | 6.144065839 |
| UIJ69575.1 | CalY_family_protein_(plasmid)_[Bacillus_cereus]                                    | CPTF_Ni         | 3824641.933 | 1146540.723 | 29.97772715 |
| UIJ69575.1 | CalY_family_protein_(plasmid)_[Bacillus_cereus]                                    | CPTF_U          | 4813761.367 | 2246650.349 | 46.67141094 |
| UIJ69575.1 | CalY_family_protein_(plasmid)_[Bacillus_cereus]                                    | CPTF_metals_mix | 447628.3333 | 110456.4997 | 24.67594016 |
| UIJ69575.1 | CalY_family_protein_(plasmid)_[Bacillus_cereus]                                    | CPTF_zcontrol   | 6738669.067 | 214864.3459 | 3.188527939 |
| UIJ69581.1 | MerR_family_transcriptional_regulator_(plasmid)_[Bacillus_cereus]                  | CPTF_Al         | 100072.5333 | 7172.162816 | 7.166964377 |
| UIJ69581.1 | MerR_family_transcriptional_regulator_(plasmid)_[Bacillus_cereus]                  | CPTF_Cd         | 84575.03333 | 2253.955173 | 2.665036104 |
| UIJ69581.1 | MerR_family_transcriptional_regulator_(plasmid)_[Bacillus_cereus]                  | CPTF_Co         | 106491.7667 | 12440.52238 | 11.6821448  |
| UIJ69581.1 | MerR_family_transcriptional_regulator_(plasmid)_[Bacillus_cereus]                  | CPTF_Cu         | 109139.3    | 11101.44746 | 10.17181479 |
| UIJ69581.1 | MerR_family_transcriptional_regulator_(plasmid)_[Bacillus_cereus]                  | CPTF_Fe         | 64388.66667 | 12685.3907  | 19.70127874 |
| UIJ69581.1 | MerR_family_transcriptional_regulator_(plasmid)_[Bacillus_cereus]                  | CPTF_Mn         | 57297.03333 | 49732.63597 | 86.79792491 |
| UIJ69581.1 | MerR_family_transcriptional_regulator_(plasmid)_[Bacillus_cereus]                  | CPTF_Ni         | 110273.3333 | 4985.834166 | 4.521341666 |
| UIJ69581.1 | MerR_family_transcriptional_regulator_(plasmid)_[Bacillus_cereus]                  | CPTF_U          | 60227.93333 | 52269.17611 | 86.78560465 |
| UIJ69581.1 | MerR_family_transcriptional_regulator_(plasmid)_[Bacillus_cereus]                  | CPTF_metals_mix | 99749.46667 | 5171.145546 | 5.184133528 |
| UIJ69581.1 | MerR_family_transcriptional_regulator_(plasmid)_[Bacillus_cereus]                  | CPTF_zcontrol   | 83848.36667 | 5339.320033 | 6.367828313 |
| UIJ69582.1 | cell_division_protein_FtsZ_(plasmid)_[Bacillus_cereus]                             | CPTF_Al         | 1033837.033 | 283493.5063 | 27.4214888  |
| UIJ69582.1 | cell_division_protein_FtsZ_(plasmid)_[Bacillus_cereus]                             | CPTF_Cd         | 118293.933  | 201555.4996 | 17.03861002 |
| UIJ69582.1 | cell_division_protein_FtsZ_(plasmid)_[Bacillus_cereus]                             | CPTF_Co         | 987613.6333 | 117437.9024 | 11.89107748 |
| UIJ69582.1 | cell_division_protein_FtsZ_(plasmid)_[Bacillus_cereus]                             | CPTF_Cu         | 795407.6    | 106105.5513 | 13.33977087 |
| UIJ69582.1 | cell_division_protein_FtsZ_(plasmid)_[Bacillus_cereus]                             | CPTF_Fe         | 1189224.7   | 62790.58529 | 5.279959732 |
| UIJ69582.1 | cell_division_protein_FtsZ_(plasmid)_[Bacillus_cereus]                             | CPTF_Mn         | 1211796.6   | 335255.6618 | 27.6660012  |
| UIJ69582.1 | cell_division_protein_FtsZ_(plasmid)_[Bacillus_cereus]                             | CPTF_Ni         | 1197878.733 | 351342.8978 | 29.33042286 |
| UIJ69582.1 | cell_division_protein_FtsZ_(plasmid)_[Bacillus_cereus]                             | CPTF_U          | 957421.0667 | 546308.1496 | 57.0603853  |
| UIJ69582.1 | cell_division_protein_FtsZ_(plasmid)_[Bacillus_cereus]                             | CPTF_metals_mix | 916315      | 304006.1873 | 33.17703926 |
| UIJ69582.1 | cell_division_protein_FtsZ_(plasmid)_[Bacillus_cereus]                             | CPTF_zcontrol   | 1410597.533 | 249285.9634 | 17.67236632 |
| UIJ69620.1 | urease_subunit_alpha_(plasmid)_[Bacillus_cereus]                                   | CPTF_Al         | 0           | 0           | 0           |
| UIJ69620.1 | urease_subunit_alpha_(plasmid)_[Bacillus_cereus]                                   | CPTF_Cd         | 0           | 0           | 0           |
| UIJ69620.1 | urease_subunit_alpha_(plasmid)_[Bacillus_cereus]                                   | CPTF_Co         | 19857.7     | 34394.54532 | 173.2050808 |

|            |                                                              |                 |             |             |             |  |
|------------|--------------------------------------------------------------|-----------------|-------------|-------------|-------------|--|
| UIJ69620.1 | urease_subunit_alpha_(plasmid)_[Bacillus_cereus]             | CPTF_Cu         | 63879.3     | 58115.16425 | 90.97652017 |  |
| UIJ69620.1 | urease_subunit_alpha_(plasmid)_[Bacillus_cereus]             | CPTF_Fe         | 0           | 0           | 0           |  |
| UIJ69620.1 | urease_subunit_alpha_(plasmid)_[Bacillus_cereus]             | CPTF_Mn         | 0           | 0           | 0           |  |
| UIJ69620.1 | urease_subunit_alpha_(plasmid)_[Bacillus_cereus]             | CPTF_Ni         | 0           | 0           | 0           |  |
| UIJ69620.1 | urease_subunit_alpha_(plasmid)_[Bacillus_cereus]             | CPTF_U          | 0           | 0           | 0           |  |
| UIJ69620.1 | urease_subunit_alpha_(plasmid)_[Bacillus_cereus]             | CPTF_metals_mix | 0           | 0           | 0           |  |
| UIJ69620.1 | urease_subunit_alpha_(plasmid)_[Bacillus_cereus]             | CPTF_zcontrol   | 0           | 0           | 0           |  |
| UIJ69621.1 | urease_accessory_protein_UreE_(plasmid)_[Bacillus_cereus]    | CPTF_Al         | 101090.8    | 32306.89771 | 31.95829661 |  |
| UIJ69621.1 | urease_accessory_protein_UreE_(plasmid)_[Bacillus_cereus]    | CPTF_Cd         | 85133       | 11819.62126 | 13.88371285 |  |
| UIJ69621.1 | urease_accessory_protein_UreE_(plasmid)_[Bacillus_cereus]    | CPTF_Co         | 88020.4     | 28242.22912 | 32.08600406 |  |
| UIJ69621.1 | urease_accessory_protein_UreE_(plasmid)_[Bacillus_cereus]    | CPTF_Cu         | 74959.33333 | 68332.0798  | 91.15886809 |  |
| UIJ69621.1 | urease_accessory_protein_UreE_(plasmid)_[Bacillus_cereus]    | CPTF_Fe         | 64443.1     | 20152.13203 | 31.27120208 |  |
| UIJ69621.1 | urease_accessory_protein_UreE_(plasmid)_[Bacillus_cereus]    | CPTF_Mn         | 14195.23333 | 24586.86536 | 173.2050808 |  |
| UIJ69621.1 | urease_accessory_protein_UreE_(plasmid)_[Bacillus_cereus]    | CPTF_Ni         | 52478.2     | 45969.52357 | 87.59737104 |  |
| UIJ69621.1 | urease_accessory_protein_UreE_(plasmid)_[Bacillus_cereus]    | CPTF_U          | 79147.83333 | 11006.98584 | 13.90686944 |  |
| UIJ69621.1 | urease_accessory_protein_UreE_(plasmid)_[Bacillus_cereus]    | CPTF_metals_mix | 22477.13333 | 38931.53694 | 173.2050808 |  |
| UIJ69621.1 | urease_accessory_protein_UreE_(plasmid)_[Bacillus_cereus]    | CPTF_zcontrol   | 45876.16667 | 44501.40752 | 97.00332603 |  |
| UIJ69623.1 | urease_accessory_protein_UreG_(plasmid)_[Bacillus_cereus]    | CPTF_Al         | 311924.5    | 61922.47306 | 19.85175036 |  |
| UIJ69623.1 | urease_accessory_protein_UreG_(plasmid)_[Bacillus_cereus]    | CPTF_Cd         | 389053      | 22322.98898 | 5.737775825 |  |
| UIJ69623.1 | urease_accessory_protein_UreG_(plasmid)_[Bacillus_cereus]    | CPTF_Co         | 319414.8    | 27241.08672 | 8.528435978 |  |
| UIJ69623.1 | urease_accessory_protein_UreG_(plasmid)_[Bacillus_cereus]    | CPTF_Cu         | 267015.2333 | 53350.08533 | 19.98016542 |  |
| UIJ69623.1 | urease_accessory_protein_UreG_(plasmid)_[Bacillus_cereus]    | CPTF_Fe         | 286758.3333 | 40288.6772  | 14.04969708 |  |
| UIJ69623.1 | urease_accessory_protein_UreG_(plasmid)_[Bacillus_cereus]    | CPTF_Mn         | 295866.3333 | 31414.36761 | 10.61775676 |  |
| UIJ69623.1 | urease_accessory_protein_UreG_(plasmid)_[Bacillus_cereus]    | CPTF_Ni         | 215506.9    | 36439.82016 | 16.90888791 |  |
| UIJ69623.1 | urease_accessory_protein_UreG_(plasmid)_[Bacillus_cereus]    | CPTF_U          | 271427.0333 | 112723.1992 | 41.52983503 |  |
| UIJ69623.1 | urease_accessory_protein_UreG_(plasmid)_[Bacillus_cereus]    | CPTF_metals_mix | 333344.7    | 42427.45352 | 12.72780204 |  |
| UIJ69623.1 | urease_accessory_protein_UreG_(plasmid)_[Bacillus_cereus]    | CPTF_zcontrol   | 258688.5    | 92711.76949 | 35.83915384 |  |
| UIJ69677.1 | peptidylprolyl_isomerase_(plasmid)_[Bacillus_cereus]         | CPTF_Al         | 1052870.667 | 346776.9746 | 32.93633165 |  |
| UIJ69677.1 | peptidylprolyl_isomerase_(plasmid)_[Bacillus_cereus]         | CPTF_Cd         | 1171131.367 | 345608.4344 | 29.51064622 |  |
| UIJ69677.1 | peptidylprolyl_isomerase_(plasmid)_[Bacillus_cereus]         | CPTF_Co         | 1149227.467 | 362629.3475 | 31.55418383 |  |
| UIJ69677.1 | peptidylprolyl_isomerase_(plasmid)_[Bacillus_cereus]         | CPTF_Cu         | 1157026.3   | 54889.5982  | 4.744023382 |  |
| UIJ69677.1 | peptidylprolyl_isomerase_(plasmid)_[Bacillus_cereus]         | CPTF_Fe         | 1276836.4   | 231757.535  | 18.15091855 |  |
| UIJ69677.1 | peptidylprolyl_isomerase_(plasmid)_[Bacillus_cereus]         | CPTF_Mn         | 825127.9667 | 514028.7121 | 62.29684762 |  |
| UIJ69677.1 | peptidylprolyl_isomerase_(plasmid)_[Bacillus_cereus]         | CPTF_Ni         | 1149822.333 | 222774.6805 | 19.3747046  |  |
| UIJ69677.1 | peptidylprolyl_isomerase_(plasmid)_[Bacillus_cereus]         | CPTF_U          | 715347      | 67991.44794 | 9.504680657 |  |
| UIJ69677.1 | peptidylprolyl_isomerase_(plasmid)_[Bacillus_cereus]         | CPTF_metals_mix | 2163717.1   | 230367.0904 | 10.64682118 |  |
| UIJ69677.1 | peptidylprolyl_isomerase_(plasmid)_[Bacillus_cereus]         | CPTF_zcontrol   | 1312134     | 582596.2028 | 44.40066356 |  |
| UIJ69708.1 | hypothetical_protein_LW858_29515_(plasmid)_[Bacillus_cereus] | CPTF_Al         | 0           | 0           | 0           |  |
| UIJ69708.1 | hypothetical_protein_LW858_29515_(plasmid)_[Bacillus_cereus] | CPTF_Cd         | 0           | 0           | 0           |  |
| UIJ69708.1 | hypothetical_protein_LW858_29515_(plasmid)_[Bacillus_cereus] | CPTF_Co         | 11467       | 19861.42661 | 173.2050808 |  |
| UIJ69708.1 | hypothetical_protein_LW858_29515_(plasmid)_[Bacillus_cereus] | CPTF_Cu         | 77609       | 134422.7311 | 173.2050808 |  |
| UIJ69708.1 | hypothetical_protein_LW858_29515_(plasmid)_[Bacillus_cereus] | CPTF_Fe         | 0           | 0           | 0           |  |
| UIJ69708.1 | hypothetical_protein_LW858_29515_(plasmid)_[Bacillus_cereus] | CPTF_Mn         | 0           | 0           | 0           |  |
| UIJ69708.1 | hypothetical_protein_LW858_29515_(plasmid)_[Bacillus_cereus] | CPTF_Ni         | 0           | 0           | 0           |  |
| UIJ69708.1 | hypothetical_protein_LW858_29515_(plasmid)_[Bacillus_cereus] | CPTF_U          | 0           | 0           | 0           |  |
| UIJ69708.1 | hypothetical_protein_LW858_29515_(plasmid)_[Bacillus_cereus] | CPTF_metals_mix | 67300.86667 | 59394.1931  | 88.25175075 |  |
| UIJ69708.1 | hypothetical_protein_LW858_29515_(plasmid)_[Bacillus_cereus] | CPTF_zcontrol   | 0           | 0           | 0           |  |
| UIJ69728.1 | hypothetical_protein_LW858_29720_(plasmid)_[Bacillus_cereus] | CPTF_Al         | 94618.66667 | 82683.59792 | 87.38613725 |  |
| UIJ69728.1 | hypothetical_protein_LW858_29720_(plasmid)_[Bacillus_cereus] | CPTF_Cd         | 48891.66667 | 84682.85073 | 173.2050808 |  |
| UIJ69728.1 | hypothetical_protein_LW858_29720_(plasmid)_[Bacillus_cereus] | CPTF_Co         | 119009      | 106170.9711 | 89.21255627 |  |
| UIJ69728.1 | hypothetical_protein_LW858_29720_(plasmid)_[Bacillus_cereus] | CPTF_Cu         | 108630      | 94771.41196 | 87.2423934  |  |
| UIJ69728.1 | hypothetical_protein_LW858_29720_(plasmid)_[Bacillus_cereus] | CPTF_Fe         | 125616.2    | 71023.76584 | 56.54029165 |  |
| UIJ69728.1 | hypothetical_protein_LW858_29720_(plasmid)_[Bacillus_cereus] | CPTF_Mn         | 78235.6     | 90090.54452 | 115.1528774 |  |
| UIJ69728.1 | hypothetical_protein_LW858_29720_(plasmid)_[Bacillus_cereus] | CPTF_Ni         | 95270       | 85018.01482 | 89.23902049 |  |
| UIJ69728.1 | hypothetical_protein_LW858_29720_(plasmid)_[Bacillus_cereus] | CPTF_U          | 79627.33333 | 69427.44818 | 87.19047251 |  |
| UIJ69728.1 | hypothetical_protein_LW858_29720_(plasmid)_[Bacillus_cereus] | CPTF_metals_mix | 281547.3333 | 45916.0992  | 16.30848307 |  |
| UIJ69728.1 | hypothetical_protein_LW858_29720_(plasmid)_[Bacillus_cereus] | CPTF_zcontrol   | 56049.56667 | 53879.5629  | 96.12842008 |  |
| UIJ69785.1 | hypothetical_protein_LW858_30150_(plasmid)_[Bacillus_cereus] | CPTF_Al         | 0           | 0           | 0           |  |
| UIJ69785.1 | hypothetical_protein_LW858_30150_(plasmid)_[Bacillus_cereus] | CPTF_Cd         | 0           | 0           | 0           |  |
| UIJ69785.1 | hypothetical_protein_LW858_30150_(plasmid)_[Bacillus_cereus] | CPTF_Co         | 0           | 0           | 0           |  |
| UIJ69785.1 | hypothetical_protein_LW858_30150_(plasmid)_[Bacillus_cereus] | CPTF_Cu         | 0           | 0           | 0           |  |

|            |                                                                                              |                 |             |             |             |
|------------|----------------------------------------------------------------------------------------------|-----------------|-------------|-------------|-------------|
| UIJ69785.1 | hypothetical_protein_LW858_30150_(plasmid)_[Bacillus_cereus]                                 | CPTF_Fe         | 0           | 0           | 0           |
| UIJ69785.1 | hypothetical_protein_LW858_30150_(plasmid)_[Bacillus_cereus]                                 | CPTF_Mn         | 9589.7      | 16609.84763 | 173.2050808 |
| UIJ69785.1 | hypothetical_protein_LW858_30150_(plasmid)_[Bacillus_cereus]                                 | CPTF_Ni         | 10854.33333 | 18800.25682 | 173.2050808 |
| UIJ69785.1 | hypothetical_protein_LW858_30150_(plasmid)_[Bacillus_cereus]                                 | CPTF_U          | 14270.82669 | 24716.82669 | 173.2050808 |
| UIJ69785.1 | hypothetical_protein_LW858_30150_(plasmid)_[Bacillus_cereus]                                 | CPTF_metals_mix | 67021.46667 | 37906.91008 | 56.55935623 |
| UIJ69785.1 | hypothetical_protein_LW858_30150_(plasmid)_[Bacillus_cereus]                                 | CPTF_zcontrol   | 9686.8      | 16778.02976 | 173.2050808 |
| UIJ69803.1 | metalloregulator_ArsR/SmtB_family_transcription_factor_(plasmid)_[Bacillus_cereus]           | CPTF_Al         | 84393       | 73312.20287 | 86.87000446 |
| UIJ69803.1 | metalloregulator_ArsR/SmtB_family_transcription_factor_(plasmid)_[Bacillus_cereus]           | CPTF_Cd         | 124667.6667 | 17028.222   | 13.65889204 |
| UIJ69803.1 | metalloregulator_ArsR/SmtB_family_transcription_factor_(plasmid)_[Bacillus_cereus]           | CPTF_Co         | 56360.43333 | 65514.07806 | 116.2412604 |
| UIJ69803.1 | metalloregulator_ArsR/SmtB_family_transcription_factor_(plasmid)_[Bacillus_cereus]           | CPTF_Cu         | 0           | 0           | 0           |
| UIJ69803.1 | metalloregulator_ArsR/SmtB_family_transcription_factor_(plasmid)_[Bacillus_cereus]           | CPTF_Fe         | 45251.66667 | 78378.18579 | 173.2050808 |
| UIJ69803.1 | metalloregulator_ArsR/SmtB_family_transcription_factor_(plasmid)_[Bacillus_cereus]           | CPTF_Mn         | 68005.33333 | 117788.6925 | 173.2050808 |
| UIJ69803.1 | metalloregulator_ArsR/SmtB_family_transcription_factor_(plasmid)_[Bacillus_cereus]           | CPTF_Ni         | 0           | 0           | 0           |
| UIJ69803.1 | metalloregulator_ArsR/SmtB_family_transcription_factor_(plasmid)_[Bacillus_cereus]           | CPTF_U          | 0           | 0           | 0           |
| UIJ69803.1 | metalloregulator_ArsR/SmtB_family_transcription_factor_(plasmid)_[Bacillus_cereus]           | CPTF_metals_mix | 134616.6667 | 23967.67136 | 17.8043863  |
| UIJ69803.1 | metalloregulator_ArsR/SmtB_family_transcription_factor_(plasmid)_[Bacillus_cereus]           | CPTF_zcontrol   | 34911.66667 | 60468.78044 | 173.2050808 |
| UIJ69838.1 | Rpn_family_recombination-promoting_nuclease/putative_transposase_(plasmid)_[Bacillus_cereus] | CPTF_Al         | 148333.333  | 180092.5688 | 12.14107205 |
| UIJ69838.1 | Rpn_family_recombination-promoting_nuclease/putative_transposase_(plasmid)_[Bacillus_cereus] | CPTF_Cd         | 1890176.333 | 235613.8104 | 12.4651762  |
| UIJ69838.1 | Rpn_family_recombination-promoting_nuclease/putative_transposase_(plasmid)_[Bacillus_cereus] | CPTF_Co         | 1654486.333 | 300993.4394 | 18.19256124 |
| UIJ69838.1 | Rpn_family_recombination-promoting_nuclease/putative_transposase_(plasmid)_[Bacillus_cereus] | CPTF_Cu         | 1597687.333 | 146544.687  | 9.172300732 |
| UIJ69838.1 | Rpn_family_recombination-promoting_nuclease/putative_transposase_(plasmid)_[Bacillus_cereus] | CPTF_Fe         | 1702747     | 140945.1479 | 8.277515562 |
| UIJ69838.1 | Rpn_family_recombination-promoting_nuclease/putative_transposase_(plasmid)_[Bacillus_cereus] | CPTF_Mn         | 1684030.667 | 192365.2225 | 11.42290496 |
| UIJ69838.1 | Rpn_family_recombination-promoting_nuclease/putative_transposase_(plasmid)_[Bacillus_cereus] | CPTF_Ni         | 1616666.667 | 63508.52961 | 3.928362656 |
| UIJ69838.1 | Rpn_family_recombination-promoting_nuclease/putative_transposase_(plasmid)_[Bacillus_cereus] | CPTF_U          | 1722349.333 | 15686.87672 | 0.910783685 |
| UIJ69838.1 | Rpn_family_recombination-promoting_nuclease/putative_transposase_(plasmid)_[Bacillus_cereus] | CPTF_metals_mix | 2395107.333 | 155157.5249 | 6.478103205 |
| UIJ69838.1 | Rpn_family_recombination-promoting_nuclease/putative_transposase_(plasmid)_[Bacillus_cereus] | CPTF_zcontrol   | 1616666.667 | 55075.70547 | 3.406744668 |
| UIJ69840.1 | hypothetical_protein_LW858_31855_(plasmid)_[Bacillus_cereus]                                 | CPTF_Al         | 41774.7     | 39039.93027 | 93.45352635 |
| UIJ69840.1 | hypothetical_protein_LW858_31855_(plasmid)_[Bacillus_cereus]                                 | CPTF_Cd         | 0           | 0           | 0           |
| UIJ69840.1 | hypothetical_protein_LW858_31855_(plasmid)_[Bacillus_cereus]                                 | CPTF_Co         | 25005.36667 | 22547.2057  | 90.16946641 |
| UIJ69840.1 | hypothetical_protein_LW858_31855_(plasmid)_[Bacillus_cereus]                                 | CPTF_Cu         | 19134.3     | 33141.57977 | 173.2050808 |
| UIJ69840.1 | hypothetical_protein_LW858_31855_(plasmid)_[Bacillus_cereus]                                 | CPTF_Fe         | 0           | 0           | 0           |
| UIJ69840.1 | hypothetical_protein_LW858_31855_(plasmid)_[Bacillus_cereus]                                 | CPTF_Mn         | 0           | 0           | 0           |
| UIJ69840.1 | hypothetical_protein_LW858_31855_(plasmid)_[Bacillus_cereus]                                 | CPTF_Ni         | 0           | 0           | 0           |
| UIJ69840.1 | hypothetical_protein_LW858_31855_(plasmid)_[Bacillus_cereus]                                 | CPTF_U          | 0           | 0           | 0           |
| UIJ69840.1 | hypothetical_protein_LW858_31855_(plasmid)_[Bacillus_cereus]                                 | CPTF_metals_mix | 44885       | 21766.28431 | 48.4934484  |
| UIJ69840.1 | hypothetical_protein_LW858_31855_(plasmid)_[Bacillus_cereus]                                 | CPTF_zcontrol   | 0           | 0           | 0           |
| UIJ69842.1 | SWIM_zinc_finger_family_protein_(plasmid)_[Bacillus_cereus]                                  | CPTF_Al         | 208329      | 33538.01132 | 16.09858028 |
| UIJ69842.1 | SWIM_zinc_finger_family_protein_(plasmid)_[Bacillus_cereus]                                  | CPTF_Cd         | 101472.2    | 73304.25756 | 72.24072954 |
| UIJ69842.1 | SWIM_zinc_finger_family_protein_(plasmid)_[Bacillus_cereus]                                  | CPTF_Co         | 178832.3333 | 36438.8315  | 20.37597498 |
| UIJ69842.1 | SWIM_zinc_finger_family_protein_(plasmid)_[Bacillus_cereus]                                  | CPTF_Cu         | 128347.9    | 83223.96987 | 64.84248661 |
| UIJ69842.1 | SWIM_zinc_finger_family_protein_(plasmid)_[Bacillus_cereus]                                  | CPTF_Fe         | 224294      | 5423.471859 | 2.418019144 |
| UIJ69842.1 | SWIM_zinc_finger_family_protein_(plasmid)_[Bacillus_cereus]                                  | CPTF_Mn         | 238128.1333 | 159878.0291 | 67.13949622 |
| UIJ69842.1 | SWIM_zinc_finger_family_protein_(plasmid)_[Bacillus_cereus]                                  | CPTF_Ni         | 242898      | 72068.69898 | 29.67035504 |
| UIJ69842.1 | SWIM_zinc_finger_family_protein_(plasmid)_[Bacillus_cereus]                                  | CPTF_U          | 201482.3333 | 176704.5752 | 87.70226764 |
| UIJ69842.1 | SWIM_zinc_finger_family_protein_(plasmid)_[Bacillus_cereus]                                  | CPTF_metals_mix | 47570       | 46621.19143 | 98.00544761 |
| UIJ69842.1 | SWIM_zinc_finger_family_protein_(plasmid)_[Bacillus_cereus]                                  | CPTF_zcontrol   | 248136.3333 | 92706.58471 | 37.3611488  |
| UIJ69851.1 | Rpn_family_recombination-promoting_nuclease/putative_transposase_(plasmid)_[Bacillus_cereus] | CPTF_Al         | 423054.6333 | 213669.8249 | 50.50643772 |
| UIJ69851.1 | Rpn_family_recombination-promoting_nuclease/putative_transposase_(plasmid)_[Bacillus_cereus] | CPTF_Cd         | 205492.0667 | 111413.7094 | 54.21801005 |
| UIJ69851.1 | Rpn_family_recombination-promoting_nuclease/putative_transposase_(plasmid)_[Bacillus_cereus] | CPTF_Co         | 239962.9333 | 63660.92762 | 26.52948384 |
| UIJ69851.1 | Rpn_family_recombination-promoting_nuclease/putative_transposase_(plasmid)_[Bacillus_cereus] | CPTF_Cu         | 267109.6    | 4339.412665 | 1.62458132  |
| UIJ69851.1 | Rpn_family_recombination-promoting_nuclease/putative_transposase_(plasmid)_[Bacillus_cereus] | CPTF_Fe         | 401439.6333 | 135176.8247 | 33.67301418 |
| UIJ69851.1 | Rpn_family_recombination-promoting_nuclease/putative_transposase_(plasmid)_[Bacillus_cereus] | CPTF_Mn         | 697489.8    | 182027.9477 | 26.09757845 |
| UIJ69851.1 | Rpn_family_recombination-promoting_nuclease/putative_transposase_(plasmid)_[Bacillus_cereus] | CPTF_Ni         | 216427.4667 | 149164.3546 | 68.92117572 |
| UIJ69851.1 | Rpn_family_recombination-promoting_nuclease/putative_transposase_(plasmid)_[Bacillus_cereus] | CPTF_U          | 407601.1667 | 320920.8978 | 78.73404789 |
| UIJ69851.1 | Rpn_family_recombination-promoting_nuclease/putative_transposase_(plasmid)_[Bacillus_cereus] | CPTF_metals_mix | 1260977.233 | 76929.16821 | 6.100757902 |
| UIJ69851.1 | Rpn_family_recombination-promoting_nuclease/putative_transposase_(plasmid)_[Bacillus_cereus] | CPTF_zcontrol   | 575503.1667 | 244035.2482 | 42.40380632 |
| UIJ69857.1 | Rpn_family_recombination-promoting_nuclease/putative_transposase_(plasmid)_[Bacillus_cereus] | CPTF_Al         | 911610.2667 | 283999.6377 | 31.15362431 |
| UIJ69857.1 | Rpn_family_recombination-promoting_nuclease/putative_transposase_(plasmid)_[Bacillus_cereus] | CPTF_Cd         | 964610.0667 | 130878.7443 | 13.5680467  |
| UIJ69857.1 | Rpn_family_recombination-promoting_nuclease/putative_transposase_(plasmid)_[Bacillus_cereus] | CPTF_Co         | 981751.8333 | 94664.89307 | 9.642446273 |
| UIJ69857.1 | Rpn_family_recombination-promoting_nuclease/putative_transposase_(plasmid)_[Bacillus_cereus] | CPTF_Cu         | 930537.4    | 104060.1286 | 11.18279916 |
| UIJ69857.1 | Rpn_family_recombination-promoting_nuclease/putative_transposase_(plasmid)_[Bacillus_cereus] | CPTF_Fe         | 920344.7667 | 101349.7338 | 11.01214865 |

|            |                                                                                              |                 |             |             |             |
|------------|----------------------------------------------------------------------------------------------|-----------------|-------------|-------------|-------------|
| UIJ69857.1 | Rpn_family_recombination-promoting_nuclease/putative_transposase_(plasmid)_[Bacillus_cereus] | CPTF_Mn         | 1010494.2   | 76179.90287 | 7.538875816 |
| UIJ69857.1 | Rpn_family_recombination-promoting_nuclease/putative_transposase_(plasmid)_[Bacillus_cereus] | CPTF_Ni         | 1000324.767 | 69530.00926 | 6.950743556 |
| UIJ69857.1 | Rpn_family_recombination-promoting_nuclease/putative_transposase_(plasmid)_[Bacillus_cereus] | CPTF_U          | 882351.3333 | 273978.6395 | 31.05096905 |
| UIJ69857.1 | Rpn_family_recombination-promoting_nuclease/putative_transposase_(plasmid)_[Bacillus_cereus] | CPTF_metals_mix | 1049192.667 | 182081.6209 | 17.35445404 |
| UIJ69857.1 | Rpn_family_recombination-promoting_nuclease/putative_transposase_(plasmid)_[Bacillus_cereus] | CPTF_zcontrol   | 994652.7667 | 25837.38217 | 2.597628342 |
| UIJ69862.1 | hypothetical_protein_LW858_31475_(plasmid)_[Bacillus_cereus]                                 | CPTF_Al         | 30609.8     | 28167.15066 | 92.02004147 |
| UIJ69862.1 | hypothetical_protein_LW858_31475_(plasmid)_[Bacillus_cereus]                                 | CPTF_Cd         | 0           | 0           | 0           |
| UIJ69862.1 | hypothetical_protein_LW858_31475_(plasmid)_[Bacillus_cereus]                                 | CPTF_Co         | 39202.3     | 41990.14364 | 107.1114288 |
| UIJ69862.1 | hypothetical_protein_LW858_31475_(plasmid)_[Bacillus_cereus]                                 | CPTF_Cu         | 0           | 0           | 0           |
| UIJ69862.1 | hypothetical_protein_LW858_31475_(plasmid)_[Bacillus_cereus]                                 | CPTF_Fe         | 0           | 0           | 0           |
| UIJ69862.1 | hypothetical_protein_LW858_31475_(plasmid)_[Bacillus_cereus]                                 | CPTF_Mn         | 0           | 0           | 0           |
| UIJ69862.1 | hypothetical_protein_LW858_31475_(plasmid)_[Bacillus_cereus]                                 | CPTF_Ni         | 0           | 0           | 0           |
| UIJ69862.1 | hypothetical_protein_LW858_31475_(plasmid)_[Bacillus_cereus]                                 | CPTF_U          | 0           | 0           | 0           |
| UIJ69862.1 | hypothetical_protein_LW858_31475_(plasmid)_[Bacillus_cereus]                                 | CPTF_metals_mix | 0           | 0           | 0           |
| UIJ69862.1 | hypothetical_protein_LW858_31475_(plasmid)_[Bacillus_cereus]                                 | CPTF_zcontrol   | 0           | 0           | 0           |
| UIJ69878.1 | ParM/StbA_family_protein_(plasmid)_[Bacillus_cereus]                                         | CPTF_Al         | 732206.3333 | 330376.7672 | 45.12071969 |
| UIJ69878.1 | ParM/StbA_family_protein_(plasmid)_[Bacillus_cereus]                                         | CPTF_Cd         | 628258.4667 | 76775.6323  | 12.2203896  |
| UIJ69878.1 | ParM/StbA_family_protein_(plasmid)_[Bacillus_cereus]                                         | CPTF_Co         | 816253.0333 | 297379.5887 | 36.43227976 |
| UIJ69878.1 | ParM/StbA_family_protein_(plasmid)_[Bacillus_cereus]                                         | CPTF_Cu         | 776913.6667 | 286008.8743 | 36.81346932 |
| UIJ69878.1 | ParM/StbA_family_protein_(plasmid)_[Bacillus_cereus]                                         | CPTF_Fe         | 615298      | 251689.1083 | 40.90523751 |
| UIJ69878.1 | ParM/StbA_family_protein_(plasmid)_[Bacillus_cereus]                                         | CPTF_Mn         | 797386.3333 | 392564.875  | 49.23145264 |
| UIJ69878.1 | ParM/StbA_family_protein_(plasmid)_[Bacillus_cereus]                                         | CPTF_Ni         | 231032.1333 | 200185.7002 | 86.64842302 |
| UIJ69878.1 | ParM/StbA_family_protein_(plasmid)_[Bacillus_cereus]                                         | CPTF_U          | 275261.6333 | 154363.6728 | 56.07889152 |
| UIJ69878.1 | ParM/StbA_family_protein_(plasmid)_[Bacillus_cereus]                                         | CPTF_metals_mix | 946431      | 60227.63343 | 6.363658146 |
| UIJ69878.1 | ParM/StbA_family_protein_(plasmid)_[Bacillus_cereus]                                         | CPTF_zcontrol   | 453573      | 183688.9531 | 40.49821155 |
| UIJ69880.1 | helix-turn-helix_domain-containing_protein_(plasmid)_[Bacillus_cereus]                       | CPTF_Al         | 0           | 0           | 0           |
| UIJ69880.1 | helix-turn-helix_domain-containing_protein_(plasmid)_[Bacillus_cereus]                       | CPTF_Cd         | 0           | 0           | 0           |
| UIJ69880.1 | helix-turn-helix_domain-containing_protein_(plasmid)_[Bacillus_cereus]                       | CPTF_Co         | 0           | 0           | 0           |
| UIJ69880.1 | helix-turn-helix_domain-containing_protein_(plasmid)_[Bacillus_cereus]                       | CPTF_Cu         | 14402.43333 | 24945.74629 | 173.2050808 |
| UIJ69880.1 | helix-turn-helix_domain-containing_protein_(plasmid)_[Bacillus_cereus]                       | CPTF_Fe         | 0           | 0           | 0           |
| UIJ69880.1 | helix-turn-helix_domain-containing_protein_(plasmid)_[Bacillus_cereus]                       | CPTF_Mn         | 0           | 0           | 0           |
| UIJ69880.1 | helix-turn-helix_domain-containing_protein_(plasmid)_[Bacillus_cereus]                       | CPTF_Ni         | 12395.23333 | 21469.17391 | 173.2050808 |
| UIJ69880.1 | helix-turn-helix_domain-containing_protein_(plasmid)_[Bacillus_cereus]                       | CPTF_U          | 0           | 0           | 0           |
| UIJ69880.1 | helix-turn-helix_domain-containing_protein_(plasmid)_[Bacillus_cereus]                       | CPTF_metals_mix | 0           | 0           | 0           |
| UIJ69880.1 | helix-turn-helix_domain-containing_protein_(plasmid)_[Bacillus_cereus]                       | CPTF_zcontrol   | 0           | 0           | 0           |
| UIJ69885.1 | hypothetical_protein_LW858_31605_(plasmid)_[Bacillus_cereus]                                 | CPTF_Al         | 141452.3333 | 26818.0276  | 18.95905636 |
| UIJ69885.1 | hypothetical_protein_LW858_31605_(plasmid)_[Bacillus_cereus]                                 | CPTF_Cd         | 168601.6667 | 85163.37053 | 50.51158284 |
| UIJ69885.1 | hypothetical_protein_LW858_31605_(plasmid)_[Bacillus_cereus]                                 | CPTF_Co         | 175501.0667 | 29453.5141  | 16.78252712 |
| UIJ69885.1 | hypothetical_protein_LW858_31605_(plasmid)_[Bacillus_cereus]                                 | CPTF_Cu         | 329655      | 307730.7288 | 93.34932848 |
| UIJ69885.1 | hypothetical_protein_LW858_31605_(plasmid)_[Bacillus_cereus]                                 | CPTF_Fe         | 27217.56667 | 47142.20833 | 173.2050808 |
| UIJ69885.1 | hypothetical_protein_LW858_31605_(plasmid)_[Bacillus_cereus]                                 | CPTF_Mn         | 410988.2    | 283388.2259 | 68.95288622 |
| UIJ69885.1 | hypothetical_protein_LW858_31605_(plasmid)_[Bacillus_cereus]                                 | CPTF_Ni         | 238992      | 230734.7746 | 96.54497833 |
| UIJ69885.1 | hypothetical_protein_LW858_31605_(plasmid)_[Bacillus_cereus]                                 | CPTF_U          | 179240.3333 | 310453.3641 | 173.2050808 |
| UIJ69885.1 | hypothetical_protein_LW858_31605_(plasmid)_[Bacillus_cereus]                                 | CPTF_metals_mix | 855561.2667 | 234761.0029 | 27.43941458 |
| UIJ69885.1 | hypothetical_protein_LW858_31605_(plasmid)_[Bacillus_cereus]                                 | CPTF_zcontrol   | 82784.43333 | 41784.9727  | 50.47443223 |
| UIJ69895.1 | hypothetical_protein_LW858_31670_(plasmid)_[Bacillus_cereus]                                 | CPTF_Al         | 188882.3333 | 163723.6504 | 86.68023502 |
| UIJ69895.1 | hypothetical_protein_LW858_31670_(plasmid)_[Bacillus_cereus]                                 | CPTF_Cd         | 552626.3333 | 378128.8754 | 68.42396979 |
| UIJ69895.1 | hypothetical_protein_LW858_31670_(plasmid)_[Bacillus_cereus]                                 | CPTF_Co         | 296385.5667 | 370167.3923 | 124.8938659 |
| UIJ69895.1 | hypothetical_protein_LW858_31670_(plasmid)_[Bacillus_cereus]                                 | CPTF_Cu         | 362185.7333 | 467136.4257 | 128.9770366 |
| UIJ69895.1 | hypothetical_protein_LW858_31670_(plasmid)_[Bacillus_cereus]                                 | CPTF_Fe         | 689960.6667 | 425312.6473 | 61.64302806 |
| UIJ69895.1 | hypothetical_protein_LW858_31670_(plasmid)_[Bacillus_cereus]                                 | CPTF_Mn         | 754822.9667 | 589585.0187 | 78.10904606 |
| UIJ69895.1 | hypothetical_protein_LW858_31670_(plasmid)_[Bacillus_cereus]                                 | CPTF_Ni         | 0           | 0           | 0           |
| UIJ69895.1 | hypothetical_protein_LW858_31670_(plasmid)_[Bacillus_cereus]                                 | CPTF_U          | 248898      | 431103.9819 | 173.2050808 |
| UIJ69895.1 | hypothetical_protein_LW858_31670_(plasmid)_[Bacillus_cereus]                                 | CPTF_metals_mix | 930710.7667 | 627992.5288 | 67.47450994 |
| UIJ69895.1 | hypothetical_protein_LW858_31670_(plasmid)_[Bacillus_cereus]                                 | CPTF_zcontrol   | 351928.8333 | 321843.6759 | 91.45135193 |
| UIJ69917.1 | helix-turn-helix_domain-containing_protein_(plasmid)_[Bacillus_cereus]                       | CPTF_Al         | 25510.9     | 44186.17495 | 173.2050808 |
| UIJ69917.1 | helix-turn-helix_domain-containing_protein_(plasmid)_[Bacillus_cereus]                       | CPTF_Cd         | 0           | 0           | 0           |
| UIJ69917.1 | helix-turn-helix_domain-containing_protein_(plasmid)_[Bacillus_cereus]                       | CPTF_Co         | 82284.56667 | 73175.43397 | 88.92971906 |
| UIJ69917.1 | helix-turn-helix_domain-containing_protein_(plasmid)_[Bacillus_cereus]                       | CPTF_Cu         | 67939.43333 | 51292.79544 | 75.49782641 |
| UIJ69917.1 | helix-turn-helix_domain-containing_protein_(plasmid)_[Bacillus_cereus]                       | CPTF_Fe         | 46282.96667 | 40888.4914  | 88.34457759 |
| UIJ69917.1 | helix-turn-helix_domain-containing_protein_(plasmid)_[Bacillus_cereus]                       | CPTF_Mn         | 0           | 0           | 0           |

|            |                                                                                               |                 |             |             |             |
|------------|-----------------------------------------------------------------------------------------------|-----------------|-------------|-------------|-------------|
| UIJ69917.1 | helix-turn-helix_domain-containing_protein_(plasmid)_ [Bacillus_cereus]                       | CPTF_Ni         | 45765.53333 | 61104.45793 | 133.5163244 |
| UIJ69917.1 | helix-turn-helix_domain-containing_protein_(plasmid)_ [Bacillus_cereus]                       | CPTF_U          | 0           | 0           | 0           |
| UIJ69917.1 | helix-turn-helix_domain-containing_protein_(plasmid)_ [Bacillus_cereus]                       | CPTF_metals_mix | 17746.16667 | 30737.26231 | 173.2050808 |
| UIJ69917.1 | helix-turn-helix_domain-containing_protein_(plasmid)_ [Bacillus_cereus]                       | CPTF_zcontrol   | 63748.66667 | 69974.9198  | 109.7668759 |
| UIJ69922.1 | Rpn_family_recombination-promoting_nuclease/putative_transposase_(plasmid)_ [Bacillus_cereus] | CPTF_AI         | 214511      | 25082.25171 | 11.69275781 |
| UIJ69922.1 | Rpn_family_recombination-promoting_nuclease/putative_transposase_(plasmid)_ [Bacillus_cereus] | CPTF_Cd         | 149576.1667 | 119794.1573 | 80.08906768 |
| UIJ69922.1 | Rpn_family_recombination-promoting_nuclease/putative_transposase_(plasmid)_ [Bacillus_cereus] | CPTF_Co         | 58742.66667 | 101745.2832 | 173.2050808 |
| UIJ69922.1 | Rpn_family_recombination-promoting_nuclease/putative_transposase_(plasmid)_ [Bacillus_cereus] | CPTF_Cu         | 148854.3333 | 257823.2683 | 173.2050808 |
| UIJ69922.1 | Rpn_family_recombination-promoting_nuclease/putative_transposase_(plasmid)_ [Bacillus_cereus] | CPTF_Fe         | 11293.4     | 19560.74259 | 173.2050808 |
| UIJ69922.1 | Rpn_family_recombination-promoting_nuclease/putative_transposase_(plasmid)_ [Bacillus_cereus] | CPTF_Mn         | 232676.1667 | 211847.9023 | 91.0483894  |
| UIJ69922.1 | Rpn_family_recombination-promoting_nuclease/putative_transposase_(plasmid)_ [Bacillus_cereus] | CPTF_Ni         | 314119      | 287610.5053 | 91.56100245 |
| UIJ69922.1 | Rpn_family_recombination-promoting_nuclease/putative_transposase_(plasmid)_ [Bacillus_cereus] | CPTF_U          | 238184.3333 | 210659.9984 | 88.44410356 |
| UIJ69922.1 | Rpn_family_recombination-promoting_nuclease/putative_transposase_(plasmid)_ [Bacillus_cereus] | CPTF_metals_mix | 581625      | 34635.34803 | 5.954927664 |
| UIJ69922.1 | Rpn_family_recombination-promoting_nuclease/putative_transposase_(plasmid)_ [Bacillus_cereus] | CPTF_zcontrol   | 0           | 0           | 0           |
| UIJ69928.1 | transposase_(plasmid)_ [Bacillus_cereus]                                                      | CPTF_AI         | 17313.8     | 29988.38127 | 173.2050808 |
| UIJ69928.1 | transposase_(plasmid)_ [Bacillus_cereus]                                                      | CPTF_Cd         | 50640.43333 | 44125.47454 | 87.1348676  |
| UIJ69928.1 | transposase_(plasmid)_ [Bacillus_cereus]                                                      | CPTF_Co         | 0           | 0           | 0           |
| UIJ69928.1 | transposase_(plasmid)_ [Bacillus_cereus]                                                      | CPTF_Cu         | 0           | 0           | 0           |
| UIJ69928.1 | transposase_(plasmid)_ [Bacillus_cereus]                                                      | CPTF_Fe         | 0           | 0           | 0           |
| UIJ69928.1 | transposase_(plasmid)_ [Bacillus_cereus]                                                      | CPTF_Mn         | 0           | 0           | 0           |
| UIJ69928.1 | transposase_(plasmid)_ [Bacillus_cereus]                                                      | CPTF_Ni         | 0           | 0           | 0           |
| UIJ69928.1 | transposase_(plasmid)_ [Bacillus_cereus]                                                      | CPTF_U          | 0           | 0           | 0           |
| UIJ69928.1 | transposase_(plasmid)_ [Bacillus_cereus]                                                      | CPTF_metals_mix | 23380.06667 | 40495.46335 | 173.2050808 |
| UIJ69928.1 | transposase_(plasmid)_ [Bacillus_cereus]                                                      | CPTF_zcontrol   | 20979       | 36336.69389 | 173.2050808 |
| UIJ69930.1 | MMPL_family_transporter_(plasmid)_ [Bacillus_cereus]                                          | CPTF_AI         | 808356.1    | 31264.76796 | 3.867697412 |
| UIJ69930.1 | MMPL_family_transporter_(plasmid)_ [Bacillus_cereus]                                          | CPTF_Cd         | 1063607.333 | 32119.78195 | 3.019890982 |
| UIJ69930.1 | MMPL_family_transporter_(plasmid)_ [Bacillus_cereus]                                          | CPTF_Co         | 938468.8333 | 40734.44047 | 4.340521392 |
| UIJ69930.1 | MMPL_family_transporter_(plasmid)_ [Bacillus_cereus]                                          | CPTF_Cu         | 603615.6333 | 42271.84037 | 7.003105625 |
| UIJ69930.1 | MMPL_family_transporter_(plasmid)_ [Bacillus_cereus]                                          | CPTF_Fe         | 731546.2    | 238136.9567 | 32.5525193  |
| UIJ69930.1 | MMPL_family_transporter_(plasmid)_ [Bacillus_cereus]                                          | CPTF_Mn         | 707106.0667 | 117887.6003 | 16.67184117 |
| UIJ69930.1 | MMPL_family_transporter_(plasmid)_ [Bacillus_cereus]                                          | CPTF_Ni         | 832656.7333 | 104550.0145 | 12.55619637 |
| UIJ69930.1 | MMPL_family_transporter_(plasmid)_ [Bacillus_cereus]                                          | CPTF_U          | 739184.5333 | 201883.9455 | 27.31171127 |
| UIJ69930.1 | MMPL_family_transporter_(plasmid)_ [Bacillus_cereus]                                          | CPTF_metals_mix | 417937.3    | 147517.3306 | 35.29652189 |
| UIJ69930.1 | MMPL_family_transporter_(plasmid)_ [Bacillus_cereus]                                          | CPTF_zcontrol   | 653956.0667 | 143537.7965 | 21.94914976 |
| UIJ69954.1 | efflux_RND_transporter_periplasmic_adaptor_subunit_(plasmid)_ [Bacillus_cereus]               | CPTF_AI         | 118611.8    | 31730.2119  | 26.75131134 |
| UIJ69954.1 | efflux_RND_transporter_periplasmic_adaptor_subunit_(plasmid)_ [Bacillus_cereus]               | CPTF_Cd         | 119850.7    | 39144.98709 | 32.66145887 |
| UIJ69954.1 | efflux_RND_transporter_periplasmic_adaptor_subunit_(plasmid)_ [Bacillus_cereus]               | CPTF_Co         | 150283.1667 | 72851.29912 | 48.47602079 |
| UIJ69954.1 | efflux_RND_transporter_periplasmic_adaptor_subunit_(plasmid)_ [Bacillus_cereus]               | CPTF_Cu         | 72397.43333 | 32105.31273 | 44.34592671 |
| UIJ69954.1 | efflux_RND_transporter_periplasmic_adaptor_subunit_(plasmid)_ [Bacillus_cereus]               | CPTF_Fe         | 85994.4     | 51984.58005 | 60.45112245 |
| UIJ69954.1 | efflux_RND_transporter_periplasmic_adaptor_subunit_(plasmid)_ [Bacillus_cereus]               | CPTF_Mn         | 85206.76667 | 25393.18053 | 29.80183561 |
| UIJ69954.1 | efflux_RND_transporter_periplasmic_adaptor_subunit_(plasmid)_ [Bacillus_cereus]               | CPTF_Ni         | 111588.4333 | 24739.20883 | 22.17004764 |
| UIJ69954.1 | efflux_RND_transporter_periplasmic_adaptor_subunit_(plasmid)_ [Bacillus_cereus]               | CPTF_U          | 79984.43333 | 26390.79349 | 32.99491213 |
| UIJ69954.1 | efflux_RND_transporter_periplasmic_adaptor_subunit_(plasmid)_ [Bacillus_cereus]               | CPTF_metals_mix | 25865.03333 | 15842.02744 | 61.24881894 |
| UIJ69954.1 | efflux_RND_transporter_periplasmic_adaptor_subunit_(plasmid)_ [Bacillus_cereus]               | CPTF_zcontrol   | 80260.26667 | 13566.1988  | 16.90275819 |
| UIJ69961.1 | DUF2089_domain-containing_protein_(plasmid)_ [Bacillus_cereus]                                | CPTF_AI         | 0           | 0           | 0           |
| UIJ69961.1 | DUF2089_domain-containing_protein_(plasmid)_ [Bacillus_cereus]                                | CPTF_Cd         | 0           | 0           | 0           |
| UIJ69961.1 | DUF2089_domain-containing_protein_(plasmid)_ [Bacillus_cereus]                                | CPTF_Co         | 0           | 0           | 0           |
| UIJ69961.1 | DUF2089_domain-containing_protein_(plasmid)_ [Bacillus_cereus]                                | CPTF_Cu         | 17054.5     | 4046.613422 | 23.72754066 |
| UIJ69961.1 | DUF2089_domain-containing_protein_(plasmid)_ [Bacillus_cereus]                                | CPTF_Fe         | 0           | 0           | 0           |
| UIJ69961.1 | DUF2089_domain-containing_protein_(plasmid)_ [Bacillus_cereus]                                | CPTF_Mn         | 0           | 0           | 0           |
| UIJ69961.1 | DUF2089_domain-containing_protein_(plasmid)_ [Bacillus_cereus]                                | CPTF_Ni         | 3696.36667  | 6402.29487  | 173.2050808 |
| UIJ69961.1 | DUF2089_domain-containing_protein_(plasmid)_ [Bacillus_cereus]                                | CPTF_U          | 0           | 0           | 0           |
| UIJ69961.1 | DUF2089_domain-containing_protein_(plasmid)_ [Bacillus_cereus]                                | CPTF_metals_mix | 8421.643333 | 10941.53676 | 129.9216356 |
| UIJ69961.1 | DUF2089_domain-containing_protein_(plasmid)_ [Bacillus_cereus]                                | CPTF_zcontrol   | 0           | 0           | 0           |
| UIJ69965.1 | ParM/StbA_family_protein_(plasmid)_ [Bacillus_cereus]                                         | CPTF_AI         | 1530745.267 | 209045.9221 | 13.65648006 |
| UIJ69965.1 | ParM/StbA_family_protein_(plasmid)_ [Bacillus_cereus]                                         | CPTF_Cd         | 1604748.133 | 151166.2954 | 9.419939005 |
| UIJ69965.1 | ParM/StbA_family_protein_(plasmid)_ [Bacillus_cereus]                                         | CPTF_Co         | 963880.8667 | 92739.3196  | 9.62145041  |
| UIJ69965.1 | ParM/StbA_family_protein_(plasmid)_ [Bacillus_cereus]                                         | CPTF_Cu         | 1687492.3   | 606855.9244 | 35.96199665 |
| UIJ69965.1 | ParM/StbA_family_protein_(plasmid)_ [Bacillus_cereus]                                         | CPTF_Fe         | 1282729.667 | 373097.5807 | 28.98341288 |
| UIJ69965.1 | ParM/StbA_family_protein_(plasmid)_ [Bacillus_cereus]                                         | CPTF_Mn         | 1543666.5   | 233707.0314 | 15.13973591 |
| UIJ69965.1 | ParM/StbA_family_protein_(plasmid)_ [Bacillus_cereus]                                         | CPTF_Ni         | 868558.7667 | 109504.8596 | 12.60765118 |



|            |                                                                                              |                 |             |             |             |
|------------|----------------------------------------------------------------------------------------------|-----------------|-------------|-------------|-------------|
| UIJ69965.1 | ParM/StbA_family_protein_(plasmid)_[Bacillus_cereus]                                         | CPTF_U          | 843415.3    | 7022.412753 | 0.832616239 |
| UIJ69965.1 | ParM/StbA_family_protein_(plasmid)_[Bacillus_cereus]                                         | CPTF_metals_mix | 719310.8667 | 20143.53306 | 2.800393265 |
| UIJ69965.1 | ParM/StbA_family_protein_(plasmid)_[Bacillus_cereus]                                         | CPTF_zcontrol   | 847339.9333 | 89170.95304 | 10.52363397 |
| UIJ69972.1 | peptidylprolyl_isomerase_(plasmid)_[Bacillus_cereus]                                         | CPTF_Al         | 7661499.7   | 54711.6649  | 7.141051834 |
| UIJ69972.1 | peptidylprolyl_isomerase_(plasmid)_[Bacillus_cereus]                                         | CPTF_Cd         | 8372708.667 | 1451507.616 | 17.33617726 |
| UIJ69972.1 | peptidylprolyl_isomerase_(plasmid)_[Bacillus_cereus]                                         | CPTF_Co         | 7209297.933 | 1005576.547 | 13.94832834 |
| UIJ69972.1 | peptidylprolyl_isomerase_(plasmid)_[Bacillus_cereus]                                         | CPTF_Cu         | 8143979.733 | 1237432.209 | 15.19444117 |
| UIJ69972.1 | peptidylprolyl_isomerase_(plasmid)_[Bacillus_cereus]                                         | CPTF_Fe         | 7279122.967 | 527732.597  | 7.249947548 |
| UIJ69972.1 | peptidylprolyl_isomerase_(plasmid)_[Bacillus_cereus]                                         | CPTF_Mn         | 9267591.933 | 2327682.55  | 25.1163686  |
| UIJ69972.1 | peptidylprolyl_isomerase_(plasmid)_[Bacillus_cereus]                                         | CPTF_Ni         | 6426473.4   | 472472.1397 | 7.351966005 |
| UIJ69972.1 | peptidylprolyl_isomerase_(plasmid)_[Bacillus_cereus]                                         | CPTF_U          | 6226495.533 | 1280889.233 | 20.57159162 |
| UIJ69972.1 | peptidylprolyl_isomerase_(plasmid)_[Bacillus_cereus]                                         | CPTF_metals_mix | 14085989.47 | 1567701.789 | 11.1295113  |
| UIJ69972.1 | peptidylprolyl_isomerase_(plasmid)_[Bacillus_cereus]                                         | CPTF_zcontrol   | 7437823.133 | 480504.6957 | 6.460286661 |
| UIJ69986.1 | ABC_transporter_ATP-binding_protein_(plasmid)_[Bacillus_cereus]                              | CPTF_Al         | 504838.3333 | 45267.36882 | 8.966705941 |
| UIJ69986.1 | ABC_transporter_ATP-binding_protein_(plasmid)_[Bacillus_cereus]                              | CPTF_Cd         | 519633.6333 | 5167.040778 | 0.994362267 |
| UIJ69986.1 | ABC_transporter_ATP-binding_protein_(plasmid)_[Bacillus_cereus]                              | CPTF_Co         | 571141.9667 | 27488.17849 | 4.812845158 |
| UIJ69986.1 | ABC_transporter_ATP-binding_protein_(plasmid)_[Bacillus_cereus]                              | CPTF_Cu         | 541720.8333 | 68370.37874 | 12.62096167 |
| UIJ69986.1 | ABC_transporter_ATP-binding_protein_(plasmid)_[Bacillus_cereus]                              | CPTF_Fe         | 549228.1667 | 54302.07271 | 9.886978856 |
| UIJ69986.1 | ABC_transporter_ATP-binding_protein_(plasmid)_[Bacillus_cereus]                              | CPTF_Mn         | 550252.5    | 173117.6668 | 31.46149573 |
| UIJ69986.1 | ABC_transporter_ATP-binding_protein_(plasmid)_[Bacillus_cereus]                              | CPTF_Ni         | 595260.3667 | 101280.8525 | 17.01454661 |
| UIJ69986.1 | ABC_transporter_ATP-binding_protein_(plasmid)_[Bacillus_cereus]                              | CPTF_U          | 677989      | 133254.0112 | 19.65430283 |
| UIJ69986.1 | ABC_transporter_ATP-binding_protein_(plasmid)_[Bacillus_cereus]                              | CPTF_metals_mix | 429353.1    | 176079.607  | 41.01042468 |
| UIJ69986.1 | ABC_transporter_ATP-binding_protein_(plasmid)_[Bacillus_cereus]                              | CPTF_zcontrol   | 673154.3333 | 22228.89186 | 3.302198435 |
| UIJ69989.1 | efflux_RND_transporter_periplasmic_adaptor_subunit_(plasmid)_[Bacillus_cereus]               | CPTF_Al         | 27913.5     | 10910.40357 | 39.08647634 |
| UIJ69989.1 | efflux_RND_transporter_periplasmic_adaptor_subunit_(plasmid)_[Bacillus_cereus]               | CPTF_Cd         | 0           | 0           | 0           |
| UIJ69989.1 | efflux_RND_transporter_periplasmic_adaptor_subunit_(plasmid)_[Bacillus_cereus]               | CPTF_Co         | 94794.46333 | 38955.71127 | 41.09492254 |
| UIJ69989.1 | efflux_RND_transporter_periplasmic_adaptor_subunit_(plasmid)_[Bacillus_cereus]               | CPTF_Cu         | 21023.8     | 8509.823002 | 40.47709264 |
| UIJ69989.1 | efflux_RND_transporter_periplasmic_adaptor_subunit_(plasmid)_[Bacillus_cereus]               | CPTF_Fe         | 6248.466667 | 10822.66174 | 173.2050808 |
| UIJ69989.1 | efflux_RND_transporter_periplasmic_adaptor_subunit_(plasmid)_[Bacillus_cereus]               | CPTF_Mn         | 7344.3      | 12720.70075 | 173.2050808 |
| UIJ69989.1 | efflux_RND_transporter_periplasmic_adaptor_subunit_(plasmid)_[Bacillus_cereus]               | CPTF_Ni         | 61000.83333 | 64025.44718 | 104.9583156 |
| UIJ69989.1 | efflux_RND_transporter_periplasmic_adaptor_subunit_(plasmid)_[Bacillus_cereus]               | CPTF_U          | 16456       | 14423.71171 | 87.6501684  |
| UIJ69989.1 | efflux_RND_transporter_periplasmic_adaptor_subunit_(plasmid)_[Bacillus_cereus]               | CPTF_metals_mix | 10208.66667 | 8870.543544 | 86.89228314 |
| UIJ69989.1 | efflux_RND_transporter_periplasmic_adaptor_subunit_(plasmid)_[Bacillus_cereus]               | CPTF_zcontrol   | 26656.96667 | 6697.898521 | 25.12625913 |
| UIJ69993.1 | Rpn_family_recombination-promoting_nuclease/putative_transposase_(plasmid)_[Bacillus_cereus] | CPTF_Al         | 198118.9667 | 128858.0505 | 65.04074429 |
| UIJ69993.1 | Rpn_family_recombination-promoting_nuclease/putative_transposase_(plasmid)_[Bacillus_cereus] | CPTF_Cd         | 146193.3333 | 131992.1567 | 90.28602995 |
| UIJ69993.1 | Rpn_family_recombination-promoting_nuclease/putative_transposase_(plasmid)_[Bacillus_cereus] | CPTF_Co         | 269096.4667 | 77265.95249 | 28.71310554 |
| UIJ69993.1 | Rpn_family_recombination-promoting_nuclease/putative_transposase_(plasmid)_[Bacillus_cereus] | CPTF_Cu         | 311401.9667 | 39370.52972 | 12.64299328 |
| UIJ69993.1 | Rpn_family_recombination-promoting_nuclease/putative_transposase_(plasmid)_[Bacillus_cereus] | CPTF_Fe         | 146053.9    | 138197.5873 | 94.62094976 |
| UIJ69993.1 | Rpn_family_recombination-promoting_nuclease/putative_transposase_(plasmid)_[Bacillus_cereus] | CPTF_Mn         | 83853.5     | 80925.17821 | 96.50781209 |
| UIJ69993.1 | Rpn_family_recombination-promoting_nuclease/putative_transposase_(plasmid)_[Bacillus_cereus] | CPTF_Ni         | 263692.1    | 35128.26007 | 13.32169605 |
| UIJ69993.1 | Rpn_family_recombination-promoting_nuclease/putative_transposase_(plasmid)_[Bacillus_cereus] | CPTF_U          | 208819.6667 | 123420.7235 | 59.10397496 |
| UIJ69993.1 | Rpn_family_recombination-promoting_nuclease/putative_transposase_(plasmid)_[Bacillus_cereus] | CPTF_metals_mix | 281947.8333 | 203027.4691 | 72.00887723 |
| UIJ69993.1 | Rpn_family_recombination-promoting_nuclease/putative_transposase_(plasmid)_[Bacillus_cereus] | CPTF_zcontrol   | 161095.4    | 139953.2598 | 86.87601246 |
| UIJ70000.1 | HU_family_DNA-binding_protein_(plasmid)_[Bacillus_cereus]                                    | CPTF_Al         | 720051.3    | 71806.26877 | 9.972382353 |
| UIJ70000.1 | HU_family_DNA-binding_protein_(plasmid)_[Bacillus_cereus]                                    | CPTF_Cd         | 804826.9    | 76607.91271 | 9.518557681 |
| UIJ70000.1 | HU_family_DNA-binding_protein_(plasmid)_[Bacillus_cereus]                                    | CPTF_Co         | 937619.1667 | 86566.15159 | 9.232549276 |
| UIJ70000.1 | HU_family_DNA-binding_protein_(plasmid)_[Bacillus_cereus]                                    | CPTF_Cu         | 804090.4333 | 58584.96473 | 7.285867646 |
| UIJ70000.1 | HU_family_DNA-binding_protein_(plasmid)_[Bacillus_cereus]                                    | CPTF_Fe         | 721742.0333 | 61008.03109 | 8.452885972 |
| UIJ70000.1 | HU_family_DNA-binding_protein_(plasmid)_[Bacillus_cereus]                                    | CPTF_Mn         | 770318.6333 | 96974.60796 | 12.58889553 |
| UIJ70000.1 | HU_family_DNA-binding_protein_(plasmid)_[Bacillus_cereus]                                    | CPTF_Ni         | 811978.8333 | 65949.31423 | 8.122048448 |
| UIJ70000.1 | HU_family_DNA-binding_protein_(plasmid)_[Bacillus_cereus]                                    | CPTF_U          | 596459      | 73551.61841 | 12.33137876 |
| UIJ70000.1 | HU_family_DNA-binding_protein_(plasmid)_[Bacillus_cereus]                                    | CPTF_metals_mix | 1653892.933 | 139601.3234 | 8.440771505 |
| UIJ70000.1 | HU_family_DNA-binding_protein_(plasmid)_[Bacillus_cereus]                                    | CPTF_zcontrol   | 648020      | 41397.93913 | 6.388373681 |
| UIJ70014.1 | tetratricopeptide_repeat_protein_(plasmid)_[Bacillus_cereus]                                 | CPTF_Al         | 2278974.333 | 753771.5534 | 33.07503478 |
| UIJ70014.1 | tetratricopeptide_repeat_protein_(plasmid)_[Bacillus_cereus]                                 | CPTF_Cd         | 1774602.333 | 483572.1542 | 27.24960658 |
| UIJ70014.1 | tetratricopeptide_repeat_protein_(plasmid)_[Bacillus_cereus]                                 | CPTF_Co         | 2379886     | 445543.1085 | 18.72119541 |
| UIJ70014.1 | tetratricopeptide_repeat_protein_(plasmid)_[Bacillus_cereus]                                 | CPTF_Cu         | 1907118     | 527943.1239 | 27.6827718  |
| UIJ70014.1 | tetratricopeptide_repeat_protein_(plasmid)_[Bacillus_cereus]                                 | CPTF_Fe         | 1866762.667 | 72634.60328 | 3.890939356 |
| UIJ70014.1 | tetratricopeptide_repeat_protein_(plasmid)_[Bacillus_cereus]                                 | CPTF_Mn         | 2554711.833 | 356382.8014 | 13.9500196  |
| UIJ70014.1 | tetratricopeptide_repeat_protein_(plasmid)_[Bacillus_cereus]                                 | CPTF_Ni         | 2238110.667 | 211659.9559 | 9.457081773 |
| UIJ70014.1 | tetratricopeptide_repeat_protein_(plasmid)_[Bacillus_cereus]                                 | CPTF_U          | 1584564     | 1028205.451 | 64.8888559  |

|            |                                                              |                 |             |             |             |
|------------|--------------------------------------------------------------|-----------------|-------------|-------------|-------------|
| UIJ70014.1 | tetratricopeptide_repeat_protein_(plasmid)_[Bacillus_cereus] | CPTF_metals_mix | 942728.8667 | 146807.0661 | 15.57256506 |
| UIJ70014.1 | tetratricopeptide_repeat_protein_(plasmid)_[Bacillus_cereus] | CPTF_zcontrol   | 2295345.333 | 993757.7223 | 43.29447547 |
| UIJ70017.1 | hypothetical_protein_LW858_32375_(plasmid)_[Bacillus_cereus] | CPTF_Al         | 142923.6667 | 127868.3285 | 89.46616852 |
| UIJ70017.1 | hypothetical_protein_LW858_32375_(plasmid)_[Bacillus_cereus] | CPTF_Cd         | 206223.6667 | 48537.99668 | 23.53657922 |
| UIJ70017.1 | hypothetical_protein_LW858_32375_(plasmid)_[Bacillus_cereus] | CPTF_Co         | 98376       | 85630.78139 | 87.04438215 |
| UIJ70017.1 | hypothetical_protein_LW858_32375_(plasmid)_[Bacillus_cereus] | CPTF_Cu         | 179445.6667 | 26711.79225 | 14.88572711 |
| UIJ70017.1 | hypothetical_protein_LW858_32375_(plasmid)_[Bacillus_cereus] | CPTF_Fe         | 187411.6667 | 12750.41538 | 6.803426705 |
| UIJ70017.1 | hypothetical_protein_LW858_32375_(plasmid)_[Bacillus_cereus] | CPTF_Mn         | 86232       | 74679.97033 | 86.60354663 |
| UIJ70017.1 | hypothetical_protein_LW858_32375_(plasmid)_[Bacillus_cereus] | CPTF_Ni         | 51918       | 89924.61383 | 173.2050808 |
| UIJ70017.1 | hypothetical_protein_LW858_32375_(plasmid)_[Bacillus_cereus] | CPTF_U          | 157071.6667 | 25323.91483 | 16.12252252 |
| UIJ70017.1 | hypothetical_protein_LW858_32375_(plasmid)_[Bacillus_cereus] | CPTF_metals_mix | 222059.4333 | 51469.04964 | 23.17805142 |
| UIJ70017.1 | hypothetical_protein_LW858_32375_(plasmid)_[Bacillus_cereus] | CPTF_zcontrol   | 182199.6667 | 19804.96191 | 10.86992214 |
| UIJ70018.1 | ParM/StbA_family_protein_(plasmid)_[Bacillus_cereus]         | CPTF_Al         | 2335074.4   | 306439.3888 | 13.12332441 |
| UIJ70018.1 | ParM/StbA_family_protein_(plasmid)_[Bacillus_cereus]         | CPTF_Cd         | 1998424.767 | 104155.6288 | 5.211886409 |
| UIJ70018.1 | ParM/StbA_family_protein_(plasmid)_[Bacillus_cereus]         | CPTF_Co         | 2242216.1   | 87051.82308 | 3.882401124 |
| UIJ70018.1 | ParM/StbA_family_protein_(plasmid)_[Bacillus_cereus]         | CPTF_Cu         | 2669852.5   | 374749.8801 | 14.03635145 |
| UIJ70018.1 | ParM/StbA_family_protein_(plasmid)_[Bacillus_cereus]         | CPTF_Fe         | 2068966.067 | 121186.9374 | 5.857367087 |
| UIJ70018.1 | ParM/StbA_family_protein_(plasmid)_[Bacillus_cereus]         | CPTF_Mn         | 1630693.5   | 173922.1639 | 10.66553365 |
| UIJ70018.1 | ParM/StbA_family_protein_(plasmid)_[Bacillus_cereus]         | CPTF_Ni         | 2216731.033 | 239254.2231 | 10.79311019 |
| UIJ70018.1 | ParM/StbA_family_protein_(plasmid)_[Bacillus_cereus]         | CPTF_U          | 1800254.433 | 575117.264  | 31.94644342 |
| UIJ70018.1 | ParM/StbA_family_protein_(plasmid)_[Bacillus_cereus]         | CPTF_metals_mix | 2421000.433 | 54456.3974  | 2.249334475 |
| UIJ70018.1 | ParM/StbA_family_protein_(plasmid)_[Bacillus_cereus]         | CPTF_zcontrol   | 1661466.967 | 621634.5492 | 37.41480039 |
| UIJ70027.1 | hypothetical_protein_LW858_32425_(plasmid)_[Bacillus_cereus] | CPTF_Al         | 1260000     | 1091237.829 | 86.60617693 |
| UIJ70027.1 | hypothetical_protein_LW858_32425_(plasmid)_[Bacillus_cereus] | CPTF_Cd         | 570000      | 987268.9603 | 173.2050808 |
| UIJ70027.1 | hypothetical_protein_LW858_32425_(plasmid)_[Bacillus_cereus] | CPTF_Co         | 543333.3333 | 941080.9388 | 173.2050808 |
| UIJ70027.1 | hypothetical_protein_LW858_32425_(plasmid)_[Bacillus_cereus] | CPTF_Cu         | 0           | 0           | 0           |
| UIJ70027.1 | hypothetical_protein_LW858_32425_(plasmid)_[Bacillus_cereus] | CPTF_Fe         | 540000      | 935307.4361 | 173.2050808 |
| UIJ70027.1 | hypothetical_protein_LW858_32425_(plasmid)_[Bacillus_cereus] | CPTF_Mn         | 680000      | 1177794.549 | 173.2050808 |
| UIJ70027.1 | hypothetical_protein_LW858_32425_(plasmid)_[Bacillus_cereus] | CPTF_Ni         | 0           | 0           | 0           |
| UIJ70027.1 | hypothetical_protein_LW858_32425_(plasmid)_[Bacillus_cereus] | CPTF_U          | 197017.6667 | 341244.6087 | 173.2050808 |
| UIJ70027.1 | hypothetical_protein_LW858_32425_(plasmid)_[Bacillus_cereus] | CPTF_metals_mix | 1433333.333 | 150111.07   | 10.47286535 |
| UIJ70027.1 | hypothetical_protein_LW858_32425_(plasmid)_[Bacillus_cereus] | CPTF_zcontrol   | 640000      | 1108512.517 | 173.2050808 |
| UIJ70029.1 | hypothetical_protein_LW858_32435_(plasmid)_[Bacillus_cereus] | CPTF_Al         | 359159.4    | 45993.41873 | 12.80585131 |
| UIJ70029.1 | hypothetical_protein_LW858_32435_(plasmid)_[Bacillus_cereus] | CPTF_Cd         | 14651.93333 | 25377.89296 | 173.2050808 |
| UIJ70029.1 | hypothetical_protein_LW858_32435_(plasmid)_[Bacillus_cereus] | CPTF_Co         | 103543.2    | 137360.7081 | 132.6602887 |
| UIJ70029.1 | hypothetical_protein_LW858_32435_(plasmid)_[Bacillus_cereus] | CPTF_Cu         | 133464.4    | 95521.82155 | 71.57101186 |
| UIJ70029.1 | hypothetical_protein_LW858_32435_(plasmid)_[Bacillus_cereus] | CPTF_Fe         | 113005      | 195730.4015 | 173.2050808 |
| UIJ70029.1 | hypothetical_protein_LW858_32435_(plasmid)_[Bacillus_cereus] | CPTF_Mn         | 136387.9333 | 125980.5615 | 92.36928698 |
| UIJ70029.1 | hypothetical_protein_LW858_32435_(plasmid)_[Bacillus_cereus] | CPTF_Ni         | 125914.5333 | 147672.84   | 117.2802186 |
| UIJ70029.1 | hypothetical_protein_LW858_32435_(plasmid)_[Bacillus_cereus] | CPTF_U          | 0           | 0           | 0           |
| UIJ70029.1 | hypothetical_protein_LW858_32435_(plasmid)_[Bacillus_cereus] | CPTF_metals_mix | 49469.33333 | 76648.748   | 154.9419465 |
| UIJ70029.1 | hypothetical_protein_LW858_32435_(plasmid)_[Bacillus_cereus] | CPTF_zcontrol   | 47820.43333 | 82827.42017 | 173.2050808 |
| UIJ70064.1 | HU_family_DNA-binding_protein_(plasmid)_[Bacillus_cereus]    | CPTF_Al         | 869577.2    | 44767.13649 | 5.148149755 |
| UIJ70064.1 | HU_family_DNA-binding_protein_(plasmid)_[Bacillus_cereus]    | CPTF_Cd         | 763461.2667 | 147415.7141 | 19.30886616 |
| UIJ70064.1 | HU_family_DNA-binding_protein_(plasmid)_[Bacillus_cereus]    | CPTF_Co         | 938693.4667 | 26464.70827 | 2.819313142 |
| UIJ70064.1 | HU_family_DNA-binding_protein_(plasmid)_[Bacillus_cereus]    | CPTF_Cu         | 911101.3333 | 80406.37627 | 8.825184788 |
| UIJ70064.1 | HU_family_DNA-binding_protein_(plasmid)_[Bacillus_cereus]    | CPTF_Fe         | 827153.7    | 39142.00757 | 4.73213232  |
| UIJ70064.1 | HU_family_DNA-binding_protein_(plasmid)_[Bacillus_cereus]    | CPTF_Mn         | 729414.6    | 65155.42106 | 8.932563327 |
| UIJ70064.1 | HU_family_DNA-binding_protein_(plasmid)_[Bacillus_cereus]    | CPTF_Ni         | 974560      | 94379.72539 | 9.684342204 |
| UIJ70064.1 | HU_family_DNA-binding_protein_(plasmid)_[Bacillus_cereus]    | CPTF_U          | 956002.0667 | 176332.4064 | 18.44477251 |
| UIJ70064.1 | HU_family_DNA-binding_protein_(plasmid)_[Bacillus_cereus]    | CPTF_metals_mix | 891319.8667 | 35248.54776 | 3.954646258 |
| UIJ70064.1 | HU_family_DNA-binding_protein_(plasmid)_[Bacillus_cereus]    | CPTF_zcontrol   | 897780.0667 | 74416.648   | 8.288961937 |
| UIJ70065.1 | hypothetical_protein_LW858_32620_(plasmid)_[Bacillus_cereus] | CPTF_Al         | 0           | 0           | 0           |
| UIJ70065.1 | hypothetical_protein_LW858_32620_(plasmid)_[Bacillus_cereus] | CPTF_Cd         | 0           | 0           | 0           |
| UIJ70065.1 | hypothetical_protein_LW858_32620_(plasmid)_[Bacillus_cereus] | CPTF_Co         | 0           | 0           | 0           |
| UIJ70065.1 | hypothetical_protein_LW858_32620_(plasmid)_[Bacillus_cereus] | CPTF_Cu         | 0           | 0           | 0           |
| UIJ70065.1 | hypothetical_protein_LW858_32620_(plasmid)_[Bacillus_cereus] | CPTF_Fe         | 0           | 0           | 0           |
| UIJ70065.1 | hypothetical_protein_LW858_32620_(plasmid)_[Bacillus_cereus] | CPTF_Mn         | 0           | 0           | 0           |
| UIJ70065.1 | hypothetical_protein_LW858_32620_(plasmid)_[Bacillus_cereus] | CPTF_Ni         | 0           | 0           | 0           |
| UIJ70065.1 | hypothetical_protein_LW858_32620_(plasmid)_[Bacillus_cereus] | CPTF_U          | 0           | 0           | 0           |
| UIJ70065.1 | hypothetical_protein_LW858_32620_(plasmid)_[Bacillus_cereus] | CPTF_metals_mix | 48150       | 83398.24638 | 173.2050808 |

|            |                                                                        |                 |             |             |              |
|------------|------------------------------------------------------------------------|-----------------|-------------|-------------|--------------|
| UIJ70065.1 | hypothetical_protein_LW858_32620_(plasmid)_[Bacillus_cereus]           | CPTF_zcontrol   | 0           | 0           | 0            |
| UIJ70084.1 | DUF2325_domain-containing_protein_(plasmid)_[Bacillus_cereus]          | CPTF_Al         | 367006.3333 | 47718.84203 | 13.00218489  |
| UIJ70084.1 | DUF2325_domain-containing_protein_(plasmid)_[Bacillus_cereus]          | CPTF_Cd         | 739350.6667 | 36872.48991 | 4.987145014  |
| UIJ70084.1 | DUF2325_domain-containing_protein_(plasmid)_[Bacillus_cereus]          | CPTF_Co         | 393982.3667 | 110052.5449 | 27.93336815  |
| UIJ70084.1 | DUF2325_domain-containing_protein_(plasmid)_[Bacillus_cereus]          | CPTF_Cu         | 319737      | 69425.90546 | 21.71344119  |
| UIJ70084.1 | DUF2325_domain-containing_protein_(plasmid)_[Bacillus_cereus]          | CPTF_Fe         | 344991      | 54251.913   | 15.72560241  |
| UIJ70084.1 | DUF2325_domain-containing_protein_(plasmid)_[Bacillus_cereus]          | CPTF_Mn         | 168596.1667 | 214359.8729 | 127.1439779  |
| UIJ70084.1 | DUF2325_domain-containing_protein_(plasmid)_[Bacillus_cereus]          | CPTF_Ni         | 203839.6    | 176843.8469 | 86.75637459  |
| UIJ70084.1 | DUF2325_domain-containing_protein_(plasmid)_[Bacillus_cereus]          | CPTF_U          | 149124.3333 | 133361.2017 | 89.42953756  |
| UIJ70084.1 | DUF2325_domain-containing_protein_(plasmid)_[Bacillus_cereus]          | CPTF_metals_mix | 685225.8    | 259106.6188 | 37.81331917  |
| UIJ70084.1 | DUF2325_domain-containing_protein_(plasmid)_[Bacillus_cereus]          | CPTF_zcontrol   | 287756.3333 | 83731.51827 | 29.09806269  |
| UIJ70088.1 | tyrosine-type_recombinase/integrase_(plasmid)_[Bacillus_cereus]        | CPTF_Al         | 26320.33333 | 28427.11647 | 108.00439338 |
| UIJ70088.1 | tyrosine-type_recombinase/integrase_(plasmid)_[Bacillus_cereus]        | CPTF_Cd         | 0           | 0           | 0            |
| UIJ70088.1 | tyrosine-type_recombinase/integrase_(plasmid)_[Bacillus_cereus]        | CPTF_Co         | 47163.56667 | 29585.1632  | 62.72885046  |
| UIJ70088.1 | tyrosine-type_recombinase/integrase_(plasmid)_[Bacillus_cereus]        | CPTF_Cu         | 73912.4     | 83189.88668 | 112.552003   |
| UIJ70088.1 | tyrosine-type_recombinase/integrase_(plasmid)_[Bacillus_cereus]        | CPTF_Fe         | 12214.43333 | 21156.01912 | 173.2050808  |
| UIJ70088.1 | tyrosine-type_recombinase/integrase_(plasmid)_[Bacillus_cereus]        | CPTF_Mn         | 0           | 0           | 0            |
| UIJ70088.1 | tyrosine-type_recombinase/integrase_(plasmid)_[Bacillus_cereus]        | CPTF_Ni         | 8328.333333 | 14425.09648 | 173.2050808  |
| UIJ70088.1 | tyrosine-type_recombinase/integrase_(plasmid)_[Bacillus_cereus]        | CPTF_U          | 7840.166667 | 13579.56701 | 173.2050808  |
| UIJ70088.1 | tyrosine-type_recombinase/integrase_(plasmid)_[Bacillus_cereus]        | CPTF_metals_mix | 35852.33333 | 62098.0629  | 173.2050808  |
| UIJ70088.1 | tyrosine-type_recombinase/integrase_(plasmid)_[Bacillus_cereus]        | CPTF_zcontrol   | 30621.43333 | 53037.87833 | 173.2050808  |
| UIJ70108.1 | ParM/StbA_family_protein_(plasmid)_[Bacillus_cereus]                   | CPTF_Al         | 1603691.333 | 84556.04512 | 5.254012469  |
| UIJ70108.1 | ParM/StbA_family_protein_(plasmid)_[Bacillus_cereus]                   | CPTF_Cd         | 1566455.333 | 61096.38821 | 3.900295585  |
| UIJ70108.1 | ParM/StbA_family_protein_(plasmid)_[Bacillus_cereus]                   | CPTF_Co         | 1502566.433 | 145356.4245 | 9.673876724  |
| UIJ70108.1 | ParM/StbA_family_protein_(plasmid)_[Bacillus_cereus]                   | CPTF_Cu         | 1603746.333 | 219950.0118 | 13.71476319  |
| UIJ70108.1 | ParM/StbA_family_protein_(plasmid)_[Bacillus_cereus]                   | CPTF_Fe         | 1529635.333 | 528502.3757 | 34.55087394  |
| UIJ70108.1 | ParM/StbA_family_protein_(plasmid)_[Bacillus_cereus]                   | CPTF_Mn         | 1784294.133 | 181399.8987 | 10.16647958  |
| UIJ70108.1 | ParM/StbA_family_protein_(plasmid)_[Bacillus_cereus]                   | CPTF_Ni         | 2044156     | 150239.6764 | 7.349716773  |
| UIJ70108.1 | ParM/StbA_family_protein_(plasmid)_[Bacillus_cereus]                   | CPTF_U          | 1335510.333 | 579420.5176 | 43.38570082  |
| UIJ70108.1 | ParM/StbA_family_protein_(plasmid)_[Bacillus_cereus]                   | CPTF_metals_mix | 1279965.667 | 249502.9317 | 19.49293939  |
| UIJ70108.1 | ParM/StbA_family_protein_(plasmid)_[Bacillus_cereus]                   | CPTF_zcontrol   | 1939685.333 | 135027.9392 | 6.961332174  |
| UIJ70135.1 | hypothetical_protein_LW858_33235_(plasmid)_[Bacillus_cereus]           | CPTF_Al         | 368712.3333 | 61024.76776 | 16.55078017  |
| UIJ70135.1 | hypothetical_protein_LW858_33235_(plasmid)_[Bacillus_cereus]           | CPTF_Cd         | 91998.33333 | 159345.7875 | 173.2050808  |
| UIJ70135.1 | hypothetical_protein_LW858_33235_(plasmid)_[Bacillus_cereus]           | CPTF_Co         | 399597.6667 | 54688.63202 | 13.68592376  |
| UIJ70135.1 | hypothetical_protein_LW858_33235_(plasmid)_[Bacillus_cereus]           | CPTF_Cu         | 173979      | 186861.4043 | 107.4045743  |
| UIJ70135.1 | hypothetical_protein_LW858_33235_(plasmid)_[Bacillus_cereus]           | CPTF_Fe         | 246513.3333 | 224095.6483 | 90.90609635  |
| UIJ70135.1 | hypothetical_protein_LW858_33235_(plasmid)_[Bacillus_cereus]           | CPTF_Mn         | 294013.6667 | 68501.21068 | 23.29864848  |
| UIJ70135.1 | hypothetical_protein_LW858_33235_(plasmid)_[Bacillus_cereus]           | CPTF_Ni         | 280482.6667 | 162294.4199 | 57.86254881  |
| UIJ70135.1 | hypothetical_protein_LW858_33235_(plasmid)_[Bacillus_cereus]           | CPTF_U          | 379064.6667 | 198418.344  | 52.34419387  |
| UIJ70135.1 | hypothetical_protein_LW858_33235_(plasmid)_[Bacillus_cereus]           | CPTF_metals_mix | 226584      | 96463.71586 | 42.57304834  |
| UIJ70135.1 | hypothetical_protein_LW858_33235_(plasmid)_[Bacillus_cereus]           | CPTF_zcontrol   | 342541      | 26887.66238 | 7.849472727  |
| UIJ70137.1 | hypothetical_protein_LW858_33040_(plasmid)_[Bacillus_cereus]           | CPTF_Al         | 938442.1    | 231007.7937 | 24.61609445  |
| UIJ70137.1 | hypothetical_protein_LW858_33040_(plasmid)_[Bacillus_cereus]           | CPTF_Cd         | 939878.4667 | 280952.4851 | 29.89242706  |
| UIJ70137.1 | hypothetical_protein_LW858_33040_(plasmid)_[Bacillus_cereus]           | CPTF_Co         | 1485283.8   | 153449.174  | 10.33130329  |
| UIJ70137.1 | hypothetical_protein_LW858_33040_(plasmid)_[Bacillus_cereus]           | CPTF_Cu         | 1476209.633 | 360989.7844 | 24.45382934  |
| UIJ70137.1 | hypothetical_protein_LW858_33040_(plasmid)_[Bacillus_cereus]           | CPTF_Fe         | 814734.5333 | 141134.2032 | 17.32272261  |
| UIJ70137.1 | hypothetical_protein_LW858_33040_(plasmid)_[Bacillus_cereus]           | CPTF_Mn         | 737814.7667 | 176563.0647 | 23.93054092  |
| UIJ70137.1 | hypothetical_protein_LW858_33040_(plasmid)_[Bacillus_cereus]           | CPTF_Ni         | 911767.8667 | 183234.0498 | 20.09656805  |
| UIJ70137.1 | hypothetical_protein_LW858_33040_(plasmid)_[Bacillus_cereus]           | CPTF_U          | 769109.4667 | 207503.2455 | 26.97967642  |
| UIJ70137.1 | hypothetical_protein_LW858_33040_(plasmid)_[Bacillus_cereus]           | CPTF_metals_mix | 1920207.7   | 19440.58797 | 1.012421103  |
| UIJ70137.1 | hypothetical_protein_LW858_33040_(plasmid)_[Bacillus_cereus]           | CPTF_zcontrol   | 812924.7667 | 11707.44357 | 1.440163229  |
| UIJ70138.1 | helix-turn-helix_domain-containing_protein_(plasmid)_[Bacillus_cereus] | CPTF_Al         | 504859.6667 | 236700.7127 | 46.88445688  |
| UIJ70138.1 | helix-turn-helix_domain-containing_protein_(plasmid)_[Bacillus_cereus] | CPTF_Cd         | 380004.3333 | 60999.53155 | 16.05232525  |
| UIJ70138.1 | helix-turn-helix_domain-containing_protein_(plasmid)_[Bacillus_cereus] | CPTF_Co         | 594302.3333 | 388351.9069 | 65.34584926  |
| UIJ70138.1 | helix-turn-helix_domain-containing_protein_(plasmid)_[Bacillus_cereus] | CPTF_Cu         | 764066.3333 | 120252.4651 | 15.73848498  |
| UIJ70138.1 | helix-turn-helix_domain-containing_protein_(plasmid)_[Bacillus_cereus] | CPTF_Fe         | 470442      | 151784.1938 | 32.26416727  |
| UIJ70138.1 | helix-turn-helix_domain-containing_protein_(plasmid)_[Bacillus_cereus] | CPTF_Mn         | 674040.6667 | 232129.2841 | 34.43846871  |
| UIJ70138.1 | helix-turn-helix_domain-containing_protein_(plasmid)_[Bacillus_cereus] | CPTF_Ni         | 693993.3333 | 326897.9461 | 47.10390293  |
| UIJ70138.1 | helix-turn-helix_domain-containing_protein_(plasmid)_[Bacillus_cereus] | CPTF_U          | 356824.4    | 240280.3867 | 67.33855273  |
| UIJ70138.1 | helix-turn-helix_domain-containing_protein_(plasmid)_[Bacillus_cereus] | CPTF_metals_mix | 594119.8333 | 210268.1115 | 35.3915321   |
| UIJ70138.1 | helix-turn-helix_domain-containing_protein_(plasmid)_[Bacillus_cereus] | CPTF_zcontrol   | 363710.6667 | 20725.16032 | 5.698254745  |

|            |                                                                                              |                 |             |             |              |
|------------|----------------------------------------------------------------------------------------------|-----------------|-------------|-------------|--------------|
| UIJ70149.1 | Rpn_family_recombination-promoting_nuclease/putative_transposase_(plasmid)_[Bacillus_cereus] | CPTF_Al         | 1476123.867 | 16958.89284 | 1.148880065  |
| UIJ70149.1 | Rpn_family_recombination-promoting_nuclease/putative_transposase_(plasmid)_[Bacillus_cereus] | CPTF_Cd         | 1499199.567 | 124320.0124 | 8.292425851  |
| UIJ70149.1 | Rpn_family_recombination-promoting_nuclease/putative_transposase_(plasmid)_[Bacillus_cereus] | CPTF_Co         | 1276682.333 | 168300.1054 | 13.18261411  |
| UIJ70149.1 | Rpn_family_recombination-promoting_nuclease/putative_transposase_(plasmid)_[Bacillus_cereus] | CPTF_Cu         | 1320772.5   | 94032.75918 | 7.119527336  |
| UIJ70149.1 | Rpn_family_recombination-promoting_nuclease/putative_transposase_(plasmid)_[Bacillus_cereus] | CPTF_Fe         | 1497707.633 | 280221.4655 | 18.71002452  |
| UIJ70149.1 | Rpn_family_recombination-promoting_nuclease/putative_transposase_(plasmid)_[Bacillus_cereus] | CPTF_Mn         | 1377679.5   | 198903.0095 | 14.43753859  |
| UIJ70149.1 | Rpn_family_recombination-promoting_nuclease/putative_transposase_(plasmid)_[Bacillus_cereus] | CPTF_Ni         | 1033063.2   | 158144.2211 | 15.30828134  |
| UIJ70149.1 | Rpn_family_recombination-promoting_nuclease/putative_transposase_(plasmid)_[Bacillus_cereus] | CPTF_U          | 1358568.033 | 215223.067  | 15.84190572  |
| UIJ70149.1 | Rpn_family_recombination-promoting_nuclease/putative_transposase_(plasmid)_[Bacillus_cereus] | CPTF_metals_mix | 1072146.5   | 66733.18101 | 6.224259559  |
| UIJ70149.1 | Rpn_family_recombination-promoting_nuclease/putative_transposase_(plasmid)_[Bacillus_cereus] | CPTF_zcontrol   | 1419968.633 | 71838.02522 | 5.059127612  |
| UIJ70161.1 | S1_family_peptidase_(plasmid)_[Bacillus_cereus]                                              | CPTF_Al         | 663476.6333 | 56100.28175 | 8.455502264  |
| UIJ70161.1 | S1_family_peptidase_(plasmid)_[Bacillus_cereus]                                              | CPTF_Cd         | 325102.3    | 287890.4711 | 88.55380941  |
| UIJ70161.1 | S1_family_peptidase_(plasmid)_[Bacillus_cereus]                                              | CPTF_Co         | 458635.4667 | 313257.839  | 68.30214009  |
| UIJ70161.1 | S1_family_peptidase_(plasmid)_[Bacillus_cereus]                                              | CPTF_Cu         | 222600.4    | 249892.6483 | 112.26064666 |
| UIJ70161.1 | S1_family_peptidase_(plasmid)_[Bacillus_cereus]                                              | CPTF_Fe         | 539298.9667 | 414549.7345 | 76.86826049  |
| UIJ70161.1 | S1_family_peptidase_(plasmid)_[Bacillus_cereus]                                              | CPTF_Mn         | 684659.7667 | 19039.18705 | 2.780824575  |
| UIJ70161.1 | S1_family_peptidase_(plasmid)_[Bacillus_cereus]                                              | CPTF_Ni         | 307308.6333 | 377785.1961 | 122.9334796  |
| UIJ70161.1 | S1_family_peptidase_(plasmid)_[Bacillus_cereus]                                              | CPTF_U          | 280338.0333 | 355598.5093 | 126.8463309  |
| UIJ70161.1 | S1_family_peptidase_(plasmid)_[Bacillus_cereus]                                              | CPTF_metals_mix | 279673.5667 | 106627.3526 | 38.12564552  |
| UIJ70161.1 | S1_family_peptidase_(plasmid)_[Bacillus_cereus]                                              | CPTF_zcontrol   | 273069.8    | 361812.5224 | 132.4981827  |
| UIJ70166.1 | spermidine_N1-acetyltransferase_(plasmid)_[Bacillus_cereus]                                  | CPTF_Al         | 314208.6667 | 37217.54777 | 11.8448508   |
| UIJ70166.1 | spermidine_N1-acetyltransferase_(plasmid)_[Bacillus_cereus]                                  | CPTF_Cd         | 190805.6667 | 168579.4348 | 88.35137745  |
| UIJ70166.1 | spermidine_N1-acetyltransferase_(plasmid)_[Bacillus_cereus]                                  | CPTF_Co         | 317088      | 32386.23881 | 10.21364379  |
| UIJ70166.1 | spermidine_N1-acetyltransferase_(plasmid)_[Bacillus_cereus]                                  | CPTF_Cu         | 229941.6667 | 30549.65069 | 13.28582642  |
| UIJ70166.1 | spermidine_N1-acetyltransferase_(plasmid)_[Bacillus_cereus]                                  | CPTF_Fe         | 182878      | 158530.4666 | 86.68646124  |
| UIJ70166.1 | spermidine_N1-acetyltransferase_(plasmid)_[Bacillus_cereus]                                  | CPTF_Mn         | 288271.3333 | 70034.304   | 24.29457803  |
| UIJ70166.1 | spermidine_N1-acetyltransferase_(plasmid)_[Bacillus_cereus]                                  | CPTF_Ni         | 209924.3333 | 185738.4762 | 88.47877389  |
| UIJ70166.1 | spermidine_N1-acetyltransferase_(plasmid)_[Bacillus_cereus]                                  | CPTF_U          | 220746.3333 | 192202.7635 | 87.06951574  |
| UIJ70166.1 | spermidine_N1-acetyltransferase_(plasmid)_[Bacillus_cereus]                                  | CPTF_metals_mix | 0           | 0           | 0            |
| UIJ70166.1 | spermidine_N1-acetyltransferase_(plasmid)_[Bacillus_cereus]                                  | CPTF_zcontrol   | 259632.3333 | 224969.8193 | 86.64938469  |
| UIJ70167.1 | 5'-nucleotidase_lipoprotein_e(P4)_family_(plasmid)_[Bacillus_cereus]                         | CPTF_Al         | 171169      | 296473.4047 | 173.2050808  |
| UIJ70167.1 | 5'-nucleotidase_lipoprotein_e(P4)_family_(plasmid)_[Bacillus_cereus]                         | CPTF_Cd         | 176097.3333 | 305009.5284 | 173.2050808  |
| UIJ70167.1 | 5'-nucleotidase_lipoprotein_e(P4)_family_(plasmid)_[Bacillus_cereus]                         | CPTF_Co         | 0           | 0           | 0            |
| UIJ70167.1 | 5'-nucleotidase_lipoprotein_e(P4)_family_(plasmid)_[Bacillus_cereus]                         | CPTF_Cu         | 0           | 0           | 0            |
| UIJ70167.1 | 5'-nucleotidase_lipoprotein_e(P4)_family_(plasmid)_[Bacillus_cereus]                         | CPTF_Fe         | 0           | 0           | 0            |
| UIJ70167.1 | 5'-nucleotidase_lipoprotein_e(P4)_family_(plasmid)_[Bacillus_cereus]                         | CPTF_Mn         | 0           | 0           | 0            |
| UIJ70167.1 | 5'-nucleotidase_lipoprotein_e(P4)_family_(plasmid)_[Bacillus_cereus]                         | CPTF_Ni         | 105591      | 182888.9768 | 173.2050808  |
| UIJ70167.1 | 5'-nucleotidase_lipoprotein_e(P4)_family_(plasmid)_[Bacillus_cereus]                         | CPTF_U          | 0           | 0           | 0            |
| UIJ70167.1 | 5'-nucleotidase_lipoprotein_e(P4)_family_(plasmid)_[Bacillus_cereus]                         | CPTF_metals_mix | 226269.2333 | 201464.5862 | 89.03755197  |
| UIJ70167.1 | 5'-nucleotidase_lipoprotein_e(P4)_family_(plasmid)_[Bacillus_cereus]                         | CPTF_zcontrol   | 0           | 0           | 0            |
| UIJ70168.1 | hypothetical_protein_LW858_33620_(plasmid)_[Bacillus_cereus]                                 | CPTF_Al         | 0           | 0           | 0            |
| UIJ70168.1 | hypothetical_protein_LW858_33620_(plasmid)_[Bacillus_cereus]                                 | CPTF_Cd         | 0           | 0           | 0            |
| UIJ70168.1 | hypothetical_protein_LW858_33620_(plasmid)_[Bacillus_cereus]                                 | CPTF_Co         | 0           | 0           | 0            |
| UIJ70168.1 | hypothetical_protein_LW858_33620_(plasmid)_[Bacillus_cereus]                                 | CPTF_Cu         | 0           | 0           | 0            |
| UIJ70168.1 | hypothetical_protein_LW858_33620_(plasmid)_[Bacillus_cereus]                                 | CPTF_Fe         | 0           | 0           | 0            |
| UIJ70168.1 | hypothetical_protein_LW858_33620_(plasmid)_[Bacillus_cereus]                                 | CPTF_Mn         | 0           | 0           | 0            |
| UIJ70168.1 | hypothetical_protein_LW858_33620_(plasmid)_[Bacillus_cereus]                                 | CPTF_Ni         | 0           | 0           | 0            |
| UIJ70168.1 | hypothetical_protein_LW858_33620_(plasmid)_[Bacillus_cereus]                                 | CPTF_U          | 346333.333  | 552931.5811 | 15.9653007   |
| UIJ70168.1 | hypothetical_protein_LW858_33620_(plasmid)_[Bacillus_cereus]                                 | CPTF_metals_mix | 282904.3333 | 49625.79618 | 17.54154685  |
| UIJ70168.1 | hypothetical_protein_LW858_33620_(plasmid)_[Bacillus_cereus]                                 | CPTF_zcontrol   | 0           | 0           | 0            |
| UIJ70184.1 | ParM/StbA_family_protein_(plasmid)_[Bacillus_cereus]                                         | CPTF_Al         | 6161133     | 121671.6772 | 1.974826337  |
| UIJ70184.1 | ParM/StbA_family_protein_(plasmid)_[Bacillus_cereus]                                         | CPTF_Cd         | 6616132.167 | 264995.0146 | 4.005285987  |
| UIJ70184.1 | ParM/StbA_family_protein_(plasmid)_[Bacillus_cereus]                                         | CPTF_Co         | 5064329     | 54791.88213 | 1.081917903  |
| UIJ70184.1 | ParM/StbA_family_protein_(plasmid)_[Bacillus_cereus]                                         | CPTF_Cu         | 5768636.2   | 727071.4743 | 12.60387116  |
| UIJ70184.1 | ParM/StbA_family_protein_(plasmid)_[Bacillus_cereus]                                         | CPTF_Fe         | 6166224.333 | 31621.09445 | 0.512811288  |
| UIJ70184.1 | ParM/StbA_family_protein_(plasmid)_[Bacillus_cereus]                                         | CPTF_Mn         | 6525412.667 | 125628.229  | 1.925215085  |
| UIJ70184.1 | ParM/StbA_family_protein_(plasmid)_[Bacillus_cereus]                                         | CPTF_Ni         | 5075480     | 421635.3415 | 8.307299831  |
| UIJ70184.1 | ParM/StbA_family_protein_(plasmid)_[Bacillus_cereus]                                         | CPTF_U          | 5519945.933 | 360169.1577 | 6.52486749   |
| UIJ70184.1 | ParM/StbA_family_protein_(plasmid)_[Bacillus_cereus]                                         | CPTF_metals_mix | 5487244.6   | 338631.239  | 6.171243742  |
| UIJ70184.1 | ParM/StbA_family_protein_(plasmid)_[Bacillus_cereus]                                         | CPTF_zcontrol   | 5643750     | 209323.7491 | 3.708947935  |
| UIJ70187.1 | AimR_family_lysine-lysogeny_pheromone_receptor_(plasmid)_[Bacillus_cereus]                   | CPTF_Al         | 404946.6667 | 18084.69304 | 4.465944414  |

|            |                                                                            |                 |             |             |             |
|------------|----------------------------------------------------------------------------|-----------------|-------------|-------------|-------------|
| UIJ70187.1 | AimR_family_lysis-lysogeny_pheromone_receptor_(plasmid)_[Bacillus_cereus]  | CPTF_Cd         | 392581.3333 | 72874.7076  | 18.56295789 |
| UIJ70187.1 | AimR_family_lysis-lysogeny_pheromone_receptor_(plasmid)_[Bacillus_cereus]  | CPTF_Co         | 397584      | 120921.8946 | 30.41417527 |
| UIJ70187.1 | AimR_family_lysis-lysogeny_pheromone_receptor_(plasmid)_[Bacillus_cereus]  | CPTF_Cu         | 267162      | 131729.4471 | 49.30695498 |
| UIJ70187.1 | AimR_family_lysis-lysogeny_pheromone_receptor_(plasmid)_[Bacillus_cereus]  | CPTF_Fe         | 383376.3333 | 24064.50451 | 6.276992714 |
| UIJ70187.1 | AimR_family_lysis-lysogeny_pheromone_receptor_(plasmid)_[Bacillus_cereus]  | CPTF_Mn         | 329059.6667 | 64949.26968 | 19.73783975 |
| UIJ70187.1 | AimR_family_lysis-lysogeny_pheromone_receptor_(plasmid)_[Bacillus_cereus]  | CPTF_Ni         | 392045.3333 | 64155.95499 | 16.36442256 |
| UIJ70187.1 | AimR_family_lysis-lysogeny_pheromone_receptor_(plasmid)_[Bacillus_cereus]  | CPTF_U          | 388549      | 26115.73717 | 6.721349732 |
| UIJ70187.1 | AimR_family_lysis-lysogeny_pheromone_receptor_(plasmid)_[Bacillus_cereus]  | CPTF_metals_mix | 36830.66667 | 63792.58594 | 173.2050808 |
| UIJ70187.1 | AimR_family_lysis-lysogeny_pheromone_receptor_(plasmid)_[Bacillus_cereus]  | CPTF_zcontrol   | 358379      | 14476.53318 | 4.039447954 |
| UIJ70189.1 | helix-turn-helix_domain-containing_protein_(plasmid)_[Bacillus_cereus]     | CPTF_Al         | 41685.1     | 41657.67713 | 99.93421422 |
| UIJ70189.1 | helix-turn-helix_domain-containing_protein_(plasmid)_[Bacillus_cereus]     | CPTF_Cd         | 22244.11    | 31187.35708 | 140.2050119 |
| UIJ70189.1 | helix-turn-helix_domain-containing_protein_(plasmid)_[Bacillus_cereus]     | CPTF_Co         | 23894.46667 | 25353.08494 | 106.1044186 |
| UIJ70189.1 | helix-turn-helix_domain-containing_protein_(plasmid)_[Bacillus_cereus]     | CPTF_Cu         | 25432.03333 | 7128.507112 | 28.02963891 |
| UIJ70189.1 | helix-turn-helix_domain-containing_protein_(plasmid)_[Bacillus_cereus]     | CPTF_Fe         | 14211.26667 | 12872.11212 | 90.57681079 |
| UIJ70189.1 | helix-turn-helix_domain-containing_protein_(plasmid)_[Bacillus_cereus]     | CPTF_Mn         | 5225        | 9049.96547  | 173.2050808 |
| UIJ70189.1 | helix-turn-helix_domain-containing_protein_(plasmid)_[Bacillus_cereus]     | CPTF_Ni         | 23248.3     | 2589.235171 | 11.1373097  |
| UIJ70189.1 | helix-turn-helix_domain-containing_protein_(plasmid)_[Bacillus_cereus]     | CPTF_U          | 0           | 0           | 0           |
| UIJ70189.1 | helix-turn-helix_domain-containing_protein_(plasmid)_[Bacillus_cereus]     | CPTF_metals_mix | 30016.13333 | 26738.62131 | 89.080832   |
| UIJ70189.1 | helix-turn-helix_domain-containing_protein_(plasmid)_[Bacillus_cereus]     | CPTF_zcontrol   | 15822.53333 | 13814.34137 | 87.30802509 |
| UIJ70191.1 | Cys-Gln_thioester_bond-forming_surface_protein_(plasmid)_[Bacillus_cereus] | CPTF_Al         | 527479.3333 | 362647.2117 | 68.75098015 |
| UIJ70191.1 | Cys-Gln_thioester_bond-forming_surface_protein_(plasmid)_[Bacillus_cereus] | CPTF_Cd         | 120717.6667 | 209089.132  | 173.2050808 |
| UIJ70191.1 | Cys-Gln_thioester_bond-forming_surface_protein_(plasmid)_[Bacillus_cereus] | CPTF_Co         | 0           | 0           | 0           |
| UIJ70191.1 | Cys-Gln_thioester_bond-forming_surface_protein_(plasmid)_[Bacillus_cereus] | CPTF_Cu         | 0           | 0           | 0           |
| UIJ70191.1 | Cys-Gln_thioester_bond-forming_surface_protein_(plasmid)_[Bacillus_cereus] | CPTF_Fe         | 239281.3333 | 258837.2979 | 108.1727915 |
| UIJ70191.1 | Cys-Gln_thioester_bond-forming_surface_protein_(plasmid)_[Bacillus_cereus] | CPTF_Mn         | 0           | 0           | 0           |
| UIJ70191.1 | Cys-Gln_thioester_bond-forming_surface_protein_(plasmid)_[Bacillus_cereus] | CPTF_Ni         | 0           | 0           | 0           |
| UIJ70191.1 | Cys-Gln_thioester_bond-forming_surface_protein_(plasmid)_[Bacillus_cereus] | CPTF_U          | 161585      | 142061.8846 | 87.91774272 |
| UIJ70191.1 | Cys-Gln_thioester_bond-forming_surface_protein_(plasmid)_[Bacillus_cereus] | CPTF_metals_mix | 23792.36667 | 41209.5879  | 173.2050808 |
| UIJ70191.1 | Cys-Gln_thioester_bond-forming_surface_protein_(plasmid)_[Bacillus_cereus] | CPTF_zcontrol   | 0           | 0           | 0           |
| UIJ70202.1 | hypothetical_protein_LW858_33665_(plasmid)_[Bacillus_cereus]               | CPTF_Al         | 990111.5667 | 236064.4211 | 23.84220416 |
| UIJ70202.1 | hypothetical_protein_LW858_33665_(plasmid)_[Bacillus_cereus]               | CPTF_Cd         | 968041.1333 | 100558.1097 | 10.38779306 |
| UIJ70202.1 | hypothetical_protein_LW858_33665_(plasmid)_[Bacillus_cereus]               | CPTF_Co         | 753270.3    | 147050.5357 | 19.52161604 |
| UIJ70202.1 | hypothetical_protein_LW858_33665_(plasmid)_[Bacillus_cereus]               | CPTF_Cu         | 828533.2    | 447662.2546 | 54.03069601 |
| UIJ70202.1 | hypothetical_protein_LW858_33665_(plasmid)_[Bacillus_cereus]               | CPTF_Fe         | 949627.0333 | 216799.9505 | 22.8300104  |
| UIJ70202.1 | hypothetical_protein_LW858_33665_(plasmid)_[Bacillus_cereus]               | CPTF_Mn         | 710287.3333 | 451789.9599 | 63.60664744 |
| UIJ70202.1 | hypothetical_protein_LW858_33665_(plasmid)_[Bacillus_cereus]               | CPTF_Ni         | 612336.2667 | 284860.9154 | 46.52034036 |
| UIJ70202.1 | hypothetical_protein_LW858_33665_(plasmid)_[Bacillus_cereus]               | CPTF_U          | 685702.6667 | 405713.2628 | 59.16752006 |
| UIJ70202.1 | hypothetical_protein_LW858_33665_(plasmid)_[Bacillus_cereus]               | CPTF_metals_mix | 1156684.733 | 85137.79784 | 7.36050156  |
| UIJ70202.1 | hypothetical_protein_LW858_33665_(plasmid)_[Bacillus_cereus]               | CPTF_zcontrol   | 567570.6667 | 287151.092  | 50.59301139 |
| UIJ70204.1 | replication/maintenance_protein_RepL_(plasmid)_[Bacillus_cereus]           | CPTF_Al         | 0           | 0           | 0           |
| UIJ70204.1 | replication/maintenance_protein_RepL_(plasmid)_[Bacillus_cereus]           | CPTF_Cd         | 0           | 0           | 0           |
| UIJ70204.1 | replication/maintenance_protein_RepL_(plasmid)_[Bacillus_cereus]           | CPTF_Co         | 0           | 0           | 0           |
| UIJ70204.1 | replication/maintenance_protein_RepL_(plasmid)_[Bacillus_cereus]           | CPTF_Cu         | 0           | 0           | 0           |
| UIJ70204.1 | replication/maintenance_protein_RepL_(plasmid)_[Bacillus_cereus]           | CPTF_Fe         | 59319       | 102743.5219 | 173.2050808 |
| UIJ70204.1 | replication/maintenance_protein_RepL_(plasmid)_[Bacillus_cereus]           | CPTF_Mn         | 0           | 0           | 0           |
| UIJ70204.1 | replication/maintenance_protein_RepL_(plasmid)_[Bacillus_cereus]           | CPTF_Ni         | 0           | 0           | 0           |
| UIJ70204.1 | replication/maintenance_protein_RepL_(plasmid)_[Bacillus_cereus]           | CPTF_U          | 0           | 0           | 0           |
| UIJ70204.1 | replication/maintenance_protein_RepL_(plasmid)_[Bacillus_cereus]           | CPTF_metals_mix | 41655.66667 | 72149.73109 | 173.2050808 |
| UIJ70204.1 | replication/maintenance_protein_RepL_(plasmid)_[Bacillus_cereus]           | CPTF_zcontrol   | 0           | 0           | 0           |
| UIJ70209.1 | replication/maintenance_protein_RepL_(plasmid)_[Bacillus_cereus]           | CPTF_Al         | 58014.93333 | 22788.19186 | 39.27987252 |
| UIJ70209.1 | replication/maintenance_protein_RepL_(plasmid)_[Bacillus_cereus]           | CPTF_Cd         | 41338.13333 | 38368.65595 | 92.81661473 |
| UIJ70209.1 | replication/maintenance_protein_RepL_(plasmid)_[Bacillus_cereus]           | CPTF_Co         | 54638       | 94635.79202 | 173.2050808 |
| UIJ70209.1 | replication/maintenance_protein_RepL_(plasmid)_[Bacillus_cereus]           | CPTF_Cu         | 135118.0333 | 61026.915   | 45.16563296 |
| UIJ70209.1 | replication/maintenance_protein_RepL_(plasmid)_[Bacillus_cereus]           | CPTF_Fe         | 38417.66667 | 66541.35057 | 173.2050808 |
| UIJ70209.1 | replication/maintenance_protein_RepL_(plasmid)_[Bacillus_cereus]           | CPTF_Mn         | 0           | 0           | 0           |
| UIJ70209.1 | replication/maintenance_protein_RepL_(plasmid)_[Bacillus_cereus]           | CPTF_Ni         | 48790.83333 | 46160.44982 | 94.60885718 |
| UIJ70209.1 | replication/maintenance_protein_RepL_(plasmid)_[Bacillus_cereus]           | CPTF_U          | 16080.46667 | 27852.18528 | 173.2050808 |
| UIJ70209.1 | replication/maintenance_protein_RepL_(plasmid)_[Bacillus_cereus]           | CPTF_metals_mix | 89770.13333 | 1128.349389 | 1.25693184  |
| UIJ70209.1 | replication/maintenance_protein_RepL_(plasmid)_[Bacillus_cereus]           | CPTF_zcontrol   | 0           | 0           | 0           |
| UIJ70213.1 | helix-turn-helix_domain-containing_protein_(plasmid)_[Bacillus_cereus]     | CPTF_Al         | 722750.8667 | 73173.89863 | 10.12435986 |
| UIJ70213.1 | helix-turn-helix_domain-containing_protein_(plasmid)_[Bacillus_cereus]     | CPTF_Cd         | 507692.1667 | 241535.4836 | 47.57518423 |

|            |                                                                        |                 |             |             |             |
|------------|------------------------------------------------------------------------|-----------------|-------------|-------------|-------------|
| UIJ70213.1 | helix-turn-helix_domain-containing_protein_(plasmid)_[Bacillus_cereus] | CPTF_Co         | 875929.2333 | 30133.5835  | 3.440184704 |
| UIJ70213.1 | helix-turn-helix_domain-containing_protein_(plasmid)_[Bacillus_cereus] | CPTF_Cu         | 910470.1    | 79260.16492 | 8.705411075 |
| UIJ70213.1 | helix-turn-helix_domain-containing_protein_(plasmid)_[Bacillus_cereus] | CPTF_Fe         | 787811.4    | 28728.01627 | 3.646560112 |
| UIJ70213.1 | helix-turn-helix_domain-containing_protein_(plasmid)_[Bacillus_cereus] | CPTF_Mn         | 739383.6667 | 35931.61024 | 4.859670542 |
| UIJ70213.1 | helix-turn-helix_domain-containing_protein_(plasmid)_[Bacillus_cereus] | CPTF_Ni         | 689937.2    | 140606.9129 | 20.37966831 |
| UIJ70213.1 | helix-turn-helix_domain-containing_protein_(plasmid)_[Bacillus_cereus] | CPTF_U          | 657822      | 159696.2854 | 24.27651939 |
| UIJ70213.1 | helix-turn-helix_domain-containing_protein_(plasmid)_[Bacillus_cereus] | CPTF_metals_mix | 997881.1333 | 90480.91344 | 9.067303752 |
| UIJ70213.1 | helix-turn-helix_domain-containing_protein_(plasmid)_[Bacillus_cereus] | CPTF_zcontrol   | 834918.8333 | 47995.10922 | 5.748476056 |
| UIJ70214.1 | plasmid_recombination_protein_(plasmid)_[Bacillus_cereus]              | CPTF_Al         | 484399.4667 | 133760.6968 | 27.61371679 |
| UIJ70214.1 | plasmid_recombination_protein_(plasmid)_[Bacillus_cereus]              | CPTF_Cd         | 865885.3    | 433268.6315 | 50.0376472  |
| UIJ70214.1 | plasmid_recombination_protein_(plasmid)_[Bacillus_cereus]              | CPTF_Co         | 1288684.8   | 608477.6297 | 47.21694783 |
| UIJ70214.1 | plasmid_recombination_protein_(plasmid)_[Bacillus_cereus]              | CPTF_Cu         | 1879290.633 | 555633.3265 | 29.56612015 |
| UIJ70214.1 | plasmid_recombination_protein_(plasmid)_[Bacillus_cereus]              | CPTF_Fe         | 587663.7667 | 291841.1576 | 49.6612475  |
| UIJ70214.1 | plasmid_recombination_protein_(plasmid)_[Bacillus_cereus]              | CPTF_Mn         | 700296.1667 | 135815.6577 | 19.39403129 |
| UIJ70214.1 | plasmid_recombination_protein_(plasmid)_[Bacillus_cereus]              | CPTF_Ni         | 965880.6333 | 280349.6447 | 29.02528894 |
| UIJ70214.1 | plasmid_recombination_protein_(plasmid)_[Bacillus_cereus]              | CPTF_U          | 560048.2667 | 443120.009  | 79.12175349 |
| UIJ70214.1 | plasmid_recombination_protein_(plasmid)_[Bacillus_cereus]              | CPTF_metals_mix | 2011293.267 | 395332.3368 | 19.65562871 |
| UIJ70214.1 | plasmid_recombination_protein_(plasmid)_[Bacillus_cereus]              | CPTF_zcontrol   | 707074.2667 | 642279.9559 | 90.83627932 |
| UIJ70217.1 | helix-turn-helix_transcriptional_regulator_(plasmid)_[Bacillus_cereus] | CPTF_Al         | 247143      | 8104.737565 | 3.279371686 |
| UIJ70217.1 | helix-turn-helix_transcriptional_regulator_(plasmid)_[Bacillus_cereus] | CPTF_Cd         | 201157      | 24540.79469 | 12.19982138 |
| UIJ70217.1 | helix-turn-helix_transcriptional_regulator_(plasmid)_[Bacillus_cereus] | CPTF_Co         | 203253      | 58237.92049 | 28.65292049 |
| UIJ70217.1 | helix-turn-helix_transcriptional_regulator_(plasmid)_[Bacillus_cereus] | CPTF_Cu         | 204201      | 25255.25664 | 12.3678418  |
| UIJ70217.1 | helix-turn-helix_transcriptional_regulator_(plasmid)_[Bacillus_cereus] | CPTF_Fe         | 227223.6667 | 99323.85255 | 43.71193107 |
| UIJ70217.1 | helix-turn-helix_transcriptional_regulator_(plasmid)_[Bacillus_cereus] | CPTF_Mn         | 140991.1667 | 97929.08113 | 69.45760039 |
| UIJ70217.1 | helix-turn-helix_transcriptional_regulator_(plasmid)_[Bacillus_cereus] | CPTF_Ni         | 58716.56667 | 62599.66017 | 106.6132843 |
| UIJ70217.1 | helix-turn-helix_transcriptional_regulator_(plasmid)_[Bacillus_cereus] | CPTF_U          | 196631      | 51095.53729 | 25.9854943  |
| UIJ70217.1 | helix-turn-helix_transcriptional_regulator_(plasmid)_[Bacillus_cereus] | CPTF_metals_mix | 93016       | 83674.46421 | 89.95706568 |
| UIJ70217.1 | helix-turn-helix_transcriptional_regulator_(plasmid)_[Bacillus_cereus] | CPTF_zcontrol   | 196928      | 12242.56824 | 6.216773763 |
| UIJ70219.1 | hypothetical_protein_LW858_33720_(plasmid)_[Bacillus_cereus]           | CPTF_Al         | 356259.6667 | 88024.25544 | 24.70789249 |
| UIJ70219.1 | hypothetical_protein_LW858_33720_(plasmid)_[Bacillus_cereus]           | CPTF_Cd         | 335397.8667 | 120197.802  | 35.83737821 |
| UIJ70219.1 | hypothetical_protein_LW858_33720_(plasmid)_[Bacillus_cereus]           | CPTF_Co         | 584270.7667 | 19748.18588 | 3.379971582 |
| UIJ70219.1 | hypothetical_protein_LW858_33720_(plasmid)_[Bacillus_cereus]           | CPTF_Cu         | 496249.4    | 66621.52201 | 13.42500807 |
| UIJ70219.1 | hypothetical_protein_LW858_33720_(plasmid)_[Bacillus_cereus]           | CPTF_Fe         | 220800.6333 | 50322.13612 | 22.79075715 |
| UIJ70219.1 | hypothetical_protein_LW858_33720_(plasmid)_[Bacillus_cereus]           | CPTF_Mn         | 296791.6333 | 185911.7522 | 62.64049633 |
| UIJ70219.1 | hypothetical_protein_LW858_33720_(plasmid)_[Bacillus_cereus]           | CPTF_Ni         | 274980.9333 | 174027.7246 | 63.28719686 |
| UIJ70219.1 | hypothetical_protein_LW858_33720_(plasmid)_[Bacillus_cereus]           | CPTF_U          | 237282      | 205542.5402 | 86.62373895 |
| UIJ70219.1 | hypothetical_protein_LW858_33720_(plasmid)_[Bacillus_cereus]           | CPTF_metals_mix | 341824.5    | 38010.27328 | 11.11982122 |
| UIJ70219.1 | hypothetical_protein_LW858_33720_(plasmid)_[Bacillus_cereus]           | CPTF_zcontrol   | 384395.6667 | 335776.127  | 87.35169413 |
