# Supplementary material for: Mixed heavy metal stress induces global iron starvation response
Source: PubMed Central journal article supplement (PMC9938188; doi:10.1038/s41396-022-01351-3), 2022-12-26
Supplement: 41396_2022_1351_MOESM3_ESM.pdf [file 41396_2022_1351_MOESM3_ESM.pdf]

| Genbank    | Protein (NCBI)                                                                                | COMM | U | Al | Mn | Fe | Co | Cu | Cd | Ni |
|------------|-----------------------------------------------------------------------------------------------|------|---|----|----|----|----|----|----|----|
| UIJ70168.1 | Hypothetical protein lw858 33620 (plasmid)                                                    |      |   |    |    |    |    |    |    |    |
| UIJ67978.1 | Transglycosylase                                                                              |      |   |    |    |    |    |    |    |    |
| UIJ69423.1 | Acyl carrier protein                                                                          |      |   |    |    |    |    |    |    |    |
| UIJ66240.1 | Translation initiation factor if-1                                                            |      |   |    |    |    |    |    |    |    |
| UIJ66811.1 | Ectonucleotide pyrophosphatase/phosphodiesterase                                              |      |   |    |    |    |    |    |    |    |
| UIJ64381.1 | Sdr family oxidoreductase                                                                     |      |   |    |    |    |    |    |    |    |
| UIJ68572.1 | Isochorismatase family protein                                                                |      |   |    |    |    |    |    |    |    |
| UIJ69446.1 | Flavodoxin-dependent (e)-4-hydroxy-3-methylbut-2-enyl-diphosphate synthase                    |      |   |    |    |    |    |    |    |    |
| UIJ65389.1 | Hypothetical protein lw858 20935                                                              |      |   |    |    |    |    |    |    |    |
| UIJ65324.1 | Trna threonylcarbamoyladenosine dehydratase                                                   |      |   |    |    |    |    |    |    |    |
| UIJ65937.1 | Ferritin                                                                                      |      |   |    |    |    |    |    |    |    |
| UIJ69189.1 | Copper homeostasis protein cutc                                                               |      |   |    |    |    |    |    |    |    |
| UIJ67731.1 | Duf3913 family protein                                                                        |      |   |    |    |    |    |    |    |    |
| UIJ64815.1 | Methionyl-trna formyltransferase                                                              |      |   |    |    |    |    |    |    |    |
| UIJ65126.1 | Elongation factor p                                                                           |      |   |    |    |    |    |    |    |    |
| UIJ64819.1 | Dna-directed rna polymerase subunit omega                                                     |      |   |    |    |    |    |    |    |    |
| UIJ66239.1 | 50s ribosomal protein l36                                                                     |      |   |    |    |    |    |    |    |    |
| UIJ65025.1 | Fixh family protein                                                                           |      |   |    |    |    |    |    |    |    |
| UIJ70191.1 | Cys-gln thioester bond-forming surface protein (plasmid)                                      |      |   |    |    |    |    |    |    |    |
| UIJ68566.1 | Ykvs family protein                                                                           |      |   |    |    |    |    |    |    |    |
| UIJ66464.1 | Ywhd family protein                                                                           |      |   |    |    |    |    |    |    |    |
| UIJ64511.1 | Flavodoxin                                                                                    |      |   |    |    |    |    |    |    |    |
| UIJ64690.1 | Iron-hydroxamate abc transporter substrate-binding protein                                    |      |   |    |    |    |    |    |    |    |
| UIJ64802.1 | Phosphate acyltransferase plsx                                                                |      |   |    |    |    |    |    |    |    |
| UIJ66462.1 | 4-oxalocrotonate tautomerase                                                                  |      |   |    |    |    |    |    |    |    |
| UIJ65464.1 | Hypothetical protein lw858 21360                                                              |      |   |    |    |    |    |    |    |    |
| UIJ66423.1 | Glycosyltransferase family 4 protein                                                          |      |   |    |    |    |    |    |    |    |
| UIJ64881.1 | Yugn-like family protein                                                                      |      |   |    |    |    |    |    |    |    |
| UIJ66035.1 | Degv family protein                                                                           |      |   |    |    |    |    |    |    |    |
| UIJ67343.1 | Hypothetical protein lw858 03415                                                              |      |   |    |    |    |    |    |    |    |
| UIJ69267.1 | Ld-carboxypeptidase                                                                           |      |   |    |    |    |    |    |    |    |
| UIJ65424.1 | Glutamate racemase                                                                            |      |   |    |    |    |    |    |    |    |
| UIJ67675.1 | (fe-s)-binding protein                                                                        |      |   |    |    |    |    |    |    |    |
| UIJ64895.1 | Pyridoxamine 5'-phosphate oxidase family protein                                              |      |   |    |    |    |    |    |    |    |
| UIJ65521.1 | Acetyl-coa carboxylase, carboxyltransferase subunit beta                                      |      |   |    |    |    |    |    |    |    |
| UIJ66957.1 | Peptide mfs transporter                                                                       |      |   |    |    |    |    |    |    |    |
| UIJ64909.1 | Gapa-binding peptide sr1p                                                                     |      |   |    |    |    |    |    |    |    |
| UIJ66132.1 | Trna (adenosine(37)-n6)-threonylcarbamoyltransferase complex dimerization subunit type 1 tsab |      |   |    |    |    |    |    |    |    |
| UIJ68520.1 | Yoku family protein                                                                           |      |   |    |    |    |    |    |    |    |
| UIJ66828.1 | Cadmium-translocating p-type atpase                                                           |      |   |    |    |    |    |    |    |    |
| UIJ69534.1 | Hypothetical protein lw858 30370 (plasmid)                                                    |      |   |    |    |    |    |    |    |    |
| UIJ66218.1 | Ybbr-like domain-containing protein                                                           |      |   |    |    |    |    |    |    |    |
| UIJ65729.1 | Yegs/rv2252/bmru family lipid kinase                                                          |      |   |    |    |    |    |    |    |    |
| UIJ67003.1 | D-ribose pyranase                                                                             |      |   |    |    |    |    |    |    |    |
| UIJ67412.1 | Duf6359 domain-containing protein                                                             |      |   |    |    |    |    |    |    |    |
| UIJ69494.1 | Duf3981 domain-containing protein                                                             |      |   |    |    |    |    |    |    |    |
| UIJ69045.1 | Polysaccharide deacetylase                                                                    |      |   |    |    |    |    |    |    |    |
| UIJ64950.1 | Aminotransferase a                                                                            |      |   |    |    |    |    |    |    |    |
| UIJ64425.1 | Fmn-binding negative transcriptional regulator                                                |      |   |    |    |    |    |    |    |    |
| UIJ66334.1 | 16s rna (cytidine(1402)-2'-o)-methyltransferase                                               |      |   |    |    |    |    |    |    |    |
| UIJ65000.1 | Duf1002 domain-containing protein                                                             |      |   |    |    |    |    |    |    |    |
| UIJ64683.1 | Copper chaperone copz                                                                         |      |   |    |    |    |    |    |    |    |
| UIJ68437.1 | Aspartate--trna(asn) ligase                                                                   |      |   |    |    |    |    |    |    |    |
| UIJ68322.1 | Chaperone csaa                                                                                |      |   |    |    |    |    |    |    |    |
| UIJ67975.1 | Response regulator                                                                            |      |   |    |    |    |    |    |    |    |
| UIJ65452.1 | Tetr family transcriptional regulator                                                         |      |   |    |    |    |    |    |    |    |
| UIJ65637.1 | Cyclic pyranopterin monophosphate synthase moac                                               |      |   |    |    |    |    |    |    |    |
| UIJ66367.1 | Trna uridine-5-carboxymethylaminomethyl(34) synthesis gtpase mnme                             |      |   |    |    |    |    |    |    |    |
| UIJ66516.1 | Ribose 5-phosphate isomerase b                                                                |      |   |    |    |    |    |    |    |    |
| UIJ64422.1 | Ydiu family protein                                                                           |      |   |    |    |    |    |    |    |    |
| UIJ64524.1 | 3-oxoacyl-acyl-p reductase fabg                                                               |      |   |    |    |    |    |    |    |    |
| UIJ66375.1 | Duf951 domain-containing protein                                                              |      |   |    |    |    |    |    |    |    |
| UIJ65239.1 | 50s ribosomal protein l11 methyltransferase                                                   |      |   |    |    |    |    |    |    |    |
| UIJ68298.1 | Nadph dehydrogenase nama                                                                      |      |   |    |    |    |    |    |    |    |
| UIJ66001.1 | Pyrophosphatase ppax                                                                          |      |   |    |    |    |    |    |    |    |
| UIJ66286.1 | 2-c-methyl-d-erythritol 2,4-cyclodiphosphate synthase                                         |      |   |    |    |    |    |    |    |    |
| UIJ68570.1 | Isochorismate synthase dhbc                                                                   |      |   |    |    |    |    |    |    |    |
| UIJ64868.1 | Duf177 domain-containing protein                                                              |      |   |    |    |    |    |    |    |    |
| UIJ65340.1 | Trna preq1(34) s-adenosylmethionine ribosyltransferase-isomerase quea                         |      |   |    |    |    |    |    |    |    |
| UIJ65097.1 | Glycerophosphodiester phosphodiesterase                                                       |      |   |    |    |    |    |    |    |    |
| UIJ65355.1 | Prephenate dehydratase                                                                        |      |   |    |    |    |    |    |    |    |
| UIJ69000.1 | Cytosolic protein                                                                             |      |   |    |    |    |    |    |    |    |
| UIJ65137.1 | Lipoate--protein ligase family protein                                                        |      |   |    |    |    |    |    |    |    |
| UIJ65422.1 | Ribonuclease ph                                                                               |      |   |    |    |    |    |    |    |    |
| UIJ64720.1 | Dna mismatch repair endonuclease mutl                                                         |      |   |    |    |    |    |    |    |    |
| UIJ64864.1 | Bacillithiol biosynthesis cysteine-adding enzyme bshc                                         |      |   |    |    |    |    |    |    |    |
| UIJ67546.1 | Aaa family atpase                                                                             |      |   |    |    |    |    |    |    |    |
| UIJ68095.1 | Oxaloacetate-decarboxylating malate dehydrogenase                                             |      |   |    |    |    |    |    |    |    |
| UIJ67411.1 | Duf4026 domain-containing protein                                                             |      |   |    |    |    |    |    |    |    |
| UIJ64612.1 | Alkene reductase                                                                              |      |   |    |    |    |    |    |    |    |
| UIJ68571.1 | (2,3-dihydroxybenzoyl)adenylate synthase                                                      |      |   |    |    |    |    |    |    |    |
| UIJ68511.1 | Yuei family protein                                                                           |      |   |    |    |    |    |    |    |    |
| UIJ66556.1 | Cpsd/capb family tyrosine-protein kinase                                                      |      |   |    |    |    |    |    |    |    |
| UIJ65872.1 | Methionine abc transporter atp-binding protein                                                |      |   |    |    |    |    |    |    |    |
| UIJ65219.1 | Trna (adenine(22)-n(1))-methyltransferase trmk                                                |      |   |    |    |    |    |    |    |    |
| UIJ64759.1 | Bifunctional riboflavin kinase/fad synthetase                                                 |      |   |    |    |    |    |    |    |    |
| UIJ65175.1 | Helix-turn-helix domain-containing protein                                                    |      |   |    |    |    |    |    |    |    |
| UIJ66288.1 | Pin/tram domain-containing protein                                                            |      |   |    |    |    |    |    |    |    |
| UIJ67318.1 | Dihydroxyacetone kinase subunit dhak                                                          |      |   |    |    |    |    |    |    |    |
| UIJ66706.1 | M20 peptidase aminoacylase family protein                                                     |      |   |    |    |    |    |    |    |    |
| UIJ65204.1 | Penicillin-binding protein 2                                                                  |      |   |    |    |    |    |    |    |    |
| UIJ65626.1 | Srbcc domain-containing protein                                                               |      |   |    |    |    |    |    |    |    |
| UIJ64893.1 | Peptidyl-prolyl cis-trans isomerase                                                           |      |   |    |    |    |    |    |    |    |
| UIJ64998.1 | Gnat family n-acetyltransferase ribt                                                          |      |   |    |    |    |    |    |    |    |
| UIJ67893.1 | Biotin--[acetyl-coa-carboxylase] ligase                                                       |      |   |    |    |    |    |    |    |    |
| UIJ68071.1 | Peptidase e                                                                                   |      |   |    |    |    |    |    |    |    |
| UIJ65445.1 | Succinate dehydrogenase cytochrome b558                                                       |      |   |    |    |    |    |    |    |    |
| UIJ64682.1 | Heavy metal translocating p-type atpase                                                       |      |   |    |    |    |    |    |    |    |

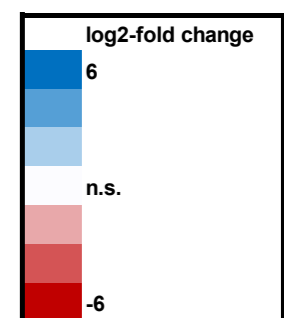

|            |                                                                                                                            |                                                                            |   |   |  |  |   |   |   |   |
|------------|----------------------------------------------------------------------------------------------------------------------------|----------------------------------------------------------------------------|---|---|--|--|---|---|---|---|
| UIJ67285.1 |                                                                                                                            | Dna (cytosine-5-)-methyltransferase                                        | ■ |   |  |  |   |   |   |   |
| UIJ65786.1 |                                                                                                                            | Aminotransferase                                                           | ■ |   |  |  |   |   |   |   |
| UIJ65584.1 |                                                                                                                            | Gfo/idh/moca family oxidoreductase                                         | ■ |   |  |  |   |   |   |   |
| UIJ68510.1 |                                                                                                                            | Aldehyde dehydrogenase family protein                                      | ■ |   |  |  |   |   |   |   |
| UIJ67895.1 |                                                                                                                            | 3-methyl-2-oxobutanoate hydroxymethyltransferase                           | ■ |   |  |  |   |   |   |   |
| UIJ66413.1 |                                                                                                                            | Yfho family protein                                                        | ■ | ■ |  |  | ■ |   | ■ |   |
| UIJ69840.1 |                                                                                                                            | Hypothetical protein Iw858 31855 (plasmid)                                 | ■ |   |  |  |   |   |   |   |
| UIJ67720.1 |                                                                                                                            | Abortive phage infection protein                                           |   |   |  |  | ■ | ■ |   | ■ |
| UIJ65300.1 |                                                                                                                            | Yrns family protein                                                        | ■ |   |  |  |   |   |   |   |
| UIJ69099.1 |                                                                                                                            | Hypothetical protein Iw858 13180                                           | ■ |   |  |  |   |   |   |   |
| UIJ64789.1 |                                                                                                                            | Signal peptidase i                                                         | ■ |   |  |  | ■ |   |   | ■ |
| UIJ66515.1 |                                                                                                                            | Low molecular weight protein arginine phosphatase                          | ■ |   |  |  |   |   |   |   |
| UIJ65712.1 |                                                                                                                            | Yitt family protein                                                        | ■ |   |  |  | ■ |   |   |   |
| UIJ64667.1 |                                                                                                                            | Tma (adenosine(37)-n6)-dimethylallyltransferase miaa                       | ■ |   |  |  |   |   |   |   |
| UIJ68081.1 |                                                                                                                            | Duf445 domain-containing protein                                           | ■ |   |  |  | ■ |   |   |   |
| UIJ65998.1 |                                                                                                                            | Thioredoxin-disulfide reductase                                            | ■ |   |  |  |   |   |   |   |
| UIJ67416.1 |                                                                                                                            | Tetr/acrr family transcriptional regulator                                 |   |   |  |  | ■ |   |   |   |
| UIJ65608.1 |                                                                                                                            | Thioredoxin family protein                                                 | ■ |   |  |  |   |   |   |   |
| UIJ67885.1 |                                                                                                                            | Zinc metalloproteinase                                                     | ■ |   |  |  |   |   |   |   |
| UIJ64894.1 |                                                                                                                            | Phoh family protein                                                        | ■ |   |  |  |   | ■ |   | ■ |
| UIJ68527.1 |                                                                                                                            | Sporulation protein                                                        | ■ |   |  |  |   |   |   |   |
| UIJ70204.1 |                                                                                                                            | Replication/maintenance protein repl (plasmid)                             | ■ |   |  |  |   |   |   |   |
| UIJ65045.1 | Bifunctional diamino hydroxyphosphoribosylaminopyrimidine deaminase/5-amino-6-(5-phosphoribosylamino)uracil reductase ribd |                                                                            | ■ |   |  |  |   |   |   |   |
| UIJ64665.1 |                                                                                                                            | Tyrosine-type recombinase/integrase                                        | ■ |   |  |  |   |   |   |   |
| UIJ64338.1 |                                                                                                                            | Oxidoreductase                                                             | ■ |   |  |  |   |   | ■ |   |
| UIJ69081.1 |                                                                                                                            | Heme-degrading monooxygenase hmoa                                          | ■ |   |  |  |   | ■ |   |   |
| UIJ64738.1 |                                                                                                                            | Insulinase family protein                                                  | ■ |   |  |  |   |   |   |   |
| UIJ68630.1 |                                                                                                                            | Duf5519 family protein                                                     | ■ |   |  |  |   |   |   |   |
| UIJ66504.1 |                                                                                                                            | Type b 50s ribosomal protein I31                                           | ■ |   |  |  |   |   |   |   |
| UIJ69885.1 |                                                                                                                            | Hypothetical protein Iw858 31605 (plasmid)                                 | ■ |   |  |  |   |   |   |   |
| UIJ69571.1 |                                                                                                                            | Hu family dna-binding protein (plasmid)                                    | ■ |   |  |  |   |   |   |   |
| UIJ66385.1 |                                                                                                                            | Cell wall metabolism dna-binding response regulator walr                   | ■ | ■ |  |  |   |   | ■ |   |
| UIJ65092.1 |                                                                                                                            | Butyrate kinase                                                            | ■ |   |  |  |   |   |   |   |
| UIJ68491.1 |                                                                                                                            | Alcohol dehydrogenase adhp                                                 | ■ |   |  |  |   |   |   |   |
| UIJ65018.1 |                                                                                                                            | Marr family transcriptional regulator                                      | ■ | ■ |  |  |   |   | ■ | ■ |
| UIJ65705.1 |                                                                                                                            | S-ribosylhomocysteine lyase luxs                                           | ■ |   |  |  |   |   |   |   |
| UIJ67007.1 |                                                                                                                            | Fructose-6-phosphate aldolase                                              | ■ |   |  |  |   |   |   |   |
| UIJ65247.1 |                                                                                                                            | Elongation factor 4                                                        | ■ |   |  |  |   |   |   |   |
| UIJ67785.1 |                                                                                                                            | Diaminopimelate decarboxylase                                              | ■ |   |  |  |   |   | ■ |   |
| UIJ67901.1 |                                                                                                                            | Aspartate transaminase aspb                                                | ■ |   |  |  |   |   |   |   |
| UIJ68465.1 |                                                                                                                            | Thymidylate synthase                                                       | ■ |   |  |  |   |   |   |   |
| UIJ67915.1 |                                                                                                                            | Class i sam-dependent rna methyltransferase                                | ■ | ■ |  |  |   |   | ■ |   |
| UIJ69961.1 |                                                                                                                            | Duf2089 domain-containing protein (plasmid)                                | ■ |   |  |  |   |   |   |   |
| UIJ67337.1 |                                                                                                                            | Heavy metal-binding domain-containing protein                              | ■ | ■ |  |  |   |   |   | ■ |
| UIJ65365.1 |                                                                                                                            | 50s ribosomal protein I21                                                  | ■ |   |  |  |   |   |   |   |
| UIJ69838.1 |                                                                                                                            | Rpn family recombination-promoting nuclease/putative transposase (plasmid) | ■ |   |  |  |   |   |   |   |
| UIJ65589.1 |                                                                                                                            | Catabolite control protein a                                               | ■ |   |  |  |   |   |   |   |
| UIJ67011.1 |                                                                                                                            | (r,r)-butanediol dehydrogenase                                             | ■ |   |  |  |   |   |   |   |
| UIJ66709.1 |                                                                                                                            | Peroxiredoxin                                                              | ■ |   |  |  |   |   |   |   |
| UIJ65974.1 |                                                                                                                            | Triose-phosphate isomerase                                                 | ■ |   |  |  |   |   |   |   |
| UIJ65250.1 |                                                                                                                            | 30s ribosomal protein s20                                                  | ■ |   |  |  |   |   |   |   |
| UIJ65296.1 |                                                                                                                            | O-acetylserine dependent cystathionine beta-synthase                       | ■ |   |  |  |   |   |   |   |
| UIJ65769.1 |                                                                                                                            | Cold-shock protein cspd                                                    | ■ |   |  |  |   |   |   |   |
| UIJ67816.1 |                                                                                                                            | Duf47 domain-containing protein                                            | ■ |   |  |  |   |   |   |   |
| UIJ65976.1 |                                                                                                                            | Type i glyceraldehyde-3-phosphate dehydrogenase                            | ■ |   |  |  |   |   |   |   |
| UIJ66708.1 |                                                                                                                            | Alkyl hydroperoxide reductase subunit f                                    | ■ |   |  |  |   |   |   |   |
| UIJ65503.1 |                                                                                                                            | Glyceraldehyde-3-phosphate dehydrogenase                                   | ■ |   |  |  |   |   |   |   |
| UIJ66136.1 |                                                                                                                            | Rna-binding transcriptional accessory protein                              | ■ |   |  |  |   |   |   |   |
| UIJ65067.1 |                                                                                                                            | N-acetyl-gamma-glutamyl-phosphate reductase                                | ■ |   |  |  |   |   |   |   |
| UIJ66128.1 |                                                                                                                            | Redox-sensing transcriptional repressor rex                                | ■ |   |  |  |   |   |   |   |
| UIJ64800.1 |                                                                                                                            | 3-oxoacyl-[acyl-carrier-protein] reductase                                 | ■ |   |  |  |   |   |   |   |
| UIJ65485.1 |                                                                                                                            | Phenylalanine--trna ligase subunit alpha                                   | ■ |   |  |  |   |   |   |   |
| UIJ65676.1 |                                                                                                                            | Phosphoenolpyruvate carboxykinase (atp)                                    | ■ |   |  |  |   |   |   |   |
| UIJ65448.1 |                                                                                                                            | Thioredoxin                                                                | ■ |   |  |  |   |   |   |   |
| UIJ65089.1 |                                                                                                                            | 3-methyl-2-oxobutanoate dehydrogenase subunit beta                         | ■ |   |  |  |   |   |   |   |
| UIJ65297.1 |                                                                                                                            | 5'-methylthioadenosine/s-adenosylhomocysteine nucleosidase                 | ■ |   |  |  |   |   |   |   |
| UIJ65800.1 |                                                                                                                            | Hotdog fold thioesterase                                                   | ■ |   |  |  |   |   |   |   |
| UIJ65779.1 |                                                                                                                            | L-lactate dehydrogenase                                                    | ■ |   |  |  |   |   |   |   |
| UIJ66554.1 |                                                                                                                            | Rod shape-determining protein                                              | ■ |   |  |  |   |   |   |   |
| UIJ68467.1 |                                                                                                                            | Penicillin-binding protein 3                                               | ■ |   |  |  |   |   |   |   |
| UIJ66351.1 |                                                                                                                            | Duf3797 domain-containing protein                                          | ■ |   |  |  |   |   |   |   |
| UIJ67406.1 |                                                                                                                            | Heme-degrading monooxygenase hmob                                          | ■ |   |  |  |   |   |   |   |
| UIJ69452.1 |                                                                                                                            | Nad-dependent malic enzyme                                                 | ■ |   |  |  |   |   |   |   |
| UIJ64517.1 |                                                                                                                            | Gnat family n-acetyltransferase                                            | ■ |   |  |  |   |   |   |   |
| UIJ64570.1 |                                                                                                                            | Trypsin-like peptidase domain-containing protein                           | ■ |   |  |  |   |   |   |   |
| UIJ67203.1 |                                                                                                                            | Nadp-dependent glyceraldehyde-3-phosphate dehydrogenase                    | ■ |   |  |  |   |   |   |   |
| UIJ65877.1 |                                                                                                                            | Arsenate reductase family protein                                          | ■ |   |  |  |   |   |   |   |
| UIJ67392.1 |                                                                                                                            | Ytxh domain-containing protein                                             | ■ |   |  |  |   |   |   |   |
| UIJ66398.1 |                                                                                                                            | Udp-glucose 4-epimerase gale                                               | ■ |   |  |  |   |   |   |   |
| UIJ64954.1 |                                                                                                                            | Extracellular solute-binding protein                                       | ■ | ■ |  |  |   |   |   |   |
| UIJ66311.1 |                                                                                                                            | S1 domain-containing rna-binding protein                                   | ■ |   |  |  |   |   |   |   |
| UIJ65519.1 |                                                                                                                            | 6-phosphofructokinase                                                      | ■ |   |  |  |   |   |   |   |
| UIJ66616.1 |                                                                                                                            | Spfh domain-containing protein                                             | ■ |   |  |  |   |   |   |   |
| UIJ67099.1 |                                                                                                                            | K(+)-transporting atpase subunit c                                         | ■ |   |  |  |   |   |   |   |
| UIJ68939.1 |                                                                                                                            | Manganese-dependent inorganic pyrophosphatase                              | ■ |   |  |  |   |   |   |   |
| UIJ67470.1 |                                                                                                                            | Rna chaperone/antiterminator cspa                                          | ■ |   |  |  |   |   |   |   |
| UIJ68409.1 |                                                                                                                            | Iron-sulfur cluster repair di-iron protein                                 | ■ |   |  |  |   |   |   |   |
| UIJ65028.1 |                                                                                                                            | Transcriptional repressor                                                  | ■ |   |  |  |   |   |   |   |
| UIJ69506.1 |                                                                                                                            | Peptide chain release factor 1                                             | ■ |   |  |  |   |   |   |   |
| UIJ64795.1 |                                                                                                                            | Signal recognition particle protein                                        | ■ |   |  |  |   |   |   |   |
| UIJ67409.1 |                                                                                                                            | Ferrochelatase                                                             | ■ |   |  |  |   |   |   |   |
| UIJ68609.1 |                                                                                                                            | Protoporphyrinogen oxidase                                                 | ■ |   |  |  |   |   |   |   |
| UIJ65326.1 |                                                                                                                            | Histidine--trna ligase                                                     | ■ |   |  |  |   |   |   |   |
| UIJ65064.1 |                                                                                                                            | Acetylornithine transaminase                                               | ■ |   |  |  |   |   |   |   |
| UIJ67394.1 |                                                                                                                            | Abc transporter atp-binding protein ecsr                                   | ■ |   |  |  |   |   |   |   |
| UIJ70084.1 |                                                                                                                            | Duf2325 domain-containing protein (plasmid)                                | ■ |   |  |  |   |   |   |   |
| UIJ65651.1 |                                                                                                                            | Leucine--trna ligase                                                       | ■ |   |  |  |   |   |   |   |
| UIJ65526.1 |                                                                                                                            | Bifunctional oligoribonuclease/pap phosphatase rna                         | ■ |   |  |  |   |   |   |   |
| UIJ66257.1 |                                                                                                                            | 50s ribosomal protein I22                                                  | ■ |   |  |  |   |   |   |   |
| UIJ69954.1 |                                                                                                                            | Efflux rmd transporter periplasmic adaptor subunit (plasmid)               | ■ |   |  |  |   |   |   |   |
